# Supplementary material for: Single worm transcriptomics identifies a developmental core network of oscillating genes with deep conservation across nematodes
Source: HighWire-hosted journal article supplement (doi:10.1101/gr.275303.121), 2021-07-22
Supplement: Supplemental_Material_.docx [file Supplemental_Material_.docx]

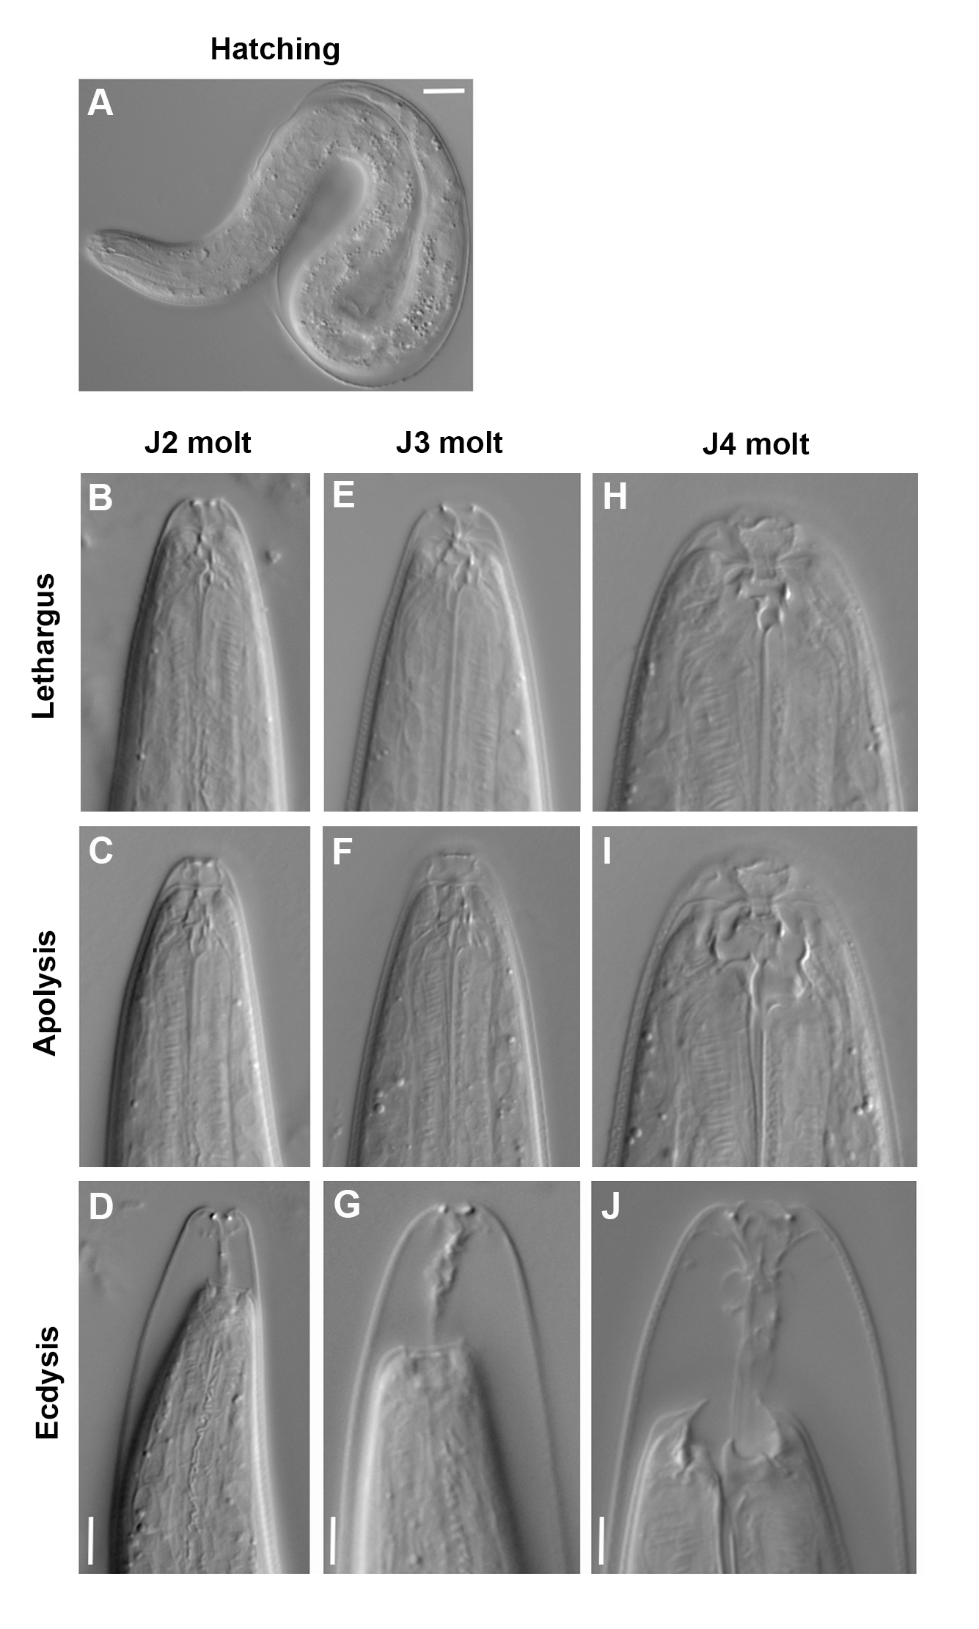


**Supplemental Figure S1. Developmental markers were used to define the duration of juvenile stage in *P. pacificus*, related to Fig 1.** Images showing the head part of the animals at the hatching (A), the lethargus (a period of inactivity during which pharyngeal pumping, feeding, and locomotion become arrested) of the 2nd, 3rd, 4th molt (B, E, H), the apolysis of the 2nd, 3rd, 4th molt (C, F, I), and the ecdysis (rupture and shedding of the old cuticle) [(Lee 2002)](https://paperpile.com/c/ma68XQ/5rAh) of the 2nd, 3rd, 4th molt (D, G, J), scalar bar is 10 μm.


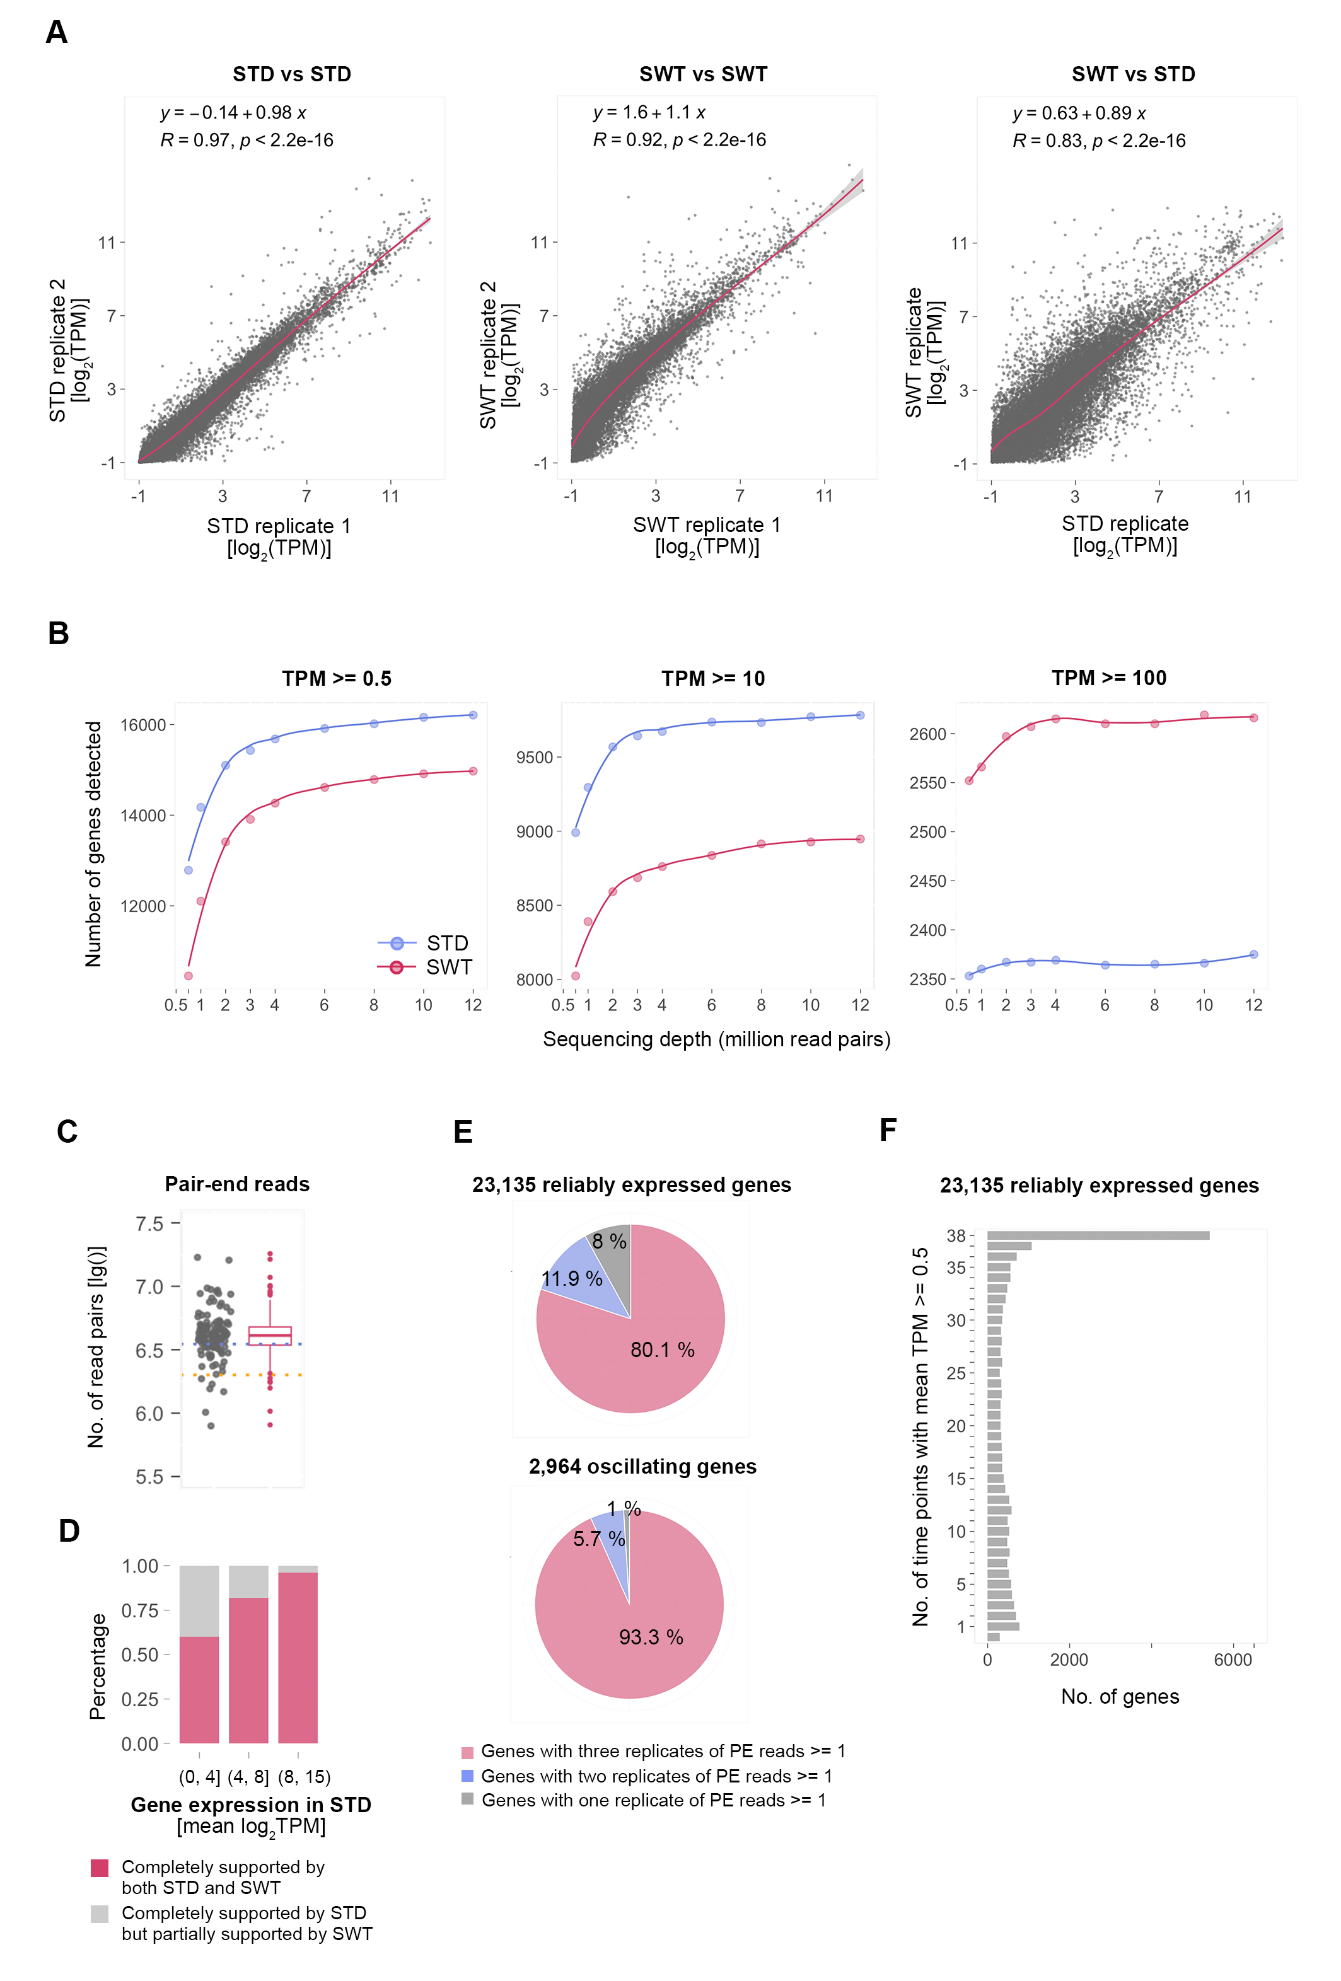


**Supplemental Figure S2. Evaluation of single worm transcriptomic (SWT) libraries, related to Fig 1.** (A) The scatter plots present the log2(TPM) of all genes between individual STD replicates (left), SWT replicates (middle), and STD replicate and SWT replicate (right). The replicates of STD and SWT are at the lethargus of the fourth molt. (B) The line plots show the number of detected genes as a function of sequencing depth for individual STD and SWT replicates with more than 12 million reads. Subsampling of reads was done for nine levels of sequencing depth and the number of detected genes was assessed for three different expression levels (TPM >= 0.5 (left), TPM >= 10 (middle), TPM >= 100 (right))- (C) The boxplot displays the number of read pairs (log10) for all 114 samples, the blue line corresponds to the mean sequencing depth of 4.5 M read pairs, the orange line shows the sequencing depth of 2 M read pairs. (D) The bar plot shows the percentage of expressed genes in STD samples with completely (red) or partially (grey) supported by SWT-seq, 100 genes were randomly chosen from three different gene groups with distinct gene expression level in the STD samples (Supplemental Table S13) and the degree of gene structure support was manually assessed after inspection of alignment files in a genome browser. (E) The pie charts present the degree of the genes with three replicates of TPM >=1 (red), the genes with two replicates of TPM >=1 (blue), the genes with one replicate of TPM >=1 (grey), in the 23,135 reliably expression gene set (upper) and the 2,964 oscillating gene set (lower). (F) The barplot shows the number of time points where the reliably expressed genes displayed the TPM is equal or greater than 0.5.


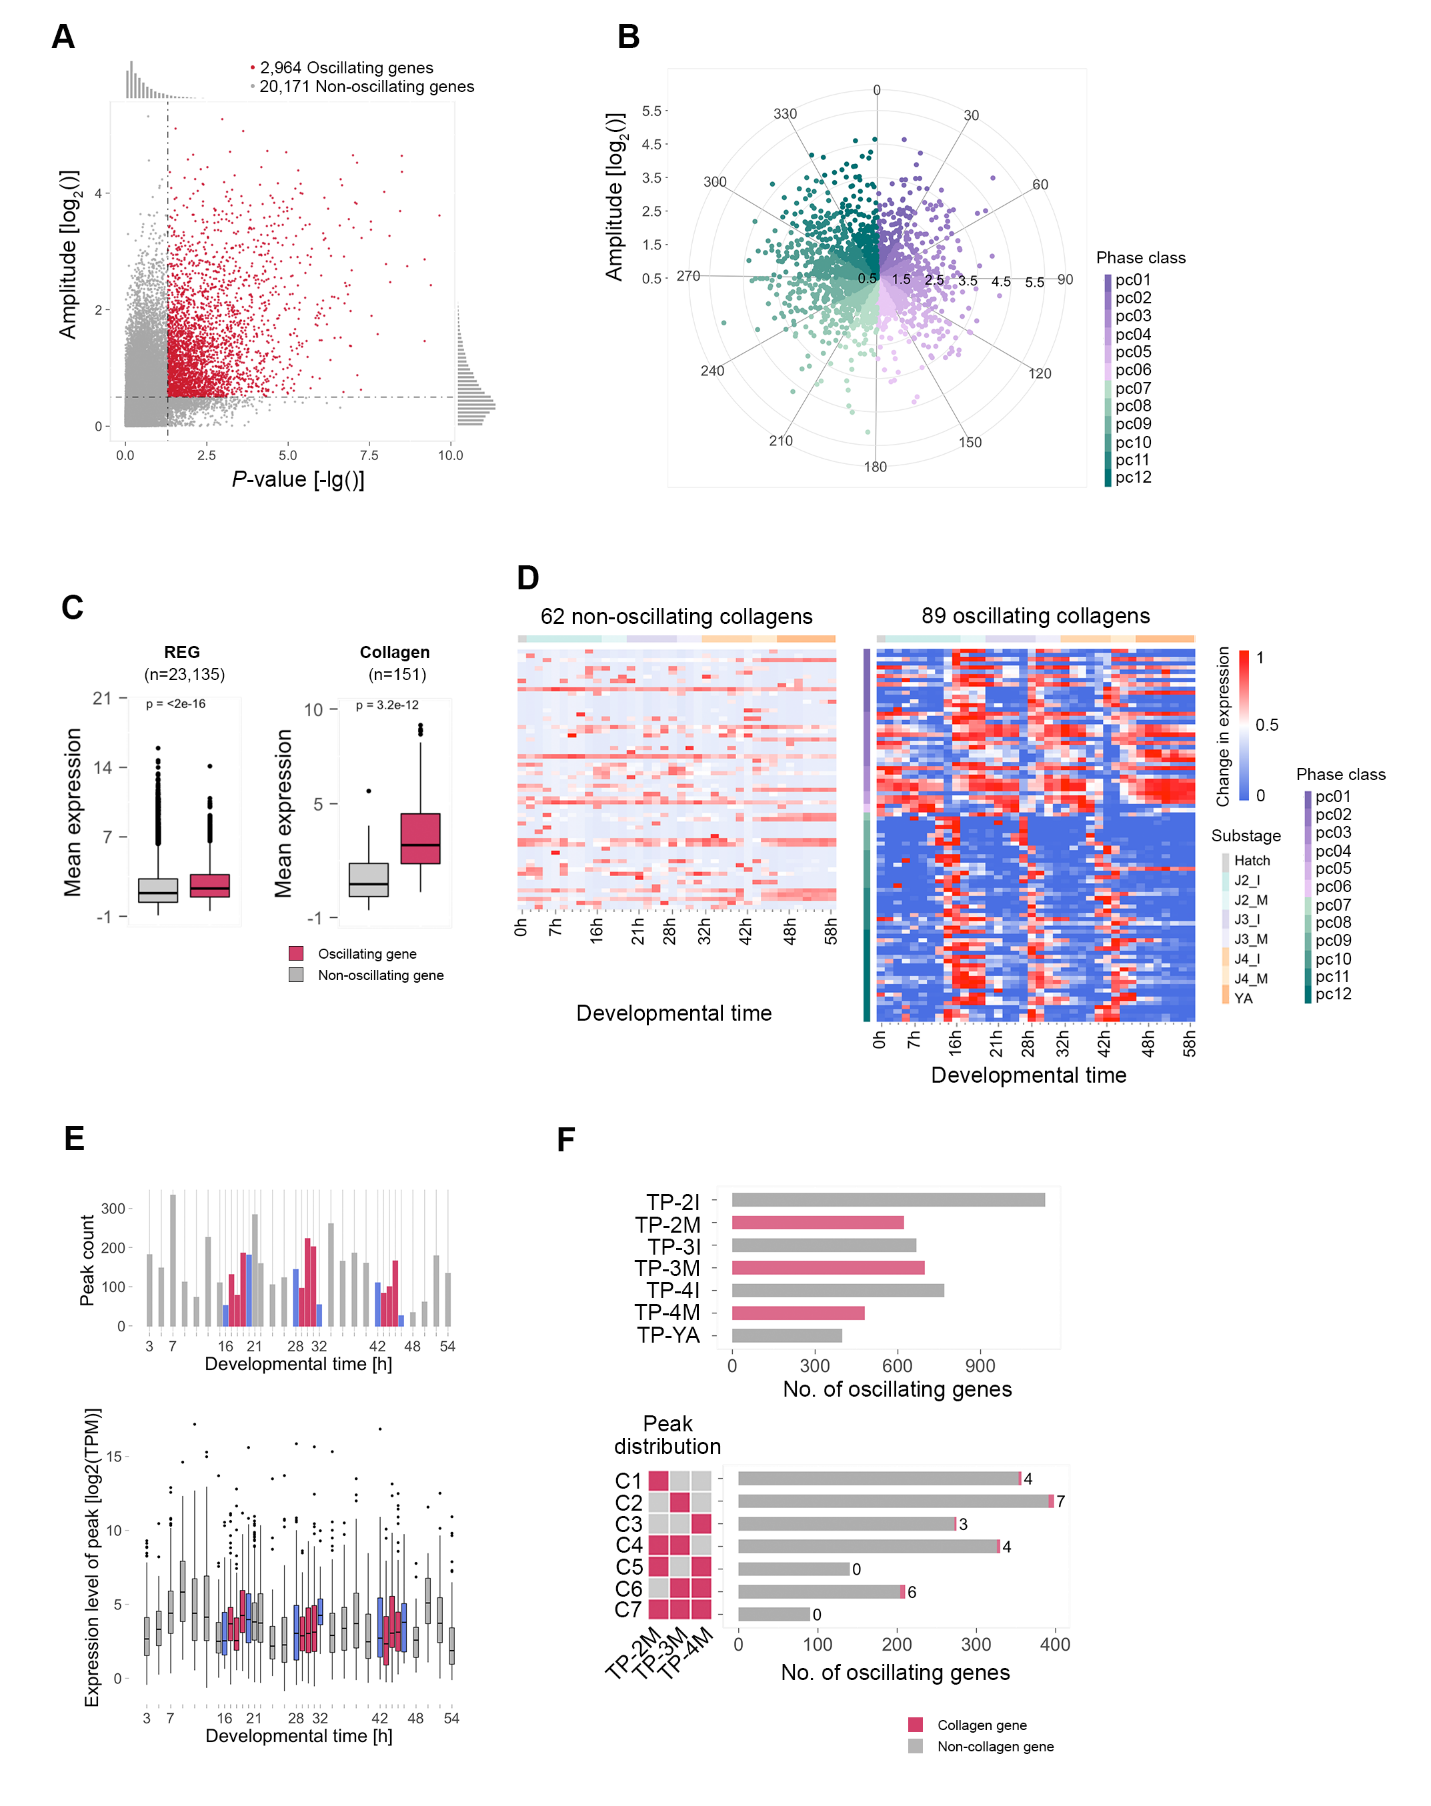


**Supplemental Figure S3. Thousands of oscillating genes are synchronized with the molting cycle in *P. pacificus*, related to Fig 2.** (A) Scatter plot classifying genes with oscillating expression in red (n=2,964). Two indicators, log2(meta2d_amplitude) >= 0.5 and *P*-value < 0.05, were used for gene classification. Genes below either indicator were grouped into the “non-oscillating genes” (grey, n=20,171). (B) Radar chart profiling oscillation amplitude over the phase of peak expression. Each point indicates the log2-transformed amplitude, and phase classes. (C) The boxplots show the variation in mean expression of genes between oscillating and non-oscillating groups in the 23,135 REG gene set (left) and in the 151 collagen family (right). (D) The heatmaps visualize the changes in gene expression traces throughout development for non-oscillating collagens (n=62, right) and oscillating collagens (n=89, right). The mean TPM was calculated from three biological replicates and was normalized by its maximum of each expression trace. The order of rows in the heatmap with the oscillating genes was sorted by phase class, which indicated a phase difference of 30, corresponding to a peak shift by roughly one hour. (E) The upper barplot shows the number of peaks across 34 time points. The three substages in each molt are colored in red, and the hour before and after molt are defined as molting periods (see Materials and Methods) in blue. The lower boxplot profiles the distribution of the gene expression levels at the time point of peaks among 34 time points. (F) The upper barplot displays the number of the oscillation genes which exhibit expression peaks during the molting periods, inter-molting periods. The lower barplot shows the number of collagens (red) and non-collagens (grey) among seven peak classes (C1-C7, see Materials and Methods for details), The color code in the heatmap, red means peak and grey means not peak.


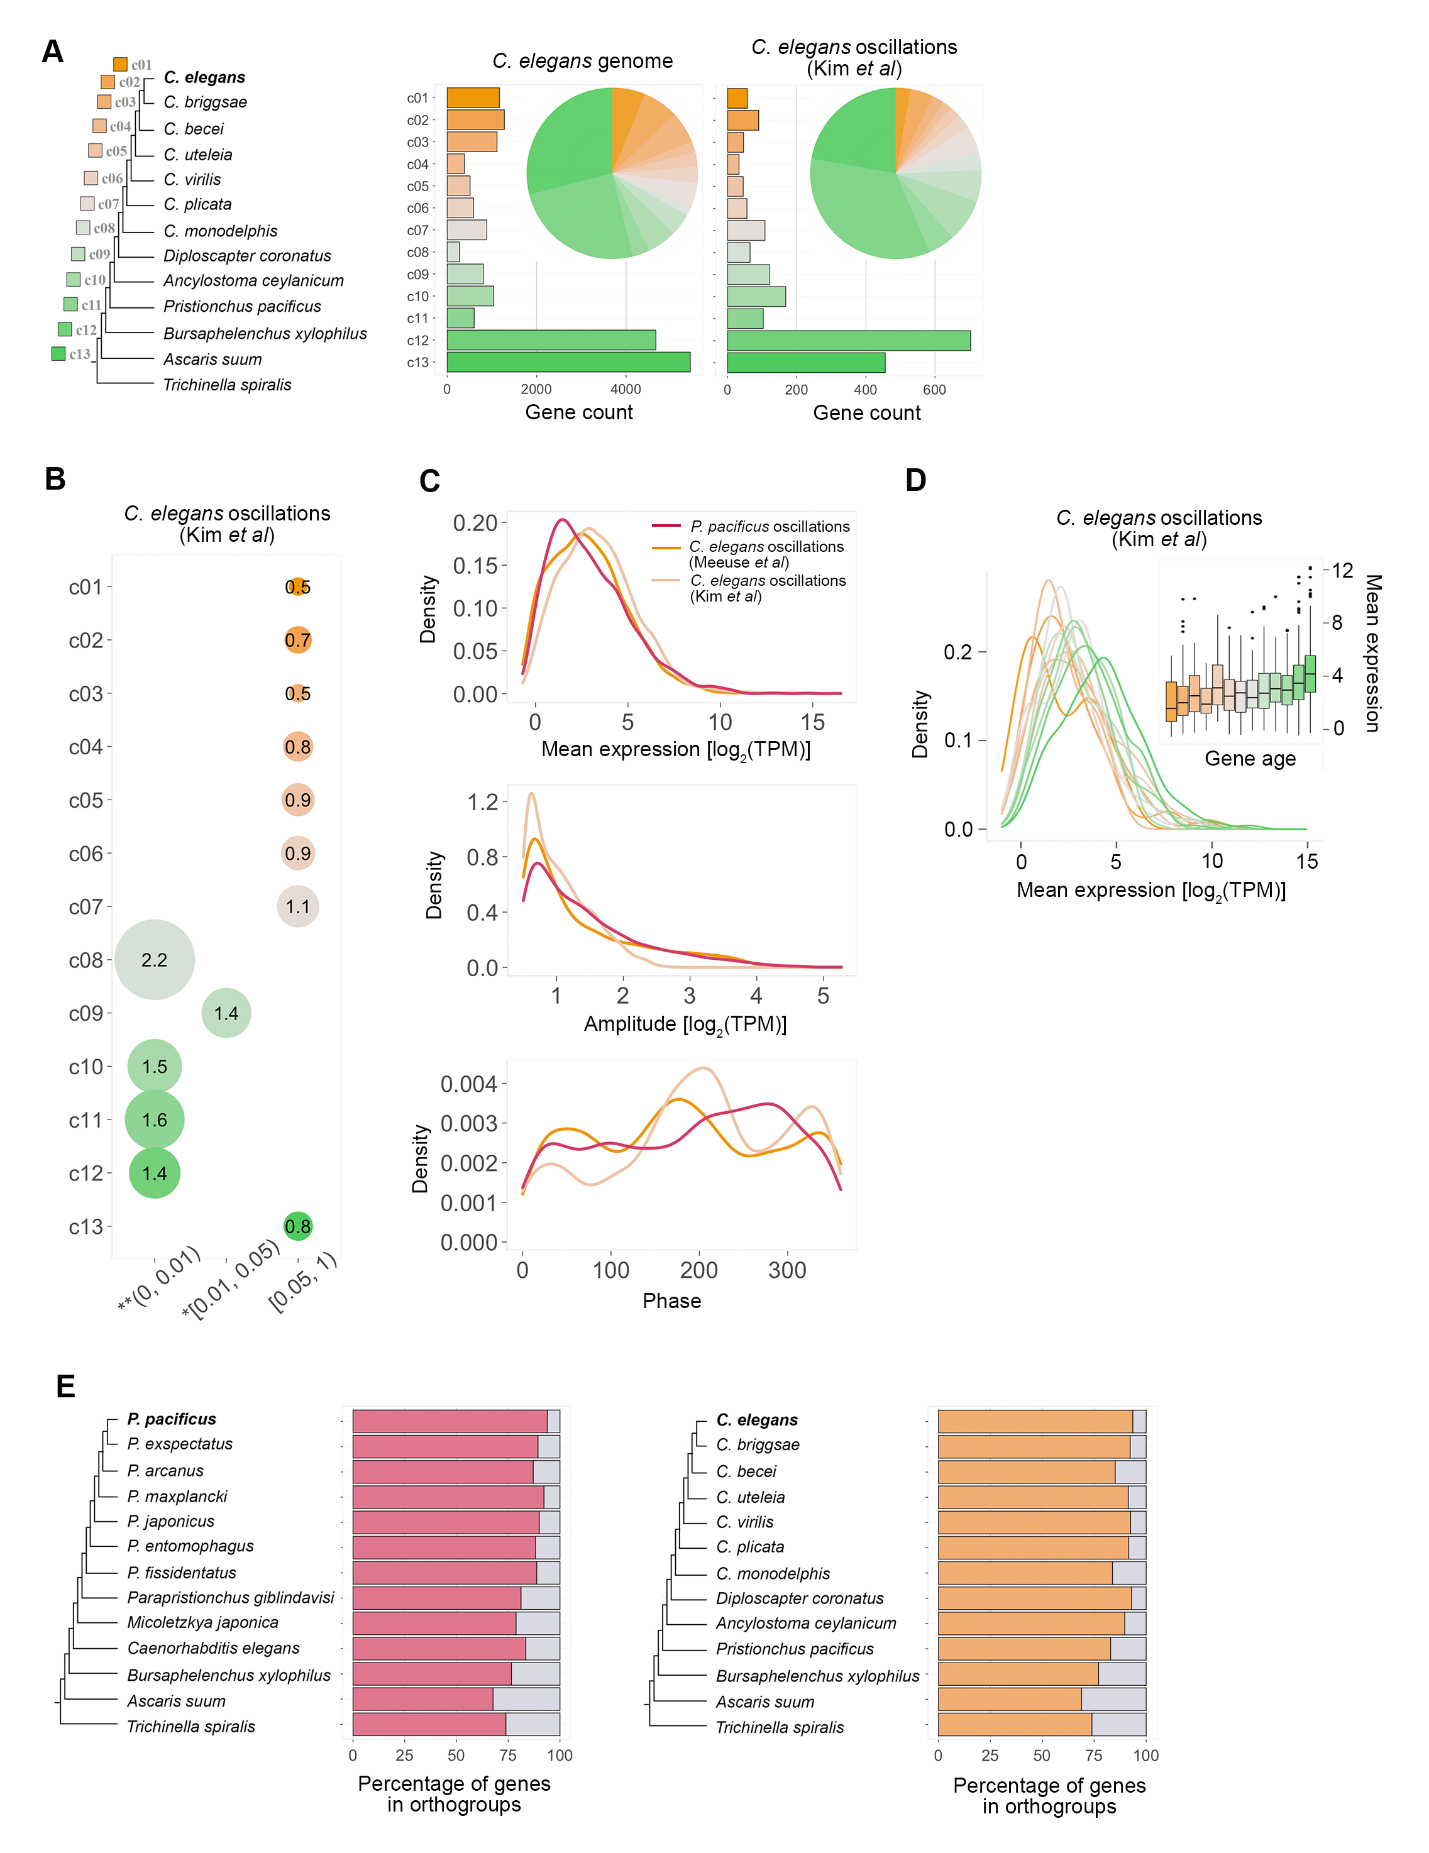


**Supplemental Figure S4. Ancient gene classes are enriched for oscillatory genes,  related to Fig 3.** (A) *C. elegans* genes were assigned to age classes based on the most distant ortholog in a given orthology cluster. The age classes are labeled in a yellow (young) - green (old) gradient. The distribution of gene number among the 13 age classes for the *C. elegans* genome (n = 20,040) is shown in the central graph, and the distribution for the *C. elegans* oscillating genes of Kim et al (2013) (n = 2,221) is shown in the right part. (B) The graphs indicate the overrepresentation of gene age classes among the *C. elegans* oscillating genes sets of Kim et al (2020). The size of the circles indicates the enrichment score, the x-axis shows the significance level measured by Fisher’s exact test. (C) The plots show the distribution of average expression (top), amplitude (middle), and phase (bottom) of the oscillating genes in *P. pacificus* (red), the *C. elegans* oscillating genes of Meeuse et al (2020) (dark yellow), and the *C. elegans* oscillating genes of Kim et al (2013) (light yellow). (D) The plots show the distribution of the mean expression of the *C. elegans* oscillating genes of Kim et al (2013) across 13 gene age classes. (E) The barplots visualize the percentage of genes in orthogroups (assigned genes) across 13 species on the phylogeny in *P. pacificus* (left) and *C. elegans* (right). 27,132 (93.9 %) *P. pacificus* annotated genes and 18,750 (93.6 %) *C. elegans* annotated genes were assigned into orthogroups, respectively.


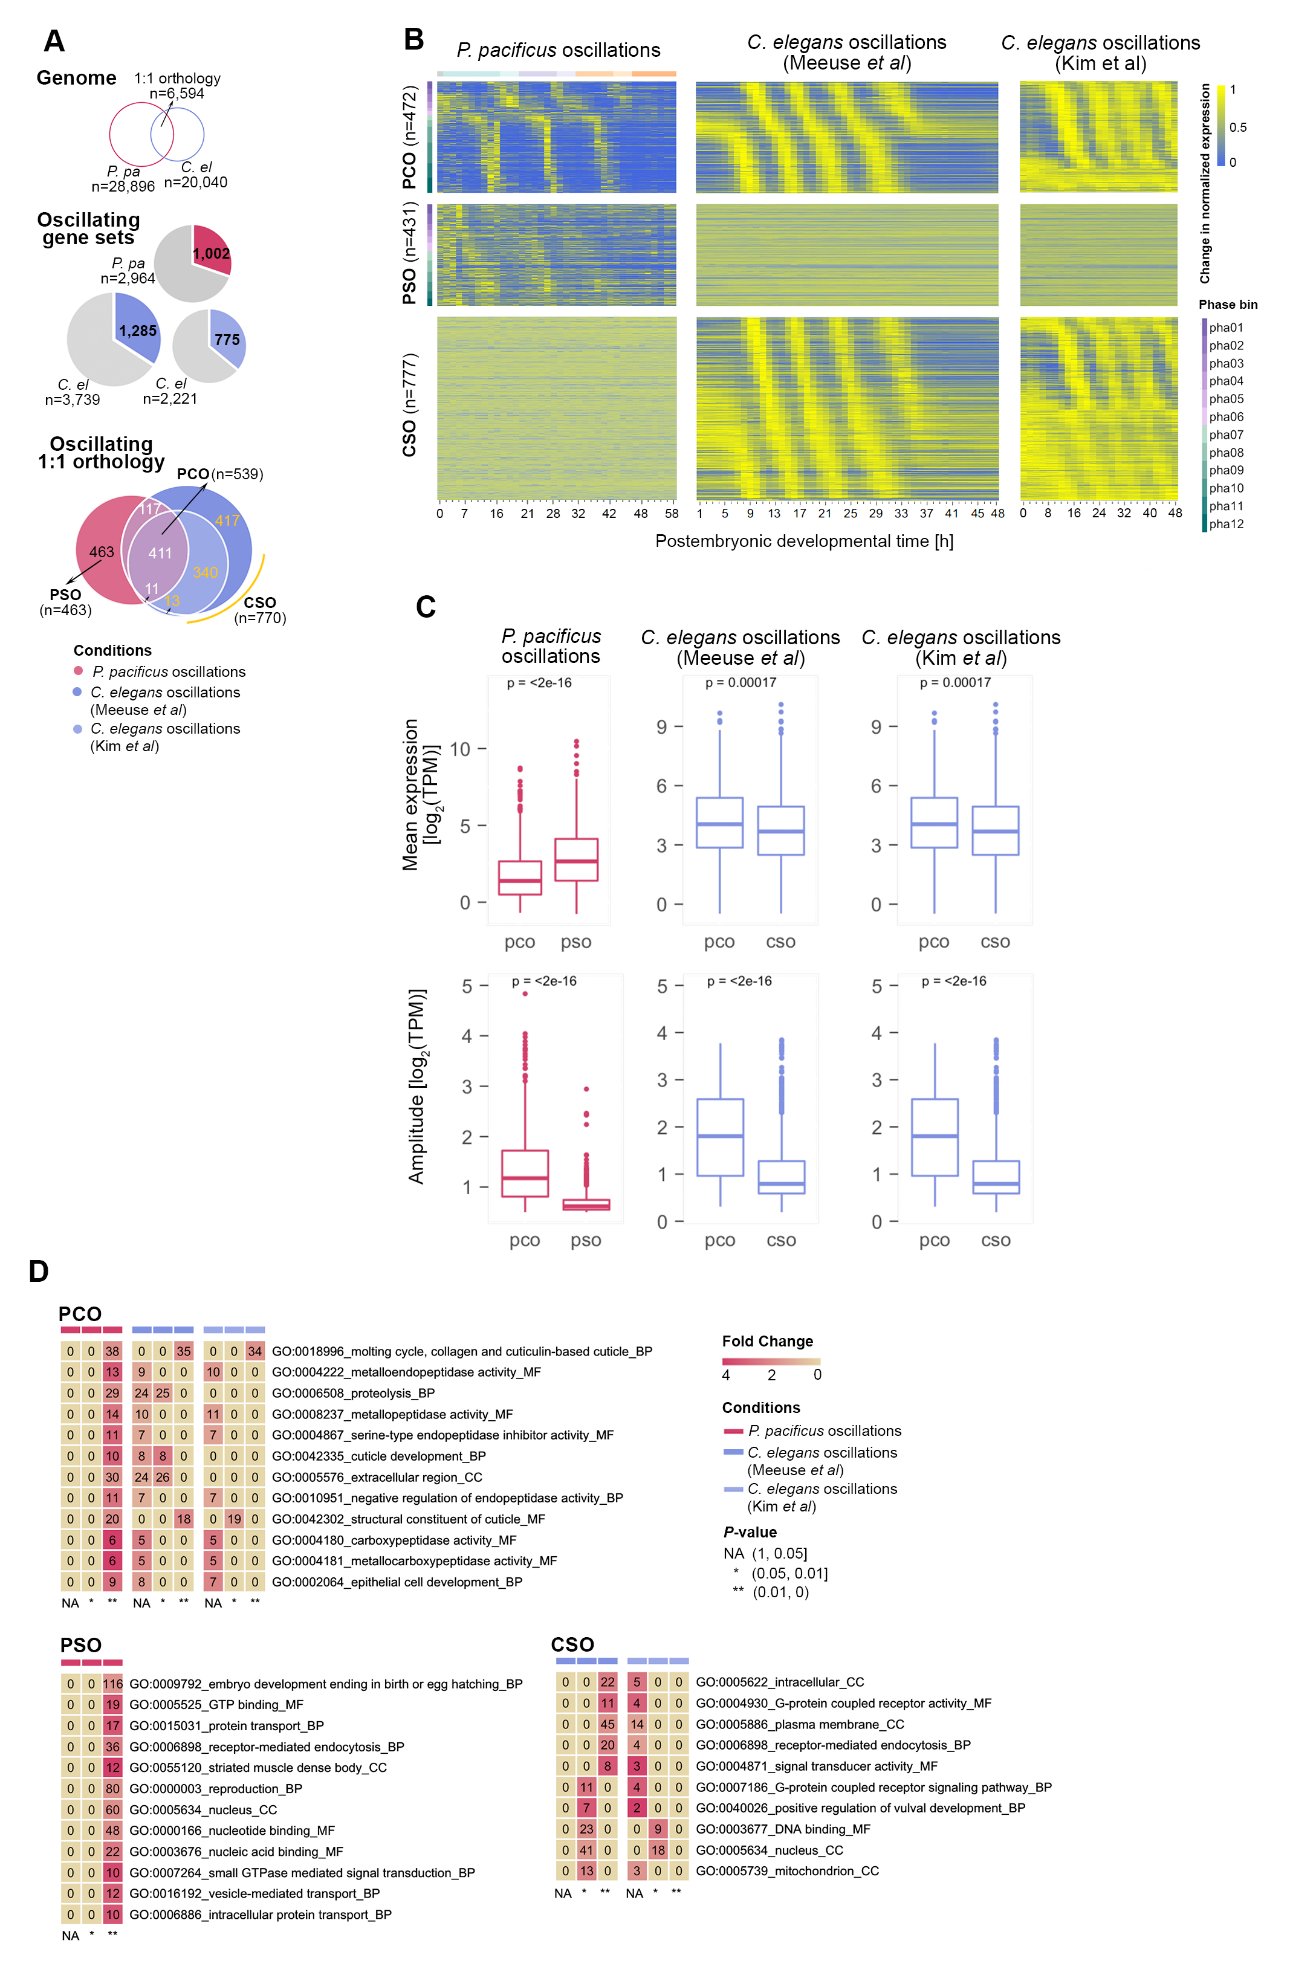


**Supplemental Figure S5.  Orthologous oscillatory genes among three oscillating gene sets,  related to Fig 4** (A)A total of 6,594 one-to-one orthologous gene pairs were identified between *P. pacificus* and *C. elegans*. In *P. pacificus,* the oscillating gene set contains 1,002 one-to-one orthologous genes, in *C. elegans* oscillating genes of Meeuse et al (2020) it includes 1,285 one-to-one orthologous genes, and in *C. elegans* oscillating genes of Kim et al (2013) it includes 775 one-to-one orthologous genes. Of these genes, 539 one-to-one orthologous genes are oscillating in both species (defined as *P. pacificus* conserved oscillations, ‘PCO‘), 463 orthologous genes show *P. pacificus*-specific oscillating pattern (PSO), and 770 orthologous genes were classified as *C. elegans*-specific oscillations (CSO). (B) The heatmaps show the developmental expression of the three gene classes (PCO, PSO and CSO) in *P. pacificus* and *C. elegans*. (C) The box plots display the variation in the mean expression (top) and the amplitude (bottom) of oscillation between PCO and PSO in *P. pacificus* (red) and between PCO and CSO in *C. elegans* (blue). (D) The matrices show the levels of significance for the tests of GO (gene ontology) overrepresentation among the three oscillating gene classes. The color scale indicates the fold change, the labeling of matrix cells shows the number of oscillating genes containing a specific GO term, the three sub-ontologies containing biological process (BP), molecular function (MF), and cellular component (CC).

­
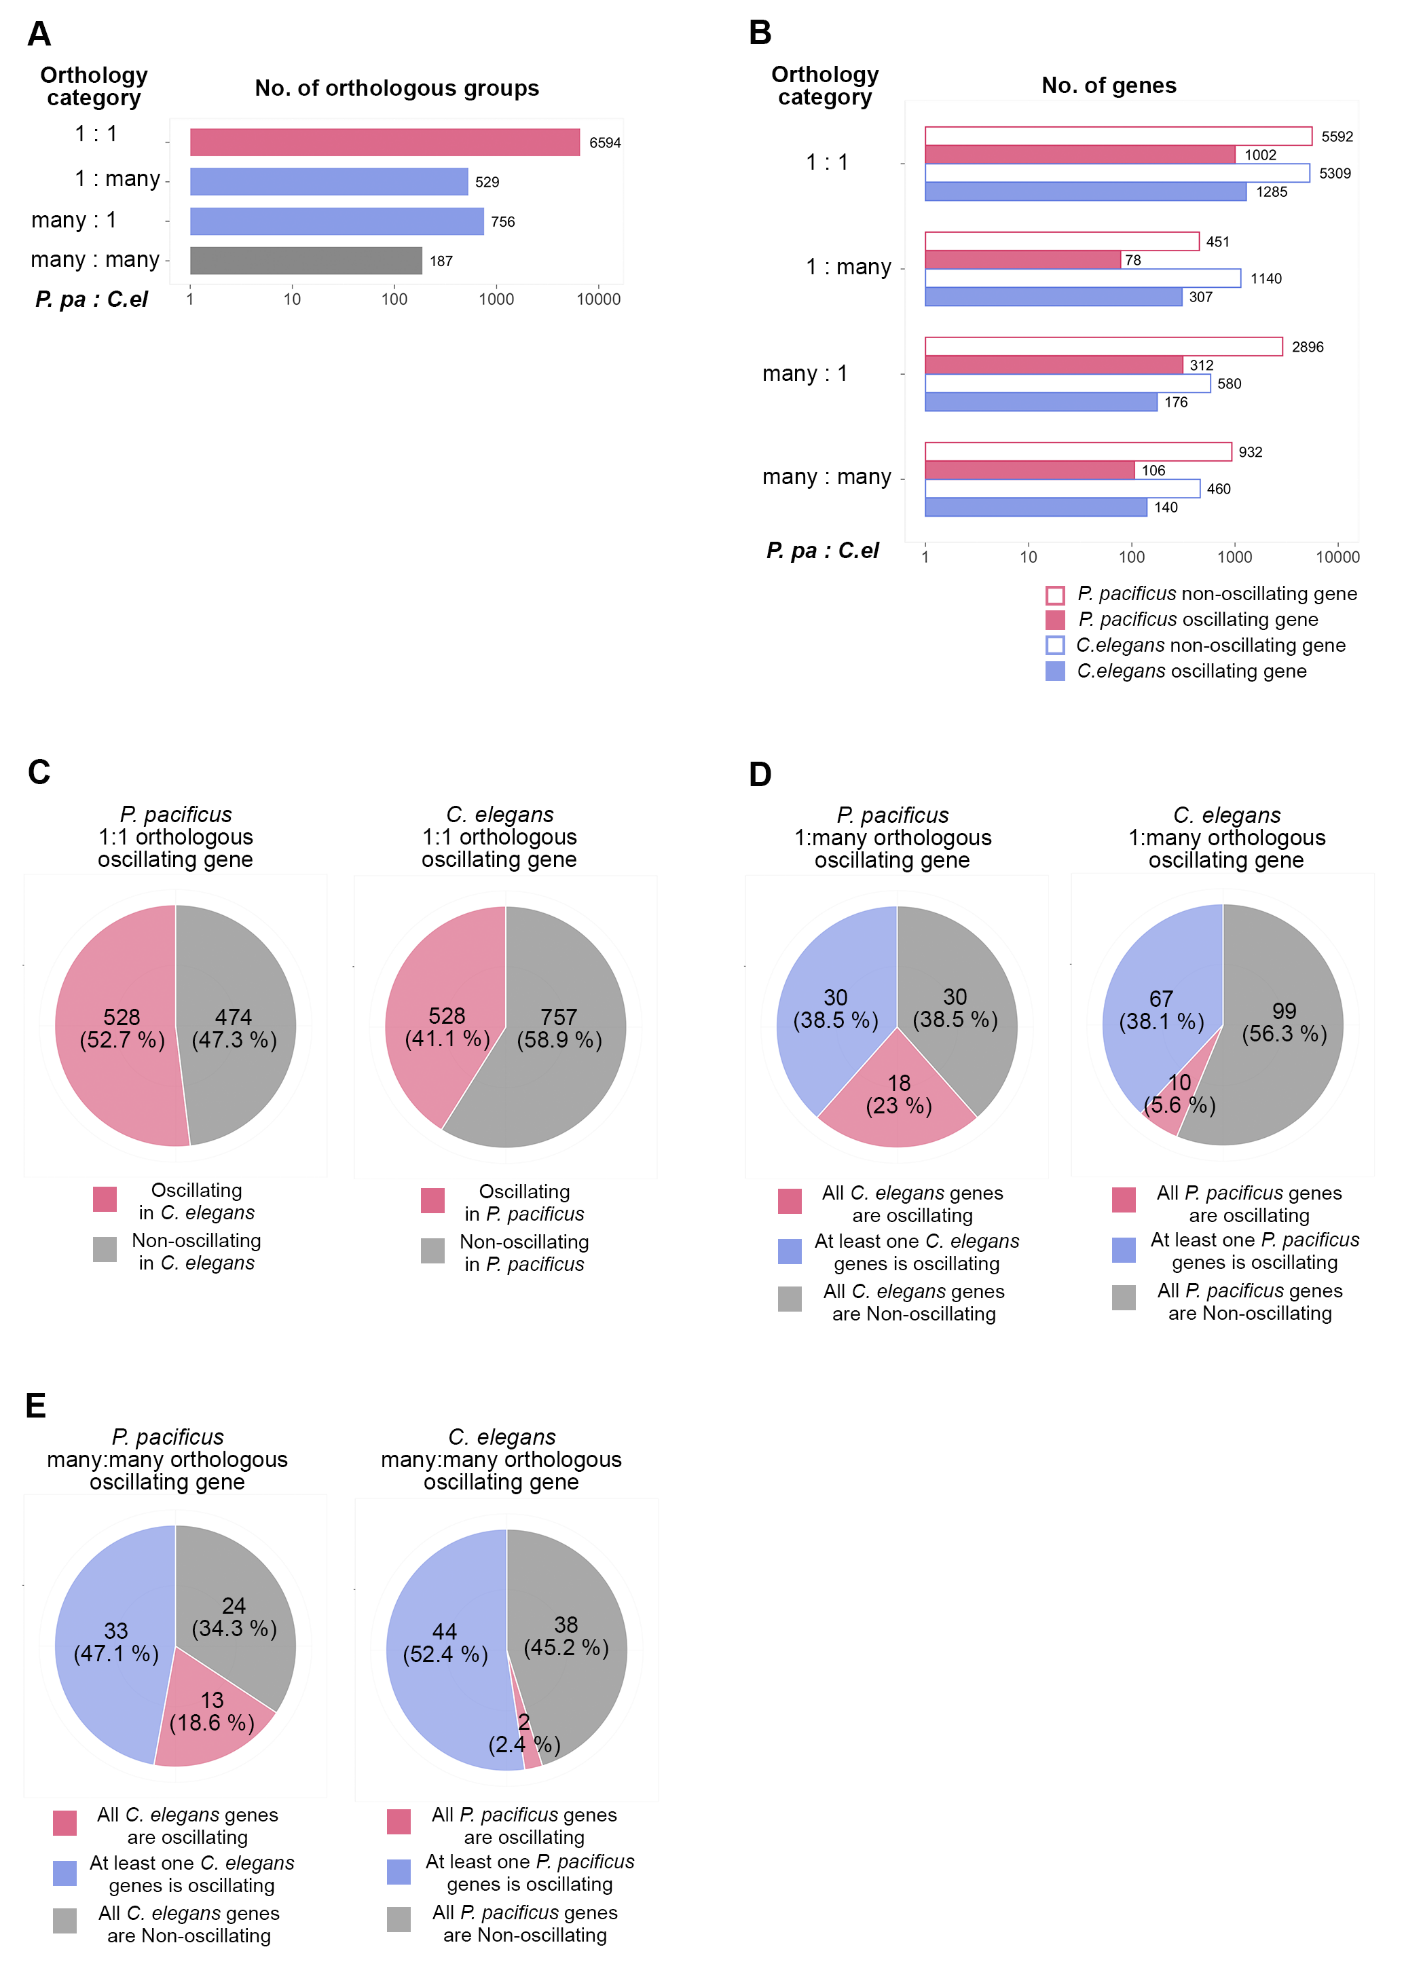


**Supplemental Figure S6. Evolution of oscillating expression of orthologous groups, related to Fig 4** (A)Four orthologous group classes were identified between *P. pacificus* and *C. elegans*. (B) The barplots show the distribution of *P. pacificus* oscillation genes (red) and *C. elegans* oscillation genes (blue) among the four orthologous group classes. (C) 469 of one-to-one orthologous groups exhibit a shared oscillatory pattern. (D) The pie charts show the degree of shared oscillation for one-to-many orthologous groups. (E) The pie charts show the degree of shared oscillation for many-to-many orthologous groups.


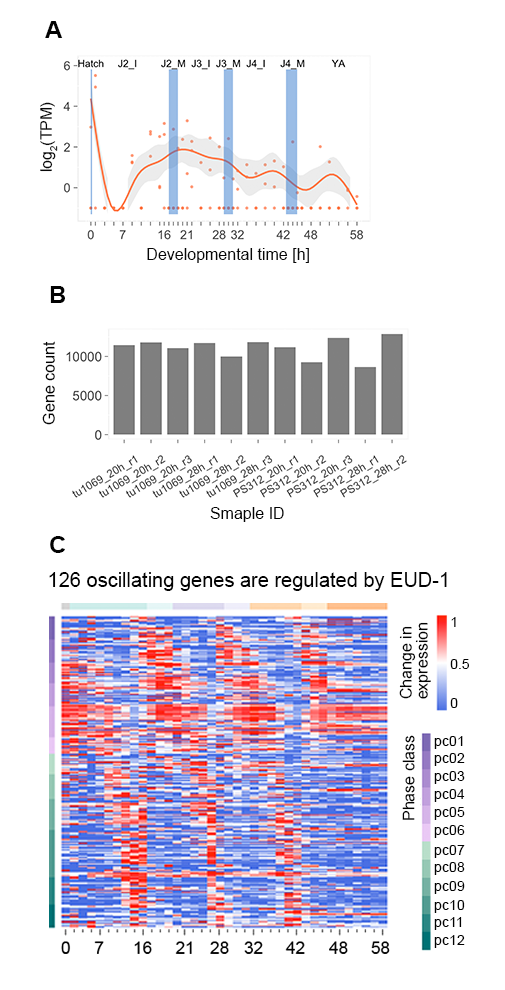


**Supplemental Figure S7. 205 oscillating genes are regulated by the *eud-1,* related to Fig 5.** (A) The dynamic expression of the *eud-1* gene during postembryonic stages. *eud-1* gene exhibited a graded expression pattern with highly expressed during late J2 and entire J3 stage rather than an oscillating pattern. (B) The bar plot shows that enough expressed genes were detected (> 8,500 expressed genes) in every sample indicating that the sequencing depth was sufficient for DEG analysis. (C) The heatmap shows the dynamic expression pattern of the 126 oscillations that are regulated by the *eud-1* locus.
