# Supplementary material for: Single worm transcriptomics identifies a developmental core network of oscillating genes with deep conservation across nematodes
Source: HighWire-hosted journal article supplement (doi:10.1101/gr.275303.121), 2021-07-22
Supplement: Supplemental_Table_S1.xlsx [file Supplemental_Table_S1.xlsx]

## Sheet: Sheet1
Supplemental Table S1 The time courses for transcriptome comparison analysis
Time course in P. pacificus								Fused time course in C. elegans Meeuse et al.							Time course in C. elegans Kim et al.
ERS_ID	Sample_ID	Time_point_ID	Substage	Strain	Temp	Hours after sychronozy (h)		SRR ID	Sample ID	Time course	Strain	Temp	Hours after sychronozy (h)		SRR ID	Strain	Temp	Hours after sychronozy (h)
ERS5595839	PS312_SWT_SUN_001	s1	Hatching	PS312	20C	0		GSM3753543	TP01	TC1	N2	25C	1		SRR941632	N2	20C	0
ERS5595840	PS312_SWT_SUN_002	s1	Hatching	PS312	20C	0		GSM3753544	TP02	TC1	N2	25C	2		SRR941633	N2	20C	2
ERS5595841	PS312_SWT_SUN_003	s1	Hatching	PS312	20C	0		GSM3753545	TP03	TC1	N2	25C	3		SRR941634	N2	20C	4
ERS5595842	PS312_SWT_SUN_004	s2	J2_interMolt	PS312	20C	1		GSM3753546	TP04	TC1	N2	25C	4		SRR941635	N2	20C	6
ERS5595843	PS312_SWT_SUN_005	s2	J2_interMolt	PS312	20C	1		GSM3753547	TP05	TC1	N2	25C	5		SRR941636	N2	20C	8
ERS5595844	PS312_SWT_SUN_006	s2	J2_interMolt	PS312	20C	1		GSM3753548	TP06	TC1	N2	25C	6		SRR941637	N2	20C	10
ERS5595845	PS312_SWT_SUN_007	s3	J2_interMolt	PS312	20C	3		GSM3753549	TP07	TC1	N2	25C	7		SRR941638	N2	20C	12
ERS5595846	PS312_SWT_SUN_008	s3	J2_interMolt	PS312	20C	3		GSM3753550	TP08	TC1	N2	25C	8		SRR941639	N2	20C	14
ERS5595847	PS312_SWT_SUN_009	s3	J2_interMolt	PS312	20C	3		GSM3753551	TP09	TC1	N2	25C	9		SRR941640	N2	20C	16
ERS5595848	PS312_SWT_SUN_010	s4	J2_interMolt	PS312	20C	5		GSM3753552	TP10	TC1	N2	25C	10		SRR941641	N2	20C	18
ERS5595849	PS312_SWT_SUN_011	s4	J2_interMolt	PS312	20C	5		GSM3753553	TP11	TC1	N2	25C	11		SRR941642	N2	20C	20
ERS5595850	PS312_SWT_SUN_012	s4	J2_interMolt	PS312	20C	5		GSM3753554	TP12	TC1	N2	25C	12		SRR941643	N2	20C	22
ERS5595851	PS312_SWT_SUN_013	s5	J2_interMolt	PS312	20C	7		GSM3753555	TP13	TC1	N2	25C	13		SRR941644	N2	20C	24
ERS5595852	PS312_SWT_SUN_014	s5	J2_interMolt	PS312	20C	7		GSM3754345	TP14	TC2	N2	25C	14		SRR941645	N2	20C	26
ERS5595853	PS312_SWT_SUN_015	s5	J2_interMolt	PS312	20C	7		GSM3754346	TP15	TC2	N2	25C	15		SRR941646	N2	20C	28
ERS5595854	PS312_SWT_SUN_016	s6	J2_interMolt	PS312	20C	9		GSM3754347	TP16	TC2	N2	25C	16		SRR941647	N2	20C	30
ERS5595855	PS312_SWT_SUN_017	s6	J2_interMolt	PS312	20C	9		GSM3754348	TP17	TC2	N2	25C	17		SRR941648	N2	20C	32
ERS5595856	PS312_SWT_SUN_018	s6	J2_interMolt	PS312	20C	9		GSM3754349	TP18	TC2	N2	25C	18		SRR941649	N2	20C	34
ERS5595857	PS312_SWT_SUN_019	s7	J2_interMolt	PS312	20C	11		GSM3754350	TP19	TC2	N2	25C	19		SRR941650	N2	20C	36
ERS5595858	PS312_SWT_SUN_020	s7	J2_interMolt	PS312	20C	11		GSM3754351	TP20	TC2	N2	25C	20		SRR941651	N2	20C	38
ERS5595859	PS312_SWT_SUN_021	s7	J2_interMolt	PS312	20C	11		GSM3754352	TP21	TC2	N2	25C	21		SRR941697	N2	20C	38
ERS5595860	PS312_SWT_SUN_022	s8	J2_interMolt	PS312	20C	13		GSM3754353	TP22	TC2	N2	25C	22		SRR941698	N2	20C	40
ERS5595861	PS312_SWT_SUN_023	s8	J2_interMolt	PS312	20C	13		GSM3754354	TP23	TC2	N2	25C	23		SRR941699	N2	20C	42
ERS5595862	PS312_SWT_SUN_024	s8	J2_interMolt	PS312	20C	13		GSM3754355	TP24	TC2	N2	25C	24		SRR941700	N2	20C	44
ERS5595863	PS312_SWT_SUN_025	s9	J2_interMolt	PS312	20C	15		GSM3754356	TP25	TC2	N2	25C	25		SRR941701	N2	20C	46
ERS5595864	PS312_SWT_SUN_026	s9	J2_interMolt	PS312	20C	15		GSM3754357	TP26	TC2	N2	25C	26		SRR941702	N2	20C	48
ERS5595865	PS312_SWT_SUN_027	s9	J2_interMolt	PS312	20C	15		GSM3754358	TP27	TC2	N2	25C	27
ERS5595866	PS312_SWT_SUN_028	s10	J2_interMolt	PS312	20C	16		GSM3754359	TP28	TC2	N2	25C	28
ERS5595867	PS312_SWT_SUN_029	s10	J2_interMolt	PS312	20C	16		GSM3754360	TP29	TC2	N2	25C	29
ERS5595868	PS312_SWT_SUN_030	s10	J2_interMolt	PS312	20C	16		GSM3754361	TP30	TC2	N2	25C	30
ERS5595869	PS312_SWT_SUN_031	s11	J2_lethargus	PS312	20C	17		GSM3754362	TP31	TC2	N2	25C	31
ERS5595870	PS312_SWT_SUN_032	s11	J2_lethargus	PS312	20C	17		GSM3754363	TP32	TC2	N2	25C	32
ERS5595871	PS312_SWT_SUN_033	s11	J2_lethargus	PS312	20C	17		GSM3754364	TP33	TC2	N2	25C	33
ERS5595872	PS312_SWT_SUN_034	s12	J2_apolysis	PS312	20C	18		GSM3754365	TP34	TC2	N2	25C	34
ERS5595873	PS312_SWT_SUN_035	s12	J2_apolysis	PS312	20C	18		GSM3754366	TP35	TC2	N2	25C	35
ERS5595874	PS312_SWT_SUN_036	s12	J2_apolysis	PS312	20C	18		GSM3754367	TP36	TC2	N2	25C	36
ERS5595875	PS312_SWT_SUN_037	s13	J2_ecdysis	PS312	20C	19		GSM3754368	TP37	TC2	N2	25C	37
ERS5595876	PS312_SWT_SUN_038	s13	J2_ecdysis	PS312	20C	19		GSM3754369	TP38	TC2	N2	25C	38
ERS5595877	PS312_SWT_SUN_039	s13	J2_ecdysis	PS312	20C	19		GSM3754370	TP39	TC2	N2	25C	39
ERS5595878	PS312_SWT_SUN_040	s14	J3_interMolt	PS312	20C	20		GSM3754371	TP40	TC2	N2	25C	40
ERS5595879	PS312_SWT_SUN_041	s14	J3_interMolt	PS312	20C	20		GSM3754372	TP41	TC2	N2	25C	41
ERS5595880	PS312_SWT_SUN_042	s14	J3_interMolt	PS312	20C	20		GSM3754373	TP42	TC2	N2	25C	42
ERS5595881	PS312_SWT_SUN_043	s15	J3_interMolt	PS312	20C	21		GSM3754374	TP43	TC2	N2	25C	43
ERS5595882	PS312_SWT_SUN_044	s15	J3_interMolt	PS312	20C	21		GSM3754375	TP44	TC2	N2	25C	44
ERS5595883	PS312_SWT_SUN_045	s15	J3_interMolt	PS312	20C	21		GSM3754376	TP45	TC2	N2	25C	45
ERS5595884	PS312_SWT_SUN_046	s16	J3_interMolt	PS312	20C	22		GSM3754377	TP46	TC2	N2	25C	46
ERS5595885	PS312_SWT_SUN_047	s16	J3_interMolt	PS312	20C	22		GSM3754378	TP47	TC2	N2	25C	47
ERS5595886	PS312_SWT_SUN_048	s16	J3_interMolt	PS312	20C	22		GSM3754379	TP48	TC2	N2	25C	48
ERS5595887	PS312_SWT_SUN_049	s17	J3_interMolt	PS312	20C	24
ERS5595888	PS312_SWT_SUN_050	s17	J3_interMolt	PS312	20C	24
ERS5595889	PS312_SWT_SUN_051	s17	J3_interMolt	PS312	20C	24
ERS5595890	PS312_SWT_SUN_052	s18	J3_interMolt	PS312	20C	26
ERS5595891	PS312_SWT_SUN_053	s18	J3_interMolt	PS312	20C	26
ERS5595892	PS312_SWT_SUN_054	s18	J3_interMolt	PS312	20C	26
ERS5595893	PS312_SWT_SUN_055	s19	J3_interMolt	PS312	20C	28
ERS5595894	PS312_SWT_SUN_056	s19	J3_interMolt	PS312	20C	28
ERS5595895	PS312_SWT_SUN_057	s19	J3_interMolt	PS312	20C	28
ERS5595896	PS312_SWT_SUN_058	s20	J3_lethargus	PS312	20C	29
ERS5595897	PS312_SWT_SUN_059	s20	J3_lethargus	PS312	20C	29
ERS5595898	PS312_SWT_SUN_060	s20	J3_lethargus	PS312	20C	29
ERS5595899	PS312_SWT_SUN_061	s21	J3_apolysis	PS312	20C	30
ERS5595900	PS312_SWT_SUN_062	s21	J3_apolysis	PS312	20C	30
ERS5595901	PS312_SWT_SUN_063	s21	J3_apolysis	PS312	20C	30
ERS5595902	PS312_SWT_SUN_064	s22	J3_ecdysis	PS312	20C	31
ERS5595903	PS312_SWT_SUN_065	s22	J3_ecdysis	PS312	20C	31
ERS5595904	PS312_SWT_SUN_066	s22	J3_ecdysis	PS312	20C	31
ERS5595905	PS312_SWT_SUN_067	s23	J4_interMolt	PS312	20C	32
ERS5595906	PS312_SWT_SUN_068	s23	J4_interMolt	PS312	20C	32
ERS5595907	PS312_SWT_SUN_069	s23	J4_interMolt	PS312	20C	32
ERS5595908	PS312_SWT_SUN_070	s24	J4_interMolt	PS312	20C	34
ERS5595909	PS312_SWT_SUN_071	s24	J4_interMolt	PS312	20C	34
ERS5595910	PS312_SWT_SUN_072	s24	J4_interMolt	PS312	20C	34
ERS5595911	PS312_SWT_SUN_073	s25	J4_interMolt	PS312	20C	36
ERS5595912	PS312_SWT_SUN_074	s25	J4_interMolt	PS312	20C	36
ERS5595913	PS312_SWT_SUN_075	s25	J4_interMolt	PS312	20C	36
ERS5595914	PS312_SWT_SUN_076	s26	J4_interMolt	PS312	20C	38
ERS5595915	PS312_SWT_SUN_077	s26	J4_interMolt	PS312	20C	38
ERS5595916	PS312_SWT_SUN_078	s26	J4_interMolt	PS312	20C	38
ERS5595917	PS312_SWT_SUN_079	s27	J4_interMolt	PS312	20C	40
ERS5595918	PS312_SWT_SUN_080	s27	J4_interMolt	PS312	20C	40
ERS5595919	PS312_SWT_SUN_081	s27	J4_interMolt	PS312	20C	40
ERS5595920	PS312_SWT_SUN_082	s28	J4_interMolt	PS312	20C	42
ERS5595921	PS312_SWT_SUN_083	s28	J4_interMolt	PS312	20C	42
ERS5595922	PS312_SWT_SUN_084	s28	J4_interMolt	PS312	20C	42
ERS5595923	PS312_SWT_SUN_085	s29	J4_lethargus	PS312	20C	43
ERS5595924	PS312_SWT_SUN_086	s29	J4_lethargus	PS312	20C	43
ERS5595925	PS312_SWT_SUN_087	s29	J4_lethargus	PS312	20C	43
ERS5595926	PS312_SWT_SUN_088	s30	J4_apolysis	PS312	20C	44
ERS5595927	PS312_SWT_SUN_089	s30	J4_apolysis	PS312	20C	44
ERS5595928	PS312_SWT_SUN_090	s30	J4_apolysis	PS312	20C	44
ERS5595929	PS312_SWT_SUN_091	s31	J4_ecdysis	PS312	20C	45
ERS5595930	PS312_SWT_SUN_092	s31	J4_ecdysis	PS312	20C	45
ERS5595931	PS312_SWT_SUN_093	s31	J4_ecdysis	PS312	20C	45
ERS5595932	PS312_SWT_SUN_094	s32	Young_adult	PS312	20C	46
ERS5595933	PS312_SWT_SUN_095	s32	Young_adult	PS312	20C	46
ERS5595934	PS312_SWT_SUN_096	s32	Young_adult	PS312	20C	46
ERS5595935	PS312_SWT_SUN_097	s33	Young_adult	PS312	20C	48
ERS5595936	PS312_SWT_SUN_098	s33	Young_adult	PS312	20C	48
ERS5595937	PS312_SWT_SUN_099	s33	Young_adult	PS312	20C	48
ERS5595938	PS312_SWT_SUN_100	s34	Young_adult	PS312	20C	50
ERS5595939	PS312_SWT_SUN_101	s34	Young_adult	PS312	20C	50
ERS5595940	PS312_SWT_SUN_102	s34	Young_adult	PS312	20C	50
ERS5595941	PS312_SWT_SUN_103	s35	Young_adult	PS312	20C	52
ERS5595942	PS312_SWT_SUN_104	s35	Young_adult	PS312	20C	52
ERS5595943	PS312_SWT_SUN_105	s35	Young_adult	PS312	20C	52
ERS5595944	PS312_SWT_SUN_106	s36	Young_adult	PS312	20C	54
ERS5595945	PS312_SWT_SUN_107	s36	Young_adult	PS312	20C	54
ERS5595946	PS312_SWT_SUN_108	s36	Young_adult	PS312	20C	54
ERS5595947	PS312_SWT_SUN_109	s37	Young_adult	PS312	20C	56
ERS5595948	PS312_SWT_SUN_110	s37	Young_adult	PS312	20C	56
ERS5595949	PS312_SWT_SUN_111	s37	Young_adult	PS312	20C	56
ERS5595950	PS312_SWT_SUN_112	s38	Young_adult	PS312	20C	58
ERS5595951	PS312_SWT_SUN_113	s38	Young_adult	PS312	20C	58
ERS5595952	PS312_SWT_SUN_114	s38	Young_adult	PS312	20C	58

## Sheet: Sheet2
SRR ID	Sample ID	Time course	Strain	Temp	Hours after sychronozy (h)
GSM3753543	TP01	TC1	N2	25C	1
GSM3753544	TP02	TC1	N2	25C	2
GSM3753545	TP03	TC1	N2	25C	3
GSM3753546	TP04	TC1	N2	25C	4
GSM3753547	TP05	TC1	N2	25C	5
GSM3753548	TP06	TC1	N2	25C	6
GSM3753549	TP07	TC1	N2	25C	7
GSM3753550	TP08	TC1	N2	25C	8
GSM3753551	TP09	TC1	N2	25C	9
GSM3753552	TP10	TC1	N2	25C	10
GSM3753553	TP11	TC1	N2	25C	11
GSM3753554	TP12	TC1	N2	25C	12
GSM3753555	TP13	TC1	N2	25C	13
GSM3754345	TP14	TC2	N2	25C	14
GSM3754346	TP15	TC2	N2	25C	15
GSM3754347	TP16	TC2	N2	25C	16
GSM3754348	TP17	TC2	N2	25C	17
GSM3754349	TP18	TC2	N2	25C	18
GSM3754350	TP19	TC2	N2	25C	19
GSM3754351	TP20	TC2	N2	25C	20
GSM3754352	TP21	TC2	N2	25C	21
GSM3754353	TP22	TC2	N2	25C	22
GSM3754354	TP23	TC2	N2	25C	23
GSM3754355	TP24	TC2	N2	25C	24
GSM3754356	TP25	TC2	N2	25C	25
GSM3754357	TP26	TC2	N2	25C	26
GSM3754358	TP27	TC2	N2	25C	27
GSM3754359	TP28	TC2	N2	25C	28
GSM3754360	TP29	TC2	N2	25C	29
GSM3754361	TP30	TC2	N2	25C	30
GSM3754362	TP31	TC2	N2	25C	31
GSM3754363	TP32	TC2	N2	25C	32
GSM3754364	TP33	TC2	N2	25C	33
GSM3754365	TP34	TC2	N2	25C	34
GSM3754366	TP35	TC2	N2	25C	35
GSM3754367	TP36	TC2	N2	25C	36
GSM3754368	TP37	TC2	N2	25C	37
GSM3754369	TP38	TC2	N2	25C	38
GSM3754370	TP39	TC2	N2	25C	39
GSM3754371	TP40	TC2	N2	25C	40
GSM3754372	TP41	TC2	N2	25C	41
GSM3754373	TP42	TC2	N2	25C	42
GSM3754374	TP43	TC2	N2	25C	43
GSM3754375	TP44	TC2	N2	25C	44
GSM3754376	TP45	TC2	N2	25C	45
GSM3754377	TP46	TC2	N2	25C	46
GSM3754378	TP47	TC2	N2	25C	47
GSM3754379	TP48	TC2	N2	25C	48

## Sheet: Sheet3
SRR ID	Strain	Temp	Hours after sychronozy (h)
SRR941632	N2	20C	0
SRR941633	N2	20C	2
SRR941634	N2	20C	4
SRR941635	N2	20C	6
SRR941636	N2	20C	8
SRR941637	N2	20C	10
SRR941638	N2	20C	12
SRR941639	N2	20C	14
SRR941640	N2	20C	16
SRR941641	N2	20C	18
SRR941642	N2	20C	20
SRR941643	N2	20C	22
SRR941644	N2	20C	24
SRR941645	N2	20C	26
SRR941646	N2	20C	28
SRR941647	N2	20C	30
SRR941648	N2	20C	32
SRR941649	N2	20C	34
SRR941650	N2	20C	36
SRR941651	N2	20C	38
SRR941697	N2	20C	38
SRR941698	N2	20C	40
SRR941699	N2	20C	42
SRR941700	N2	20C	44
SRR941701	N2	20C	46
SRR941702	N2	20C	48
