# Supplementary material for: Single worm transcriptomics identifies a developmental core network of oscillating genes with deep conservation across nematodes
Source: HighWire-hosted journal article supplement (doi:10.1101/gr.275303.121), 2021-07-22
Supplement: Supplemental_Table_S2.xlsx [file Supplemental_Table_S2.xlsx]

## Sheet: tb_reg23135_meanlog2TPM_swt05Hv
Supplemental Table S2 The mean gene expression (log2(TPM)) of the 23,135 reliably expressed genes at 38 time points in P. pacificus
ppa_locus	0h	1h	3h	5h	7h	9h	11h	13h	15h	16h	17h	18h	19h	20h	21h	22h	24h	26h	28h	29h	30h	31h	32h	34h	36h	38h	40h	42h	43h	44h	45h	46h	48h	50h	52h	54h	56h	58h
Contig0-snapTAU.110	-0.409418	-1	-1	-1	-0.99197	-1	-0.74393	-1	-0.817056	-1	-0.814612	-1	-1	-0.882641	-0.877727	-0.462633	-1	-1	-1	-0.66197	-0.756464	-0.896814	-0.670262	-1	-0.755411	-0.823045	-0.63699	-0.876906	-1	-0.950485	-0.791151	-1	-1	-0.687	-1	-0.450673	-0.895347	-0.850441
Contig0-snapTAU.189	0.617113	-1	-1	-1	-1	-1	-1	0.487759	-1	1.15207	-1	0.506993	-1	0.0908132	-1	-1	-1	-1	-0.243231	0.0495016	0.320701	-0.60177	-1	-1	0.244069	-0.557262	-1	-1	-0.022507	0.122338	0.213751	-0.576816	-1	-1	-1	-1	-1	-0.721644
Contig0-snapTAU.536	-1	-1	-1	-1	-1	-1	-1	-1	-1	-1	-1	-1	-1	-1	-1	-1	-1	-1	-1	-1	-1	-0.819986	-1	-0.765513	-1	-1	-1	-1	-0.570325	-0.392068	-0.320995	0.0896861	-0.668763	0.395762	-1	-1	-0.349173	-0.310034
Contig0-snapTAU.558	-1	-1	-1	-1	-1	-0.0532616	-1	-1	0.109716	-1	-1	-1	-0.768037	-1	-0.93899	-1	-1	-1	-0.828331	-1	-1	-1	-1	-1	-1	-1	-1	-1	-1	-1	-1	-1	-1	-1	-1	-1	-1	-1
Contig0-snapTAU.563	-1	-1	-1	-1	-1	-1	-1	-1	-1	-1	0.972704	-0.0770263	1.74673	0.940861	-1	-1	-1	-1	-1	-0.398708	-1	-1	-1	-1	-1	-1	-1	-1	-1	0.60351	-1	-1	0.564621	-1	-1	-1	-0.927134	-1
Contig0-snapTAU.622	-1	-1	-1	-1	-1	-1	-1	-1	0.888389	-1	-1	-1	-1	0.756834	-1	0.270301	-1	-1	-1	-1	-1	-0.605642	0.179774	-1	0.426992	0.860804	-0.422502	0.428824	-0.364825	0.292466	-0.289802	-0.360095	0.421747	-1	-1	1.01056	1.27307	0.646775
Contig0-snapTAU.703	2.05177	2.47966	0.722048	2.18925	0.898012	1.88115	2.02018	2.07589	1.29504	1.2456	1.73617	1.29621	1.48164	1.65732	1.40887	0.966157	1.27636	1.31375	0.96532	1.61137	1.35956	1.07553	1.31044	0.873315	0.701972	0.334378	0.252693	0.407758	0.892438	-0.508866	0.295722	-0.251648	0.963098	1.42573	2.28864	-0.180349	1.36609	0.927607
Contig0-snapTAU.718	0.972518	0.653944	1.39869	1.25777	-0.414792	-0.127024	-0.214779	-0.519797	-0.173933	0.45463	0.0467953	-0.131805	1.14325	0.0015034	0.369965	0.727761	0.00340726	-0.176439	-0.833931	-0.10638	0.673989	-0.725799	-1	-0.101369	-0.229086	-1	-0.822632	-0.770289	-0.549829	-0.771671	-0.711764	-0.422814	-0.0269073	-0.415686	-0.103973	-0.43938	-0.193914	-0.429466
Contig0-snapTAU.796	-1	-1	-1	-1	0.950907	-0.390508	-1	0.220751	-0.226588	0.847728	-0.139746	0.227382	-0.299408	-0.278004	-0.183551	0.456045	0.0571209	-0.614787	-0.544651	0.479461	-0.708813	0.556388	-1	-1	-1	-0.429992	-0.516441	-0.519682	-1	-0.665162	-0.145205	-1	-0.276669	-1	-1	-1	-0.943899	-1
Contig0-snapTAU.797	-1	-1	-1	-1	-1	-1	-1	-0.546867	-1	-1	-1	-0.786631	0.18523	-1	-0.64727	-0.215615	-0.706892	-0.510694	-0.792273	-1	-0.673429	-0.854097	-0.106149	-0.577841	-1	-1	0.0961688	-1	-1	-1	-1	-1	-1	-1	-1	-1	-1	-0.316711
Contig0-snapTAU.798	-1	1.77303	-1	-1	-1	-1	-1	-1	0.484356	-1	-1	-1	-1	-1	-0.0946356	-1	-1	-1	-1	-1	1.48496	0.087492	-1	-1	-1	-1	-1	-0.164708	-1	-1	-1	-0.173154	-1	-1	-1	-1	-1	-1
Contig1-snapTAU.193	0.995543	0.933272	1.78075	1.42762	1.42806	0.786861	1.19247	1.42712	1.65758	1.87461	0.979641	0.694894	1.26865	0.735149	2.06869	1.10969	0.58081	1.19994	0.102423	0.741125	0.850662	0.372552	0.457875	0.332164	0.757373	0.40502	0.603932	0.648899	0.570889	0.161789	0.736018	0.252813	1.12728	1.09111	0.724638	0.49396	1.35316	1.24997
Contig1-snapTAU.376	-1	-1	-1	-1	-0.923263	0.168538	0.101682	1.19652	0.143892	1.15694	0.0734413	0.290912	0.574561	0.981913	2.69895	0.61891	1.0408	0.35362	-0.00163981	0.766208	1.07355	0.870825	-0.1215	-0.117524	0.791113	0.619451	0.5818	0.78485	0.700795	0.388498	1.58088	1.24252	1.59414	1.35919	0.550732	0.0696933	1.32941	1.28859
Contig1-snapTAU.41	3.39854	3.16421	5.07482	2.50808	3.8926	2.2646	3.01273	2.55141	3.23056	4.89423	1.61236	2.13425	2.66216	2.1082	3.67462	2.97519	2.51612	2.68968	3.20797	2.48374	3.07414	1.91582	1.68898	1.33073	1.91375	1.6871	1.7932	1.31072	1.45663	0.229838	1.50059	0.994472	0.939023	1.14065	2.79187	0.139705	0.997189	0.395994
Contig1-snapTAU.555	1.54822	1.38434	1.0044	1.59242	1.5334	1.86993	1.63664	1.93544	2.59635	1.95359	2.45021	2.10684	2.61696	2.7939	2.04699	1.90012	1.55608	2.05478	1.44677	2.31102	1.75495	0.828802	1.96461	0.676393	0.725931	0.519798	0.629302	0.499894	2.09488	0.0514369	1.13706	0.105973	0.147009	-0.227266	-0.467348	-0.0375199	-0.194818	-0.0478478
Contig1-snapTAU.556	1.11527	1.29847	0.366318	1.25648	1.41237	0.626923	1.69731	1.5587	2.37918	2.07876	2.20347	1.62445	2.41892	2.21176	1.38674	1.80278	2.23165	1.84009	2.33188	2.96202	2.33436	1.1024	2.22283	0.63864	0.91413	0.773776	1.38441	1.12604	2.28559	1.57917	1.53673	1.11421	0.662705	1.31603	-0.28532	-0.638307	-0.0507772	-0.341403
Contig1-snapTAU.557	0.0804761	-1	-1	-0.466058	-1	-0.733906	-0.509391	-0.368737	0.0304958	-0.321815	-0.243849	0.196127	0.256748	0.560605	0.00739407	-1	-1	0.151279	-0.768751	-0.390641	-0.3531	-0.799854	-0.187456	-0.467216	0.395388	0.777101	0.471139	-0.122112	-0.449898	-0.251675	-0.264274	-0.690889	0.156615	-0.458142	-1	0.00909117	0.0456639	-0.45734
Contig10-snap.103	2.11003	1.53542	0.954951	0.791145	0.145057	0.145915	-0.516226	0.881017	-1	0.16813	0.0814667	-0.539285	0.557106	-0.574395	-0.596797	0.696761	-0.309809	0.727068	-1	-1	0.534577	-0.464328	-0.196896	-0.80014	-0.448407	-0.678696	0.469476	-0.769977	-0.571441	0.235166	-0.200776	-0.601128	-0.3439	1.9804	-0.644731	-1	-0.365157	-0.231966
Contig10-snap.215	1.57405	2.01365	-1	0.00707194	0.34514	-0.632124	-0.84084	-1	-0.228751	-0.0677936	-0.109178	-0.39901	-0.531049	-1	-1	-0.460506	4.44833	-1	-1	-1	-0.575633	-0.585705	-1	-0.561512	-1	-0.673973	-1	-1	-1	-0.160378	-0.363988	0.961269	0.350693	0.76072	-0.240315	-0.184424	-0.830535	-0.511281
Contig10-snap.216	-1	1.83591	-1	-1	-1	-0.25711	-1	-1	-1	-1	-1	-1	-0.0845213	-1	-1	-1	-1	-1	-1	-1	-1	-1	-1	-1	-1	-1	-1	-1	-1	-1	-1	-1	-1	-1	-1	-1	-1	-1
Contig10-snapTAU.135	-1	-1	-1	-1	-1	-1	-1	-1	-1	-1	-1	0.790737	-1	-1	1.23633	-1	-1	-1	-1	-1	1.84065	-0.193798	0.785464	-0.00651251	-1	0.186719	-1	-1	-1	-1	1.48465	-0.268429	-1	-1	-1	-1	-1	0.0771017
Contig10-snapTAU.136	0.215307	-1	-1	1.41096	1.39857	0.786411	1.74282	0.31673	2.57368	-1	0.376583	0.0527033	0.440882	0.915757	0.105047	0.989529	2.18525	-0.450985	1.63191	0.559354	0.668038	0.016534	-0.345087	1.87069	0.622916	-0.402259	-0.202088	1.36152	-0.417259	-0.630169	0.892278	0.469847	1.12392	0.330999	-1	-1	-0.305548	-0.387721
Contig10-snapTAU.145	2.08659	2.82189	4.9355	2.00379	1.51789	2.44839	2.22224	1.57672	2.26951	2.01508	3.69796	1.53108	3.28018	2.73311	3.2859	3.58528	2.51393	2.43288	2.80912	3.3517	3.62402	2.87071	2.04589	2.63415	3.44982	2.76098	-0.245584	0.901158	1.45104	1.64822	2.28929	1.2889	1.97348	2.18391	1.45271	2.57821	1.91408	1.32655
Contig10-snapTAU.234	3.02669	4.95755	-1	-1	0.766982	0.694428	-0.064592	0.743002	2.48679	3.27903	3.38438	2.46277	2.71204	1.59482	2.29307	-1	0.477026	0.792938	2.34447	2.74197	2.5916	1.87959	1.94061	2.26902	1.00772	-0.00262755	0.809954	-0.314277	3.93841	1.54506	1.85123	0.502413	1.77375	-1	0.0257045	-1	-0.226089	0.446157
Contig10-snapTAU.360	5.96352	7.54702	4.30871	5.62077	7.73799	8.29134	9.71576	7.04518	7.54922	6.56464	7.80071	7.14551	5.26914	7.61671	5.64164	5.85732	7.07326	5.53235	5.75922	5.8525	6.17131	5.32844	5.47683	6.26773	6.08123	6.01837	4.77337	5.55553	5.38947	5.7488	4.13531	4.99318	7.14384	8.47627	7.17933	4.87361	7.18983	5.80569
Contig10-snapTAU.37	-1	-1	-1	-1	-0.721495	-0.883467	-0.74346	-0.824255	-0.729087	-0.672514	-1	-0.906916	-0.937645	-0.96983	-0.9176	-0.921307	-1	-0.936958	-0.920105	-0.947541	-0.834135	-0.951363	-0.878264	-0.951597	-0.950093	-0.965162	-1	-0.943747	-0.956723	-1	-0.94269	-1	-1	-1	-1	-1	-0.994363	-1
Contig10-snapTAU.441	4.73274	7.40449	-1	6.45765	7.09435	1.71528	7.98707	4.72331	4.42424	5.90517	5.25076	4.19785	-1	1.98803	3.49411	3.2856	4.97012	5.37287	5.93458	3.03926	5.64526	3.29713	3.74232	4.7659	5.1482	4.87283	3.6329	3.73477	3.09009	3.378	4.73396	3.54865	6.13339	4.16296	-1	6.07538	1.84366	4.24708
Contig10-snapTAU.486	3.59342	2.2151	2.82368	-1	-0.341251	1.28189	0.109271	0.139206	-0.556731	0.171802	2.54879	3.74352	4.03696	1.10854	-0.327328	-0.580277	-1	-1	0.5359	1.63886	2.34189	2.09857	1.20832	-1	-1	-1	-0.791697	-1	1.60611	3.75204	4.05167	-0.320509	0.129862	-0.569887	-1	-1	-0.718191	-1
Contig10-snapTAU.71	1.69005	-1	1.23401	-1	0.0305541	0.915622	-1	0.0921854	-1	-1	-1	0.0865227	1.87829	1.43404	2.26201	1.26857	1.36275	0.778881	3.82882	-0.492176	-0.780787	-0.318333	1.46091	0.391057	-0.418898	0.195678	-0.660002	-0.768284	3.02331	0.82584	0.0240372	-0.632813	-0.323452	-0.276695	-0.216437	-1	-0.267661	-0.032965
Contig100-snap.84	3.68466	5.04496	5.32403	4.55495	3.75032	3.45196	3.4797	3.72211	3.7797	3.42579	3.40755	3.23535	3.0888	4.03998	4.63587	4.36553	3.71599	3.55905	3.26391	3.2566	4.13961	3.1598	3.14709	3.69715	3.78101	3.05403	2.38296	3.46498	2.7915	2.93941	2.66823	3.37059	3.86408	3.68586	4.6198	3.45419	4.28081	4.19102
Contig102-snapTAU.77	-1	-1	-1	-1	-1	-1	-1	-0.734926	-1	-1	-1	0.136486	-1	-1	-1	-1	-1	-1	-1	-1	-1	-1	-1	-1	-1	-1	-1	-1	-1	-1	-1	-1	-1	-1	-1	-1	-1	-1
Contig102-snapTAU.78	-1	-1	-1	-1	-1	-1	-1	-1	-1	-1	-1	-1	-1	-0.415671	-1	-1	-1	-1	-1	-1	-1	-1	-1	-1	-1	-1	-0.967943	-1	-1	-1	-0.936396	-0.731779	-1	-0.848583	-0.843439	-0.672541	-0.688547	-1
Contig102-snapTAU.84	2.77743	2.51917	3.67117	-1	3.13507	1.83437	2.14754	2.69546	2.63518	2.83136	2.82074	1.62388	2.52542	2.25339	2.49854	3.69145	3.16345	3.59809	1.64657	1.93112	2.19228	1.62322	2.03855	2.84745	3.10578	2.69325	1.83188	2.65329	1.75555	1.24095	2.77761	2.52777	3.60514	3.66058	4.02943	3.46812	3.1473	4.03368
Contig103-snapTAU.33	5.79835	7.38641	7.82017	7.31493	7.2509	6.95884	7.56726	8.1506	8.42847	7.96273	7.1187	7.1903	7.44399	8.54322	7.17783	8.09165	6.97855	7.43465	7.10918	7.29717	7.64481	7.67264	7.38494	7.93875	8.05068	7.39832	6.77374	8.17845	7.78736	7.57509	7.74438	7.93334	8.93423	8.96492	8.05416	8.16217	9.22176	9.16792
Contig103-snapTAU.35	2.02852	3.7519	2.04231	1.54483	2.75105	2.26172	2.64082	3.06521	3.35744	2.62429	3.47693	1.85182	2.27823	3.38269	2.00637	3.7092	2.47352	2.82437	1.59921	2.19126	2.60591	2.848	2.75425	2.30856	2.77534	2.3346	2.57015	3.2031	3.12526	3.12641	3.02813	3.18978	3.78842	3.37186	2.99334	2.66052	4.2983	4.04051
Contig103-snapTAU.36	4.26314	4.67101	5.09507	3.97992	4.39198	3.64888	3.69611	4.66312	4.6795	4.68624	3.4946	3.36011	3.59658	4.33397	3.33463	4.14388	3.96836	4.12298	3.33599	3.28962	4.04856	3.8393	4.17886	4.98399	4.60095	4.73517	4.52064	4.98827	4.60084	5.02965	4.83455	5.66642	5.5275	5.73528	5.17245	6.06588	6.08666	6.53903
Contig103-snapTAU.62	-1	-1	-1	-1	-1	-1	-1	-1	0.705477	-1	-1	-1	-1	-1	-1	-1	-1	-1	-1	-1	-1	-0.205699	-1	-1	-1	-0.422371	-1	-1	-1	-0.768714	0.503055	-0.0756497	-1	-1	-1	-1	-0.816975	-1
Contig103-snapTAU.7	2.08942	-1	-1	1.96605	1.43132	0.239253	-0.613	1.95215	0.10194	1.38652	-0.556136	0.357441	0.724771	0.542692	-1	0.656483	1.21349	-0.166635	-0.0463492	1.07894	2.16948	1.26334	0.281593	1.3821	1.82214	1.97356	0.647113	1.85337	1.51259	2.57898	1.7718	1.73094	2.47266	2.55562	2.37144	3.02335	2.65246	2.95527
Contig104-snapTAU.72	0.357934	2.70254	-1	-1	-1	-1	-1	-1	-1	-1	-1	-0.0509084	-1	-1	-1	-1	-1	-1	-1	-1	-1	-0.639834	0.693807	-1	-1	-1	-1	-1	0.338766	-1	-1	-1	-0.5166	0.29	-1	-1	-1	-1
Contig104-snapTAU.73	2.61674	2.60474	4.62829	0.210101	1.79558	0.811797	0.884053	0.426547	2.24318	1.72452	3.26549	2.61408	2.05382	2.28706	2.8637	2.06124	0.403686	1.54862	1.78823	1.96372	0.273425	1.43207	1.84618	1.41685	1.4054	1.66298	-0.350582	0.336614	1.846	1.79999	2.13493	2.18091	1.69017	1.64332	0.490924	0.986771	0.826196	1.64335
Contig104-snapTAU.98	-1	-1	-1	-1	-1	-1	-1	1.41395	-0.0107253	-1	2.17924	-0.387266	-1	-1	0.197436	-1	-0.225688	-1	-1	0.452324	-1	0.818247	-1	-1	-1	-1	-1	-1	-1	-1	-1	-1	-1	-1	-1	-1	-1	-1
Contig106-snapTAU.42	-1	-1	-1	-1	-1	0.059164	-1	-1	-1	-1	-1	-1	-0.0379453	-1	-0.0112871	0.423779	-1	-0.218769	-1	-1	-1	-1	-1	-0.713856	-1	-1	-1	-0.624365	-1	-1	-1	-0.403335	-1	0.123553	-1	-1	-1	0.266481
Contig11-snap.31	3.82902	4.06874	3.63723	0.0195546	2.55792	1.47221	1.68212	2.4371	2.44837	2.1705	2.14132	3.11325	2.53752	2.94435	2.68003	1.27084	0.823379	1.70315	0.912941	1.81939	1.55111	1.88613	1.59225	1.89027	1.75632	0.708917	0.810679	0.114868	1.92736	1.80535	2.02496	1.20486	1.5696	0.410972	-0.229994	-0.173716	0.626322	0.522334
Contig11-snapTAU.103	-1	5.33589	-1	-1	-1	1.51995	0.0459026	-1	6.45754	6.54063	3.91801	2.63142	3.39089	-1	1.6082	-1	-1	2.84786	5.97125	4.19015	0.712827	1.66929	0.609757	0.234974	2.09708	-1	4.18376	6.35821	4.97484	2.56988	0.938865	-1	1.08145	1.97129	6.98516	-1	1.68176	1.82617
Contig11-snapTAU.104	-1	-1	-1	-1	3.27185	-1	-1	-1	-0.791384	1.05333	0.510401	-0.235071	-0.00859604	-0.276712	-1	-1	-1	-1	-0.0627679	0.332227	-1	-0.632983	-1	-0.92165	-0.553818	-0.403121	1.82944	2.5231	1.86543	2.75494	3.24495	3.22547	3.42192	3.52726	1.06647	1.24615	1.18002	-0.0873733
Contig11-snapTAU.191	1.03312	1.22445	-0.151511	-1	1.09508	-0.0453629	2.05124	0.888914	2.26451	2.13098	2.41832	2.07238	2.85412	1.20349	0.180863	2.69201	0.883197	1.79114	1.72136	1.69599	1.6191	1.97858	0.657273	1.25994	1.80673	1.85432	-0.514805	0.909991	0.584635	2.17531	1.53485	1.33717	1.34179	1.2368	0.305992	1.89708	0.555875	0.640452
Contig11-snapTAU.274	2.2059	2.80296	3.25967	3.61065	2.63874	2.79427	2.30227	2.54535	3.02432	2.7274	2.56717	2.17589	3.131	2.93084	3.7978	3.11892	2.63935	2.67039	2.28165	2.57888	2.36087	2.72427	2.03528	2.97296	2.61409	2.7233	2.26396	3.24329	3.19189	3.40177	3.00655	3.44458	3.44528	3.43139	3.30179	3.48591	4.1543	4.34833
Contig11-snapTAU.415	1.45667	-1	-1	0.154926	0.954243	0.357748	1.92364	2.14765	0.535166	2.18386	0.621113	1.38107	1.87617	1.21494	4.90679	2.63232	2.06032	2.16826	1.57359	2.18425	3.15852	3.73642	1.86561	2.50887	2.71473	2.63952	2.27119	3.95115	2.83691	3.41927	3.00584	4.53363	4.64868	4.61394	3.83017	2.31013	4.62622	4.42027
Contig11-snapTAU.497	0.91581	1.9234	2.79025	0.555748	0.315366	-0.00750113	-0.102649	0.642384	0.460969	-1	1.25633	0.47754	1.32715	0.147063	2.44425	1.65335	0.291918	1.72993	1.36201	0.822163	0.817793	0.455322	-0.198671	0.601908	1.01737	0.837082	-0.476901	0.357478	0.109261	1.47325	0.508537	0.747691	0.499166	0.211693	-1	0.968336	-0.0145964	0.398122
Contig11-snapTAU.50	3.38123	-1	-1	0.863442	0.987257	0.291825	1.46331	0.430604	1.65447	1.79809	0.69298	-0.35296	0.997012	0.198667	1.34167	-0.143187	-0.20852	0.0941053	-0.675122	-0.522687	0.406903	-0.103636	-0.071568	-0.250126	-0.032018	-1	-1	-1	-0.272341	-1	-1	-1	-1	-0.302103	0.959096	-1	0.207076	-0.245233
Contig11-snapTAU.517	2.26399	3.04852	4.38795	2.95998	1.41939	1.87797	2.20639	1.95935	2.36017	2.24655	1.75724	1.61639	2.00633	2.82456	3.7085	2.87128	1.87264	2.03964	0.873102	2.16156	2.20792	1.85365	1.05248	1.56174	1.51712	1.62602	1.17791	1.06075	1.07587	0.816557	1.5692	2.054	1.79981	1.75297	1.39481	1.7843	1.30434	2.136
Contig11-snapTAU.521	3.52729	5.1417	4.96188	3.51934	2.51328	2.45529	2.89444	3.41261	3.36361	3.72675	3.57273	3.13378	3.43789	3.61849	4.40439	4.28608	4.7228	3.93366	3.47172	3.84576	4.16225	2.77476	3.47379	3.54347	3.43096	3.09661	2.36779	2.5258	2.04553	2.56988	2.41341	3.06082	2.788	2.95015	1.65131	3.65177	2.42493	2.88767
Contig11-snapTAU.525	3.90747	4.92649	5.40293	3.0512	2.61446	2.83044	3.99247	3.65955	3.911	3.15394	3.72618	2.88828	3.58284	4.08099	4.81159	4.2238	3.60375	3.344	3.76131	3.85577	4.12493	3.31869	2.93256	3.48215	3.49753	3.58315	3.27053	3.66561	3.49845	3.58431	3.25625	3.76857	3.76116	4.29402	5.32617	2.84158	4.03096	4.32703
Contig11-snapTAU.526	3.00339	2.06761	2.07608	1.33133	1.82165	1.66649	2.42683	2.13126	2.04584	2.21766	2.32734	2.1902	1.71371	1.05643	1.05065	2.00376	1.65687	1.67532	2.05542	1.55121	1.23528	2.04463	0.518099	-0.18922	0.35819	-0.0483016	-0.457311	0.751373	0.924895	0.71203	0.669645	0.920891	1.25543	1.94887	1.48917	0.912695	1.88091	1.9476
Contig11-snapTAU.554	1.47182	2.7891	2.11233	5.41685	3.81938	1.48435	2.40979	2.24028	3.20301	2.75721	1.49347	2.49127	2.47532	2.04111	2.02115	2.62595	1.75446	1.61308	1.61576	2.83281	3.12434	2.2472	1.76054	1.70238	1.79249	1.88895	1.58978	2.59032	2.29606	2.85267	2.22508	1.98452	3.13964	3.38901	2.18421	1.74249	3.48003	3.42208
Contig11-snapTAU.85	-1	1.92135	1.02207	-1	-0.977694	0.622971	1.78139	1.17491	0.692937	2.45697	-1	0.172017	0.805165	0.618756	-0.145993	-0.366992	0.983397	0.816609	0.592744	0.0372992	1.45256	0.120165	-0.192099	0.898132	0.876577	0.627011	0.220599	0.941641	0.685352	0.137432	0.933191	0.0191017	0.579913	-0.136627	0.790706	1.27866	1.27799	1.07466
Contig110-snapTAU.45	2.19599	-1	3.19502	-1	-0.948303	0.0379882	2.40449	1.1925	3.14562	-1	-1	1.93677	2.89902	1.69232	-1	-1	2.01576	-1	-1	2.33935	-1	-1	-1	-1	-1	-0.340404	0.0270192	-1	1.47408	-1	-1	-0.191781	0.457979	0.993541	-1	0.984613	-0.423015	-1
Contig110-snapTAU.48	2.90726	3.49276	4.26402	3.43512	2.28649	2.32155	1.65101	2.86883	2.84289	2.74511	2.7425	2.12482	2.70657	2.55474	3.20137	3.53433	2.16927	2.15789	2.0311	2.21482	3.17123	2.40477	2.18586	2.93542	2.88939	1.98556	2.23088	2.19942	2.09357	2.29219	2.46861	1.85701	2.85281	2.89242	2.33121	1.84387	2.48448	2.94281
Contig112-snapTAU.8	10.1467	10.9374	12.2703	13.4704	10.6095	10.5323	11.0178	11.01	11.1213	11.8729	11.4916	10.6521	11.4628	11.5099	11.3478	11.6671	11.4221	11.3149	11.3274	11.7644	11.3303	10.6806	10.7266	11.5876	11.8384	11.7872	11.301	11.3518	10.4607	10.5688	10.7108	10.4524	11.3342	11.5758	11.5539	11.9299	11.153	11.4746
Contig113-snapTAU.29	-1	-1	-1	0.479248	-1	-1	-1	-1	-1	-1	1.01032	-1	1.32636	1.58394	-1	-1	-1	-1	-1	-1	-1	-1	-1	-1	-1	-1	-1	0.88259	-1	1.63363	0.0474365	1.30599	-1	-1	-1	-1	-0.546932	-1
Contig113-snapTAU.52	1.67581	-1	-1	2.82143	-1	-1	-0.861105	-1	0.194357	-0.5216	-1	-1	-0.584171	-1	-0.842424	0.909628	-0.0129991	0.00551144	-1	-0.300834	-1	-1	-1	-1	-0.00641304	-1	-1	-1	-0.862829	-1	-1	0.0298006	-1	-1	-1	-1	-0.899655	-1
Contig113-snapTAU.77_curated	3.45678	3.1164	2.08359	-1	0.990432	-0.286219	-0.570944	1.59945	0.968303	-1	-1	0.223758	-1	2.14713	-0.244558	-1	-1	-1	0.547542	-0.118773	1.60367	-1	-1	-1	-1	-1	-1	-0.691329	0.0308277	-1	-0.352412	-0.135819	-1	-0.263966	-1	-1	-0.885963	-1
Contig116-snapTAU.58	1.68435	1.02391	-1	-1	0.688734	-0.0248939	-1	-1	-0.218125	-1	-1	-1	-0.104508	-1	-0.419837	-1	-1	-1	-1	-1	0.336939	-1	0.0268885	-1	-1	-0.351203	-1	-1	-1	-1	-0.604548	-1	-1	-1	-1	-1	-0.956212	-0.787484
Contig118-snapTAU.1	0.345368	-1	3.33249	-1	-1	-1	-1	-1	-1	-1	-1	-1	-1	-0.692654	-1	-1	-1	-1	-1	-1	-1	-1	-1	-0.751923	-1	-1	-1	-1	-1	-1	-1	-1	-0.164397	0.58424	-1	-1	0.157389	-0.483284
Contig12-snap.49	0.456498	2.19493	2.71294	0.910409	1.36248	1.08459	0.171419	1.51193	1.31392	0.982718	0.248372	0.474899	0.304994	0.790598	0.535966	0.724561	0.571929	-0.27407	0.552665	-0.0060979	1.26617	0.174359	0.215805	0.0864502	0.17222	-0.276915	-0.271827	-0.323238	-0.15278	-0.664753	-0.267719	-1	-0.67444	-0.788613	-0.695965	-1	-0.786602	-0.82007
Contig12-snapTAU.108	2.97158	2.30594	3.41845	2.92356	2.24027	1.23946	1.73097	1.82179	2.09745	2.34279	1.37848	1.97569	0.978129	1.40198	1.15335	1.72319	1.19082	1.14811	-0.271495	0.213803	0.531838	0.00889667	0.302771	-0.150945	0.479916	-0.0445963	-0.680132	-0.538284	-0.129861	-0.369172	-0.811456	-0.422367	-0.134639	-0.262725	0.33949	-1	-0.503357	-0.469128
Contig12-snapTAU.110	-1	-1	-1	-1	-1	-1	-1	0.7087	0.615427	-1	-1	-1	-0.364345	-1	-1	-1	-1	0.526064	-1	-1	-1	-1	-1	-1	-1	-1	-1	-1	-1	-1	-1	-1	-1	-1	-1	-1	-1	-1
Contig12-snapTAU.140	1.84122	1.75604	1.65092	0.853017	-0.461657	-0.508832	0.634474	0.532782	0.228756	0.735235	0.787775	-0.2237	-0.159487	0.178087	1.09732	0.0357917	0.125139	-0.077042	-0.159455	-0.572403	-0.101995	-0.436703	0.200045	-0.258505	-0.359076	-0.710774	-0.635817	-0.570989	-0.570551	-1	-1	-0.455712	-0.72136	-0.660649	-0.740215	-1	-0.838446	-0.725025
Contig12-snapTAU.151	-1	-1	-1	-1	-1	0.743175	-1	-1	-1	-1	-1	-1	-1	-1	-1	-1	-1	-1	1.0527	-1	-1	-1	-1	-1	-1	-1	-1	-1	-0.603854	-1	-1	-1	-1	-1	-1	-1	-1	-1
Contig12-snapTAU.206	-1	-1	-1	-1	-1	-1	1.36536	-1	1.6881	0.766244	-1	-1	-1	-1	-1	-1	-1	-1	-1	-1	-1	-1	-1	-1	-1	-1	-1	-1	-1	-1	-1	-1	-1	-1	-1	-1	-1	-1
Contig12-snapTAU.208	-1	3.71716	2.76672	-1	-1	-1	0.733613	1.02091	-1	1.93135	0.502501	1.20249	2.14374	-1	-1	-1	-1	0.0211886	-1	-1	-1	-0.808707	0.593605	-1	-1	-1	-1	-1	-1	-1	-1	-1	-1	-0.215379	-1	-1	-0.0541455	-0.476994
Contig12-snapTAU.267	-1	-1	-1	-1	-1	-1	-1	-1	-1	0.614558	-1	-1	-1	-1	-1	-1	-1	-1	-1	-1	-1	-1	-1	-1	-1	-1	-0.924273	-1	-1	-1	-1	-1	-1	-1	-1	-1	-1	-1
Contig12-snapTAU.420	-1	-1	-1	-1	-1	-1	-0.172927	-1	-1	-1	-1	-1	-1	-0.0333442	-1	-1	-1	-1	-1	-1	-1	-0.636212	-1	-1	-1	-1	-1	-1	0.721154	-1	0.454537	-1	-1	-1	1.03254	-1	-0.132214	-1
Contig12-snapTAU.421	2.43074	-1	-1	-1	-1	-1	3.46774	-1	-1	-1	-1	-1	-1	-1	1.8174	-1	-1	-1	-1	-1	-1	1.36599	-1	-1	-1	-1	-0.103989	-1	-1	-1	-1	-1	-1	-1	1.68287	-1	1.18218	-1
Contig12-snapTAU.506	-0.301396	0.882018	1.37989	-1	-0.959257	-0.135761	-1	-0.597449	-0.144347	-0.0112132	0.136201	-0.474978	0.321946	0.164712	1.87863	-0.0986904	0.170027	0.323778	-0.914151	-1	-0.862081	-0.94127	-1	-0.102225	-0.0206398	-1	-1	0.46422	-1	-0.279835	-1	-1	-1	-1	-1	-1	-1	-1
Contig120-snapTAU.15	-1	-1	-1	-1	-1	-1	-1	-1	-1	-1	-1	-1	-1	-1	-1	-1	-1	-1	-1	-1	-1	-1	-1	-1	0.977044	-1	-1	-1	-1	-1	-1	-1	-1	-1	-1	-1	-1	-1
Contig125-snapTAU.60	-1	-1	-1	-1	-1	-1	0.729725	-0.775265	1.28834	0.306216	1.84584	-1	-1	0.605208	-1	-1	0.386285	-0.122165	-1	-0.322074	-1	-0.0569403	-1	0.278198	0.230932	-0.271722	3.20516	3.17598	0.413662	4.44859	1.8413	5.31465	5.92286	6.26593	4.81731	6.24283	4.64938	2.40525
Contig125-snapTAU.61	-1	-1	-1	-1	0.335193	-1	-0.386995	-1	-1	-1	-1	-1	-1	-0.701159	-1	-0.0555784	-1	-0.32027	-1	-1	-1	-0.65504	-1	-1	-1	-1	-0.723479	2.41106	1.14835	3.70114	2.35568	3.36586	3.60278	3.69572	2.00506	3.63683	1.58892	-0.00202477
Contig126-snapTAU.24	5.06755	4.40095	3.24849	3.81484	3.82815	3.15513	3.42654	3.81914	3.31834	4.3876	3.63936	4.57487	4.78563	4.60313	3.51291	4.11357	3.9397	3.25157	3.82399	3.57403	3.37696	3.57985	3.06481	3.28234	3.10408	2.567	1.24862	2.3525	3.07226	3.48742	3.22161	1.99224	2.6658	3.1772	1.82785	2.91181	1.8156	1.96184
Contig13-snapTAU.388	-1	2.7865	-1	-1	0.698369	-1	-1	-0.671743	-1	-1	0.425193	-0.150067	0.047681	0.564044	-0.822361	0.500202	-1	-0.293155	-1	-1	-0.255968	0.224668	0.0439658	0.168847	-0.537512	-0.0764407	-0.730153	3.08661	3.05972	3.13472	3.2827	3.93177	3.54662	3.81329	2.61835	2.08698	1.41564	-0.327953
Contig131-snapTAU.18	-1	-1	-1	2.26246	-1	2.49318	-1	1.87389	-1	1.17983	-1	2.2902	-1	3.4438	1.97347	-1	2.60952	2.64559	-1	0.0296046	0.520949	0.93208	2.80875	-1	-1	0.887597	-0.22295	-1	-1	-1	0.937418	-1	-1	-1	-1	-1	0.232961	0.621291
Contig131-snapTAU.23	-1	3.72469	-1	-1	0.633515	-1	-1	-0.214523	0.620358	-1	-1	0.0749064	0.807997	0.184917	-1	-1	-1	-1	-1	-1	-1	-0.444422	-0.433656	-1	-1	-0.295382	-1	-1	-0.47501	-1	-0.795641	-1	-1	-1	-1	-1	-1	-1
Contig131-snapTAU.35	-1	-1	-1	-1	-1	-1	-1	-1	-1	-1	1.43746	-1	-1	-1	-1	-1	-1	-1	-1	-1	0.528229	-1	-1	-1	-1	-1	-1	-1	-1	-1	-1	-1	-1	-1	-1	-1	-0.913488	-1
Contig136-snapTAU.34	-1	3.22005	-1	1.26387	-1	-1	-0.465757	-1	2.3739	-1	-1	-1	1.95728	1.67485	-0.435754	-1	1.4121	0.0993642	0.487332	2.29418	1.32497	1.47489	-1	0.665804	2.15899	0.859724	2.18107	1.13169	1.75382	2.23595	2.71459	2.21344	3.55556	3.08126	-1	2.44632	2.34263	2.76612
Contig136-snapTAU.35	-1	-1	-1	-1	-1	-1	-1	-1	-1	-1	-1	-1	-0.579051	-0.809597	-1	-1	-1	-1	-1	-1	-0.513837	-1	-1	-1	-1	-1	-1	-1	-1	-1	-1	-0.796917	-1	-0.337155	-1	-1	-0.857501	-0.513058
Contig136-snapTAU.36	0.409193	0.780779	-1	-0.285703	-0.685487	-0.497401	-0.814781	-0.400716	-0.779946	0.362582	-1	-0.531595	-0.317715	-0.279982	-0.47833	-0.744101	-0.458558	-0.0534188	-0.357815	-0.384758	-0.0677457	-0.520236	-0.891188	-0.68276	-0.573155	-0.611011	-0.819174	-0.0780621	-0.00904461	0.426321	-0.182074	0.295792	0.62871	0.465631	-0.182486	-0.115576	0.034662	-0.0940661
Contig137-snapTAU.17	2.66644	3.56128	0.78454	4.40858	4.11954	2.56537	3.06017	3.59895	3.06355	2.1534	2.77786	2.67752	2.35518	4.12318	2.73055	1.92	3.91972	3.06472	2.09514	3.45149	2.9892	2.38303	3.21576	3.11292	2.49698	2.28406	2.58675	1.8348	3.34349	2.52465	2.49537	1.65375	2.84926	0.459484	0.523563	1.23104	1.78876	1.69919
Contig14-snapTAU.276	0.596834	-1	1.35056	-1	0.0671711	-0.901518	-0.474699	-0.288298	-0.190851	1.17997	-0.297077	-0.658537	1.41162	0.312891	-0.662275	0.701036	0.607035	0.774286	-1	-1	-0.886848	-0.666432	-0.66711	0.0566205	0.19969	-0.698881	-0.449032	-0.676822	-0.899803	-0.0898554	-0.561395	-0.746185	-0.423632	-0.526507	-0.775659	-0.358206	-0.73405	-0.80123
Contig14-snapTAU.287	2.59594	3.07502	4.24192	7.65493	3.70522	3.05755	3.57413	4.1038	3.93122	3.42072	3.26616	4.01655	3.27634	4.13097	4.56185	3.07513	4.60391	3.07159	2.37057	3.09718	3.07858	3.64041	3.81775	3.83039	4.12208	2.93576	3.684	3.70995	3.38543	3.17923	3.38222	3.31979	3.98395	3.38262	4.49282	4.06502	4.59226	4.20821
Contig14-snapTAU.327	2.71942	3.7826	2.93484	3.57776	1.53514	3.11628	1.99507	2.77057	2.38961	2.0178	1.43586	1.99245	2.42962	2.69678	3.32839	3.26477	3.11015	2.56802	1.69951	1.62978	2.93791	2.27035	2.15553	1.46545	2.12627	1.95468	1.27886	2.34456	2.18454	1.92091	1.94952	2.22228	2.72027	2.97647	2.07932	1.32901	2.90545	2.96001
Contig14-snapTAU.330	-1	-1	-1	-1	-1	-1	-1	0.46078	-0.358006	-1	-1	-0.598746	-1	-1	1.53545	-1	-1	-1	-0.467131	-1	0.12538	-0.616541	-0.152557	-1	-1	-1	-1	-1	1.98822	2.46981	2.22014	-0.0821705	1.03831	0.63307	-0.514172	-0.0924508	-0.582624	-0.466914
Contig14-snapTAU.419	-1	-1	-1	-1	-1	-1	-1	-1	-1	-1	-1	-1	-1	-1	-1	-1	-1	-1	-1	-1	-1	-1	-1	-1	-1	-1	-1	0.478801	-1	0.545899	0.60776	0.744202	1.98141	2.59384	0.0529125	0.116402	0.630917	-1
Contig14-snapTAU.466	6.98676	7.79943	8.13954	8.13242	7.13305	7.23193	7.92688	7.87261	8.19039	8.3743	7.79071	7.79157	7.53309	8.21515	7.78036	7.18694	7.55005	7.6756	7.90395	7.62448	7.37474	7.20022	7.93789	7.99013	8.14264	8.19201	7.79954	8.07347	7.69283	7.48247	7.80099	7.36416	8.46895	8.11372	9.02564	8.17881	8.19586	8.25131
Contig14-snapTAU.488	1.29294	-1	-1	1.128	-1	-1	-1	-1	-1	-1	1.34551	-1	0.784101	1.10036	-1	-1	-1	-1	0.170113	-1	2.3208	2.44683	-1	-1	-1	-1	1.92118	-1	-1	0.936637	-1	-1	-1	4.23121	-1	-1	-0.234501	1.27857
Contig140-snapTAU.45	2.12851	2.9951	4.31299	2.59501	4.36179	2.12267	2.83145	3.07559	3.32209	2.31665	2.96405	2.44448	2.77801	2.98674	2.75161	2.78888	2.04175	2.55368	1.86289	2.29857	2.56447	2.204	2.21265	2.46956	2.81501	2.31148	1.75571	3.07084	3.01336	2.59647	3.22926	2.81649	3.39938	3.24682	2.88106	3.18156	4.11334	4.23238
Contig141-snapTAU.23	1.80505	2.17622	3.72385	2.71979	3.36467	2.36359	2.83764	2.64593	3.41664	3.44565	1.9234	2.71746	2.57934	2.84869	3.31788	3.14936	2.46729	2.29174	2.58429	2.8027	2.90601	2.81661	1.78368	2.33482	2.19918	1.04895	1.58544	2.58538	2.64911	1.49856	2.40092	1.76731	3.65164	3.81766	2.72267	2.39465	3.85918	3.79779
Contig141-snapTAU.32	2.25111	1.66214	3.04167	5.12312	1.91728	2.45547	2.60715	2.89159	2.84414	4.13281	2.81757	3.0417	3.19503	3.30548	3.70641	2.83982	3.8613	3.12194	3.19809	1.8834	2.4365	3.42818	2.59907	3.16603	4.02245	3.61938	4.0304	5.01983	4.41871	4.61591	4.8513	4.32058	5.73351	5.49609	3.8538	5.03626	5.52995	5.42903
Contig142-snap.16	4.39691	3.57862	5.02891	3.42229	3.84511	3.01623	3.38599	3.78025	4.21177	3.91906	3.15502	3.72644	3.9908	3.9923	3.94477	3.36079	2.30589	2.99263	1.91057	2.44647	2.87528	2.8812	2.15067	2.33456	2.16877	1.63798	1.47581	2.20796	2.47626	1.87113	2.01768	1.87338	2.68511	2.74445	1.33681	-0.163805	2.10954	1.84069
Contig142-snapTAU.28	0.174705	0.0015227	0.497612	-0.199844	-0.186965	-0.394992	-0.687538	-0.426509	-0.144034	-0.30212	-0.445475	-0.475051	-0.278104	-0.373246	0.416936	0.355329	0.537795	0.105579	0.454685	-0.157781	-0.315161	-0.618563	-0.757228	-0.573574	-0.1028	-0.40737	-0.348477	-0.530718	-0.746898	-0.813748	-0.812611	-0.855335	-0.763112	-0.410471	-0.506069	-0.55464	-0.782905	-0.874487
Contig142-snapTAU.31	-1	-1	-1	-1	-1	-0.904558	-1	-0.72776	-0.778078	-0.861412	-0.556476	-0.87614	-1	-0.92627	-0.923505	-0.803632	-1	-1	-0.759668	-1	-1	-0.794284	-1	-0.893815	-1	-1	-0.824775	-1	-1	-1	-0.93027	-1	-1	-1	-0.893176	-1	-0.986668	-0.879369
Contig142-snapTAU.32	0.845844	0.553723	1.69171	0.644568	0.811775	0.544679	1.17176	1.27132	1.74141	2.19197	1.2246	0.846014	1.36543	0.841743	0.946775	1.20447	0.35423	0.895928	0.146855	0.677432	0.802745	0.601493	0.0213365	-0.172844	-0.280586	-0.488605	-0.251179	-0.0366425	-0.268623	-0.473046	-0.402845	-0.610315	-0.298734	0.119992	-0.711065	-0.68178	-0.544542	-0.631443
Contig143-snap.6	2.87896	3.7902	2.82686	2.63444	0.746948	1.55884	0.289322	1.64064	2.60271	1.91406	1.93343	1.41909	2.18821	1.7146	2.41579	2.65029	0.7545	2.12061	1.2607	1.39983	2.18105	0.865233	1.56249	1.37238	2.03168	1.02585	0.376491	0.944093	0.604362	1.69852	0.382529	-0.488325	1.01766	0.122281	-1	0.282107	0.103621	0.365982
Contig143-snapTAU.26	2.0187	1.92135	2.82446	1.61324	3.15007	1.55165	1.12997	2.0045	1.38754	1.60046	2.75014	1.16048	2.79689	2.22168	3.86073	2.2	2.75096	0.387481	-0.162027	0.770837	1.8711	0.289347	1.5617	1.64349	2.13605	1.11066	0.127906	0.370953	0.391066	0.285687	0.47828	0.427214	0.474509	0.399758	1.0575	0.67026	0.336951	0.68161
Contig144-snapTAU.18	7.05205	7.56302	8.35909	8.12594	7.05966	6.30291	6.80545	7.26344	7.30281	9.56751	7.59161	7.09377	6.8712	7.88136	7.42811	7.58974	8.52774	7.1426	7.08285	7.21705	7.4207	7.07409	7.47281	7.76039	7.67855	7.56123	6.85636	7.74257	7.19299	7.54295	7.05583	7.30378	7.61919	6.97976	7.84213	7.35824	7.38409	7.58807
Contig144-snapTAU.25	2.02942	0.366983	1.95733	2.71852	2.68288	1.74255	1.91826	1.95206	2.36084	1.8095	2.21124	1.91474	2.2128	2.2303	2.81261	2.54921	3.60172	2.11635	2.53115	2.88729	2.66349	1.59786	2.08619	1.56467	1.29467	1.20064	0.850038	0.777982	2.42932	1.79553	2.22461	1.33287	1.32231	1.26937	0.0930738	0.7545	0.714302	0.628053
Contig146-snap.29	1.17297	-1	-1	-1	-1	1.08334	0.849064	2.02343	3.73839	-0.30074	2.88057	1.63931	-0.000678721	0.283166	0.415403	1.33901	1.76505	0.83612	4.55923	1.1548	-0.328034	0.30477	0.139537	-0.688161	0.113804	0.370463	-0.0702471	2.22659	1.64582	0.0788003	1.0831	-0.177283	0.053134	1.49353	-0.0346607	0.621219	-0.128741	-0.143101
Contig15-snapTAU.113	-0.521985	-1	-1	-1	-0.979528	-1	-1	-0.661087	-0.727323	-0.35743	-0.678018	-1	-1	-0.407487	0.0536034	-0.777014	-1	-0.509677	-0.833457	-0.579806	-0.621139	-0.827889	-0.381297	-0.522938	-0.699951	-1	-0.980065	-1	-0.94848	-1	-1	-0.775739	-0.842384	-1	-1	-0.692969	-0.698609	-1
Contig15-snapTAU.114	2.639	2.09862	1.68012	2.02307	2.34699	1.45094	1.92419	2.23131	2.20974	2.03737	0.303829	1.54998	1.76401	1.55448	1.73082	1.75423	2.29413	1.68836	0.733999	1.57398	1.6075	1.46166	0.779793	0.554937	0.408744	0.129732	-0.00992033	-0.078379	0.718761	-0.364459	0.467043	-0.0363603	0.626011	0.319323	-0.0445	-0.384209	0.315712	-0.148798
Contig15-snapTAU.246	3.03221	2.80817	0.899654	1.90282	1.37123	1.2857	-0.0110968	1.29532	1.13491	1.13895	0.909466	0.682033	1.59271	2.17272	1.59376	1.34637	0.973695	-0.0281114	0.649242	1.76544	1.33873	0.304269	1.13754	-0.251528	-0.372269	-0.431027	-0.501683	-0.898111	0.0128707	-0.360508	0.346631	0.153367	0.0818953	-0.795696	-0.794204	-0.844719	-0.743386	-0.553308
Contig15-snapTAU.248	1.48834	2.25504	1.77502	1.54808	1.27151	0.288174	0.5065	-0.319013	0.402344	1.34268	-0.445399	0.073788	0.566776	0.497247	1.60688	0.400638	1.0093	-0.506126	0.0657168	0.290257	0.230645	-0.505984	0.086555	0.403101	-0.529804	-0.892349	-0.869115	-1	-0.253504	-0.059613	0.160675	-1	-0.597839	-0.863517	-1	-1	-0.938819	-0.90998
Contig15-snapTAU.259	-0.462474	0.399212	-0.167587	-1	-0.794529	-0.56996	-0.465045	-0.612619	0.36472	-0.648934	-0.677597	-0.0796654	0.298472	-0.509193	-0.196392	-0.418481	-0.248393	0.199994	-0.888785	-0.723769	-0.424548	-0.643322	-0.716635	-0.772563	-0.603232	-0.855909	-0.723297	-0.798799	-0.235521	-0.855269	-0.83535	-0.881925	-0.854119	-0.870787	-1	-1	-0.895043	-0.620131
Contig15-snapTAU.261	2.61262	2.94672	3.58479	-1	-0.96408	-1	0.4698	-0.748754	-0.13202	-1	1.21371	1.07651	-1	1.08218	0.653691	0.996405	-1	0.452138	-1	0.843348	0.505047	-1	-1	0.0207357	0.154649	0.0465892	-1	-1	-1	-0.432594	1.146	-1	-1	-1	-1	-1	-0.541816	-0.293312
Contig15-snapTAU.320	-0.213539	0.995014	-1	-1	-1	-0.487024	-0.3501	0.473621	-0.550897	0.130753	0.559017	-0.546027	0.11429	0.104569	-0.441025	0.231711	3.58753	-0.194296	0.650729	0.244655	-0.360752	-0.432753	-0.0993891	-0.117215	-0.226054	-0.034634	-0.481846	0.393083	-0.0361896	-0.0653969	-0.504038	0.508049	-0.089996	-0.59106	-0.737644	0.465442	-0.595517	0.484358
Contig15-snapTAU.321	1.15787	1.37196	2.36532	1.34756	1.40216	0.64077	0.966599	1.9002	1.40799	1.78972	3.02225	0.61299	2.28717	0.558295	0.994119	1.62474	1.54956	0.102287	-0.16079	0.199139	1.06047	0.027226	0.475454	0.734564	-0.0662817	-0.222778	-0.115273	0.745326	0.419528	-0.710729	-1	-0.212484	0.407939	1.01351	-1	-1	0.197534	-0.23853
Contig154-snapTAU.5	2.77147	3.251	4.13856	3.22106	3.65656	2.06671	3.62538	3.01944	3.57344	3.62398	2.56518	2.18599	2.48281	2.69584	3.14293	2.27854	1.37707	2.41205	2.9796	2.37128	2.41805	2.8598	1.85681	2.28771	2.6815	2.07508	-0.506922	1.73402	0.41541	0.60664	0.145455	1.62832	1.18874	2.19253	1.81041	1.20705	0.971204	1.03143
Contig16-snapTAU.184	-1	1.46201	-1	-0.472704	-0.275862	-0.675489	-0.331234	-1	0.105101	-0.141815	-1	-0.460575	-0.578106	-1	-0.766536	-0.00217442	-1	-0.482255	-0.88145	-0.286182	-1	-1	-1	-0.891166	-0.776197	-1	-1	-1	-1	-0.689037	-1	-1	-1	-0.733999	-1	-1	-0.923661	-1
Contig16-snapTAU.216	2.66696	4.42519	2.51521	0.730894	2.27307	-0.266684	0.339356	1.63235	2.16185	1.37432	1.30008	0.945379	2.63394	2.13869	5.22276	0.740993	1.51253	1.09233	2.46236	0.0888695	0.528442	0.468094	1.20604	-0.141072	-0.478817	-0.304854	1.14119	-0.0166418	-0.382221	-0.308919	0.676643	1.27725	0.783901	1.26565	1.50459	-1	0.0845839	-0.47398
Contig16-snapTAU.263	-1	-1	-0.398675	-1	-1	-1	-1	-1	-1	-1	-1	-1	-0.547372	-0.254877	-1	-1	-1	-1	-0.819994	-1	-1	-0.87531	-1	-1	-1	-1	2.14218	-0.668911	-1	1.92452	0.536172	2.17076	3.22531	3.95593	2.34466	3.41731	1.77556	-0.0758229
Contig16-snapTAU.34	2.07628	-1	-1	-1	-1	1.08997	0.956292	1.74511	-1	-1	-1	-1	-1	2.34594	1.31432	0.7258	1.33654	1.11659	-1	0.957407	2.42746	0.692391	-1	1.17644	1.0588	1.7569	0.89945	1.95003	-1	2.13056	1.01005	1.79023	2.05904	2.55762	1.78733	1.65914	2.4261	0.880463
Contig16-snapTAU.36	-0.323302	1.12835	2.57677	-1	-1	-0.583091	-1	0.177784	-0.200114	-0.366228	0.996365	0.236196	-0.26383	-0.363879	0.716807	0.672645	0.344897	0.0233817	1.16381	0.0517601	0.590047	0.346308	-0.257484	0.32489	1.0389	0.508047	0.785584	1.36076	1.06917	1.7321	1.46254	2.32085	1.54942	1.57528	1.38495	0.229864	2.32782	2.44024
Contig16-snapTAU.91	-1	-1	3.65474	-1	-1	0.765064	-1	-1	1.01716	-1	-1	-1	-1	0.937476	1.06978	2.02119	1.29878	1.21968	0.356097	1.12474	1.46111	0.148953	0.103524	0.0483764	0.656944	1.37348	3.8324	1.90629	1.86275	3.04092	3.46135	3.25334	3.15897	3.02548	1.5906	2.39544	1.54764	1.76248
Contig168-snapTAU.2	6.49753	3.96194	5.99086	4.81629	1.07225	4.24902	6.62787	4.87375	5.64943	5.55981	5.37444	5.66264	4.15034	4.67515	2.38959	3.91379	4.06827	4.6714	5.73944	4.03407	4.72476	3.73224	3.52118	3.3413	2.61374	3.4141	3.02704	4.09851	1.78801	3.83387	2.7297	1.85058	4.73868	5.82683	2.21983	-1	3.38385	3.29224
Contig17-snap.258	-0.0531835	0.319693	-1	-1	0.533783	-0.433033	-0.801588	0.591171	-0.0310526	-0.364054	-0.692497	0.00799957	0.00632624	0.311823	0.555992	0.370759	1.21828	-0.15076	0.968117	0.488902	-0.229062	-0.543417	-0.579204	0.116428	-0.120106	-0.539234	-0.0866981	-0.520954	-0.379062	-0.536758	-0.199703	-0.662197	0.544118	-0.626553	-0.272711	-0.0261257	-0.535163	-0.543565
Contig17-snapTAU.226	0.104125	0.244113	1.09376	1.13481	-0.235971	-0.415591	-0.210543	0.380736	0.427282	0.274161	0.540069	-0.114639	0.420582	0.680294	-0.312682	0.293282	0.324678	0.57561	2.16583	0.28721	0.691691	-0.103919	0.245735	-0.412253	0.32592	-0.146741	-0.71426	-0.236576	-0.484682	-0.557368	-0.562016	0.29443	-0.620739	-0.520234	-0.671399	-1	-0.822582	-0.642056
Contig17-snapTAU.319	3.20866	3.22911	3.0945	2.36356	3.04284	1.77896	2.2563	2.51239	2.65038	2.91483	2.80801	2.01911	2.05005	3.18657	3.39683	3.36676	2.92624	2.68336	2.309	3.36748	2.49802	1.38137	1.7031	0.906729	1.09187	0.916847	0.7986	1.19574	1.36358	0.841649	1.60221	1.46336	1.6236	1.80005	0.198025	0.283007	1.14921	0.985891
Contig173-snapTAU.12	2.39708	-1	-1	0.83602	1.27668	1.18543	3.28569	5.1022	5.41622	6.24868	1.04389	1.49248	1.73803	1.99447	0.537395	3.10898	3.99138	5.94302	2.0803	1.43128	1.90235	0.687609	1.47107	1.67741	2.23416	5.03321	3.7984	2.45909	2.13482	1.18849	1.59935	0.525403	1.18602	1.57422	1.4812	1.50295	0.568715	0.420092
Contig173-snapTAU.14	-0.254241	-1	-1	-1	-0.515439	-0.191205	0.286692	0.961271	0.301166	2.54048	-1	-1	-1	-1	-1	0.339177	0.990175	1.44822	-0.480641	-1	-0.910923	-0.75731	-1	-0.867186	-0.321593	0.299025	-0.424998	-0.533607	-0.939211	-1	-1	-0.67003	-1	-1	-1	-1	-0.937296	-1
Contig18-snap.212	-1	-1	-1	-1	-1	-1	1.32398	-1	-1	-1	-1	-1	-1	-1	-1	-1	-1	-1	-1	-1	-1	-1	-1	-1	-1	-1	-1	-1	-1	-1	-1	-1	-1	-1	-1	-1	-1	-1
Contig18-snapTAU.220	0.9476	-1	-1	2.95194	-1	-1	1.48424	-1	1.76766	-1	-1	-1	-1	-1	1.03656	-1	1.67853	1.69489	-1	-1	1.09222	-0.307345	-1	-1	-1	0.956624	-1	0.708714	0.414948	2.21638	-0.299209	0.0757929	0.472857	-1	1.12986	-1	-0.0366692	0.913192
Contig18-snapTAU.45	2.10143	3.47966	-1	4.97291	2.04229	1.4767	2.43097	3.88441	2.30873	3.21948	0.857091	2.64315	1.65632	2.90385	4.85764	3.00779	2.46223	2.41814	2.32235	1.61247	1.33268	2.02498	2.38037	3.19913	3.57911	3.1973	2.65703	2.74303	2.69569	2.75318	2.31436	3.50022	2.87589	2.90563	3.98038	4.15823	4.36114	4.88754
Contig18-snapTAU.46	0.624755	1.75671	2.47929	-0.115688	1.05394	1.42532	0.717917	-0.717027	0.750569	0.332558	-0.401261	0.400407	2.82228	1.61686	1.85579	0.975331	0.276902	1.11866	2.06875	0.322775	0.94717	0.387104	0.00225021	0.779609	1.27511	0.433706	0.0699278	1.45803	-0.130232	-0.411284	-0.0133143	1.26297	3.49261	4.14756	4.97692	4.03758	5.852	5.97364
Contig19-snapTAU.1	0.858592	-1	-1	-1	0.304139	0.271058	1.24239	-1	1.19787	-1	2.08478	0.0640287	2.09672	-1	0.422885	-0.669022	-0.0268448	0.581024	0.692576	0.367219	-0.703688	0.210955	-0.286033	-0.769837	0.287549	0.230254	0.570215	0.868386	-0.201048	0.220819	0.217266	0.482103	0.936646	0.788902	0.596247	0.686959	0.29087	-1
Contig19-snapTAU.252	-1	-1	-1	-1	-1	-1	-1	-1	-1	-1	-1	-1	-1	-1	-1	-1	-1	-1	-1	-1	-1	-1	-1	-1	-1	-1	-1	-1	-1	2.92492	-1	-1	-1	-1	-1	-1	-1	-1
Contig19-snapTAU.287	1.74697	2.26092	2.26634	1.33086	0.906619	0.653416	0.677641	1.06409	2.05015	1.33248	1.45269	0.518191	0.741597	0.0301141	1.2795	1.29796	0.555657	0.562735	1.15089	0.489239	0.326573	-0.231611	-0.325194	0.0346577	-0.625844	0.279458	0.176301	0.196088	-0.529482	-0.350499	-0.331664	-0.84944	0.044612	-0.356939	-1	-0.408817	-0.231916	-0.441609
Contig19-snapTAU.304	3.46364	2.96913	-1	1.06698	2.4287	2.0712	2.48035	3.14167	4.11114	3.51454	2.22964	2.39523	2.50146	2.18626	2.32227	3.3176	3.33319	2.54208	3.63058	3.124	3.53879	2.93015	2.40185	3.36425	3.70169	3.92169	3.05588	4.6333	4.38712	4.04506	4.14003	5.14726	3.98178	4.93413	4.41797	5.80214	5.12473	5.43715
Contig1934-snapTAU.1	-1	-1	-1	-1	-1	1.53952	-1	0.906643	-1	-1	-1	2.57013	-1	0.877301	2.39658	1.75823	0.460666	0.974879	2.25616	1.88534	-1	1.00972	1.49369	0.73804	1.10861	-1	-0.526692	0.0318708	-0.237648	-1	-1	-1	2.07284	0.800647	-1	2.00365	1.50138	1.19158
Contig197-snapTAU.4	-1	-1	-1	-1	-0.139339	5.41682	4.01128	4.14961	5.20925	3.47212	3.79657	3.6458	5.64899	4.74764	2.42838	3.66139	3.74674	5.5653	3.86195	4.1425	3.80581	4.94096	3.48214	4.03525	5.87146	3.60918	7.87564	5.49836	3.90406	2.00952	5.16008	5.56575	3.44701	2.50817	-1	-1	4.13814	3.81749
Contig197-snapTAU.5	4.75704	5.50668	5.75148	7.04832	5.35975	4.57459	4.64749	5.25056	5.43844	5.22796	4.6485	4.96334	4.72467	5.45953	5.07372	5.4477	5.69037	5.23319	4.81787	4.9421	4.95117	4.6593	5.23071	5.31671	5.43236	5.18847	4.55333	5.59713	5.37504	5.59587	5.4432	5.95711	5.57614	4.7215	4.12084	5.65937	5.53586	5.66527
Contig199-snapTAU.1	0.0356643	2.06249	-1	1.11809	0.187839	0.826182	0.629389	1.28912	0.976815	1.50125	-0.35392	1.30819	0.922358	1.56496	-0.12033	1.00631	0.50806	0.849737	0.163188	-0.0490043	0.0461095	0.258886	0.245202	0.273848	0.245738	0.373816	0.00626246	0.241369	0.295202	1.05116	0.683366	1.19914	1.85	1.22952	0.58039	-0.0799607	1.74865	1.19819
Contig2-snapTAU.201	0.548104	1.94555	3.08155	1.61509	-0.0919589	-0.398448	-0.489462	0.961625	1.63375	0.637976	0.263175	0.603546	0.917905	0.121253	0.223437	-0.399915	-0.33108	0.578331	-0.412862	0.330949	-0.547101	-0.51855	-0.560933	-0.238485	0.0314941	1.38284	1.57167	0.842685	-0.0924932	-0.279678	-0.0151174	-0.439841	-0.013118	0.459712	-0.818316	1.59886	-0.638448	-0.825554
Contig2-snapTAU.243	1.7693	2.22543	1.72265	1.5792	0.817649	0.635983	0.246713	1.40074	1.54934	1.54979	1.35657	2.18529	1.07292	1.89135	2.01842	1.00929	0.163914	0.680422	-0.599487	0.660795	0.632233	0.561602	0.7	0.589085	0.414925	-0.262455	-0.771496	-0.485779	0.0478165	1.36546	1.23206	0.465875	0.858679	-0.176018	-0.35122	-0.300047	0.668383	-0.0557782
Contig2-snapTAU.274	-1	-1	-1	-1	-1	-1	-1	-1	-1	-1	-1	-1	-1	-1	-1	-1	-1	-1	-1	-1	-1	-1	-1	-1	-1	-1	-1	0.259204	-0.716667	0.71052	0.00842605	1.72995	1.88126	1.09521	0.39883	1.0403	0.24318	-0.215673
Contig2-snapTAU.382	2.19512	2.77366	1.80833	2.36159	2.94554	1.80826	2.31593	3.06882	3.44325	2.42626	2.20924	1.9946	2.5457	2.29028	2.04072	2.31226	4.19536	2.62175	2.51214	1.73019	1.9668	1.20933	1.67397	1.94847	1.98482	2.414	2.12902	2.41947	2.32911	2.25626	2.15958	2.64875	2.76539	3.17301	3.24972	2.57688	3.05255	2.65926
Contig2-snapTAU.407	0.446205	-1	3.02346	0.763038	1.19195	1.03743	-0.127614	1.28538	0.467529	0.38876	-1	0.191879	0.895799	2.50406	-1	0.383637	1.19478	0.0941828	-0.244037	1.04376	0.782034	-0.523257	0.462188	-0.107088	0.124551	-0.433985	-1	-1	-0.654707	1.28777	-1	-0.353587	0.213777	-0.151867	-1	-1	-0.930591	0.0643711
Contig2-snapTAU.518	0.0360455	0.30159	-1	-0.105064	-0.603137	-0.836469	-0.822617	-0.647688	-0.54536	-0.761211	-1	-0.49706	-0.585918	-0.929876	-1	-0.892611	-0.31051	-1	-0.829331	-0.863286	-0.550269	-0.882247	-0.750202	-1	-0.886198	-1	-1	-0.250148	-0.875267	0.177777	-0.248062	-0.0648778	0.934911	0.554848	-0.336784	-0.279139	-0.13433	-0.681179
Contig2-snapTAU.98	-1	-1	-1	-1	-1	-1	1.73373	-1	-1	-1	-1	-0.385134	-1	-1	-1	1.77433	1.30853	1.7434	-1	0.384424	1.18594	-1	-1	-0.460728	-1	0.115336	-1	-1	-1	-1	-1	-1	-1	-1	-1	-1	0.128719	-1
Contig20-snapTAU.107	0.456613	3.05588	0.974705	1.91985	-1	0.247433	-0.496631	-0.618555	-0.0232374	0.298293	-1	1.48025	0.408004	2.06766	0.88784	1.02108	-0.211125	0.090742	0.605377	0.911379	1.54913	1.05105	0.589648	-0.243459	-1	0.471645	-1	-0.0480471	-0.0646191	0.116766	0.00677186	0.509264	0.247547	-0.304653	-0.0699482	-1	-0.34708	-0.411118
Contig20-snapTAU.112	-1	-1	-1	-1	-1	-1	-1	-1	-1	-1	-1	-0.260184	-1	-1	-1	-1	9.03967	-1	-1	-1	-1	-1	-1	-1	-1	-1	-1	-1	-1	-1	-1	-1	-1	-1	-1	-1	-1	-1
Contig20-snapTAU.141	-1	4.21216	-1	-1	-1	0.997826	0.761363	-1	-1	-1	-1	0.656782	-1	-1	-1	3.75336	-1	-1	-1	-0.397	2.8797	0.207505	-1	1.99957	0.89127	-1	-1	0.628361	0.00439778	0.805553	-0.261746	0.386048	0.721141	1.09209	1.19775	-1	-0.289445	0.45076
Contig20-snapTAU.209	-1	-1	-1	-1	-1	1.30126	1.87193	-1	2.33349	1.36521	3.30895	2.71718	-1	1.39636	-1	0.785076	-1	1.68292	-1	0.465914	-1	-0.356829	-1	-1	-1	0.0268679	0.456167	-1	0.149374	-1	-1	-1	-1	-1	-1	-1	0.420203	-1
Contig20-snapTAU.233	-0.586582	-0.26798	-1	-0.248341	-1	-0.840833	-0.756791	-0.698364	-0.543488	1.27332	-0.745939	-0.872664	-0.744932	-0.684734	2.1674	-0.273612	-0.839436	-1	-0.679116	-0.841488	-0.680847	-0.580405	-0.725723	-0.8321	-0.635657	-0.7048	-0.754898	-0.383925	-0.479726	-0.429757	-0.653289	-0.692257	-0.557748	-0.539293	-0.528098	0.546672	-0.527217	-0.326732
Contig20-snapTAU.335	-1	-1	-1	-1	-1	-1	-1	-1	-1	-1	-1	-1	-1	-1	-1	-1	-1	-1	-1	0.541014	-1	-1	-1	-1	-0.253043	-1	-1	-1	-1	0.0629578	-1	-1	-1	-1	-1	-1	-1	-1
Contig209-snapTAU.3	-1	-1	-1	-1	-1	-1	-1	-1	-1	-1	-1	-1	-1	-1	-1	-1	-1	-1	-1	-1	-1	-1	-1	-1	-1	-1	-0.35969	1.25561	-0.459913	1.60715	-0.138364	1.93118	2.51946	1.5814	0.0550903	1.1885	0.516181	-0.415045
Contig21-snapTAU.106	-1	-1	-1	-1	-1	-1	-1	-1	-1	-1	-1	-1	-1	-1	-1	-1	-1	-1	-1	-1	-1	-1	-0.328351	-1	-1	-1	-1	-1	-1	1.9199	-1	-1	-1	-1	-1	1.30302	-1	-1
Contig21-snapTAU.107	-1	2.53839	-1	-1	-1	0.673374	1.02491	1.75314	2.15306	0.433668	1.85226	0.962565	-1	3.30974	1.82274	-1	-1	2.53989	2.47789	2.52271	2.64406	1.10923	1.07093	1.49482	2.69531	3.24461	3.37462	4.71919	4.59226	4.96838	5.22495	5.85242	4.90112	5.25551	5.0202	5.63765	5.24832	5.37712
Contig21-snapTAU.284	1.27736	-1	-1	6.70292	-0.914313	1.37714	1.37583	0.355266	0.280932	1.00665	2.03754	0.761452	1.50714	1.0163	0.131635	2.15485	2.29542	0.632761	1.27455	1.35706	1.38956	1.135	0.841758	1.89223	0.911104	1.19077	5.81124	0.697618	5.15004	6.83959	8.28779	7.20296	8.76731	8.56321	8.85236	8.52695	7.94394	8.14894
Contig21-snapTAU.319	-1	-1	-1	-1	-1	-1	-1	-1	-1	-1	-1	-1	-1	-1	-1	-1	-1	-1	-1	-1	-1	-1	-1	-1	-1	-1	-1	1.47869	1.3078	1.79973	1.50201	2.16119	3.16645	2.3425	1.40708	1.58945	1.20565	-0.443974
Contig215-snapTAU.2	-1	-1	-1	-1	-1	-1	-1	-1	-0.483744	2.8301	-1	-0.785763	-1	-1	-1	-1	-1	-1	-1	-0.429716	-0.738291	-1	-1	-1	-1	-0.625127	-1	-1	-1	-0.813157	-1	-1	-0.583288	-1	-0.737168	-1	-0.555504	-1
Contig22-snapTAU.125	1.25168	1.44047	0.715573	0.706607	0.280859	-0.172664	1.52884	0.839854	0.824454	0.839316	0.410728	0.621909	0.950719	0.871257	0.50411	1.49874	0.665061	0.946888	1.89504	0.137258	1.50489	0.997057	0.661065	1.19547	1.95655	1.34562	1.56165	1.85776	1.60963	2.56581	2.42381	1.85141	2.15517	1.67152	1.2939	2.41553	2.47385	2.67299
Contig22-snapTAU.159	7.41393	8.09872	8.37741	7.18938	7.25303	7.03875	7.44254	7.72821	7.84545	7.35108	6.17399	5.6916	5.94143	7.1917	7.35654	7.88061	7.24815	7.03941	6.77745	7.10528	7.19005	6.78006	6.62483	7.23672	7.14787	6.92463	6.5866	7.41716	6.83133	6.37364	6.65127	6.70716	7.62143	6.93438	7.6137	6.23827	7.56185	7.38273
Contig22-snapTAU.16	1.80352	1.70171	2.47737	2.12982	3.60847	0.831153	1.68472	1.2255	1.34979	1.79217	0.377942	1.06821	0.792689	1.60384	2.06243	1.88892	0.756569	0.543268	0.862615	1.44355	1.42856	1.50589	0.794023	1.35294	1.72629	1.35172	1.01461	1.9155	2.43184	2.35068	2.49743	1.65791	2.8934	2.75216	2.95522	2.6438	3.87789	4.12979
Contig22-snapTAU.253	1.08263	2.48417	4.04049	0.448872	-0.350344	0.238134	0.708452	0.742394	0.84429	1.56787	1.90745	1.04125	1.59037	1.12188	3.11241	3.10321	2.87966	1.66284	2.81666	2.4891	2.31386	1.1906	1.31034	2.13803	1.74243	1.32597	1.9671	0.829543	0.260837	0.388595	0.771465	0.767425	1.81673	2.87417	0.654243	2.45893	0.84702	1.15388
Contig23-snapTAU.204	-0.283582	1.47727	2.67612	2.03547	0.992459	0.97119	1.50501	0.778046	0.718584	-0.573766	0.0340201	0.146462	1.02859	-0.145432	1.15549	2.34413	2.51989	0.945037	0.974853	1.15014	1.25427	-0.0504275	-0.28004	0.353665	-0.162566	0.188694	-0.571088	-0.660086	0.275325	-0.623197	0.0628308	-0.129998	0.350441	-0.317387	0.207931	-0.309036	-0.140437	-0.479209
Contig23-snapTAU.248	-1	-1	-1	-1	-1	-1	-1	-1	-1	-1	-1	-1	-1	0.195972	-1	-1	5.70868	-1	-1	-1	-1	-0.727666	-1	-0.871232	-1	-0.691451	-1	-1	-1	-1	-1	-1	-1	-1	-1	-1	-1	-1
Contig232-snapTAU.1	1.98281	-1	2.71379	1.64107	1.65084	0.455864	1.55381	1.67363	2.20179	2.6822	1.67767	0.0707786	1.94903	2.34781	4.28712	3.62686	2.81854	0.975379	1.87782	1.84841	1.58245	2.42387	2.34862	1.1407	2.44621	2.17158	2.51454	3.47281	2.36795	2.84348	2.79289	3.05876	3.29084	3.29257	2.41749	2.52186	3.67858	3.81791
Contig238-snapTAU.3	-1	-1	-1	-1	-1	-1	-1	-1	-1	1.30416	-1	-1	-1	-1	-1	-1	-1	-1	-1	-0.499686	-1	0.383832	-1	-0.565589	-1	-1	-1	-1	-1	-1	-1	-1	-1	-1	-1	-1	-0.883673	-1
Contig24-snap.65	-0.118664	-1	-0.0412164	-0.298293	-0.0532077	-0.378698	-0.740735	-0.785585	-0.453766	0.622457	-1	-1	-0.506177	-0.808088	-1	-0.587635	-0.232263	-0.0646042	-0.686793	0.353342	-0.474954	0.333011	-0.582132	-1	0.28859	-0.67534	-0.960769	-1	-0.899953	-0.320664	-0.662101	-1	-1	-1	-1	-1	-1	-1
Contig24-snapTAU.151	0.887864	1.41404	1.58666	-0.580516	1.189	0.170773	1.12961	0.8365	1.76204	1.31419	0.368499	0.408592	1.07535	0.829826	1.67708	1.70802	1.75802	1.52393	-0.130122	1.35232	0.975078	0.553431	-0.186715	1.28805	1.42862	0.931132	0.543773	1.47803	0.476627	1.31543	1.44913	1.64029	1.78924	1.60715	1.42239	0.518933	2.37884	2.41506
Contig24-snapTAU.241	-1	-1	-1	-1	-1	-1	-1	-1	-1	0.600264	0.159436	0.804222	-1	-0.219655	-0.026499	-1	-1	-1	-1	0.490079	-0.0152426	-0.191488	-1	-1	-1	-1	-0.910371	-0.234247	0.735782	-0.049631	0.551732	-1	-1	-1	-1	-1	-1	-1
Contig24-snapTAU.242	2.34088	2.49737	-1	-1	-0.909416	0.604595	-1	-1	-1	-1	-1	0.0414341	0.709112	0.654888	1.37166	-1	-1	-1	-1	-1	-0.682243	1.06987	1.43339	0.184367	-0.152025	-1	-1	0.420643	-0.545785	0.00391203	0.144514	1.18829	1.18854	1.20839	-1	1.0714	0.336009	0.194655
Contig24-snapTAU.259	2.91924	3.04444	2.39097	1.81956	1.20165	1.6667	2.33207	2.40124	3.27105	2.0474	2.82078	2.64457	1.74364	1.67144	3.2895	2.31595	1.93034	2.74583	1.28453	1.68869	2.21913	1.87786	-0.166743	1.49799	1.53661	0.93375	1.06121	1.53153	2.43573	1.38615	0.864952	0.183925	0.328198	-0.110224	-0.667668	-0.348863	0.175064	0.446881
Contig24-snapTAU.265	3.98815	4.19192	3.77102	3.90777	3.73781	3.59018	4.13883	4.92098	4.86146	5.32163	4.41082	4.94194	5.45381	4.86075	4.76195	4.20329	4.31925	4.78054	3.99399	4.92566	4.81295	4.54306	3.74833	3.28438	3.84906	3.74022	3.0718	4.7972	5.27237	5.17757	5.329	4.51147	4.33318	4.17278	2.84531	2.97207	4.75861	4.66216
Contig24-snapTAU.280	-1	7.23878	-1	-1	-1	-1	-1	-1	-1	-1	-1	-1	-1	-1	-1	-1	-1	-1	-1	-1	-1	-1	-1	-1	-1	-1	-1	-1	-1	-1	-1	-1	-1	-1	-1	-1	-1	-1
Contig24-snapTAU.281	-1	-1	-1	-1	-1	-0.408532	-1	-1	-1	-1	-1	-1	-1	-1	-1	-1	-1	-1	-1	-1	-1	-1	-1	-1	-0.646808	-1	1.83699	-1	-1	-1	-1	-1	-1	-1	-1	-1	-0.909487	-1
Contig24-snapTAU.289	1.84443	-1	-1	-1	-1	-0.710539	-1	-0.163982	-0.138619	-0.182655	-0.672968	0.0104294	0.00775494	-0.605121	-1	-1	-1	-0.303992	-0.907205	-1	-0.568406	-0.730265	-1	-1	-0.835431	-0.419294	-1	-0.697672	-0.782419	-1	-1	-1	-0.677127	-0.790443	-1	-1	-1	-1
Contig24-snapTAU.333	-1	-1	-1	-1	-1	-1	-1	-1	-1	-1	0.840243	-1	2.60028	-1	0.285577	-1	-1	-1	-1	-1	-1	-1	-1	-1	-1	-1	-1	-1	-1	-1	-1	-1	-1	-0.267121	-1	-1	-1	-1
Contig24-snapTAU.335	0.405016	-1	-1	-1	-1	-0.154921	0.315691	-1	0.624734	0.153283	1.04197	0.282999	-1	-1	-0.3848	-1	-1	-1	-1	-1	1.3567	0.0449723	-0.557452	1.75832	0.679339	0.462318	-1	-0.284235	-0.115197	-0.603776	-1	-1	-1	-1	-1	-1	-1	-0.395828
Contig25-snapTAU.135	-1	-1	2.56442	-1	0.162211	-0.690336	0.194959	0.347776	-0.152754	-1	0.918945	-0.376812	0.690983	0.42332	1.29064	-0.54031	-1	0.906521	-1	0.291285	-0.640736	-0.472968	-0.178359	-1	0.174679	-0.38554	-0.770324	-0.395172	-0.339412	-0.679232	-0.168511	0.0206724	-0.0545716	-0.265248	0.279572	0.579466	-0.0746929	0.208354
Contig26-snap.189	2.34265	2.32272	2.5626	2.31365	1.11365	2.12534	0.142795	1.6875	0.493279	2.51982	2.40903	1.80551	2.60345	2.224	0.719559	2.01651	1.73063	0.910365	-0.572744	1.62406	1.49036	0.476717	1.15044	1.07254	0.877875	0.173265	0.191284	-0.720373	0.205346	0.758249	1.54902	-0.017081	0.422469	0.0904243	0.909884	-0.257363	-0.0188834	0.232264
Contig26-snap.68	2.2447	1.70326	2.5957	2.30126	2.0976	1.59267	1.77733	2.11451	1.33078	5.30569	1.78559	1.28156	1.51295	2.12858	3.29884	3.00312	2.18192	2.12308	2.27299	2.26807	2.47593	1.59318	2.03493	2.47179	2.45284	2.34491	1.85014	1.88126	1.85639	2.40404	2.36134	2.91819	2.75123	3.19014	2.35982	3.90451	2.80033	3.49321
Contig26-snapTAU.116	-1	-1	-1	-1	-1	-1	-1	-1	-1	-1	-1	-1	-1	-1	-1	-1	-1	-1	-1	-1	-0.813278	-0.80235	-1	-1	-1	0.634384	1.05941	1.81594	0.570313	1.91434	1.7173	3.12869	3.09593	3.21104	1.93769	2.56284	1.68989	-0.0413978
Contig26-snapTAU.120	2.05908	1.1497	-1	1.96781	1.3166	1.31489	0.810402	2.4434	1.69293	1.49611	0.959465	0.68907	-1	1.34039	1.51985	2.10453	2.71194	1.60999	-0.019089	0.200948	-1	1.00359	0.826027	1.51623	1.40988	1.40589	0.679375	0.845303	1.18183	0.91917	1.28372	0.918366	1.58804	1.43536	0.125737	1.61507	2.24092	1.25936
Contig26-snapTAU.158	-1	-1	-1	-1	-1	-1	-1	-1	-1	-1	-1	-1	-1	-1	-1	-1	-1	-1	-1	-1	-1	-1	-1	-1	-1	-1	-1	-1	2.15887	2.25712	2.3087	-0.416173	0.731351	-1	-1	-1	-1	-1
Contig26-snapTAU.159	1.43165	0.420413	-0.51153	1.88922	0.600055	2.18528	1.50455	2.49125	2.50137	1.58841	2.47639	1.77041	1.36163	2.01011	0.672614	-0.0975201	2.48747	1.69297	1.24977	1.49966	0.484786	0.895119	1.05569	1.18212	0.605867	0.0729662	1.01135	1.11999	1.86079	0.540888	1.2369	-0.0579238	0.00198481	-0.622533	-1	-1	-0.454874	-0.239508
Contig26-snapTAU.209	0.843069	-1	3.22086	1.52239	-1	0.210238	0.228106	0.591893	0.424575	-0.617478	-0.378803	-0.23239	-0.153892	-0.383279	-0.152265	1.06988	-0.0343433	-0.481018	0.0560801	-0.358753	-0.172265	-0.708039	-0.570898	-0.0188818	0.421702	-0.319504	-0.671649	-0.0709714	-0.404297	-0.658403	0.0286762	0.141937	0.576073	0.810137	-0.238895	0.0152328	0.979858	0.626724
Contig26-snapTAU.88	1.73773	0.3187	2.10859	0.461778	0.709939	0.208429	-0.0257535	0.490996	0.472181	1.06405	1.11649	0.0656994	0.329315	0.996666	0.903661	1.21432	0.747767	0.550908	0.656623	0.451424	0.681176	0.0112218	0.499414	0.880666	0.571586	0.182969	0.190118	0.0252779	0.432166	-0.0653068	0.172302	0.0664614	0.484609	1.48032	0.40216	0.728587	0.882114	0.554229
Contig27-snapTAU.161	1.47458	-1	-1	-1	-1	-1	-1	0.494321	0.112685	-1	-1	-0.725719	0.0891635	-1	-1	-1	-0.521363	-1	-1	-0.541688	-1	-0.56386	-1	-1	-1	-1	-0.276204	-1	-1	-0.930524	-0.645339	-1	-1	-0.422455	-1	-1	-0.769443	-1
Contig27-snapTAU.201	0.377597	-0.610549	0.626274	-0.610085	-0.0634878	-0.668027	-0.821595	-0.618788	-0.553754	-0.230364	0.0374468	-0.778447	0.459122	-0.59871	-0.594787	0.229444	0.149755	-0.198474	0.492369	-0.49987	0.116401	-0.133572	-0.669877	-0.0108195	-0.0330741	-0.0869394	-0.338979	-0.0280108	0.407444	0.660134	0.501738	1.0106	0.631498	1.11583	0.480012	0.118477	0.936498	1.17097
Contig27-snapTAU.202	4.88728	6.41998	7.82203	-1	4.45067	-1	-1	4.49586	3.78292	-1	-1	3.44821	5.51275	-1	4.30201	8.0988	8.30844	7.08558	-1	4.16997	5.89912	6.97105	-1	3.81103	4.39634	7.48588	5.13999	7.54354	4.54927	6.51982	5.75492	7.01037	4.35806	4.05627	3.27993	-1	4.55701	7.96558
Contig27-snapTAU.205	-1	-1	-1	-1	-1	-1	-1	0.498158	-1	-1	-1	-1	-1	-1	1.96958	-1	-1	0.794724	-1	-1	-1	-1	-1	-1	-0.122996	-1	-1	-0.0570184	-1	-0.947222	-1	-1	-0.338714	-1	-1	-0.325353	-0.865591	-0.412496
Contig27-snapTAU.206	0.0414678	-1	1.22926	-0.129767	-0.507403	-0.414939	-0.40065	-0.809898	-0.398916	-0.832625	-0.0493188	-0.0751233	-0.599653	-0.400206	2.40868	-0.830133	-0.697366	-0.222481	0.354801	-0.729995	0.166765	0.262627	-0.416091	-0.0840102	0.291063	-0.493041	0.0329722	0.42562	0.255741	0.0584569	0.142093	0.776723	0.640295	1.08621	-0.356016	0.0288795	0.852406	1.1902
Contig28-snap.129_truncated_curated	3.44175	3.74537	5.69561	3.93964	1.86381	1.39154	2.80586	2.05117	2.05386	1.90059	3.04417	2.22211	3.54933	2.87962	3.08882	2.87313	2.43033	2.33911	2.24276	1.89201	1.88932	1.54735	2.01628	2.35463	3.0548	1.44081	0.533185	1.52738	1.99803	2.50006	2.10481	1.5289	1.85854	1.91051	1.59681	1.02921	0.559248	0.537767
Contig28-snapTAU.160	1.56134	2.39953	2.94338	2.40711	1.40594	-0.386933	1.21432	0.994328	1.14346	1.9242	1.20367	1.16388	2.11348	1.65956	0.621454	1.04034	1.26606	0.341746	0.649925	1.13303	1.61638	0.330808	0.210185	1.5073	1.5295	0.427866	-0.0786917	-0.00803145	0.314325	-0.209558	0.50684	0.126511	-0.414191	1.90778	-1	-1	-0.0148103	0.67414
Contig28-snapTAU.57	1.65471	1.21308	-1	1.74336	-0.866018	-0.30634	1.99205	1.28503	1.59872	2.23118	0.370125	1.52294	0.644626	1.65397	0.0728962	0.327254	1.22146	1.52599	-0.244628	0.616528	1.18834	0.80261	0.596666	1.24987	1.35401	0.40558	1.01552	-0.0167861	0.0806044	-0.776256	-0.0708646	-0.18722	1.11538	1.57402	-0.0192592	0.170869	1.66846	0.238158
Contig28-snapTAU.58	-1	-1	-1	-1	-1	1.20316	-1	-1	-1	-1	-1	-1	2.19844	-1	-1	-1	-1	-1	-1	-1	4.08959	-1	-1	0.958043	-1	-1	-1	-1	-1	0.193762	-1	-1	-1	-1	-1	-1	-1	-1
Contig2886-snapTAU.1	1.50996	1.73128	-1	-1	-1	-0.426238	0.359539	0.349827	1.38959	1.77302	1.73548	1.02442	2.02358	2.80803	-1	0.872423	0.165261	1.13733	1.03296	0.681376	0.402756	-0.186124	1.06208	1.09274	0.164423	0.0417228	-0.203764	0.800196	0.825266	1.91285	0.738604	0.0271641	0.821545	0.586095	0.125333	1.58219	0.803721	1.31727
Contig3-snap.137	2.75043	2.7397	2.6288	3.32874	2.85226	2.59993	2.94794	3.29122	3.54138	3.08162	2.6066	2.87105	2.8254	3.34972	2.79822	2.9613	2.82013	3.52479	2.29401	3.1043	2.73799	2.57063	2.50747	2.24532	2.35964	1.66392	1.98397	2.47755	2.7304	1.71284	2.01284	1.7195	2.51384	1.8293	1.64645	1.17572	2.53615	2.24849
Contig3-snapTAU.142	3.46548	3.47575	4.00475	3.31424	4.98411	3.00919	3.60948	3.13536	3.60603	4.39881	4.06463	3.44721	3.6802	3.83158	3.9402	4.13451	3.753	4.03507	4.58171	4.26837	3.61422	2.51938	2.80138	3.21028	3.82225	2.96728	3.15032	3.61597	3.17987	3.2543	2.9725	2.86838	3.59291	4.06571	4.30547	2.91743	4.20525	4.18617
Contig3-snapTAU.188	2.44546	4.03566	4.04771	3.40244	3.37689	2.6822	3.57907	3.18445	3.72835	5.81077	2.90608	2.78676	2.54696	3.20244	3.36161	3.76034	5.05109	3.25213	3.9942	3.22997	3.10215	3.06706	3.15392	3.76622	3.898	3.71636	3.49883	3.70278	3.33528	3.54013	3.34633	3.71704	4.03988	4.11473	3.82689	5.23188	3.94893	4.40171
Contig3-snapTAU.192	-1	-1	-0.00321159	-1	-1	-0.536417	-1	-1	0.181404	-0.203383	-1	-1	-1	-0.277029	-0.372523	-0.623581	-0.199518	-1	-0.671368	-0.694245	0.362501	-0.564911	-0.634082	-0.437043	-1	-0.0763292	-0.314405	-1	-1	-0.761437	-0.605494	1.12089	-0.537205	0.41675	-1	-0.416839	-0.453205	-0.535802
Contig3-snapTAU.273	0.999089	-1	-1	-1	-1	-1	-1	-1	-0.773084	-1	0.352056	0.0973629	-1	-1	-1	-1	-1	-1	-1	-0.236242	-0.851086	-0.606828	-1	-0.885815	-1	-1	-1	-1	-0.783589	-0.644081	-1	-1	-1	-1	-1	-1	-1	-1
Contig3-snapTAU.31	-1	-1	-1	-1	-1	-0.348237	-0.378527	-0.84394	-1	-1	-1	-1	-1	-1	-1	-1	-1	0.531307	-1	-1	-1	-1	-1	-1	-1	-1	2.68794	0.431657	-1	1.74501	1.43114	3.25817	3.80093	3.22035	3.05933	3.26165	2.26652	0.388862
Contig3-snapTAU.319	2.42852	2.27475	3.02649	2.60203	1.49512	2.62426	2.72196	2.37465	2.5041	1.09782	2.14757	2.19857	2.78057	2.74809	1.68652	2.1003	2.23805	2.06183	2.15756	2.28677	1.79204	1.80692	1.60454	2.4296	2.04813	1.385	0.757093	0.765838	0.866962	0.131635	1.17845	0.209661	0.260888	0.776301	-0.0774657	0.61242	0.555018	0.490762
Contig3-snapTAU.38	5.33223	5.20473	6.13629	6.132	5.89903	5.37536	5.93041	6.11367	6.7164	6.40926	5.69633	5.80172	5.85638	6.12622	6.5463	6.63888	6.20452	6.73313	6.22193	6.44095	6.30248	5.86598	5.85878	5.9324	5.69753	5.67177	5.01179	6.1266	6.16919	5.67894	5.78428	4.77969	6.0119	5.88586	5.96174	4.66894	6.04347	5.79805
Contig3-snapTAU.39	-0.457366	-1	-1	-1	-0.376586	-0.0970103	-0.883375	-0.628012	-0.430399	-1	-0.37228	-1	0.455477	-0.883324	-1	-1	0.158572	0.101528	-0.63865	-0.404646	-0.194958	-0.626394	-0.762501	-0.587937	-0.36047	-0.397086	-0.976842	-0.667549	-0.826509	-0.561693	-0.799919	-0.618127	-1	-0.688748	-1	0.723672	-0.502853	-0.527596
Contig3-snapTAU.403	2.6839	1.12211	3.8004	2.75822	2.81042	2.77753	2.11528	2.34771	2.39748	2.80701	1.00276	1.87992	1.82652	2.55602	1.6821	2.35742	2.57112	1.61698	2.39078	2.28585	2.19293	1.60692	1.03697	1.48342	1.99907	1.62249	0.824846	1.82586	1.75839	0.85691	1.6548	1.53957	2.15194	2.42694	1.92031	1.35365	2.61356	2.46583
Contig3-snapTAU.41	0.159009	0.361195	1.15491	-1	-0.229304	0.631024	-0.384439	-1	0.430757	0.618666	0.0173372	0.177017	0.973934	-0.303303	-1	0.912635	1.03616	-0.334616	-1	-1	-1	-0.488355	0.179602	-0.0540241	-0.151443	-0.545054	-0.887958	-1	0.0449882	0.906877	-0.420003	-0.714175	-0.253867	0.194253	0.534224	-1	-0.0709685	0.256297
Contig3-snapTAU.98	1.19936	2.03846	2.33203	2.91368	1.4396	1.52154	0.919136	2.19506	2.03744	2.26056	1.58567	1.76923	1.77147	1.79816	1.91012	2.50323	2.5125	1.49454	2.71053	1.58175	1.8229	1.70058	1.64301	1.42387	2.47253	1.84903	0.911855	2.18882	2.05868	2.17474	2.05208	2.47308	2.55952	2.22217	2.57429	2.9493	3.64575	3.89862
Contig30-snapTAU.102	-1	-1	-1	0.0246384	-1	-0.610367	-1	-1	-1	0.516633	-1	-1	-1	-1	-1	-0.0485502	-1	-1	-1	-1	-0.435051	-1	-1	0.449075	-1	-0.0874754	-0.286006	0.240773	-1	0.08441	-1	-1	-1	-1	-1	-1	-0.939864	-1
Contig30-snapTAU.103	-1	-1	-1	-1	0.282788	-1	-1	-1	-1	-1	-1	-1	-1	-1	-1	-1	-1	-1	-1	-1	-1	-1	-1	-1	-1	-1	-0.775049	-1	-1	-1	-1	-1	-1	-1	-1	-1	-1	-1
Contig30-snapTAU.210	5.95647	8.7095	-1	8.52415	7.96874	7.29284	8.55078	7.55893	8.2533	7.43005	7.21579	6.50191	6.58199	6.82203	6.43886	6.70814	9.96986	6.36176	6.04366	6.41191	6.00917	5.6566	7.06602	7.04714	6.90052	6.86811	5.76532	5.78234	7.85163	5.8367	7.08923	6.00746	7.44597	7.34913	5.645	5.33471	6.12855	5.73349
Contig30-snapTAU.221	-1	-1	-1	-1	-1	-1	-1	-1	-0.0850212	-1	-1	-1	-1	-1	-1	-1	-1	-1	0.301852	-0.692611	-0.60648	-1	-1	-1	-1	-0.790912	-1	-1	-0.719384	-1	-1	-1	-1	-1	-1	-0.17306	-1	-1
Contig30-snapTAU.260	-1	-1	-1	1.01596	-1	-1	-1	-1	4.02672	-1	2.65519	-0.207299	0.442889	-1	-0.271306	-1	-1	-1	0.692985	0.202133	-1	-0.00581482	-1	-1	-0.341451	-1	-1	1.28168	2.51454	-0.489254	-1	-1	-1	-0.215573	-1	-1	-1	-1
Contig30-snapTAU.319	1.5328	-1	-1	-1	-1	-1	-1	-0.152109	-0.0518487	-1	-1	-0.517877	-1	-0.517193	-0.294315	-1	-0.240708	-0.386676	-1	-1	1.99428	0.158581	0.813364	-1	-1	-0.456278	-1	-1	-0.489786	-0.881219	-1	-1	0.290842	-1	-1	-1	-1	-0.524968
Contig31-snapTAU.125	-1	-1	-1	-1	-1	0.995045	0.884291	1.08034	1.36781	1.50625	-1	-0.0319308	-1	-1	1.1272	-1	-1	0.0152386	0.844421	-1	-1	-0.105807	1.8746	-1	-1	0.386041	-0.506599	-1	-1	-1	-1	-1	-1	-1	-1	-1	-1	-1
Contig31-snapTAU.192	3.70242	4.42561	3.76087	6.17666	5.20392	4.70933	5.01791	5.56288	5.91244	4.72865	4.38647	4.16932	4.0777	4.84184	4.84621	4.63768	4.00843	5.00318	4.57051	4.28132	4.23395	4.36734	4.10543	4.80579	4.98375	4.89855	4.88512	5.49253	5.31828	5.27493	5.21784	5.7094	5.90631	5.4997	4.68382	5.34719	6.07586	6.01432
Contig31-snapTAU.248	2.17155	2.78168	4.42662	2.18366	2.17008	1.94845	1.51544	2.3615	1.94029	3.05987	2.28312	1.63312	3.10745	2.71707	4.18497	3.23861	2.62998	2.08282	1.64081	1.75021	2.21945	2.09399	1.01017	2.38376	2.97049	1.9955	0.88917	1.59737	1.53016	1.19189	1.69226	2.00494	1.97018	2.50478	2.02681	1.82445	2.28677	1.87095
Contig31-snapTAU.249	2.72607	-1	3.38878	1.8843	3.25733	1.51195	2.26271	2.73779	3.25153	2.80833	3.31592	1.40756	1.6807	2.91835	2.08946	3.41982	3.04415	1.68697	1.83612	1.97887	1.53156	1.69789	1.32664	1.51467	0.922368	0.184071	1.84954	-0.379526	0.709928	0.206176	0.856526	0.175128	1.87284	1.729	1.41299	-1	2.45613	2.10938
Contig31-snapTAU.250	3.86601	4.07635	4.47659	4.18065	3.69339	3.89381	4.20166	4.35154	4.64247	3.68209	3.58094	3.50533	3.26193	4.02109	3.42661	4.56225	3.83646	3.24798	3.78428	3.93169	4.06241	4.24564	3.5448	4.04569	3.9808	3.13702	3.67394	4.12563	4.14743	3.18364	3.87819	2.67387	3.95949	3.83993	2.68333	2.90524	4.01544	4.08749
Contig31-snapTAU.282	3.11833	2.8653	3.85861	1.16767	1.31907	1.82929	1.16516	2.86939	2.05605	1.9463	1.51791	1.3772	2.96463	2.47624	4.50388	3.41942	3.21041	3.17491	2.26105	1.89092	2.23194	1.87326	2.16629	2.30984	2.49875	2.90496	1.62905	2.39861	2.33991	3.21497	2.92097	4.06472	2.96054	2.79433	3.55056	4.0537	3.43473	3.93921
Contig31-snapTAU.330	-1	-1	-1	-1	2.07875	-1	-1	-1	-1	3.06007	-1	-1	-1	-1	-1	-1	-1	-1	-1	2.63059	1.03308	1.86505	1.65523	3.47222	3.73892	3.31755	4.42823	3.9381	4.42272	5.34561	6.1201	4.62042	4.43551	5.3549	4.00687	4.91412	4.47955	4.42138
Contig31-snapTAU.337	2.57191	4.63807	5.07957	6.81714	3.61269	3.45615	3.76402	4.22406	4.28585	3.17686	3.84722	3.93113	3.70699	4.53867	4.44389	3.47333	4.01961	3.69203	4.62173	3.28018	3.74763	3.82694	3.60278	4.29854	4.22832	4.11399	3.06747	3.92917	3.95373	3.61724	3.55949	3.74201	3.77871	3.56411	3.90935	4.88531	4.30072	4.56118
Contig32-snapTAU.41	-1	-1	-1	-1	-1	-1	-1	-1	-1	-1	-1	-1	-1	-1	-0.411746	-1	-1	0.0306122	-1	-1	0.507964	-0.90051	-1	-0.867445	-0.747092	-1	-1	-1	-1	-1	-1	-1	-1	-1	-1	-1	-1	-1
Contig32-snapTAU.61	-1	-1	-1	0.93121	-1	-0.272025	-0.206889	-1	0.296704	-1	0.757736	0.141722	0.0436612	-1	-1	-1	-1	-1	-1	-0.284638	1.11315	-0.756879	-1	-1	-1	-1	-1	-1	-0.713756	-1	-1	-1	-1	-1	-1	-1	-1	-1
Contig320-snapTAU.1	0.510988	-1	3.11379	-1	1.27376	-1	0.695849	-1	-0.440762	-1	0.0618253	-1	-0.428546	1.10588	-0.775662	-1	-1	-1	-1	-1	-1	-1	-0.646556	0.193046	0.564981	-1	1.45402	-0.594369	-0.804877	-0.570195	-1	0.0963157	-0.204027	3.32369	0.219163	3.55646	-0.92559	-1
Contig33-snapTAU.1	1.64983	2.44353	-1	-1	5.566	1.60399	1.67587	2.31354	0.921845	0.466999	1.46003	1.12053	1.60089	2.21943	0.00383598	-0.103037	2.57548	0.930826	1.0135	1.4089	0.564982	1.70954	1.02623	-0.132012	1.25126	0.340337	1.43018	1.00057	1.11172	0.952153	2.27215	0.513204	1.34031	1.21672	0.886465	0.968336	1.41142	0.97969
Contig33-snapTAU.189	-0.19605	0.108703	0.445396	-1	-1	-0.554526	-0.305917	-0.680199	-0.518142	0.0976565	-0.312414	-0.772506	-1	-0.405794	-0.904675	-0.825403	-0.595624	-0.759705	-0.379186	-0.886016	-0.796476	-0.867567	-0.903013	-0.867974	-0.851522	-0.779227	-1	-1	-0.936267	-0.835671	-0.758258	-0.730172	-0.473074	-0.82396	-1	-1	-0.966747	-1
Contig33-snapTAU.36	0.653867	1.6338	2.28134	0.667908	0.498084	0.0463215	0.374241	0.299143	-0.217737	2.98336	2.35371	1.68908	1.49238	0.385811	2.89145	1.0285	0.776123	-0.466033	-0.156308	2.31251	1.08908	0.534312	0.227221	0.107687	-0.0808618	-0.24222	-0.25048	-0.586542	0.14595	0.545557	0.164401	-0.569582	0.571084	0.75735	1.92784	0.703774	0.0057902	-0.195445
Contig34-snap.12	3.32987	1.96234	3.21287	3.56739	2.23029	1.77722	2.7791	2.47689	3.39551	2.11506	2.31656	1.99342	2.93682	1.87354	3.00135	1.98646	2.77142	0.507011	1.73938	2.838	2.6299	1.5671	2.16846	1.41831	2.20637	1.17356	-0.141183	1.28843	2.47826	1.42039	2.2059	0.654479	1.30738	1.36993	1.05931	1.44178	1.07912	1.29538
Contig35-snap.117	9.09232	8.86122	6.43906	7.45753	8.44719	7.05892	6.09093	7.81786	4.57645	3.86443	4.46705	7.92777	6.31691	9.5002	6.688	5.81377	7.35707	4.70566	2.60045	4.24806	5.59959	6.01344	6.98861	6.0667	2.7977	4.16091	2.8222	3.46689	5.39121	5.55865	6.88314	3.84494	6.28679	6.88338	5.53113	5.07771	4.89362	4.00476
Contig35-snap.98	3.88495	3.53613	4.70621	4.61555	4.27588	4.08462	4.93043	5.1686	5.5083	5.11926	4.41344	3.89085	3.71872	4.82034	4.70396	4.33027	3.83464	4.73605	4.5805	4.18924	4.16603	4.09964	3.60287	4.10082	4.85066	4.559	4.20368	5.33963	5.07123	5.1445	5.23369	5.64803	5.89594	5.45756	5.50447	6.01588	6.01928	6.18466
Contig35-snapTAU.13	-1	-1	0.712854	-1	-0.933754	1.55937	1.09464	1.41147	1.10836	0.626753	-1	1.22658	-0.134346	-1	-0.513459	-1	1.32806	2.28771	-1	-0.0397678	-1	-0.736465	-1	-1	0.796584	1.8687	1.80455	1.34755	-0.383124	-1	-0.147062	-1	-1	-1	-1	-1	-1	-1
Contig35-snapTAU.234	1.05718	-1	-1	-1	0.4158	0.858193	1.16623	0.741453	1.24629	1.87952	3.08736	0.942036	0.941524	1.19501	0.364699	-0.320027	-0.139124	0.634002	-1	-0.628935	-1	0.0049637	0.803349	-0.529275	-0.304249	-0.270127	-0.3582	0.618865	1.18929	-0.0529534	1.42021	0.765458	0.563025	0.748747	0.901761	1.10047	1.08976	0.973349
Contig35-snapTAU.242	-1	-1	-1	1.05002	3.94293	1.29353	0.98026	-1	1.30856	-1	-1	-1	-1	-1	1.77307	2.55617	3.83645	1.05631	0.763691	1.20342	-1	0.398527	-1	0.791711	-1	0.687758	-1	-0.200043	-0.232092	-1	-1	-1	-1	-1	1.39409	-1	-1	-1
Contig35-snapTAU.256	2.96225	2.87134	5.35863	2.29775	2.178	1.09163	1.80863	2.67252	3.37861	3.2163	3.23741	2.5937	2.34105	2.82998	2.78618	2.87008	0.71675	1.80608	1.8762	1.23249	1.96657	0.177256	1.63918	0.893617	0.948774	1.19484	1.3229	1.39572	0.693241	0.853014	1.08131	0.0903385	0.669892	-0.116399	-1	0.681398	-0.714637	-0.25422
Contig35-snapTAU.280	2.41915	3.66466	3.59836	5.32148	4.68132	2.83247	2.85397	3.19168	2.86259	6.74247	2.29926	1.96173	2.30539	1.9914	3.60854	3.07423	5.78436	4.01406	4.3013	2.67184	3.10065	3.27142	3.50299	3.21703	4.03031	4.18865	3.95636	5.00246	4.04937	5.0154	4.68232	6.11171	5.03402	5.3763	4.5163	6.40334	5.43653	6.07412
Contig35-snapTAU.328	2.85565	3.87162	4.54006	4.12248	4.28008	3.86532	4.21482	4.07142	4.50739	3.73394	2.88052	2.92256	2.98221	3.63111	3.69332	3.66333	3.7892	4.20415	3.77469	3.92987	3.71147	3.41685	2.59006	3.40469	3.74106	3.40389	2.29351	3.45629	3.46646	2.39192	2.78351	1.76854	3.35133	2.68341	2.78078	2.92827	3.50022	3.46483
Contig35-snapTAU.64	4.89458	4.18081	-1	4.42057	1.77637	1.24092	2.94131	3.02836	3.8497	0.469777	4.4263	2.1451	2.29256	2.39186	0.543228	2.79653	-1	2.63529	0.63309	-0.182968	2.10204	0.55888	1.8003	1.19399	0.268432	1.20284	1.96318	-1	-1	1.91116	-1	0.32425	1.54729	0.879933	-1	0.941958	0.740032	1.05628
Contig36-snap.200	1.9879	3.74718	5.71761	-1	-0.873581	1.58873	-0.238616	-1	0.938699	-1	-1	0.791478	3.87684	-1	0.709128	-1	-1	2.07455	-1	0.764412	-1	-1	1.32814	-1	-1	-1	-1	-1	-1	-1	-1	-1	-1	0.611395	-1	-1	-0.682667	-1
Contig36-snapTAU.125	3.79763	5.3186	5.37394	5.73748	6.32911	3.98055	4.31671	4.54929	4.53547	4.87628	4.65922	3.9433	4.30945	5.367	4.72238	4.82348	4.35184	4.32406	3.87359	4.32638	3.83218	4.07564	4.54516	5.46556	5.07407	4.86439	5.35046	5.16485	5.17024	4.96204	4.6223	5.39205	4.97928	5.30649	5.30841	5.34293	5.69296	6.31616
Contig36-snapTAU.145	2.22207	2.0524	3.37955	2.06223	1.80643	2.48867	2.36949	2.59155	3.3205	3.30043	2.68058	2.21753	1.90994	2.5247	3.50991	3.6988	5.15748	3.11285	3.06535	3.38679	2.7978	2.51753	2.23465	2.78177	2.25212	1.626	2.16319	2.87865	2.82564	2.52715	2.90304	2.70622	2.54761	2.32894	2.43821	2.20829	2.90222	2.99406
Contig36-snapTAU.150	2.35484	3.46159	4.57044	2.50761	2.58268	2.61501	2.36323	2.58509	2.46229	2.18801	1.75596	1.6061	2.41305	2.64984	3.12987	3.32608	3.08833	2.72876	2.03253	2.31509	2.55787	1.5272	1.92004	2.63976	2.51658	2.54276	2.01751	1.97238	1.82797	1.8976	1.94013	2.58434	2.51568	2.85687	3.68438	2.61914	2.68935	2.82543
Contig36-snapTAU.177	-1	-1	-1	-1	-1	-1	-1	-1	-1	-1	-1	-1	1.90761	1.1262	-1	-1	0.84512	-1	-1	-0.311615	1.40753	-1	-1	-0.619799	-1	-1	-1	-1	-1	-1	0.660474	-1	-1	-1	-1	-1	-0.806875	-1
Contig36-snapTAU.88	1.88092	3.33223	2.42092	0.936598	0.466268	0.468971	1.12443	1.80106	1.53703	1.26761	1.39376	0.541513	0.922017	1.70692	2.09724	2.2802	4.29888	3.08587	2.22056	1.12077	1.70288	0.914494	1.372	2.07391	2.44112	2.49173	0.945068	2.54917	0.970165	1.21687	1.68726	0.124834	0.564142	0.416559	1.39857	1.66269	0.194518	0.288484
Contig36-snapTAU.90	3.01477	-1	-1	-1	-1	-1	0.327489	-0.414338	-0.382798	0.56747	-1	0.208623	-1	-0.59083	0.313753	0.279086	-1	1.11041	-1	-1	-1	-0.750098	0.574248	-0.409729	-0.376674	-0.279478	-1	0.298226	0.00369404	0.101815	1.0861	-0.0675793	0.618455	2.04674	1.3218	2.19492	0.624343	1.05478
Contig37-snapTAU.187	-0.934289	-0.603986	-0.959855	-0.847951	-0.998385	-0.983909	-1	-0.969692	-0.834352	-1	-0.861453	-0.982282	-0.749783	-0.817787	-0.871418	-0.749658	-0.773698	-0.708876	-1	-0.888763	-0.903179	-0.94623	-0.921771	-0.78147	-0.770415	-0.737943	-0.948906	-0.80484	-0.952066	-1	-0.881494	-0.872206	-0.902723	-0.891844	-0.98201	-0.960229	-0.938146	-0.947331
Contig37-snapTAU.188	2.05963	3.71579	-0.0378711	0.185291	-0.972243	0.0995969	0.983821	2.14682	1.40997	2.57538	1.5585	1.57961	1.15376	1.34601	2.2835	0.629179	-1	0.670333	1.22063	0.450375	0.421568	-0.777899	1.48589	-1	1.04536	0.028389	-0.176369	1.1131	0.0164469	0.266125	0.523215	0.537402	0.522385	0.818134	0.462242	-1	0.0317642	-0.206544
Contig37-snapTAU.206	4.15238	4.48208	5.05533	4.66505	4.08852	3.28049	3.73987	3.90413	4.39897	5.45865	4.19791	3.95593	4.15897	4.35528	4.30184	4.60636	4.47869	4.24228	4.63805	4.08853	4.54356	4.22322	4.32019	4.6774	5.39181	5.54996	5.14035	6.08029	5.39161	6.30929	5.82554	6.76392	6.36368	6.57833	5.93585	7.30416	6.58786	6.95861
Contig37-snapTAU.234	3.62382	4.21343	4.85948	3.35697	3.95582	3.41727	3.97709	3.87819	4.20798	3.98554	3.96436	3.94803	3.16519	4.31173	4.87601	4.07008	3.9452	3.87445	4.14805	3.59187	4.49476	3.70409	3.46168	3.62006	3.699	3.32018	3.10712	3.97367	3.46797	3.42729	3.37833	4.42842	4.09151	3.73146	5.31251	4.65207	4.60548	4.57811
Contig38-snapTAU.119	-1	-1	-1	-1	-1	-1	-1	-1	-1	-1	-1	-1	-1	-1	-0.610309	-1	-0.257959	-1	-1	-1	-1	-0.0690151	-1	-1	-1	-1	-1	0.100289	-0.10968	-1	0.356267	-0.72034	-1	-0.495407	-1	-1	-0.545822	-0.748723
Contig38-snapTAU.214	1.1556	-1	-1	1.50482	-0.764146	-0.187895	-0.229517	0.48333	0.249749	0.261729	-1	0.00985138	-0.623876	0.266322	0.386485	0.789068	-1	-1	-0.797799	-0.447335	1.2328	-0.501758	-1	-1	-1	-1	-0.281474	-1	-1	-1	-0.591141	-1	-1	-1	-1	-1	-0.910411	-1
Contig38-snapTAU.9	-1	-1	-1	-1	-1	-1	-1	-1	-1	-1	-1	-1	-1	-1	-1	-1	-1	-1	-1	-1	-1	-1	-1	-1	-1	-1	-1	-1	-1	2.70191	-1	-1	-1	2.11329	-1	1.58437	0.0933967	-1
Contig39-snapTAU.178	-1	-1	-1	-0.331747	-0.0954241	0.344903	-0.0507891	0.407508	0.0137647	-1	-0.271903	-0.499922	0.272317	-0.821799	-0.732209	-0.573839	-0.268113	-0.285294	-0.153125	-0.0991477	0.61727	-0.164508	-0.137802	0.163736	0.0120579	-0.110727	0.620039	1.82629	0.960923	1.69939	1.13582	0.543853	0.921337	-0.268213	-0.319143	-1	-0.605385	0.0548777
Contig4-snapTAU.395	-1	-1	-1	-1	-1	-1	-1	-1	-1	3.91681	-1	-1	-1	-1	-1	-1	-1	-1	-1	-0.0265114	-1	-1	-1	-1	-1	-1	-1	-1	-1	-1	-1	-1	-1	-1	-1	1.80422	-1	-1
Contig40-snapTAU.183	-1	-1	4.34698	-1	-1	-1	-0.756207	-1	-1	-1	-1	-1	0.637075	-1	0.39268	0.612692	-1	-1	-1	-0.317301	0.295724	1.06123	-0.376495	-0.110018	0.474362	-0.227035	-0.593993	-0.193702	-1	0.649044	-0.411302	-1	-1	0.584143	0.0691479	0.13286	-0.392786	-0.186888
Contig40-snapTAU.204	3.57464	1.65909	3.36558	1.85803	0.764074	0.369005	0.20796	1.01502	0.313894	1.32211	2.31047	1.43688	1.56938	1.30169	1.14356	1.73587	1.07113	0.818023	1.07193	1.87617	2.2939	1.91713	1.48226	2.04054	0.866229	0.472742	-0.358389	-0.203919	-0.213754	1.62657	1.16801	1.45443	0.156698	0.749442	0.479378	0.500245	0.44262	0.818805
Contig40-snapTAU.205	0.869154	0.819791	2.52602	0.663128	-0.976393	-0.0471508	-0.0919602	-0.541494	0.42082	-1	0.411455	0.330239	0.79451	0.504615	-0.00278724	1.22887	-1	-0.574329	-0.727164	-0.0974838	0.360716	0.172209	0.798269	0.221676	0.246074	-1	-1	-1	-0.577923	-0.496868	-0.564184	-0.469857	-0.2067	0.29	0.693025	1.45474	-0.491611	-0.498018
Contig40-snapTAU.4	-1	-1	-1	-1	-1	-1	-1	-1	-1	-1	-1	-1	-1	-1	-1	-1	-1	-1	-1	-1	-1	-1	-1	-1	-1	0.0349483	0.0799889	-0.311018	-1	-0.544519	-0.0167339	-1	-1	-1	-1	-1	-0.522013	-0.0979304
Contig41-snap.70	4.50997	5.17177	4.27046	4.91589	4.55813	4.62649	4.79057	5.10975	5.42555	5.12957	4.02161	4.25005	4.14984	5.08125	4.65568	4.74794	4.37573	4.65958	4.51515	4.36583	4.65375	4.25415	3.59549	3.95284	3.53653	2.93086	3.19848	4.12586	4.0092	2.65597	3.57048	3.3829	4.61187	4.09656	2.40108	2.6549	4.51582	4.1748
Contig41-snapTAU.130	4.09854	4.30363	5.98433	4.36584	4.00757	4.02604	4.64103	4.54525	5.1121	4.89824	4.61302	4.35111	4.73987	4.7811	4.16553	4.8936	5.05516	5.2102	4.73332	4.47187	4.72518	4.35695	4.85371	4.27404	4.90943	4.37028	3.83851	5.04577	4.35116	4.5931	3.96958	5.3743	5.08607	5.01064	4.94958	3.9321	5.21175	5.63101
Contig41-snapTAU.214	2.64054	1.76612	-1	0.95296	1.31279	1.59935	2.19256	1.77275	1.11045	1.77793	3.00075	3.06185	2.97542	3.23625	2.37941	2.69029	1.37284	1.944	1.39489	3.43961	3.77936	2.26347	3.04954	2.03498	0.791309	0.457818	1.53711	-0.425713	1.51692	0.653803	1.73062	-0.126509	0.055527	-0.661286	-0.741858	-1	-0.343762	-0.0320355
Contig41-snapTAU.215	2.57483	3.93983	5.89219	4.01056	2.69381	1.84143	1.8824	3.94683	3.87894	1.82687	3.6393	4.22638	3.00594	3.07654	0.850972	3.29676	2.3082	3.23385	0.783258	2.23709	1.35217	1.41868	2.37781	1.53709	1.8778	1.19026	2.23399	1.3249	0.809346	0.98346	1.88893	0.131019	-1	0.831033	-0.0640077	-1	0.932307	1.03163
Contig41-snapTAU.31	1.50538	-1	-1	-1	-0.656026	1.50873	0.0197663	1.44652	1.29917	0.110042	-1	1.0831	0.968452	0.691692	0.596201	0.198162	-1	0.497668	0.844239	0.775349	0.783431	-0.293773	-1	0.556185	0.479445	0.0759228	0.13314	-1	-1	-1	-1	-1	-1	-1	-1	-1	-0.430644	-0.194645
Contig41-snapTAU.68	-1	3.12794	-1	-1	-1	-0.00533707	-1	-1	-0.185437	2.90133	-1	-1	-1	0.898332	-1	-1	-1	-1	0.763691	-1	-1	-1	-1	-1	-1	-1	-1	-1	-1	-1	-0.200527	-1	0.0498027	-1	-1	-1	-0.824292	-1
Contig41-snapTAU.80	1.29611	1.65524	2.6283	2.18685	2.24651	1.95814	0.920704	2.31035	2.94213	2.12867	1.11193	1.75197	2.12032	2.7365	2.46628	1.93338	0.216073	1.82102	1.09969	1.34147	1.07411	1.63102	1.38973	1.73968	0.919952	0.0716471	1.73265	0.0829994	0.882261	0.653293	1.6147	0.758522	1.60555	1.10718	1.27063	1.47911	0.821384	0.971085
Contig42-snap.101	4.555	3.75363	4.82871	3.00406	2.80119	3.05377	2.52085	2.88338	2.97993	2.68541	2.58906	2.81742	2.91339	2.0784	1.71087	2.10556	2.60783	2.72324	1.61108	1.98668	2.47431	1.63114	1.93355	1.50363	2.01344	1.66971	0.926498	0.969761	0.480579	0.864342	0.857112	0.657183	0.311922	0.836628	1.15117	0.32755	0.982099	0.78541
Contig42-snapTAU.124	10.1661	10.6608	11.0601	10.8874	9.56605	9.15314	9.60124	9.69823	10.0899	10.2646	9.69448	9.47853	9.78234	10.5225	10.0277	10.7175	10.4457	9.99961	9.7324	9.97973	10.5372	9.25508	9.69656	10.2428	9.99636	9.55515	9.23454	10.0348	9.26791	9.84243	9.5674	10.0359	10.2805	9.76486	10.5039	9.02196	9.85743	9.85109
Contig42-snapTAU.125	5.23506	5.59235	3.60473	5.15994	5.20831	4.10394	4.86117	5.45254	4.79296	5.39673	3.23492	5.1981	4.98794	5.86334	5.10239	5.94846	4.14711	5.68198	4.33737	5.20005	5.44379	5.3379	4.43053	4.86087	4.4699	3.88073	4.21311	5.25737	4.89773	5.06717	5.10451	4.93471	5.68719	5.37826	5.63856	5.46901	7.1235	7.51597
Contig42-snapTAU.149	-1	-1	-1	-1	-1	-1	-1	0.906643	-1	-1	1.32324	-1	2.08132	-1	-1	2.12962	0.460666	-1	-1	1.94053	-1	1.00972	-1	0.773842	1.58344	-1	1.83282	2.30529	1.30603	-1	1.17309	2.59276	0.452815	-1	-1	-1	1.32713	-1
Contig42-snapTAU.2	2.44841	2.95052	3.17056	1.97694	0.0645586	1.28895	0.816089	1.04056	0.704653	0.792005	1.23548	0.239657	1.02295	0.857336	1.05984	1.72924	1.94371	1.42017	0.459858	1.30279	1.23227	0.780309	0.858321	1.98779	1.29439	1.28963	0.619803	1.73907	0.677242	0.720775	1.196	2.04955	1.60909	1.71142	1.10023	1.31305	2.67245	2.35373
Contig42-snapTAU.20	2.10899	1.22776	0.218464	0.464908	0.231005	0.604664	1.49751	2.10547	1.33102	0.632403	0.87636	1.26776	2.66762	2.69869	2.50312	0.627817	0.830554	0.427376	0.55182	1.57076	1.06186	0.654795	1.29185	1.33222	-0.223705	0.379254	-0.285803	0.380868	1.23317	0.591628	1.74135	-0.546768	-0.0888513	-0.654621	-1	-1	-0.238362	-0.634902
Contig42-snapTAU.246	-1	-1	-1	-1	-1	-1	-1	1.12191	-1	0.855376	-1	-1	-1	-1	-1	-1	-1	-1	-1	-1	-1	-1	-1	-1	-1	-1	-0.172915	-1	-1	-1	-1	-1	-1	-1	-1	0.0625436	-1	-1
Contig42-snapTAU.52	0.318863	-1	-1	-1	0.058229	-0.778521	-0.540985	-1	0.644365	-0.423964	0.349963	-0.382265	1.16647	-1	-0.630115	-1	-1	-0.141946	-1	-0.616872	-0.84089	-1	-0.739989	-1	-1	-0.296259	-0.699699	-1	0.0168747	-1	-0.304005	-1	-1	-1	-1	-1	-1	-1
Contig42-snapTAU.61	-1	-1	3.25559	-1	-1	-0.0812951	-0.417087	0.528433	-0.132161	-0.410769	-0.250735	0.548017	1.80282	0.995334	1.94848	2.73508	2.12291	-0.422055	-0.718897	-0.402722	0.305729	0.612036	1.19908	2.23974	2.41432	0.451949	0.795705	-0.649201	-0.0765795	0.828347	0.372253	1.85145	1.58165	2.29137	2.81679	1.12817	1.61683	1.15433
Contig42-snapTAU.77	-1	-1	-1	-1	1.50319	0.924866	-1	-0.763206	0.58748	-1	1.18139	-0.499093	-1	-1	-0.215249	-1	-0.741525	-1	-1	-1	-0.42688	-1	-1	0.0294621	-0.176609	-1	-0.648689	-1	-0.686369	-1	-0.704036	-1	0.460584	-1	-1	-1	-0.249273	-0.727579
Contig42-snapTAU.80	-1	-1	1.91696	-1	-1	-1	-1	-1	-1	-0.0107564	-1	-1	1.31969	-1	-1	-1	-1	-0.362822	-1	-1	-0.14279	-0.700065	0.141676	-1	-1	-1	-1	-1	-1	-1	-1	-1	-1	-1	-1	-1	-1	-1
Contig43-snapTAU.175	-1	-1	-1	-1	-1	-1	-1	-1	-1	-1	-1	-1	-1	-1	-1	-1	1.17236	-1	-1	-1	-1	-1	-1	-1	-1	-0.0424395	-1	-1	-1	-1	-1	-1	-1	-1	-0.510863	-1	-1	-1
Contig43-snapTAU.176	-1	-1	-1	-1	-0.944299	-1	-0.48975	-0.003575	0.802497	-1	0.016071	0.644254	0.619041	0.2972	0.126115	-1	-1	-0.200703	-1	0.342057	-1	-1	0.259386	-1	-1	-0.146407	-1	-0.284385	-1	-1	-1	-0.314586	-0.439991	-1	-0.0821277	-1	-1	-1
Contig44-snapTAU.177	-1	-1	-1	-1	-1	-1	-1	-1	-1	-1	-1	-1	-1	-1	-1	-1	-1	-1	-0.219407	-1	-1	-1	-1	-1	-1	-0.526676	-0.748575	0.806044	0.349861	2.85056	1.28253	2.37174	2.25471	1.50416	0.814146	1.0879	0.306201	-0.725287
Contig44-snapTAU.199	4.3812	4.86781	3.25558	6.21751	5.73295	5.97959	5.80335	6.32257	6.46368	5.40772	6.14506	5.58345	5.01367	6.01583	6.11716	5.44021	5.96309	5.5735	5.40693	5.56923	5.25209	5.29518	5.08818	5.30628	5.44104	5.12481	5.43136	5.20919	5.95065	4.41776	4.84159	3.80903	5.05377	3.87954	3.48647	4.3664	5.1955	5.21702
Contig44-snapTAU.86	4.10417	4.20476	4.50188	2.94864	2.10287	3.05453	2.40444	3.65363	3.06526	3.5196	2.73154	3.15709	2.33589	2.55048	4.33371	3.45051	3.79962	3.16374	3.37751	2.71287	2.9999	2.91867	3.42771	3.1943	3.69811	3.54877	3.15373	4.49369	3.63841	4.38477	4.12613	3.98193	4.27432	4.67418	3.94892	4.28359	5.47805	5.48734
Contig45-snapTAU.114	-1	-1	-1	-1	-0.906132	-0.290246	-0.405228	-0.640207	-0.0931262	-1	-1	-0.466108	-0.121916	-1	-1	-1	-0.308654	-1	-1	-0.08525	-1	-1	-1	-1	0.165836	-0.0875135	-0.867256	-0.362277	-0.638337	-1	-1	-1	-1	0.3061	-0.536122	-1	-0.394224	0.230213
Contig45-snapTAU.2	1.45812	2.24574	-1	-1	-0.977382	-1	-1	-1	-1	-1	-0.531224	-0.0802213	-0.520138	-1	-1	-1	0.291676	-1	-1	-0.108319	-1	-1	-0.647907	-1	-0.534571	-0.552456	-1	-1	-1	-1	-1	-1	-1	-1	-1	-1	-1	-1
Contig45-snapTAU.234	-1	2.86703	-1	-1	-1	-1	-1	1.13964	-1	-1	-1	-1	-1	-1	-1	-1	-1	-1	-1	-1	-1	-1	-1	-1	-1	-1	2.74909	0.511484	-1	-1	-1	-1	-1	2.65312	-1	-1	-1	-1
Contig45-snapTAU.35	-1	-1	-1	-1	-0.959971	-1	-1	-1	-1	-1	-1	0.304907	-1	-1	-1	-1	-1	-1	-1	-1	-1	-1	-1	-0.276154	0.032613	-1	-1	-1	-1	-1	-1	-1	-1	-1	-1	-1	-1	-1
Contig46-snapTAU.10	-1	-1	-1	-1	-1	-1	-1	-1	0.033083	-1	0.335179	1.14018	1.62816	-1	-1	-1	-1	-1	-1	0.37327	0.591439	-1	-1	-1	-1	-0.652206	-1	-0.667642	-0.832417	-0.0236561	-0.733505	-1	-1	-1	-1	-1	-1	-1
Contig46-snapTAU.11	-1	-1	-1	-1	-1	-1	-1	-1	0.4757	-1	-1	-1	-1	-1	-1	-1	-0.591232	-0.777505	-1	-1	-1	-0.823702	-0.883162	-1	-1	-1	-1	-1	-1	-1	-1	-1	-0.809482	-1	-1	-1	-1	-1
Contig46-snapTAU.99	1.41278	0.789358	2.34258	0.693836	0.873256	0.702281	1.69108	1.4265	2.02626	1.97383	1.6219	1.50995	1.70877	1.91268	2.4452	1.48137	1.63605	1.41704	2.21646	2.22625	1.77983	1.08234	0.74752	1.01747	0.961544	0.688993	0.599047	1.18886	1.25796	0.509314	1.12164	1.26936	1.29124	2.09051	0.296258	-0.0270105	1.66336	1.54243
Contig47-snapTAU.145	3.02915	3.50515	4.36569	3.41337	1.02392	2.12084	2.44838	3.34229	3.50484	3.14167	2.8273	2.59652	2.13677	2.19085	2.68908	2.85121	2.05523	2.53316	2.18663	1.61958	2.45512	2.09063	1.75653	2.33567	2.22195	2.59501	2.27033	3.11338	2.80814	3.29853	3.53348	4.00356	3.46468	2.74666	3.31518	3.96922	3.44305	3.86847
Contig47-snapTAU.158	2.20542	-1	-1	-1	-1	-1	-1	-1	-1	-1	-1	0.0672854	0.188476	1.58928	-0.0836463	-1	-1	-1	-1	-1	-1	-1	0.730665	-0.625404	-1	-1	-1	-1	-1	-0.00328506	-0.75634	1.38839	-1	-1	-1	-1	-0.901882	-1
Contig47-snapTAU.201	0.549502	1.11531	-1	-1	0.292908	-0.323972	0.145226	0.592175	0.422846	0.45746	-0.267708	-0.415963	-0.432553	-0.313744	-0.149515	-1	-0.58804	-0.388676	-0.212301	-0.404489	-0.585978	-0.366639	-0.404559	-0.429041	-0.627009	-0.376148	-0.68457	-0.171939	-0.566876	0.289501	-0.0400248	-0.0890511	-0.238441	0.193471	-0.659402	-0.0481193	-0.210041	0.0557899
Contig47-snapTAU.83	-1	3.31956	4.15686	-1	-0.922209	-1	0.423271	-1	-1	2.17377	0.340772	0.663766	-1	-0.170424	0.268911	1.16322	1.25809	-1	-1	0.297644	-0.50132	-0.559539	1.71935	1.27989	-0.246772	-1	-1	-1	-1	-1	0.193554	-1	-1	-1	-1	-1	-0.622841	-1
Contig48-snapTAU.147	-1	-1	-1	-1	-1	-1	-0.781452	-0.376855	-1	-1	-1	-1	-1	-1	-1	0.542014	-1	-0.653423	-1	-0.151075	-0.41882	-1	-1	-1	-0.799038	-0.403599	-1	-1	-1	-1	-1	-1	-1	-1	-1	-1	-1	-1
Contig48-snapTAU.169	1.52794	3.77325	2.1379	2.58468	1.46311	1.72465	2.62379	2.00216	2.51454	2.21331	2.17985	1.78288	2.1347	2.09381	1.76716	2.84915	2.39116	2.26576	2.15857	1.96779	1.87931	1.67086	1.59358	1.36657	2.02884	1.81855	0.938242	1.69223	2.09858	1.54927	1.66704	1.98855	2.22941	1.94233	2.23133	2.48532	2.59868	2.42003
Contig48-snapTAU.5	-1	-1	-1	-1	6.87257	-1	-1	-1	-1	-1	-1	-1	-1	0.839613	-1	-1	-1	-1	-1	-1	2.07793	-1	-0.111823	-1	-1	-1	-1	-1	-0.135369	0.471488	-1	-1	-1	-1	-1	-1	-1	-1
Contig49-snapTAU.9	2.35768	3.20325	-1	0.516733	2.76596	2.21441	2.19087	3.35207	3.01831	3.78377	2.9723	3.6183	3.25275	2.91675	0.372392	0.400624	2.00748	2.59656	2.15173	1.05595	0.76803	0.50086	0.923207	0.102522	0.177593	-0.155719	1.21755	0.312283	1.53802	0.451597	-0.436962	0.0677323	0.528262	1.2742	-0.0312159	-0.23396	0.816474	0.945871
Contig495-snapTAU.1	-1	-1	-1	-1	-1	-1	-1	-1	-1	-1	-1	-1	-1	-1	-1	-1	-1	0.502743	-0.710112	-1	0.300323	-1	-1	-1	-1	-0.395183	-1	-0.333515	-1	-1	-0.717611	-1	-1	-0.373233	-1	-1	-0.396334	-1
Contig495-snapTAU.3	2.94614	4.49634	-1	2.27277	-1	1.11884	1.09755	2.30504	2.02026	1.78051	3.18505	2.70235	3.14345	2.99602	3.95779	3.23372	3.28977	1.30005	1.79926	3.18926	3.95067	2.36551	1.60541	2.35637	2.17192	3.30852	2.37127	4.1719	3.6989	3.19883	2.41186	2.82421	2.91046	3.33556	2.70997	3.99492	4.04481	2.75121
Contig5-snapTAU.142	1.7406	2.5638	-1	0.620785	6.20596	1.26169	1.1003	1.24914	1.14137	-0.345228	2.05629	0.843836	1.88785	1.14973	1.5258	1.69552	1.13179	0.44774	-1	1.59881	2.47815	1.01073	0.174476	0.831288	1.06873	1.15555	-0.117025	0.565045	1.33587	0.914405	-0.00983927	1.63502	1.21805	1.23675	0.663757	1.50425	0.657419	0.671278
Contig5-snapTAU.276	3.41487	0.963633	2.59941	1.69043	1.78134	1.77307	2.66933	0.405564	2.0147	1.16818	1.29434	1.59528	2.25	2.57867	2.27212	2.2485	2.16628	2.32603	0.703449	1.19224	2.08488	1.09527	2.03596	1.21492	1.53103	0.221513	1.1256	0.0238823	0.784386	0.770125	1.18445	0.597411	1.05817	-0.474947	-0.383447	-0.0157678	-0.112314	0.111153
Contig5-snapTAU.41	3.61946	3.3175	1.56909	2.74994	0.81631	2.80278	2.19819	2.58729	2.31664	3.047	3.45127	2.35338	4.02811	3.19003	3.6834	3.29869	2.60982	2.43209	0.859482	2.57278	2.8967	2.10921	3.08551	2.36581	3.06676	1.55461	1.48646	1.59434	2.34397	2.28308	2.42128	1.69094	0.965664	0.202716	-1	1.60975	1.24952	0.775045
Contig5-snapTAU.419	-1	3.05606	-1	-1	-1	0.255739	1.87494	-1	0.592649	1.72788	2.7378	2.71395	1.91719	0.687284	2.28768	-1	3.18994	-1	-1	1.46931	2.60915	1.0031	2.69132	1.81015	2.19313	1.17119	2.36431	4.74758	5.62365	2.60535	5.39652	0.97535	2.03257	-1	-1	1.15574	0.29798	0.290471
Contig5-snapTAU.42	2.93199	2.23106	3.2491	2.78041	0.551071	1.66324	0.916297	1.71984	0.951876	1.77336	1.14874	1.19481	1.3742	2.78023	2.49556	1.50819	1.16559	1.56887	-1	-0.664492	1.62732	1.01593	1.99903	0.959985	0.280696	-0.0808051	-0.290723	0.357276	1.18755	0.86162	2.21491	0.111887	0.967663	0.137416	0.21196	-0.0304284	-0.206677	-0.425643
Contig5-snapTAU.421	3.0788	2.20326	-1	-1	0.0149695	-0.397825	-0.283586	1.16451	1.26731	0.725464	-1	0.686267	1.62418	-0.14655	1.25031	1.00361	1.12037	0.577364	-0.308541	0.178294	0.324469	0.49799	0.225921	1.38592	0.344448	-0.301611	2.28778	3.53852	4.59406	2.02513	3.99431	0.755192	0.815531	-1	-1	-1	-0.268957	0.214476
Contig5-snapTAU.44	2.43354	4.56883	2.96798	3.2649	2.70153	2.91739	2.95023	2.70464	3.79872	2.6669	2.80756	3.108	3.11169	3.94689	2.23316	3.05774	3.05466	2.45546	1.75109	2.97985	2.90916	3.06235	2.65577	2.33921	2.45838	1.72599	2.76303	1.37402	2.64939	2.08258	2.09296	2.12893	1.0238	0.649742	0.0277664	1.47894	0.805528	1.05035
Contig5-snapTAU.45	3.9843	3.96733	3.80984	4.36333	1.62577	2.32238	3.75915	3.13998	2.95456	2.12864	0.234902	2.62908	2.51438	2.60949	2.48942	2.23701	1.94947	1.4264	2.30927	1.28947	0.651239	0.674496	0.872144	1.50581	1.50346	1.7411	0.132691	1.78972	1.86268	1.04388	0.67824	0.517239	0.811584	0.0588074	0.354785	-1	0.225884	0.666665
Contig5-snapTAU.61	-1	-1	-0.420324	-1	-1	-1	-1	-1	-0.592235	-1	-1	-0.275862	-0.564621	-1	-1	-0.37019	-0.423549	-0.34185	-1	-0.674492	-0.0970463	-1	-0.636204	-0.568451	-1	-0.661323	-0.137968	-1	-1	-0.38092	-1	0.0767121	-0.294421	-0.0978079	-1	-1	-0.767458	-0.812068
Contig50-snapTAU.153	5.61805	5.48607	5.43554	6.33458	4.14591	3.52617	3.29942	4.26539	4.91476	5.03996	5.80789	3.33052	4.19028	3.65828	3.3033	3.95801	3.88042	3.75782	2.82997	3.23536	2.36943	2.43702	1.74054	2.89589	3.46827	2.08616	0.679878	1.88961	1.1543	1.16342	3.70989	2.44857	2.42108	0.839573	-1	2.04392	2.36652	0.745394
Contig50-snapTAU.70	2.45228	3.61884	3.16017	1.20819	1.085	0.0573211	0.31287	-0.332556	0.973635	1.04807	1.44766	2.33073	2.76757	1.47717	0.723984	1.12726	1.08886	0.109811	1.37797	1.86243	0.712593	1.28523	1.41594	1.033	0.0649311	-0.00289157	0.485919	0.949786	0.199527	1.5373	1.41297	0.437351	0.477215	0.106963	-1	-1	-0.65887	-0.24569
Contig51-snapTAU.158	-1	-1	-1	-1	0.532548	-0.550111	-1	-0.0960989	0.981216	0.268918	-1	-0.567147	0.286803	0.167151	1.16356	1.47102	0.276181	-1	-0.0202167	-0.538114	0.521792	-0.129227	0.0679818	-0.469674	-0.245811	-0.406486	0.49897	-1	-0.546833	-0.246968	1.655	-0.0761902	-1	-1	-1	-1	-0.926524	-1
Contig51-snapTAU.17	-1	-1	-1	-1	-1	-1	-1	1.86932	-1	-1	1.71103	-1	-1	-1	-1	-1	-1	-1	-1	-0.285584	-1	-1	-1	-1	-1	-1	-1	-1	-1	-1	-1	-1	-1	-1	-1	-1	-1	-1
Contig52-snap.120	-1	-1	-1	-1	0.285737	-1	0.958507	0.943203	1.63673	1.69995	1.48465	0.81699	-1	-1	-0.698744	0.566296	-1	-1	-1	-1	1.46927	-0.340092	-1	-1	-1	0.707781	-1	0.176321	-1	0.679143	-1	-1	-1	-1	-1	0.882123	-1	-1
Contig52-snapTAU.156	-1	-1	-1	-1	-1	-1	-1	1.50509	-0.569339	-1	-1	0.324014	-0.556257	-1	-0.679323	-1	-1	-1	-1	-1	0.95721	-0.540662	-0.0161298	0.535905	-1	-1	-0.334585	-1	-1	-1	-0.612453	-1	-1	-1	-1	-1	-1	-1
Contig52-snapTAU.179	-1	-1	-1	-1	-1	-1	-1	-1	-1	-1	-1	-1	-1	-1	-1	-1	-1	-1	-1	-1	-1	-1	-0.322057	-1	-1	-1	-1	-0.779574	-1	-0.909416	-1	-1	-1	-1	-1	-1	-1	-1
Contig52-snapTAU.18	0.674452	-0.212743	1.54388	-1	-1	-0.357214	-0.699632	-0.0351472	-0.0452353	-0.348588	-0.272763	-0.211384	0.325372	-0.445852	0.618087	-0.524066	-1	-1	-1	0.420487	-0.322361	-0.882226	-0.269583	-1	-0.605531	-1	-1	-1	-1	-0.07389	-0.811542	-1	-1	-0.742496	-1	-1	-1	-1
Contig52-snapTAU.28	1.1141	3.37855	2.27115	-1	-0.409624	0.534714	0.970722	0.097677	-0.241475	-1	1.74727	-0.32466	2.51469	-0.0698855	1.68867	0.606181	0.964881	-0.103943	-1	-0.316344	0.766797	0.43977	-0.433575	0.638693	-0.265448	-1	-1	-0.800577	-0.497661	-0.269914	-0.602826	-0.168904	0.0290122	-0.520085	-1	-1	-0.541486	0.0351161
Contig52-snapTAU.37	-1	-1	-1	-1	-1	-1	-1	0.383511	4.18804	2.32751	-1	1.24517	-1	-1	-1	-1	-1	3.18827	-1	-1	-1	-0.781335	-1	-1	-1	-1	1.54213	1.28456	-1	-1	-0.0083813	1.29743	-1	0.571017	-1	-1	-1	0.288303
Contig53-snapTAU.107	-1	-1	-1	-1	-1	0.600791	-0.496284	0.698348	0.396041	-0.156702	-1	-0.046312	-0.772134	-1	-1	0.489513	0.412642	0.547929	-1	-1	0.183557	-0.838498	-0.557758	-1	-0.575604	-1	-1	-0.719524	0.476433	-0.471754	0.0612797	-1	0.446263	-1	-1	-1	-0.535185	-0.579911
Contig54-snapTAU.130	-1	0.236405	-1	-1	-1	-1	-0.906738	0.128533	0.962612	1.12853	-1	-1	-1	-1	-1	-1	-1	-1	0.665853	-0.321803	-1	-0.79524	-1	-1	-1	-1	-1	0.0818607	-0.732782	-1	-1	-1	-1	-1	-1	-1	-1	-1
Contig54-snapTAU.133	-0.39852	-0.686303	1.02485	-0.498881	-0.973014	-0.610603	0.891565	3.09791	0.879099	3.10829	0.798781	-1	-0.0293467	-0.395027	-0.0589352	0.00965894	3.29623	3.3448	-0.281764	0.0231756	0.586132	-0.467883	-0.119188	0.117386	0.570924	2.44299	-0.180408	0.52625	-0.612981	-0.0695338	-0.472176	-0.408834	-0.297645	-0.651347	-0.64075	-1	-0.816063	-0.434676
Contig54-snapTAU.45	2.28812	-1	-1	2.2295	-1	-0.572379	0.0260344	-1	0.106296	-1	1.39854	0.9358	-0.37042	0.0563589	-1	0.880525	-1	-0.245528	0.102947	1.04376	-1	-0.790259	-0.170642	0.118821	0.21275	-1	-0.421905	0.532261	1.77059	-0.165273	0.793195	0.389794	0.390907	-0.356326	-0.502391	0.888104	-0.0620816	0.29124
Contig54-snapTAU.73	-1	-1	-1	-1	-1	-1	-1	-1	-1	-1	-1	-0.28384	-1	-1	-1	-1	-1	-0.669257	-1	-1	-1	-0.489494	-1	-0.000460843	-0.63836	-0.0169829	-0.776627	-0.744408	0.571381	-1	-0.486004	-1	-1	-1	-1	-1	-1	-1
Contig54-snapTAU.84	-1	1.98435	1.04442	-1	0.353696	-1	-0.130073	-0.688967	-0.377671	-1	-1	-1	-1	0.0369402	1.20034	-0.444932	-1	0.352997	-0.319296	-0.344166	-1	-0.730052	-0.0687774	-0.756658	-1	-0.320735	-1	-0.478189	0.10323	-1	-1	-1	-1	-0.425919	-1	-1	-0.824894	-0.51296
Contig55-snapTAU.61	1.4083	2.31853	3.17115	0.692765	1.19768	1.66562	0.791011	0.77869	1.1555	1.27067	0.121874	1.0398	1.19896	1.16505	3.17224	1.96446	1.75055	0.987309	-0.00540259	0.999149	1.89259	1.10614	0.611864	1.12836	0.625751	0.795613	0.732845	1.41174	0.79363	1.08721	0.869357	1.02477	1.44277	1.5747	0.474909	0.191252	1.85436	1.75838
Contig56-snapTAU.105	-1	-1	-1	-1	-0.903687	-1	-1	-0.666578	-1	-1	-1	-1	-1	-1	-1	-1	-1	-1	-1	-1	-1	-1	-0.334061	-1	-1	-1	1.82101	2.24578	0.0910462	2.60949	2.64677	4.24411	4.56483	4.40375	3.06156	4.43841	3.44215	1.79438
Contig56-snapTAU.123	-1	-1	-0.231447	-1	-1	-1	0.60327	-1	-1	-1	-1	-1	0.654145	-0.724782	0.161452	-0.491842	-1	-1	-1	-0.643008	-0.669394	-0.294368	-0.704437	-1	-1	-1	-1	-1	-1	-1	-1	-1	-1	-1	-1	-1	-0.841747	-0.555276
Contig56-snapTAU.166	1.04006	3.93934	3.38425	2.81259	0.238354	0.931129	0.56984	1.75642	1.14912	1.75964	0.832551	-0.0606216	1.23024	2.19898	3.73096	3.12526	1.64653	1.22098	0.938456	1.42402	1.98519	0.970712	2.2253	2.22379	1.46787	0.993466	1.39725	3.27997	2.79198	4.18808	3.44496	4.73057	4.19919	3.92506	2.04018	3.66474	2.30195	1.66972
Contig57-snap.100	1.18192	2.09562	2.89047	1.10911	1.6364	0.967764	1.53557	1.78245	1.43921	1.52627	1.3155	1.74709	1.51458	1.87383	2.66476	1.86466	3.52374	1.49483	1.63143	1.53926	1.93823	1.36482	1.60173	1.839	1.97224	1.74876	0.935808	1.96397	1.0842	1.45446	1.59753	2.08202	2.01632	1.89205	1.97716	2.38108	2.19661	2.10813
Contig58-snapTAU.108	-1	-1	-1	1.19003	-1	-1	-1	-1	-0.715322	-1	-1	-1	-1	-1	-1	-1	-1	-1	-1	-1	-1	-1	-1	-1	-1	-1	-1	-1	-1	-1	-1	-1	-1	-1	-1	-1	-1	-1
Contig58-snapTAU.109	0.180371	-1	-1	-1	-1	-1	-1	-1	-0.528208	-1	-1	-1	-1	-1	0.32764	-1	-1	-1	-1	-1	-1	-1	0.440636	-1	-1	-1	-1	-1	-1	-1	-0.698754	-0.726964	-1	-1	-1	-1	-0.485563	-1
Contig58-snapTAU.64	-1	-1	-1	-1	-1	-0.935211	-1	-1	-1	-1	-1	-1	-1	-1	-1	-1	-1	-0.628521	-0.764199	-1	-1	-1	-1	-1	-1	-0.638374	-0.827694	-1	-0.385446	-0.128748	-0.804175	-1	-0.847289	-0.812185	-1	-1	-1	-1
Contig58-snapTAU.91	9.67856	9.92719	10.9388	10.5347	10.696	9.94803	10.3677	10.615	10.7278	11.2884	11.2351	10.3471	10.9296	10.7754	10.6251	10.2443	11.1203	11.0771	10.7428	11.3575	11.0627	10.2365	10.2909	10.7065	11.3378	11.4491	10.7301	10.9473	10.1863	10.5086	10.576	10.3361	10.8136	10.8014	11.0028	11.581	10.8397	11.2758
Contig59-snap.145	2.30311	2.43465	2.40634	3.93987	2.04252	2.07613	2.57848	2.53728	2.81351	2.16687	2.82172	2.55891	2.98166	2.87942	4.18092	3.48561	2.32571	2.4946	2.15786	2.2333	3.00462	2.69321	1.90323	2.41455	2.31743	2.25739	1.87322	2.4912	2.3975	1.5118	2.16315	2.13913	2.29189	2.16255	1.84811	2.45833	2.63896	2.49916
Contig6-snapTAU.170	-1	-1	-1	1.74613	-1	-1	-1	-1	-1	-1	-1	0.373302	-1	1.12592	-1	-1	-1	-1	-1	-1	-0.528709	-0.799197	-1	-1	-1	-1	-1	-1	-1	-1	-1	-1	-1	-1	-1	-1	-1	-1
Contig6-snapTAU.312	2.99316	4.24055	4.10112	4.14506	6.39738	2.14224	3.02929	2.13267	2.84433	3.04711	3.46423	2.03524	3.54592	3.20338	3.0912	3.76276	3.69203	3.26893	2.99125	3.57369	3.66674	2.57245	3.20229	3.52419	3.44681	3.56094	3.30424	2.34809	2.0449	2.98011	3.2313	2.90904	3.44724	3.64307	3.9951	3.29523	3.57489	3.91791
Contig6-snapTAU.39	-0.231485	1.99784	-1	-1	-0.966726	-0.582135	-0.917264	-0.273673	-0.683252	-1	0.450996	-0.0623506	-0.409824	1.09749	-1	0.536174	0.485877	-0.780525	-0.51692	-0.19022	-0.0166009	-0.817389	-1	-0.758861	-1	-1	-1	-1	-0.772726	-1	-0.505741	-1	-1	-1	-1	-1	-1	-1
Contig6-snapTAU.401	-1	-1	-1	-1	-1	-1	-1	-1	-1	-1	-1	-1	-1	-1	1.20266	-1	-1	-1	-1	-0.261442	-1	-1	-1	-1	-1	-1	-1	-1	-1	0.682195	-1	-1	-1	0.0716659	0.576791	-1	-0.694723	-0.514756
Contig6-snapTAU.412	1.58136	2.20459	2.1832	2.6121	3.17943	1.19013	1.75493	2.1367	1.58634	1.38275	1.86924	1.37431	1.36707	1.70811	2.41531	2.07023	1.16081	2.01212	1.86458	1.53554	1.82083	1.72552	1.31122	2.12426	1.67638	1.63235	1.21685	1.56365	1.25475	1.63763	1.73355	1.68657	2.22874	2.67445	2.13433	3.40679	2.441	2.6889
Contig60-snapTAU.64	1.09482	1.95046	-1	1.18431	1.3072	-0.502482	0.148759	0.693069	1.77976	0.580005	-1	-0.182787	-1	0.37304	-0.447054	2.13159	-0.266633	-1	-0.109297	1.28599	-0.50237	-0.76685	-0.441043	-0.192548	-0.264661	-0.513844	-1	-0.114033	-0.81166	-1	-1	-1	-0.243926	-0.132414	-1	-1	-0.65204	-0.261926
Contig60-snapTAU.81	-1	-1	-1	-1	-1	-1	-1	-1	-1	-1	-1	-1	-1	-0.12796	-1	-1	-1	0.350394	-1	-1	-1	-1	-1	-1	-1	-1	1.97366	1.70473	-0.364201	2.88811	1.54417	3.22036	2.84312	3.42638	2.68067	1.70851	1.72849	-0.667853
Contig60-snapTAU.82	-1	-1	-1	-0.461305	-1	-0.703428	-0.744322	-0.513081	-0.550321	-0.327575	0.102822	-0.331015	0.0472336	0.0635679	-0.915858	0.0162747	-0.721554	-0.218694	-0.662531	-0.674908	-0.266578	-0.489883	-0.762892	-0.235029	-0.166947	-0.598458	-0.645463	-0.338184	-0.476112	-0.303374	-0.401327	-0.210411	-0.0621496	-0.185292	-0.61226	0.43645	-0.151216	-0.130293
Contig60-snapTAU.93	3.86495	3.03967	-1	6.02832	-0.622413	2.85265	4.86034	3.39151	1.18046	4.05251	-1	2.40633	3.13244	2.76091	4.02569	3.80182	-1	3.91467	0.364449	2.49541	2.68745	1.47713	1.48053	2.04527	3.25521	2.17119	5.16501	2.59285	-0.100423	2.88631	0.517465	-1	3.24357	2.06383	1.1951	-1	2.45541	2.15867
Contig600-snap.2	-1	-1	-1	-1	-1	-1	-1	0.836611	1.5183	0.641834	-1	0.500704	-1	0.056444	2.07138	2.87387	-1	0.373029	-1	2.1177	-1	0.187638	0.318144	2.25698	1.38386	-1	-0.0827567	2.18045	0.60186	-0.736487	1.13198	2.22517	0.852197	2.08687	2.63176	2.47354	2.08568	0.829025
Contig61-snap.66	8.00955	8.32877	9.23557	8.22871	8.47237	7.97368	8.49266	8.70271	9.01042	8.45904	8.7982	8.51591	8.64848	9.03972	8.67733	8.83559	8.59878	9.12561	8.42598	9.28324	8.66248	8.26565	8.11724	8.34737	8.95545	8.49644	8.16018	8.64789	8.15414	7.98987	8.20799	7.86091	8.47259	7.91561	8.22097	7.63716	8.39429	8.31309
Contig61-snapTAU.23	1.42152	1.15558	0.312399	3.54442	0.78352	1.81739	1.33237	0.627222	2.39776	0.0713714	2.45253	0.543707	2.03232	2.33068	1.26273	1.27035	2.65135	0.961081	1.17761	1.32561	1.42923	0.0431468	0.851688	1.73901	1.91927	0.757663	0.861276	0.460509	0.766076	0.714299	-0.0236881	0.428856	0.590355	0.319913	0.736128	0.264364	1.20853	0.992
Contig61-snapTAU.74	-1	-1	-1	-1	-0.678874	0.673349	0.94072	-1	0.984378	1.26866	-1	-1	-1	-1	2.6944	1.31773	1.23174	2.55566	-1	1.39159	-1	1.10732	3.63216	-1	0.878269	1.34255	0.304164	0.397726	-1	-1	-1	-1	-1	-1	-1	3.3172	-0.589141	-1
Contig61-snapTAU.76	-1	-1	-1	-1	-1	-1	-1	-1	-0.589829	-1	-1	-1	-1	-1	-1	-1	-1	-0.401573	-0.912991	-0.867276	-1	-1	-1	-1	-1	-0.804416	-1	-0.444799	-1	-1	-1	-0.267272	-0.695939	-1	-1	-1	-0.962643	-1
Contig63-snapTAU.115	1.0025	1.16076	2.7098	2.61863	0.68305	1.01038	1.15556	1.17961	1.34219	2.47209	1.1187	0.775359	0.977806	-0.00749152	1.33146	0.0824358	0.531924	1.64054	0.989919	0.383145	0.849351	-0.181554	-0.341704	-0.203034	-0.71624	-0.109093	0.510683	0.209684	0.119541	0.0916621	-0.506194	0.440915	0.566644	0.544249	-1	-1	-0.151195	-0.703099
Contig63-snapTAU.92	1.77953	-1	-1	2.19838	1.04109	2.13836	1.84888	1.73836	1.14539	2.12201	3.13756	1.79829	1.4437	1.63861	1.32351	2.75618	2.45172	2.35282	0.366331	2.21739	2.61271	2.75511	2.75086	2.29529	1.08403	1.84243	-0.560104	-1	1.01358	1.57528	0.2478	-0.168635	0.766774	0.269299	1.92348	-1	-0.348777	0.354741
Contig63-snapTAU.93	-1	3.6214	-1	-1	-1	-1	-1	-1	-1	-1	-1	-1	-1	-1	-1	-1	-1	-1	-1	1.20365	-1	-1	1.19176	-0.332042	-1	-1	1.34664	1.28834	2.18304	2.23321	3.35468	1.90771	3.21223	4.07888	1.57512	2.81275	4.5175	4.77953
Contig64-snapTAU.100	-0.141962	-1	3.07017	-1	-1	-0.744683	-0.816093	-0.710002	-0.795703	-0.690736	-1	-0.784518	-0.843985	-1	-0.944329	-0.0267485	-0.711659	-0.348246	-0.842842	0.225225	-0.0640412	-0.790907	-0.746608	-0.89406	-0.844283	-1	-1	-1	-0.695478	-0.917533	-0.829852	-0.0539713	-1	-0.337606	-0.512414	-1	-0.948411	-0.845078
Contig64-snapTAU.83	0.710247	1.22275	-0.520223	-1	0.741245	0.0472711	0.181435	0.227755	0.0179767	-0.233522	0.468619	0.0200323	-0.0271469	0.666416	-0.585254	-0.0727297	-0.016438	0.00341956	-0.124995	0.662293	-0.684156	0.0413931	-0.418315	0.0233617	0.117803	-0.545618	-0.313763	-0.657886	-0.820454	-1	-0.595173	0.406703	-0.142671	-1	0.0491664	-1	-0.297887	-0.378244
Contig64-snapTAU.99	3.68884	5.54356	2.72108	3.93739	4.43287	3.29745	1.7393	4.33167	3.11766	2.64397	2.97546	2.23984	2.93682	1.75191	6.51841	4.08632	2.49446	2.91494	3.07655	1.80136	3.7756	0.678826	1.66441	1.74285	2.1295	2.24475	0.100827	0.622484	2.38751	0.988363	2.06358	-1	3.11105	-1	-1	-1	1.31587	-1
Contig65-snapTAU.1	5.39039	5.65455	5.94658	7.45759	4.91329	4.0118	4.10495	5.16735	5.18553	6.71985	3.44506	4.69094	4.24837	5.62703	4.13691	5.13564	5.14016	4.45844	4.94103	4.37546	4.53375	4.33709	4.56475	4.54349	4.81544	4.40118	4.00927	5.02796	4.40859	4.89397	4.3726	4.50952	5.29034	4.12478	4.64644	4.82983	5.04604	5.27014
Contig65-snapTAU.14	1.98294	-1	-1	-1	-0.930926	-0.201821	0.452379	-0.501005	0.745611	0.223495	-1	0.508324	1.7991	0.626131	0.146817	1.58742	1.82461	0.950168	0.650931	0.714723	2.09318	1.42124	0.944887	1.94307	1.09067	1.96276	1.41922	3.22441	2.16203	2.07471	2.45581	2.6307	2.84576	2.79834	1.93771	2.23884	3.16516	3.27801
Contig67-snapTAU.14	-1	-1	-1	-1	-1	-1	-1	-1	1.54841	-1	-1	-1	0.135321	-1	-1	-1	-1	-1	-1	-1	-1	-1	-1	1.98445	-1	-1	-1	-1	-1	-1	-1	-1	-1	-1	-1	-1	-1	-1
Contig67-snapTAU.15	-1	-1	-1	-1	-1	-1	-1	-1	-1	-1	-1	-0.178091	-0.0203105	-1	-1	-1	-1	-1	-1	-1	-1	-1	0.357187	-1	-1	-1	-1	-1	-0.07949	-1	-1	-1	-1	-1	-1	-1	-1	-1
Contig67-snapTAU.167	1.27241	-1	-1	-1	1.48218	2.74715	1.16207	0.728798	1.44497	1.96949	0.738406	1.12036	2.92512	2.05434	2.53501	1.95247	4.09166	2.14689	3.18284	0.0205294	2.41771	1.24849	1.58522	3.10972	2.31963	1.52335	-0.427938	1.20038	0.346756	0.774964	0.307132	0.753792	0.952002	-1	0.0329895	-1	0.44476	0.823388
Contig67-snapTAU.70	0.704984	1.04554	-1	-1	0.242345	-1	-1	0.717247	-1	-1	0.0150956	-0.39473	-1	-1	-1	-1	-1	-1	-0.385334	-0.536215	-1	-1	-0.515032	-1	-1	-1	-1	-1	-1	-0.357358	-1	-1	-1	-1	-0.604867	-1	-0.796838	-1
Contig67-snapTAU.71	2.08612	1.30267	3.51214	2.38017	1.26642	0.796474	1.25069	2.03735	1.55934	2.08635	2.32081	1.45909	0.637316	1.6374	2.4723	1.29242	1.78172	2.66772	0.120675	1.89385	1.15189	0.544511	1.27354	1.67225	1.96771	1.558	1.4947	1.15022	0.594461	0.641603	0.808757	0.563362	-0.0668642	1.1216	0.119088	-1	-0.137562	0.989417
Contig67-snapTAU.72	1.57553	1.37663	4.5006	1.14166	0.83689	0.369759	-0.0472888	1.08346	1.60882	0.335932	1.71593	1.56354	1.53114	0.212228	1.84112	1.29577	1.0666	0.188193	0.650211	0.362609	1.10752	0.407803	0.0107458	-0.0802293	0.843573	0.28054	-0.167498	0.260723	-0.104524	0.105159	0.110933	0.0241735	0.359867	0.630314	-0.336113	0.192009	-0.0338139	-0.272354
Contig69-snapTAU.118	0.795941	-1	-1	-1	-1	-0.176461	-0.582335	0.334188	-0.518309	-1	-0.218349	-1	-0.64614	-1	-1	-1	-1	-1	0.00717292	-0.621262	-0.142961	-0.348223	-0.212	-0.63655	-0.790756	-0.481427	0.401187	-0.484195	-0.16543	-0.374739	-0.439234	-0.505179	-0.08125	0.356708	-0.804852	0.674895	0.054829	0.00473574
Contig7-snapTAU.149	-1	-1	-1	-1	-1	-1	-1	-0.35449	-1	-1	-1	-1	-1	-1	-1	-1	-1	-1	-1	-1	0.311946	-1	-1	-1	-1	-1	4.16559	3.37888	4.07048	5.12346	4.38514	6.04918	6.392	6.31698	5.39164	6.43839	4.28944	2.28721
Contig7-snapTAU.453	-1	-1	4.22167	-1	-1	-1	1.12534	-1	1.57654	-1	-1	-0.087066	1.44831	2.05009	-1	-1	1.16792	0.938455	-1	2.42301	2.22267	1.40326	1.48129	0.63288	2.41214	1.48818	1.45069	3.23356	3.18829	3.06043	3.83406	4.34321	5.38216	4.92293	3.8922	3.46224	3.63065	3.0196
Contig7-snapTAU.59	0.710903	-1	-1	-1	-1	-1	-1	-1	-1	-1	-1	-0.116691	-1	1.29118	-0.141192	-1	-1	-1	-1	-1	-1	-0.611296	-0.0495363	-1	-1	-1	-1	-1	-0.831615	-0.816177	-0.0515998	-1	0.140081	-1	-1	-1	-1	-1
Contig7-snapTAU.60	-1	-1	-1	-1	-0.389844	1.00412	-1	0.126626	-1	-1	-1	-0.735687	-1	-0.471425	0.248884	-1	-0.683173	0.108434	-0.827422	-0.696059	-0.467954	-1	-0.501021	-0.313175	-0.679431	-0.401786	0.969179	0.178227	0.436244	-0.792217	-0.414126	-0.654295	-0.432097	-1	-0.707972	-0.42002	-0.539241	-0.812068
Contig7-snapTAU.68	2.14589	1.37985	-1	2.24827	1.15548	0.500185	1.36839	1.28981	1.46728	1.07765	-0.285763	1.9849	1.3693	2.10812	3.96989	2.31013	3.29261	2.28281	0.819809	1.83378	3.35355	1.60266	3.65816	2.03798	2.06568	1.3833	1.50912	0.790583	3.00266	0.686743	3.42241	1.61484	1.67723	1.05472	0.789518	0.309151	0.681255	0.346468
Contig7-snapTAU.69	-1	-1	-1	-1	1.91726	-1	-1	-1	-1	-1	-1	-1	-1	-1	-1	-1	-1	-1	-1	-1	2.66026	-1	0.24799	-1	-1	-1	-1	-1	1.03793	2.35342	0.419208	2.92974	1.2773	0.677797	0.33411	-1	-0.765446	-1
Contig70-snapTAU.31	-0.53864	0.837994	-1	-1	-1	-0.398772	-1	-1	-0.749131	-1	-0.6047	-0.809775	-1	-0.40539	-0.761084	-0.394258	-0.758629	-0.686355	-0.511277	-0.496689	-0.834113	-0.849791	-0.875124	-1	-0.680358	-0.635242	-0.935327	-0.711165	-0.875137	-0.606036	-0.671456	-0.507621	-0.735992	-0.405739	-0.662179	-1	-0.736323	-0.738715
Contig71-snapTAU.14	8.72714	8.65557	7.78704	9.69716	9.944	8.23095	8.90431	9.77727	9.97249	8.99237	8.0438	9.03354	8.20736	8.07307	8.04016	7.78832	8.477	7.83342	7.63538	7.25564	8.65366	6.82409	6.8968	6.72621	5.8371	5.27662	6.04147	6.26831	5.67406	4.9749	6.01059	3.74736	6.34431	7.88834	6.31716	5.57967	4.53832	4.79505
Contig71-snapTAU.8	6.53529	6.3329	5.3826	1.75353	0.827377	3.65542	1.17402	2.39847	0.592642	1.79151	3.01421	3.69146	4.23971	3.79036	5.54384	5.49416	5.04405	4.97037	2.20283	3.52137	5.38154	4.41665	5.96866	3.55682	5.52505	3.26356	0.994432	-0.475617	-0.901041	-0.167633	-0.579979	-0.451408	0.0728667	-0.108859	2.11981	-1	-0.607891	-0.65212
Contig74-snapTAU.96	6.61835	7.27273	4.11714	5.10289	4.49381	6.07223	6.28008	5.47626	6.04709	3.54753	3.62188	3.83938	3.16767	6.7811	4.95688	2.75129	3.6418	0.793188	-1	-1	1.48091	-0.145012	-1	1.33544	-0.170539	-1	0.27284	-1	-0.769561	-1	-1	-0.389178	2.6123	-0.461255	1.72765	-0.245315	0.757855	0.170363
Contig75-snapTAU.103	2.74473	4.25785	4.54912	-1	5.95189	1.83049	1.44611	1.5947	2.31648	3.13454	3.30872	1.61034	2.01127	1.76749	0.614194	1.4566	1.86444	2.01711	1.36506	1.22191	1.65589	2.26918	1.96522	2.75429	2.70712	2.14033	2.46777	2.0376	3.05009	3.15086	2.52934	3.30617	3.48487	2.87558	2.87313	2.75141	2.38326	2.78997
Contig75-snapTAU.139	-0.0493225	-1	-1	-1	-1	-1	-1	-1	-0.213496	-1	-0.358143	-1	-1	-1	-1	-1	-1	-1	-1	0.522543	-1	-0.624265	-1	-1	-0.637516	-1	-0.790233	-1	-1	-1	-1	-1	-1	-1	-1	-1	-0.955882	-1
Contig75-snapTAU.159	5.42882	6.73101	6.7868	6.18512	5.88023	5.15346	5.57374	5.24942	6.00077	4.76553	5.62877	5.32914	5.28364	6.28541	6.73688	6.26642	6.80473	5.20093	5.66692	5.7538	5.84733	5.2681	5.44264	5.63783	5.63387	5.24209	5.30077	5.82355	5.55813	5.40821	5.63585	5.2615	6.10526	5.37476	5.65087	4.71615	5.92766	5.8451
Contig75-snapTAU.45	-1	-0.53732	1.55352	-1	1.27277	-0.233281	-1	-0.0801981	-0.0512857	1.06552	1.91895	-0.65175	-0.197763	-0.341902	-1	-1	-0.551414	1.0259	-1	-0.482317	0.218914	-0.0673605	-0.769301	-0.0975538	0.312245	-1	-0.818316	-0.419213	-0.752884	-1	-0.245145	-1	-0.25813	-0.0769047	-1	-1	-0.630002	-0.588622
Contig7759-snapTAU.1	-1	-1	-1	-1	-1	-1	-1	-1	-1	-0.272231	-1	-1	-1	-1	-0.31206	0.662293	0.189062	-1	-1	-1	-0.201655	-1	-1	-1	-1	-1	-0.86045	-0.257481	-1	1.34624	-1	-1	-1	-1	-1	-1	-0.627495	-1
Contig79-snapTAU.25	-1	-1	-1	-1	-1	-1	-0.432426	-1	-1	-0.494669	-1	-1	-1	-1	-1	-1	-1	0.381555	-1	-1	-1	-1	-1	-1	-1	-1	-1	-1	-1	-1	-1	-1	-1	-1	-1	-1	-1	-1
Contig8-snapTAU.191	2.55493	2.73363	3.22719	2.28303	1.988	2.0359	3.34418	3.21118	4.04689	4.25415	3.22584	3.18936	3.53219	1.6917	1.47493	2.54626	3.79048	2.82992	2.69019	2.22132	1.6941	1.59523	0.0175214	0.728629	0.487646	1.15643	0.675926	1.91275	1.91157	0.860146	0.48424	-0.298603	0.0547334	0.797332	0.727297	0.309335	0.189748	0.587849
Contig8-snapTAU.222	1.19327	2.25201	4.0799	2.46716	-1	-1	-0.628585	1.09056	1.71205	0.724032	1.9485	2.13037	1.35665	2.43803	1.79342	0.99814	1.72904	-0.172625	-0.441728	0.540327	-0.1667	-1	-1	1.76508	-0.0493725	-1	0.0120057	-1	-1	-1	0.227535	-1	-1	-1	-1	-1	-0.857158	-0.197897
Contig8-snapTAU.297	-1	-1	-1	-1	-1	-1	-1	-1	-1	-1	-1	-1	-1	-1	-1	3.85492	-1	-1	-1	0.950317	-1	0.367466	-1	-1	-1	-1	-1	-1	-1	-1	-1	-1	-1	-1	-1	-1	-1	-1
Contig8-snapTAU.319	-1	-1	-1	-1	-1	-1	-1	-1	-0.353876	-1	-1	-1	-1	-1	-1	-1	-1	-1	-1	-1	-1	-0.613911	-1	-1	-1	-0.361174	-1	-1	-0.506535	-0.570052	-0.118334	-0.363633	0.00753182	0.0714693	-0.510863	-1	-0.198329	-0.680709
Contig8-snapTAU.357	-1	-1	-1	-1	-1	-1	-1	-1	-1	-1	-1	-1	-0.675454	-1	-1	-1	-1	-0.493467	-1	-1	-1	-1	-1	-1	-1	-1	-0.918781	0.0582645	-0.498233	-0.843906	-0.646959	-0.374511	-1	-0.0963025	-1	-1	-0.851782	-1
Contig8-snapTAU.423	4.92272	3.96039	0.655715	4.63935	4.6938	3.62921	3.36942	4.65242	4.33428	4.13915	3.40672	3.73101	3.77842	4.73045	3.91632	3.0978	4.35539	2.87312	4.44556	3.69032	3.54102	3.00473	4.56063	4.77793	2.28129	1.81564	2.23501	1.10501	4.61316	2.83757	4.09769	1.16583	1.6516	-0.104367	0.703765	2.03691	1.45187	0.769446
Contig8-snapTAU.424	5.32846	5.01362	4.37154	4.17538	4.40947	3.092	3.64797	4.22271	3.78059	4.45074	3.74025	3.82927	3.89961	4.88872	4.76403	3.93105	3.96303	3.31868	2.4424	4.35474	3.84822	3.01001	3.52245	3.84326	2.29578	1.52379	1.99458	0.809516	3.27125	1.56704	2.52103	1.12834	2.236	-0.234223	-0.320274	0.577215	0.639842	0.734088
Contig8-snapTAU.425	-1	4.3319	-1	-1	2.48553	1.98079	-1	1.51293	4.04347	2.11886	-1	-1	1.22387	2.78818	3.87168	-1	-1	1.03102	0.557723	0.67578	-1	2.00857	-1	1.64831	-1	-1	-1	-1	1.29302	-1	-1	-1	-1	-1	-1	-1	-1	-1
Contig8-snapTAU.426	3.60058	3.15937	1.64786	4.02293	3.38543	2.06991	2.72081	3.27144	3.69221	3.2357	1.83566	2.9194	2.80829	3.69379	3.82828	3.26875	3.54874	2.93222	2.73058	3.82135	3.46723	2.17443	2.96668	3.20177	1.8627	1.16703	2.32454	1.72214	2.99042	2.04544	2.29045	1.17865	0.910697	-0.0369715	0.801644	-1	0.563167	0.701491
Contig80-snapTAU.30	0.342569	-1	-1	0.798905	-0.45046	0.275177	-0.719997	-0.486746	-1	1.3043	-0.701143	0.293405	0.431333	1.01778	-1	-1	-1	0.73216	-0.120402	-0.825923	-1	-0.684542	0.317927	-0.589398	-0.23032	-1	-0.923357	-0.623512	-0.101432	-0.298471	-0.488479	0.3731	-0.245241	-0.238129	0.538282	-0.048435	-0.161755	-0.205262
Contig80-snapTAU.6	-1	-1	-1	-1	-0.88815	-1	-0.672406	-0.00103941	-0.113875	-1	-1	-1	0.647019	0.034997	1.10554	-0.513984	-1	-1	-0.770969	0.151364	-0.608529	-0.730229	-0.566439	-0.525525	-0.046352	-0.486794	-1	-1	-0.383426	-0.940711	-0.752452	-0.721383	-1	-1	-1	-1	-0.973987	-1
Contig80-snapTAU.67	-1	-1	-1	-1	-1	-0.0382182	-1	-0.132887	-1	-1	-1	-1	-1	0.394781	-1	0.781814	2.4813	1.40502	0.38079	-0.740363	0.927141	-1	0.130594	0.514035	0.309896	-0.524246	-0.834463	-1	-1	-1	-1	-0.703904	-1	-1	-1	-1	-0.456452	-0.489243
Contig80-snapTAU.70	0.389374	-1	-1	-1	0.579075	-0.530903	-1	-0.227789	0.787785	0.138743	0.517609	0.230603	2.35288	0.139754	-1	0.371408	1.16392	0.0960715	0.204998	-0.135908	1.66021	-0.768142	-1	0.873282	0.321007	0.159365	-1	-0.294114	-0.79857	-1	-0.420375	0.00990809	-0.0156867	-0.296944	-1	1.11548	-0.590168	-0.118531
Contig81-snapTAU.111	-1	-1	3.93936	2.074	0.13804	1.37677	2.28196	2.6906	2.67159	2.90444	2.93359	0.97558	0.420628	2.40886	1.48035	1.89217	-1	2.83299	1.85486	-0.314109	0.00152775	-0.419724	-0.408834	0.618885	0.0746397	0.351649	0.457907	-0.566225	-1	-1	-1	-1	0.392833	1.74255	-1	0.0811436	-0.107734	0.694471
Contig81-snapTAU.112	-1	1.16071	-1	-1	-1	-1	-1	-1	-1	-0.351487	0.646088	-0.0822878	1.85867	-1	-1	-1	-1	-1	-1	-1	0.531833	-0.819107	-1	-1	-1	-1	-1	-1	-1	-0.405157	0.438362	-1	-1	-1	-0.234156	-1	-1	-0.171878
Contig83-snapTAU.117	-1	-1	-1	-1	-1	-1	-1	-1	5.30561	-1	-1	-1	-1	-1	-1	-1	-1	-1	1.84612	0.872377	-1	-1	-1	-1	-1	-1	-1	0.987494	0.894466	-1	-1	-1	-1	-1	-1	-1	-1	-1
Contig83-snapTAU.67	2.59973	2.28379	4.46766	1.92504	2.23944	0.119982	0.983955	-1	0.84917	1.00319	3.42582	0.895777	1.16978	0.456757	-1	2.17271	0.131312	0.711177	-1	-1	-1	0.507846	1.44235	2.15688	0.64461	-0.0191338	-0.0795928	0.391387	0.333495	-1	0.724244	-1	-1	0.046864	-1	0.405772	-1	-0.276655
Contig84-snapTAU.60	-1	-1	1.73215	-1	-1	-0.638278	-0.364866	-1	-0.705967	-0.164318	-0.781678	0.643601	0.439077	-0.00201258	-1	-0.656827	0.0790749	-1	-1	-0.288671	-1	-0.0748751	-0.634046	-0.891628	-0.261639	-1	-1	-1	-1	-0.634338	-0.725573	-1	-0.596776	-1	-1	-1	-0.948886	-1
Contig84-snapTAU.78	1.6268	1.94501	-1	-1	-0.955114	-1	-0.353031	-1	-1	1.57007	-1	-0.84661	-0.126158	-0.348516	-1	-1	-1	0.00708352	-1	-1	-0.562784	-0.730268	-1	-1	-1	-1	-0.851692	-1	-1	-1	-1	-1	-1	-1	-1	-1	-0.747104	-1
Contig85-snapTAU.53	-1	-1	-1	3.1993	-1	-1	-1	-1	-1	-1	-1	-1	2.43962	-1	2.42225	-1	3.41812	-1	-1	-1	-1	-1	-1	-1	-1	-1	-1	-1	1.71738	-1	-1	-1	-1	-1	-1	-1	-1	-1
Contig85-snapTAU.54	1.39388	-1	-1	-1	-0.919299	1.97541	1.14585	2.86486	1.60492	2.53288	2.38531	1.59105	1.99198	1.20563	2.53887	2.80018	2.60772	1.07169	1.14417	1.04797	0.712257	1.65461	0.937735	2.0421	-1	0.167208	-0.609725	-1	1.26805	-1	1.80669	-1	-1	-1	-1	-1	-0.175522	0.619068
Contig85-snapTAU.80	0.00773582	-1	1.92827	1.64965	0.459826	0.111512	1.72643	0.134195	0.947228	-0.239902	0.827368	1.22468	1.44722	2.2275	1.38129	0.696306	2.25689	0.45186	-1	0.891221	0.0530716	0.43508	0.406062	1.02318	-0.119807	-0.281894	0.356754	0.612851	0.526251	0.15589	0.246153	0.0775486	1.19491	0.951677	0.34841	-1	0.578738	0.607981
Contig86-snapTAU.15	-1	-1	-1	-1	-1	-1	-1	-1	-1	-1	-1	-1	-1	-1	-1	-1	-1	-1	-1	-1	-1	-0.122316	-1	-0.450446	-1	-1	-1	-1	-1	0.07927	0.0851584	0.662493	0.395229	0.786889	2.88953	1.58089	0.965103	0.572165
Contig86-snapTAU.4	3.35581	-1	-1	-1	-1	-0.490994	0.00719718	-1	-1	-1	-1	-0.452613	-1	-1	-1	-0.626487	-1	0.174023	-1	-1	-1	-1	-1	-1	-1	-0.606053	-1	0.339702	-1	-1	-1	-0.654967	-0.473277	-1	-1	-1	-1	-0.410911
Contig87-snapTAU.100	-1	3.74405	-1	-1	-1	-1	-1	-1	-1	-1	0.916584	-1	-1	-1	-1	2.9022	1.213	-1	-1	-1	-1	-0.273224	-1	2.64899	3.65611	3.96374	3.16761	2.61862	1.81983	2.78053	2.0919	-0.33944	-1	-1	-1	-1	-1	-0.385632
Contig87-snapTAU.2	-1	-1	-1	-1	-1	-1	-1	-1	-1	-1	-1	-1	-1	-1	-1	-1	-1	-1	-1	-1	-1	-1	-1	-1	-1	-1	-1	-1	-0.189065	-1	-1	-1	-1	-1	-1	-1	-1	-1
Contig87-snapTAU.99	-1	-1	-1	-1	-1	-1	-1	-1	-1	-1	-1	-1	-1	-1	-1	-1	-1	-1	-1	-1	-1	-1	-1	-1	-1	0.0411292	-1	-1	-1	0.503598	-0.532087	-1	-1	-1	-1	-1	-1	-1
Contig9-snapTAU.143	-1	-1	-1	-1	-1	-1	-1	-1	-0.0307045	-0.363746	0.840105	1.0723	0.470838	-0.46619	-1	-1	-1	-1	-1	0.623994	-0.304572	-1	-1	-1	-1	-1	-1	-1	-1	-0.0827736	-0.481229	0.140145	-1	0.239344	0.437885	0.999752	-0.203736	-1
Contig9-snapTAU.183	-1	-1	-1	-1	-1	-1	-1	-1	-1	-1	-1	-1	-1	-1	-1	-1	-1	-1	-1	-1	-1	-1	-1	-1	-1	-1	0.284299	1.07645	-0.841974	2.04861	0.522795	2.30709	2.49632	2.31436	1.37912	1.41967	0.698057	0.101986
Contig9-snapTAU.184	-1	-1	-1	-1	-1	-1	-1	-0.301792	-1	-0.75957	-1	-1	-1	-1	-1	-1	-1	-1	-1	-0.409907	-1	-1	-1	-1	-0.345355	-1	-1	-1	-1	-1	-1	-1	-0.373145	-1	-1	-1	-1	-1
Contig9-snapTAU.38	-1	-1	-1	-1	-1	-1	-1	-1	-1	-1	-1	-0.79332	-1	-1	-1	-1	-1	-0.64189	4.69832	-1	-1	-0.0246194	-0.638302	-1	-1	-1	1.37467	0.394378	0.120634	1.34112	0.683193	2.99504	2.98271	3.333	2.10056	2.16168	1.19706	0.213309
Contig9-snapTAU.98	-1	-1	-1	-1	-1	-1	-1	-1	-1	-1	-1	-1	-1	-1	-1	-1	-1	-1	-1	-1	-1	-1	-1	-1	-1	-1	-1	-1	-1	0.0629414	-0.205357	-1	0.363057	0.0772665	0.762125	-1	0.432452	-0.0946977
Contig9-snapTAU.99	-1	-1	-1	-1	-1	-1	-1	-1	-1	-1	-1	-1	-1	-1	-1	-1	-1	0.157258	-1	-1	-1	-1	-1	-1	-1	-1	-1	-0.00516946	1.44567	-0.204526	0.043547	1.74506	-1	-1	1.44083	-1	1.4604	1.17653
Contig90-snapTAU.43	-1	-1	-1	-1	-1	2.62578	2.25102	4.13975	-1	-1	-1	2.54287	-1	-1	0.449267	-1	-1	-1	-1	-1	-1	-1	2.51048	-1	1.66483	-1	-1	-1	0.873241	1.15769	1.50111	2.76546	-1	-1	-1	-1	-1	-1
Contig91-snapTAU.108	-1	-1	-1	1.49073	-1	-1	-0.819137	-1	-1	-1	-1	-1	-0.475885	-1	-1	0.142777	-1	-1	-1	-1	-1	-0.619134	-1	-1	-1	-1	-0.692046	-1	-1	-0.0241885	-1	-1	-1	-1	-1	-1	-1	-1
Contig91-snapTAU.16	-1	-1	-1	-1	-0.842873	1.33529	-1	-1	1.22367	-1	1.59771	1.53492	-1	2.44996	3.8301	-1	-1	-1	-1	1.37841	-1	-1	-1	-1	0.780559	1.40292	-1	-1	-1	-1	-1	0.319572	-1	-1	-1	-1	-1	-1
Contig91-snapTAU.33	-0.064693	0.174633	-1	-1	-1	-0.510013	0.0592919	0.165091	0.582107	-0.165959	1.0165	0.298997	0.660535	0.104015	-0.387355	-1	-1	0.186466	-0.107709	0.322552	0.27185	-0.866486	-0.497564	-1	0.707285	0.23642	-0.454917	-0.355777	0.752881	-0.531373	0.184957	-1	-0.141134	-1	-1	-0.36193	-1	-0.350996
Contig91-snapTAU.72	-1	1.58309	-1	-1	-1	-1	-0.189185	-1	-1	-1	-1	-1	-1	-1	-1	-1	-1	-1	-1	-1	-1	-1	-1	-1	-1	-1	-1	-1	-1	-1	-1	-1	-1	-1	-1	-1	-1	-1
Contig91-snapTAU.85	-1	-1	-1	-1	-1	-1	0.732993	-1	-1	-1	-1	-1	-0.140602	-1	-1	-1	-1	-0.0562553	-1	-1	-1	-1	-1	-1	-1	-1	-1	-1	-1	-1	-1	-1	-1	-1	-1	-1	-1	-1
Contig91-snapTAU.88	-1	-0.20585	-1	-1	-1	-1	0.419897	-1	0.775815	-1	-1	-0.0770263	-1	-1	-1	1.05055	-1	-1	-1	-1	-1	-0.780486	-1	0.474323	-1	-0.410579	-0.398315	0.06379	-1	-0.577979	-1	-1	-1	-1	-1	-0.0393988	-1	-1
Contig93-snapTAU.30	2.54132	3.37129	4.76162	-1	2.06894	-0.0797137	1.74427	1.81892	2.27259	4.09595	2.39598	0.57193	1.27363	0.269949	3.05691	2.92493	0.690744	1.20777	1.1687	0.972993	0.680573	1.23568	2.25773	-1	-1	-1	-1	-0.562033	0.562439	1.16973	1.10514	-1	0.491947	-1	1.73905	-1	-1	-1
Contig94-snapTAU.56	-1	-1	-1	-1	-1	-1	-1	-1	-1	-1	-1	-1	-1	-1	-1	-1	-1	-1	1.20038	-1	-1	-1	-1	-1	-1	-1	-1	-1	-1	-1	-1	-1	-1	-1	-1	-1	-1	-1
Contig94-snapTAU.62	1.35511	3.8096	-1	-1	-1	0.477224	-1	-1	-1	-1	-1	-1	-1	-1	-1	-1	-1	-1	-1	-0.332842	-1	-1	-1	-1	-1	-1	-1	-1	-1	-1	-1	-1	-1	-1	-1	-1	-1	-1
Contig96-snapTAU.38	4.11016	4.26582	5.80311	3.56961	1.83688	2.70182	2.41014	2.82661	3.08114	3.27306	3.27965	3.63883	3.7716	3.25203	4.2781	3.33636	1.99084	2.90895	3.36774	2.83407	3.41094	2.15317	2.34645	1.47652	2.59536	1.64361	1.00788	1.00144	1.58715	2.05458	2.39724	1.74922	1.94734	2.25437	1.45077	1.90376	1.69852	1.27597
Contig96-snapTAU.53	1.08927	-1	-1	-1	-1	0.393249	-1	-1	0.890485	0.185325	-1	1.04302	-1	-1	-1	-1	-1	-1	-1	-1	-1	0.267846	-1	-0.0388561	-1	-1	-1	-1	-1	-1	-1	-1	-1	-1	-1	-1	-1	-1
Contig96-snapTAU.9	0.931689	-1	1.48975	-0.395035	0.727382	0.0719409	0.873367	-0.468165	0.336813	5.28196	0.932751	0.58347	1.03638	0.120243	0.976912	0.35032	0.956723	0.782301	0.281688	0.0822859	0.529606	-0.0337719	0.553133	0.233948	-0.162079	-0.138863	-0.0391017	-0.197658	-0.626102	0.150943	-0.260103	-0.483744	-0.120578	-0.175524	1.39567	0.746417	0.285968	0.257662
Contig97-snapTAU.136	3.9098	5.05638	5.41947	7.05461	4.43063	4.35164	4.53775	4.2184	4.99313	4.13603	3.18211	4.45051	3.6967	4.65431	3.89888	4.20928	4.86615	4.62408	4.85529	4.07374	4.6759	4.13816	4.39775	4.78117	4.99892	4.64703	4.79671	5.1875	4.83253	5.42218	4.97643	5.06213	5.18484	5.0148	4.18936	5.69442	5.4773	5.49748
Contig97-snapTAU.21	2.05458	3.19545	1.81924	0.500883	1.03253	2.57008	1.11707	1.95766	1.20192	1.36104	2.60224	0.940006	2.22841	1.47959	2.81671	1.54346	3.09998	0.979087	0.525931	0.770532	1.17044	0.485835	0.0497462	0.144064	0.448096	0.477394	0.899838	0.901663	0.31918	0.930556	1.07283	-0.288388	0.444735	0.925791	-0.446608	-0.243285	0.396668	0.290396
Iso_D.1.1	-1	-1	-1	2.9065	1.89655	2.78146	2.61356	2.42243	3.30787	3.14775	3.62906	2.59708	2.20336	3.1892	1.67066	1.73946	2.75812	3.26765	2.81672	2.02311	1.40397	1.29872	2.09994	0.950875	1.28532	0.235864	1.7845	1.01259	4.86045	2.79797	3.24495	0.541684	-1	0.552161	-0.0110293	-1	0.674555	-0.130779
Iso_D.10001.1	3.19406	2.48156	3.59114	2.99496	3.12396	2.32412	2.88103	3.67957	3.92779	2.58285	3.44505	4.48088	4.27216	3.48706	3.95739	2.14028	3.45747	3.18141	1.86537	2.20394	3.45197	2.68859	3.89836	2.47612	2.15475	1.51793	2.07925	1.42502	4.90409	2.94253	4.23361	1.51367	2.93565	1.16487	0.243296	0.807042	1.93885	1.55553
Iso_D.10020.4	5.33327	5.212	5.42021	5.73501	3.91984	3.33817	4.18091	5.19674	5.68018	6.43714	4.70393	5.10552	4.90949	5.27091	5.1	4.11528	4.92545	4.27926	3.6313	3.81289	3.40806	3.14753	3.05902	3.46593	2.77953	2.44852	2.93619	2.44428	4.09532	2.25413	2.28341	1.64507	2.56908	1.13578	1.16448	1.47726	2.28373	2.24954
Iso_D.10021.3	4.56064	4.95705	3.5685	4.32964	2.97602	3.64779	3.22462	4.25712	4.06822	2.86274	2.89908	2.98717	2.23078	3.14709	3.37005	3.47301	4.40849	2.90213	2.19946	2.08436	2.79444	0.896304	2.83132	2.02255	0.941956	1.2057	1.67161	1.28872	1.72395	0.616788	-0.261587	1.27993	1.09892	-0.544438	1.07798	-0.149144	0.0915418	0.599814
Iso_D.1006.1	5.79082	6.64287	6.71555	5.65208	4.90396	4.86298	5.46589	4.97771	5.7973	9.0343	5.20432	4.66669	4.82066	4.86569	4.41961	4.66286	4.67468	3.85135	4.754	3.88722	4.18974	3.45238	3.49479	2.98034	2.42623	1.89808	2.70018	2.94782	2.53381	3.38449	3.077	3.01552	2.19661	1.88458	1.31972	0.954486	1.04274	1.42815
Iso_D.10064.1_curated	3.15122	1.51959	3.15251	2.10641	2.06361	2.04089	-0.412441	0.722551	2.16203	1.14396	2.11606	1.77397	2.56475	1.60417	0.947237	2.39458	1.36542	0.585046	-0.381793	0.20948	1.09492	1.38684	1.51211	1.22428	1.40385	0.627301	0.342164	0.736458	0.773884	1.349	0.766717	0.245865	0.136508	0.0130434	-0.542031	0.398661	1.22275	0.556859
Iso_D.10113.1	0.908888	-1	0.823398	1.51696	-0.956325	-0.179911	0.091548	-1	-1	-1	-1	-0.177164	-0.398805	0.382616	-0.559736	0.744906	0.696513	1.0392	-0.394037	-0.120415	-0.455926	-0.25487	-0.113506	0.490135	0.866983	-0.251528	-0.479276	-0.330173	1.40994	-0.166484	0.577985	-1	-0.529116	-0.536197	-1	-1	-0.268636	-0.0723186
Iso_D.10123.1	-1	-1	-1	-1	-1	-1	-1	-1	4.68079	0.584886	3.95029	3.17116	3.64802	0.00571684	-1	-0.233894	-1	2.00183	3.64254	1.70531	1.42009	0.262818	0.32845	0.00191288	-1	-0.332246	2.13984	3.9887	2.64512	0.587955	0.300676	0.557372	0.601371	1.32446	-1	1.68444	-0.15322	0.913192
Iso_D.10131.1	-1	2.01418	-1	-1	-1	1.71368	-1	0.220761	-0.498528	-1	-1	-1	-1	-1	-0.348847	-1	-1	-1	-1	1.40997	-1	-0.844896	-0.451729	-1	-1	-1	-1	-0.675981	0.325722	-1	-1	-1	-1	-1	-1	-1	-0.90079	-1
Iso_D.10132.1	2.95744	2.37428	-1	2.19081	0.491093	1.04665	0.446464	2.76583	1.24726	1.20811	3.74603	2.41396	1.12296	1.29767	1.39363	-1	0.332159	0.854539	1.38761	2.50628	-1	0.038953	0.673222	1.05736	-1	0.584528	-0.500562	0.943404	0.809984	0.323033	-1	-1	-0.194539	-1	-1	-1	-0.332969	0.189368
Iso_D.10133.1	1.73441	0.078027	3.51571	2.03182	1.99356	2.56277	3.47177	3.00841	3.54052	4.01186	1.10492	1.64301	1.4634	1.23313	2.44518	2.8675	3.56937	4.27424	2.70812	2.71652	1.01472	2.05797	0.891408	0.797474	3.01474	3.10115	2.52696	2.9609	3.44221	1.5245	1.02717	0.783492	-0.341228	0.211143	0.0802073	1.17777	0.473952	1.29329
Iso_D.10149.3	1.39627	-1	-1	-1	0.340769	1.1021	0.289863	2.36117	1.45585	0.240185	0.684963	1.16594	3.19256	1.32603	-0.0517775	-0.124339	-1	1.20248	1.64264	0.855879	0.901444	0.545452	0.453291	0.414593	0.343651	-0.183876	0.0301168	-1	-0.438603	0.66872	1.21705	0.165327	0.235566	0.672537	-0.570721	-1	0.249533	-0.244134
Iso_D.10150.1	-1	-1	-1	-1	-0.967829	-1	-1	1.4696	1.50712	-1	0.170046	1.69084	1.11699	-1	-1	-1	-1	-1	-1	0.503749	1.37224	-0.745947	-1	-1	-1	-1	-1	-1	0.343382	0.523146	-1	-1	-1	-1	-1	-1	-0.914749	-1
Iso_D.10155.1	0.323968	2.65036	-1	-1	-1	-0.263272	-1	-1	-1	-1	-1	0.165464	-1	-1	-1	-1	-1	-1	1.10469	-1	-1	-0.68578	0.236124	-1	-1	-0.664989	-1	-1	-0.3787	0.689036	0.0338562	0.759962	0.638281	-1	-1	-0.16494	-0.825475	-1
Iso_D.10156.1	1.81666	2.05503	-1	1.48763	-0.388733	0.828378	0.198266	0.68905	0.259246	1.27177	0.0794591	0.206998	-0.675454	-0.115291	-0.768418	-0.282502	1.44105	-0.639108	1.07094	0.0274278	-0.177521	0.354398	-0.621036	1.00536	0.254777	-0.386129	-0.371216	-0.56658	0.402701	0.223524	0.493944	-0.719762	-0.235913	-0.47852	-1	1.36027	-0.429242	-0.659644
Iso_D.10200.2	0.864797	1.41181	2.23418	2.20261	0.927989	0.594066	-0.244657	1.8852	1.97215	1.94261	-0.128139	-0.310207	1.47645	1.32033	0.814065	0.744986	-0.122942	-0.0304438	0.507702	-0.0450584	0.00887812	-0.294444	-0.296767	1.17146	-0.496725	0.32585	-0.680132	-0.479005	0.978727	-0.733767	0.575428	-0.560615	-0.526924	0.061379	-0.180079	-1	0.060803	0.154785
Iso_D.10201.1	0.871466	-0.495013	-1	-0.219948	-1	-1	-0.658513	-0.402348	-0.292379	3.20129	0.8009	0.746647	1.81524	2.00151	-1	-1	-1	0.0233524	-1	-0.671354	-1	-1	-1	-1	-1	-1	-1	-1	-1	-1	-0.748527	-1	-1	-0.586507	-1	-1	-0.839216	-0.64856
Iso_D.10357.1	2.71495	4.17607	4.93401	3.26456	3.11587	3.84056	2.41279	3.15942	3.02723	2.85734	3.48168	3.65902	3.69732	3.80654	3.53767	3.97653	3.91989	2.88191	4.70855	3.33883	3.67317	2.93513	3.63656	3.47285	3.69561	3.23332	2.85961	3.84471	2.78603	3.85417	3.56655	4.2234	4.0793	4.31012	3.2812	2.86541	4.56214	4.69958
Iso_D.10390.2	3.75118	2.87388	3.51097	4.48088	2.69297	3.47051	4.04416	4.53578	4.53732	4.24548	4.32987	3.91441	3.07836	3.79778	4.55148	4.16502	4.50125	4.89304	3.64287	4.09387	3.79068	3.39457	2.37641	3.68017	3.49857	3.68112	3.74495	3.10977	4.85146	2.57331	2.47468	1.2698	2.26605	0.798327	1.49492	2.30682	2.12007	2.26296
Iso_D.10425.1	5.00156	6.45591	5.27849	5.7944	4.74258	5.72358	5.42394	5.72906	5.71261	4.97587	5.15158	5.51456	5.26525	6.05947	5.26354	5.39078	5.30974	5.56123	4.60907	4.87358	5.24282	5.09054	5.29333	5.42897	5.84228	5.54018	5.06525	5.56833	5.67629	5.71016	6.10189	6.35584	6.19321	5.75186	5.93724	6.17384	6.55406	6.95121
Iso_D.10432.1	2.00714	1.85444	-1	0.151652	-0.776477	0.228697	0.611922	0.541015	1.37368	-1	0.702818	0.998115	0.916794	0.634343	-0.434115	0.0686363	-1	-1	-0.0462732	0.589517	1.10608	-0.6002	-0.661795	-1	-1	-1	1.62008	1.55534	-0.605044	3.08772	2.11535	3.55637	4.3891	3.68202	3.73604	2.21267	1.77222	0.267215
Iso_D.10432.2	-1	5.07756	-1	2.97405	0.523447	0.694325	1.90976	0.434627	-1	1.72508	1.85554	1.43842	1.20859	-1	0.176818	-1	0.905164	1.31874	3.18323	0.803182	0.410169	1.08276	-0.288312	-1	1.15454	-0.32388	0.799474	-0.350593	0.526238	0.384754	1.33131	0.190437	-1	0.136928	2.45034	-1	-0.733424	-0.401998
Iso_D.10453.1	5.70139	4.22607	2.41425	6.56821	5.72321	4.70841	4.70372	4.9739	5.6793	5.12156	5.81808	6.46705	5.56506	5.93288	4.0076	3.73832	4.07176	4.56608	4.00603	4.6407	4.6109	4.35462	4.43216	3.12963	3.83317	2.74489	2.10545	1.67025	5.81435	4.00127	4.637	2.44319	1.50383	1.38525	1.19746	0.816529	1.46509	2.74646
Iso_D.10455.5	2.49493	2.96759	4.0287	1.23617	1.96057	1.45578	0.32394	1.57246	0.50259	-1	0.686551	1.66954	1.12124	2.33919	2.38432	1.6055	2.22363	1.86575	1.28439	0.428197	2.37998	0.286286	2.13929	0.506053	1.63155	0.0699733	-0.589768	-0.346884	2.49769	1.75571	2.25394	1.4386	0.730311	0.819882	-0.673676	0.082732	0.222429	0.439757
Iso_D.10460.1	-1	-1	-1	-1	3.7664	-1	2.36769	-1	-1	2.44794	2.56145	1.86177	-1	0.788206	-1	-1	-1	-1	-1	-1	-1	-1	-1	-1	-1	-1	-1	-1	-1	-1	-1	-1	-1	-1	-1	-1	-1	-1
Iso_D.10501.2	3.49478	2.68088	2.88487	3.93586	2.86321	1.84344	1.96187	3.03699	3.34411	3.82867	2.36237	2.50672	2.82123	2.45253	2.86136	2.25728	1.68273	1.54858	3.75733	1.89201	1.98871	1.84825	0.97554	1.73471	1.96298	0.36926	-0.022209	0.514915	0.655883	0.291193	0.586582	-0.254533	0.142821	0.383703	-0.355616	0.514917	-0.733506	-0.293013
Iso_D.10508.6	0.00203775	1.36558	-1	-1	1.20838	-0.243584	0.100699	-0.72697	1.02695	-1	-1	1.11987	0.166876	1.45412	0.0999594	1.41335	0.333598	1.34838	-0.443318	0.273714	1.10675	0.559	1.60054	-0.178988	0.863907	-0.30937	-0.128929	-0.525186	-0.392483	0.599801	-0.178122	-0.338811	0.374984	0.0926935	-1	-1	-0.447665	-0.607417
Iso_D.10518.1	6.76208	6.18249	3.19081	-1	-0.861095	5.29444	-1	-1	4.43188	6.13822	5.93828	6.60529	5.87017	5.93569	5.98518	-0.57199	-0.308863	-0.535394	6.06433	6.28491	5.25948	6.73233	7.26233	1.11822	-0.0147178	0.0714619	1.94136	3.86027	9.24925	8.27625	8.72646	6.72879	8.0725	6.02865	1.39821	1.99572	0.498676	0.1423
Iso_D.10526.1	3.51991	3.25339	3.10432	2.86431	1.35057	0.23976	1.11325	2.02053	1.03808	2.14858	1.04876	1.4443	2.64906	2.40108	1.68287	2.24908	3.25714	0.835681	0.611739	0.755148	1.43407	0.630269	1.28058	1.10683	1.06712	0.0248937	0.448945	0.395718	0.141544	-0.001059	0.396868	0.772685	1.97466	1.28658	0.942648	1.16393	1.11054	0.879015
Iso_D.106.2	0.891177	1.78669	1.59051	1.63264	-0.364797	0.387143	0.962818	0.709385	1.11247	1.61685	1.42677	0.705768	1.70766	0.81603	1.99587	0.402426	0.47028	0.696291	-0.0639482	0.413979	-0.336943	-0.0885336	-0.212294	-0.176631	-0.109701	-0.260354	-0.460029	-0.336043	-0.0155339	-0.318026	-0.619758	-0.722352	-0.460106	-0.754668	-1	-1	-0.625842	-0.56137
Iso_D.10632.2	2.80729	1.91897	2.35718	2.32938	2.49992	1.98878	1.88971	2.90604	2.06367	2.197	2.58093	2.26475	2.49715	1.07593	2.61671	1.24126	3.14062	1.84001	1.8772	1.12356	1.94697	1.77846	1.07872	1.8578	2.26016	2.06426	1.03313	2.6159	1.91399	1.89653	2.33416	2.33001	2.78289	3.32304	3.40349	3.22627	4.45884	4.01819
Iso_D.10645.2	5.79943	6.1816	5.96386	5.77287	5.55057	5.26324	5.87785	6.00286	6.57449	5.80773	5.52721	5.74014	5.65612	6.09303	6.17005	5.79949	6.56613	6.03674	5.40567	5.66941	5.31291	5.3777	5.25606	5.38674	5.74024	5.02983	5.22446	5.72607	5.96932	5.51517	5.50778	5.23331	5.45517	5.02333	4.15375	5.0253	5.42338	5.58983
Iso_D.10706.1	9.58626	9.75998	10.255	10.3349	10.9183	9.79177	10.1648	10.3138	10.5562	10.9833	10.8157	10.2325	10.5183	10.5764	10.4091	9.89944	10.9437	10.819	10.4081	11.0392	10.6376	10.0373	9.91862	10.2786	11.0434	10.9362	10.4854	10.7392	10.1346	10.3554	10.4523	9.97675	10.4477	9.97711	10.642	10.9721	10.5487	10.8999
Iso_D.10711.1	5.00711	5.89431	6.45475	5.66729	3.90565	3.74209	4.1746	4.50034	4.6185	4.46803	4.52608	4.00263	4.84369	4.5624	5.32424	5.37081	6.17408	5.05058	5.18714	4.48943	4.87807	3.96319	4.40331	5.06447	5.22477	4.71202	4.12606	4.80968	4.05415	4.93751	4.5114	5.70734	4.83997	5.18705	4.06082	5.14013	4.97726	5.23942
Iso_D.10712.1	5.12139	5.31312	6.1449	5.68629	5.52776	4.6451	5.41803	5.19965	5.57415	5.55553	5.10624	5.17182	5.28854	5.77358	5.91608	5.76464	6.58241	5.6311	5.20913	4.93315	4.97028	4.90162	4.73333	4.94634	5.44702	4.72055	4.53466	5.25093	5.24613	5.26564	5.1354	4.92657	5.4342	5.06441	4.38069	4.25779	5.07349	5.20953
Iso_D.10714.1	4.09669	3.91697	4.68123	5.31171	4.76902	3.73327	4.08901	3.72145	4.18414	3.60332	3.03419	3.87319	3.44146	3.81916	3.31405	2.99797	2.94512	2.84564	3.98314	3.1399	2.69557	3.39532	2.451	1.95951	0.88774	1.42364	1.34462	2.29602	2.8139	2.51714	2.60477	1.52341	2.31205	2.31988	0.801699	0.663381	1.59457	0.616963
Iso_D.10782.1	4.05633	4.64241	4.97495	4.17454	8.29431	3.6539	4.03185	3.75185	4.45585	3.63656	3.61832	3.15182	3.66303	3.78518	3.03582	4.21852	3.5252	3.84361	3.06422	3.59383	3.89373	2.97501	2.91583	3.19135	3.88424	3.40368	3.4702	3.81963	3.81053	3.66624	3.59336	4.23716	4.85476	5.41494	5.2998	5.86162	7.30388	7.45943
Iso_D.10812.1	0.320384	-1	2.13483	-1	1.15581	0.344412	0.521455	-0.326016	1.34178	-1	-1	0.460057	-0.0896963	-1	-1	1.01325	-0.480639	1.45196	-1	-0.176908	-1	-0.265236	0.0356084	-1	-1	-0.0963277	-1	1.12318	-1	-0.923783	0.555906	-1	-1	0.0622604	-1	-1	-1	-1
Iso_D.10815.2	2.08897	1.91741	3.74819	3.24729	2.14535	2.35716	2.85919	2.81132	3.90539	3.16958	2.84013	3.99314	3.51133	2.28053	3.80089	1.74241	2.74151	2.99988	2.71861	2.68743	2.69839	2.80398	0.942842	1.11866	1.50186	1.76059	1.62686	3.17289	3.426	2.39334	2.51287	1.76871	3.47192	3.43727	2.64505	2.12635	3.83312	3.92019
Iso_D.10821.1	3.58009	2.90223	2.57515	2.90068	2.31448	2.61457	1.66986	2.48174	2.23926	2.80125	1.08929	1.70593	1.89267	1.32776	3.13866	1.68113	-0.296807	1.11362	0.512853	0.182976	2.31696	0.683803	0.267645	0.826489	0.0320128	-0.233166	0.313214	0.280796	-0.178167	0.38498	-0.142205	-0.767451	-0.111239	1.55205	-0.757845	0.10066	-0.662393	-0.663054
Iso_D.10828.1	-1	-1	2.61148	-1	-0.981138	-1	-1	2.74629	3.57418	3.23833	-1	-1	-1	-1	-1	-1	-1	2.89973	0.000955204	-1	-1	-0.843441	-1	-1	-0.266384	-0.546645	2.04401	0.729931	-0.864321	-0.399327	-0.0819742	-0.201189	-0.601765	-0.512069	-0.328289	0.563198	0.234228	-0.339138
Iso_D.10883.2	-1	-1	-1	-1	0.962919	1.72241	-0.0224838	0.580116	-0.0484239	2.28743	-1	1.10405	0.955	0.46485	-1	0.440066	-1	-1	-0.208508	-1	-0.319364	1.38163	1.29676	-1	0.263706	0.76391	0.12319	1.41492	1.25207	1.16549	1.12841	1.06394	2.16175	2.38964	1.32739	0.291117	2.39	2.55663
Iso_D.10884.2	2.6231	2.63739	2.76874	0.565444	-0.799515	1.16236	0.349746	0.904094	1.52404	0.214969	0.886152	0.652614	1.84122	0.3583	1.39002	-1	0.476682	0.830358	1.25442	1.38989	0.203054	0.663738	0.180742	0.622635	0.151136	0.155832	0.910328	0.504096	0.765453	0.218166	1.01702	-0.0350474	1.32022	1.93718	0.00604386	-0.202996	1.75667	1.18077
Iso_D.10899.2	8.04688	7.23885	6.73131	8.37107	5.34801	4.44477	4.57673	3.50955	5.38686	5.35281	6.24807	6.93838	6.6252	6.11427	4.93181	3.82954	4.17978	4.14433	3.55398	5.01326	5.25612	5.16743	4.92058	4.54103	3.31879	3.26364	4.09549	6.26713	5.95221	6.53529	6.88052	6.6323	6.93202	6.73916	5.19251	4.39564	5.32372	4.00288
Iso_D.10916.2	-1	-1	-1	-1	0.000330151	-0.868014	-0.77185	-0.670057	0.788842	-0.240685	1.88117	-0.839035	-1	-1	-1	-0.133845	-1	-0.827859	-0.275442	-1	-1	-0.936495	-1	0.192765	-0.671461	-1	-1	-0.439061	-0.2454	-0.313695	-0.511142	-1	-1	-1	-1	-0.409365	-0.922654	-1
Iso_D.10917.2	0.870759	-1	-1	-1	0.754509	0.273911	1.87439	5.03459	2.45314	5.27256	-1	-0.803203	-1	-1	-0.808714	0.810866	1.72424	5.28325	0.304279	-0.180178	0.365306	-0.760634	-0.840326	-0.704429	0.544537	4.09081	0.799544	0.862631	-0.525275	-1	-1	-1	0.235643	-1	-1	-0.146989	-0.6877	-1
Iso_D.1095.1	2.67486	4.07768	4.41522	4.08651	0.980973	3.99585	0.630975	0.24528	0.592337	1.17917	0.850752	1.05429	0.961699	1.83971	0.464312	1.81262	1.52579	1.84328	1.10759	-0.518762	1.63608	0.517494	2.22916	2.10002	0.23431	0.283023	-1	-1	-0.470644	-0.65647	0.440321	-0.30566	0.909229	1.19064	-1	0.296653	-0.216814	0.375207
Iso_D.10968.1	-1	-1	-1	-1	-1	-1	-1	-0.8241	-1	-0.41026	-1	-0.345323	-0.480489	-1	-1	-1	-1	-1	-1	-1	-1	-1	-1	-0.862447	-1	-0.704255	-0.510851	1.44047	1.57209	3.0906	1.87888	3.35515	2.927	2.76547	1.91591	0.644605	1.31046	-0.118604
Iso_D.11061.1	4.93356	5.22184	4.33986	6.13374	6.56596	6.02907	5.98532	7.00485	7.6164	7.01687	5.38717	4.82682	4.85221	4.58678	6.07721	5.78796	5.31383	7.01147	6.63169	6.22642	5.08965	4.81908	4.80439	5.01075	5.78394	5.93828	5.71456	6.41278	5.52224	5.1231	5.10889	4.83724	5.99635	6.41816	4.80839	4.9838	6.40537	6.58564
Iso_D.11069.1	6.24477	5.67142	6.6935	6.06278	4.65023	4.70869	5.85633	5.50116	5.53327	6.13088	5.59256	5.49555	5.89402	5.97782	5.22195	4.35248	4.59059	5.05511	4.02628	3.9997	5.22325	4.78673	4.23978	3.52594	4.04533	3.71595	2.52516	3.21757	3.54742	4.08213	4.62053	3.39974	3.86065	3.45364	3.14853	3.04759	2.61823	3.38357
Iso_D.1110.1	1.76011	2.91123	2.07424	2.93194	1.8602	1.91285	1.8298	2.88112	2.85477	2.26671	1.77316	0.929953	2.47511	1.4538	2.26514	2.87088	2.10968	1.17081	0.685623	1.14065	1.89643	1.91003	2.00999	2.24834	2.11673	2.09079	0.643429	1.61502	0.566321	1.84922	2.32733	2.03927	2.60494	3.15571	2.40691	3.66816	3.13933	3.11158
Iso_D.11118.2	0.38014	-1	-1	0.117043	-1	-1	-0.0743864	-0.582421	-0.358454	-0.664865	-1	-0.786158	-0.0760728	-0.431261	-0.337055	-0.560685	-1	0.178296	-1	-0.442171	-0.24875	-1	-0.77929	-1	-1	-0.694849	-1	-0.810104	-1	-0.922483	-0.645462	-1	-0.46011	-0.655852	-1	0.303843	-0.421848	-1
Iso_D.11132.1	0.978054	0.924463	0.781842	-1	-0.250316	-1	-0.925428	1.218	-0.439646	-0.305854	-1	-0.760506	-0.22629	0.122444	-1	-0.0324843	-1	-1	-1	-1	-1	-1	-1	-1	-1	-1	-0.00529645	0.677209	-0.148652	1.07968	0.500583	1.28804	1.12257	0.937797	-0.296682	0.77924	0.189621	-0.384103
Iso_D.11188.3	1.93315	2.18746	4.94997	2.81914	2.18411	2.07093	1.87349	2.27567	2.76472	0.587838	1.84088	1.55338	2.4957	2.24341	1.59331	2.8052	2.84443	1.23433	-0.702889	0.123931	0.351732	0.337042	0.375613	1.78403	0.705909	0.0746047	-0.479322	0.273302	-0.0496522	0.0802083	1.21379	0.464154	1.29947	0.544388	1.4626	0.482219	0.420753	0.360331
Iso_D.11191.2	-1	-1	-1	-1	-1	-1	-1	-1	-1	-1	-1	-1	-1	-1	-1	-1	-1	-1	-1	-1	-1	-1	-1	-1	-1	-1	-1	-1	-1	-0.487827	-1	-0.499932	-1	-1	0.028344	-1	-0.830535	-1
Iso_D.11220.1	4.74077	1.77303	5.40903	4.40576	3.49435	3.4027	4.60255	2.20325	0.934958	7.62375	8.20983	6.99116	6.78057	0.389797	5.72376	7.14663	6.01324	4.77355	3.54608	7.23651	6.34131	3.41951	3.07015	6.68489	7.53248	7.23872	2.50335	1.63419	6.79587	6.24065	3.42185	2.98309	3.40485	3.19303	4.23806	4.09182	3.61804	5.03925
Iso_D.1126.1	3.06294	4.50233	4.60374	4.61344	5.15664	2.46716	2.95039	4.02407	3.70903	6.87054	3.58905	3.09646	3.42379	4.13589	4.3865	3.85319	5.56677	4.34748	4.55955	3.78539	4.06264	3.86791	4.33725	4.29358	4.38591	4.39555	4.00528	4.51899	4.07529	4.04172	3.97989	4.98412	4.4977	4.79073	5.09153	6.13759	4.82768	5.1754
Iso_D.11333.2	2.18507	1.37121	1.38106	0.145322	0.916097	0.999644	1.13976	1.6176	1.93686	1.38793	0.78994	1.11475	0.564454	1.97136	0.815626	0.411143	1.55467	0.468741	0.244574	0.288353	0.495742	1.31518	0.617196	0.79366	-0.0360946	-0.325168	-0.660955	0.0443714	0.49977	-0.0850384	0.458242	0.959448	-0.195921	0.150528	-0.728789	-0.18334	0.0488224	-0.120566
Iso_D.11420.1	3.99497	4.06837	-1	2.65034	2.31556	0.794895	-1	1.44009	2.63121	-1	2.22177	3.05995	4.13094	4.68098	4.01216	1.94631	2.03157	1.90813	3.94412	5.11777	3.63582	2.75829	4.10961	2.47407	0.278877	0.243245	0.206649	-1	3.19689	4.75567	5.88636	1.4141	2.9703	-1	1.97774	0.955604	1.94823	1.20264
Iso_D.11520.2	2.33242	0.799142	-1	-1	0.31223	-0.213392	-0.401824	1.07201	0.30814	0.31262	0.605604	-0.16993	0.215426	0.570223	2.15729	0.352649	0.824605	0.793899	0.256771	0.607361	1.16449	-0.220375	0.603931	-0.296567	0.160976	-0.124385	-0.907317	-0.393483	-0.364365	-0.160144	-0.385946	-0.366307	0.382534	0.21591	0.710982	-0.537452	-0.37042	-0.631354
Iso_D.11569.1	0.96353	2.8878	-1	1.09168	0.794975	0.98399	-0.25374	0.519661	0.714667	1.46679	1.1155	1.28511	0.679377	-0.0550794	1.26915	0.939097	1.36542	1.27714	0.986572	0.967464	0.985948	1.20109	-0.376639	0.651641	1.59238	0.644192	-0.462534	0.565028	0.77905	0.374155	0.297883	1.15347	0.695503	0.587038	0.696724	1.45903	1.76734	1.99889
Iso_D.11613.1	0.461147	1.76791	1.81016	1.43623	2.20096	1.11142	0.974045	0.786189	1.43546	1.23077	-0.214681	0.469299	0.334454	1.65038	1.11504	0.820057	1.99639	0.532023	0.143241	0.439276	0.672131	0.483133	0.710988	0.106536	0.193665	-0.0743099	-0.232865	-0.506434	-0.318184	-0.873743	-0.519406	-0.489865	-0.129511	0.389436	-0.620925	-1	0.177528	-0.471975
Iso_D.11649.1	1.86163	-1	-1	0.677315	-0.694108	0.382389	1.19418	1.25371	1.40363	1.00319	2.07932	0.6306	1.13435	1.94584	-0.3517	0.555672	1.02039	0.993824	2.49727	0.947539	0.934376	0.312669	0.544996	0.22859	0.787671	0.892695	0.878901	0.819946	-0.184373	1.16645	0.761073	0.260013	0.51089	0.743591	-1	0.405772	1.43958	0.26672
Iso_D.11654.1	0.81316	-0.106839	2.11992	1.46717	-0.511892	0.799773	1.20785	0.545075	0.59367	1.33597	1.26311	0.469269	0.667048	0.261761	0.417079	1.39814	0.503894	0.781639	1.68874	0.295875	1.50543	0.252534	0.594754	1.00966	1.88006	1.18454	0.732874	0.410383	0.603548	0.67462	1.0907	1.66174	1.20022	1.66504	1.03125	2.63781	2.06372	2.28028
Iso_D.11760.1	9.48933	10.3102	11.0038	9.91065	9.72797	9.41179	9.7892	10.1558	10.1717	10.5895	10.2546	9.74757	10.2802	10.7787	10.1704	10.2395	10.6008	10.6409	10.3585	10.9061	10.6791	9.76962	9.85075	10.1704	10.8462	10.7561	10.0355	10.4071	9.71026	10.2107	10.0812	10.0625	10.1867	9.91211	10.7816	10.1539	10.3602	10.5736
Iso_D.11821.1	2.18325	-1	2.12983	-1	0.43713	0.02569	1.41921	1.7835	-1	-1	0.656002	-0.457809	0.453651	0.471662	-0.797873	-1	-1	1.41814	-1	-0.634097	0.999658	-0.389437	-0.418542	-0.135129	-0.148102	-1	-1	-1	-1	-1	0.120372	-0.654084	-0.323143	-1	-1	-1	-0.563498	-0.451962
Iso_D.11992.1	-1	0.536729	1.24616	-0.126839	0.797146	-0.415454	-0.145238	0.18636	-0.27026	0.810961	0.267035	-0.101685	0.203885	0.192375	-0.589642	0.530536	0.26273	-0.0899462	-0.284789	-0.110349	-0.053915	9.93187e-06	-0.384693	-0.200467	0.0153589	0.829317	-0.534639	0.145805	0.246793	-0.10098	0.0506613	0.295792	-0.0565232	0.515193	-0.109222	0.171459	0.40797	0.545014
Iso_D.11993.1	-1	-1	-1	-1	-1	-1	-1	-1	-1	-1	-1	-1	-1	0.143379	-1	-1	-1	-1	-1	-1	-1	-1	-1	-1	-1	-1	-1	-1	-1	-1	-1	0.121404	-0.42334	0.177466	-1	-1	-0.419102	-1
Iso_D.12027.2	0.663482	0.759438	-1	1.36768	1.83662	0.445671	0.473268	0.675353	0.893576	0.617386	-0.286863	0.472461	0.427416	0.95969	-0.21702	0.531996	0.753086	0.231592	-0.401165	-0.00968829	-0.291148	-0.0789738	-0.152223	0.426799	-0.248049	-0.355881	-0.334113	-0.0558614	-0.0711319	-0.00728214	-0.406096	-0.0338759	0.0397413	0.594132	0.0212467	-0.63807	0.427354	0.193547
Iso_D.12072.3	2.63939	2.6297	1.61181	1.3439	2.02228	1.44445	0.863483	1.8371	2.16603	2.95992	1.5587	0.889192	2.18978	2.61309	2.44228	-0.143441	1.34032	0.692439	0.173649	2.16022	1.76264	1.10474	2.36903	1.83476	0.634374	-0.134109	0.0142848	0.110188	1.90978	1.18465	0.459103	1.78215	2.2848	1.80027	0.731752	1.02527	0.0913546	-0.303058
Iso_D.12073.2	2.58871	-0.475817	-1	0.32168	0.706464	1.05272	1.45067	1.19733	0.986945	4.40418	1.74545	0.888428	0.681766	0.649871	0.911107	1.71293	1.13801	2.10175	0.453054	1.91099	0.383814	0.00385762	0.917078	1.35216	0.949072	-0.0136762	1.36953	-0.218089	0.316468	-0.217779	0.227132	0.139567	0.533348	-0.569887	-0.670699	-0.354154	-0.755917	-0.548262
Iso_D.12076.1	10.069	4.8191	6.31664	6.47144	5.07445	5.44383	-1	6.07678	5.30152	8.83835	4.47053	4.99362	3.88764	6.3364	0.870946	-1	-1	-1	-1	4.71807	4.42292	3.74417	-1	2.90043	4.09053	-1	-1	-1	-1	-1	-1	-1	-1	-1	-1	-1	-1	-1
Iso_D.12077.2	2.52936	3.77438	-1	4.58451	3.77488	1.86817	2.86889	3.01429	3.92674	1.94561	1.86589	2.73543	1.84269	2.33054	3.10952	2.54057	-1	1.76594	-1	2.97565	3.7835	2.0564	2.13669	2.32568	1.90856	0.670197	0.580054	-0.289395	1.61113	0.756026	2.06586	0.18813	0.524283	-1	-1	-1	-0.137154	-1
Iso_D.12105.1	-1	-1	-1	-1	-1	-1	-1	-1	-1	-1	-1	-1	-1	-1	-1	-1	-1	-1	-1	-1	-1	-1	-1	-1	-1	-1	-0.352772	-0.553053	-0.694195	0.243078	0.0636283	0.42628	0.171898	-0.294154	-0.697584	-1	-0.399535	-1
Iso_D.12122.1	0.288924	1.96399	-1	-1	-1	3.66668	1.36005	0.190177	1.76707	-1	-1	-1	-0.0116094	1.58979	0.229881	0.950018	1.95786	-0.291313	0.884583	0.694132	0.0112526	0.119218	1.40951	-0.0788836	-0.374745	-0.231957	-0.134514	1.13604	-0.0424955	-1	-0.0982321	-0.357765	-0.548797	-0.263966	-0.246373	-1	-0.202644	-0.424988
Iso_D.12123.1	2.30963	2.98739	4.23822	3.21732	2.02	0.685891	1.83824	1.57574	2.46971	1.52565	1.37523	1.53687	1.77292	0.846055	2.45465	1.3483	1.14241	1.83066	1.07742	1.43062	1.52628	0.595553	1.24131	1.69242	1.69012	0.388452	0.402584	0.0687975	1.70323	0.0296678	1.00282	-0.64701	0.370176	2.19766	-1	-1	0.822354	-0.463411
Iso_D.12197.1	-1	-1	-1	2.01228	-0.829243	3.10849	1.04869	-0.816493	1.46931	-1	-1	0.686214	-1	-1	4.20385	3.09064	2.4174	1.23852	-0.253229	0.145111	1.22993	0.291658	0.788617	1.33154	0.586614	-0.109364	-1	-1	0.295006	-0.366852	-1	-0.3028	0.707547	-1	-1	-1	-1	-1
Iso_D.12199.1	-1	-1	-1	-1	-1	-1	0.283411	-1	1.45704	-1	-1	-1	-1	-1	-1	1.33008	0.0980617	2.27196	-1	-1	-0.039912	1.05113	-1	-1	1.46443	-1	-1	0.700594	1.29792	-0.497683	0.785574	0.621241	-1	1.01838	-1	-1	-0.827693	0.115235
Iso_D.12200.3	1.42722	-1	4.15513	2.17382	3.38307	0.851549	0.719711	0.948781	0.663239	0.138205	0.406573	-0.244988	-0.341148	0.278144	2.17353	2.44819	2.27818	1.09307	-0.771241	0.555824	1.06214	-0.294726	0.695563	1.50022	1.65893	1.36489	0.452842	2.18338	0.965223	0.419935	1.63734	1.26596	0.885914	1.85106	-1	0.228006	0.635042	0.268976
Iso_D.12202.1	2.12635	1.97878	-1	2.08788	-0.115063	1.47612	2.63628	0.983799	2.10354	1.5418	0.895373	-1	0.151484	-1	4.17454	2.7493	1.4437	1.4983	-1	0.700562	0.898963	0.0855171	0.0863051	1.348	1.9323	2.14073	2.1327	0.936351	0.993532	1.31873	0.469315	0.984793	1.5847	0.936283	1.33613	2.18031	1.47926	1.76378
Iso_D.12231.1	0.643074	-1	-1	0.677793	-1	-0.724723	-1	-0.0466131	-0.340067	0.859399	0.163369	-0.21103	-1	0.957656	0.600951	0.110566	0.288844	-0.457677	-1	-0.559192	-0.109289	-0.681857	-0.13043	-1	-0.64691	-0.127814	-0.825187	0.0278237	0.437135	0.115376	-0.101082	0.318491	0.337602	0.0481133	-0.191036	0.0733189	0.238643	-0.71481
Iso_D.12279.2	-1	-1	-1	-1	-1	-1	-0.0458872	-1	0.20245	-1	-1	0.597186	0.950957	-1	-1	-0.318654	-1	-1	-1	-1	-0.489374	-1	-0.559145	-0.46404	-1	0.391215	1.50915	0.647902	-0.315417	0.827737	0.214042	2.23859	2.1594	2.65332	1.71872	0.515655	0.917444	-0.513389
Iso_D.12281.1	-1	-1	-1	-1	-1	-1	0.995354	-0.272435	-1	-1	-1	0.120639	0.980874	-1	-1	-1	-1	-1	-1	-1	-1	-1	-1	0.477522	-1	-1	-1	-1	-1	-1	-1	-1	-1	-1	-1	-1	0.400691	1.38583
Iso_D.12383.1	3.93296	2.55055	4.54643	3.36935	2.58805	1.42675	2.51437	1.2952	1.5931	0.261147	3.20242	1.92294	2.12803	2.68237	3.56517	2.66144	3.14812	3.27318	2.7625	3.27556	3.22804	1.99468	2.51048	1.88305	2.97108	2.65661	1.21713	1.94879	1.99623	2.47323	2.78156	1.37163	2.1024	0.298906	1.71856	0.693203	0.855524	1.0892
Iso_D.12412.1	-1	-1	-1	-1	-1	-1	-0.207394	0.442361	1.06581	0.632139	-1	-1	-1	-0.926861	-1	-0.72855	0.105523	1.72729	1.40988	-1	-1	-1	-1	-1	-1	1.19261	0.918034	-0.234375	-0.347949	-0.688449	-0.930835	-0.871626	-1	-0.859451	-0.894035	-1	-0.879677	-0.932816
Iso_D.12425.1	-1	-1	-1	-1	-1	0.493913	1.4499	-1	1.48148	-1	2.1222	0.833623	1.93169	0.509035	0.413296	1.831	-1	1.80761	-1	0.152101	-1	0.668538	-1	-0.00592239	-1	-1	-1	-1	-0.454087	-1	-1	-1	-1	-1	-1	-1	-1	-1
Iso_D.12473.1	-1	0.742854	-1	1.36237	-1	-0.501822	-1	-1	0.87335	-1	0.116793	-1	-1	-1	2.31925	-1	-1	0.560818	-1	-0.260744	0.18319	0.725003	-0.273327	0.0416654	0.344999	0.117701	-0.439967	0.273194	-0.44173	0.176221	0.0120212	1.48054	0.641528	0.908379	1.40227	0.621219	1.12724	0.68355
Iso_D.12564.2	-1	-1	-1	-1	-0.973601	0.423378	-1	-0.360177	-1	-1	1.6151	1.12989	-1	-1	-1	-0.0369795	-1	-0.569528	-0.449409	-1	-1	-1	-1	-1	-1	-1	-1	-1	-1	-1	-1	-1	-0.0812997	-1	-1	-1	-1	-1
Iso_D.12577.1	0.971345	-1	-1	-1	-0.971032	-0.747622	-1	-0.656421	-0.35273	-1	-1	-0.693941	-0.824749	-0.395249	-1	-1	-1	-1	-1	-1	0.310654	-1	-0.875378	-0.70642	-1	-0.616989	-1	-1	-0.631033	-1	-0.849761	-1	-1	-1	-1	-1	-0.636765	-1
Iso_D.12578.1	-0.339313	1.31432	-1	-1	-1	-0.247143	-0.813648	-1	-1	-1	-0.243535	-0.591887	0.974551	0.015816	-1	0.736443	-1	-1	-1	-0.642512	0.394425	0.258574	-0.111779	-0.656054	-0.641047	-1	-0.974755	-1	-1	-0.213984	-0.408609	-1	-0.610286	-0.757349	-1	-1	-0.953428	-1
Iso_D.12681.2	-1	-1	-1	-1	-1	-0.926333	-1	-1	-1	0.0594537	-0.17182	-0.570665	-1	-0.544976	-1	0.447105	2.9123	-0.736371	-0.509495	-1	-0.516182	-0.871578	-0.541441	-0.748992	-0.661374	-0.810802	-1	-1	-1	-0.953279	-1	-0.806291	-0.53299	-1	-1	-1	-0.979591	-0.818951
Iso_D.12702.1	-0.426639	0.0999658	-1	-1	-0.00701871	-0.799399	-1	-0.771878	-0.433252	0.740256	-0.678251	-1	-0.053046	-1	-0.818821	0.0113009	0.0904232	0.350682	-0.908822	-0.154746	0.663911	-0.876708	-0.347436	-0.496266	-0.692796	-0.763454	-1	-0.751031	-0.806214	-0.868474	-0.815226	-0.887836	-0.39532	-0.662301	-1	-1	-0.885482	-0.824659
Iso_D.12727.1	5.68218	5.45317	6.03664	5.77987	4.96444	5.3338	5.61595	5.26528	6.28522	6.24672	6.01722	5.15599	5.33525	4.48894	6.28253	5.60634	4.9809	5.7535	4.73723	4.90987	4.88863	4.11514	3.58463	4.20025	4.49239	4.71165	4.03975	4.7606	4.98146	4.11175	4.86029	4.64493	4.62115	4.23345	3.46109	4.70625	4.43526	4.17448
Iso_D.12741.1	3.16202	-1	-1	-1	0.767112	0.134574	-1	2.335	2.42583	1.91467	2.50174	2.61473	1.40607	0.526015	4.70546	0.654085	1.96577	-0.412161	1.48194	2.92592	2.00648	1.3405	0.986292	0.792335	-1	-0.220721	0.401759	-0.27752	1.8704	0.802714	-0.396239	0.088011	-1	-0.0571356	-1	-1	-0.325984	-0.580128
Iso_D.12784.1	1.58878	-1	-1	0.0617618	0.808679	0.75962	1.71444	0.812111	0.698098	1.07897	0.910767	0.398869	2.05579	1.58897	2.00646	1.4306	1.34021	-0.508994	0.545125	-0.141395	0.073322	0.995157	0.687214	0.101628	1.22719	0.386804	0.17615	0.421679	0.919511	-0.258857	1.26144	1.89497	0.791378	1.60505	-0.542031	-1	1.94483	0.976555
Iso_D.12794.2	2.12088	2.21154	2.96446	2.00788	1.7266	1.72587	2.26183	2.07467	2.70421	2.59164	2.83408	2.51942	2.93379	2.64005	3.76175	3.49707	3.22855	2.71197	2.86863	3.07766	3.13518	2.66259	2.23335	2.43846	2.38476	1.95653	1.42554	1.9584	2.52859	1.23246	1.9131	1.40029	1.82284	1.64986	0.676109	1.65755	1.68709	1.82202
Iso_D.12809.1	10.0588	10.9085	11.2138	10.9292	10.7842	10.6443	11.2308	11.4232	11.5964	12.1258	11.5146	11.2562	11.6091	11.6724	11.1202	11.14	11.8859	11.659	11.1884	11.7493	11.6119	10.9583	11.2192	11.6401	12.1451	12.2817	11.5375	11.656	10.992	11.2888	11.4231	11.4477	11.7802	11.6721	11.8693	12.0847	11.823	11.8045
Iso_D.12886.1	-1	-0.110208	-1	-1	-1	-1	-1	-1	-0.366267	-1	-0.490809	-1	-0.656683	-1	-1	-0.0705358	-1	-1	-0.515041	-1	-0.155897	-0.774752	-0.792966	-1	-0.747381	-1	5.23417	2.86207	1.3165	4.23779	3.43337	5.39254	5.5452	6.01839	3.68913	5.76455	3.96319	2.97079
Iso_D.12889.3	5.93122	5.90027	5.30096	5.18266	4.79637	3.56372	5.22322	4.53678	5.20616	4.52169	4.41381	4.0776	4.64086	5.27677	5.04291	4.08907	2.4345	4.92565	4.41242	3.46856	3.74277	3.00441	4.23761	3.35321	3.60803	2.94953	3.40167	1.82252	4.04681	2.12023	3.62903	3.45413	3.70145	4.57713	3.00413	2.88927	4.01391	3.89043
Iso_D.12914.4	4.3285	4.71992	4.79574	4.93643	3.66374	3.54246	4.59718	4.10698	4.44073	4.69462	3.97405	4.62773	4.27233	4.59256	4.51128	4.10572	3.00554	3.11001	3.23609	4.11443	3.79777	3.21995	2.61631	2.14086	1.01563	1.34083	0.824644	1.44151	3.24978	2.45044	2.53147	1.35745	2.4415	3.13524	-0.0860273	1.08394	1.91244	1.20476
Iso_D.12940.1	0.835867	-0.48666	-0.367951	7.94379	-0.984064	-0.324519	-0.503097	-0.0554792	-0.379332	0.278509	0.513549	-1	0.53983	0.181769	-0.86697	0.725071	-1	-0.368532	-1	-0.560118	-0.680238	-0.60987	-0.0111832	-0.668347	-0.669208	-0.332023	7.02193	6.39145	4.77637	7.71659	6.43601	8.94513	8.18323	9.53559	6.86388	9.29356	6.49439	5.57746
Iso_D.12941.2	1.75866	2.54902	2.63671	5.25707	-0.0547787	0.479708	0.293757	0.878138	1.37735	1.17567	1.02153	0.781319	0.566528	0.39617	0.267128	1.16259	1.19366	0.988453	1.36566	0.901665	1.13747	1.04594	0.558597	1.03257	0.98196	1.30161	0.89191	1.24324	1.32667	1.52967	1.55693	0.922353	1.49666	1.59146	1.21256	0.434795	1.12106	0.920788
Iso_D.12975.1	4.75311	5.53772	-1	5.86832	4.892	4.17096	4.36743	5.25926	5.92452	5.07971	4.81479	4.77646	5.32504	5.42296	5.66278	5.3291	7.13832	4.65426	4.7962	4.35323	5.11875	4.56375	4.8751	4.78205	5.53052	5.55577	5.68551	6.09087	5.70024	5.96653	6.44289	6.78868	6.99033	7.17581	6.50271	7.1369	7.24163	7.74311
Iso_D.12981.1	1.72348	2.35778	3.91588	1.97773	1.42138	2.00754	1.5239	2.02764	2.32692	2.11564	2.69975	1.04606	1.24454	2.10916	2.17742	2.57845	5.5109	1.72615	2.17173	1.24271	1.98842	1.40823	1.66084	2.42574	1.4731	1.40044	2.03668	2.73787	1.89629	3.2651	1.96821	3.3703	5.0522	4.6173	2.76098	3.44824	3.08836	1.71601
Iso_D.12999.2	1.90775	-1	-1	4.76761	-1	0.648179	3.57657	6.33476	5.41548	6.96901	-0.417566	-0.785514	-1	-0.578048	-0.859461	2.35696	4.74587	6.5073	-0.388149	-0.481109	-0.494394	-0.891707	-0.858948	-0.723985	0.899678	4.34314	4.11345	-0.209061	-0.667025	-0.888498	-1	-1	-1	-0.745082	0.126238	-1	-0.982684	-0.91257
Iso_D.13000.2	-1	-1	-1	-1	-1	-0.0507234	-1	-0.77423	-1	-1	-1	-1	-1	-1	-1	-1	-1	-0.0560224	-1	-1	-1	-1	-1	-1	-1	-1	2.19273	3.87375	2.0601	4.80067	3.82201	4.88053	5.4995	5.04643	4.65045	5.3337	3.89263	0.913596
Iso_D.13004.1	2.50967	2.70373	2.17525	2.81591	2.60795	3.40393	2.56989	2.82338	3.65836	2.55967	3.04899	3.28593	3.52273	3.06909	2.44883	1.03536	1.67742	2.30583	1.70675	2.49369	2.49337	2.33061	1.2062	1.40227	0.739497	0.72112	1.49563	1.7331	3.17746	1.86875	2.44209	0.213462	2.52837	2.56286	0.556043	0.280267	2.74778	2.47777
Iso_D.13070.2	3.75245	4.6836	4.7941	1.86582	2.85523	2.75415	3.42283	3.51122	3.74454	3.27344	3.49242	2.67953	2.86232	3.15795	2.69188	3.50224	3.13978	2.75254	3.88874	2.67099	2.83644	3.24283	2.50949	3.25755	3.41035	3.09749	2.78646	3.85119	2.99913	3.40602	3.20359	4.04148	4.35654	4.05056	3.22958	4.38051	4.22885	4.3192
Iso_D.13078.1	6.73159	7.40729	8.57524	7.29149	6.12745	5.88945	6.38377	6.6328	6.88593	8.95017	7.01346	6.92378	7.13048	6.98238	7.14844	7.04755	7.26219	7.22112	6.63119	6.83361	7.05368	6.26128	6.3304	6.70048	6.92646	6.68201	5.96295	6.58219	6.52729	7.14338	7.09497	7.21327	6.7665	6.96691	5.85248	7.53998	6.74815	7.24799
Iso_D.13091.4	4.31075	6.17281	4.90776	5.12586	4.69518	3.34326	4.01264	4.51307	4.68614	3.90059	2.78467	4.02778	4.01586	4.79465	5.01339	5.3848	4.20994	3.80828	3.97336	3.87383	4.36312	3.65235	5.22344	5.01501	3.97906	3.66014	3.49445	3.36301	3.34125	3.10307	3.5624	3.89116	3.76136	3.83924	2.76976	2.09541	3.08328	2.85875
Iso_D.13188.3	4.28666	5.23167	5.70922	4.69574	4.30598	3.32571	4.04571	4.48525	4.52453	3.98831	4.14305	3.93559	3.67621	4.84292	4.7308	4.93583	5.13909	3.83272	3.73972	3.72955	4.17053	4.1627	4.08964	4.58113	4.11997	3.85788	3.6125	4.01326	4.12181	3.94557	3.87546	3.44499	4.252	3.80487	3.51069	3.4245	4.27099	4.32337
Iso_D.13269.1	3.93934	4.4021	4.52137	4.65662	4.46934	3.37524	2.79879	3.18331	4.00574	4.60129	3.34457	3.38478	3.3036	3.75244	2.98746	3.46448	4.13338	3.71528	4.71554	2.81857	3.5536	2.93117	2.83844	3.02713	4.23699	3.37547	2.21923	3.6509	2.99882	3.02082	3.4353	3.82218	3.16523	3.9084	3.18616	2.98192	4.5312	4.1489
Iso_D.13278.1	2.3655	3.30101	4.0043	3.22273	3.82358	2.89454	2.97307	2.32106	2.8697	3.1515	2.95732	2.35692	3.10987	2.74771	3.42268	3.71693	4.0401	2.8385	3.3755	2.50501	2.63254	1.75756	2.31785	2.70024	3.15799	2.81346	2.28223	3.09552	2.89031	3.03457	2.54616	3.40256	3.4662	3.62354	1.85804	3.11434	3.51723	3.72323
Iso_D.13304.2	0.474659	-0.216864	-1	8.5904	6.01359	1.12034	0.58202	6.72305	10.4721	8.86134	8.96899	4.62737	4.4669	-1	3.77812	0.127178	0.245783	7.44078	10.3342	8.4721	2.50303	0.88594	0.85699	0.906325	-0.0546443	2.07435	8.80461	9.74026	10.0846	2.39007	0.635258	-0.177595	-0.0949262	-1	3.38703	1.49612	-0.673705	0.143393
Iso_D.13306.1	-1	-1	-1	-1	-1	-1	-1	-1	-1	-1	-1	-1	-1	-1	-1	-1	-1	-1	-1	-1	-1	-1	-1	-1	-1	-1	-1	1.43166	-1	2.40239	1.0751	3.68465	3.48559	4.01777	2.57496	2.12158	2.17232	1.09359
Iso_D.13307.1	-1	-1	-1	-1	-1	-1	-1	1.25855	0.27173	-1	-1	-1	-1	-1	-1	-1	-1	-1	-1	-1	-1	-1	-1	-1	-1	-1	1.68323	4.52199	3.39429	5.74046	4.41413	5.59117	5.47071	5.17822	3.02737	3.27506	3.25281	1.31734
Iso_D.13318.1	1.97185	2.33278	3.33256	3.96531	4.93725	3.45323	4.50117	4.1171	4.75555	4.28568	4.08139	4.13097	3.9244	4.76045	4.47334	4.8581	4.44506	4.84243	4.70774	4.54844	4.12983	3.99871	3.65651	3.60347	4.2267	3.93988	3.25013	4.10753	4.39865	3.93308	4.01411	4.35934	4.33128	4.00632	3.0313	3.06614	4.19624	4.3234
Iso_D.13320.1	0.427606	1.77227	1.38578	0.439645	1.93672	1.55405	1.88365	1.91022	2.65955	3.14965	3.4123	2.49746	2.0669	1.55561	3.05753	2.80407	4.42063	3.35196	2.12474	3.54185	2.33646	1.09554	1.28604	1.32716	1.26171	1.84271	2.2408	1.66996	1.89634	2.91543	1.76845	2.37121	3.02892	3.16373	1.74353	2.01843	2.43996	1.96558
Iso_D.13404.1	-1	-1	-1	-1	-1	-1	-1	-1	-1	-1	-1	-1	-1	-1	-1	-1	-1	-1	-1	-1	-0.874205	-1	-1	-1	-1	-1	-1	-0.465635	-1	-1	-1	-1	-1	-1	-1	-1	-1	-0.780039
Iso_D.1341.2	2.35373	2.28445	-1	2.84307	1.73082	2.24195	3.35356	2.11406	3.94763	1.95077	2.62248	1.85918	2.12906	2.69812	3.30498	2.36444	4.45525	2.79714	3.16322	2.65331	1.43072	1.79701	2.2479	1.58642	1.29564	1.09491	2.89107	1.36639	3.48512	1.41349	2.02245	1.21597	1.02044	0.822902	0.269839	-0.570298	0.204363	0.341973
Iso_D.13421.1	2.29096	0.507438	2.85004	6.46196	1.56808	1.6943	2.14044	2.13688	2.53931	1.81839	2.16864	1.45025	1.37934	2.86586	2.41329	2.05568	2.28436	0.986099	1.4254	2.27887	1.89935	1.64896	1.22461	1.66767	1.44743	1.0242	1.46353	2.42033	2.26005	1.69016	1.71311	1.78383	2.62612	2.70187	1.6232	0.784889	3.00055	3.04366
Iso_D.13427.2	4.17444	5.62229	4.94515	3.67802	3.54125	3.52608	3.56945	3.95826	3.82089	3.51274	3.44486	3.2604	3.37312	3.48341	2.99818	4.15489	3.4014	3.00919	3.35924	3.42842	3.79077	3.10636	2.69937	3.88945	2.94091	3.06215	3.04998	3.77044	3.73951	3.94756	3.50077	3.77248	4.56282	4.49058	3.73045	3.63326	4.68031	4.69419
Iso_D.13439.1	6.53581	7.2001	6.02058	6.99419	6.84174	5.89897	6.49464	6.85459	6.93716	6.06152	5.84957	6.58902	6.13003	6.87971	7.39089	6.76313	5.9554	5.13585	5.51857	4.85286	6.06482	5.63752	5.45164	5.73094	5.77498	5.7115	5.38617	5.98007	5.3818	5.31266	5.63397	4.72927	7.26643	6.59623	6.41986	5.95574	6.74344	6.45536
Iso_D.13440.3	1.49698	1.25461	1.11468	1.93496	2.66302	1.35059	1.46519	1.69152	2.35801	1.84348	1.5946	1.26398	1.42075	0.578532	1.25651	1.29178	1.57091	2.47588	0.0555547	1.44372	2.38813	1.16807	1.11631	0.0605307	1.3533	0.65158	-0.106318	0.939461	0.915795	0.896744	0.383304	0.869908	1.64043	1.71115	0.710551	1.83162	2.05369	2.024
Iso_D.13448.1	-1	-1	-1	-1	-1	0.218733	0.173466	-1	-1	0.0522916	-1	-1	-1	-1	-1	-1	-1	-1	-1	-1	0.756088	-1	-1	0.976903	-0.335504	-1	4.19296	3.38809	1.76808	4.64095	3.23472	5.42228	5.66117	5.88229	4.08384	5.68287	4.13536	2.92145
Iso_D.1346.1	-1	-1	-1	-1	-1	-0.916538	-0.633839	-1	-1	3.33944	-0.584547	-1	-1	-1	-1	0.16981	-1	-1	-1	-0.32684	-1	-0.857244	-0.396401	-0.481978	-0.797973	-1	3.38427	1.23114	-0.87424	3.15667	1.68056	5.02116	4.60422	4.59357	3.08825	4.17163	3.01247	1.30188
Iso_D.13530.1	-1	-1	-1	-1	-0.8277	-0.263272	-0.247131	-1	-1	-1	-1	0.619064	-1	-0.699126	-1	-1	-1	-1	-1	-1	1.20732	-1	-0.45742	-1	-1	-0.368472	4.31024	5.49853	2.84883	6.71773	5.40079	7.53861	6.79989	6.79774	5.26506	6.81139	5.12519	4.02958
Iso_D.13538.1	3.05018	1.9951	-1	1.96823	1.61578	2.12686	0.593136	1.80323	6.26277	8.40875	6.98545	7.95832	7.76433	6.60209	4.69133	2.60082	2.62766	1.62748	5.58237	6.99921	5.61004	7.24984	6.90491	4.06222	3.85862	2.26062	4.55628	4.86726	7.67297	6.92346	7.8487	5.00333	5.90602	4.93221	3.87968	5.03038	5.29685	4.81606
Iso_D.13540.1	9.47815	9.44245	9.22701	8.30346	6.88469	8.24774	6.35761	6.52517	1.48662	6.77404	7.42612	9.07362	9.1379	9.47376	9.6444	9.09643	8.72454	5.74593	6.8806	7.4896	9.35881	8.91693	9.96352	9.16258	9.68142	7.53979	5.42316	0.527027	6.34329	6.48203	7.88417	7.91852	9.19909	9.10941	9.1787	9.07924	8.85202	8.99256
Iso_D.13571.1	-1	-1	-1	0.238816	0.005988	-0.459464	-1	-1	-0.0747486	-0.509434	-0.775225	-0.865572	-1	-0.46764	0.175052	-0.498614	0.108387	-0.732749	-1	-1	-1	-0.854163	-1	-1	-0.682308	-0.700956	-0.442661	-1	-0.718386	-1	-0.688138	-0.356484	-1	-1	-0.792847	-0.575975	-0.823319	-0.867568
Iso_D.13573.6	-1	-1	-1	-1	-1	-0.605569	-1	-1	-1	-1	-1	-1	-1	-1	-0.87288	-1	-1	-1	-1	-1	-1	-0.695881	-1	-1	-0.683064	-0.0513421	3.48079	3.23476	2.4434	3.78974	3.56204	4.67814	3.86835	4.6352	2.22285	2.42129	1.70914	-0.0152899
Iso_D.13591.1	2.18567	3.25222	4.99569	3.54735	2.60885	2.15523	1.97149	2.53676	3.12019	4.61027	2.98983	3.06285	2.70299	1.92071	3.61796	2.84299	3.19478	2.92467	3.83889	3.59306	2.63279	2.05738	2.301	2.33758	2.28607	2.67118	2.29417	2.19389	2.60271	2.41284	2.07836	2.91345	2.3479	3.5011	1.47506	4.8967	2.31802	2.88774
Iso_D.13604.2	0.371248	-1	3.55685	-1	-0.599231	0.245412	0.312407	-0.0535216	0.839146	0.218704	0.0244052	0.146453	0.567054	0.231581	0.669483	-1	0.458079	-0.555056	-0.501855	-0.068511	0.372228	-0.578895	-0.375971	-0.144013	-0.591921	-0.401511	-1	-0.61292	-1	-0.619627	-0.733575	-0.76654	-0.349916	-0.74318	-0.480055	-0.285981	-0.856438	-0.582678
Iso_D.13671.1	3.39506	-1	3.2169	-1	1.63626	-0.14792	0.967119	1.56962	2.63665	1.57012	-1	1.89808	2.64914	2.15499	-0.371076	1.40645	0.525805	0.719957	-1	-1	0.270424	-0.288868	0.155525	0.0518711	0.36546	-0.329831	-1	-1	0.0616013	-1	-0.358229	0.942679	0.816536	1.20248	0.957878	1.0509	1.51588	1.41844
Iso_D.13672.1	1.59559	-0.0700987	2.49876	1.05903	2.02369	1.16954	1.24822	1.64066	2.47431	1.52866	0.200267	2.39426	3.10509	2.1564	0.84175	0.970445	2.34191	2.7912	-0.446649	-0.249263	0.0824885	0.937903	2.3447	0.842692	1.92542	2.33562	0.952333	0.389694	1.3066	0.986733	1.27334	1.6393	1.55467	3.1725	1.90726	2.06235	2.90774	2.20621
Iso_D.13698.3	3.69194	4.23873	4.15424	2.98995	2.17695	2.73257	3.2219	2.97727	2.59435	7.59771	3.78832	2.41537	3.16041	3.61812	7.31381	4.08686	5.06468	3.77278	4.11131	3.05755	3.27984	2.1354	3.24441	3.55721	4.01399	3.39929	3.51447	4.25909	3.81889	4.51351	3.63896	5.46109	5.16851	5.64566	5.28642	6.77206	4.66653	5.09691
Iso_D.13720.1	1.65686	1.81413	-1	-1	1.12825	1.26357	0.754404	0.807304	1.11787	1.00574	0.0550776	1.86759	1.08498	1.53121	0.742051	1.17018	0.49611	0.0263369	0.437312	1.0288	1.11486	1.04556	0.339776	0.430277	0.236911	-0.281078	-0.280297	-0.40024	0.644678	0.142173	0.121483	-0.339609	0.323439	-0.132414	-0.617449	-1	-0.354997	-0.0979379
Iso_D.13779.3	3.52071	4.01263	-1	2.18995	4.17748	3.4244	3.72079	4.91499	4.93801	4.94731	5.36321	3.5724	2.73574	3.5902	6.18651	3.87721	3.27089	4.22994	3.12592	4.54118	4.13006	4.49148	3.26382	3.53617	4.32948	4.10719	4.37498	5.61763	5.40339	5.22597	5.46104	4.58744	6.08674	5.75319	4.3835	4.22562	6.00513	5.70485
Iso_D.13781.1	5.44705	4.48274	4.53417	4.13765	4.22743	3.81842	4.59543	4.03652	4.60028	4.68993	4.2328	4.7668	4.58046	4.85341	4.02351	4.85163	4.54473	4.4689	4.08444	4.496	4.80397	4.32332	4.1463	4.02408	4.29843	4.54059	4.30028	4.51582	4.20003	3.93834	3.87459	4.20551	4.98866	4.97139	5.29191	3.10586	5.01107	4.77909
Iso_D.13847.1	2.38243	2.50196	2.60877	6.64765	2.95635	2.90104	3.29345	3.8545	4.26378	3.7801	3.43544	2.95823	2.34639	3.47567	1.50614	2.99726	3.42332	3.33251	3.28555	3.1326	2.8586	2.57188	2.41598	2.77883	3.71822	3.62942	3.31275	4.10167	3.57959	3.07188	3.2445	3.26474	3.70919	3.69498	3.24398	2.94512	4.02707	3.861
Iso_D.13895.11	5.1079	5.20217	6.37222	5.53522	5.60075	5.04938	5.08314	5.2569	5.27463	5.35187	4.67354	4.60586	4.87471	5.1128	6.31591	5.70357	5.29022	4.87495	4.82179	4.99983	5.11287	4.37875	3.91829	4.74176	4.66515	4.46675	4.09809	4.65845	4.46564	4.88075	4.31559	4.64197	4.89293	4.73102	4.36955	4.15574	5.3549	5.44329
Iso_D.13935.1	5.35946	4.75788	6.23976	5.82993	5.59496	5.91786	6.13787	6.41071	6.50599	6.25189	5.49835	5.67004	5.43051	6.50502	5.74413	5.63884	5.71951	6.42947	6.30124	5.74955	5.43373	5.54189	5.74263	5.83382	5.86003	5.96766	5.71182	6.18243	6.27991	5.73234	5.85362	5.55311	6.04435	5.84628	6.14099	5.09521	6.01449	5.76412
Iso_D.13976.1	2.27455	3.52353	2.98339	2.05391	2.47785	2.24354	2.72305	2.84422	3.3258	3.03713	1.32336	1.64816	1.78809	2.68475	1.5665	1.64117	1.52678	2.26744	1.4105	1.63121	1.93698	1.92088	1.28453	1.23373	1.55974	1.27668	1.71199	2.18783	2.22142	1.32783	1.58212	0.880931	2.60472	2.81607	1.28965	1.31976	2.16331	1.81838
Iso_D.14012.4	3.09499	5.32043	5.2214	2.0429	3.17893	3.22689	2.5142	3.45663	3.36433	3.77098	2.4692	2.47163	3.62458	4.11256	4.84042	4.15327	3.88558	3.44781	1.8546	3.13939	4.14874	2.88283	4.32478	4.73255	4.24077	3.86939	3.16629	5.01716	4.12997	5.25106	4.46771	5.38542	5.00188	4.55345	3.88836	5.18981	5.31922	5.41168
Iso_D.14021.1	-0.394409	-1	-1	-1	-1	-0.462596	-0.0662676	-1	-0.718422	-0.56651	-1	-0.627952	-1	-0.343181	-0.477902	-1	-0.327455	-1	-0.887201	-0.798397	-0.864802	-0.922555	-0.205583	-0.446058	-1	-0.477012	-0.192716	0.121973	-0.0193909	0.640008	0.347559	0.607637	0.891249	1.42103	0.278474	1.90246	1.20616	1.04461
Iso_D.14024.1	-1	-1	-1	-1	-1	1.80271	-1	1.07343	-1	-1	-1	-1	0.752275	-1	0.345965	0.574923	-1	-1	-1	0.494232	-0.200224	-0.422061	0.561538	0.750732	-0.398778	0.697873	0.789689	1.10243	0.524316	1.61179	0.751019	1.32561	2.62492	2.26904	2.27375	1.44277	2.54624	2.39464
Iso_D.1405.9	1.78343	1.24927	-1	1.108	-1	1.32815	0.785377	0.827485	0.767583	0.99316	-0.0486143	0.768538	0.571097	0.680916	-1	1.44775	0.6145	0.333925	-0.289876	0.655548	0.99573	-0.669897	-0.536071	-0.0226094	0.112954	-0.418889	-0.0664168	-1	-0.124136	-1	-1	-0.0706604	-1	-1	-1	-1	-0.415363	-1
Iso_D.14050.1	1.2602	1.0493	2.39553	1.49852	-0.649632	0.190903	1.20883	0.565008	0.600095	0.578193	0.175017	0.272809	1.7774	1.18335	0.322156	1.36452	1.24991	0.516652	1.83145	0.458683	1.99612	0.887998	-0.50766	1.31515	1.0226	1.9838	0.90741	3.46654	2.96563	3.18931	3.23052	3.20741	3.49608	3.82392	2.51929	1.98601	3.82743	3.36805
Iso_D.14121.1	-1	-1	2.22724	-1	-1	-1	-0.0284215	-1	-1	-1	0.909427	-1	-1	-1	0.374612	-1	-1	-1	-1	-0.444106	-0.0872151	-0.550154	-1	-1	-0.0129241	0.747526	-0.789251	0.102635	-1	-0.0773873	-0.734258	-0.711793	-1	-1	-1	0.116023	-0.74734	-1
Iso_D.14127.1	0.341833	0.623416	1.91169	0.0121481	0.094558	-0.504644	-0.324585	-0.101978	-0.0759355	0.664671	-0.00234622	-0.339652	0.425606	-0.845145	-0.494255	0.482285	1.12275	0.406602	0.619151	0.326236	-0.0161614	-0.210789	-0.00705717	0.105789	0.321433	-0.053751	0.684746	-0.683698	-0.764499	-0.786627	-0.509388	-1	-0.177891	-0.582844	-0.396005	-0.532049	-0.454699	-0.852318
Iso_D.14131.1	2.49403	1.78792	0.0627775	-0.214083	1.27009	0.487469	1.89383	1.69044	2.02768	1.82605	1.37908	0.915154	0.997874	1.22168	0.651501	1.51949	1.9717	1.71924	1.79119	0.870134	0.871002	1.34059	0.565871	1.00415	0.982679	0.915235	1.14549	0.850061	1.13545	0.453854	0.766619	0.285199	1.18079	1.78004	1.3809	0.669779	2.22191	2.04287
Iso_D.14135.12	1.28602	1.37092	2.20902	0.865296	0.754939	0.0216762	0.609947	0.826996	0.939171	0.927249	0.280969	-0.323602	0.348761	0.0719571	0.539232	0.170504	0.189485	1.22284	0.142077	-0.438523	0.320588	-0.0685107	-0.35735	-0.410612	-0.78388	-0.701644	0.302583	-0.384813	-0.655609	-0.556106	-0.885391	-1	-0.599244	-0.569997	-0.798329	0.499723	-0.0435063	-0.351408
Iso_D.14142.3	0.152567	0.579405	1.43376	1.13721	-0.244297	-0.208562	-0.287133	-0.0496929	0.176287	0.839313	0.423174	0.318147	0.913947	0.935891	2.33294	1.36657	0.786778	0.101752	-0.915791	0.0632183	0.794815	-0.423765	0.635049	0.77511	0.394228	0.0563456	1.0862	2.19076	0.748513	2.49831	2.19055	3.39573	4.54325	4.11004	3.71203	4.03325	2.93495	0.853974
Iso_D.14143.2	4.73339	4.15677	4.04742	3.85606	4.11357	4.17614	4.81423	4.59343	4.81379	4.41418	4.64602	4.76381	4.52515	4.88535	4.49524	4.34057	4.97948	3.99944	4.11739	3.84174	3.81353	3.65002	4.38966	4.16957	3.942	3.14461	2.86437	3.562	3.60651	3.02872	3.51769	3.13568	3.85456	3.21518	4.39687	2.741	4.14935	3.81733
Iso_D.14185.1	-1	-1	-1	-1	-1	-1	-1	-1	-1	-1	-1	-1	-1	-1	-1	-1	-1	-1	-1	-1	-1	-1	-1	-1	-1	-1	-0.911622	0.0546462	-1	0.512406	0.428975	0.890046	2.10688	1.54992	1.1754	-1	0.388451	-0.0798145
Iso_D.14276.1	-1	-1	-1	-1	-1	-0.593899	-1	0.197989	-1	-1	-1	-1	-1	-1	-1	-1	-1	-1	-1	-1	-1	-1	-0.206366	-1	-1	-1	-1	-1	-1	-1	-0.623034	-0.15133	-0.499503	-1	-1	-1	-1	-1
Iso_D.14327.2	-1	-1	-1	-1	-1	-1	-1	0.0942363	4.22381	5.49613	-1	-1	-1	-1	-1	-1	-0.597988	-0.390933	-1	-1	-0.825666	-1	-1	-1	-1	-0.85891	3.59568	0.1182	-1	-1	-1	-1	-1	-1	-1	-1	-1	-1
Iso_D.14374.1	3.6398	3.35805	3.97292	4.5658	5.08323	3.75299	4.40735	3.54768	4.22395	3.47834	3.25806	3.55548	3.69396	3.72746	3.67675	3.77807	3.32436	3.7071	2.65658	3.42994	3.21458	1.89135	3.39134	4.32598	3.37581	2.37791	2.43742	1.48363	3.5296	2.91868	3.2052	3.4636	2.59794	1.38824	0.95996	1.34582	1.16454	1.877
Iso_D.14389.2	5.12757	6.38537	6.95133	5.73374	4.79692	4.2999	4.63699	5.08836	4.97729	6.2513	4.93126	4.65841	5.47171	5.09882	6.33318	6.13628	7.25625	5.89639	5.1563	5.13222	5.77087	4.7122	5.36303	5.66075	5.85474	5.46811	4.62646	5.09374	4.48671	5.30731	4.83856	6.1891	5.22202	5.62736	5.03173	6.39933	5.6883	5.97415
Iso_D.144.1	4.57614	4.14808	3.22973	4.20097	1.45366	2.87998	3.2973	3.37438	3.72534	2.41612	1.03091	2.86643	2.75884	3.2958	2.25481	4.18318	3.17252	1.65584	2.06829	2.6202	2.80734	1.9238	2.18334	3.43053	2.42227	1.69687	2.87304	1.37862	1.84288	1.81344	0.990387	1.8001	2.09624	5.85403	-1	1.59632	0.79463	1.05641
Iso_D.14461.1	3.16257	4.27404	4.36268	4.42784	3.39658	2.69251	3.17711	3.0236	3.84325	3.70999	3.32243	2.99945	2.94342	3.34674	3.39623	3.92953	5.7371	3.56215	3.98761	3.21438	3.52677	3.04955	3.28424	3.31525	4.03188	3.59601	2.11885	3.93528	3.60259	3.9184	3.58638	4.18346	4.0916	3.45356	3.07635	3.61316	4.17488	4.27433
Iso_D.14480.1	-1	-1	-1	-1	-1	-1	-1	-1	-1	-1	-1	-1	-1	-1	-1	-0.236114	-1	-1	-1	-1	-1	-1	-1	-1	-1	-1	-1	-1	-1	-0.630462	-1	-1	-1	-1	-1	-1	-0.78671	-0.780827
Iso_D.14533.1	0.931161	-1	2.12495	-1	-0.940274	-0.493869	-1	-0.0366377	-1	-0.360862	-1	-0.23389	-0.421474	-0.726884	-0.913701	0.993107	1.16197	0.105992	-0.555692	-0.099578	0.0722637	-0.661057	-0.534657	0.285592	-0.135516	-0.724214	-0.753908	-0.846688	-0.692472	-1	-0.741529	-0.531075	-1	-1	-1	-1	-0.748089	-0.864413
Iso_D.1457.1	2.25418	3.68585	4.41233	3.04113	2.15423	1.2493	1.59933	2.6461	1.96728	4.1539	1.64447	1.86552	2.27258	2.3725	3.7045	3.05571	4.25845	2.65828	2.18847	2.1188	2.45498	1.79404	2.31938	2.55334	2.81026	2.72947	2.28586	2.74273	2.36417	3.06603	2.84689	4.0341	3.01174	3.99421	2.45403	4.77925	3.60292	4.04744
Iso_D.14609.3	4.60499	4.39323	5.35533	4.17685	3.21831	4.18138	5.00428	2.3805	3.47155	4.89889	4.51453	4.11232	3.9622	4.51778	4.73484	4.71547	4.37366	4.60962	4.43968	3.89906	4.30134	4.68445	4.76955	5.37777	5.67854	5.5184	4.05492	4.28997	5.2289	4.40129	4.87064	4.93198	4.71854	4.67212	7.99898	4.77784	4.77332	4.63678
Iso_D.1462.1	-1	-1	-1	-1	-1	0.0402726	-1	-1	-1	-1	-1	-0.664115	0.854078	-1	-1	-1	-1	-1	-1	0.064078	-1	-0.785358	0.228708	-0.485853	0.247084	-1	-1	-1	-0.532912	-1	0.59265	-1	-1	-0.34528	-1	-1	-0.564759	-0.669064
Iso_D.14677.2	0.741312	2.31816	1.42703	1.39384	-0.214265	1.01376	0.249983	0.515812	1.91369	1.90061	2.60765	1.36646	1.32839	1.77053	1.00344	1.53875	1.5153	1.5772	1.13557	1.22334	0.561777	0.950883	0.706887	0.986279	0.339146	0.40546	1.59062	0.741517	0.539161	-0.279172	0.150749	0.586435	0.173727	0.55832	0.0224322	-0.223753	-0.184504	-0.642174
Iso_D.14680.1	4.41169	3.31954	3.85442	2.65355	1.69833	4.69223	2.29518	2.11573	2.69936	3.02503	3.25531	1.95688	3.39391	1.80144	2.15264	0.862156	0.144758	1.59468	1.3	0.421454	2.17538	0.698843	1.03251	0.622383	0.498111	-0.556077	-1	-0.247317	0.582725	1.49083	0.149317	0.114243	0.385335	0.860418	-0.41509	0.667766	-0.379782	-0.104243
Iso_D.14744.1	-1	0.722535	0.6473	-1	0.197829	-0.0254485	0.311107	0.671641	0.828561	0.179422	0.338382	0.488496	0.713026	1.04281	-0.174566	1.03995	0.616036	0.961428	1.30577	2.00746	1.14169	-0.0412373	-0.227458	0.0720974	-0.185541	0.0258651	0.26041	0.686284	-0.00526076	-0.806381	-0.451992	0.115748	-0.090589	-0.0782294	-1	-1	-0.460237	-0.472313
Iso_D.14758.1	-1	1.74356	-1	0.420603	-1	-0.422096	0.583013	-0.481853	0.451581	0.713997	-1	-0.58355	-1	-1	-1	-0.418642	0.171571	-0.434847	-1	-1	-1	-1	-0.0865919	-0.630844	0.312477	0.0191108	-1	-1	-0.338848	-1	-1	2.59813	-1	-1	-1	-1	-0.18407	-1
Iso_D.14875.1	0.0672731	-1	3.32016	1.5883	-0.129362	0.324533	0.879927	0.774893	0.698951	-1	2.31692	-0.151688	0.96479	0.699274	1.99237	1.72418	1.18301	0.461782	0.88768	-0.188862	0.647702	0.647977	0.337272	1.07425	0.265187	-0.339186	0.366464	0.212701	0.209516	-0.430691	-0.0483357	-0.483753	0.406401	0.0187795	-1	-0.120691	-0.588886	-0.214295
Iso_D.14899.1	-1	-1	-1	-1	-1	-1	-0.565821	-1	-1	-1	-1	-1	-1	-1	-1	-1	-1	-1	-1	-1	-1	-1	-1	-1	0.0615762	0.85875	0.259489	-0.245235	0.197866	0.0629992	1.76089	2.20274	3.42687	4.27091	3.39835	1.63874	5.61015	5.968
Iso_D.14978.2	1.25438	1.18755	-0.125773	2.13957	-0.120573	1.99992	0.900413	0.849323	1.60916	1.59102	2.76052	2.12114	2.22053	2.21099	1.4888	0.825659	1.77374	1.71068	1.28034	2.44548	0.22696	0.0395518	0.735596	1.1146	0.607975	0.562092	0.820343	0.151441	1.65364	0.158437	0.383799	0.245905	1.00782	0.361107	-1	-1	0.096207	-1
Iso_D.14998.1	-1	-1	-1	-1	-1	-1	1.25018	-0.198564	-1	0.0620671	-1	-0.689408	-1	-0.652722	-1	-1	-0.0726246	-0.552377	-0.239354	0.164019	-1	-0.356951	-0.393981	-0.723183	-1	-1	-1	-0.636213	0.420835	0.0249906	-0.313568	-1	-1	-1	-1	-0.0680968	-0.308275	-1
Iso_D.15015.1	3.24178	3.92694	3.05462	2.58983	2.59341	0.73359	0.889272	0.851205	1.75888	1.933	2.4056	1.6031	2.00096	2.52654	2.42675	2.36615	1.36875	1.35689	1.02558	1.32101	1.18647	0.980169	0.973022	0.795209	0.798757	0.194568	0.943336	0.828907	1.87455	0.3207	0.846114	0.722456	0.678796	0.657379	0.821102	1.48896	0.0630579	0.249152
Iso_D.15092.1	-1	-1	2.73957	-1	-1	-1	-0.198189	-1	-1	-0.419932	-1	0.0569983	1.23041	0.521815	1.33505	-1	-1	-0.647231	-0.874895	-0.456768	-1	-0.484441	-0.67683	-1	-0.479702	-0.433891	0.832251	-0.290198	-0.813698	-0.170527	-1	-1	-1	-0.665404	-1	-1	-0.44777	-0.764362
Iso_D.15218.2	3.15272	3.1446	2.11424	2.10197	2.11503	1.327	2.1144	2.37236	3.61397	2.44955	1.65825	1.52073	2.51256	2.5508	2.52306	2.94988	3.00946	1.80659	2.54322	1.96054	1.75297	1.04677	2.28651	2.0943	1.76719	1.80455	1.50115	1.64896	1.5025	0.912326	0.843707	1.10001	1.56599	2.13733	0.98418	1.09295	1.00851	1.28594
Iso_D.15219.1	-1	3.42108	-1	-1	-1	-1	-1	-1	-1	-1	-1	-1	-1	0.567765	-1	-1	-1	-1	-1	-1	-1	-1	-1	-1	-1	-1	-1	-0.445156	-1	-1	-1	-1	-1	-1	-1	-1	-1	-1
Iso_D.15341.1	-1	-1	-1	-1	-0.804962	-1	-1	2.05804	-1	-1	-1	-1	-1	-1	0.405709	-1	-1	-1	-1	-1	-1	0.323842	-1	1.94092	-1	-1	0.678912	-1	-1	-1	-1	1.57602	-1	-1	-1	-1	-1	-1
Iso_D.15350.1	0.619056	-0.307996	1.53784	0.0591952	0.378379	-0.564394	-0.755662	-0.469318	0.960164	0.195017	-0.227122	3.15982	2.4004	-0.0150876	-0.330292	-0.321144	-0.489943	0.887295	-1	-0.239508	0.356248	0.0167902	-0.205575	-0.0977463	-0.511565	-1	-1	-0.879187	-0.94106	0.0810006	0.36605	-0.838764	-0.266287	0.129414	-0.832786	-1	-0.626168	-0.475289
Iso_D.15546.1	1.86135	1.87786	-1	0.788041	1.50502	2.28659	1.49395	2.10179	2.45862	1.46922	1.46964	2.10171	2.55762	3.02834	2.44774	1.84249	3.58516	1.50591	1.5263	3.07554	1.92014	1.16603	1.67847	1.55328	1.00927	0.709963	1.12986	1.35808	2.43503	1.50425	2.31073	1.68788	2.11441	1.63772	1.95532	1.70851	1.35806	1.60069
Iso_D.1571.4	-1	-1	-1	-1	3.54513	1.06664	1.87366	2.77238	2.46437	2.75777	3.11087	2.68718	2.02922	2.56493	0.753641	2.94728	1.66478	1.90666	1.41715	1.39106	1.80047	2.52919	1.38944	2.2486	1.72185	1.14253	2.85024	0.924833	1.80613	-1	1.56083	-1	-1	-1	-1	2.0236	0.981623	0.532787
Iso_D.1590.1	3.66639	4.76419	4.01672	4.54893	2.82131	3.28975	3.41943	2.75612	2.48387	1.6792	2.59452	2.94617	3.45289	4.02361	3.71675	4.03828	3.95064	2.30984	1.22668	1.82364	3.05587	2.21562	2.49064	3.14005	2.67892	1.66751	1.14924	0.274131	2.02466	1.70021	1.34867	0.870027	1.27007	1.90805	0.834184	0.667312	0.248605	0.930632
Iso_D.1686.1	1.3068	4.54304	-1	-1	-1	0.100529	-1	-1	3.41621	0.799423	0.34613	2.20055	1.39473	2.30357	-1	-1	-1	0.352011	-0.571494	0.0530154	0.140879	-1	-0.0789088	-0.293608	-1	-1	2.55795	-0.486566	-0.294434	0.35101	-0.580506	2.08858	1.50768	-0.0951234	-1	0.901246	-0.797973	0.230913
Iso_D.1709.2	0.321699	-0.0374287	-1	-1	-1	-0.075694	-0.0838581	2.43224	4.57529	3.61	-1	-0.183499	-1	-0.542924	-0.897289	0.940899	0.807161	2.85717	-1	-1	0.558284	-0.800078	-0.502271	-0.225942	-0.730578	-0.353979	3.90187	0.681995	-0.732149	-0.796288	-1	-1	-0.731553	-1	0.818088	-1	-0.624331	-0.778153
Iso_D.176.5	2.44867	2.10571	1.79939	-0.0864798	-0.835317	0.0803241	1.05712	1.68753	2.02664	-0.422864	0.962214	1.33303	1.06317	1.64485	2.29575	1.95807	3.02067	1.84438	1.13957	2.18171	1.56625	1.47652	2.33399	1.21472	1.95167	0.541612	0.130324	0.428169	1.56585	-0.383305	0.628372	0.655151	0.183705	-0.0890936	0.759083	-0.264272	0.500114	0.65459
Iso_D.1763.1	2.83599	-1	3.12038	0.17159	1.74035	1.17809	0.143385	0.368122	1.99876	7.86516	9.4589	9.33087	8.56743	1.19806	3.97657	0.42368	1.54279	0.706406	4.42692	8.62195	7.29984	6.78655	2.92165	1.36045	0.659038	0.0248212	0.645392	-0.0379445	8.45035	8.2192	4.76363	0.676516	1.24761	0.651429	-1	0.173442	-0.0964173	0.184997
Iso_D.178.1	7.89514	7.52352	6.19147	8.07294	7.86206	7.24379	7.5157	7.83793	8.02141	8.0132	7.10224	7.3841	7.05433	8.30124	6.86985	6.72778	7.41934	7.44885	6.77178	7.44652	7.09118	6.27254	8.29979	6.91971	6.20586	6.15311	6.70369	5.63425	7.80635	6.28554	7.27986	5.58541	5.59722	3.42461	3.58699	2.86134	4.01737	4.43392
Iso_D.179.2	7.45236	6.83595	4.76481	7.48685	7.87347	6.3258	6.82281	6.80562	7.63885	6.88655	5.91676	6.33661	6.06147	7.18411	6.12469	5.26908	7.11284	6.10293	6.13779	6.93424	5.68797	5.03469	6.78695	6.00268	4.66643	4.47072	5.56818	4.38002	6.80406	4.91456	6.17024	4.03245	4.85578	1.77118	2.54437	3.37713	4.08224	3.9216
Iso_D.1919.1	-1	0.638289	-1	-1	-1	-0.238111	0.00208742	-1	0.534791	0.667139	0.264146	-0.397875	0.754699	0.127745	0.389163	1.67969	0.70245	0.539302	0.256104	0.259699	-1	0.451603	0.466691	-0.14723	-0.461547	-1	-1	0.260649	-0.494768	-1	-1	-1	-1	-1	-1	-1	-1	-1
Iso_D.194.2	-1	-1	-1	-1	-1	-1	-1	-1	-1	-1	-1	-1	-1	-1	-1	-0.336697	-0.375891	-1	-0.544291	-1	-1	-0.482785	-0.470211	-0.484019	-1	-0.400142	-0.660237	0.749041	0.1055	0.959679	0.351873	1.69003	1.16876	0.977428	0.338886	1.89351	-0.130447	-0.682481
Iso_D.2014.1	-1	-1	-1	-1	-1	-1	-1	-1	-1	-1	-1	-1	-1	-1	-1	-1	-1	-1	-1	-1	-1	-1	-1	-1	-1	-1	-1	-1	-1	-1	-1	-1	-0.503963	-0.550755	-1	-1	-0.366296	-1
Iso_D.2040.1	3.71008	2.93222	3.06241	3.18299	3.00219	2.42228	3.11485	3.60929	3.91917	3.61599	2.87055	3.30648	3.10413	3.71388	1.82931	2.72573	3.25574	2.37595	2.00475	2.4231	1.88766	2.48125	1.88631	1.68551	1.37694	1.28649	2.97539	2.84131	3.04397	2.16433	2.83057	2.41006	3.28507	3.70359	1.64841	2.59283	3.19633	2.52638
Iso_D.2042.5	4.28226	5.00976	4.96756	5.30302	4.79648	3.38213	4.15559	4.50608	4.70697	4.70554	4.40561	4.32802	4.08188	4.96501	4.41693	5.0633	4.79472	4.26757	4.63015	4.31619	4.53992	4.08728	4.16777	4.15059	4.8493	4.32744	3.84357	5.11043	4.8163	4.74612	4.78248	4.85686	5.29556	4.82095	4.85742	5.08736	5.42913	5.42813
Iso_D.2066.1	5.1071	5.58456	6.09554	4.93483	4.50003	4.48088	5.04131	4.64785	5.76615	5.46525	5.4888	4.20646	3.44845	4.83809	6.82736	5.06954	6.44438	4.70587	4.92155	4.58556	3.4316	4.32201	4.17228	4.74021	4.22707	4.93272	4.25041	5.51981	5.48698	5.02471	4.86795	5.90947	4.91864	4.73988	5.13967	3.09109	5.21223	5.17479
Iso_D.223.8	1.52851	2.29498	2.3523	2.59501	2.14207	3.04973	2.83981	3.70237	4.4418	6.45558	2.94451	3.18849	3.13076	3.12902	4.00543	2.49944	2.49549	2.45874	1.95629	3.37776	2.09499	2.12471	2.69515	1.99472	0.784201	1.37014	2.19876	1.64301	3.74597	1.83697	2.43567	-0.152295	0.728376	0.229163	-0.155082	0.018459	0.515267	0.984817
Iso_D.224.1	-1	-1	-1	-1	-0.147216	-1	-1	-1	0.332099	-0.427344	-1	-0.326078	0.811965	-1	-1	-0.209916	-1	-0.0420471	-1	-0.591354	-0.391266	-0.629481	0.0172836	-0.866985	-1	-1	-0.297577	-0.799132	1.15368	0.483942	0.459937	-0.561133	-0.640652	0.0120293	-0.754142	-0.503774	-0.158102	-0.48957
Iso_D.2294.2	-1	-1	-1	-1	-1	-1	-1	-1	-1	-1	-1	-1	-1	-1	-1	-1	-1	1.50736	-1	-0.193368	-0.635877	-1	-0.429927	-1	-0.0303727	-1	1.07268	-1	-1	1.55328	0.139658	1.0448	1.09254	1.88966	0.926177	0.900721	0.489587	-0.451594
Iso_D.2416.1	0.560166	-1	-1	3.55979	1.22111	2.09224	2.2377	3.06424	1.35349	2.47104	1.36576	2.28116	3.97142	2.54935	2.28496	2.43823	3.82338	1.85278	-1	0.879869	1.47441	2.06915	2.80729	2.1623	2.50286	1.93722	0.580483	0.40361	2.24122	0.901436	2.46415	1.11732	1.55489	-1	-0.360079	-1	0.371089	0.136437
Iso_D.2454.2	9.43386	10.0082	10.6332	10.1318	10.8386	9.79663	10.2753	10.4383	10.4488	10.7153	10.796	10.1718	10.5782	10.5668	10.3098	9.98783	11.0851	10.6912	10.549	10.9839	10.7148	9.90337	9.98987	10.5036	11.1312	11.2567	10.7168	10.773	10.0803	10.3764	10.4188	10.2445	10.6027	10.2829	11.1542	11.0643	10.784	11.2051
Iso_D.2499.1	8.95832	9.5843	10.0426	10.1446	9.2788	9.0985	9.84073	9.91297	10.0094	10.1402	10.2387	9.67501	10.1466	9.97029	9.9947	9.34711	9.95193	10.0571	9.76005	10.4456	10.1785	9.37711	9.4447	9.88481	10.6759	10.6454	9.88345	10.2145	9.44206	9.83591	9.78418	9.69093	9.92072	9.5329	10.1629	9.97981	10.196	10.4565
Iso_D.2531.1	1.27164	1.50335	2.89473	2.66191	1.21726	2.55919	2.1486	2.3979	2.44308	2.98116	1.99229	1.62416	1.76632	2.08885	3.6027	1.71782	2.07313	1.83675	0.868568	1.08151	1.62118	1.20636	1.67931	1.83457	1.53457	0.946389	1.41699	0.272303	2.18946	0.493506	0.8951	0.024372	0.832963	0.35806	0.118675	1.64456	0.69687	0.146464
Iso_D.2538.1	0.88768	-1	-1	1.58857	1.00238	0.538884	0.144562	1.23709	1.07161	1.20412	0.857834	0.384126	0.152185	1.83506	0.159315	0.701402	0.857545	1.17797	1.22225	1.42998	0.662432	-0.0138902	0.155573	0.243905	0.155112	-1	0.409471	0.280715	0.104391	0.156022	0.167687	-0.278047	-0.210188	-1	-1	0.174878	-0.166277	-0.349458
Iso_D.2539.1	3.33175	-1	-1	1.61324	3.16519	1.8348	0.599548	1.42151	1.09113	1.49743	1.987	1.34109	1.30855	3.16085	0.91259	0.0519301	1.66817	0.498127	1.18394	0.298532	1.59684	1.16324	2.25411	0.784411	-0.0506699	-1	0.964648	0.0943871	3.48767	1.28196	2.31462	-0.587158	0.619936	-0.249842	-1	-1	0.14651	-0.587006
Iso_D.2628.1	1.83078	1.67955	1.60096	2.28582	2.02252	1.79498	1.9487	2.06308	2.37189	6.26608	2.05622	2.00133	1.15967	2.59786	2.40695	3.06208	2.55182	2.35618	2.46051	1.68497	2.0749	2.20344	1.44782	2.08008	1.7789	1.79263	1.56925	2.21913	1.98088	2.27902	1.95181	2.49854	2.93415	3.53612	1.93926	3.20963	2.8744	3.17602
Iso_D.2634.2	-1	-1	-1	-1	1.65283	-0.576865	0.794946	1.69306	-1	-1	-1	0.203748	-0.465678	0.80521	2.62874	1.36587	1.08281	-0.194471	0.371982	1.28523	0.77381	0.192524	0.847642	1.3794	0.769541	0.741058	0.674408	-0.35619	0.192316	-0.668987	0.357179	-0.359653	1.34769	0.414681	0.944146	0.474844	1.07368	1.04219
Iso_D.2636.1	3.02855	3.46655	4.14157	4.60485	3.96492	2.4817	3.0309	3.04584	3.35199	5.72734	2.72086	2.83503	3.24695	3.26078	4.09983	3.68531	5.19246	4.14485	3.67031	3.40138	3.6022	3.02597	2.8319	3.33257	3.53184	3.42818	2.9459	3.17538	3.17144	3.30062	3.42808	3.69522	3.83283	4.31285	2.81581	4.87846	3.67319	4.2987
Iso_D.2656.5	2.64585	-1	-1	2.96295	1.22667	0.484247	1.30395	-1	0.126944	2.46158	-1	0.193701	-1	0.487031	0.170466	-1	-1	-1	-1	-0.00868238	1.4701	1.09783	-1	0.196238	-0.0804735	-1	-1	-1	-1	-1	-1	-1	0.480421	-1	-1	-1	-0.735438	-0.0516805
Iso_D.2657.1	-1	-1	-1	-1	-1	-1	-1	-0.309455	-1	-1	-1	-1	-1	-1	-1	-1	-1	-1	-1	-1	-1	-0.868624	-1	-1	-1	-1	-1	-1	-1	-0.804885	-1	-1	-1	-1	-1	-1	-1	-1
Iso_D.2685.1	-1	-1	-1	-1	0.288394	-0.122781	0.71596	-0.467464	0.000627544	-0.477859	-1	0.423149	0.0759084	0.762295	-0.826668	0.456023	-1	-1	-1	-1	-1	-0.315045	-1	-1	-0.20865	-0.685226	-1	-0.207613	-0.456653	-1	-0.401588	-1	-0.248089	-0.0701427	-0.585546	-1	-0.236771	-0.523369
Iso_D.2685.2	1.87076	-1	3.80744	1.62886	0.975273	0.984531	2.71856	1.73	1.06843	0.824844	1.82303	1.60538	0.467411	1.91633	0.142679	1.71712	1.70026	1.3796	0.992356	1.61865	1.60384	1.311	0.848706	0.774476	0.927713	0.968495	0.78868	2.10566	1.55592	1.49891	1.58603	1.21314	1.58871	2.29667	1.5639	1.29271	2.1366	2.22315
Iso_D.2844.1	-1	-1	-1	-1	-1	-1	-0.291905	-0.231523	-1	-1	-1	-1	-1	-1	-1	-1	-1	-0.10336	-0.664671	-0.508074	-1	-0.762997	-1	-1	-1	-1	-1	-1	-1	-1	-1	-1	-1	-1	-1	-1	-1	-1
Iso_D.2846.2	1.82322	2.66437	-1	1.05601	-0.146041	0.00471477	0.896757	1.6201	0.880772	1.52019	0.116348	-0.0980237	1.10151	-0.445692	0.504342	-1	-0.0140164	0.842466	1.15068	1.4734	1.21677	0.0818112	0.423072	0.337919	0.198892	-0.180376	0.452802	-1	-0.111229	-1	-1	-0.678753	0.529405	0.2651	-1	-1	-0.526236	-0.710261
Iso_D.2907.1	-1	-1	2.50889	-1	-0.982608	-0.702475	-1	-1	-1	-1	-1	-1	-1	-1	4.74261	-1	-1	-0.418666	-1	-1	-1	-0.656988	-1	-1	-1	-1	4.71431	2.91509	1.82453	4.69562	2.84891	5.73488	4.77169	5.65801	3.67339	4.88025	3.31754	2.34882
Iso_D.2916.1	3.92336	4.48413	4.81619	5.16955	4.87074	4.05064	4.70361	5.23622	5.31085	4.67975	4.35738	3.81495	5.20235	4.67413	5.23684	5.16746	5.44343	5.547	4.37866	4.86629	5.19399	4.45778	4.54906	5.37796	5.50509	5.35622	5.2713	5.1109	4.22474	3.93006	4.93648	5.12661	5.52972	4.98906	5.25134	5.41229	5.60611	5.71872
Iso_D.2941.1	3.44869	3.74527	5.36148	3.86566	3.42635	2.97537	3.39525	3.912	3.61461	6.9425	3.25183	2.82863	3.16717	3.42668	4.68035	3.55621	5.57121	3.80473	3.71045	2.94916	3.09474	3.18368	3.44867	3.57922	4.12145	3.91994	3.75612	4.44605	4.00696	4.54012	4.34634	5.5973	4.37146	5.14491	5.05412	6.44924	5.01108	5.69892
Iso_D.3013.1	2.07986	1.21702	2.25156	2.96025	2.13384	1.66657	2.44391	2.83997	2.87649	2.82807	2.89328	3.24343	2.37328	2.35273	3.74412	1.54135	1.78182	1.49683	1.67316	1.84067	2.03882	2.54552	1.46396	1.49395	0.829229	0.377843	0.938799	1.48628	1.61456	1.26577	1.40868	0.936828	2.53653	2.81206	3.19197	1.39204	2.92943	2.24522
Iso_D.3026.1	-1	-1	-1	1.3088	-1	-1	-1	1.89685	-1	-1	-1	-1	1.39268	-1	-1	-1	-1	0.127531	-1	1.02073	-1	-1	-1	-1	0.972946	-1	-1	-1	-1	0.722983	0.604409	-1	-1	0.600803	-1	-1	-1	-1
Iso_D.3074.1	-1	1.77278	-1	-1	-0.899707	0.38105	-1	0.776671	6.04625	7.54587	5.13929	0.903074	2.0393	-1	-0.344505	0.632641	0.448217	0.540753	6.73311	4.19458	0.618703	-0.309553	0.329	1.78876	1.45976	1.65194	4.41399	6.30484	6.74869	1.7654	0.505942	0.757843	1.10271	0.56547	-1	-1	0.257788	-0.319996
Iso_D.3077.1	-1	-1	-1	-1	-1	-0.466777	-1	-0.876226	-1	-1	-1	-1	-1	-1	-1	-1	-1	-1	-1	-1	-1	-1	-1	-1	-1	-1	1.11029	1.90795	-0.149899	2.99195	1.54996	3.05942	3.73117	3.16156	2.67022	1.98993	1.96995	0.849406
Iso_D.3144.1	2.53637	2.64706	2.53142	0.0844064	2.08508	1.04346	-0.0211776	1.34452	1.18691	1.60632	2.15046	1.57707	2.22513	1.51546	1.94487	2.09779	1.48221	1.51862	0.703263	1.63587	1.87969	1.30443	0.793909	0.901525	0.610963	0.571224	1.20851	1.85851	1.95309	1.77093	2.05996	2.41653	2.31669	2.75961	0.877877	1.87417	2.7778	2.55366
Iso_D.3171.3	1.86	2.24058	2.75599	1.16476	0.718943	0.590572	1.05635	1.17111	0.984636	1.54537	0.773624	1.24559	1.28357	0.98691	1.64275	0.865223	0.538378	1.21139	0.930063	1.16194	1.39285	1.00445	0.359643	0.213776	0.154741	0.166056	0.156017	0.236946	0.33261	0.830414	0.716309	0.542999	0.431482	1.25226	0.475757	0.947543	0.0347372	0.624583
Iso_D.3197.1	2.35004	2.36958	-1	2.48361	-0.447605	1.89187	2.49178	3.18424	3.20272	2.40083	2.1364	2.82044	3.35524	2.90515	3.48999	3.61329	3.13829	3.13574	2.45795	1.97394	3.25264	2.75269	2.36622	2.16821	2.20195	2.47761	1.73985	0.391475	1.26189	1.48053	1.24678	1.9297	2.52215	2.94184	3.32861	2.59921	4.10072	4.42793
Iso_D.3328.1	-1	-1	-1	-1	-1	-1	-1	1.38388	1.37532	3.3884	-1	-1	-1	2.13605	-1	-1	-1	1.24781	-1	-0.396645	-1	-1	-1	-1	-1	-0.604362	-1	-1	-1	-1	-1	-1	-1	-1	-1	-1	-1	-1
Iso_D.3383.3	1.92343	2.0469	3.23612	2.97684	2.29341	2.26212	2.68338	2.53785	2.19622	2.58687	1.53781	1.8149	2.25284	2.42379	2.33737	2.99046	2.42218	2.63357	0.956668	2.43178	2.16722	1.91557	2.54969	2.63497	2.66934	2.1414	2.42359	2.40952	2.12914	1.78295	2.0684	2.4219	2.79187	3.30493	2.44113	3.63038	2.97563	3.12338
Iso_D.3447.1	-0.37738	-0.408296	2.25099	-1	-0.00707243	0.126612	0.0874249	0.0109158	-0.279395	0.308016	-0.334213	-0.132921	1.11606	-0.607371	0.179974	0.103703	-0.369829	-0.238248	-0.775581	-0.335351	0.508284	-0.575154	-0.383398	-0.612664	-0.779802	-0.7675	0.167088	-0.856399	-0.79682	-0.522369	-0.549802	-1	0.0066834	1.33629	-1	-0.274529	-0.807981	-1
Iso_D.3487.1	3.70149	3.92085	3.64569	4.35539	3.80589	3.85205	4.61388	4.38462	5.26605	4.9792	4.57889	4.22562	4.42757	4.3452	4.16089	4.25828	3.87126	4.28103	3.62071	4.88907	3.8159	2.85264	4.11873	3.17138	2.87038	2.95508	3.58391	2.80625	5.20972	3.06371	3.92801	2.09424	2.00959	0.966113	1.00336	0.85906	0.854732	1.00113
Iso_D.3514.1	-1	-1	-1	-1	-1	0.97513	-1	-1	1.06041	0.691223	-1	-1	-1	-1	0.694978	0.300144	-1	-0.0453138	0.627468	-1	-1	-0.720831	0.922157	-0.637856	-0.313058	-1	-0.90106	2.17561	1.02782	-0.14281	0.240617	-1	0.141281	-1	-0.351349	-1	-0.816956	-1
Iso_D.3626.1	-1	-1	-1	-1	-1	-1	-1	-0.840902	-1	-1	-1	-1	-0.374569	-0.458467	0.0328828	-1	-1	-1	-1	-1	-1	-1	-1	-1	-1	-1	1.74518	2.47983	1.51714	3.37812	2.40147	4.93877	4.32846	3.87682	1.85089	3.36243	2.61758	0.505799
Iso_D.3649.1	3.10532	3.55187	3.27719	3.3659	2.66327	2.71238	2.82274	3.21996	2.9315	2.60431	2.58434	2.88576	2.96821	3.96328	4.24044	3.56213	3.42475	3.3753	2.41363	3.10462	3.3099	2.88061	3.30876	3.81888	3.65207	3.20843	2.63488	3.63653	2.96707	3.03377	3.09731	2.27787	3.49068	3.5514	2.22805	3.66959	3.5254	3.61215
Iso_D.3657.2	3.21155	3.43663	3.18743	2.39671	2.21279	1.497	2.67184	1.85012	2.78153	2.35689	1.98847	2.3265	2.45358	2.62649	2.18407	2.74858	3.02498	2.51868	2.24749	2.52813	2.41676	2.2016	2.14058	2.53416	2.63002	2.15077	2.13697	2.48798	2.00186	2.13533	2.31087	1.81363	3.03494	2.60061	2.39994	2.42284	3.22667	3.19955
Iso_D.3679.2	0.673945	1.91034	0.582794	0.868331	0.648327	1.02594	0.221821	0.818968	1.17931	0.939594	0.787942	1.03327	1.25772	0.480403	1.39061	1.07444	1.54708	1.58552	1.99384	0.835343	1.51494	1.29336	0.723813	0.696346	0.788317	0.556435	1.21092	0.660643	0.297546	0.0792127	0.119253	0.65441	1.32605	1.91437	1.27753	0.872947	1.75083	1.29002
Iso_D.3754.1	5.47136	4.86906	4.15117	5.41982	5.21724	4.91213	5.32645	5.25357	5.82511	5.41724	5.52038	5.08511	5.24005	5.94598	5.12254	5.07904	6.01654	5.03566	5.39503	6.09965	5.11803	4.29771	5.23982	4.68508	4.27802	3.96448	4.31078	3.93148	5.57552	3.89096	4.50356	3.34604	3.48493	1.80281	2.08076	2.04569	2.76162	2.62598
Iso_D.3802.1	4.55098	3.91543	3.34309	5.58712	4.74038	4.44182	4.72693	4.88606	5.25646	4.71153	5.05759	4.78783	4.17575	4.84728	3.92555	3.22393	4.16553	4.69721	4.0926	4.25446	3.91722	2.75042	4.13471	3.06063	2.34657	2.13521	2.71818	1.95294	4.01606	3.32429	3.38864	2.24328	2.70076	0.845211	-0.477875	0.547981	0.402907	0.919773
Iso_D.3822.1	2.49576	4.87611	5.55323	3.41877	3.83938	2.77656	3.42541	3.87612	3.65187	3.09634	3.64502	2.11956	3.0909	3.91581	3.73313	4.18195	3.52823	2.83777	2.45553	2.62918	3.48922	1.91093	3.00495	3.41509	2.75451	2.18937	1.95607	2.41083	2.29031	2.47623	2.83862	2.36539	3.0932	4.19495	1.30896	4.05716	3.4647	2.90344
Iso_D.4063.1	-1	-1	-1	7.77764	-0.968456	-1	-1	-1	-1	-0.273504	-1	-0.514244	0.670455	0.275605	-1	1.46715	0.446073	-1	-1	0.442782	-1	-0.750436	-1	-0.409729	-0.408276	-1	4.11512	4.26479	2.04957	5.36388	4.53372	6.16769	6.30775	6.55661	6.10313	5.69783	5.00795	3.63635
Iso_D.4095.1	7.16916	7.41223	7.86924	7.50314	6.29463	6.26907	6.177	7.22442	7.29302	7.35839	6.39876	6.3824	6.68125	6.41655	6.26776	5.97683	5.96073	5.89839	5.87143	5.19033	5.74575	6.51027	6.84283	5.93462	6.26523	6.02883	4.86328	6.10249	6.30656	6.91697	7.63253	7.12214	7.60794	7.82772	7.32259	8.07532	8.05024	7.82601
Iso_D.4206.1	0.434765	-1	-1	1.2455	-1	-1	-0.634162	-1	3.0926	0.318599	-1	0.668632	2.06042	0.153697	-0.274412	-0.359717	-0.571194	-0.164698	1.32697	0.355357	0.123646	-0.275868	0.211212	-1	-0.446873	-1	1.62052	1.31884	0.0183022	-0.526878	0.213159	-1	-0.455696	-0.333841	1.59212	-1	-0.503349	-0.447464
Iso_D.4272.1	-1	-1	-1	-1	-1	-1	-1	-1	-1	1.14387	-1	-1	-1	-1	-1	-1	-1	0.759254	-1	0.0137506	-1	-1	-1	-1	-1	-1	-1	-1	-1	-1	-1	-1	-1	-1	-1	-1	-1	-1
Iso_D.4307.2	0.561334	-1	1.01441	-1	4.86363	0.164362	-0.181063	0.0623112	0.39444	-0.684362	0.553279	0.160323	0.227123	0.580944	-0.301255	0.777305	1.47931	0.558261	1.40065	0.626382	0.888412	0.876098	1.04039	1.31413	1.94589	1.60221	1.36585	2.29654	1.87629	1.9883	2.33654	3.21922	3.46748	3.68918	2.8161	4.36326	4.21424	4.29776
Iso_D.432.1	-1	2.15141	-1	2.36429	0.472075	-1	2.40225	1.40665	1.50396	2.04694	-1	0.990469	0.416506	-1	0.630141	2.46738	1.42355	1.84494	0.599272	0.953359	1.88742	0.329565	1.63349	1.59391	2.45526	2.372	2.73082	2.05782	2.12744	1.80041	0.773902	1.80504	2.08418	1.78658	1.55438	0.45614	0.888498	1.15759
Iso_D.4334.3	-1	-1	-1	-1	-1	-1	-0.816789	-1	-1	-1	-1	-1	-1	-1	-0.621549	-1	-0.145487	-0.646771	-1	-0.762208	-1	-0.630442	-1	1.02569	-1	-1	0.48486	-0.292081	0.47401	-0.480571	-1	-1	0.743359	-0.32656	-1	-1	0.891835	-0.873458
Iso_D.4497.2	1.03014	-1	-1	-0.456465	-1	1.01108	1.01577	0.255537	1.02262	0.485158	0.715617	1.01759	0.266282	1.82739	1.02402	-0.0719321	0.344708	-0.294334	0.562328	0.839962	0.51004	0.281204	-0.203941	-0.0789174	-0.0606705	0.308186	-0.574312	0.0728171	0.541834	0.565377	-0.600324	-0.750132	-1	-1	-1	-0.344426	-0.632778	-0.60744
Iso_D.4623.1	-1	-1	-1	-1	-1	-1	-1	-1	-0.0931152	-1	-1	-1	-1	-1	-1	-1	-1	-1	-1	-1	-1	-1	-1	-1	-1	-1	-0.283457	0.263299	-1	0.160149	-0.180802	-0.510932	-0.308847	-1	-1	-1	-1	-0.529947
Iso_D.4640.1	-0.284182	-1	1.90309	-1	-0.230634	-0.815665	-0.534377	-1	-1	-0.488113	1.44584	-0.441677	0.329102	-1	-1	-1	-1	-0.278079	-1	-1	-0.618358	-0.82824	-0.856783	-1	-1	-1	2.49257	0.339771	-0.419512	1.2385	1.14648	3.41186	3.14287	3.51079	2.42537	1.4572	1.72741	-0.0300793
Iso_D.4766.1	-1	0.466363	-1	-1	1.28999	-0.336267	-1	0.456376	-0.463726	-0.0201599	-1	-0.59253	-0.585215	0.94161	-0.620261	0.817563	1.29769	0.184556	-0.775541	-0.324719	0.30457	-0.23337	-0.14083	-0.220511	-0.00849147	-0.409813	-0.443582	-0.186579	-0.0760233	-0.780706	-0.45101	-0.55756	-0.25263	-0.421754	0.135212	-0.271052	-0.483074	-0.192112
Iso_D.4789.1	-1	-1	-1	-0.36307	-0.987904	-0.276141	-0.531798	0.633882	0.152517	-1	-1	-0.473532	-1	-0.169293	-1	0.301404	-1	-1	-0.190385	-0.843088	1.12006	-0.471779	-0.0785238	-0.116474	-0.72424	0.121815	-0.393738	-0.150416	-0.528018	-0.483808	-0.641729	-0.626377	-0.634687	-0.549694	-0.749892	-1	-0.505984	-0.652448
Iso_D.4803.1	8.90409	9.36301	8.4488	8.33418	8.38341	6.83164	4.5479	6.62772	6.28997	7.54107	8.47081	9.64772	8.42118	7.07327	7.53146	6.74062	6.98068	5.18963	6.10501	7.35295	5.94471	5.92352	7.20023	5.23395	5.33776	3.5978	2.85659	4.12881	5.55298	6.78666	6.05577	5.68014	5.84471	5.78541	4.4932	4.24193	5.4359	3.89912
Iso_D.4806.4	-1	1.54425	-1	-1	-1	-1	0.00128303	-1	0.259296	0.857711	0.69944	1.55036	0.627574	1.64605	0.461458	1.86324	0.497809	-0.144869	3.06341	0.614845	0.300535	-1	0.053289	-1	0.572237	0.171681	0.444765	1.07363	-0.611472	-0.823789	-0.0774601	-1	0.635677	0.271061	-1	-1	-0.128616	-1
Iso_D.4840.1	1.42014	3.59094	0.50708	0.796554	2.24654	1.76286	2.61087	2.7099	1.77162	1.89527	1.67441	0.15181	1.46311	1.4504	0.908817	1.57311	-0.0556509	2.22668	0.953866	1.02241	1.45942	-0.420189	0.821633	0.923228	-0.0739213	0.935924	-0.0902004	1.96141	2.11324	1.31859	1.64779	-0.123022	0.333699	0.45696	-1	-0.051095	0.292512	-0.0456613
Iso_D.4959.1	1.56668	1.74527	3.61785	0.988832	0.698845	1.16083	1.1158	1.68506	1.55768	1.39924	1.78209	0.850049	2.06597	2.21965	2.48541	1.78988	2.19977	1.6927	2.4229	2.13805	2.34572	1.59083	2.48388	1.80619	2.03504	2.53011	1.69878	2.27748	2.67676	2.98904	3.21293	2.18733	2.60525	1.52829	2.06361	1.61472	2.26925	2.4415
Iso_D.5005.1	2.70069	2.51849	3.01062	5.44428	4.03202	2.2657	2.81495	1.76356	2.76	3.78013	4.75778	3.35087	3.77863	2.68486	2.85682	4.03292	2.85111	3.45112	4.03847	4.14381	3.7449	2.9165	2.3623	3.94017	4.16646	3.79114	3.28779	4.31546	4.00598	4.50236	4.15969	4.99996	4.47787	4.7512	4.48146	5.65658	5.17202	5.53504
Iso_D.5010.1	0.488306	1.3109	1.10151	0.516924	-0.046423	-0.0827111	-0.207378	0.172752	0.522659	0.397526	-0.0096571	-0.0243532	-0.44807	0.322891	0.209162	1.15202	-0.663915	0.132346	0.0495067	0.474817	0.566691	0.123901	0.0797312	-0.244022	0.782354	0.165423	-0.0216287	0.34359	0.0533144	0.461902	0.120892	0.382378	0.485588	0.512969	0.636742	1.1986	0.683318	1.16216
Iso_D.5034.1	-1	-1	-1	-1	-1	-1	-1	-1	-1	1.45153	-1	-1	0.440155	-1	-1	-1	-1	-1	-1	-1	2.69381	-1	-1	-1	-1	-1	4.02659	2.69339	2.09689	3.2797	2.75322	4.4645	4.87539	5.83074	4.50811	3.99693	3.47755	1.74379
Iso_D.5042.1	2.73954	3.9813	-1	8.9914	7.04298	0.48896	2.4341	2.80247	3.78483	5.30549	3.46568	3.8998	4.03159	2.16399	2.16136	0.770344	0.34781	3.63332	1.23985	3.15753	3.47584	1.47853	0.735901	-0.140508	2.0018	0.932695	8.48739	9.85571	8.28181	10.6977	9.54083	12.0414	13.4626	13.2015	12.2068	13.0156	12.5079	10.8713
Iso_D.5045.2	3.19385	3.74853	4.28545	4.62462	4.08067	3.51886	3.96463	4.16763	4.32722	3.9215	3.41878	3.81445	3.13855	4.55639	4.7182	3.90792	4.35991	3.93125	3.70098	3.32395	3.73937	4.01376	3.48431	3.79073	3.42865	3.34311	3.87801	3.97024	4.13306	3.42601	3.74166	3.2957	3.52525	3.4993	2.33459	3.23079	4.2444	3.56019
Iso_D.5048.1	-1	-1	-1	-1	-1	-1	0.41101	0.66414	0.341402	-1	-1	-1	-1	-1	-1	-1	-1	-1	-1	-1	-1	-0.303785	-1	-1	-1	-0.290345	-1	-1	-1	-1	-1	-1	-1	-1	-1	-1	-1	-1
Iso_D.5137.1	-0.0976899	0.228249	1.60173	-1	1.06957	-0.165538	0.197142	0.0193731	0.016549	0.343541	0.206823	-0.331973	0.309386	-0.0627153	0.186852	-0.68276	-0.0540558	-0.777427	-0.492469	-0.381185	-0.308612	-0.172089	-0.777232	-0.628621	-0.842141	-0.642357	-0.514452	-1	-0.547265	-0.104525	-0.779625	-0.530428	-0.844722	-1	-1	-1	-0.788143	-0.562616
Iso_D.5261.1	3.60658	5.10245	5.62589	6.79249	3.18915	2.77717	3.55599	4.03848	4.02987	7.50504	3.52245	3.53433	3.86894	4.38757	4.88607	5.14339	4.22299	4.13819	4.30165	4.20102	4.26861	3.9703	4.51214	4.79186	4.83961	4.51312	4.03205	4.83066	4.083	4.65982	4.53754	5.28355	4.76576	4.816	3.9305	5.27544	5.3338	5.64797
Iso_D.5284.1	-1	-1	1.56722	-1	-0.971129	-1	-1	-1	3.4679	2.71662	3.34597	-0.639096	0.00113165	2.33731	-1	-1	0.313442	-1	3.10553	1.26104	-1	-0.769412	0.675604	-0.0534443	0.109924	-0.587936	-1	1.06129	1.18684	1.04417	-1	-1	-1	-0.0830458	-1	-1	-0.923314	-0.419808
Iso_D.5359.1	-1	0.641892	2.04028	-1	0.378558	0.359049	0.86227	-0.651747	1.5568	-1	2.44657	0.663131	2.47786	0.154033	1.45462	1.64248	0.128787	0.0998396	1.0009	0.172778	1.04728	-0.418892	0.165232	0.896547	-0.194512	0.0479072	0.626817	3.05624	1.05094	3.4391	2.25897	4.6071	5.75607	5.61761	5.27299	6.05485	7.0173	7.20788
Iso_D.5361.1	-1	-1	-1	4.24407	-1	-1	-1	-1	-1	-1	-1	1.33348	-1	-1	-1	4.14201	-1	-1	1.71474	-1	-1	-1	-1	-1	-1	-1	-1	-1	-1	-1	-1	-1	-1	4.27321	-1	-1	3.05665	1.17449
Iso_D.5362.1	-1	2.88958	-1	-1	1.94548	0.464925	0.739069	1.08334	-1	-1	0.00185903	0.279644	1.89142	0.00804221	-1	1.82494	-1	-0.17114	-1	-0.655394	-0.637815	-0.554013	-0.522447	-1	0.0167037	-1	-1	-1	-0.254525	0.150404	-0.865016	-0.545032	-1	-1	-0.305345	0.237998	-0.754425	-0.346936
Iso_D.5366.1	3.06074	4.4694	5.09885	3.51419	2.61761	3.31783	3.82213	4.11294	4.36758	3.41051	4.2183	3.22459	4.12367	4.33314	3.34419	4.55178	4.65485	3.96864	2.14538	3.79622	3.99892	3.37061	3.23759	3.24905	4.10487	3.70879	3.04603	3.76237	3.58386	3.83551	3.1361	3.25525	3.86841	3.98041	3.75003	3.54357	4.29204	4.3369
Iso_D.545.1	-1	-1	-1	-1	-0.977223	-0.606803	-1	-1	-0.412389	-1	-1	-0.707786	-1	0.386772	-0.502115	-1	-1	-1	-1	-1	-1	0.927593	1.53908	0.374068	-0.173562	-0.249598	-0.280158	-0.678936	-0.135863	-0.930994	-1	0.192811	-1	-1	-1	-1	0.194537	0.0172063
Iso_D.5476.7	0.941937	1.5067	1.34299	1.33819	1.13941	1.58234	1.81347	1.94023	2.16403	1.9764	1.20531	0.933517	1.36557	0.942464	0.844278	1.19938	0.840851	1.93418	1.47803	1.2565	2.07973	1.16107	1.26556	1.48894	1.78623	1.1674	1.15358	1.04266	0.732022	0.66538	0.99641	1.72152	1.83699	2.54476	1.43445	3.6773	1.83179	2.59863
Iso_D.5498.1	4.11719	5.80228	-1	5.64071	4.04437	4.32833	4.13442	0.463341	3.35991	3.11018	2.49194	1.9781	1.8513	3.5856	3.77071	4.93097	4.74505	4.2014	0.734853	1.92307	3.98145	2.22605	1.5254	1.51703	3.49254	5.37165	2.09846	2.47598	1.18069	1.22432	0.566586	2.67343	2.57948	2.92442	2.72616	-1	2.49713	1.43058
Iso_D.5501.1	4.29849	5.42217	5.74171	5.44399	4.76186	4.58578	4.82617	5.46486	5.445	5.75532	4.63037	4.13383	4.22022	4.21191	5.21904	5.4688	6.45196	5.65344	5.72131	5.1264	5.31079	4.8714	5.30182	5.3029	5.90546	5.37021	4.78711	5.94852	5.27114	5.81231	5.54423	6.64531	5.77062	5.78316	5.29487	6.94643	6.42531	6.79161
Iso_D.5622.2	-1	-1	-1	-1	-1	-1	-1	-1	-1	-1	-1	-1	-1	-1	-1	-1	-1	-1	-1	-0.764775	-1	-1	-1	0.262135	-0.27963	0.0253916	1.2151	2.47585	0.881958	3.74111	1.1118	3.92604	4.15826	3.92333	3.58031	3.39423	3.11034	1.60998
Iso_D.5693.1	0.99806	-1	-1	-1	1.27576	-0.541079	-0.0827414	-0.628551	2.30753	1.16537	-0.0550713	1.08542	-1	-1	-1	-1	-1	0.950985	-1	-0.401107	3.1704	-1	-1	-1	-1	-0.306489	-1	-1	-0.647341	-1	-1	-1	-1	-1	-1	-1	-1	-1
Iso_D.577.2	2.67186	0.738438	-1	1.32111	-0.950854	-0.274205	0.126922	0.357015	1.54195	-0.671829	-0.460491	0.444173	-0.19701	0.465083	-0.36534	1.46531	1.20851	2.02224	2.22151	1.38393	1.64069	0.719971	0.806225	0.831174	0.775115	0.14383	0.524025	0.446085	0.299349	0.757315	0.8051	0.234518	-1	-0.663059	-1	-1	-0.504871	-0.835208
Iso_D.577.7	-1	-1	-1	-1	-1	-1	-1	-1	-1	-1	-1	-1	-1	-1	-1	-1	0.68334	0.812458	-1	-0.139364	-0.199817	-0.274637	0.442906	-0.2326	-1	-0.516914	-0.138193	-0.694054	-1	-1	-1	-1	-1	-1	-1	-1	-1	-1
Iso_D.5784.1	4.65937	3.43316	3.28745	3.52021	3.59426	2.88395	2.1168	3.17439	3.55105	2.36672	2.04331	3.58875	3.32528	3.33831	2.92243	2.46786	3.67461	2.54006	1.8382	1.63858	1.40359	1.82519	2.16938	2.04821	1.6477	0.936971	1.97469	1.04283	2.10249	0.786961	1.85457	0.682437	2.58415	2.93578	1.31256	2.96228	2.44143	1.69861
Iso_D.5787.1	-1	-1	-1	-1	-1	-1	-1	-1	-1	-1	-1	-1	-1	-1	-1	-1	-1	-1	-1	-1	-1	-1	-1	-1	-1	-1	-1	-1	-0.77989	-1	0.350626	-1	0.717679	0.25849	-0.407826	-1	-0.835035	0.000185304
Iso_D.5838.1	3.8027	4.4147	-1	4.34106	4.6804	3.79385	2.81061	3.00441	3.29663	5.56996	3.69468	2.6411	3.01885	3.53049	3.11357	2.24841	3.27753	1.86492	5.51418	2.53205	1.68618	1.54852	1.20342	1.72635	1.14488	-1	8.84267	7.08561	4.15802	8.20733	6.71978	10.3985	12.5579	12.3995	11.5427	12.1142	12.0189	9.91423
Iso_D.5920.2	4.05258	3.43685	3.86779	4.64102	4.4713	4.8664	5.27441	4.52604	5.22729	4.59273	5.79715	4.69914	3.54787	4.47767	3.28019	4.71346	5.06145	5.01749	5.9147	4.37964	4.55268	4.54663	4.22052	4.89061	5.13871	4.69025	4.14683	4.9122	5.64611	5.26687	4.98317	4.62153	4.92241	4.10693	4.44996	4.53574	4.90409	4.68574
Iso_D.594.1	-1	-1	-1	-1	-1	-0.801013	-1	-1	-0.211201	-0.470516	-1	-1	-0.462127	-0.373556	-1	-0.545714	-1	-0.353437	-0.428672	-0.364152	-1	-0.689823	-0.461327	-0.401578	-0.554326	-0.219641	-0.14032	-0.162249	0.0985681	-0.175046	0.171066	-0.385726	-0.238317	-0.0584593	-1	-1	-0.243131	0.0500895
Iso_D.5944.1	2.49645	2.12193	1.51808	2.82607	1.63851	1.11956	1.98138	1.43783	2.52227	0.356871	1.81539	1.79993	1.88866	1.88848	1.93438	2.14904	0.303389	-0.120063	3.70338	-0.00119475	1.26168	0.138472	-0.189677	1.35377	0.746611	0.139527	1.3948	0.0555142	1.22898	-0.483192	0.438542	0.774357	1.09645	-0.340595	-0.106821	0.365437	0.425531	0.178376
Iso_D.5945.12	1.35259	-1	2.99149	2.87918	1.65755	3.12607	2.83183	2.23238	3.21408	2.67121	2.59975	2.66377	2.87994	2.80103	1.47783	1.15222	0.769946	1.29042	1.56209	1.08987	1.35394	0.390574	0.433042	0.329401	0.657432	0.149695	0.431877	-0.151662	2.03702	0.775642	-0.348903	-0.423159	-0.333612	-0.602702	-0.696313	-1	-0.475005	0.146384
Iso_D.5946.2	2.06801	3.72306	2.56139	0.700153	3.32306	1.8665	2.36065	2.96256	3.27993	2.244	3.14493	2.13294	1.53247	2.44308	3.57019	1.8503	2.32494	2.14639	2.54153	2.66429	2.18804	0.948155	1.55607	1.47957	0.763586	0.922242	1.2479	1.10973	2.45753	0.536274	1.39452	0.216687	1.05832	0.0127749	-0.176892	0.704263	0.0445952	-0.135968
Iso_D.6071.3	3.51109	2.54704	3.28408	4.3359	3.96694	3.18833	3.43246	3.28336	2.36622	2.70527	2.63885	2.06594	0.5521	2.33453	1.90302	1.97012	0.982568	2.48417	-0.0107898	1.55731	2.18342	0.4789	2.8343	1.05167	1.56765	0.528518	1.34683	0.146215	0.302386	3.76493	1.01288	-1	1.54428	1.32223	-1	-1	0.638156	0.00208335
Iso_D.6086.1	3.8457	3.87411	2.31738	4.2431	3.68023	3.2733	3.2367	3.78168	4.11071	3.42847	2.95737	4.28067	3.40924	4.52183	3.31175	2.26212	4.02163	3.29666	1.31366	3.12601	2.67817	2.8949	4.16274	3.30507	1.78204	1.93886	2.54465	1.16931	4.27237	2.22591	3.67225	1.94446	1.59614	-0.622902	1.01613	-1	1.02616	0.874533
Iso_D.6095.1	-1	-1	-1	-1	-1	-1	-1	-1	-1	-1	-1	-1	-1	-1	-1	-1	-1	-1	-1	-1	-1	-1	-1	-1	-1	-1	1.15406	1.79665	0.0357166	3.28182	2.0926	4.08139	4.20945	3.44135	2.95124	2.80416	2.13008	0.351797
Iso_D.6097.1	-1	-1	-1	-1	-1	-1	-1	-1	-1	-1	-1	-1	-1	-1	-1	-1	0.2859	-1	-1	-1	-1	-1	-1	-1	-1	-1	0.666789	0.347799	-0.38276	1.22463	0.241641	1.85625	2.48158	2.67053	0.469573	1.03673	0.822899	0.0542673
Iso_D.6098.1	-1	-1	-1	-1	-1	-1	-1	-1	-1	-1	-1	-1	-1	-1	-1	-1	-1	-1	-1	-1	-1	-1	-1	-1	-1	-1	0.21524	-0.466325	-1	-0.645145	-0.00525194	1.5894	0.781532	1.29153	1.37137	2.09073	0.702439	0.0167404
Iso_D.6099.1	-1	-1	1.41014	-1	-1	-1	-1	-1	-1	-1	-1	0.338033	0.336789	0.530416	-1	-1	-1	-1	-1	-1	0.77786	-1	-0.403201	-1	-1	-1	-1	-1	-1	-1	-1	-1	-1	-1	-1	-1	-1	-1
Iso_D.6160.1	2.8165	3.04994	3.94207	5.27802	5.55267	3.2586	3.65393	4.1927	4.33802	3.98065	3.1088	3.30196	3.18039	3.68823	4.46475	4.28645	5.80037	4.47525	4.6345	4.27928	4.4855	4.3034	4.12609	4.36213	4.76124	4.49135	4.38293	5.70951	5.15429	5.58375	5.27246	6.88656	5.70895	5.69853	5.01203	6.93389	6.45646	6.95226
Iso_D.6161.1	1.56494	3.17131	2.01778	-1	0.22853	0.49416	0.897977	1.32069	2.32281	1.59019	2.70126	1.05704	1.37004	0.959643	3.39997	0.863407	1.26897	1.90865	1.74644	1.78909	1.88366	1.98106	2.08502	1.56432	1.94561	2.46479	2.40422	3.05204	2.50472	2.72056	2.2283	2.50515	3.3701	3.35931	2.83425	3.06749	4.27152	4.60718
Iso_D.6178.1	5.14564	6.0611	6.52553	5.64385	5.53533	5.06882	5.53886	5.98296	5.85763	8.10836	5.11562	4.54989	4.65681	5.21688	6.1335	6.47999	7.59509	6.43221	5.67515	5.46393	5.63959	4.98855	5.75811	6.1352	6.54614	6.19699	5.34263	5.77401	5.26318	5.34504	5.07027	6.20064	5.51759	6.15232	4.98315	7.06156	5.79795	6.33893
Iso_D.6199.1	-1	-1	-1	-1	-1	-1	-1	-1	-1	-1	-1	-1	-1	-1	-1	-1	-1	-1	-1	-1	-1	-1	-1	-1	-1	-1	-1	-1	-1	-1	-1	-1	-1	-1	0.32842	1.70325	-0.296533	-1
Iso_D.6227.1	-1	-1	-1	1.29054	0.236552	-0.334492	-0.33037	0.0957935	0.391278	-1	0.744262	-1	-0.720795	-0.00568168	-0.342096	0.369169	0.0282313	-1	-0.179057	-0.517121	-0.381131	-0.752044	0.220987	-0.51601	-0.722218	-0.354943	-1	-0.782607	-0.604134	-1	-0.656497	-1	-0.300344	-1	-1	-1	-1	-0.720248
Iso_D.623.1	-1	1.39135	-1	-1	-1	0.391544	-0.434709	-0.287086	1.12563	-1	0.864472	-0.457854	-0.602176	-1	0.102833	-0.430903	0.702579	-0.156604	-1	-0.493414	1.05601	-1	-0.0679906	-0.360621	-0.398054	-0.335752	-0.833257	-0.737974	-0.869297	-0.944647	-0.76011	0.19915	0.151645	-0.44508	-0.349741	-1	-0.859116	-0.286785
Iso_D.624.2	4.31431	3.21987	4.13862	4.66526	3.02751	3.54154	3.7117	4.06974	3.86976	8.44772	1.98704	3.05818	3.12411	4.55704	3.6921	2.24192	3.51984	4.41174	1.95438	2.7472	4.18143	4.14414	4.08445	4.23801	4.85608	4.28456	3.68121	3.10531	2.77712	2.35683	4.57782	3.55509	4.08722	4.05252	4.21621	3.45688	3.79694	3.61957
Iso_D.6287.1	-1	1.75745	2.09	-1	2.10959	-1	0.503454	0.458611	1.35095	-1	1.75388	0.965654	-0.0693203	1.50476	1.05023	-0.413424	-0.0510621	0.642953	-1	0.677405	-0.38473	0.590562	-0.110977	-0.627235	-1	-1	-1	-1	0.121582	-1	-1	-1	-1	-1	-1	1.92105	-1	0.20162
Iso_D.6301.1	-1	-1	-1	-1	-1	-1	-1	-1	0.615713	-1	-1	-1	-1	-1	-0.393335	-1	-1	2.00705	1.02181	1.97591	-1	0.501692	-1	1.37338	1.84108	-1	-1	-1	-1	-1	-1	-1	-1	0.988323	-1	-1	-1	-1
Iso_D.6308.1	-1	-1	3.82866	-1	-1	0.576318	-0.661971	0.207893	-1	-1	0.546009	-0.225737	-0.120555	1.44221	-0.336415	-1	-1	-1	-1	-1	-0.206341	-1	-1	0.14121	-1	-1	-1	-1	-1	-0.497698	-1	-1	-1	-1	-1	-1	-1	-1
Iso_D.6308.2	0.76913	-1	-1	-1	1.72481	1.41578	-1	0.445884	-0.0708478	0.431036	-1	0.694768	0.922274	-1	-1	-1	-1	-1	-1	0.625496	-1	-1	-1	-1	-1	-1	-1	-1	-1	-1	-1	-1	-1	-1	-1	-1	-1	-1
Iso_D.6310.1	3.54673	4.01431	3.93228	3.66629	4.66581	3.00219	3.6009	2.48882	3.1994	7.32591	3.15277	3.23249	4.51059	3.7225	4.48436	3.89048	3.74318	3.4514	2.71425	3.01903	2.56514	2.29137	2.23688	3.18019	3.30671	2.72376	2.86495	2.79858	3.26752	2.20192	2.53823	2.77677	2.30207	3.52069	1.33108	2.43513	1.1954	1.3944
Iso_D.6321.1	-1	-1	-1	-1	13.4609	-1	12.0933	-1	8.92677	-1	-1	7.76984	-1	4.5185	-1	-1	-1	6.14528	-1	-1	-1	-1	-1	-1	-1	-1	-1	-1	3.39078	-1	3.13751	-1	-1	-1	-1	-1	-1	-1
Iso_D.6422.1	0.553279	0.697998	2.80176	0.546781	-0.127261	0.734629	-0.375618	-0.0105937	-1	0.447428	-0.224954	0.675511	1.03303	1.84643	2.11421	0.706458	0.656151	0.471297	0.583746	0.109001	1.76816	1.49583	0.848414	1.40313	1.84865	0.193072	0.839946	1.49633	0.417645	0.632277	0.705178	0.672856	1.72481	2.17952	3.64703	2.428	4.37693	4.62365
Iso_D.6438.1	1.49009	2.01626	0.0520376	1.89214	0.649673	0.587909	0.814659	0.733979	1.09683	0.867655	1.68514	0.607745	0.0239584	1.32129	-0.0606408	1.48942	0.724788	0.194885	0.0728079	0.730719	0.41379	0.779826	0.997164	0.939052	0.598551	0.484297	0.23089	0.934961	0.654106	0.0372357	0.217816	0.77947	1.20873	1.14477	1.06056	1.22465	1.45771	1.51793
Iso_D.6554.1	-1	-1	-1	-1	-1	-0.695578	-1	-1	3.20569	-1	-1	-1	-1	-1	-1	-1	-1	-1	1.7031	-1	-1	-1	-0.835724	-1	-1	-0.848361	1.61265	2.57034	-0.910787	-1	-1	-1	-1	-1	-1	-1	-1	-1
Iso_D.6566.1	-1	-1	-1	-1	-1	-1	-0.61994	-1	-1	-0.166716	-1	-0.220391	-1	-1	-1	-1	-1	-1	-1	-1	-1	-0.335433	-1	-1	-1	-1	-1	-0.125517	0.494904	-1	-0.501307	-1	-1	-1	-1	-1	-1	-1
Iso_D.6580.1	2.36015	-1	3.96041	-1	-1	-1	-0.410634	0.323422	0.0370159	1.30793	-1	0.875041	3.43894	-0.456431	4.47027	1.92665	-1	-1	-1	-0.472793	0.788271	-0.643125	-0.352935	-0.194975	-1	-1	-1	0.122351	0.452546	-0.32014	-1	-1	0.3751	-1	-1	-1	-1	0.494642
Iso_D.6600.2	-1	-1	-1	-1	-1	-0.462426	-1	-1	5.94553	5.08423	0.513485	-0.189916	-1	-1	-1	1.11243	-0.520517	-0.4669	4.81176	0.42209	-1	-1	-1	-1	-0.155934	-0.338986	4.86978	6.3692	-0.671664	-0.748633	-0.627346	-0.634328	-1	-1	0.933012	-1	-1	-1
Iso_D.6620.6	1.39322	2.72581	-1	1.05991	1.70659	-0.150821	1.14953	1.02238	0.249614	0.755668	0.790767	0.25526	1.20579	0.871597	-0.646514	0.701679	-1	0.72384	0.499653	0.410625	0.281404	-0.813131	0.917114	-0.754313	-1	-0.386421	-0.715563	-0.310534	-1	0.0283749	0.646712	-0.677754	-1	-1	-1	-1	-0.938602	-0.517896
Iso_D.6642.1	1.88081	1.48513	1.04134	0.712115	0.818456	0.678501	1.01129	1.38809	1.53594	1.87957	0.0882707	0.758469	0.268992	0.415976	3.09914	1.40286	1.62394	1.48787	1.2093	0.486413	1.14627	0.995583	0.0388927	0.942799	0.789778	0.672	0.448947	0.65837	0.455888	0.630698	0.552742	1.05137	1.07225	1.49199	1.00746	0.152679	1.47027	1.5867
Iso_D.667.1	-1	-1	-1	-1	-1	-1	0.203509	-1	0.500998	-1	-1	-1	-1	-1	-1	-1	-1	-1	0.253219	-1	0.410169	-1	-1	-1	-1	0.251864	2.44081	1.95573	0.449771	3.68515	2.89234	5.27748	5.22825	5.18835	4.2772	4.78585	3.74248	1.72757
Iso_D.668.2	3.62426	3.31105	4.36101	3.61921	2.33108	2.68623	3.55343	3.50954	3.51627	3.35197	2.6026	1.81395	2.98124	3.22718	3.77984	3.70016	3.61702	2.67836	3.30863	2.31774	1.18013	2.1316	2.54809	2.39926	2.02727	1.4797	1.4021	1.7887	2.15135	1.50563	2.33806	0.872501	1.6202	1.26448	1.00823	1.44333	1.17891	1.00229
Iso_D.6849.1	1.75483	0.532341	1.56037	-0.556916	1.16413	0.480446	0.436743	0.0692834	0.0647145	-0.284895	0.147456	0.220326	0.141105	0.256953	2.28328	0.714477	0.739488	0.255243	1.40896	0.47464	0.242129	-0.471406	0.162225	0.190289	-0.18229	0.328959	0.498362	-0.0628038	-0.0515248	-0.547042	-0.185722	0.000143944	-0.0914902	0.52933	0.0631546	-0.654031	0.312663	0.0917873
Iso_D.685.2	-1	-1	-1	-1	-0.732103	-0.173192	-0.391815	-1	-0.521135	-0.513432	-1	-0.780189	-0.236539	-0.450694	-0.47969	-0.272644	-0.481711	-0.196111	-0.689096	-0.366631	-0.202272	-0.890689	-0.50988	-1	-0.436516	-0.595962	-0.912449	-1	-0.769627	-0.270905	-0.957841	-0.908544	-0.177708	-0.64983	-0.647896	-1	-0.805114	-0.832646
Iso_D.6925.1	-1	-1	-1	-1	-0.819901	-1	0.717786	0.422416	0.0370159	0.573304	-1	-0.0342257	-1	2.15422	2.83896	2.8966	-1	1.69579	0.398836	0.332598	2.47746	0.934271	1.34404	1.20524	0.739657	0.601635	1.65079	2.93436	2.77281	2.52941	2.5181	2.31468	3.20416	3.23571	2.70997	3.48286	3.3947	3.34721
Iso_D.6972.1	-1	-1	-1	-1	-1	-1	-1	-1	-1	-1	-1	-1	-1	-1	-1	-1	-0.188427	-0.104636	-1	-1	-1	-1	-1	-1	-1	-1	-0.0298251	-0.404885	-0.699866	-0.16871	-0.2215	2.36552	1.96134	2.04554	0.722494	1.47621	0.408471	0.129365
Iso_D.7023.1	1.84358	1.95065	2.984	3.3578	2.11698	1.28012	2.5957	2.46472	1.6373	4.93716	1.47535	1.29733	2.00876	1.77289	2.47003	2.71827	4.73243	3.25569	2.85867	1.95769	2.64772	2.20912	2.044	2.77484	2.64374	2.83125	2.58289	3.31842	2.44154	3.17462	3.24666	3.77084	3.66322	3.81262	3.16303	5.88478	4.09302	4.75894
Iso_D.7030.1	1.66477	2.18481	3.14168	3.4482	0.870901	1.2143	1.1611	0.687218	1.51567	1.48369	1.32806	0.873316	1.97735	1.69089	0.833364	1.77023	1.38858	1.9276	2.56791	1.59975	0.934488	1.04514	1.90837	1.95985	2.39516	1.26976	1.26277	2.08015	1.77492	1.20613	1.92837	2.03932	2.03756	1.60326	2.32555	3.31339	2.6852	3.24542
Iso_D.7055.1	1.06831	1.41446	0.50708	-1	0.508408	-1	-1	-1	1.13746	-1	0.597761	-1	2.43659	0.23525	-1	0.01163	1.0824	0.662137	-1	0.305855	-1	-0.301256	0.168124	0.866817	2.0616	1.24841	3.5864	2.92342	0.874617	1.31983	3.61686	3.74089	4.10918	5.55157	2.04248	2.36431	3.80697	0.98385
Iso_D.7059.1	-1	-1	-1	-1	-1	-1	-1	-1	-1	-1	-1	-1	-1	-1	-1	-1	1.63035	0.390188	-1	-1	-1	-1	-1	-1	-1	-1	3.21926	0.867051	-0.224157	2.44496	1.24485	4.27223	4.13838	4.61536	3.26842	3.34412	2.21933	0.334874
Iso_D.7072.1	-1	-1	-1	0.0772654	-1	-1	-1	-1	-0.659945	-1	-0.169357	-1	-1	-0.419725	-1	-1	-1	-0.561346	-0.483844	-0.409415	-1	-0.757555	-0.529632	-1	-0.523085	-1	-1	-0.819007	-0.744793	0.00119595	-1	-1	-1	-0.253874	-1	-1	-1	-0.839565
Iso_D.7080.1	3.45229	3.07892	4.61939	2.76898	2.11188	2.62297	3.23471	1.19052	8.4237	10.2558	11.2938	10.2954	10.3382	5.39117	5.62424	3.71494	3.38402	1.47962	9.17559	10.3458	7.90448	6.97804	4.1337	3.22266	4.14223	1.46576	1.26745	7.40786	8.729	7.04756	5.36205	1.3689	3.09228	1.84466	0.204846	0.884136	0.143404	0.634372
Iso_D.7109.1	0.922813	1.75898	3.52729	1.59673	1.27725	0.852566	0.669045	1.29655	2.03549	0.670786	2.47003	-0.116158	0.916403	0.44142	1.25585	1.80374	1.08639	1.48918	0.557039	-0.0743899	1.19305	0.708615	0.251511	1.30514	1.31162	0.734428	0.23878	1.50537	0.284954	-0.394834	0.841841	0.409864	-0.0117287	1.06478	-0.570721	-0.184424	-0.0642667	-0.163201
Iso_D.7127.3	0.555214	-1	-1	-1	-0.96505	-0.449567	-1	-1	0.126965	-1	-1	0.767846	-0.319397	-1	-0.726201	-1	-1	0.916984	-1	-0.255346	0.430061	-0.204928	0.801232	-0.644605	-0.0727314	0.375975	-1	1.49221	0.252088	-0.310172	0.608261	0.495839	1.06443	0.204173	-1	1.48936	1.13721	0.61953
Iso_D.7141.1	2.65343	2.54978	5.06296	1.30979	1.33639	2.16956	1.60744	2.34584	2.52656	2.91074	2.47756	1.50697	1.88111	2.6529	2.76917	2.72972	2.3762	2.55408	2.51885	2.55626	3.38378	2.56542	2.91212	3.66914	3.48052	3.54399	2.85074	4.21763	3.60809	4.20804	3.78292	4.76964	4.0536	4.56518	4.46592	4.86648	4.72172	5.15326
Iso_D.7142.1	1.8197	3.15497	3.24707	2.79123	1.91497	1.44803	2.10419	2.66241	2.65225	2.53385	3.1629	2.56738	1.94207	2.91652	2.55631	2.76759	2.74074	2.71235	1.2427	2.78436	2.66288	1.7814	2.41086	2.46141	2.7204	2.45405	1.46569	2.48376	2.11553	1.97849	2.38969	3.1197	2.83908	3.10387	2.21689	2.41323	3.52591	3.64644
Iso_D.7198.1	-1	-1	-1	-1	-1	-1	-0.863042	-0.711778	-1	-1	-1	0.751816	-1	-1	-1	-1	-1	-1	-1	-1	-1	-1	-1	-1	-0.617296	-1	3.63308	2.91803	2.27584	4.12744	2.48995	5.39559	4.64737	5.07324	3.11261	3.97419	3.41807	2.14459
Iso_D.7199.1	1.48933	0.913429	3.15348	1.82522	-0.355988	0.145129	1.21988	0.698052	2.42387	2.70429	-0.676914	-0.023847	0.39298	1.42581	0.00796662	1.73575	1.18543	3.69806	3.88446	2.32279	1.93942	1.16034	0.487827	0.288862	1.43919	1.39013	1.59671	1.10988	1.50639	0.148405	0.943948	-0.116759	-0.390863	-0.607555	-0.700095	-1	-0.711003	-0.294651
Iso_D.7200.1	3.89512	4.37701	5.24401	4.50229	3.24469	2.24478	1.1975	2.67838	1.86521	2.39705	1.16399	3.00734	2.11494	2.34731	4.64439	5.27458	4.35465	3.68626	3.60537	2.26462	4.1997	2.77662	3.83221	2.90815	3.11489	2.07447	1.43526	0.886531	1.1061	1.43345	2.23535	2.87757	0.866141	-0.519096	0.593162	0.161361	1.23545	0.296076
Iso_D.7219.1	2.84637	0.657104	1.24125	1.84519	1.80645	2.33957	2.47471	1.85711	2.61114	2.66484	1.4457	1.72264	2.6323	1.24573	1.76864	2.65597	2.18483	2.11452	1.59581	2.11398	1.64062	1.73621	1.1978	1.07715	1.7337	1.72096	1.37994	2.08833	2.47055	2.58326	2.13474	1.93582	2.71157	2.77867	1.89104	2.09339	3.33907	3.34365
Iso_D.722.1	-1	-1	-1	6.15572	-1	6.23687	11.5084	4.29595	-1	-1	7.26381	-1	-1	2.7256	-1	-1	-1	-1	-1	-1	3.2388	-1	-1	2.05708	-1	3.52584	7.24759	6.51584	3.84401	6.72877	5.91489	8.14357	10.9374	9.97544	9.9096	9.75533	13.1943	8.13955
Iso_D.7221.1	-1	-1	-1	-1	-1	-1	-1	0.402685	1.03022	-1	-1	-1	1.35223	-1	-1	0.274852	-1	-1	-1	-1	-1	-1	1.2596	0.441091	-1	-1	-1	-1	-1	-1	-1	-1	-1	-1	0.409438	-1	-1	-1
Iso_D.7271.1	3.41664	2.26215	-1	2.67869	0.85057	-0.0163816	2.44493	1.01513	0.918227	2.87646	0.992097	1.14768	1.19077	0.470729	-0.0202654	1.08733	0.176111	1.52372	1.31453	1.85041	1.63297	0.775507	1.17268	2.79976	2.56281	1.5656	1.98127	1.91416	2.87555	2.66462	2.51125	2.81223	3.57889	3.37651	2.4504	2.50389	3.89336	3.45743
Iso_D.7272.3	-1	-1	-1	-1	-0.980156	-1	-0.855801	0.677924	-1	-1	-1	-1	0.0295487	-1	-0.689788	-1	-0.405553	-1	-1	-1	-1	-0.558403	-0.428506	-1	-0.255674	-0.245162	2.77941	2.11701	0.448938	2.72108	2.61121	4.13807	4.25911	4.78109	2.7533	2.53932	2.8329	0.922147
Iso_D.7387.1	1.06596	1.63532	-1	0.335003	-0.516257	0.280683	0.386779	1.30334	1.53713	1.58284	1.09973	1.05213	0.669314	0.466637	0.413384	-0.378041	0.115637	-0.252344	-0.864571	0.553028	1.01732	-0.216364	-0.329009	-0.514042	-0.528273	-0.0435214	-0.492026	-0.0912754	-0.356034	-0.668587	0.256272	-0.178117	0.434685	0.824203	0.0271895	0.102637	-0.601575	-0.360123
Iso_D.7406.2	-1	0.0299679	-1	-1	-1	0.0453782	-1	-0.0572543	0.496139	0.789225	4.03995	-0.532624	0.588659	2.29846	-1	-1	-1	-1	-1	0.926493	-0.139041	-0.142375	1.15294	-1	-1	0.868211	-1	-1	-1	1.04387	-0.199614	-1	0.259499	-1	-1	-1	-0.897289	-1
Iso_D.7434.6	0.474204	-0.2417	-1	-0.733547	-0.982395	0.509432	2.45848	2.4726	1.01751	3.00524	-0.0877106	-0.675547	-0.357545	-1	0.352448	0.687989	3.42298	2.72097	-0.269913	-0.828234	-1	-0.961896	-1	-0.831227	0.53909	2.48673	0.36922	-0.43888	-0.449542	-1	-0.875463	-0.883471	-1	-0.515702	-1	-0.67192	-0.907041	-0.886078
Iso_D.7491.1	-1	-1	2.39875	3.56505	2.9898	2.3623	1.73376	1.49714	2.56252	-1	-1	-0.151084	-0.582156	-1	0.976446	1.7622	2.16487	1.85245	0.480812	0.941227	2.47877	-0.866235	-1	0.942233	-0.119316	1.04275	0.391649	-0.354556	0.317471	-1	-0.691009	-1	-0.422558	-1	0.376787	-0.367009	-0.511662	0.0743428
Iso_D.7493.1	0.87607	2.39348	6.99042	6.17728	5.85533	3.60642	3.15059	4.07262	4.17956	-1	-1	0.354332	0.260086	1.80027	4.51608	5.55786	6.3808	4.06025	3.25402	2.61305	3.77114	0.0421492	0.892377	2.53872	1.3381	2.45369	3.40976	0.0449168	1.6442	-1	-0.173499	-0.186759	0.818449	4.39845	0.199415	2.00172	0.95953	0.280848
Iso_D.7494.2	-1	-1	-1	-1	1.74881	2.12696	-1	-1	0.843571	-1	-1	-1	-1	-1	-1	-1	0.92277	-1	-1	-1	-1	-1	-1	-0.486301	-1	-1	-1	-1	-1	-1	-1	-1	-1	-1	-1	-1	-1	-1
Iso_D.7530.3	3.67995	3.86164	4.97925	5.53877	3.4448	3.08364	3.21607	3.65833	4.25954	4.69447	2.84471	2.96332	3.02079	4.09695	4.07062	3.43314	3.67165	3.49252	4.12852	3.44413	3.39725	3.28541	3.08145	3.52073	3.3747	3.41986	3.74198	3.84309	3.90071	3.63013	3.83982	3.78954	4.64922	4.87821	3.35516	5.26435	4.55198	4.65784
Iso_D.7536.4	-1	-1	-1	-1	-1	-1	0.720111	-1	-0.60927	1.2619	-0.0437544	-1	-1	-1	-1	-1	-0.692925	-0.685759	-1	-1	-0.381477	-1	-1	-1	-1	-1	1.61079	2.57962	1.56846	3.28872	3.65721	4.3532	4.68811	4.71158	3.41111	2.93829	2.91812	1.01704
Iso_D.7605.3	0.765592	2.41901	2.83778	3.51365	2.27343	1.91602	1.5545	1.89602	1.61632	0.338366	2.50945	1.13447	2.34705	2.2016	4.22399	4.6825	5.33292	3.91225	4.21169	3.13061	2.61748	0.763958	0.531219	1.52281	1.04608	0.468537	1.08699	0.491353	4.21938	2.46085	2.42894	-0.205379	2.172	2.27839	1.24224	0.0801871	1.74686	1.20653
Iso_D.7605.5	2.15855	-1	3.24658	0.624528	-0.911279	0.819744	1.53488	2.29161	1.72416	2.15431	0.654322	1.33981	1.61955	3.05122	2.51047	-0.283481	2.5239	1.57113	2.2946	1.06595	0.825037	1.18746	0.478076	1.3078	0.738797	-1	0.616222	0.0218808	1.44942	-0.0530639	-0.33292	-1	0.932539	1.28272	-0.221527	-1	-0.3621	0.0919577
Iso_D.7606.2	-1	1.78052	-1	4.19657	-0.810671	-0.235647	-1	-1	1.60604	-0.397527	0.18613	0.910518	-0.0948112	-1	1.57322	1.00313	4.43669	2.54656	2.96128	1.27393	1.09295	0.34565	0.181357	-0.237073	0.0270139	0.10496	0.468167	-1	2.27117	0.995159	0.929701	0.396091	2.75842	-1	0.574495	-1	0.333318	0.201506
Iso_D.763.5	2.10977	1.76844	-1	0.781542	0.96	0.696736	0.173132	0.700471	1.33247	0.740626	0.805112	0.630709	1.33842	1.40699	1.14513	1.61643	1.69618	1.5199	0.359437	1.41338	1.06169	0.536555	0.240094	0.318564	0.998966	0.124213	0.306079	0.866557	0.963016	0.857428	0.552741	-0.365301	-0.139509	-0.0260592	-0.264838	-1	-0.523177	-0.365521
Iso_D.764.1	1.31465	-1	0.980286	-1	0.671112	0.189818	-0.286876	0.167351	1.01649	1.83756	0.449216	0.438326	1.99222	0.789623	-0.799398	0.859866	0.186641	0.193405	0.0941423	0.372572	0.279827	-0.0902395	-0.578772	0.44208	0.316101	-0.232205	-0.143044	-1	0.591011	-0.528835	-0.123453	-0.840294	-0.558566	-0.0260592	-0.00225441	-0.548526	-0.387237	-0.426351
Iso_D.7693.1	-1	2.62769	-1	-1	-1	-1	-1	-1	1.56156	-1	-1	-1	-1	-1	-1	-1	-1	-1	-1	-0.0631833	-1	-1	-1	-0.318079	-1	-1	0.0142534	2.07624	2.3245	3.49696	2.4313	3.89378	4.10554	3.44255	2.58548	2.95386	2.32609	-0.252209
Iso_D.7792.1	5.78078	6.07219	6.33838	6.1468	5.14932	4.7947	5.6064	5.79884	6.12247	5.75725	6.22964	6.05689	6.21892	6.26776	6.44823	5.95545	6.45786	6.24412	5.70746	6.66884	6.32366	5.74264	5.14225	5.4825	5.59232	5.37298	4.54613	5.73961	5.73121	5.67192	5.67654	4.9314	5.5438	5.04269	4.00217	4.41056	5.15651	5.28193
Iso_D.7842.3	3.25998	1.5761	2.11196	2.34975	2.26453	1.63016	2.58962	2.89706	2.7629	2.19466	2.31256	2.56243	3.05359	2.50563	4.07689	2.73022	2.54273	2.24452	2.83563	2.24924	2.30967	2.53912	1.19656	1.87428	0.876759	0.668179	1.14644	1.54764	2.13775	2.03	1.69733	1.08588	1.96963	2.42977	0.401166	0.946454	2.14807	1.80273
Iso_D.7900.2	3.04464	2.2916	2.88022	0.988884	1.17507	0.116749	0.576585	1.07246	0.61334	2.88807	2.87003	3.90657	3.04663	0.588683	-0.185378	0.0247545	-1	-0.247539	1.25885	2.42347	1.57644	0.469922	-0.696952	-0.241247	0.486284	-0.332164	0.297144	0.10669	0.249685	3.33861	1.64878	3.60281	3.25969	3.00836	2.18683	2.00189	1.81956	0.80136
Iso_D.7929.1	3.74309	4.33257	5.84426	4.50419	3.39458	3.52869	3.80765	4.31849	4.4837	5.07822	3.97981	3.42124	4.38308	3.56671	4.72383	4.81222	5.32782	4.9841	4.5594	4.08091	4.09717	3.25564	4.14338	4.40564	4.30202	4.19194	3.3501	4.56371	3.35625	3.26538	2.93599	4.45959	3.16428	2.99962	4.02198	2.89389	2.78236	2.7006
Iso_D.80.1	1.93674	2.29456	-1	-1	1.67111	0.743065	-0.118176	2.63351	1.06317	-0.142676	2.0996	1.88301	1.91492	1.6894	0.732126	1.0633	0.785087	1.47912	-1	0.570327	1.33563	0.112559	0.132679	-1	-1	-0.155006	-0.792826	-0.403545	-1	0.0208344	-0.0373419	0.414528	0.152124	-0.108014	-1	0.693203	-0.0932725	-0.0946588
Iso_D.8041.1	5.23033	5.86308	4.96328	6.00873	5.68186	4.9565	4.35269	5.9609	5.32002	5.89408	4.093	4.7044	5.4147	5.30112	5.09348	5.30013	5.17454	4.77255	4.97668	4.70693	4.83837	4.6069	3.60524	4.36694	4.11839	4.68775	3.22521	4.73214	4.69037	4.51614	3.92606	4.47959	5.72257	5.79229	4.79654	5.46754	6.65799	6.42196
Iso_D.8044.1	-1	-1	5.66962	-1	-1	1.98904	-1	5.79948	-1	-1	-1	0.993903	1.91719	-1	-1	-1	-1	-1	-1	-1	2.11458	-1	-1	-1	-1	-1	-1	0.684846	-1	-1	0.297966	-1	-1	-1	-1	-1	-0.744955	-1
Iso_D.8072.6	1.14338	1.51149	-1	-1	1.36612	1.99636	2.31683	2.22802	1.42295	2.77436	1.3656	1.55902	2.38518	1.24316	2.66625	1.60966	0.830203	1.55185	3.16279	1.62442	3.44526	2.47338	1.45169	3.58161	2.40238	2.32657	2.23473	3.35853	2.85282	3.78097	3.66419	4.07364	3.97319	3.55718	3.67492	3.89571	4.14555	4.31034
Iso_D.8087.1	2.96206	-1	4.69923	1.85325	2.38903	2.23202	2.90373	3.14217	3.09335	3.23506	1.53593	2.44866	2.29672	1.82056	1.42195	1.70621	0.0891815	1.64756	2.36654	0.319124	2.25152	0.458489	1.65096	0.655724	0.939419	0.884876	0.637117	0.0163415	0.722483	1.13152	0.949521	-0.0740457	1.01924	0.891758	2.2316	-1	0.223113	0.435172
Iso_D.8191.2	3.80936	4.74059	5.47049	5.14827	4.3397	3.59118	3.7143	4.55686	4.29509	5.82097	3.27917	3.40823	3.15959	4.03861	3.75571	3.91783	4.99848	4.19483	3.9798	3.68297	4.0735	3.72225	3.61274	3.56529	4.17996	3.47788	3.01118	4.09859	3.64475	4.04173	3.60615	4.25341	4.57946	4.12263	3.62722	4.82888	4.85257	5.02169
Iso_D.8242.4	-1	-1	1.86682	-1	-1	-1	-1	-1	-1	-1	-1	-1	-1	-1	-1	-1	-0.763737	-1	-1	-1	-1	-1	-1	-0.883026	-1	-1	-1	0.135964	-0.712239	-0.0954963	0.165725	0.552273	1.39927	1.20668	-0.59482	0.0537009	0.207286	-0.760228
Iso_D.8325.2	-0.149989	-1	-1	-1	3.64861	-0.575175	-0.602954	0.420302	-0.861001	0.585528	-0.527983	-0.220168	0.221907	-0.649522	-0.614854	0.0188609	-0.443239	-0.143818	-0.924589	-0.375845	-0.36743	0.251572	0.113595	-0.0495027	-0.164959	-0.108618	0.532932	0.5742	0.491331	0.871557	1.11704	1.70879	1.45596	1.65909	0.657536	0.168237	1.4802	1.67606
Iso_D.8344.1	9.85446	10.6069	15.7298	11.2595	11.5843	9.88901	10.216	10.2667	9.93515	13.0413	10.8314	9.95033	10.8034	13.6729	11.3351	10.7449	11.1569	10.6525	11.2369	11.101	10.7554	10.2145	11.0239	11.7332	11.7567	12.0436	13.4493	11.3607	10.2254	10.6063	10.5277	10.977	10.6401	10.9071	11.2543	12.4214	11.0993	11.9281
Iso_D.8357.1	1.67956	2.41608	2.68942	2.71472	1.14887	1.76558	2.13006	2.06936	2.57735	3.48731	1.7134	2.69368	2.34478	2.22594	2.54292	1.7253	2.53032	2.37336	1.88061	2.52568	1.94648	1.88204	1.34686	0.931367	1.27609	1.32302	1.18152	1.74046	1.70248	1.41673	1.40173	1.53618	1.66943	2.12502	0.842472	0.868839	2.15725	1.96689
Iso_D.8368.1	-1	-1	-1	-1	-1	-1	-1	-1	0.854724	-1	-1	-1	-1	-1	-1	-1	-1	-1	-1	-1	-1	-1	-1	-1	-0.378153	-1	1.01386	0.300679	-1	0.0616638	-0.152189	2.15479	2.39271	2.23419	1.72192	1.66966	1.16058	-1
Iso_D.8371.1	-1	-1	-1	-1	-0.0535004	-0.505434	-1	-1	-0.343338	-1	-1	-1	-1	-1	-1	-1	-1	-1	-1	-1	-1	-1	-1	-1	-1	-1	-1	-0.565359	-0.948533	0.715124	-0.657009	0.258568	0.535377	0.886511	-0.486706	0.12733	-0.26086	-0.760841
Iso_D.8372.1	-1	-1	-1	-1	-0.452417	-0.657494	-1	-1	-1	-1	-1	-0.178624	-0.411176	-1	-1	-1	-1	-1	-1	-1	-1	-0.885651	-1	-1	-0.837405	-1	-1	-0.551698	-0.732904	0.212262	-0.233378	0.575551	0.820339	0.634518	-0.600421	-0.0412372	-0.354793	-0.674197
Iso_D.8400.1	-1	-1	-1	-1	-1	-0.91643	-1	-1	-1	-1	-1	-0.0436033	0.0122557	-1	-0.926166	-1	-1	-1	-1	-1	-1	-0.819091	-1	-1	-1	-0.467171	-0.638884	-0.860625	-1	-1	-0.618956	-0.116774	-0.419651	-0.301739	-0.656157	-0.325469	-0.421156	-0.537454
Iso_D.8408.1	-1	-1	-1	-1	-1	-1	-1	-1	-1	-1	-1	-1	-1	-1	-1	-1	-1	-1	0.131126	0.864219	-1	-1	-0.147576	-0.715983	-1	-1	-1	-0.557445	-1	-1	-1	-1	-1	-1	-1	-1	-1	-1
Iso_D.8473.1	-1	-1	-1	2.6256	2.06691	2.3631	1.98372	2.49462	2.03918	1.68197	1.88859	1.7746	1.30914	1.98335	1.4185	3.01182	2.08186	1.15098	0.283705	1.5024	0.603167	0.796063	1.47246	1.32459	1.00278	0.776702	0.534836	1.80314	2.13737	1.37916	1.72034	1.62071	1.73754	1.03448	1.30457	1.39479	1.19609	1.94924
Iso_D.8474.2	1.77745	2.86729	4.85996	2.11179	2.29109	2.17009	1.59024	1.98448	2.52564	3.38101	2.42008	0.771424	2.71085	2.74534	3.14472	2.18334	0.95155	1.82662	2.61199	2.68128	2.00818	2.09395	1.77381	2.23051	2.5318	2.19656	1.4507	2.29474	2.04482	2.43356	1.76256	2.18119	2.34787	2.33117	2.8683	3.54505	3.07355	3.41426
Iso_D.8487.4	4.7103	5.57113	6.03965	4.94615	4.25124	4.19252	4.51574	4.66162	4.68026	4.1529	4.62309	4.86425	4.41951	5.42605	5.81296	5.02105	4.78425	4.11686	4.39925	4.5697	4.96099	4.28085	4.5136	4.57475	4.73103	4.34035	4.50639	5.00779	4.19272	4.24104	4.0147	4.35811	4.93455	4.59557	6.30083	5.11828	5.03338	4.9913
Iso_D.8499.1	4.97975	4.53088	5.29003	5.00925	5.07523	4.94386	6.0685	5.99056	7.01096	6.45687	5.94558	5.67592	5.52171	4.6973	5.80522	5.89642	5.6643	6.26967	6.42221	6.36597	5.42629	5.2812	4.49625	5.64291	5.51313	5.37914	5.58047	6.71201	6.43667	5.53068	5.66011	6.00543	6.59663	6.49283	6.58846	5.89016	7.65724	7.66691
Iso_D.8533.5	2.56076	2.3978	1.33495	2.56027	1.35589	1.30466	2.31634	1.58928	2.18214	1.73107	2.42785	1.89492	1.94163	2.16461	1.31245	2.01848	1.79142	0.642917	1.33609	0.975986	1.35052	1.0108	1.06274	0.570742	0.481599	0.988683	-0.289116	0.222605	1.0329	1.12347	1.17672	0.54382	1.50913	2.07571	-1	1.13299	0.675166	-0.0807469
Iso_D.8577.1	2.05235	3.01697	3.88821	3.07856	4.42686	1.7808	2.30946	2.22617	1.64011	1.28997	1.61232	1.3952	1.69144	1.42241	2.41538	2.73942	5.04584	2.50617	3.32322	1.32835	2.05137	2.3834	2.13393	2.6319	3.15138	2.73026	1.96381	3.11974	1.99049	2.71284	2.28524	3.50886	3.4238	3.68856	3.63693	3.61799	4.18399	4.51258
Iso_D.8639.1	0.551644	1.004	1.54325	0.848808	-0.611629	1.18016	0.589427	0.444933	1.13085	1.4059	1.00666	0.397266	0.121902	0.752996	1.38247	1.35044	-0.146447	1.36139	1.70924	0.936627	0.814456	0.241307	0.0250575	1.34787	0.964523	0.521072	-0.313128	0.521658	0.735004	0.904715	0.205884	1.28107	0.687571	0.645891	0.825173	0.644848	0.697824	1.20424
Iso_D.8640.1	-1	-1	-1	-1	-0.985022	-1	-1	-1	-1	-1	-1	-1	-1	-1	-0.874552	-1	-1	-1	-1	-0.110481	-0.785436	-0.87531	-1	-1	-1	-0.768883	4.25496	3.72123	2.31136	5.2234	3.51752	6.12754	5.81412	5.83938	5.28592	5.63497	4.44315	2.7632
Iso_D.8721.2	2.46131	3.82512	4.24641	3.50603	2.95552	2.01926	2.17141	2.42812	3.10304	2.05035	2.63118	2.07965	1.97635	2.90038	2.51952	1.79849	2.81277	2.52238	2.46009	1.96706	1.96504	1.80208	2.28151	2.41554	2.64732	2.39792	1.68615	2.11702	2.22004	2.19219	2.22528	1.55305	2.79581	3.07093	1.84203	3.28149	2.79021	2.71008
Iso_D.875.1	2.93349	4.75451	3.78094	3.64502	5.47312	3.05887	2.9253	3.16841	3.68089	3.82511	3.23432	3.75498	3.41578	3.44254	2.54282	3.60956	3.39204	2.09808	3.43373	2.71249	3.83445	2.68126	2.25125	3.84124	3.45654	3.56691	2.81518	4.108	3.39531	4.0674	3.75067	4.00063	3.88877	3.68032	3.43327	2.60492	4.9526	4.88224
Iso_D.8787.1	0.221144	2.21	2.93355	6.44853	-0.111724	0.126667	1.60217	2.36933	1.18495	2.26017	1.26997	1.66375	2.52403	2.33573	1.80789	3.0371	1.97256	2.69968	2.56775	3.21014	2.6763	3.1035	2.28119	2.46708	3.10778	2.74407	3.48724	4.20695	3.2327	3.29336	3.37071	3.21113	4.45955	4.67232	3.87745	2.26167	5.03803	4.98828
Iso_D.8791.1	2.27088	3.37726	-1	-1	0.89335	1.51027	1.59027	-1	1.11991	-0.138681	2.10732	0.838273	1.09346	0.780594	0.497963	2.03177	1.83895	1.5603	2.00595	0.988426	1.45451	1.56546	1.91318	1.66626	3.1464	1.56005	2.12696	2.15184	2.41971	3.50615	2.18704	2.59816	2.93337	3.37784	2.81822	2.85916	3.23801	2.81762
Iso_D.8792.1	-1	1.86004	-1	-1	-0.953165	2.1927	0.889782	1.98805	1.05933	0.87215	2.05132	2.53165	2.47562	1.87422	-1	0.181378	1.16941	2.29449	2.07874	2.16037	1.84635	2.54975	1.6572	1.57305	1.27144	2.00566	2.30905	3.0661	2.4587	2.96546	1.96016	3.05036	3.4506	2.60372	3.8069	2.62031	3.62427	3.06725
Iso_D.8860.1	-1	-1	-1	-1	-1	-1	-1	-1	-1	-1	-1	-1	-1	-0.827563	-1	-1	-1	-1	-1	-1	-1	-1	-1	-1	-1	-0.809434	1.5457	1.98166	0.507944	3.8255	2.72363	4.35789	4.28365	4.39565	3.13023	2.86528	2.72559	0.518149
Iso_D.8863.4	-1	1.42352	-1	0.103446	-1	-0.571453	-1	-1	-0.13186	-1	0.0473501	-1	-1	-1	-1	-1	-1	-1	-1	-1	-0.0654503	-1	-1	-1	-0.478177	-0.451142	3.40016	2.49384	0.535285	2.38548	2.47167	3.7023	4.53803	4.9042	3.95319	3.30409	3.28366	1.66016
Iso_D.8960.1	5.05818	5.64552	6.79146	5.97321	4.26306	4.45776	5.10614	4.86023	4.92343	5.02994	4.87184	4.17546	4.90717	6.3867	5.60246	5.4797	5.53628	4.70464	5.00609	5.10434	4.56348	4.76226	5.47117	6.07609	5.92156	5.68651	5.15204	5.03962	4.57785	4.39454	4.24132	4.74504	5.11467	4.7138	4.77	5.7841	4.92033	5.1065
Iso_D.9009.1	0.390479	-1	-1	-1	-1	-1	-1	0.277358	1.3481	-1	-1	-1	-0.487305	-1	-1	0.816246	-1	-1	-1	0.00393986	-1	-0.627941	-1	-1	-1	-1	-1	-1	-1	-1	-1	-1	-1	-1	-1	-1	-1	-1
Iso_D.9039.1	3.25555	-1	-1	-1	-0.357588	0.997428	3.95406	-1	2.55263	-1	-1	2.06242	-1	-1	-1	-1	-1	-1	-1	2.36582	0.298146	-1	-1	-1	2.2471	-1	-0.356851	-1	-1	-1	-1	-1	2.51985	-1	-1	-1	-1	-1
Iso_D.9041.1	11.7717	11.9516	9.50108	11.4716	11.8191	12.0567	12.6984	12.3808	12.5317	11.8418	11.3177	11.9674	10.7488	13.1625	10.3301	9.45612	12.0746	10.7186	9.81466	10.0732	10.0329	9.33282	10.5359	10.4459	10.0969	10.4681	11.2471	9.62023	10.5977	7.21748	10.472	7.7327	9.92232	7.55404	8.41203	8.21619	9.29935	10.0555
Iso_D.9070.1	-1	-1	-1	-1	-0.984847	-1	-0.559126	0.62178	-1	-0.608778	-1	-1	-1	-1	-1	-1	-1	-1	-1	-0.63544	-1	-1	-1	-1	-1	-1	-1	-1	-1	-1	-1	-0.778279	-1	-1	-1	-1	-1	-1
Iso_D.9099.1	2.36237	0.931779	0.8001	1.36042	-0.206568	1.17227	1.28609	1.51938	1.88313	1.44704	1.95137	1.23488	0.744559	1.92851	2.38489	2.08507	2.38843	1.17031	-1	0.952187	1.64277	0.423494	1.7362	2.21601	1.13082	0.878517	-0.178404	0.331702	1.04893	0.470869	1.02877	0.961982	1.89281	0.342652	-0.640342	-0.301589	-0.452428	0.277897
Iso_D.9125.1	4.41992	3.54309	4.28647	3.77454	0.856882	1.60979	1.85155	2.87029	3.01471	1.0175	2.06826	1.58797	-1	2.19248	0.973361	2.19789	4.75078	3.8424	1.037	1.17673	-1	0.822096	1.60969	0.692277	1.07671	1.30268	1.35902	1.00235	0.378389	-0.623576	-1	-0.199284	-1	0.722109	-1	-1	-0.650989	0.58563
Iso_D.9125.3	5.32375	3.60852	2.95339	6.25456	4.1403	4.4964	5.16199	5.54502	6.49881	3.79815	3.52146	3.28954	2.73346	4.25019	5.54484	6.33631	7.18366	6.53765	4.72137	5.53799	4.82444	2.75801	5.16174	3.63353	4.11014	3.22016	4.34612	3.787	3.57762	0.903343	3.01633	3.31629	1.24431	1.51351	2.22789	0.816529	2.86151	2.28323
Iso_D.9180.1	-1	-1	-1	-1	-1	0.563079	-1	-1	-1	-1	-1	-1	-1	-1	-1	-1	-1	-1	-1	-1	-1	-1	-1	-1	-1	-1	-1	-1	-1	-1	-1	-1	-1	-1	-1	-1	-1	-1
Iso_D.9184.1	0.343722	-1	-1	-1	-0.97418	-0.762267	0.206881	0.0668712	-1	0.429449	0.039513	-0.141317	-0.45737	-1	-0.22692	1.42922	-1	-0.279865	-0.34365	-0.50008	0.754662	-0.560275	-0.600233	0.92706	0.509024	0.320225	-0.692328	-0.484427	-1	-0.595269	-0.0810162	-0.603046	-0.611459	-0.650241	-0.508278	-1	-0.834304	-0.339543
Iso_D.9193.1	-1	-1	-1	-1	-1	-0.4645	-1	-1	1.32495	-1	-1	-0.647541	-0.130195	-1	4.56532	-1	-1	-1	-0.145259	-0.634689	-1	-1	-1	-1	-1	-1	-1	-1	-0.71308	-1	-1	-1	-1	-1	-1	-1	-1	-1
Iso_D.921.1	2.21636	2.0738	2.58318	-0.301791	0.778967	2.20752	2.52859	2.69482	3.04458	2.90426	1.72786	1.4135	1.34323	2.09945	2.47068	-0.209508	2.11777	1.55768	1.34226	1.48309	1.94529	1.45698	1.35788	1.93555	1.61347	0.80963	0.750374	1.83246	1.95162	0.34261	2.51686	1.28289	1.84855	2.74721	0.68196	0.931167	2.24352	1.94236
Iso_D.9235.1	0.670346	0.803214	1.71466	1.10405	-0.0163739	0.942563	0.308948	0.744899	1.01255	0.84672	1.24748	0.197572	0.826624	0.815802	-0.477682	-0.15301	-0.200883	-0.10872	-0.826707	-0.27732	-0.242892	-0.822926	0.705232	-0.566813	-0.201679	-0.533487	-0.607202	-0.194614	-0.257504	-1	-0.362417	-0.373394	-1	-0.616148	-0.463219	-1	-0.816608	-0.359396
Iso_D.9239.1	3.79313	4.23438	3.68292	2.75154	2.38537	2.54188	2.2743	1.69307	2.79829	2.9463	2.5233	2.29003	2.97405	2.81217	4.57798	2.9089	3.47399	2.25823	1.40149	1.4114	2.64226	1.11886	1.30697	1.58016	1.84872	0.431749	1.1482	1.03705	0.978746	1.1853	1.43719	0.974374	1.35674	1.38106	-1	1.23797	0.761865	0.776685
Iso_D.9255.1	0.976589	-1	-1	-1	-0.564414	-0.444894	0.441035	-0.375207	0.454975	1.22474	-0.565904	-0.207169	0.846586	0.928945	-0.24628	1.70031	2.8059	0.984331	0.86098	0.803718	1.71943	1.48195	-0.29031	1.24807	1.83487	2.25356	1.82611	3.09631	2.17859	2.76951	2.13319	3.87707	3.98178	4.40519	5.29794	6.12882	6.26176	6.49246
Iso_D.9256.1	3.36899	3.8407	5.70375	4.01619	3.17714	3.57065	3.66599	4.06441	4.16871	4.2054	3.76681	3.71826	3.75749	3.66189	5.87052	4.96101	4.06987	4.85851	5.11129	5.01399	4.9409	3.86759	3.30324	4.22859	4.56506	4.26729	3.27981	4.24222	3.51444	3.69318	3.08392	3.79739	3.72405	3.40687	3.57695	4.44193	4.14335	4.5218
Iso_D.9263.1	0.796955	-1	-1	-1	-0.962949	-1	-1	-1	-1	-1	1.15019	-0.230958	-1	-0.119322	-0.184919	0.734693	-1	-1	-1	-1	-1	-0.846578	-0.703054	-1	-1	-1	-1	-1	-1	-1	-1	-1	-1	-0.516974	-1	-1	-0.950116	-0.589757
Iso_D.9297.1	-1	-1	-1	-1	-1	-1	1.67094	-1	-1	-1	-0.112259	-0.275398	-0.307608	-1	-1	-0.399824	0.655276	-1	-1	-0.191828	-0.384622	-1	-1	-1	-1	-1	-1	-1	-1	1.13968	-1	-1	-1	-1	-1	-1	-1	-1
Iso_D.9332.1	-1	-1	-1	0.0455134	0.369541	-1	-0.832702	-1	-1	-1	-1	-1	-0.510161	-1	-0.0155214	-0.0327663	-1	-0.256392	-1	-0.475657	-1	-0.811888	0.576535	0.0084155	-0.507911	-1	-1	-1	-1	-0.568115	-1	-1	-1	-1	-0.208465	-1	-1	-1
Iso_D.9409.1_truncated_curated	1.40832	-1	-1	-1	1.50554	-0.00898784	1.60252	1.23772	-1	-1	1.36996	0.157484	0.441625	-0.562244	-1	0.921811	-1	-0.264223	-1	-1	-0.013662	-1	0.144585	-0.652694	-1	-1	-0.599467	0.48353	-0.375287	-1	-0.277612	-1	-1	-1	-1	-1	-0.909937	-1
Iso_D.9475.1	4.39431	-1	-1	3.08841	3.36106	0.804962	1.96599	0.65935	1.39372	1.30235	-1	0.409837	2.79592	3.03496	0.53262	-1	-1	1.44805	-1	-1	-1	-1	0.539148	-1	-1	1.02632	-1	-1	-1	-1	-1	-1	-1	-1	-1	-1	-1	-1
Iso_D.9496.1	0.730454	-1	-1	-1	-1	-1	-1	-1	-0.455683	-0.359928	-0.388955	-0.576477	0.419206	-1	-0.0680243	0.404611	-1	-0.218414	-1	-1	-1	-0.884857	-0.717462	-1	0.420269	-0.412513	-1	-1	-1	-1	-1	-1	-1	-1	-1	-1	-0.893145	-1
Iso_D.9524.1	3.11357	-1	-1	0.956298	-1	0.657999	1.49298	1.32424	2.83796	2.53639	0.784039	1.55051	1.64906	2.80379	-1	-1	2.90383	2.2109	2.89059	0.505443	1.5405	0.689118	0.990999	1.97689	-1	1.33975	1.33796	1.16882	-1	1.00563	0.313103	-1	-1	0.581169	-1	-1	-0.122172	-1
Iso_D.954.1	-1	-1	-1	2.70604	3.76021	-1	3.37214	1.50431	1.48415	-1	3.35565	3.82782	3.64276	3.87723	3.30714	0.570598	1.4997	2.35577	-0.724463	2.67207	1.99384	5.07801	2.0402	1.84808	1.91485	1.04035	-0.000662261	0.280257	0.245166	-0.0185831	-1	-0.465027	-1	-1	-0.539096	0.328183	-0.397899	0.66503
Iso_D.9601.1	0.234679	0.816615	2.56187	-0.655768	3.07367	-0.165932	0.122135	0.215728	-0.150849	-0.0285488	-0.704051	-0.239312	0.992598	0.739103	0.486146	0.999057	-0.409045	-0.464999	1.58457	0.139796	0.604974	0.844867	0.171603	0.729127	1.2485	1.30202	1.13966	1.67402	1.128	1.28683	1.44875	1.83127	2.012	2.56079	1.16066	1.6048	2.30027	2.43289
Iso_D.9618.1	-1	0.939581	-1	1.33488	-1	0.778352	0.0838634	0.54462	0.556537	0.0626354	-1	0.196157	0.835458	-0.155594	-1	-1	-1	-1	-1	-0.386151	-1	-1	-1	-1	0.05534	-1	-1	-1	-1	-1	-1	-1	-1	-1	-1	-1	-1	-1
Iso_D.968.1	6.63833	7.80965	7.63318	6.94326	7.61545	7.76426	8.59565	8.2732	9.09559	8.59652	7.82711	7.17275	7.56235	8.13156	7.71506	8.34072	7.80232	8.89593	8.90158	8.45455	8.05045	7.31305	6.97322	7.84322	7.99354	8.70489	8.93725	8.72215	7.49635	6.93588	6.82086	7.65618	7.53108	8.07168	7.72679	8.44192	8.19371	8.72404
Iso_D.9683.2	4.53964	4.60112	3.6765	4.59386	4.98583	2.41836	1.77895	5.13636	1.03645	2.5593	2.38171	3.20271	3.12652	4.4084	1.94129	5.39929	4.5857	3.71532	-1	1.25313	4.55234	2.19253	4.29013	3.30306	5.37747	3.68092	0.135664	-0.530841	0.525425	2.43784	2.59658	4.15622	3.43848	4.34229	5.13822	4.61352	4.00584	4.54514
Iso_D.9690.1	1.31606	0.617732	-1	0.779619	2.2004	0.29636	1.30076	1.74316	1.82462	1.86567	0.92542	0.572793	1.39847	1.86419	2.18645	1.61755	1.39009	0.900298	0.851546	1.53764	1.38886	1.39335	1.18735	2.65628	2.68318	1.99244	2.1823	2.7056	2.40755	2.45534	2.48912	3.46614	2.58278	2.72675	5.13067	4.05159	3.92713	4.24393
Iso_D.9696.2	3.14754	-1	-1	1.29962	1.01008	3.54268	3.73831	3.78197	4.3199	4.38278	2.56571	2.22529	3.27059	2.20702	1.02291	1.33424	4.68364	5.6125	2.00192	0.182026	1.71841	0.79802	2.74917	0.351111	1.55118	2.63524	1.69565	1.84977	3.66237	2.38594	0.182658	1.81124	1.15043	1.95991	-0.463307	1.30275	0.249442	0.715161
Iso_D.9712.1	4.32434	4.43125	3.99271	2.80207	1.71855	1.18864	1.84844	1.58641	2.95217	2.67215	3.02516	3.33366	3.3408	2.97638	2.05563	2.75296	1.81625	1.93285	3.48178	2.37219	2.05964	1.70746	1.38168	1.71733	2.18076	1.27949	1.72196	1.46103	2.52155	1.60647	1.56035	0.0973586	1.33264	1.02729	0.18155	-0.0527119	0.366303	0.820992
Iso_D.9741.2	3.07293	4.39905	3.78809	4.65078	3.89852	3.60533	3.61771	3.79141	4.37206	3.97647	3.28464	3.97717	3.63985	3.63556	1.66241	2.00413	1.59446	0.977327	0.527354	1.17429	1.25858	1.07932	3.05138	1.10958	0.932412	-0.324834	-1	1.39406	2.37139	0.683468	2.46692	-0.0704485	1.5508	1.92179	1.64742	-1	2.18562	0.385101
Iso_D.9742.1	1.90723	-1	-1	3.4372	2.46285	2.34571	0.984366	1.83904	3.35097	1.89596	1.06434	3.37549	3.71504	2.30867	2.63696	2.09068	1.38085	0.910187	0.805373	0.0316121	0.330194	-0.253316	1.24727	-1	-0.238272	0.322524	0.103829	-0.295768	2.58379	1.31666	1.87918	0.810732	0.251943	-1	-0.275403	-1	0.441777	-0.160324
Iso_D.9769.1	2.82392	4.1754	4.07586	3.80653	2.78255	2.9006	2.93145	3.24915	4.27744	3.13544	3.74569	2.62679	1.78945	3.40234	3.35079	2.43338	3.4747	2.99974	2.65023	2.73993	2.34978	1.88269	2.09253	2.6707	2.24546	1.60263	1.95959	1.29931	3.25975	1.97007	2.54061	0.718714	1.03231	0.771291	-1	0.821412	-0.461987	0.618931
Iso_D.9799.1	0.874492	-1	1.21601	-1	-0.439779	-0.569676	-1	-1	0.562901	0.8643	-1	-1	0.359589	-0.116411	-0.590398	0.0528627	-1	-0.141751	-0.608017	-0.584741	1.09321	-0.0150998	0.278427	-1	-0.501558	-0.81583	-0.889705	-0.789491	-0.0925576	-0.795551	0.550715	-0.0841093	-1	-1	-0.757439	-0.509852	-0.45486	-1
Iso_D.9808.2	1.18084	-0.221017	-0.0636101	-1	-1	0.646347	-0.289104	-1	-1	0.759631	-0.461051	0.791643	0.969134	1.13073	-1	-1	-1	-1	-1	0.442227	-1	-0.098378	0.244128	-0.719114	-1	-1	-1	-1	-1	-0.725128	-1	-1	0.106626	0.957494	-1	-1	-0.675735	0.417724
Iso_D.982.1	7.29513	8.17486	8.21014	8.68994	7.8438	7.63617	8.01866	8.28558	8.60305	8.42271	8.05242	8.09615	8.14528	8.59171	7.61159	7.82599	8.82646	8.00477	7.99793	7.82261	7.78404	7.70347	8.30965	8.61156	8.712	8.69525	8.32157	8.58823	8.24723	8.16151	8.26183	8.12408	8.3659	8.23853	8.47194	8.39849	8.64528	8.9019
Iso_D.9845.1	3.17001	1.82924	-1	-1	-1	-1	-0.498847	-1	0.707482	2.42105	-1	-0.17568	-1	-1	-1	-1	1.6603	1.93799	0.504208	-1	-1	0.358849	0.372644	-1	-1	-1	-1	-1	-1	-1	0.322678	-1	-1	-1	-1	-1	-1	-1
Iso_D.9857.1	1.83526	-1	-1	0.849171	-1	0.382579	0.255153	-1	-1	1.19547	-1	-1	-1	-1	-1	-1	-1	-1	-1	-1	-1	-1	0.907284	-1	-1	-1	-1	-1	-1	-1	-1	1.04853	-1	-1	-1	-1	0.558043	0.942925
Iso_D.987.1	2.66669	5.22148	4.78904	7.73444	3.11113	4.16372	3.42165	4.59591	7.75236	5.24484	2.70024	1.39875	3.52471	-1	4.96467	3.97442	4.40365	5.31173	6.26856	3.62166	2.96065	2.04258	1.90275	3.23852	4.24385	5.08268	6.45472	6.57922	4.50081	-0.126814	0.768887	2.75613	3.06429	3.75065	2.54626	3.2527	2.62145	2.3915
Iso_D.9898.1	1.03926	1.9915	1.39053	0.639609	0.0323166	-0.289596	0.565575	-1	-1	-0.603862	-1	-1	-1	1.15985	2.05536	-1	-0.662398	-1	-0.81563	0.209142	-1	-0.646283	-0.609367	0.48592	0.402313	-1	-1	-1	-0.0368296	-1	-0.62503	-0.701947	0.722327	0.5198	-0.688455	-0.227337	0.0372268	-0.142803
Iso_D.9899.1	3.18117	4.36187	4.90655	3.96324	3.44987	2.49714	2.88219	3.47296	4.08852	1.93584	2.70206	3.93319	3.30433	3.65416	2.55211	3.09219	2.59258	2.56477	1.16133	1.38715	0.94151	1.78296	2.2123	1.90506	2.66101	1.27334	-0.505779	0.67541	2.12442	0.208908	0.643154	1.38089	1.70584	2.52564	0.888789	1.08704	1.3037	0.808071
Iso_D.9967.1	1.05851	2.01611	1.71441	1.54945	0.137863	-0.0748156	1.64794	-0.644954	-1	-1	0.609966	0.600452	1.23517	1.06423	-0.853706	0.740716	-1	-1	-1	0.498167	-0.263128	-1	-0.717547	-1	1.04745	-1	-1	-1	-1	-0.0904201	-0.577774	-1	-1	-1	-1	-1	-0.158824	-0.772036
Iso_D.9971.2	-0.700366	-1	-1	-1	-1	-0.855924	-1	-0.870446	-0.143547	0.317297	0.116123	-0.191715	-0.244901	-1	-0.447691	-1	-0.341629	-0.689282	-0.71853	-1	-1	-0.965347	-0.528492	-1	-1	-1	-1	-1	-1	-1	-1	-1	-1	-0.835577	-1	-1	-0.978364	-0.839852
Iso_D.9973.1	1.02677	2.31324	2.60972	1.30083	1.77114	0.647105	0.521427	1.00749	2.25984	0.907385	0.735354	0.238545	-0.0561359	0.99701	1.3379	2.58035	1.30219	0.601854	-0.0665879	0.613653	-1	0.217262	0.313276	0.612538	-0.194049	-0.492387	-0.864389	-0.751129	0.125351	-0.364145	-0.588349	-1	-0.342933	-1	1.0574	-1	-0.465125	-1
Iso_D.9974.1	-0.0189061	0.858189	2.15705	3.10394	0.108113	0.266358	1.25627	0.846815	1.91682	1.4582	0.204307	0.190714	0.879358	-1	-0.140529	0.397408	0.97207	0.307325	-0.467208	0.0396477	-1	0.0465478	0.022496	-0.652491	0.745294	-1	-1	-0.546018	-1	1.12139	-1	-0.602312	-1	-1	-1	-1	-0.502159	-0.631196
Iso_D.9987.1	1.93999	2.13544	-1	5.61428	1.92013	1.26671	0.743382	0.542132	-1	-0.00516587	-1	-0.0203016	-0.554274	1.58231	1.0051	0.808773	0.892216	-0.764065	-0.596618	-0.345115	1.00208	-0.00983057	0.37943	-0.0890513	0.1352	-0.741796	-0.0571215	-0.702325	0.033204	-0.75689	-0.287249	-1	-0.103276	-0.609384	-0.749892	-0.236615	-0.731949	-0.234827
Iso_D.9998.1	3.36165	2.89921	-1	-1	0.196857	0.312252	-1	1.11976	2.07484	1.37023	0.851317	2.12259	2.51183	1.9431	0.733595	-1	-1	-1	0.391136	-0.568098	0.546035	0.719869	1.19947	0.432918	1.53408	0.426981	-0.454673	0.636598	2.63102	1.02993	1.71698	-0.240086	1.21062	0.852655	-1	-1	-0.0368005	0.708789
isopolya.1164.1	2.00946	1.35637	1.51588	1.44805	1.57589	0.954238	1.30367	1.65782	2.32282	1.54251	0.918868	1.26197	1.2719	1.63155	3.09555	1.87371	3.49156	1.2549	1.32008	1.0079	0.748377	0.46098	0.65829	-0.269458	0.19164	0.79952	0.159864	0.567573	0.168202	0.234955	0.38742	0.542465	0.530774	0.927879	-1	-0.494366	1.00774	0.872533
isopolya.1309.1	2.23824	3.06524	2.66737	1.94893	3.52514	3.08255	4.00475	3.3419	4.09838	3.99713	3.48957	3.33334	3.55632	3.49361	3.82828	2.83478	3.85237	3.65918	3.43273	4.66774	4.54328	2.75949	3.63014	2.91124	2.76128	2.55133	2.72842	3.23656	3.34669	1.83113	2.34769	1.96835	2.03618	1.58001	5.36001	1.59871	1.73498	2.53487
isopolya.1454.3	1.37347	0.27945	3.51731	1.12263	1.73141	0.569334	1.85638	2.51286	1.78457	1.64829	1.67069	0.401287	1.55264	1.89917	1.56531	0.399787	1.86216	0.583578	0.348462	1.45027	1.08417	0.4727	-0.160354	0.224439	-0.0525424	0.379579	-0.070622	-0.19582	-0.0334312	-0.838666	-0.096941	0.159827	0.158358	-0.168761	0.501943	-1	-0.0558731	-0.503135
isopolya.1471.1	5.62204	5.23519	4.49458	6.29321	6.45559	6.18334	6.09998	6.68668	7.08035	6.35912	5.80882	5.67821	5.19669	5.30748	5.69073	6.33636	6.64178	7.03089	5.556	6.47327	5.65165	5.08194	5.38219	5.1841	5.83068	6.23675	5.30939	6.0974	6.44351	5.6486	5.8885	5.87571	6.12127	5.89872	4.95192	5.46542	6.29734	5.96647
isopolya.1603.1	4.57415	6.13002	5.4622	3.71905	3.92919	3.56757	4.39077	4.71257	4.81081	3.4479	4.49639	3.8192	4.0938	4.52872	4.91081	4.60137	3.67684	3.99065	4.21254	4.49594	4.18403	3.59678	3.96184	4.25609	4.35506	3.94892	4.35193	4.03156	4.14898	3.40125	4.41957	4.31656	4.96752	5.20935	4.84489	4.3118	5.19725	5.55991
isopolya.1742.2	2.73915	0.750908	3.47224	4.26284	4.27017	3.27253	3.10641	3.47954	3.70168	3.23221	1.52737	3.17112	2.28898	3.4379	3.30566	2.75644	2.90308	3.35533	2.65038	3.02338	2.99683	2.96899	1.72712	1.74148	2.09748	1.5372	1.68796	2.27315	2.23523	1.74489	1.41291	2.09304	2.72349	2.62505	1.83553	0.742902	2.86927	2.76122
isopolya.1907.1	0.684516	-1	-1	3.28061	2.90456	2.79992	3.93698	2.70992	4.32912	2.76145	1.85718	1.56437	1.54214	0.754742	1.23009	3.10477	2.59972	2.81223	0.926028	2.33296	2.76289	0.710512	1.32957	0.997551	1.1644	1.10078	2.05781	1.46979	1.73796	0.652543	2.34599	0.193094	0.701025	0.168844	0.189007	0.253735	0.330127	0.270342
isopolya.2050.1	1.06493	-1	2.86956	0.20649	2.13896	0.799101	-0.498544	-1	4.01833	7.84481	6.93486	6.22619	6.38179	0.835046	0.128103	2.41473	0.292347	-0.180146	5.98763	6.70068	4.464	1.97712	-0.460919	0.572281	-0.425323	-0.592551	-0.403175	4.45683	5.08183	5.31741	2.81994	-1	-1	-1	-1	0.568999	-1	-1
isopolya.2239.2	2.09525	1.72848	-0.271759	1.17097	1.47659	1.7022	1.54166	0.969894	1.26508	1.7015	0.667307	1.6334	1.1483	0.0826467	-0.57107	3.2863	-1	1.45147	2.82902	1.26152	1.761	1.0468	-0.182821	1.20613	1.1056	-0.039394	0.966678	1.08973	2.67341	2.13942	1.90352	0.297742	3.02183	1.88752	1.53613	1.30923	2.48413	1.93408
isopolya.2284.1	1.71502	3.6275	3.3176	2.32484	1.33299	2.2158	1.58569	1.73151	2.58188	1.54155	1.75523	1.26762	1.83259	1.99957	3.49815	2.73374	2.31145	2.24151	2.50303	1.83685	2.55097	2.14114	2.0578	2.71109	2.80761	2.15065	2.4316	3.12646	2.11458	3.11107	2.48848	3.20583	3.17092	3.5822	2.42477	3.84989	3.82057	4.04648
isopolya.2302.3	3.73867	4.17339	3.3005	2.89879	3.31119	3.62971	4.184	3.27073	4.06573	3.8739	3.19815	3.92144	3.35526	4.44022	3.53206	3.84173	4.10295	3.81864	3.28264	3.81436	3.88677	3.46602	3.15029	2.78287	3.06089	2.47769	3.2348	2.99772	3.2931	2.11266	3.06393	2.99656	3.74065	4.16532	2.50701	1.94257	3.29781	3.1536
isopolya.2546.1	2.28437	0.69735	-1	1.69364	1.50387	0.760709	0.943588	1.20265	2.17146	1.15386	1.95055	1.44587	1.82359	1.85862	1.72794	2.86845	2.38799	2.29468	1.18	1.20005	1.79889	1.87739	1.70379	2.40313	2.8473	2.584	1.56747	2.84583	2.57805	2.89555	2.57042	3.52118	2.73721	3.16236	3.11062	4.45483	4.08696	4.37684
isopolya.2649.1	0.414279	-1	-1	-1	-0.0638346	-1	0.536235	-0.182756	0.865146	0.848721	-0.0164033	0.144658	1.56903	1.12749	0.793796	1.39006	0.35674	0.409165	0.685696	0.174068	2.24066	-0.0221385	0.85672	0.867381	0.773816	0.839192	1.04985	0.459038	0.5886	0.406342	0.966297	0.196818	0.274366	0.136598	-0.156457	-1	1.34408	0.651102
isopolya.2649.2	2.59667	2.77729	2.87658	1.5838	2.08456	1.71637	1.60497	1.75236	2.72557	4.61854	1.84066	1.53	2.12996	1.32623	0.552773	1.91306	1.21898	1.9627	3.22725	1.48431	1.57844	1.03334	0.984794	1.30675	1.61457	1.59873	0.507384	1.78346	0.872626	0.437471	0.336916	0.906427	1.10671	1.47893	0.330198	1.2096	1.72077	1.74236
isopolya.2830.1	2.49312	1.77576	-1	1.48155	6.49398	1.16693	2.74686	7.53067	10.4637	9.88313	4.23872	2.19185	2.13801	0.963227	5.21826	0.428503	-0.115388	7.92717	8.88257	3.79478	0.915151	-0.00688382	0.124892	1.26931	1.06039	4.62874	8.64114	8.53973	3.99617	0.377035	0.527264	-0.375277	0.209681	-1	2.89352	2.64281	-0.114771	0.100485
isopolya.2844.1	2.71526	4.42106	3.24858	3.49953	3.04444	2.14747	2.95092	3.37828	3.22603	3.16944	2.90153	2.95459	2.78487	2.69509	3.11243	2.8757	2.42464	2.69589	2.58377	2.66455	2.60172	2.56543	2.32947	2.18916	2.0185	1.97119	1.98008	2.96445	2.50333	2.77757	2.54849	1.8661	3.44583	3.00252	0.883691	1.79331	3.03478	2.98961
isopolya.2872.1	3.63772	3.23323	4.42394	4.11484	4.1246	3.39353	3.51313	3.93863	3.35716	3.64281	2.80691	3.03467	2.89898	3.73392	4.6605	4.73308	4.44404	4.29469	2.90284	3.26763	3.90764	3.62935	4.58279	4.02446	3.64968	3.14305	2.54311	2.2542	2.46466	2.2502	2.61031	3.31226	3.44479	2.54781	1.77294	2.32646	3.93236	3.9739
isopolya.2965.2	3.20257	4.1915	4.59132	3.95619	4.15595	2.39612	3.288	3.61745	3.59357	5.81848	2.92573	3.21351	3.33789	3.5974	4.35995	4.18446	3.14387	4.10426	3.78758	3.35199	3.71901	3.15943	3.074	3.30436	3.87889	3.3829	2.37819	3.52352	3.16702	3.58077	3.16914	4.03607	4.08678	4.11534	3.15973	3.96126	4.2644	4.48547
isopolya.3147.1	4.40954	5.48124	5.04825	5.75836	5.27978	4.55297	4.8768	5.48346	5.28617	5.50073	5.02237	4.59963	4.57799	5.19269	5.5744	5.90727	7.55342	5.78686	5.0376	5.05629	5.61398	5.04334	5.5929	5.91764	5.97171	5.85454	5.19129	6.30329	5.66419	6.12878	5.87997	7.34705	6.18623	6.39473	5.8754	7.3672	6.69552	7.12139
isopolya.3417.1	3.35157	2.66345	3.87766	1.15362	-0.433623	2.01219	0.928195	1.72518	3.00242	2.70676	2.22549	2.56949	4.10874	3.13757	3.99953	3.13643	2.57095	2.74246	3.2815	2.28644	2.90024	3.87493	3.40925	3.58665	4.84974	4.96802	3.73006	5.34312	4.93371	5.0065	5.23169	4.88373	6.00666	6.10756	6.92615	6.21027	6.57219	6.34945
isopolya.3418.1	9.19467	10.1387	10.0703	10.5849	9.78039	9.81323	10.1953	10.2502	10.5295	10.0062	9.89378	9.69344	9.74123	10.4829	10.2607	10.368	9.6398	10.0729	9.43418	9.74283	9.61546	9.37232	9.86338	9.90849	10.003	9.51231	9.04864	8.93586	9.16337	8.02657	8.69778	8.08981	8.82053	8.68981	9.53268	8.42232	8.33354	8.08547
isopolya.3423.1	6.00312	7.11218	6.17023	12.3652	7.81535	7.33564	7.57883	7.75311	7.97703	9.2535	7.03545	6.83346	6.52941	7.87965	7.29699	7.18296	7.44126	7.49528	7.83356	6.68328	6.76809	7.68685	7.60166	8.18094	8.77236	8.73184	8.06322	8.82442	8.09914	8.14872	8.2909	8.29424	9.18516	8.60033	9.19308	8.95841	10.0205	9.80001
isopolya.3652.1	3.40838	3.20553	4.39648	4.01504	3.00761	2.83433	3.1304	3.24298	3.33181	2.88362	2.6968	2.83909	3.28999	3.3657	3.4628	3.86668	5.14108	3.87175	3.77999	3.08792	3.35502	3.01283	2.62151	2.81181	3.42	2.91534	2.40734	2.90133	2.536	2.71964	2.51038	3.2565	3.54216	3.5637	2.18897	3.8612	3.44024	3.56942
isopolya.3849.1	1.0283	-1	-1	0.178398	-1	0.496608	-1	0.378791	1.2776	-1	1.37745	-0.253897	-0.0321407	-1	-0.622241	-1	-0.566623	-0.255535	-0.430452	0.218906	0.452818	-0.779631	0.185976	-1	1.25842	-0.160016	0.355553	0.485043	-0.400003	-0.373799	0.0494384	-0.507221	-0.449912	0.428171	-1	-1	-0.00833028	-1
isopolya.3853.1	2.37534	1.84643	5.39439	1.22098	1.74637	1.79856	2.31351	2.82776	2.8687	3.17099	3.79016	0.39464	2.76138	2.27137	1.95099	2.6925	2.8256	2.58733	2.56289	2.6081	2.94534	2.12961	1.59312	0.510144	1.44822	0.59781	0.297273	1.81144	1.66461	0.707532	1.53533	1.61786	2.0532	1.34567	0.204224	-1	1.69622	2.61854
isopolya.3900.1	6.21461	7.32972	11.38	7.14474	6.09657	6.10974	6.42359	6.94993	6.80982	6.49941	6.50851	6.38368	6.84292	9.65776	9.26534	8.01297	7.56007	6.68767	7.53995	7.15044	7.52711	6.59557	7.06831	7.97111	8.0828	8.37474	9.07292	8.18017	6.97659	6.88237	6.59151	7.22965	6.55124	7.52942	5.90297	6.57022	6.85381	7.86751
isopolya.3908.2	1.99966	3.11391	3.62647	1.11146	1.04212	1.54346	2.20852	2.22645	2.17159	2.28469	2.00256	1.67016	1.87293	1.77675	2.75771	2.6163	2.08849	2.21244	1.41317	1.69266	2.02021	1.85793	1.4724	2.14033	1.10131	1.57152	0.987218	2.09609	1.84444	1.16733	1.60003	1.76134	2.40885	3.18305	0.981704	1.00076	2.39398	2.36311
isopolya.417.1	5.02229	6.62478	6.8206	5.80546	4.67984	4.1652	4.8209	5.37993	5.21558	5.88128	5.27223	4.96324	5.1171	4.69855	5.65487	5.80628	7.45978	5.69252	6.04036	5.26733	5.4853	4.5137	5.34649	5.829	5.93217	5.62608	4.69983	5.80837	5.28208	6.15598	6.18509	6.76217	6.22325	6.0699	5.99786	7.48441	6.30076	6.75045
isopolya.4190.3	3.12599	4.77475	3.11446	3.4358	3.73888	2.9236	2.59093	3.99467	4.38769	3.05585	3.63494	2.88815	1.80346	2.89646	2.21963	3.72581	3.93996	3.00721	4.86592	2.31995	3.89483	3.18919	3.38815	3.5553	3.96228	3.67436	2.01201	3.6537	3.27066	4.0398	3.42066	3.48253	3.4485	4.27709	4.55932	4.94868	5.12569	5.46394
isopolya.4207.1	3.33228	2.60791	3.99416	2.87291	2.14199	1.95759	3.51136	3.26586	3.03531	3.09364	2.52487	2.123	2.52724	2.53033	2.85446	2.44801	4.67329	2.9491	1.23917	2.48294	2.44775	1.59171	2.03401	1.55185	2.03244	1.96431	2.29639	2.19294	2.95942	2.03187	2.51494	1.95152	2.40902	3.2008	1.26251	1.61796	2.61497	2.44162
isopolya.4291.3	-1	-1	-1	-0.500651	-0.982029	-0.703953	-0.868896	-0.933091	-0.721637	-1	-1	-0.861247	-1	-0.501493	-1	-1	-0.792538	-0.820145	-1	-0.881318	-1	-0.849672	-1	-1	-0.803208	-0.584555	-1	-0.686732	-0.6342	-1	-1	-0.402503	-1	-1	-1	-1	-0.951831	-0.786821
isopolya.4325.2	4.89664	6.41335	4.02072	5.36102	5.24833	4.81491	5.26683	5.26869	5.99053	5.15846	4.98051	4.99874	5.30975	5.14659	3.88697	4.42291	5.12868	4.72727	4.77301	4.17909	3.77805	3.86584	4.50361	4.25529	4.3523	3.38833	3.04161	3.55033	3.73887	3.20074	3.35635	3.9924	4.1077	4.7832	4.80348	3.89561	4.30391	4.34584
isopolya.4326.3	2.78892	1.51784	-1	-1	-0.871428	-0.286099	0.879222	1.42156	5.07833	1.18231	2.51913	1.91568	1.47493	0.603999	0.360434	0.0364734	-1	1.29238	2.99408	0.220129	0.883435	-0.35844	-0.368961	0.80346	0.678924	1.22226	3.68086	4.47719	2.15578	2.03143	2.30258	2.93997	3.07992	3.8743	2.18015	3.65401	3.43588	3.45753
isopolya.4345.2	2.69414	4.91296	4.50762	4.52626	4.09362	3.36499	3.61507	3.83513	4.00821	3.65085	3.3508	3.00043	3.79998	3.76615	4.10534	4.83722	3.32237	3.43037	4.51105	3.92791	3.95579	3.20907	3.59533	3.72313	3.52734	3.31324	2.72582	3.78463	3.35971	3.30678	3.26471	3.65705	4.36064	4.21564	3.05449	3.32839	4.30871	4.22168
isopolya.4400.1	2.59057	4.29322	2.7161	2.96803	1.01896	1.19635	2.01177	1.75032	2.36385	2.02104	1.59928	1.62725	2.21245	2.6288	1.24109	2.40706	0.845745	2.10462	1.26431	1.61942	3.04882	2.45836	0.60845	1.76325	2.16748	2.31737	1.63958	3.67375	2.65052	3.50409	2.83658	3.08214	4.17741	4.34257	2.94537	3.43175	4.40983	4.31699
isopolya.4497.1	3.48889	2.40373	4.05564	4.76382	3.69463	4.22894	4.79591	5.21442	5.75515	5.01283	4.67013	4.69509	4.27322	5.34066	4.73178	5.41962	5.70133	5.79041	5.17666	5.07486	4.70788	5.07312	4.14015	4.4635	4.49521	4.41007	4.96283	5.44916	5.50863	4.41748	4.77378	4.94447	5.12334	4.24779	5.38673	4.49005	5.70415	5.80926
isopolya.4536.1	4.08666	4.9473	5.23007	4.20586	3.18169	2.81334	2.97988	3.54869	3.97854	6.22787	3.0921	3.79369	3.76378	3.26192	4.03935	4.16924	5.13848	3.88067	4.0541	3.61032	3.55587	3.29031	3.80254	3.55275	3.7518	2.98919	3.13363	3.36701	3.0134	3.86046	3.99961	4.27727	3.73014	4.87225	3.2529	5.11243	3.4315	3.95808
isopolya.4974.1	3.08872	3.26115	2.16167	4.14849	5.07692	2.93735	3.39266	3.54559	4.08165	3.66865	3.14833	2.644	3.54095	3.42464	2.89993	3.68072	3.67127	3.32589	3.08054	3.58514	3.43685	3.14574	2.73945	3.41543	3.50733	3.03994	2.7869	3.65489	3.33166	3.33342	3.43356	3.16089	2.95788	3.28316	3.21551	2.76014	3.91971	4.061
isopolya.5108.1	4.65275	5.25339	6.08652	5.30942	4.66844	4.41718	4.35901	5.25348	5.19144	4.4801	4.49703	5.42203	5.23637	5.21536	5.31303	4.4175	4.55304	4.57306	5.03919	4.60594	4.53009	4.63799	4.88203	4.86043	5.68368	4.92921	4.81064	4.89027	5.04962	5.13299	5.14191	4.67246	5.31026	4.53772	4.0288	5.06762	5.3594	5.35653
isopolya.5328.2	4.37451	3.30213	0.364545	6.13737	6.1441	5.40289	6.27092	6.40028	6.79364	5.30106	6.25692	6.16176	4.96291	6.13786	5.01789	3.26351	6.30747	4.98384	4.52687	4.88216	4.42171	5.13838	5.48195	4.47059	3.08011	2.89949	5.01645	5.03318	7.49438	4.63585	4.93495	2.08049	3.65699	1.53272	2.27788	1.47739	2.28476	2.28741
isopolya.5496.1	0.776683	-1	-1	3.08199	-0.945853	1.87708	1.29751	1.60438	0.884209	-1	2.01667	0.577021	0.189444	0.0511679	5.30601	3.54312	5.25583	3.98259	4.18056	1.71575	1.30623	-0.710436	-0.380516	1.40328	0.0464476	-0.291561	-1	-1	2.82169	-0.693572	-0.23051	-1	3.64141	2.01234	1.05617	1.09183	1.66789	1.88163
isopolya.5550.1	2.12287	2.17355	-0.583724	6.29149	-0.0114768	0.408061	2.0254	4.46325	4.17859	5.54686	-1	-0.617263	-1	-1	0.0528886	0.813079	2.52506	4.70327	-1	-0.459781	-0.406996	-0.67428	-0.0971254	0.358822	0.12013	3.41636	3.63712	0.194495	-0.702822	-0.835697	-0.606051	-1	-1	-1	-0.797483	-0.361764	-0.573603	-0.716314
isopolya.5614.1	3.60273	3.27727	2.62795	3.62724	2.57804	3.12982	3.80858	4.92674	5.18641	5.45265	2.95694	3.77212	3.23366	3.29229	3.16346	3.99559	3.05365	5.33194	4.3102	3.38712	3.30674	2.78849	2.60521	3.15373	3.76697	3.47458	3.56314	4.42711	4.13027	4.25395	4.01632	4.02151	4.43244	4.3508	3.40367	3.50184	4.09426	4.26827
isopolya.571.1	4.88136	4.94791	5.01634	4.87091	7.10473	4.71784	5.26697	5.09744	5.40023	4.73597	4.22361	4.31516	4.37103	5.16397	5.38627	5.23073	5.28454	4.60992	5.02048	4.23595	4.75703	4.3105	3.74975	4.67138	4.58555	4.40559	5.17759	4.67626	4.84185	4.81372	4.56876	5.55886	5.73183	5.52731	5.12752	5.61247	6.43255	6.45802
isopolya.5799.1	2.8788	3.40468	4.28693	3.50549	2.85356	1.86955	2.30412	2.83085	3.70038	2.76876	2.0821	2.43914	2.59826	2.8209	3.64913	3.89501	3.31176	2.80134	2.50455	2.96219	3.21585	2.38726	2.86359	2.69539	2.6694	2.39427	1.72812	1.75542	1.97723	0.695338	1.50952	1.98264	1.83052	2.12258	0.679204	1.16292	0.910229	1.15179
isopolya.5852.5	5.3004	5.99974	5.84834	4.97838	5.66876	3.78865	4.59014	4.59885	5.09622	4.73217	4.97241	4.08686	4.48067	4.71737	4.81694	5.19461	4.0149	4.04422	3.84804	3.98429	4.05797	3.34111	3.48681	4.42499	4.55685	3.80399	3.322	4.18279	3.76842	3.12487	3.57097	2.48258	3.12915	2.75348	2.8138	2.49573	2.61404	2.12484
isopolya.5873.2	2.927	3.71594	-1	3.05464	3.27362	3.09358	3.81308	3.5237	4.65279	4.1658	3.71994	3.84277	3.35432	3.38829	2.92661	3.60274	2.76169	3.49157	2.82989	3.23523	3.45405	2.76319	2.96684	2.65146	2.69478	2.95923	2.26981	2.74358	3.60483	2.84026	2.80431	3.37425	2.82692	3.4063	2.7139	3.10561	3.46297	3.73259
isopolya.6057.1	2.9409	4.8847	4.39048	2.6339	2.91885	3.36728	3.9025	3.82014	3.95254	4.31661	3.20807	3.85731	3.64716	3.75471	3.04062	2.99785	2.78956	3.83992	3.32184	3.49022	2.95567	3.24059	3.21282	3.59295	3.6078	3.29341	3.0433	4.10352	4.18563	4.12077	4.31501	3.85252	4.26473	3.9406	4.03971	3.73745	4.44167	4.04683
isopolya.612.2	3.49918	3.55687	3.03977	3.34732	3.26301	2.42899	3.83297	3.61207	3.52853	3.49615	2.57012	1.83666	3.17344	2.65692	1.92453	3.22908	1.89101	3.41834	1.90722	2.42052	2.65762	3.28015	2.7131	2.94832	1.29825	1.17848	2.17975	3.25224	2.6475	2.09683	2.13513	1.56172	2.57905	3.47812	1.24755	2.62031	2.84959	2.81913
isopolya.613.2	3.52387	4.68141	5.109	4.02584	3.63286	3.15977	3.72382	3.93085	4.07851	4.50424	3.27034	3.34076	3.57724	4.05367	4.11585	4.54951	5.42738	4.4105	4.48604	3.8917	4.22219	3.56933	3.88106	4.20506	4.22945	3.87903	3.28387	3.72063	3.10544	3.43531	3.10549	4.1475	4.1016	4.49336	3.4172	5.32841	4.43511	4.69242
isopolya.6334.1	0.453512	2.42477	3.79	3.4273	2.97505	2.48456	3.58437	3.38044	3.74503	3.59302	2.06353	2.99896	2.33004	2.79802	-0.0683655	0.41606	1.8704	1.17766	-0.328534	0.701846	1.20287	1.83116	1.20805	0.517809	2.34507	1.57914	1.45197	1.77164	1.7221	0.852691	2.66626	2.64379	2.99135	2.61892	3.06125	3.10261	2.77355	1.97591
isopolya.6429.1	-1	0.504043	-1	-1	-1	-0.609607	-0.830389	-1	-1	-1	-1	-1	-1	-1	-0.111863	-1	-1	-1	-1	-1	-1	-1	-0.635696	-1	-1	-1	-1	-1	-1	-1	-1	-1	-1	-1	-1	-1	-1	-1
isopolya.6592.1	0.816384	1.77015	3.60383	0.142157	0.65112	0.460344	0.615863	1.65354	1.57817	1.7179	0.673564	0.479176	0.654203	0.270208	2.77272	1.39619	1.13538	1.17137	1.41298	0.957343	0.871396	0.93497	0.39499	0.60099	1.43817	0.762992	0.864549	1.03503	0.8278	0.402844	0.899019	1.31194	1.65318	1.13128	3.586	1.01179	1.74321	1.65828
isopolya.6596.1	0.911693	1.72478	-1	0.904164	0.871845	0.425886	1.74371	2.12368	2.1864	1.4873	1.3387	0.931965	0.71583	1.13203	1.50997	2.21049	1.86606	0.996435	-0.0528242	0.628244	1.06184	0.928888	0.390231	0.4915	0.211974	0.484394	-0.236272	-0.400921	-0.16787	-0.527079	-0.0711314	-0.615806	0.278557	-0.3734	0.910658	-1	-0.0855161	-0.43287
isopolya.6702.1	5.53125	6.98893	6.93753	5.74611	5.59206	5.51831	6.12908	5.55863	6.34027	6.51932	6.86885	5.90426	5.74867	5.86856	5.24711	6.13449	6.77549	6.00755	6.00805	6.4396	6.22794	5.1784	5.59677	5.71161	6.1703	6.18293	5.6276	5.43046	5.21627	4.77282	5.23164	5.10922	6.66504	5.52859	6.5922	6.82085	6.47587	6.58166
isopolya.6962.2	1.90421	2.81363	3.77854	2.76193	1.25393	1.54491	1.81582	1.90664	2.62801	2.61486	2.13469	1.67981	1.80041	1.82393	2.96454	2.23627	3.16313	2.27154	2.67964	1.48728	1.74357	0.937473	1.58241	1.63917	1.55802	0.712354	0.115879	0.908616	0.381586	0.853786	0.836165	0.358481	0.523952	0.964397	0.358488	0.582624	0.776573	0.979887
isopolya.6986.1	4.15143	5.20581	5.19715	4.58503	4.42388	4.44315	5.39588	5.30353	5.89691	5.53927	3.60879	4.50392	4.36759	4.93527	4.2522	5.60984	7.11455	5.18864	5.4998	4.6866	5.00349	4.24028	4.48926	4.94772	5.5972	5.32503	4.94888	5.8091	4.75398	5.16347	5.43181	5.54166	5.50848	5.77879	5.06659	5.41203	6.08683	6.23133
isopolya.7027.2	4.42854	3.50671	5.19087	4.84795	3.21912	3.05163	3.83322	3.85617	4.37573	2.76938	3.91602	3.7844	3.67259	4.49885	5.74756	4.56849	3.78295	3.95455	4.12533	3.7859	4.21374	3.73618	3.82008	4.35499	4.07135	3.82848	3.48907	4.25889	4.26988	4.2391	4.10036	4.46158	4.8293	4.04141	3.91072	4.81803	4.8041	4.96332
isopolya.7033.1	2.55848	2.91477	4.35391	2.32765	2.06008	2.0057	3.31398	3.12537	2.56628	3.14031	2.00489	1.82671	2.24213	2.59241	2.46406	2.939	2.85011	2.75798	1.10478	2.081	2.6422	1.51605	1.97195	2.36397	2.75725	1.99282	1.35662	1.77989	1.28038	1.63586	1.68186	1.29964	1.44428	1.51426	1.39975	2.05873	1.91435	1.7491
isopolya.7111.1	3.08128	4.83143	5.58319	7.26375	6.78385	4.31955	5.23774	5.16683	5.72139	5.81502	6.30827	6.02276	6.20762	6.56347	6.13905	6.14507	5.56063	6.48539	7.43384	5.89263	6.26758	6.74908	6.4791	7.30808	8.16887	8.25103	7.85439	8.80902	7.51001	7.92871	7.91534	8.0186	8.92723	8.36028	9.00137	9.38691	9.09204	9.07875
isopolya.7113.1	0.319663	1.90314	-1	-1	-1	0.241029	0.69344	0.501767	0.663457	1.25726	0.604456	-0.25742	1.25388	1.51928	0.57602	1.41623	-1	0.828742	0.530946	1.01518	0.882391	1.13251	0.1522	1.85184	1.17307	1.43634	1.26995	2.67047	2.4797	2.90325	2.157	3.28658	3.13412	3.77474	2.42496	2.7309	3.95373	4.12153
isopolya.7179.1	2.92766	3.62454	4.25035	3.27601	2.71679	1.68397	2.5005	2.74017	2.76067	3.01934	2.35232	2.28847	3.10173	2.94885	4.2405	3.00162	2.46532	2.80919	3.14662	2.93635	3.16945	2.50565	2.49222	2.87181	2.62857	2.86678	1.74038	3.55921	3.04342	3.74495	3.48519	4.01716	3.89231	3.86824	3.66527	3.13801	4.33821	4.42028
isopolya.7229.1	1.66251	0.12051	2.77998	1.18685	0.357653	0.22822	0.823407	0.895866	1.02423	1.11894	1.40805	0.794202	0.595	1.18427	0.742718	0.97025	1.23052	0.757097	0.763817	0.954901	1.56008	0.990418	0.159149	1.44277	0.916265	0.660706	1.64274	0.497732	0.488279	0.910912	0.58316	0.374899	0.37876	0.73919	0.53759	1.17257	1.21415	1.14685
isopolya.730.2	4.60243	4.96225	4.8135	6.19613	4.54999	3.79912	5.13403	3.70085	5.76874	5.70485	5.16382	5.64839	4.94822	3.96159	3.88405	4.66268	2.70762	3.66153	4.48155	4.33041	4.08729	4.21139	3.59592	4.64115	4.23679	3.37428	4.5527	5.13256	5.09873	5.0046	4.34289	4.05885	4.7097	5.1643	4.59522	4.96829	5.58842	5.39995
isopolya.7386.1	4.79305	4.86667	5.77745	4.90502	4.75331	4.07049	4.61821	4.55645	4.72957	4.68449	4.28097	4.09863	4.48478	4.71836	4.29895	4.86685	5.46037	4.77778	4.77762	4.56223	4.3715	3.76969	3.58522	4.18328	3.49441	3.66395	2.80799	4.06425	3.77148	3.97812	3.4903	4.14125	4.6379	5.03301	3.4617	2.57762	4.38407	4.29115
isopolya.7427.1	4.94156	5.24561	6.30526	5.37804	4.26025	3.75264	4.39931	4.65604	4.88831	5.83995	4.44625	4.38108	5.01389	4.6492	5.40362	5.55823	6.42475	5.52072	4.90327	4.66404	4.92911	4.24119	4.81096	5.24765	5.42176	5.13656	4.72918	5.55582	4.83645	5.53281	5.45429	6.44905	5.53861	5.90205	4.83179	6.29061	6.05053	6.42057
isopolya.7547.1	4.0562	4.47994	3.6252	4.53518	4.09425	3.06075	3.4119	4.10504	4.58068	3.75186	3.55351	3.1185	2.55513	3.49056	4.12216	3.55717	4.21162	3.55634	4.40395	3.29243	3.20506	2.81236	3.15412	3.14396	2.82793	2.62451	2.25127	2.07072	3.07017	1.75187	2.49537	2.46512	3.14542	3.19871	2.98708	1.51384	2.39165	1.96183
isopolya.7585.2	3.26433	4.16891	5.08443	2.79155	1.82575	2.51925	3.43628	3.15377	3.53054	3.7561	2.9523	3.27692	2.57681	2.52304	2.4765	3.33569	3.41805	3.4367	2.44229	2.98654	3.06397	2.90104	2.69386	2.53979	3.58086	3.29053	2.68173	3.06238	3.13509	3.39839	3.15005	3.84267	3.05855	3.76073	2.39054	3.73981	3.68667	4.25985
isopolya.7593.1	1.73425	2.0439	-1	-1	-1	0.628474	-0.314665	-0.121527	-1	-0.591894	0.511241	-1	-1	-0.204219	-1	-1	-0.576096	-0.448676	-0.491202	-1	-0.680939	-0.435477	-1	-1	-0.654128	-0.628495	1.0864	3.14974	2.52965	4.16861	3.33854	4.75	4.59664	4.5477	2.77522	2.63777	2.75572	1.00429
isopolya.7634.4	4.74775	6.05819	6.33053	5.27881	4.64723	3.82585	4.12004	4.70669	4.45399	3.88591	3.71651	4.00602	4.29659	5.46275	4.95377	5.74211	5.38695	4.22577	4.80806	4.62051	5.41272	4.89904	4.91624	5.28202	4.89633	4.28547	4.42252	5.01273	4.38326	4.72833	4.6038	5.10556	5.0186	4.56651	4.3953	4.39806	5.3278	5.30493
isopolya.7851.1	3.6897	4.49408	4.87291	3.92496	2.36753	2.85789	3.09072	3.55096	3.10781	8.94171	3.41035	2.92976	2.88026	3.37345	5.08061	4.48818	6.49614	4.52061	4.5538	3.37046	3.87016	2.7238	4.25523	4.52719	4.69318	4.70441	5.12292	3.58472	2.55826	3.17547	3.41963	4.67316	4.83903	6.99955	5.43092	7.6542	4.89775	5.67386
isopolya.8083.2	3.79136	2.71211	3.24096	0.796762	2.6085	2.73835	2.84366	2.50758	2.76721	1.91563	2.79937	3.43961	3.38599	3.62066	2.87967	2.84814	2.82594	2.14862	2.24888	3.08483	2.62229	2.1888	2.52048	2.51935	1.08444	0.913455	1.23201	2.01071	2.5962	1.00491	1.34519	0.661692	1.55307	1.26849	-0.491744	0.352533	1.17619	0.696791
isopolya.8103.2	2.39049	2.19849	1.70885	1.43845	1.28999	1.26451	1.23135	2.71311	2.12226	2.3366	2.52989	1.91856	1.47824	1.27176	1.09347	1.2703	0.408725	0.744891	1.34766	1.70646	1.76194	0.554443	0.459695	1.74211	0.0795741	0.66553	0.227001	0.802503	1.45129	0.468348	0.131085	-1	0.631999	1.42313	1.20916	0.51081	0.265512	-0.0794011
isopolya.8493.1	1.4705	1.27659	1.82657	2.2087	1.86898	2.40716	2.0589	2.83025	2.92567	3.3589	1.84635	2.44733	2.20437	1.91564	1.75503	2.86306	3.32334	3.54384	2.5063	2.09406	1.2004	2.2011	2.4135	2.59925	2.50488	1.90063	2.06408	1.7149	3.46851	2.15477	2.50256	0.94911	0.953314	1.28397	1.2929	1.23797	1.66843	1.3703
isopolya.912.1	-0.295324	0.308582	-1	1.29322	0.553089	0.451334	0.336843	1.08837	1.82058	0.732492	0.782458	0.742875	0.989834	0.941362	3.47419	0.466391	1.40625	0.673396	0.533324	0.372271	0.760614	0.360953	0.0816065	0.349701	0.47453	0.276491	0.202359	0.0480412	0.0262145	-0.239554	0.143966	-0.214938	0.591183	0.893459	-0.330586	-0.592136	0.709512	0.509695
isototal.1253.3	0.895941	2.75161	2.33712	0.857231	1.8825	1.81527	2.41576	2.74643	2.2901	1.66994	0.800319	1.85822	1.78528	2.00246	1.33566	1.63664	2.14808	2.47061	2.06663	1.49211	1.53786	1.77929	0.761289	1.36919	1.59216	1.81813	2.02449	2.61204	2.45896	2.90712	2.52004	2.02864	3.26872	3.58474	2.31366	1.64889	3.96788	3.25342
isototal.1381.3	0.816263	1.7427	2.30616	0.360093	1.25997	0.211583	1.33849	1.2699	0.379956	1.83187	0.921512	0.706525	1.06838	1.46753	1.11734	0.569964	1.15398	1.02664	0.414886	1.29856	1.60573	1.46928	0.887984	2.02383	1.39039	0.659632	0.467237	0.600711	0.912602	0.541404	0.532677	0.362674	1.96372	1.57173	1.69288	3.32999	2.38159	2.43606
isototal.1523.1	0.707128	1.74963	2.61521	0.0469779	-0.100573	1.01535	0.800922	2.11956	-0.0729206	1.90448	-0.278646	1.16723	0.538579	1.19078	0.460524	1.47009	1.86905	0.594943	0.133677	1.09989	0.7964	0.575405	0.360127	0.565889	0.732123	0.576773	-0.255429	0.469291	0.0744923	0.113846	0.267226	0.194853	0.957855	1.19465	-0.55265	0.382254	1.84064	1.36745
isototal.1633.1	5.29908	5.65148	5.14091	6.11767	6.63594	5.6029	6.04853	6.41121	6.53204	5.64105	5.08037	5.03357	5.09382	6.1429	5.58288	6.43143	6.17164	5.87036	5.71269	5.87349	5.92076	5.71149	5.57461	5.67505	5.61617	5.54889	5.49834	6.26027	5.8754	5.82795	5.80372	5.86902	6.23893	5.61613	4.87566	4.7953	6.77193	6.62384
isototal.1973.4	1.8286	3.88796	3.6164	2.82728	1.76682	1.70985	1.72423	2.26804	3.23886	2.81489	2.87963	1.53532	2.18173	2.60219	3.60895	3.57307	2.66152	2.93366	2.25997	2.20346	2.58231	1.61176	2.11716	2.39164	2.15743	2.29974	1.02389	2.31547	1.77334	2.57319	1.31393	2.77183	2.14126	2.92391	2.75147	1.39887	3.38023	3.04723
isototal.2127.1	4.26985	5.05609	5.03146	3.83535	2.9556	3.36704	3.68292	3.35981	4.23913	4.08738	3.8245	3.83662	3.62951	3.38801	5.05889	4.09127	3.67901	3.78509	4.81279	3.35679	4.14015	2.8887	3.18356	3.81474	3.68327	3.44904	2.70485	3.93368	3.1929	3.89748	3.27498	3.35901	3.75853	3.22628	2.84391	2.76378	3.60065	3.75655
isototal.2129.1	2.08205	-1	2.44522	5.97891	4.94351	0.762075	0.766512	0.270575	0.622129	1.65156	-0.465816	0.587568	1.74504	0.819936	-0.630489	0.740322	1.37028	0.316628	2.32251	-0.0370632	0.803108	0.488737	0.0714192	0.730593	1.7862	1.02374	6.43298	6.53716	3.29266	6.97623	6.22686	8.49586	10.0936	9.86569	8.72637	9.73069	8.72002	7.11362
isototal.2131.1	2.75127	-0.215131	2.36739	1.97831	3.68223	1.64495	2.50995	2.69478	2.10314	2.41626	1.77223	2.64613	2.674	2.32247	3.08172	2.34289	2.84731	2.39162	2.97416	1.6502	2.29948	2.60337	2.10521	3.11475	3.48359	3.25281	3.51363	4.35464	3.91927	4.47102	4.20525	3.97228	4.72418	4.14746	2.89813	3.70002	4.95218	4.74264
isototal.2211.3	5.3592	6.3155	5.7314	7.96305	4.65198	4.69243	5.24889	5.06197	4.86092	5.32403	4.43451	5.24222	4.94362	4.46839	4.07653	3.19401	7.25988	4.44269	4.78058	4.67832	4.75075	4.38685	4.14196	3.89005	4.22817	4.22407	2.89466	4.08988	3.8666	4.26759	4.32701	4.85241	5.92006	5.76324	4.72441	5.01018	6.29265	6.37829
isototal.2214.1	3.3503	3.76742	4.04653	4.17674	2.90493	2.07344	2.33915	2.75808	3.02147	5.41126	2.41019	2.69369	2.44006	2.3483	3.48081	3.66766	3.90029	3.72977	3.60295	3.02597	3.34654	2.76329	3.16428	2.85863	2.96262	2.82886	1.66461	2.79414	2.51593	2.32564	2.3941	3.86236	3.71178	3.79284	2.59855	4.92443	4.10709	4.12252
isototal.2285.1	3.10824	2.65912	2.53876	6.63369	0.516326	1.69279	1.93412	1.79308	8.32958	9.68155	10.7859	9.43674	9.21291	2.79057	5.73374	3.23658	2.88913	1.94852	9.10198	9.51406	7.20667	5.63893	2.17221	2.24775	2.29392	1.79293	3.83349	7.80405	9.92995	8.19936	3.79675	1.15887	1.38029	1.07633	0.154178	0.399003	0.266819	0.217795
isototal.2303.1	4.03025	3.98598	4.69229	4.93968	4.65502	4.33959	5.15224	4.94885	5.18457	4.5465	2.78325	3.82034	3.09835	4.17882	4.07159	4.30029	4.72807	4.06073	4.78441	4.2162	4.0111	3.77143	3.97521	4.16186	3.68226	3.79787	3.90044	4.62702	4.48036	4.21954	4.48362	4.00352	4.72216	5.03209	3.36782	2.73331	4.83122	4.74394
isototal.2325.1	6.00899	6.77948	7.11181	6.82627	6.4398	5.74259	6.09538	6.1754	6.65304	5.96591	6.17943	6.02899	5.99295	6.49733	5.59704	6.54697	5.97932	5.98424	6.09552	5.77872	5.85038	5.66057	5.59347	6.23445	6.14054	5.91279	5.67783	6.20883	5.97993	5.80356	6.03657	5.73202	6.64422	6.04942	6.02448	6.47836	6.51561	6.71539
isototal.2369.1	0.443137	0.00668271	-1	0.474059	-0.875766	0.51934	0.729443	0.330926	0.335663	0.217772	-1	0.201665	-1	1.35057	-1	-1	-1	0.24282	-0.149331	-1	-1	0.484437	-0.370511	-0.324068	-1	-1	-0.682574	-1	0.960644	-0.784286	-0.596156	-1	-1	-0.651504	-1	-1	-0.834931	-1
isototal.2506.1	3.66917	1.60608	4.02162	1.59953	2.11875	2.43739	2.20458	2.63344	2.23187	2.31795	2.02807	2.60472	2.66954	2.76527	2.08818	2.57448	1.76414	2.54143	1.41681	2.54777	2.78671	2.14522	2.22962	2.41398	2.09905	2.25142	1.6004	2.21296	2.7094	1.74255	2.66214	1.42559	2.97679	2.80849	1.69766	1.99743	2.94713	2.79335
isototal.2590.3	2.87277	3.52585	4.09613	3.71529	2.4463	3.08184	3.38768	3.18749	3.54751	2.71656	3.23135	3.05905	3.19688	3.60717	2.34411	2.81844	3.37981	2.90158	2.94279	3.0466	2.7087	3.08108	2.40508	2.55102	1.66353	1.95298	2.56864	2.36514	2.72381	1.93364	1.98796	1.24703	2.87512	2.92934	1.8917	0.916511	2.66453	2.17215
isototal.2808.1	-1	2.36702	-1	-1	-1	-1	-0.249409	0.682308	-1	-0.326519	-1	-1	-0.100679	0.396514	-1	0.335011	0.634958	0.113915	-1	0.0696106	-0.191538	0.404791	-0.392165	0.393094	0.405891	0.247583	0.480826	1.01395	0.885573	1.32455	0.607344	0.768569	1.74461	1.48095	1.13861	-0.262459	3.51008	3.19024
isototal.3098.1	0.869665	1.25865	-1	3.39795	2.25662	2.14194	1.67142	3.20594	3.47839	1.82997	3.6456	1.66155	2.07871	2.47089	0.591876	1.14862	2.58407	2.36042	1.59768	0.99013	0.751679	0.594372	0.66655	0.106475	0.587487	1.25795	1.19681	1.04585	3.27009	0.658411	1.36418	-1	1.99454	-1	-0.1691	-1	0.412685	-0.268219
isototal.3141.1	3.7501	3.93206	5.22196	3.75512	5.14522	2.86981	3.29478	3.79938	4.12245	3.72077	3.71867	3.78013	4.12213	4.50412	2.88011	3.73694	6.87492	3.04686	4.01676	3.00595	3.69384	3.01012	3.15453	3.97907	3.96882	3.93122	3.83394	3.87414	3.79648	3.94151	3.71984	4.09282	4.31325	4.68363	3.42104	5.14058	4.94311	5.31018
isototal.3348.1	2.03002	0.731063	3.94185	4.30082	2.91746	2.64347	2.4384	2.97788	3.46301	3.47519	1.95802	2.18348	3.02143	2.20368	3.01601	3.24613	3.4281	3.21224	3.06064	3.22348	2.60447	2.77554	2.90205	2.71814	3.19273	3.21052	2.64586	3.94886	2.97219	3.73776	3.68004	4.34964	3.98419	4.20759	3.71285	3.27746	4.59295	4.47259
isototal.3464.2	4.8427	5.59514	5.71461	5.18242	4.99988	4.3454	4.79799	5.44301	5.5502	5.13381	4.29036	4.81123	4.53324	5.356	5.95134	5.27166	6.91669	4.77353	3.97305	4.73058	4.35346	4.56561	4.71007	4.60333	4.9597	4.79343	4.77848	5.08381	5.04156	5.07195	4.85107	5.17341	5.28738	4.71652	5.20898	5.35699	5.82562	5.96567
isototal.3483.2	3.95387	5.03739	4.6178	3.1803	2.51682	2.95662	2.7413	3.64552	3.60867	3.58192	3.30814	3.41445	3.06254	4.1044	4.59715	4.12382	3.02735	3.01466	3.65171	3.04484	3.60295	3.27523	3.54684	3.64569	3.66125	3.6574	3.49317	3.99306	3.16366	3.71271	3.08534	3.88278	4.17945	3.34117	3.28843	4.19283	4.3293	4.51529
isototal.3535.1	5.34658	4.49209	4.5362	5.70504	4.02003	4.14765	3.9927	4.42865	6.04122	6.04967	5.89248	5.16866	5.26167	4.33451	4.50261	4.65247	5.05457	4.65428	4.43139	5.06098	4.36862	3.64253	4.34295	4.17896	4.24993	3.82069	4.19391	5.37599	5.42873	6.11039	6.17684	4.82381	4.52776	4.02587	6.47028	2.99689	3.56337	3.28651
isototal.3561.1	4.08852	5.79049	5.88728	5.06562	5.87041	3.68693	3.6153	4.38676	4.44574	4.39707	4.54041	3.83351	4.23631	4.89142	5.51407	5.04573	5.51979	4.89228	4.51013	4.20746	4.75574	4.17286	4.44171	5.01509	5.322	4.7521	4.60453	5.07264	4.52473	5.10583	4.96877	5.9637	5.17157	4.83761	4.44935	6.41719	5.75186	6.0299
isototal.3632.2	3.69478	3.87367	4.80514	5.37455	4.22886	3.01801	3.25952	3.91735	3.89794	4.71336	3.77325	3.67779	3.6889	4.09817	4.88228	4.61374	3.86169	4.4023	4.12224	3.91233	4.21234	3.93059	4.30669	4.43102	4.73211	4.47399	3.72492	4.63556	4.083	4.79608	4.34573	5.41159	4.72844	4.58712	3.7981	5.83511	5.01994	5.55214
isototal.3890.1	2.83879	1.66225	4.396	2.64239	2.16166	2.03629	2.48547	2.17773	2.63014	3.84622	2.54872	2.51933	3.19072	2.11146	2.7517	2.82428	2.15745	1.54045	2.60855	3.1767	2.43736	2.1091	1.59706	2.90873	2.35905	1.76819	1.98692	1.97004	1.59426	2.35512	2.06784	2.3884	1.32468	3.29423	1.21187	0.782056	1.07277	0.924035
isototal.422.1	5.74132	6.59263	5.39889	5.4141	4.67192	4.84892	5.29708	4.87557	5.14854	4.79655	4.97186	4.23369	4.12576	4.17891	3.1523	3.82548	4.3777	3.55553	3.84483	2.46722	4.12279	2.85173	2.48623	2.97301	1.97876	2.59565	2.71414	2.92391	2.15289	1.87568	1.28535	1.51217	2.04743	2.24728	-1	1.59566	1.50623	0.820101
isototal.4691.1	4.99342	3.9844	5.30952	5.61455	5.37247	4.34838	4.9959	5.57859	5.39591	4.85246	4.02758	4.03663	3.92877	3.82186	4.41271	3.55065	3.99695	3.12692	3.30765	2.59958	3.19415	2.77597	2.98375	2.83493	3.32635	2.72797	0.42734	2.62	1.83038	2.93874	2.62756	3.85889	2.84985	3.30609	2.77631	2.29832	1.62751	0.624982
isototal.4742.1	3.91377	4.54714	5.07632	4.48178	5.11331	3.76412	3.68695	4.1674	4.49407	3.40202	3.78227	3.30614	4.08525	4.75644	4.66965	4.57222	3.88522	4.68328	3.41498	3.6735	4.05786	3.66083	3.35116	4.15916	4.28234	3.72205	4.35564	4.54276	4.17939	4.73135	4.51753	4.5955	5.00929	5.21033	4.61993	4.22299	5.17961	5.12206
isototal.476.1	5.1426	5.06573	4.66643	5.30442	5.60758	5.05511	5.72189	6.29807	6.04149	5.55417	4.80849	5.13209	4.52369	5.50288	5.06516	5.66266	4.28144	5.09172	5.59452	4.91903	5.03237	5.7715	5.08796	5.36949	5.49327	5.24172	4.90576	5.87307	5.6127	5.43078	5.49774	5.92265	6.21388	5.74335	6.59515	6.53174	6.7947	6.75375
isototal.4883.1	0.142235	-1	-1	0.48793	1.32826	-0.086545	0.101038	0.153559	2.06091	1.73852	1.97624	0.879134	2.15584	-1	2.35337	2.92603	0.886874	1.09563	0.358942	0.0466086	2.7261	-0.00648116	0.451937	-0.383656	0.101251	-0.270964	-0.753226	0.0917294	-0.604235	-0.205733	-0.016842	-0.436329	-0.266326	0.618158	-1	-0.252093	0.705295	0.0230251
isototal.5767.1	1.9942	3.30009	4.14006	3.11101	3.3031	2.82681	2.48349	2.95302	3.47073	3.18117	2.24385	2.61064	3.30856	3.48812	3.89321	3.92777	3.34235	3.45064	2.79275	3.03277	3.29325	3.03182	2.81225	3.22977	3.41968	3.33849	3.17216	3.61487	3.1992	3.32858	3.19317	3.39473	4.16249	4.16708	3.82351	4.30505	4.18775	4.5381
isototal.5785.1	5.59132	7.01388	7.40153	6.0216	5.35583	4.70191	5.05398	5.14014	5.03265	5.88433	5.15102	4.62852	5.15492	5.88297	5.6667	6.32266	6.18403	5.47991	5.57574	5.64667	5.80269	5.00598	5.14677	5.45949	5.41848	5.30745	5.10211	5.08411	4.67114	4.91941	4.61936	5.01452	5.12705	5.26945	5.35075	4.47767	5.28196	5.02659
isototal.5793.1	3.14734	4.85592	4.63608	3.76731	3.69854	3.1001	3.14892	3.47612	3.82479	4.15834	3.32059	3.21577	3.73997	3.65805	4.91436	3.89671	3.86214	3.36912	3.51298	3.65084	3.99767	2.8545	1.7654	3.55572	2.4451	2.90309	2.32181	3.56448	3.38245	2.88076	3.13684	2.4564	3.94101	4.64111	3.21891	3.5753	4.41246	4.20429
isototal.5807.2	0.403972	1.77103	0.830056	-1	0.456619	1.67102	0.510008	2.04759	3.14773	3.54306	-1	1.76993	1.91563	2.19689	3.09438	1.86454	1.2198	1.75422	-1	0.032177	1.39227	-0.0951636	-0.282829	1.09782	1.53448	2.3454	1.91017	0.244836	0.371638	0.279916	1.11899	1.26923	0.0113641	1.41887	-0.163959	0.442616	-0.444158	-0.0916266
isototal.6200.1	1.56444	2.18777	2.74699	2.06883	0.546801	1.7841	0.808443	0.442907	1.04672	5.89242	1.52915	0.554457	1.63124	0.7302	0.60599	2.2893	3.48534	2.12738	4.23434	1.27365	1.95494	0.794002	1.02593	0.853331	1.09966	1.74803	2.26872	2.25871	1.79165	2.35279	2.23722	3.81202	3.55213	4.14347	3.759	5.36585	1.8795	3.31833
isototal.6352.1	4.5829	4.34113	4.35129	4.72968	4.68093	4.41448	4.88541	4.37112	4.94654	3.87866	3.63143	3.32264	3.695	4.44031	5.1011	4.8034	4.58275	4.23808	3.15914	4.68561	4.51369	3.94238	3.82001	4.19131	3.45268	3.52143	3.58451	3.88338	3.4818	3.34625	3.0113	2.89756	4.28982	4.28511	3.62692	1.44492	4.10811	3.75429
isototal.6776.1	5.5586	6.45394	5.25405	4.19256	3.31619	2.63078	2.54731	4.50753	4.64278	3.18585	3.27091	3.59318	4.48719	4.08766	4.97238	3.86348	2.294	3.77236	3.76572	3.46428	2.54375	2.56821	1.86593	2.57258	2.01265	2.52413	1.18724	1.78532	1.27877	2.27392	1.76017	2.39586	2.8033	2.11136	-1	2.29505	0.801945	1.21857
isototal.6787.1	-1	3.33475	0.191215	2.25646	2.10812	1.15043	0.626138	1.69606	2.0828	2.26986	1.90692	0.709352	1.84871	0.817099	1.22375	-0.176441	1.27436	0.0705128	0.628405	1.63607	1.25676	-0.578988	-0.152577	0.344422	0.06121	0.701513	-0.0711793	0.166566	-0.378197	0.208897	-1	-0.732593	-0.605786	0.223437	-1	-1	0.250246	-0.760001
isototal.6788.1	1.62622	1.46779	-1	-0.0226752	-0.196397	1.0306	0.323769	2.27274	2.21618	1.52288	0.775482	1.26433	1.58586	0.590531	1.70493	0.475704	0.182996	1.70838	0.397785	0.265764	0.174627	-0.152986	0.43028	-0.669839	0.119204	0.579997	0.170859	1.301	-0.0141796	0.801581	-0.178671	-0.736809	0.0474328	0.302139	3.71845	-0.551054	-0.477827	-0.434094
isototal.703.1	7.86044	8.41734	8.98263	9.04726	7.7769	6.97281	7.38335	7.62629	7.62556	9.56543	7.98677	7.83832	7.96902	9.03023	8.61038	8.97874	8.50669	7.68785	8.02737	8.30001	8.64876	8.13469	8.09348	8.38248	8.50702	8.15424	7.90548	8.31666	7.81734	7.9001	7.98581	8.01386	8.63483	8.243	7.66049	8.85734	8.7179	8.84508
isototal.946.1	2.23466	4.33432	3.54321	3.24082	2.87641	2.63759	2.25559	3.44214	2.63827	2.8702	3.20278	2.99881	3.18893	2.90406	2.86395	4.4355	3.90567	2.8575	3.02242	2.43282	3.93426	2.60869	3.12501	3.99107	3.86436	3.2423	2.34259	3.16516	3.45005	3.58648	3.15112	3.68556	3.61784	3.30036	4.23531	3.81543	4.30712	4.38198
isototal.956.1	0.673962	1.99136	1.57505	0.614506	0.367048	0.228334	0.608368	0.687857	1.32884	0.507672	2.12169	0.154356	0.756503	0.92102	0.21346	1.85336	2.016	0.949755	0.729419	0.963437	1.1491	1.27938	1.20885	0.783182	1.03029	1.41909	1.30626	1.71406	0.841351	0.734015	1.75663	0.929279	1.8743	2.23254	1.6079	2.26521	2.20119	2.26847
MDT-31	1.84966	-1	-1	1.11546	-0.927441	2.67875	1.82639	0.402404	1.3873	2.35803	2.62288	0.591258	2.57082	2.00378	0.975999	0.970095	2.08005	-0.0172879	0.513724	1.85693	1.69468	1.68314	0.678905	1.69639	2.03349	0.87002	-0.0915587	1.34828	1.83871	1.57143	1.67567	1.39553	2.44293	2.23108	2.38573	0.804983	1.87652	1.75766
mev-1	6.12413	7.05244	7.11736	7.47459	6.62575	6.42301	7.07313	6.58416	7.2984	6.65286	6.93153	6.7389	6.25362	6.79366	6.03349	6.31523	6.52695	6.46126	6.61132	6.3588	5.91834	5.91138	6.3026	6.11752	5.94543	5.88832	6.0857	6.20992	6.23751	5.26921	5.74084	5.7115	6.26532	6.36778	6.89448	6.25795	6.3773	6.20664
mrpl-47	4.73458	3.8811	4.69297	5.56901	5.02421	4.41785	5.19731	4.78118	4.92288	5.08841	5.13761	5.1619	4.46629	5.35718	6.91937	5.33001	5.03587	4.84277	3.95873	4.54945	4.91488	4.42822	4.16473	4.96802	4.84143	4.69431	3.94614	5.03463	4.81283	5.16585	4.72926	4.62637	4.55896	4.17405	3.48767	3.73544	4.59188	4.59788
ppa_odr-7	0.986906	3.21744	2.06713	-1	-0.923496	-0.114042	-1	0.531069	1.05763	-1	3.00428	-1	-0.133358	-1	-0.419193	-1	1.08021	-0.529157	-0.363646	-0.199985	0.673642	-1	-1	-0.827818	-0.674894	-1	-0.6245	-0.573148	-1	-0.616911	-0.790644	-1	-1	-1	-1	-1	-1	-1
ppa_stranded_DN10008_c0_g2_i1	0.946851	0.945399	2.53287	0.393359	-0.947464	-0.211215	0.629477	0.890818	1.28186	0.0667892	0.743261	-0.605261	0.379705	0.00345219	0.0517206	0.974032	0.901706	-1	-1	-0.163964	1.10155	-0.72091	-0.545651	-0.371884	0.410606	-1	-1	-1	-0.285652	-1	-0.210969	-0.744445	-0.490631	-0.537871	-1	0.15381	-0.620404	-0.686838
ppa_stranded_DN10033_c0_g1_i1	9.54709	9.35613	10.3213	10.0079	9.76771	9.4681	10.0804	10.3473	10.6	10.5087	10.7517	10.1657	10.589	10.3121	10.4233	9.84868	10.4648	10.6037	10.2622	11.0326	10.7161	9.83399	9.95741	10.2687	10.7222	10.7463	10.1802	10.7794	10.3779	10.5128	10.3817	9.88348	9.97635	9.33188	10.3497	9.35239	10.0725	10.3419
ppa_stranded_DN10041_c0_g1_i1	1.45495	2.98356	3.16841	2.70863	2.15486	1.15555	1.60653	1.24296	1.82018	1.96695	1.22595	1.72708	1.20509	2.06041	1.56158	2.41114	2.08825	1.65019	1.56967	1.74433	2.00589	1.46486	1.39898	1.7306	1.83741	1.53422	1.70813	1.62936	1.6706	1.55009	1.38628	1.60563	2.39176	1.77234	1.0345	1.81407	1.98255	2.02904
ppa_stranded_DN10043_c0_g1_i1	3.19889	3.98372	4.33561	3.50464	3.74867	3.43605	3.92325	4.00897	4.18881	5.58822	3.47702	2.7934	2.8681	3.17552	3.20222	3.77642	5.31153	4.0372	3.6685	3.34148	3.83778	2.91523	2.53141	3.28449	3.08049	3.10635	2.92821	3.94016	3.56424	3.82387	3.47291	3.45587	4.3823	3.80771	3.54105	2.99795	4.37788	4.2959
ppa_stranded_DN10045_c0_g1_i1	7.11577	6.65417	2.01541	5.9804	5.70204	6.16347	6.66969	5.58196	6.88897	4.7033	6.07088	6.73822	5.47125	7.34617	5.21662	4.73752	6.05823	4.13606	5.01735	5.66666	5.55373	5.72552	5.27384	4.41234	3.99999	3.90434	4.37903	3.60556	6.03974	4.72535	5.39788	3.31545	5.08317	4.13244	2.44936	2.95156	3.71849	3.65937
ppa_stranded_DN10051_c0_g1_i1	5.07363	6.30247	6.7284	6.25608	6.75135	4.80532	5.07229	5.58635	5.7342	4.82605	5.28766	5.05597	5.06465	6.26949	5.45421	5.6413	6.29125	5.0392	5.18051	5.19588	5.5059	5.46312	5.71624	5.94287	5.89532	5.56222	5.24269	6.15191	5.58861	5.71608	5.7227	6.03397	6.21971	5.69822	5.77156	5.80696	6.56745	6.5915
ppa_stranded_DN10055_c0_g1_i1	-1	-1	-1	-1	-1	-1	-1	-1	-1	-1	-1	-1	-1	-1	-1	-1	-1	-1	-0.584345	-1	-1	0.116445	-1	-1	-1	-1	1.20603	0.421485	-1	1.61299	-0.161908	2.01813	3.43105	2.57318	1.01608	3.26468	1.27816	-0.257646
ppa_stranded_DN10061_c0_g2_i1	2.04326	-1	-1	0.594064	-0.717102	0.488519	1.57328	0.377775	0.564826	1.89409	-1	0.917339	-0.19091	-1	-1	1.18697	-1	1.36267	1.15882	1.96146	2.71392	0.5046	0.962897	2.00216	2.45655	2.88064	2.51261	3.80265	3.14865	3.49225	3.60177	4.50642	4.6278	4.488	3.60899	3.5521	4.86402	5.0233
ppa_stranded_DN10065_c0_g2_i1	-1	-1	-1	-1	-1	-1	-1	-1	-1	-1	-1	-1	-1	-1	-1	-1	-1	-1	-1	-1	-1	-1	-1	-1	-1	-1	-0.759377	-1	-1	-1	-1	0.584624	0.155245	0.480143	-0.576633	-0.0391919	-0.188038	-0.294767
ppa_stranded_DN10096_c0_g1_i1	1.48268	3.5866	2.49492	2.65386	0.917413	1.69474	1.71652	1.99051	2.30081	1.38489	3.29688	2.91176	3.09531	3.43675	1.93672	2.96932	2.42305	1.79692	2.10866	2.91291	2.11205	2.18197	0.493317	1.40027	-0.512965	0.269849	0.119902	-0.2172	1.3794	-0.158682	0.167275	-0.571551	0.320591	0.446266	-0.680885	-0.372006	0.452948	0.436645
ppa_stranded_DN10099_c0_g2_i1	5.83599	6.39149	5.28788	7.55925	5.07254	4.60258	5.44045	5.92403	6.00226	5.47533	4.84255	5.05261	5.36465	5.67542	5.48913	5.64143	5.67878	5.66193	5.27533	5.35251	4.71339	5.02827	4.31734	4.06516	4.22572	4.25556	4.40722	5.44047	4.79833	4.62959	4.94415	4.35813	5.09041	5.35665	3.82622	3.92958	5.44064	4.81353
ppa_stranded_DN10100_c0_g2_i1	-1	-1	3.45865	-1	-0.825018	0.747861	0.141455	-0.525775	1.82934	1.26998	-1	-1	-1	-1	-0.713849	0.106865	-1	-1	-1	-1	-1	-1	-1	-1	-1	-1	-1	-1	-1	1.34512	-1	-1	0.2107	0.0965243	-1	-1	-0.298977	-1
ppa_stranded_DN10119_c0_g1_i1	4.68401	4.31077	5.16077	5.37731	6.29998	4.91587	5.39325	5.74645	6.46575	5.59734	4.71305	3.93735	4.06583	4.21005	4.99325	5.74797	5.00752	6.10817	5.27145	5.73946	5.43475	4.43509	4.34301	4.88818	5.63794	5.59256	4.88664	6.00768	5.07145	5.28966	5.46738	5.72112	5.69819	6.34613	4.77434	5.29837	6.22194	6.14638
ppa_stranded_DN10146_c0_g1_i1	3.56762	2.5085	1.38231	4.65528	1.6516	3.23627	4.12548	4.45432	3.98418	3.92427	3.37164	3.41668	2.97254	3.91726	5.63391	4.83067	3.7918	3.78927	2.58275	2.68535	3.62087	3.42454	4.03764	3.95979	3.70845	3.97508	3.0961	3.94692	3.7217	2.11676	3.64997	0.205575	2.97281	2.93671	1.47523	1.48239	2.487	1.52504
ppa_stranded_DN10147_c0_g1_i1	-1	-1	-1	-1	-1	-1	-0.721576	-1	-0.0376819	-1	-1	-1	0.24504	0.362824	-1	-1	-1	-1	0.284809	-0.193689	-0.123699	-1	-1	-1	-1	-1	-1	-1	-0.495	-1	-1	-0.19803	0.172103	0.722263	-1	0.248582	0.866641	1.6292
ppa_stranded_DN10152_c0_g1_i1	2.09404	2.18583	1.56946	-1	-0.907142	-0.786591	-0.3463	0.327211	0.301352	0.979104	0.0163177	-0.606186	-1	0.216365	-1	-0.711599	-1	-1	-0.809759	-0.666357	0.31331	0.401158	-0.410249	0.111181	-1	-0.690852	-0.520811	-1	-0.407128	0.838687	-0.889744	-0.0730664	0.233182	0.620922	0.69807	-0.206967	-0.54139	-0.39088
ppa_stranded_DN10169_c0_g2_i1	0.862948	2.17673	2.58518	-1	0.433435	-0.318215	0.166795	0.827679	0.404584	0.497065	3.35718	0.528521	1.61004	0.480464	2.91788	-1	0.412591	-0.131139	-0.000519218	1.9764	0.693801	0.490986	-0.185647	-0.105504	-0.343121	0.956382	0.131244	0.248052	-0.424355	-0.341976	1.21338	-0.814335	-0.724473	-0.536916	-0.742318	-0.482087	-0.840079	-0.699278
ppa_stranded_DN10185_c0_g1_i1	-1	-1	-1	-1	-0.902232	-1	-0.057468	0.61724	0.0757445	0.0261869	-0.112259	-0.0619618	0.509889	-1	-0.619348	0.39881	1.949	1.57732	-1	-1	1.04074	-0.175661	-1	-0.734711	-0.496238	0.466695	-1	-0.585212	-1	0.605959	0.148825	-0.652925	-1	-0.37732	-1	-1	-0.869416	-1
ppa_stranded_DN10198_c0_g1_i1	2.25602	4.14608	3.79838	3.59506	4.07751	3.31266	3.20378	3.66023	4.15593	4.19268	3.19371	2.80134	3.10134	3.1812	3.24011	3.79069	3.46022	2.9715	3.60525	3.42523	3.33	3.31797	2.46916	3.38337	3.34333	3.08123	2.93074	4.26011	3.56942	3.86372	3.70901	2.86249	4.1553	4.47699	3.58481	2.81387	4.41066	3.97752
ppa_stranded_DN10218_c0_g1_i1	5.24137	5.39249	5.61667	5.56542	5.12519	4.32833	5.03859	4.8337	5.53201	5.52317	5.57568	5.67178	5.70331	6.19001	5.75738	5.44692	6.63863	5.05488	5.69096	5.27323	5.50092	4.91335	5.03039	5.50462	5.37503	5.2395	4.77249	5.56996	5.68239	5.69977	5.49469	5.1012	5.31657	4.74535	4.47554	5.42569	5.11574	5.4051
ppa_stranded_DN10240_c0_g3_i1	2.94151	3.41034	3.06435	-1	1.12103	1.75067	2.01476	2.35031	2.31861	3.16616	2.43228	1.5131	1.39465	2.39764	0.541458	2.59615	2.24134	0.791261	2.93889	1.0047	2.09239	0.822893	0.55393	1.80743	2.19709	1.79225	1.49644	2.51613	1.19563	1.97354	1.59819	2.59609	2.66389	2.6521	2.66816	2.07829	3.39613	3.61823
ppa_stranded_DN10266_c0_g1_i1	-1	-1	-1	-1	-1	-1	-1	-1	-1	-1	-1	-1	-1	-1	-1	-1	-1	-1	-1	-1	-1	-1	-1	-1	-1	-1	-1	0.565753	-1	4.77108	1.05028	6.41588	5.97779	6.54989	7.13875	6.87079	5.30371	3.01319
ppa_stranded_DN10273_c0_g1_i1	8.05806	9.24322	8.73191	8.92421	8.94043	8.45686	9.06404	8.77821	9.28662	8.76206	8.15638	8.55004	8.80153	9.13954	8.33918	9.16174	8.8606	8.01083	9.06157	9.03192	8.81122	7.81609	7.76677	8.04077	7.95226	8.17997	7.87979	7.91653	7.78715	6.92076	7.42945	6.99438	8.85835	11.3041	9.31779	7.41814	8.47372	8.029
ppa_stranded_DN10274_c0_g2_i1	4.03793	5.34199	5.61646	4.31635	2.20745	2.96371	2.67747	3.29916	3.35495	4.37241	3.61972	2.93765	3.37912	2.80468	3.80051	3.59017	3.42867	3.78926	3.61278	3.05392	3.77304	2.15379	2.44786	2.91897	2.78606	2.01639	1.85548	2.10522	1.91264	2.58391	1.86256	3.18672	1.88263	2.76347	1.41982	3.29895	1.65951	1.89324
ppa_stranded_DN10279_c0_g1_i1	2.14166	1.87267	3.14389	2.18976	1.60928	0.781713	2.0913	1.84157	2.10713	2.2146	0.764004	2.09436	2.05233	2.03682	1.31425	2.22094	2.75155	2.16892	2.62362	2.22623	2.51362	2.12846	2.12211	2.2931	2.89889	2.2637	2.01209	2.6284	2.30328	2.55201	2.01189	2.75861	2.93554	3.81545	3.03606	4.18677	3.73465	4.12235
ppa_stranded_DN10287_c0_g1_i1	5.10949	5.56594	6.02377	3.68269	4.17482	4.26937	3.75823	5.31631	4.64009	5.78516	5.58655	5.1291	5.04654	5.1046	4.35367	4.94204	4.32028	5.28655	4.756	4.65707	4.94208	3.19271	3.78826	3.65896	3.82002	3.84192	2.78882	2.85048	2.0033	4.26151	4.04852	2.59075	3.59811	4.0425	1.86118	3.97335	2.00401	3.55466
ppa_stranded_DN10293_c0_g1_i1	2.74328	3.3724	5.25449	3.57415	4.17322	2.58916	1.91625	2.35265	3.72676	1.46493	3.69021	2.48871	2.33168	3.78022	3.77097	2.94007	6.79878	2.77747	2.90853	2.83564	2.58704	2.70192	2.3447	2.75751	3.14741	1.82496	0.931954	1.84768	1.82335	1.58476	1.6805	2.0979	2.94867	3.27877	3.19501	2.5785	2.82672	2.80766
ppa_stranded_DN10294_c0_g2_i1	3.66469	3.24077	3.78544	2.31113	5.78659	2.72391	2.39827	3.4707	2.54656	3.9797	3.55447	4.07204	4.47777	4.0711	2.32564	4.05524	4.07994	3.96766	2.4733	3.68206	3.15249	3.06443	2.99853	2.08363	2.86367	1.61315	1.74111	1.997	3.26959	2.24924	2.46787	1.88132	2.44769	3.16503	3.20452	1.12052	2.32076	2.18407
ppa_stranded_DN10298_c0_g1_i1	5.77659	6.43849	5.89843	6.74415	6.46572	5.93184	6.67424	6.78005	7.22195	7.4048	6.75876	6.45287	5.79508	6.92163	6.21246	6.39993	6.56703	7.1703	6.19678	6.43401	6.38319	6.24238	6.6433	6.52511	6.67505	6.57846	6.50874	6.74495	7.43977	6.61051	6.90256	6.00096	6.60908	5.7443	6.32007	6.07818	6.40178	6.38313
ppa_stranded_DN10310_c0_g1_i1	-1	-1	-1	-1	-1	-1	-1	-1	-1	-1	-1	1.21398	0.305278	-1	-1	-1	-1	-1	-1	-1	-1	-0.3919	-1	-1	-1	-1	-1	-1	-1	-1	-1	-1	-1	-1	-1	-1	-1	-1
ppa_stranded_DN10367_c0_g2_i1	5.82962	-1	6.07265	3.12188	4.9356	4.09127	6.20178	4.08806	6.08464	6.07268	5.57687	4.95855	5.08542	4.59336	2.31747	3.33414	2.81404	3.55723	3.75724	2.66477	4.81918	3.8804	3.05077	2.15343	1.53424	-1	3.70467	2.13301	3.06148	1.50944	4.09888	5.30714	3.61986	5.55128	3.48595	-1	2.55792	3.35621
ppa_stranded_DN10378_c0_g1_i1	4.2856	3.84765	3.14031	3.36481	5.61888	3.80419	4.27689	4.32769	4.69296	4.32208	4.18946	3.62742	2.92135	4.0915	3.04452	3.05995	3.74401	3.51548	1.25733	3.13103	3.49284	2.85041	2.5494	3.12839	3.13854	2.8258	2.88581	3.54483	3.47248	3.0006	3.22677	3.44801	3.89906	4.04073	3.14464	3.31836	3.46854	3.43138
ppa_stranded_DN1039_c0_g1_i1	3.6557	-1	-1	1.52555	0.351646	2.31112	0.634424	2.01702	2.96462	1.89027	-0.341388	1.34826	0.52285	2.29388	-0.219153	1.02274	-0.016403	1.88554	0.302007	1.50684	1.50902	0.69947	1.25204	0.11943	-0.0371168	0.350379	1.46617	-0.696016	2.40991	1.22303	2.16686	0.500228	1.42742	0.180148	-0.27524	-1	-0.00348569	-0.0423042
ppa_stranded_DN10410_c0_g1_i1	10.092	10.5121	11.2292	10.4173	10.0743	9.77157	10.3876	10.4776	10.9082	11.8749	11.0958	10.6855	11.2144	10.8274	11.1837	11.1161	11.324	11.336	11.0869	11.7053	11.4877	10.5119	10.1932	10.8854	11.1416	11.1567	10.6157	11.0475	10.4275	10.7054	10.5995	10.2618	10.9632	10.7618	10.7697	11.4931	10.7834	11.1659
ppa_stranded_DN10413_c0_g1_i1	3.64451	4.24035	4.58139	-1	-1	-1	2.66139	0.986951	2.2297	-1	-1	0.480864	-1	1.3565	-1	-1	2.38801	-1	-1	1.60179	-1	-1	-1	-1	-1	-1	-1	-1	-1	1.4954	1.60973	-1	-1	1.81307	-1	-1	-1	-1
ppa_stranded_DN10438_c0_g1_i1	-1	-1	-1	-1	-1	-1	0.0658848	-1	-1	-1	-1	-1	-1	-1	-1	-1	-1	-0.617619	-1	-1	-0.558847	-1	-1	-1	-1	-1	1.44744	0.992812	0.930343	2.09737	0.608554	2.75067	2.02132	2.86822	0.293535	1.71488	1.09012	-0.605464
ppa_stranded_DN10461_c0_g1_i1	3.06969	2.82442	3.58938	4.26418	5.41006	3.43518	4.65034	5.76238	6.19104	6.1565	3.97539	4.35853	3.52062	2.82592	4.10986	3.23492	2.25329	3.4098	3.14399	2.34548	2.48284	2.57144	2.49664	1.74527	2.87193	3.34199	2.66882	3.89742	3.02048	2.16289	2.36867	2.20713	2.81858	3.63768	2.92877	3.66808	3.27948	3.44996
ppa_stranded_DN10466_c0_g1_i1	-1	-1	-1	-1	-1	0.660079	1.39949	-1	2.16691	-1	-1	1.18134	-1	1.18511	-1	-1	-1	-1	-1	0.15691	2.54976	-1	-1	1.0039	-1	0.139644	-0.224211	2.02738	1.38395	1.9545	-0.536603	-1	0.212424	-1	-1	-1	0.419393	-1
ppa_stranded_DN10470_c0_g1_i1	-1	-1	-1	-1	-1	-1	-1	-1	-1	-1	-1	-1	-1	-1	-1	-1	-1	-0.675865	-1	-1	-1	-1	-1	-1	-0.612386	-0.256023	3.21766	5.25349	4.00579	5.75481	5.38207	7.02896	6.86168	6.75141	6.32742	6.59315	5.58071	4.08759
ppa_stranded_DN10524_c0_g1_i1	2.25168	-1	-1	-1	-1	-1	-1	0.891368	1.04505	1.33726	-1	-1	1.6869	-1	-1	-1	-1	2.23821	-1	-1	-1	-1	-1	-1	-1	4.28802	7.05147	7.89171	6.33916	7.74819	7.83985	9.5327	10.3216	10.4611	9.13035	9.74983	9.33474	7.65899
ppa_stranded_DN10542_c0_g1_i1	3.74982	2.76675	-1	3.63394	2.69312	2.05622	3.20634	3.17088	3.92074	3.37563	1.78737	3.73317	2.89895	1.90651	3.03325	2.63747	2.33227	3.51103	2.78032	2.21511	2.38694	2.8673	2.22999	0.520466	1.65249	2.54067	1.36346	2.51021	2.87031	0.895183	0.597623	1.09387	2.70477	3.67253	0.328133	0.39268	2.97529	2.74907
ppa_stranded_DN10548_c0_g1_i1	2.0661	3.07609	4.34468	3.35807	2.99371	2.39093	3.18326	3.39263	3.88166	5.7709	2.82448	2.91466	3.23664	2.81897	3.95478	3.46529	5.11583	3.93074	3.42754	3.09632	2.74147	2.38745	2.685	2.64588	3.81288	3.69848	3.12689	3.46701	3.8263	3.49512	3.67837	3.90761	4.17151	4.01194	3.05224	5.60677	3.97459	4.48129
ppa_stranded_DN10620_c0_g2_i1	5.28755	5.44772	1.68387	5.7543	2.16162	3.31036	5.01603	4.34391	4.24964	4.83334	4.1791	4.49748	4.11389	4.57228	4.01997	4.42829	3.77864	4.74174	2.72367	3.93154	4.09649	4.0935	4.02318	4.18222	5.29554	4.5395	4.29647	4.97407	4.26334	5.43658	5.16247	5.97647	4.12129	5.45296	4.84285	3.92208	5.21619	5.78207
ppa_stranded_DN10647_c0_g1_i1	-1	-1	-1	-1	-1	-0.832841	-1	-1	1.29561	-0.205976	-1	-1	-1	-1	-1	-1	0.78487	-1	-1	-0.444124	-0.37298	-1	-1	-1	-1	-1	-1	-1	-0.638469	-1	-1	-1	-1	-1	-1	-1	-0.817935	-1
ppa_stranded_DN10662_c0_g1_i1	-1	5.7965	-1	-1	-1	-1	-1	-1	-1	4.76552	2.87437	2.54138	4.38787	4.79674	4.58346	3.65015	-1	-1	1.06698	2.74164	3.76938	1.54626	-1	0.948115	1.79986	-1	-1	-1	3.43026	1.49504	1.80666	-1	-1	-1	-1	3.07148	1.79701	1.35799
ppa_stranded_DN10664_c0_g1_i1	3.12453	3.20626	3.93244	3.5193	3.04045	2.99122	3.00062	3.28165	3.48564	2.34958	1.99431	3.2931	2.79763	3.60912	4.07436	3.6737	3.67592	2.73389	2.81095	2.65568	3.30236	2.91121	3.30051	3.08951	3.59357	2.59151	2.89733	3.04914	3.12836	2.81778	3.10777	2.67223	3.50397	2.4558	2.00615	2.08476	3.66368	3.88037
ppa_stranded_DN10666_c0_g2_i1	9.20482	9.65012	12.5888	9.73499	7.49944	8.95749	9.22279	9.20982	9.20479	10.0475	9.83885	8.89071	9.80538	12.4175	9.67625	10.0895	9.96671	9.91951	9.95056	9.94552	9.6521	9.50528	10.1367	10.4596	10.6301	10.8182	11.5426	10.3196	9.84967	9.70205	9.89327	9.79334	9.27954	9.14152	9.95709	10.5478	9.49581	10.6759
ppa_stranded_DN10695_c0_g1_i1	3.59874	4.69899	4.30087	3.25203	3.81434	2.28906	3.59611	3.75505	3.60997	4.0797	3.10825	2.37378	3.66227	2.89466	3.48163	4.21346	3.76541	3.62092	3.76309	3.10486	3.59116	2.98049	2.97619	2.88287	3.3036	3.70353	2.5084	3.9094	3.31756	3.57692	2.96137	3.6862	3.74238	3.43799	3.68826	2.95106	4.36734	4.47172
ppa_stranded_DN1075_c0_g1_i1	2.91445	3.37961	-1	3.11743	2.55539	1.0347	1.96598	0.773843	2.96783	2.50094	1.76674	1.40116	1.62972	2.07542	0.669307	1.56611	1.42233	-0.215827	2.11463	1.21404	1.68578	-0.27143	1.16024	0.455762	-0.0977883	0.24668	0.941517	-0.319296	0.919065	0.259757	0.683218	-1	-1	-1	-1	-1	0.0998377	0.40229
ppa_stranded_DN10753_c0_g1_i1	-1	-1	-1	-1	-1	-1	-1	-1	-1	-1	-1	-1	-1	-1	-1	-1	-1	0.63369	0.551441	-1	-1	-1	-1	-1	-1	-1	-1	-1	-1	-1	-1	-1	-1	-1	-1	-1	-1	-1
ppa_stranded_DN10760_c0_g1_i1	1.37972	-1	0.294113	-1	1.41351	-1	-1	-1	0.253106	-1	0.401295	-0.248562	0.983604	0.189325	0.870984	-0.271773	-1	0.762305	0.477841	-1	0.505662	-0.827387	-1	-1	0.0168664	0.117665	-1	-0.450695	-1	-1	-1	-0.516378	-1	-0.171883	-1	-1	-0.943538	-0.504128
ppa_stranded_DN10783_c0_g1_i1	-1	-1	-1	-1	-1	-1	-1	-1	-1	-1	-1	0.52102	0.778751	-1	0.28621	-1	-1	-1	-1	-1	-1	0.108117	-1	-1	0.817122	-1	-1	-1	-1	0.430707	1.93666	1.40884	1.35184	-1	-1	-1	-1	-0.0469891
ppa_stranded_DN10882_c0_g1_i1	-1	-1	-1	-1	-1	-1	-1	-1	5.70128	-1	-1	7.20813	-1	-1	-1	4.46825	-1	3.13269	-1	-1	-1	-1	-1	-1	3.45726	-1	-1	3.92953	4.34392	-1	2.74622	3.49608	7.08482	-1	-1	-1	-1	-1
ppa_stranded_DN10885_c0_g2_i1	3.19046	3.77038	3.71497	-1	-1	2.788	3.28436	4.25192	2.21253	2.73543	-1	2.34257	-1	2.81544	3.42122	2.16211	2.07531	0.334906	-1	3.44118	3.31119	2.24419	2.97968	3.18362	1.70744	0.726413	0.0101257	1.68053	2.35012	0.499446	0.218833	0.840945	-1	-1	-1	-1	1.3112	-1
ppa_stranded_DN10911_c0_g1_i1	3.92046	5.49787	4.04772	-1	-1	-1	-1	-1	-1	0.633719	-1	0.730798	2.7028	0.8811	-1	0.703851	-1	-1	-1	-1	-1	1.79942	-1	-1	-1	-1	-1	-1	0.862697	-1	-1	-1	-1	-1	-1	-1	-1	-1
ppa_stranded_DN10942_c1_g1_i1	-1	-1	-1	-1	1.92986	1.85009	-1	-1	-1	-1	1.21314	-1	0.335197	-1	-1	-1	-1	-1	-1	-1	-1	-1	-1	-1	-1	-1	1.38442	-1	-1	-1	-1	-1	-1	-1	-1	-1	-1	-1
ppa_stranded_DN10949_c0_g1_i1	1.39058	1.47756	1.78749	-1	0.240065	0.215638	0.272178	-0.018553	1.09452	1.29989	-0.0908132	-0.214549	0.521628	-0.118672	1.00295	0.901243	0.570349	1.51725	1.03523	0.880774	0.948452	0.305542	-0.141788	1.20878	0.721117	1.22701	0.977635	0.621454	-0.108021	-0.394889	-0.0326253	0.578183	-0.125301	0.614713	0.268524	0.959297	0.307574	1.0172
ppa_stranded_DN11011_c0_g1_i1	-1	1.56446	-1	-1	-0.825018	0.890723	-0.0869	0.722219	5.84221	5.29242	-1	-1	-1	-1	-0.475169	-1	-0.0548446	0.689509	2.28862	0.266742	1.65588	0.196785	0.443593	0.233095	0.831437	-1	3.98025	4.68363	1.17493	0.524827	1.6654	0.635954	-0.30397	-1	1.96552	0.426277	0.0098595	0.52432
ppa_stranded_DN1105_c0_g1_i1	-1	-1	-1	-1	-1	-1	-1	-0.218963	-1	-1	-1	-0.559714	-0.027569	0.491263	0.830974	-1	0.00488224	-1	0.144799	-0.248378	-1	-0.12141	0.629569	-0.603386	0.796665	0.168899	3.07564	0.0661029	-1	-1	-0.613246	0.400777	-0.588832	3.92149	-0.30816	-0.0730805	-0.300123	0.90102
ppa_stranded_DN11082_c0_g1_i1	4.08658	5.73725	-1	4.91411	-0.528186	2.8714	3.37407	2.64339	1.86413	4.09278	6.50666	3.49303	3.36068	1.87838	1.98526	3.29426	3.21068	1.80909	2.14122	2.82468	3.66828	2.53991	3.38039	3.83402	2.16863	2.81016	-1	-1	1.49108	2.29987	3.62503	0.549066	2.50937	2.36415	-1	-1	1.00101	2.17823
ppa_stranded_DN1110_c0_g1_i1	-1	-1	-1	-1	-1	-0.458673	-0.525144	-0.338468	-1	-1	-1	-0.49918	-1	-1	-0.502666	-1	-1	-1	-1	-1	0.286496	-1	-1	-0.376602	-1	-1	-1	-1	-0.302125	-1	-1	-1	-0.405479	-1	-0.667668	-1	-0.030463	-0.433472
ppa_stranded_DN11105_c0_g1_i1	-1	2.35524	-1	-1	-1	-1	-0.237287	-1	0.889094	-0.315417	0.126889	1.00142	1.7016	1.19506	0.266861	-0.311965	1.77165	0.330733	-0.822289	-0.233784	0.38437	0.00158448	-0.0166884	-1	-0.292615	-0.310403	1.40985	2.64079	2.69376	2.98007	2.98653	3.54	4.26478	4.14542	2.42318	2.9435	1.71086	0.392898
ppa_stranded_DN11111_c0_g2_i1	1.68264	0.526597	3.40246	3.22846	0.174935	0.547491	1.44997	2.51292	3.57511	2.96487	0.128908	0.698041	1.24838	1.35646	3.68781	0.812113	5.10069	2.39445	0.806529	0.875927	0.332776	0.0195876	-1	-1	0.577702	0.771552	0.716315	1.45446	-0.0209177	0.837031	0.134064	0.32707	0.474626	0.666596	1.18137	0.145541	0.369682	-0.57817
ppa_stranded_DN11128_c0_g1_i1	0.198145	-1	-1	0.638333	0.363155	0.0261928	0.829087	0.995596	2.18543	1.10196	2.73716	-0.0654485	-0.149641	0.233183	2.04743	1.23955	-1	1.35871	1.15459	-0.506619	-0.205874	-1	-1	-0.754313	0.11187	-0.0135076	-0.345225	1.388	1.26685	-0.0870709	-0.0792439	-0.00616125	-1	-1	-1	-1	-0.823128	-0.0564367
ppa_stranded_DN11146_c0_g2_i1	5.16822	3.75687	6.43924	5.7723	5.01218	3.89038	3.94684	4.36982	6.1661	4.18244	5.39048	5.21618	4.96995	4.0693	2.75417	4.26601	3.95696	5.176	4.31471	3.87966	3.88439	2.44521	4.00117	4.11568	3.75271	2.54876	3.40228	4.11462	2.05758	2.42152	3.06597	3.93653	3.64497	4.08322	6.58204	4.51767	4.29482	2.6489
ppa_stranded_DN11228_c0_g1_i1	1.47079	1.49046	3.33193	0.975449	-0.317679	0.273367	-0.408262	1.11568	1.90308	0.466023	0.328679	0.358901	0.697686	0.581434	1.35289	0.317678	0.645459	0.454304	1.22734	-0.128439	0.573198	-0.347395	0.313817	0.76301	0.111818	0.0823643	1.49132	1.29378	0.472708	0.462438	-0.131001	-0.391219	-0.378581	-1	-1	0.0733189	-0.3509	-0.17594
ppa_stranded_DN11330_c0_g1_i1	3.37885	4.21535	3.79025	2.92006	0.768448	2.45437	2.28669	2.49186	2.37357	2.58401	2.50548	2.3745	2.90826	2.91371	2.36317	3.46864	3.70325	2.84397	2.5349	2.02435	3.15061	2.75669	2.50636	2.80619	3.39149	3.05724	2.31942	3.02073	3.00697	3.11062	3.22765	2.90455	3.21161	3.25586	3.75446	2.74558	3.68651	4.19309
ppa_stranded_DN11333_c0_g2_i1	0.758166	-1	-1	-1	-1	0.418817	0.850252	0.553755	1.09915	0.206803	0.94369	-0.659095	-1	0.0611695	2.32489	1.29951	-1	-0.0489131	0.0844079	-0.572417	1.12846	-1	-1	-0.576164	0.19717	0.0599951	-1	-0.378515	-0.849142	-1	-1	-1	-0.560249	-1	-1	-1	-0.943538	-1
ppa_stranded_DN11342_c0_g1_i1	8.31664	8.64157	11.1934	8.28189	6.23566	7.09531	7.48951	7.18438	7.49935	8.26895	7.74603	7.21744	7.85535	9.78989	7.84574	7.73609	7.6539	7.79226	8.00614	7.2512	7.35954	7.74247	8.29837	8.74062	8.46823	8.24554	10.0619	8.22119	8.13	8.26422	7.82705	7.90843	7.0319	7.02808	6.80314	7.93251	7.22193	8.36588
ppa_stranded_DN11357_c0_g1_i1	-1	0.997322	-1	-1	-1	-1	0.214145	-1	0.224074	-1	-0.0453314	-0.169583	-1	-0.383078	-1	-1	-1	-1	-1	-1	0.377766	-1	1.15117	0.240765	-1	-0.0894297	-1	-1	-0.162042	-1	-1	-1	-1	-1	-1	-1	-0.721405	-1
ppa_stranded_DN11375_c0_g1_i1	2.46827	3.05619	3.87579	1.63363	2.19123	3.04929	2.4602	2.71204	2.54382	3.71234	2.31853	3.0953	2.34467	1.42626	1.73399	2.40386	3.10811	2.75828	2.3556	1.64521	2.5063	1.37602	1.16356	2.01165	2.6743	2.54464	-0.117327	0.928685	1.50171	0.683599	-0.361446	1.47308	0.713929	0.480191	-1	-1	-0.10306	0.344149
ppa_stranded_DN11386_c0_g1_i1	-1	1.67668	-1	-1	-1	-1	-1	-1	-0.334952	-1	1.67262	0.831357	-1	0.354466	-1	0.794879	-1	-1	-1	-1	2.08697	-1	-1	1.80159	-1	-1	-1	-1	-1	-1	-1	-1	-1	-1	-1	-1	-0.908529	-1
ppa_stranded_DN11456_c0_g2_i1	1.96856	2.95675	2.33668	2.6314	2.4106	1.3988	2.30078	3.04568	4.48052	3.3588	2.652	2.64052	2.43174	2.63625	3.40738	3.72323	2.27176	3.61588	2.33021	3.07729	2.76238	2.56255	2.05217	2.7315	2.75761	2.80356	3.70185	4.12539	4.70725	3.94643	4.30339	3.84108	4.85834	4.79023	2.42055	2.49556	4.43936	4.43816
ppa_stranded_DN11460_c0_g1_i1	-1	-1	-1	-1	-1	-1	-1	4.35852	4.12651	5.28844	0.561361	-1	0.722334	-1	0.846534	-0.00709545	-1	4.53835	-1	-0.218991	-0.0925593	-1	-1	-0.820134	-1	0.938834	2.84337	-0.0728626	-0.881128	1.33582	-1	-1	-1	-0.237458	-1	-1	-0.831896	-0.110867
ppa_stranded_DN1147_c0_g1_i1	2.07102	3.0282	3.98202	1.5487	1.43557	1.43336	1.89131	2.57541	2.69851	2.33669	2.48218	2.61498	2.34366	1.9525	1.08764	2.62133	1.71564	1.4978	1.77059	2.10672	1.35489	1.74817	1.02249	0.461523	0.314616	0.799396	0.352347	1.21402	1.4056	0.668762	1.31182	0.74796	1.46272	1.31239	0.52884	0.500026	1.0226	0.395892
ppa_stranded_DN11507_c0_g2_i1	0.393826	-1	0.424735	0.0900491	-1	-0.0179296	-0.165738	0.794493	1.02386	1.01792	1.75068	0.196036	1.76669	1.47928	1.13993	2.69933	-1	2.03183	1.901	0.997585	1.45275	1.09067	-1	1.27305	1.05989	1.21489	-0.251488	1.74861	1.94359	1.91384	1.84778	2.70777	2.8487	2.76236	1.49986	2.24686	3.00844	2.9343
ppa_stranded_DN11551_c0_g1_i1	3.84256	6.35405	-1	-1	3.80079	3.53482	4.28787	6.42605	7.9034	6.59269	5.81212	5.63258	5.18151	4.5481	3.35516	4.12179	4.36229	4.91055	5.98007	5.83966	4.6988	3.36037	2.45664	1.06902	3.61026	3.37871	5.15921	5.44177	6.27708	4.02673	4.89559	1.3494	-1	-1	-1	-1	2.32216	1.38255
ppa_stranded_DN11605_c0_g1_i1	-1	-1	-1	-1	-1	-1	-1	-1	-1	-1	-1	-1	-1	-1	-1	2.39978	-1	-1	-1	-1	-1	-1	-1	-1	-1	-1	6.14795	-1	-1	-1	-1	-1	-1	-1	-1	-1	-1	-1
ppa_stranded_DN11605_c1_g1_i1	2.17841	-1	-1	-1	2.54827	2.03972	-1	-1	-1	0.545339	-1	0.310866	0.512333	-1	1.49632	2.54531	3.04931	2.2079	2.84718	-1	-1	0.36328	-1	0.890768	-1	0.41498	0.626925	0.963334	0.08793	-1	0.687521	1.08818	0.192929	-1	-1	-1	0.0107541	-1
ppa_stranded_DN11650_c0_g1_i1	5.07258	3.22959	5.91646	3.65226	3.08639	2.87133	2.62171	4.56438	2.98981	4.80393	4.52192	4.71765	4.63888	3.99763	2.28361	3.68715	3.95885	2.94594	2.8955	2.70737	3.79583	3.1205	4.19797	3.79139	3.99255	3.01183	3.56245	1.44698	1.88965	3.17644	3.65545	4.5379	4.39452	5.14149	4.19047	3.74234	3.49714	3.17077
ppa_stranded_DN11659_c0_g2_i1	-1	-1	-1	-1	-1	-1	-1	-1	-1	-1	-1	-1	0.0515267	-1	-1	-1	-1	-0.279746	-1	-0.143339	-0.604469	-1	-1	-1	0.0169346	-0.248501	-1	-1	-1	-1	-1	-1	-1	-1	-1	-1	-1	-1
ppa_stranded_DN11692_c0_g1_i1	3.69116	5.10103	4.62726	3.51853	3.31782	4.01907	5.16389	5.04561	3.83055	3.71808	5.62427	4.56442	4.12317	4.79784	4.45363	4.43904	4.47163	4.95524	3.85373	2.99378	2.82146	3.92639	3.56105	4.5343	5.03407	4.44024	4.49885	4.2411	4.32261	4.43892	3.91925	2.90965	3.85515	4.40089	6.87717	5.61972	4.66887	4.62616
ppa_stranded_DN11705_c0_g1_i1	7.40209	9.07453	8.10758	8.67405	8.03922	7.44342	7.64499	7.52369	8.69134	9.19781	8.27894	7.88857	7.98553	8.95336	7.43247	4.08027	5.37964	2.95614	0.928649	2.67964	4.41674	5.53037	5.65557	4.52066	2.94115	2.16514	2.67418	0.426133	2.77709	3.59602	2.86512	2.93929	7.79212	5.28346	4.49858	5.00327	5.77452	5.65727
ppa_stranded_DN11722_c0_g1_i1	-1	3.41326	-1	-1	-0.971086	-1	1.16813	-0.24955	0.302931	1.53431	1.84288	0.620715	1.01782	0.608208	-1	1.62099	0.504689	0.418705	-1	-1	1.18713	-1	1.58412	0.258775	0.331404	-0.15686	0.0839529	-0.605313	-0.125735	-0.127627	-0.18976	-1	-1	-1	-1	-1	-0.423657	-0.527155
ppa_stranded_DN11767_c0_g1_i1	3.32142	4.64287	4.30641	4.47662	3.94226	3.32786	3.64443	4.36611	4.56562	4.22802	3.60467	3.6646	3.48292	4.08174	3.60469	4.04642	3.76214	4.0127	4.52154	3.53646	3.79595	3.48617	2.97227	3.42692	4.27486	3.51063	3.80888	4.13428	3.95592	3.97573	4.0354	4.64281	4.42598	4.42836	3.77965	3.70313	4.85245	4.86328
ppa_stranded_DN11778_c0_g1_i1	2.05104	3.2257	4.26912	1.15783	0.841548	0.591858	0.593629	1.45605	4.30018	6.20506	3.15386	3.58626	2.99293	1.66512	1.99843	2.67723	1.57867	1.98768	2.56256	2.57529	2.34038	1.897	1.62547	2.05382	1.4621	2.52927	1.3736	3.11969	2.71383	2.85786	2.69305	1.45743	1.41462	1.79093	0.800811	1.88915	0.874204	0.142951
ppa_stranded_DN1179_c0_g1_i1	5.18431	-1	-1	3.57218	-1	-1	1.34005	-1	-1	-1	-1	1.52062	2.10771	-1	-1	-1	-1	-1	-1	-1	-1	-1	-1	-1	2.3645	-1	-1	-1	-1	-1	0.351664	-1	0.931593	-1	-1	-1	-0.598595	-1
ppa_stranded_DN11884_c0_g1_i1	3.78444	4.66265	5.73159	5.13873	4.77132	4.44521	4.50225	4.11222	4.43274	4.73969	4.46511	4.30079	4.16851	5.03392	4.21805	4.76234	4.76718	4.15537	4.3054	4.54321	4.33104	3.985	4.20796	3.89353	4.34731	4.32964	4.45426	4.82932	3.90275	3.9354	4.35966	3.52139	4.8397	5.47421	6.64284	5.25627	4.91436	5.44341
ppa_stranded_DN11895_c0_g1_i1	8.18378	8.49409	8.71412	8.6667	7.77223	7.89652	8.35326	8.48908	8.81875	9.16241	8.66074	8.29469	8.22937	8.84475	7.91161	7.69085	8.64399	8.07169	7.89276	8.14902	7.58845	7.35385	7.9669	8.13306	8.21903	8.19622	7.96417	8.17132	8.09813	8.04683	8.03606	7.39113	8.1766	7.64708	8.88985	7.71955	8.24189	8.48949
ppa_stranded_DN11896_c0_g1_i1	2.07516	3.3194	1.37771	1.73428	0.692211	0.390113	1.97335	2.09519	2.08968	3.02949	-1	0.972713	2.31011	2.11072	4.03186	2.46872	0.799441	2.41008	1.17392	2.19796	1.86413	0.965638	1.41671	0.447664	1.30751	1.6342	0.801746	1.29013	1.44545	1.55208	1.99628	1.96655	2.88387	3.11398	1.67038	1.88299	3.0055	2.50214
ppa_stranded_DN11915_c0_g2_i1	-1	-1	-1	-1	-1	-1	-1	1.82464	1.21288	1.02096	-1	-1	-1	-1	-1	-1	-1	0.951363	-1	-1	-1	-1	-1	-1	-1	-0.190951	1.15329	0.214788	-1	-1	-1	-1	-1	-1	-1	-1	-1	-1
ppa_stranded_DN11935_c0_g1_i1	5.20617	5.47481	4.03142	5.77312	5.25115	5.01209	5.32972	6.05666	6.89865	6.38533	5.52447	4.74894	4.14084	4.17338	4.20517	5.57027	5.44947	5.95558	5.13082	5.47354	4.32889	4.49584	4.42065	4.37462	5.33801	5.53914	4.89443	6.03826	5.52396	4.78698	5.18547	5.10806	5.35024	6.03178	5.9138	5.35441	5.73382	5.7328
ppa_stranded_DN11943_c0_g1_i1	2.52939	-1	-1	-1	-1	1.61827	-1	2.13804	-1	-1	-1	-1	-1	-1	-1	-1	-1	-1	-1	-1	-1	-1	-1	-1	-1	-1	-1	-1	-1	-1	-1	-1	-1	-1	-1	-1	-1	-1
ppa_stranded_DN11969_c0_g1_i1	-1	1.8358	-1	2.9707	1.22608	1.26152	1.13943	1.52515	1.51925	1.789	2.15279	0.185885	1.22479	-1	-1	0.430954	-1	0.964204	1.00378	0.391353	0.0704637	0.0978051	0.195249	1.58626	-0.315971	0.145902	-1	0.596084	-1	0.670575	0.0736646	-1	-0.0474761	-1	-1	-1	-0.656242	-0.27239
ppa_stranded_DN1205_c0_g1_i1	3.96478	3.30045	3.61443	4.01942	4.02884	3.31366	2.60071	3.54732	3.91037	4.4353	3.09159	2.70531	3.12345	1.80791	2.56903	2.6988	3.41036	2.34936	2.22415	2.42221	2.51148	3.07205	3.35475	2.41113	2.28123	2.11555	2.65634	2.16024	2.14127	2.47019	3.12156	2.27789	3.37737	3.81791	2.42678	3.79213	3.04313	3.12383
ppa_stranded_DN12053_c0_g1_i1	-1	-1	-1	-1	-1	-1	-1	-1	-1	-1	-1	-1	-1	-1	0.979596	-1	-1	-1	-1	-1	-1	-1	0.774547	-1	-1	-1	-1	-1	-1	-1	0.340671	-1	-1	-1	-1	-1	-0.673604	-1
ppa_stranded_DN12056_c0_g1_i1	-1	1.49688	-1	1.32425	-1	-1	1.43019	-1	-1	0.521118	-1	1.001	-1	-1	0.866779	-1	-1	0.404011	-1	-1	3.08299	-0.412922	1.76507	1.94588	0.279746	-1	-1	0.0744737	0.905488	0.681025	0.616964	-1	-1	-1	-1	0.997901	-0.26236	-1
ppa_stranded_DN12067_c0_g2_i1	-1	-1	-1	-1	-1	-1	-1	-1	-1	-1	-1	-1	-1	-1	-1	-1	-1	-1	-1	-1	-1	-1	-1	-1	-1	-1	-1	-1	-1	-1	0.191946	0.807952	2.20943	1.6699	-1	-1	1.26055	-1
ppa_stranded_DN12070_c0_g1_i1	2.7058	4.64669	4.10245	4.34988	3.47831	3.50554	4.37456	4.26994	4.36642	4.32975	2.99401	3.42705	2.96954	3.68486	3.41819	4.13051	4.11811	3.95249	4.3993	3.4079	3.88792	3.25362	3.34696	3.46344	2.62253	3.32676	2.60735	3.26498	3.28981	3.4984	3.77739	3.71995	4.2297	3.58455	4.87067	4.36641	4.5231	4.36493
ppa_stranded_DN12118_c0_g1_i1	-1	3.40272	-1	-1	2.69045	2.15299	2.44558	5.24022	1.02669	3.02724	-1	-1	-1	-1	0.832678	-1	1.40882	1.93528	-1	-1	1.66137	0.209519	-1	0.490338	2.70904	1.89262	0.143277	-1	-1	-1	-1	0.380032	0.967502	1.33066	5.66294	-1	0.498806	-1
ppa_stranded_DN12139_c0_g1_i1	2.33263	-1	-1	-1	-1	0.216145	-1	-1	1.10304	-1	0.483533	-1	-1	-1	2.64311	-1	1.12815	0.211475	-1	-1	-1	-0.368185	-1	-1	0.908328	-0.395687	-1	-1	-1	-1	-1	1.61868	2.63085	4.19022	6.0007	5.6967	6.77985	5.946
ppa_stranded_DN12152_c0_g1_i1	2.29015	5.51128	4.39698	3.50494	3.15387	1.83201	2.45003	2.51849	1.8622	-1	1.24055	3.24685	2.80238	2.24628	4.19696	2.19476	1.53334	2.2766	1.62295	0.70034	2.18836	-0.115278	0.934713	2.8297	2.15644	1.28284	0.956616	-1	2.01388	1.8372	0.485063	1.77148	0.874513	-1	0.837889	-1	0.833362	-1
ppa_stranded_DN12199_c0_g1_i1	-1	-1	-1	5.47955	-1	5.95343	-1	-1	5.7059	5.56386	-1	5.03127	5.6419	4.7556	1.65888	4.44685	-1	1.79802	2.13928	2.37698	3.44502	-1	-1	-1	2.24907	2.40271	4.39229	5.78285	7.00024	7.72765	8.27953	6.79211	6.92077	7.47905	5.645	6.42805	4.63967	3.86238
ppa_stranded_DN12213_c0_g1_i1	-1	-1	-1	-1	-1	-1	0.919794	-1	-1	-1	-1	-1	-1	-1	-1	-1	-1	-1	-1	-1	-1	-1	-1	-1	-1	-1	-1	0.511845	-1	-1	1.82058	2.10525	2.92089	2.35728	0.893345	0.55307	0.939755	0.0565338
ppa_stranded_DN12218_c0_g1_i1	0.103585	-1	-1	-1	-1	-1	-1	-1	-1	1.10964	-1	-0.275096	-1	-1	0.0593685	0.526508	-1	-1	-1	0.146403	-1	-1	0.313761	-0.810801	0.304007	-1	-1	-0.178677	-0.874869	-1	-0.537961	-0.592236	0.604388	-1	-1	-1	-1	-1
ppa_stranded_DN12219_c0_g1_i1	-1	-1	-1	-1	-1	-1	2.52208	6.43859	2.25157	6.69461	-1	0.475309	-1	-1	-0.255124	-1	5.73665	6.24518	-1	-1	-1	-1	-1	-1	-1	4.37947	-0.775273	-0.614599	0.774303	1.14613	-1	-1	-1	-1	-1	-0.0212826	-1	-0.652586
ppa_stranded_DN12267_c0_g1_i1	0.377261	-1	-1	-1	-1	-1	-1	-1	-1	-1	-1	-1	-1	-1	-1	-1	-1	0.037118	-1	-1	0.0180006	-1	0.306321	-1	-1	-1	-1	-1	-1	-1	-1	-1	-1	-1	-1	-1	-1	-1
ppa_stranded_DN12271_c0_g1_i1	4.08517	2.00984	4.22681	2.22564	2.46936	3.09249	2.52864	1.14029	3.02634	1.29466	1.40639	2.97019	3.19451	2.18193	2.46178	3.87531	2.55727	2.13889	3.77586	2.39023	1.87644	1.77036	2.52902	1.94979	2.20545	2.2028	2.05303	2.1	1.96	0.627734	1.23594	2.33271	0.700969	-1	7.00144	1.85568	1.42298	1.0226
ppa_stranded_DN12272_c0_g1_i1	-1	-1	2.46933	1.61297	2.11705	0.695292	1.45096	2.93127	4.59321	1.84575	0.959465	-1	0.831163	1.54528	-0.710951	1.09918	1.60797	2.57273	3.43823	1.55094	1.24724	1.89799	0.702548	1.76301	1.42287	1.76913	4.39738	2.38591	-0.309767	-1	0.483243	-1	-1	-0.140607	-1	-1	-0.231467	0.0543457
ppa_stranded_DN12322_c0_g1_i1	8.89493	9.50075	10.2279	9.30288	8.89475	8.8082	9.39637	9.36948	9.60572	10.1303	9.6536	9.32348	9.64704	9.92283	9.33651	9.72944	10.4044	9.74476	9.50518	10.1067	9.81879	9.06464	8.7656	9.40686	9.5181	9.61331	9.3076	9.40093	8.60587	8.8776	8.93072	8.97843	9.7714	9.5556	9.76802	9.87077	9.75387	9.98759
ppa_stranded_DN12331_c0_g2_i1	2.91531	2.97165	5.64748	3.43533	2.08067	2.25805	2.66971	3.04423	3.38516	3.12871	3.86835	2.37839	2.323	2.14535	1.87842	1.76097	1.95786	2.1365	2.25818	1.84245	1.53883	1.97228	2.00274	2.02148	1.70428	1.96314	2.94542	2.90228	1.34239	2.51004	2.96581	3.85818	4.84851	4.84519	4.28124	3.09506	4.08264	2.86413
ppa_stranded_DN12347_c0_g1_i1	-1	3.52555	3.13041	-1	-1	-0.191493	0.141175	-0.583573	-1	0.121101	-1	-0.241564	-1	0.725835	-0.0309994	0.207763	1.90301	1.46384	-1	0.855303	-0.104646	-0.543498	0.706321	-1	0.0905794	-0.0830832	-0.920478	-0.00974836	-0.622106	-1	-0.641665	-0.309954	-0.0314388	-1	-1	0.564814	-0.181182	0.141961
ppa_stranded_DN12359_c0_g2_i1	2.33347	3.00638	2.32235	1.47699	1.17762	1.38763	1.16311	0.948952	1.60535	2.91404	1.26217	1.96941	1.71077	1.60724	1.78263	0.569341	2.25297	2.66905	0.67439	1.00206	1.61756	0.971012	2.21249	1.04692	1.72599	1.25906	0.691881	0.414017	2.00033	1.13414	2.05567	0.539324	0.185796	0.0502359	0.746499	1.36467	0.126125	1.01739
ppa_stranded_DN12367_c0_g2_i1	3.2558	4.45961	3.67522	6.7509	5.59533	4.54281	5.08946	4.81804	5.3898	4.8149	4.37501	4.66377	4.36245	5.32687	5.23679	5.28536	4.76064	4.88052	4.40187	4.50139	4.69721	4.83285	4.88096	5.25907	5.4807	4.9971	4.81339	5.75654	5.26004	4.88141	5.24822	5.00738	5.07708	4.96857	5.61671	4.97859	5.25843	5.26888
ppa_stranded_DN12373_c0_g1_i1	0.0542558	-1	-1	-1	-1	0.48777	-1	-1	0.451087	-0.23011	0.220092	-0.718494	-1	0.554005	-1	-1	-0.266734	-0.677495	-0.796156	-1	-1	-1	-0.401876	-0.133607	0.32556	-1	-1	-1	-1	-0.755107	-1	-1	-1	-1	-1	-1	-1	-1
ppa_stranded_DN12374_c0_g1_i1	4.44419	4.81511	5.59687	5.63248	4.63934	5.08403	4.80253	5.4027	5.68751	5.29447	5.2816	4.75174	4.71879	4.62901	4.93197	5.26296	5.11551	5.10113	4.37073	5.48237	5.24643	4.43179	5.19515	5.35195	5.93432	5.52826	5.04128	5.24438	5.63794	6.0016	5.89291	5.99851	5.62423	6.04152	6.10783	5.66223	6.20119	6.34527
ppa_stranded_DN12376_c0_g2_i1	-0.00796494	0.112461	-1	-1	-0.898961	-0.235135	-1	-0.567758	1.96779	-1	0.691133	0.0177794	0.139161	0.641924	-0.875371	-0.61304	-1	0.748164	0.707873	0.154433	0.374413	-1	-1	0.0647393	0.624282	-0.572259	0.769208	-0.139602	0.492461	1.11133	0.763652	-0.0381433	0.551022	0.881749	-0.447706	-1	0.391808	-0.470353
ppa_stranded_DN12382_c0_g1_i1	1.42355	4.11986	3.08656	3.63808	3.12361	2.71057	2.73599	3.48023	3.60329	1.97751	3.06725	2.97535	2.67642	3.69554	4.2204	3.27818	5.03499	2.93522	3.00786	2.95098	2.83451	3.01035	3.1767	3.89353	3.53396	3.31053	3.24379	3.34708	3.41479	3.07589	2.75978	3.41746	3.27767	3.0502	2.70775	3.15892	3.99423	3.96913
ppa_stranded_DN12397_c0_g1_i1	2.15624	3.19977	2.19286	3.30766	2.30607	2.04445	1.18295	1.22582	2.19699	0.72172	1.04358	0.715297	2.40308	0.422891	0.62944	0.362346	-1	0.707679	-0.427122	-0.397562	-0.64122	-1	0.240846	-0.110418	-0.569249	-1	-0.938858	-0.664569	0.353028	-0.689699	-0.445541	-0.444582	0.615512	-0.452185	-1	0.693556	-0.410735	-0.0861296
ppa_stranded_DN1243_c0_g1_i1	0.660144	-1	-1	-1	-1	-1	1.34245	-1	-0.0604512	-1	-1	-1	-1	-1	-1	0.228702	-0.356714	-1	-1	-1	-1	-1	-1	-1	0.0851829	-0.541769	-0.306933	-1	-1	-1	-1	-1	0.741339	-1	-1	-1	-0.913203	-1
ppa_stranded_DN12437_c0_g1_i1	3.65056	4.07764	-1	-1	4.3123	-1	-1	-1	-1	-1	-1	-1	-1	-1	-1	-1	-1	-1	-1	-1	-1	0.694527	-1	-1	-1	-1	-1	-1	2.40424	-1	2.8474	-1	-1	-1	-1	-1	-1	-1
ppa_stranded_DN12438_c0_g2_i1	4.17897	2.80954	-1	2.65034	1.04088	2.76234	2.26252	3.11768	3.82443	3.59646	4.65021	3.60247	3.28545	3.69223	2.41626	3.40115	1.99175	1.45457	2.42393	3.9429	2.89925	1.84963	2.20389	2.71505	1.84103	1.49986	0.719845	2.20587	2.81656	1.74404	2.16369	2.72903	1.79862	1.81776	1.70089	1.52742	0.871656	0.245042
ppa_stranded_DN12463_c0_g1_i1	1.77014	2.57485	4.50059	3.55906	2.75928	2.54647	3.7418	2.38369	3.25366	3.94484	1.69477	2.34703	1.93989	3.97254	2.6706	3.83559	1.98864	3.96791	2.73196	2.60478	3.26873	2.19645	3.19738	3.31861	3.83804	3.86926	3.18614	3.90391	2.1473	2.76196	3.06608	4.23851	4.22487	4.05935	3.59067	4.99446	4.86187	4.619
ppa_stranded_DN12488_c0_g1_i1	2.22576	2.30115	3.01885	3.47272	0.084848	1.36719	2.47619	2.35577	2.26473	3.10388	2.1511	2.07029	1.74236	3.02762	2.29203	2.70585	3.09178	2.76877	1.73114	2.34092	2.54969	2.29084	1.49388	2.95145	3.43367	3.37144	2.56845	3.79736	3.12436	3.74476	3.01151	3.96531	3.67026	4.14745	3.4689	4.241	4.78168	5.31293
ppa_stranded_DN125_c0_g1_i1	13.1171	13.0021	12.4453	12.8749	11.9229	12.8905	13.8282	12.872	14.0197	13.3091	12.6798	13.2614	12.2058	12.8342	11.9925	13.2661	13.2782	12.7581	12.1094	13.2181	13.238	13.1929	12.882	12.9705	12.4707	12.3876	13.027	11.9125	12.0281	11.414	12.1949	11.8586	12.5678	13.1301	12.2527	11.4566	12.608	12.0525
ppa_stranded_DN12515_c0_g2_i1	3.70377	5.55838	2.86194	5.75551	4.91071	4.75715	4.33374	4.29022	4.97628	6.45745	4.7301	3.82094	5.03299	3.70374	4.55177	4.14499	4.29129	4.49971	5.04783	4.21852	3.94396	3.27799	3.19321	3.26496	3.85136	3.54244	4.37838	3.59484	4.44761	3.46051	4.30645	3.66597	5.21469	6.98772	3.87612	4.85273	5.28251	4.9389
ppa_stranded_DN12568_c0_g2_i1	2.55157	6.65448	5.56758	-1	2.46662	2.63404	3.24311	2.70971	6.80474	5.67023	3.87036	3.27155	3.77501	2.5161	2.87504	-1	-1	5.14023	3.61797	-1	-1	0.858891	1.83133	3.43066	1.79365	-1	5.42852	3.35289	2.23058	1.75586	2.53147	1.01385	-1	2.07266	-1	-1	-0.444974	-1
ppa_stranded_DN12575_c0_g1_i1	-1	-1	-1	-1	-1	-1	-1	-1	6.10284	-1	-1	-1	-1	-1	-1	-1	-1	-1	-1	-1	5.18032	-1	-1	-1	-1	-1	-1	-1	4.86714	2.30684	4.09593	-1	-1	-1	-1	-1	2.80221	-1
ppa_stranded_DN12609_c0_g1_i1	4.82125	4.78844	4.83307	8.1998	5.4939	5.0263	5.37604	5.39988	5.66621	7.18827	5.50223	5.28105	5.18348	5.51873	5.42761	5.29005	5.57324	5.28156	5.08032	5.05324	5.01226	4.79111	5.57031	5.63356	5.423	5.67491	4.78862	5.24209	4.97427	4.55252	5.20793	4.7207	4.92978	5.45727	5.05793	5.40391	5.36945	5.43856
ppa_stranded_DN12634_c0_g1_i1	1.52036	1.98457	3.65975	2.15616	0.35873	1.00324	2.13151	2.68767	1.79177	2.38294	3.14784	1.30281	1.84363	1.33518	-0.258598	2.05941	1.26366	2.35382	1.79343	1.40103	1.90601	2.30165	2.26018	2.30525	3.91997	3.79924	3.07208	4.88773	3.67557	4.63245	3.96405	4.2664	4.23284	4.17587	4.87789	3.7803	5.51975	5.71776
ppa_stranded_DN12650_c0_g1_i1	-1	-1	-1	-1	-1	-1	-1	-1	-1	-1	1.63898	-1	-1	-1	0.993011	-1	-1	-1	-1	-1	-1	0.221071	-1	-1	-1	-1	3.0315	3.94823	4.58575	-1	-1	-1	-1	-1	-1	-1	-1	-1
ppa_stranded_DN12664_c0_g1_i1	0.971881	-1	4.54803	-1	2.03763	1.79492	2.46477	2.72565	3.26613	3.2904	4.18171	3.17164	3.31631	3.75499	4.18395	4.14643	4.39923	3.04205	4.04357	3.9863	4.15269	4.21481	3.44629	4.4064	4.77266	4.64118	4.91458	5.6063	5.18705	5.57299	5.44183	5.81787	6.31341	6.23708	5.8466	5.78027	6.7042	6.84848
ppa_stranded_DN12719_c0_g2_i1	1.96477	-1	-1	-1	2.30073	1.29875	2.14352	1.75152	1.60355	1.66793	2.44251	2.20003	0.645461	1.82085	-1	1.27421	-1	0.422864	-1	0.978088	-1	0.581759	1.72767	-0.419376	2.07936	1.29086	2.91041	0.860268	0.372196	1.08089	0.980087	-1	-1	-1	-1	-1	-1	-1
ppa_stranded_DN12725_c0_g1_i1	-1	-1	-1	-1	-1	-1	-1	1.40028	1.33092	-1	1.16	1.62773	-1	-1	-1	-1	-1	0.782345	1.24608	-0.139753	-1	-1	-1	-1	-1	-1	-1	-1	-1	-1	-1	-1	-1	-1	-1	-1	-1	-1
ppa_stranded_DN12734_c0_g1_i1	1.86023	2.46937	5.0597	4.34244	1.82611	2.18643	3.02165	3.57186	3.19168	3.07475	1.733	0.182004	2.39586	3.01311	2.98155	3.22755	1.40882	2.05092	2.24666	2.64645	2.81371	0.443293	0.137772	2.9394	0.627463	1.4588	-0.684942	0.205281	-0.156495	0.8891	0.570768	2.76774	1.84298	0.947933	2.16977	0.313566	-0.0439988	-1
ppa_stranded_DN12763_c0_g1_i1	0.762942	-1	-1	-1	-1	0.809257	1.87256	-1	-0.0216135	-1	-1	-1	-1	0.716933	1.34335	-1	-1	-1	-1	0.947464	2.19059	-0.667017	-1	-1	-0.236812	-1	-1	-1	-1	-1	-1	-1	-1	-1	-1	-1	-1	-1
ppa_stranded_DN12777_c0_g1_i1	-1	-1	3.89335	-1	-1	1.37356	-1	-1	-1	0.817369	-1	-1	0.86688	-1	0.772913	3.2437	-0.283453	-1	1.7743	-0.0218633	-1	-0.161682	-1	-1	-1	-0.337708	-1	-1	-1	-1	-1	-1	-1	-1	-1	-1	-1	-1
ppa_stranded_DN12783_c0_g2_i1	-1	3.00655	-1	-1	-0.961479	-1	-1	-0.403869	-0.486641	-0.515038	-0.190528	-1	-1	-0.0933007	-0.0521169	-1	-1	-1	-1	-1	-0.11696	-0.697477	-1	-0.606459	-1	-1	-1	-1	0.0281517	-1	-1	-1	-1	-0.500221	-1	-1	-1	-1
ppa_stranded_DN12804_c0_g1_i1	3.82598	3.8628	4.21952	3.66764	4.5791	4.24538	4.93269	4.64422	5.07436	4.17044	4.58449	3.47604	4.64735	5.4845	5.54574	4.99497	5.29011	4.79412	3.74777	4.68802	4.64159	3.69459	4.3038	3.65938	2.76042	2.91215	2.89181	3.37671	3.37361	1.15546	1.62482	2.39627	3.01924	2.72059	0.927811	1.92896	2.78471	2.67037
ppa_stranded_DN12806_c0_g1_i1	1.38457	2.44312	1.99914	1.16339	1.31262	1.0145	1.92693	2.30688	1.06433	1.82209	1.30187	0.88689	1.10517	1.2347	-0.322362	1.43638	0.451354	2.4634	1.8435	0.507149	-0.198755	0.653987	1.67607	0.317985	-0.212713	0.234308	0.422519	-0.324167	0.492311	0.6782	0.690141	0.859284	-1	-0.277334	0.73691	-0.15097	-0.625087	-0.467614
ppa_stranded_DN12809_c0_g1_i1	5.02103	4.23767	4.89051	5.26176	6.02492	4.82215	4.81312	5.45053	5.1899	4.8425	3.81658	4.67659	4.35227	5.03736	4.07359	4.82223	4.47847	4.7009	4.58562	4.44928	4.83181	4.58642	4.6283	4.45847	5.17065	5.00203	4.25665	5.51179	4.88615	5.31201	5.30157	5.49714	5.91344	5.33026	5.23401	6.63065	6.64843	6.93703
ppa_stranded_DN1281_c0_g1_i1	2.25451	3.77068	-1	2.28132	1.96181	3.45069	3.49678	3.65372	3.52761	3.73167	2.69017	2.5869	3.38003	3.22907	3.41052	3.72734	3.42044	2.38288	2.80676	2.21992	3.79506	3.3267	3.11892	3.52879	3.45955	3.49364	4.09406	2.76309	4.15161	2.85298	3.06167	2.71068	2.98805	4.37146	2.38018	3.35973	2.72282	2.89327
ppa_stranded_DN12824_c0_g1_i1	1.42359	2.55698	2.60007	-1	-1	0.239814	1.07659	1.07632	1.91516	3.06759	-1	2.35021	0.70184	2.05982	1.18249	0.23651	-1	1.22867	0.447152	1.67299	0.248282	-0.170316	-1	0.364331	-1	-1	0.163295	1.73556	0.0452427	0.697444	-1	-1	-1	-1	-1	-1	-1	-1
ppa_stranded_DN12843_c0_g1_i1	-1	-1	-1	-1	-0.939624	-1	-1	-1	-1	-1	-1	-0.147962	0.94647	-1	-1	1.69419	-1	-1	-1	-1	-1	-1	-1	-1	-1	-1	-0.527995	-1	-1	-1	-1	-1	-1	-1	-1	-1	-0.70001	-1
ppa_stranded_DN12886_c0_g1_i1	3.40865	1.7544	3.208	1.54114	1.0764	0.336305	0.264972	1.15669	0.334886	1.77673	2.04193	2.18098	2.75629	1.29811	0.290018	1.93057	0.864189	1.32043	1.78669	1.26912	1.61644	2.01705	1.8672	0.80991	1.5516	1.15039	0.0959713	0.375396	-0.0266018	0.746878	1.18247	0.0775297	0.521114	0.297907	-0.27144	-1	-0.161677	-0.1842
ppa_stranded_DN12957_c0_g1_i1	7.47876	7.04474	6.06615	7.61654	7.77764	7.49751	7.68841	7.54317	8.4239	7.49243	7.41055	8.0065	7.30659	8.26966	6.37708	6.36577	6.45969	6.9951	6.17998	7.1945	6.84559	6.30857	7.50648	6.85686	5.75153	5.7514	6.7087	5.53907	7.70151	6.09845	6.85512	5.20797	6.19481	3.88409	3.7649	3.35648	4.5537	4.57324
ppa_stranded_DN12997_c0_g2_i1	2.80326	2.67407	-1	3.29738	2.22358	1.91998	3.07854	1.7683	1.80929	1.08028	1.0267	1.62589	3.14682	2.49202	3.01296	2.94831	2.87521	1.4163	1.63617	1.23119	2.98241	2.746	3.91695	3.23266	2.54466	1.15463	0.157569	0.962198	1.73881	2.60197	2.63463	4.60369	3.5993	3.70791	4.98205	3.03872	3.6244	2.875
ppa_stranded_DN13022_c0_g1_i1	-1	-1	-1	-1	-1	-1	-1	-1	-1	-1	-1	-1	-1	-1	-1	-1	-1	-1	-1	-1	-1	-1	-1	-1	-1	-1	-1	-1	-1	-1	-1	-1	1.54425	1.94207	1.91413	-1	1.09066	-1
ppa_stranded_DN13022_c1_g1_i1	-1	-1	-1	-1	-1	-1	-1	-1	-1	-1	-1	-1	-1	-1	-1	-1	-1	-1	-1	-1	-1	-1	-1	-1	-1	-1	-1	-1	-1	-1	-1	5.05565	4.09872	-1	-1	-1	2.26594	-1
ppa_stranded_DN13040_c0_g1_i1	2.9024	3.29025	-1	0.0645213	-1	0.528723	0.603221	1.74939	-0.00472368	1.88496	1.63149	0.800425	0.48359	-1	1.00058	0.0596641	1.0563	0.360224	0.630799	-0.213813	1.77579	-0.222556	0.409133	0.82963	-1	0.211064	-0.46388	-0.168121	0.798241	1.08285	-0.04576	-1	-0.51358	0.340876	-1	-0.135045	-0.487855	-0.0338072
ppa_stranded_DN13047_c0_g1_i1	3.76664	-1	-1	-1	-0.572189	-1	-1	2.04745	-1	-1	-1	-1	-1	-1	-1	-1	-1	-1	-1	-1	-1	-1	-1	-1	-1	-1	-1	-1	-1	-1	-1	-1	-1	-1	-1	-1	-1	-1
ppa_stranded_DN13080_c0_g2_i1	-1	-1	2.33459	2.26246	-1	0.805573	-1	1.32486	1.59831	1.32929	0.346351	2.2694	-1	0.0169588	0.842367	1.08659	2.17061	1.20737	2.62128	2.34697	-1	-0.371339	-1	-1	-1	-1	0.430936	-0.0281311	0.430381	0.120843	-1	-1	-1	-1	-1	-1	-1	-1
ppa_stranded_DN13087_c0_g1_i1	4.3428	6.30881	6.12513	5.67483	4.38355	4.42233	4.37523	5.32128	5.31721	5.1904	4.50687	5.05568	3.9795	4.72699	4.61487	5.5643	4.70853	3.7001	2.86004	3.16983	4.9617	2.94113	3.56692	4.33314	3.80981	3.06587	4.93053	3.86432	2.00676	3.35961	2.69196	3.10949	2.55068	3.02414	0.891676	-1	2.74653	1.58244
ppa_stranded_DN13264_c0_g2_i1	4.83468	5.81034	5.66536	5.56423	4.83141	4.05494	4.96555	4.88804	5.16185	5.36074	5.41881	4.79476	4.91218	5.39645	5.17193	5.64951	6.59146	5.73321	4.69183	4.92788	5.36017	4.82162	5.3901	5.5859	6.0946	5.67403	5.15979	5.9744	5.42896	6.26934	5.87327	6.72508	5.93207	5.43509	5.68909	6.63294	6.27853	6.62051
ppa_stranded_DN13338_c0_g1_i1	1.41454	-1	-1	-1	-1	-0.10626	-1	0.79879	2.46204	2.88218	-1	-0.19879	0.441602	0.681091	0.257291	-1	-1	2.14921	1.18646	0.248393	-0.673784	-0.741361	-0.0158873	-1	-0.389289	0.316837	2.15944	0.244442	-0.246096	-0.641861	-1	-0.612748	-0.368435	-1	-1	-1	-0.832698	-1
ppa_stranded_DN13341_c0_g2_i1	2.53041	3.60902	0.500576	2.09496	-0.654268	0.309353	1.29061	0.698938	-0.0502135	0.724032	2.54366	1.22565	1.96124	0.0326746	0.593566	2.04559	2.03997	1.70737	0.273524	1.48129	2.62273	1.35098	2.09546	0.40954	2.25091	1.5349	3.29803	4.8606	4.07459	5.12465	5.18816	5.85236	5.93071	6.05265	4.09975	5.14245	4.60252	3.11387
ppa_stranded_DN13490_c0_g1_i1	-1	-1	-1	-1	-1	-1	-1	-1	-1	-1	-1	-1	-1	1.76164	-1	-1	-1	-1	-1	-1	-1	-1	-1	-1	-1	-1	-1	-1	-1	3.54328	-1	-1	-1	4.88404	-1	-1	3.98449	-1
ppa_stranded_DN13491_c0_g1_i1	2.04593	1.77672	3.05704	2.81671	2.49372	2.84448	3.31429	3.47002	3.93006	2.69565	2.70222	2.96207	3.12618	2.78483	2.83784	2.79087	2.99123	2.86555	2.46897	3.29282	2.59844	2.03751	1.86556	1.75236	3.0968	2.2459	1.7632	1.86596	3.00918	1.04051	1.74921	-0.36752	1.45862	0.614279	1.26769	0.134834	0.74851	1.3514
ppa_stranded_DN13526_c0_g1_i1	-1	2.87566	-1	-1	1.5423	-1	-1	0.41086	2.54432	-1	-1	-1	-1	-1	-1	0.940827	-1	-1	-1	-1	1.18197	-1	-1	-1	-1	-1	-1	-1	-1	-1	0.184246	-1	-1	-1	-1	-1	-0.660141	-1
ppa_stranded_DN13533_c0_g1_i1	3.39032	3.87081	3.45691	4.95651	4.26222	4.40212	5.38389	5.1232	4.5476	4.28678	3.19214	3.2533	2.28123	4.07571	4.15569	5.08306	4.56014	4.82016	2.30336	2.7969	3.46938	3.37856	3.76025	3.98241	4.10013	4.12398	3.84502	3.28599	3.00626	2.26796	2.84854	3.40493	3.4342	3.19713	4.60758	1.84133	3.792	3.30425
ppa_stranded_DN13618_c0_g1_i1	-1	-1	-1	-1	-1	-1	-1	-1	-1	-1	-1	-1	0.346931	-1	-1	-1	-1	-1	-1	-0.101621	-1	-1	-1	-1	-1	-1	1.1498	1.50567	0.181011	1.06827	1.45009	1.27383	2.2085	2.5479	0.683937	0.148767	0.627591	-0.102823
ppa_stranded_DN13621_c0_g1_i1	-1	3.47219	-1	1.86904	-0.737634	2.1426	1.25853	2.14242	2.86017	2.41632	1.67319	2.53799	2.73104	3.26925	0.719356	2.22281	-1	2.32847	3.05924	0.949311	1.94241	2.09511	2.39369	1.26207	3.3122	2.64949	0.145155	2.3239	-1	0.539281	0.375328	-1	-1	-1	-1	-1	1.84285	0.195171
ppa_stranded_DN1369_c0_g1_i1	3.7993	5.9139	4.56158	4.61638	5.37276	4.05948	4.61381	4.8972	4.89515	4.33986	3.37855	4.29896	4.20994	5.529	5.11826	5.1256	4.45561	4.308	4.52386	4.5204	5.1625	4.88415	4.57016	4.69737	4.75205	3.81162	4.10463	5.71648	5.1258	5.29966	5.2085	5.87785	6.27896	6.65963	5.12081	5.02877	6.57335	6.22392
ppa_stranded_DN13706_c0_g1_i1	-1	-1	-1	-1	-1	-1	-1	-1	2.62937	-1	4.6792	-1	-1	-1	-1	-1	-1	-1	-1	-1	-1	-1	-1	-1	-1	-1	1.59575	-1	2.38681	-1	1.62029	-1	-1	-1	-1	-1	-1	-1
ppa_stranded_DN13707_c0_g2_i1	-1	-1	-1	-1	-0.962338	0.00183777	-1	-1	-1	-1	-1	-1	-1	-1	-1	-1	-1	-1	-1	-1	-1	-1	-1	-0.621059	-1	-1	-1	-1	0.880839	-1	-1	-1	-0.290075	-1	-1	-1	-1	-1
ppa_stranded_DN13768_c0_g2_i1	3.26464	3.15688	4.5637	3.37409	3.16212	3.45015	3.0025	3.43596	3.36336	3.42237	3.46243	2.47016	2.53519	1.66867	3.9984	3.1814	3.22344	2.81905	2.74064	2.48358	3.23004	3.21181	2.52801	2.68407	3.0193	2.75392	2.13484	3.84847	3.19439	3.53202	3.55022	3.53837	4.52011	4.23336	3.42869	3.00672	5.14095	5.18042
ppa_stranded_DN13778_c0_g2_i1	3.38088	3.60098	2.78485	6.96795	3.20369	2.51157	1.46509	2.34214	3.04763	1.72184	1.95306	2.56198	2.48199	2.86737	2.0303	3.05027	2.14269	1.58579	0.949258	3.20755	2.61416	2.39616	2.45036	1.48016	2.78309	1.77721	1.98796	2.17259	2.48642	1.92523	2.12729	2.07651	2.68964	3.21035	2.57404	2.08338	3.01737	3.12713
ppa_stranded_DN13795_c0_g2_i1	-1	-1	-1	-1	-0.0772479	-1	-0.529527	-1	0.588137	-1	0.934403	-0.614802	0.820561	-1	-1	-1	-1	-1	-1	-0.0712455	-1	-0.631591	-1	-1	-1	-1	-1	-1	-1	-1	-1	-1	-1	-1	-1	-1	-1	0.189704
ppa_stranded_DN13834_c0_g1_i1	1.47579	1.25035	-1	2.2453	1.19569	0.199682	0.73725	1.62599	2.58434	1.62602	2.40144	1.86703	1.06952	1.62346	0.404446	0.888938	0.774638	2.41988	1.72735	1.49806	1.18052	1.75272	1.45446	0.264483	1.29326	1.5257	1.04113	1.706	1.07122	0.965969	1.71297	0.992735	2.51694	2.57495	1.54782	1.57683	2.76144	2.15596
ppa_stranded_DN13875_c0_g1_i1	-1	-1	-1	-1	-1	5.88238	-1	3.12362	3.42393	3.05428	4.5782	3.311	-1	4.37335	-1	5.46031	4.81691	4.87703	7.00552	5.09996	4.15827	-1	6.918	7.57404	4.96608	5.6606	8.16184	-1	7.62137	7.68738	-1	8.20693	-1	-1	-1	-1	3.03166	-1
ppa_stranded_DN13896_c0_g1_i1	8.65319	9.29781	9.68955	9.2242	8.6899	8.71013	9.11355	8.85995	9.59222	9.83162	9.32692	9.38896	8.97099	9.8356	9.26099	8.77143	9.3677	9.09333	9.02526	9.19887	8.83727	8.76359	8.6024	9.21849	9.28205	9.32614	8.69552	9.21318	8.90616	8.84095	9.4061	8.73993	10.024	9.67019	10.4618	10.1336	9.80956	9.83497
ppa_stranded_DN13924_c0_g1_i1	4.85461	4.46978	5.71541	3.57521	5.18728	3.60189	4.34301	4.47405	4.92094	4.42411	5.17778	3.98727	3.95208	4.73444	4.5225	4.65002	3.94764	4.07082	4.46457	3.24965	4.4749	3.95226	3.94955	4.34389	4.70075	4.27617	4.62377	4.6084	4.4684	4.42065	4.1373	4.49164	4.86537	3.7708	3.78737	4.15895	5.02544	5.12831
ppa_stranded_DN14003_c0_g1_i1	-1	-1	-1	-1	-1	-1	-1	-1	-1	-0.499547	-1	-1	-1	-1	-1	-1	-1	0.447187	-1	-1	-1	-1	-0.160357	-1	-1	0.997269	-1	-1	-1	-1	-1	-1	-1	-1	-0.399537	0.0862193	-0.482836	-1
ppa_stranded_DN14056_c0_g1_i1	4.78284	3.30319	4.12229	4.10809	3.03679	3.62315	4.1945	3.90834	4.91722	3.99291	3.16605	4.05427	4.21887	4.58489	3.51902	3.90287	4.77613	4.3284	2.51363	3.27831	3.13103	3.90961	3.24447	3.4562	3.96488	3.4296	4.03794	4.07832	3.80945	3.49781	3.64854	3.69539	4.68119	3.12967	2.87566	3.69838	4.00335	4.05261
ppa_stranded_DN14206_c0_g1_i1	5.83736	4.92292	2.90891	4.81675	3.49129	1.9791	2.10314	1.98341	2.55785	4.52915	4.97465	6.10254	6.68786	4.67296	2.83171	4.06806	4.71621	1.86576	-1	4.78238	5.11498	5.21311	5.45635	3.8364	3.40709	2.04322	0.277074	0.951291	0.235884	4.92721	5.87706	3.68459	3.5744	2.49751	0.936746	4.27404	2.71228	2.04219
ppa_stranded_DN14237_c0_g2_i1	1.67962	2.79069	1.91801	0.110956	0.677391	0.795462	0.90856	0.469663	0.684004	0.961532	1.88232	1.20889	1.9847	1.881	0.910053	-0.164046	1.2502	1.44584	0.424815	1.21518	1.18228	0.318393	1.17226	0.951964	0.207069	-0.362494	0.284423	-0.473564	1.35283	0.582196	0.91064	0.0107942	1.2929	-0.593883	-1	-0.477005	-0.307066	-0.29363
ppa_stranded_DN14240_c0_g2_i1	3.77473	5.60659	5.53775	-1	1.62624	3.36233	2.48741	0.583013	5.71402	3.33716	5.79716	4.08351	4.72942	2.33232	2.1088	3.78138	3.89395	-1	4.20476	3.65298	3.20222	2.60384	4.01287	3.72558	2.8482	2.3438	0.160779	-1	3.46539	1.72425	0.652909	2.06387	3.32572	4.16579	2.69412	3.89263	3.16938	2.51389
ppa_stranded_DN14294_c0_g2_i1	3.79034	4.3443	3.84512	4.01735	4.01983	3.27602	3.71342	3.71964	4.02407	3.30848	3.05553	3.72759	3.46906	4.27608	3.51832	3.91468	4.08654	3.74451	3.38235	3.9737	3.8571	3.66139	3.40801	3.25088	3.49385	2.86836	3.15182	3.09086	3.38193	2.93496	3.09136	2.80736	3.6052	3.91908	3.5101	2.81694	3.70803	3.51328
ppa_stranded_DN143_c0_g1_i1	9.75012	10.2526	10.5845	13.0699	10.8518	9.86595	10.3041	10.4674	10.7427	11.18	10.9849	10.3155	10.5327	10.5781	10.3292	10.2709	10.7051	10.7968	10.3118	11.0035	10.4568	9.97855	9.94487	10.5058	11.0816	10.8446	10.3697	10.6163	9.95674	10.0478	10.1855	9.80271	10.6797	10.255	10.7548	10.9433	10.5742	10.8632
ppa_stranded_DN14327_c0_g1_i1	2.54633	4.69242	1.97651	-1	1.38469	0.0593688	2.01993	1.86049	1.70732	2.22125	-1	0.0270537	2.11654	2.21619	1.10813	0.289658	-1	0.511525	-0.562473	-1	2.82561	-0.0221713	-1	0.931173	-0.228829	-0.196064	0.715636	-1	-1	-1	1.49577	-1	-1	-1	2.09484	-1	-1	-1
ppa_stranded_DN14344_c0_g1_i1	6.94043	7.19972	7.70006	7.47603	6.96892	6.7501	7.25622	7.26874	7.55693	7.85363	7.67784	7.10344	7.00926	7.91701	7.73426	7.0064	7.6244	7.34785	7.395	7.22279	7.05783	6.76351	7.2652	7.202	7.36499	7.31819	6.9147	7.35955	7.19331	7.39413	7.23844	7.47895	7.40427	6.68159	8.24862	7.55409	7.6885	8.00842
ppa_stranded_DN14401_c0_g2_i1	10.7984	11.5096	12.2833	11.3424	12.8099	11.1218	11.646	11.7516	11.9619	12.1546	12.0495	11.4988	11.889	12.0897	11.5742	11.501	12.0491	11.7449	11.4806	12.1356	11.6735	11.1098	11.2745	11.7259	12.2256	12.1605	11.4579	11.7634	11.152	11.1258	11.3974	11.1362	11.9366	11.7684	12.3481	12.4972	11.8979	12.231
ppa_stranded_DN14481_c0_g2_i1	-1	-1	-1	-1	-1	-1	0.41931	-1	-1	-1	0.090268	-1	-1	1.82292	-0.158627	-1	-1	-1	4.54222	-1	-1	-1	-1	-1	-1	-1	-1	-1	-1	-1	-1	-1	-1	-1	-1	-1	-1	-1
ppa_stranded_DN14492_c0_g2_i1	2.24066	1.80756	5.28129	4.75496	0.96672	4.26392	2.07814	3.75158	1.94635	4.04755	-1	-0.564132	-1	1.7491	2.24389	4.18586	3.65599	2.98161	0.592166	-0.232377	2.62191	-0.488943	0.50733	2.50231	3.93376	2.16655	0.353238	1.27715	1.40116	-0.245138	-0.358511	2.25847	1.16258	1.02119	1.02268	0.869615	2.96383	1.0252
ppa_stranded_DN14532_c0_g1_i1	-0.153722	-1	-1	-1	-1	0.0478043	-1	-0.0115551	3.32208	4.13437	4.55155	-0.775621	4.46898	-1	5.23333	-1	-0.134084	-0.583611	4.00934	4.68458	1.28075	-0.802468	-1	-1	-1	-0.811722	-1	0.831517	2.28576	2.36901	-1	-1	-0.734733	-0.674418	-1	-1	-1	-1
ppa_stranded_DN1467_c0_g1_i1	0.183312	0.655539	1.84816	0.341811	0.333414	0.19808	0.526806	0.20326	0.945665	1.32239	0.356412	-0.346125	0.633838	0.289745	2.01094	0.930287	0.0982774	0.100894	-0.279865	-0.00277964	0.219505	-0.305197	-0.228701	0.467337	0.094813	-0.00108499	0.352493	0.00385941	-0.331546	-0.122272	-0.189525	-0.535593	0.00178866	-0.174242	-0.23865	-0.37083	0.0275246	-0.0931052
ppa_stranded_DN14693_c0_g2_i1	-1	-1	-1	-1	-1	0.375277	-1	-1	-1	-1	-1	-0.214107	-1	-1	-1	-1	-1	2.0255	-1	-1	-1	-0.585297	-1	-1	-1	-1	0.358067	-1	-0.0813002	-1	-1	-1	-1	-1	-1	-1	-1	-1
ppa_stranded_DN14711_c0_g1_i1	4.10943	4.09153	4.3495	4.02388	3.5698	2.68138	3.17947	3.44283	3.76574	5.5931	3.20596	3.36191	3.60187	4.15129	3.63789	4.31797	6.44415	3.85015	4.26659	3.59825	3.96782	3.55853	3.82237	4.37298	4.38524	4.12272	3.51725	4.33574	3.62949	4.06008	3.77023	4.47447	4.31955	4.06103	3.22644	5.44754	4.40025	4.47176
ppa_stranded_DN14736_c0_g1_i1	-1	3.17284	2.91288	-1	-1	1.01519	-1	-1	-1	-1	-1	1.77983	5.20578	2.05697	1.10147	-1	-1	-1	-1	-1	-1	-1	3.23154	-1	1.23094	-1	-1	-1	-1	-1	-1	-1	-1	-1	-1	-1	-0.723473	-1
ppa_stranded_DN14759_c0_g1_i1	5.311	6.94212	5.48397	7.83929	6.89049	6.18112	6.15779	7.09637	6.07397	7.30796	6.50199	6.68426	6.56227	6.24373	6.68719	5.6451	5.71944	4.84218	5.40066	5.06504	5.81381	4.81235	6.28238	4.65306	5.42851	5.99839	3.78894	4.4763	5.3858	5.87322	5.39497	4.98503	5.33688	10.2923	4.34047	6.10507	4.23409	4.40315
ppa_stranded_DN14763_c0_g2_i1	2.74705	2.57964	3.87124	4.40435	3.44989	2.67788	3.61392	3.83043	4.45643	3.32971	3.21773	3.03866	2.33729	3.61144	5.32301	3.89251	3.29002	3.82804	3.53812	3.48051	3.0637	3.03768	2.64002	3.13068	3.41186	3.11582	2.66666	3.2346	3.17064	2.88344	3.22699	2.64384	3.8224	3.40181	4.48647	3.93785	4.04767	3.92691
ppa_stranded_DN14789_c0_g1_i1	-1	-1	-1	-1	-1	-1	-1	-1	0.154517	-0.381634	-1	-0.18068	-1	0.115223	-0.447025	-1	-1	0.322743	-1	-1	-1	-0.517133	-0.140084	-1	-1	-0.410381	5.21132	4.20624	2.35438	4.55915	3.6864	6.44835	6.824	6.82536	5.73887	5.83444	5.30179	4.15259
ppa_stranded_DN14854_c0_g1_i1	4.12357	4.97763	5.96082	5.31062	5.79495	5.15031	5.88654	6.15101	6.47332	8.68233	5.52957	4.94143	4.72027	5.37032	5.10657	5.40025	5.05412	6.02483	5.46359	5.46623	5.17435	5.21896	5.12371	5.5763	5.90212	5.84592	5.58534	6.44892	5.84787	6.05324	5.96536	5.55504	6.04551	5.80899	6.47141	5.95307	6.54489	6.63637
ppa_stranded_DN14949_c0_g1_i1	-1	-1	-1	-1	-1	-1	0.239781	2.14834	2.25788	3.88246	1.70449	2.17211	-1	3.3806	5.29941	3.59271	4.4999	3.69475	-1	4.04678	3.80497	1.63205	2.33053	4.00799	3.6684	2.5401	3.82133	3.63004	2.6471	-1	2.33568	2.74555	-1	1.95717	-1	-1	1.33537	1.64432
ppa_stranded_DN14977_c0_g2_i1	3.22494	2.46704	3.71456	3.55053	1.67863	1.4534	2.55465	2.88512	2.18104	3.0841	3.69542	1.61063	2.57921	2.08935	2.47598	3.1893	1.85488	2.28025	2.79188	1.65259	3.30142	2.86825	1.71482	2.65395	2.03982	2.41838	3.33844	2.63841	1.97485	2.00293	2.33855	2.57463	3.37618	2.67128	2.30276	3.17468	3.05287	3.57954
ppa_stranded_DN15006_c0_g1_i1	0.489405	0.406609	-1	0.29514	0.676796	-0.219479	-0.14239	-0.0528824	0.354225	2.48956	2.0791	0.460409	0.789971	0.128675	0.670019	-0.0603983	-0.371218	0.753671	1.19216	1.27712	1.0335	-0.290381	-0.193676	0.382448	-0.108999	0.64436	-0.557311	-0.537295	-0.0732636	0.042382	0.268451	-0.39574	-0.343295	-0.192425	-0.00659899	0.0674477	-0.602677	-0.536443
ppa_stranded_DN15018_c0_g1_i1	4.40376	2.35664	4.0765	4.36913	3.09324	2.89406	3.62945	3.81045	3.45071	7.2988	3.46963	3.54087	3.08015	2.9125	3.79713	3.99058	4.6022	3.79828	3.94872	3.53653	3.21405	2.83021	3.2065	4.13061	4.46612	3.81932	3.23081	4.37973	3.66186	4.13763	3.36381	4.35272	3.92893	3.96605	3.5726	5.0438	4.79994	5.24814
ppa_stranded_DN15079_c0_g1_i1	4.07557	4.97411	2.10601	4.60688	4.69072	4.0061	3.32479	4.4607	4.78797	4.72567	3.42647	3.40617	3.72226	3.54691	5.59597	4.37145	4.48604	4.26746	4.93737	4.1787	4.81754	3.66411	3.99454	3.78983	4.94702	4.29153	3.0526	4.54842	4.02353	4.66669	4.69348	4.64064	5.27503	5.16621	4.74858	4.33811	5.19758	5.25519
ppa_stranded_DN15094_c0_g2_i1	10.6836	12.4825	9.43718	11.0941	9.0102	10.695	11.7976	10.1983	10.8232	12.4025	11.9853	10.9455	10.4303	11.2151	10.5444	11.0458	11.1856	11.8071	9.42851	11.3609	13.6739	10.8703	9.50425	11.177	12.1411	13.8005	9.83885	10.6854	12.3169	11.2802	11.5498	11.0517	10.269	10.2854	10.6638	12.0665	11.3625	16.1827
ppa_stranded_DN15126_c0_g1_i1	0.209441	1.29858	2.72339	1.21095	0.0729949	1.22519	1.69215	-0.102563	1.53949	0.447714	0.837576	1.30718	1.08729	2.62297	2.55989	1.56919	2.12804	1.80488	0.783311	2.23285	1.90278	1.00727	1.71224	1.20147	1.7816	1.59201	0.968307	0.547375	0.763663	0.592618	-0.0361962	0.63644	1.22609	0.153957	-0.00527296	0.400667	0.753197	0.675718
ppa_stranded_DN15177_c0_g1_i1	4.37337	4.69376	3.52631	5.2028	3.85862	3.45908	4.12245	4.80089	4.64002	6.58203	4.48225	4.2788	3.58038	4.62513	2.97604	2.41829	4.60838	3.54675	4.98326	3.76602	3.46199	3.97246	4.26804	4.05303	3.97579	3.88423	3.82754	3.85328	4.43131	4.46985	3.86501	3.67284	4.45777	4.19939	4.49409	5.13453	4.29387	4.4148
ppa_stranded_DN15190_c0_g1_i1	-1	3.83802	-1	0.600653	-0.912774	0.126084	-1	-0.695634	0.582989	-1	-1	0.438142	2.80117	1.80189	-1	0.132369	-1	0.839461	1.75961	-0.175382	0.914801	-1	0.202363	0.0384901	0.272829	-1	-1	-0.340373	-1	-1	-1	-1	-1	-1	-1	-1	-1	-1
ppa_stranded_DN15194_c0_g1_i1	3.83413	4.30534	4.086	5.01542	4.5465	4.20074	4.54997	5.38097	5.73728	4.73027	2.98093	3.27627	2.90446	4.27711	4.67057	5.13814	5.51852	5.2339	4.37656	4.72358	4.58679	4.04326	4.33061	4.29715	4.61788	4.36283	4.78673	4.61068	4.24521	3.12183	3.70132	4.56932	5.38416	5.32786	4.71193	5.47765	6.2396	6.09628
ppa_stranded_DN15200_c0_g1_i1	3.47699	-1	3.71082	2.20853	1.04832	-0.208198	2.03785	0.64618	2.53699	2.4941	2.33758	1.54882	2.94887	2.29353	2.16839	1.72124	1.48966	2.00788	0.560665	1.55505	0.224602	1.29423	1.07599	0.94431	-0.219416	-0.225616	-1	0.437945	1.30074	0.261851	0.481003	-1	0.383212	-1	-1	1.61891	1.17717	-1
ppa_stranded_DN15201_c0_g1_i1	0.880763	-0.741714	0.599635	0.742501	0.991002	0.180044	0.340694	0.834602	0.822348	1.67397	-1	-0.476422	0.682343	-0.252824	-0.693809	0.223764	0.25022	0.997653	0.563152	0.170897	0.987107	0.30271	-0.464794	-0.472015	-0.298245	-0.466744	0.382026	-0.229805	-0.597504	-0.460707	-0.149072	-0.7982	-0.161281	0.560605	-0.248253	-0.409912	0.197944	-0.00588469
ppa_stranded_DN15215_c0_g1_i1	3.25683	2.79977	3.23619	2.21793	2.58996	1.91714	2.72231	1.53836	0.504945	0.519951	1.63548	2.7603	2.16393	2.45414	4.65969	2.52797	1.40901	0.718555	1.37613	2.10302	2.23809	2.36004	1.7877	1.93609	1.76818	0.405622	0.321508	0.319242	0.483063	0.867534	0.933278	0.880966	2.31454	1.73942	0.476094	1.29454	1.03769	0.937825
ppa_stranded_DN15218_c0_g1_i1	4.78111	5.02596	5.67932	5.44215	3.13652	4.35193	4.67559	3.90891	4.64072	6.11525	5.578	4.74066	4.50007	4.49054	4.46548	5.63459	5.78753	5.28443	5.79588	5.31606	5.44202	4.97281	4.54755	4.67827	4.77879	5.00322	4.2597	5.25884	4.85223	4.3248	4.78915	4.75405	4.59802	4.93522	5.66116	4.39037	5.07765	5.43371
ppa_stranded_DN15223_c0_g1_i1	-1	-1	-1	1.22189	0.496646	-0.230727	-1	0.385379	-0.332387	1.10589	0.274432	-0.380323	1.36842	-1	1.3795	1.61387	0.0583452	0.34687	1.27307	0.737079	0.446264	-0.786295	0.0810007	-0.107571	-0.0561046	0.067886	-1	-1	-0.0322484	-0.637703	-0.525856	-1	-0.036015	-0.13842	-0.493616	-1	-0.619457	-0.0454486
ppa_stranded_DN15247_c0_g2_i1	3.19514	2.87712	2.91469	3.48442	4.08645	3.4887	3.62662	3.97253	3.9537	2.84443	2.61746	2.96759	2.13396	3.26942	4.9485	3.93979	3.37702	3.74519	4.23978	3.28925	3.28625	3.00027	3.42065	3.94253	4.60256	3.75211	2.97574	4.45	3.75814	4.08236	3.99667	4.83859	4.66768	4.47113	4.24105	4.36994	5.21276	5.42594
ppa_stranded_DN15284_c0_g1_i1	3.70023	5.03098	5.42208	3.93784	3.38269	2.85048	3.99042	2.99109	3.80959	3.18942	3.71347	3.43952	3.63694	3.17568	2.8445	4.2955	3.21615	2.48692	3.88781	3.59969	3.47675	2.83644	3.22489	3.23186	3.85196	3.98094	3.48355	4.30104	3.67138	4.74955	4.12831	4.13742	5.2544	4.63357	4.994	4.49278	5.65584	5.52391
ppa_stranded_DN15312_c0_g1_i1	5.82116	5.81095	7.08303	6.30941	5.84281	5.05017	5.08885	5.8875	5.97278	6.98236	5.01254	4.99848	5.35583	5.59909	6.15622	6.45339	6.78357	6.19527	6.19538	6.02431	5.97152	5.2935	5.87704	6.30981	6.67855	6.10368	5.43655	5.56205	5.33132	5.56845	5.64665	5.6221	5.7851	5.9568	5.80465	6.67444	6.0494	6.10162
ppa_stranded_DN15323_c0_g2_i1	2.98367	2.40171	-1	3.80996	2.5079	1.71751	1.52713	2.55065	2.69938	1.21713	1.8114	1.57711	1.66221	2.38388	3.10403	1.4386	1.75218	2.60953	0.926021	1.6776	1.14364	0.872413	1.90342	0.828275	0.232401	0.477055	0.719093	0.349423	1.51084	1.21782	1.57006	0.97689	1.16903	1.0695	0.194493	-0.440363	0.534466	-0.179921
ppa_stranded_DN15349_c0_g1_i1	0.881467	-1	-1	6.93423	-1	-1	-1	-1	-1	-1	-1	-1	-1	-1	-1	-1	0.234873	-1	-1	-1	-1	-1	-1	-1	-0.650682	-1	2.89736	1.07729	-0.429682	2.53747	1.71716	3.60086	3.45226	4.2385	2.23102	2.56297	2.34689	1.12364
ppa_stranded_DN15351_c0_g3_i1	2.36097	2.76421	-1	3.86288	1.90642	1.89061	2.44664	2.69514	2.67011	3.24457	3.04498	2.61269	1.80277	2.95697	4.16464	2.18043	2.0964	3.09415	1.44629	2.78108	2.07211	2.64847	2.23256	2.26357	1.91356	1.70473	1.37898	1.54083	2.27677	1.43685	1.86209	1.53822	1.35457	2.13319	4.63484	2.25862	1.7308	0.844257
ppa_stranded_DN15369_c0_g1_i1	-1	-1	-1	-1	-1	-1	-1	-1	-1	-1	-1	-1	-1	1.64439	-1	-1	-1	-1	-1	-1	-1	-1	-1	-1	-1	-1	-1	-1	-1	-1	-0.51062	-1	-1	-1	-1	-1	-1	-1
ppa_stranded_DN15371_c0_g1_i1	0.216849	-1	-1	-1	0.896518	-0.656148	0.316792	-0.293032	-0.212801	-0.502671	-0.172142	-0.188769	0.261181	0.83542	-0.0384959	0.404723	0.32	0.572897	-0.765463	-0.592871	-0.488415	0.102143	-0.0682348	0.600333	-0.459373	-0.0414548	0.391574	-0.122149	-0.201758	-0.0859936	-0.210396	-0.478379	0.230334	-1	-1	-1	-1	-0.230784
ppa_stranded_DN15377_c0_g1_i1	3.17605	3.16233	-1	-1	0.999291	1.14879	1.35677	2.33672	3.68102	2.17898	2.78604	0.458372	2.18514	2.87376	2.29136	3.29131	-0.197883	0.77416	-0.188847	1.35204	-1	-0.173132	1.13824	-0.572903	0.804176	-0.424565	3.29126	2.12592	1.40477	-0.13011	1.3335	-0.0562702	-1	-1	-1	-1	-0.133932	0.362374
ppa_stranded_DN15378_c0_g1_i2	7.7665	8.38913	8.18486	8.54278	5.57526	5.05497	4.05918	5.94543	6.58904	10.3385	7.50021	7.48841	7.25258	6.07857	4.53401	5.3636	4.28312	4.06693	6.74114	6.89873	5.9693	5.38941	5.45656	3.85171	4.87215	2.46854	2.53197	4.32711	4.99161	4.84942	5.03867	4.25094	4.10558	5.23363	5.05126	4.36624	3.63988	3.5726
ppa_stranded_DN15386_c0_g1_i1	-1	-1	-1	-1	-1	0.340747	-0.203038	2.8344	3.3658	4.02706	0.369709	0.471771	-1	0.224534	-1	-0.167708	-1	3.73607	-0.663409	-0.429558	1.1525	-0.374962	0.122298	-1	-0.401154	0.86061	2.52309	0.396245	-0.597455	-0.95451	-1	-1	-0.388586	-1	-1	-1	-0.794591	-1
ppa_stranded_DN15390_c0_g1_i1	1.99016	-1	-1	3.53458	5.40583	1.37055	1.94998	1.18161	2.47792	3.81384	2.60709	2.16988	2.48902	3.21195	0.616062	2.18844	1.2577	2.60807	4.44708	2.1066	2.21659	3.40191	2.24741	3.34536	3.95119	4.17936	3.36418	4.34596	4.12951	4.59686	4.60691	4.60511	5.21811	4.47875	4.52108	5.01306	5.51192	5.78868
ppa_stranded_DN15395_c0_g2_i1	3.24518	2.786	2.75208	3.59753	5.81975	2.43162	2.8755	2.8421	3.09889	3.36459	2.87723	2.70159	1.81585	2.5812	2.25165	3.43973	3.0129	2.25891	2.84112	2.61922	2.4472	2.43071	2.46801	2.94297	2.81565	2.32972	1.65735	2.63664	2.41172	2.39769	2.06607	2.20946	2.92759	3.11976	2.36282	3.32522	3.95497	4.17565
ppa_stranded_DN15396_c0_g1_i1	3.64681	3.80075	3.41806	3.55832	5.00524	3.05227	3.24527	3.68688	3.60846	3.71923	2.48525	3.79149	3.54845	4.08492	3.78084	2.78362	3.5019	2.49779	3.176	2.75913	2.77896	3.39077	2.78414	2.70775	2.69038	2.81953	2.08142	2.89689	2.95735	3.20958	2.58561	3.26569	3.98711	4.17251	2.11986	3.16863	4.5898	3.91976
ppa_stranded_DN154_c0_g1_i1	-1	-1	-1	-1	-0.805518	0.899602	0.988839	-0.355697	0.644861	-1	-1	0.317599	0.0149018	0.518513	-1	-1	0.00699668	0.112417	-1	0.542348	0.715061	0.371626	-0.558582	-0.0401331	-0.409985	0.0590942	-0.362877	-1	0.312537	-0.537272	-1	-1	0.0370999	-1	-1	-1	-1	-1
ppa_stranded_DN15404_c0_g1_i1	2.13838	2.87981	3.8059	2.11056	2.94977	1.78191	2.10857	2.90453	2.89567	2.45808	3.35145	2.53002	2.66523	2.30282	2.04293	3.40869	1.77388	2.2121	2.0569	2.45862	2.7019	2.24338	2.30698	2.52342	2.3318	1.49377	2.1228	2.60255	2.61096	2.84648	2.24195	2.57555	3.33466	3.58163	2.24971	2.81277	3.32279	3.39992
ppa_stranded_DN15405_c0_g1_i1	2.91131	4.57945	3.8976	3.04338	3.34782	2.69166	2.67585	2.51485	3.01264	1.17538	2.78431	2.82211	0.856152	4.28093	3.11033	3.12708	2.99672	2.02268	1.99675	2.95512	3.50089	0.918924	3.69878	3.494	1.51025	1.26942	1.07306	1.1991	1.48663	0.410776	0.626141	2.09011	2.32801	2.48886	1.04007	0.967957	2.03513	1.6295
ppa_stranded_DN15406_c1_g1_i1	7.12468	7.23134	8.00552	7.92811	7.17267	7.08831	7.40626	7.35372	7.5896	7.8631	7.56027	7.27394	7.5827	7.6995	7.19319	7.18533	8.52734	7.16286	7.04715	7.48786	7.3906	6.70041	7.07351	7.70801	7.56826	7.51455	6.98486	7.548	7.23533	6.85213	7.07848	6.87597	7.35672	7.16612	7.27217	8.03998	7.85603	7.91652
ppa_stranded_DN15428_c0_g1_i1	3.96653	3.29407	7.56608	5.72341	4.87126	4.54886	4.89687	4.06343	3.37837	4.10519	4.66221	6.55418	5.9977	5.77361	4.63787	4.01793	3.90789	3.56436	4.09176	3.59878	5.38728	5.03611	6.62676	6.7296	5.58953	5.63842	5.94788	8.40302	7.52953	9.37372	9.08234	7.5591	7.78713	8.29196	7.76486	6.61081	6.30235	6.5607
ppa_stranded_DN15470_c0_g2_i1	3.36018	3.8304	4.11856	5.25886	6.14636	3.26081	2.17186	3.02015	4.06651	4.78235	4.35531	3.56384	3.98447	3.27597	3.10593	2.86739	2.08079	2.53479	3.17666	3.8798	3.30203	4.06713	2.47887	2.73035	2.05848	2.97366	1.81928	3.58218	2.90021	3.67553	4.33322	2.232	3.20268	4.25024	3.93277	3.62738	3.22763	2.80286
ppa_stranded_DN15506_c0_g1_i1	7.34788	7.04939	6.61499	6.6665	5.64158	5.29144	6.80068	6.60074	7.11631	6.60434	5.10952	6.32951	5.7801	4.19516	3.98839	5.06798	4.91263	5.08648	4.83191	3.50513	5.65292	3.69184	2.45241	4.66134	4.19939	3.20889	5.13619	4.3839	2.80034	2.50781	4.48335	1.7009	3.53122	-1	3.78933	-1	1.13492	2.13831
ppa_stranded_DN15512_c0_g2_i1	4.09618	4.60841	4.18375	4.84372	5.27078	3.64139	3.73756	3.99372	3.87653	3.4176	3.72127	4.26876	4.2745	4.60403	3.84627	3.81997	3.54127	3.65663	2.25586	3.78374	3.38969	3.54518	3.95189	3.83959	3.88818	3.46722	3.81281	3.74623	3.81647	3.85474	3.5661	3.09614	3.72403	3.29544	3.52087	3.81038	3.70766	4.04446
ppa_stranded_DN15514_c0_g2_i1	1.43331	3.76233	-1	-1	0.039348	-0.129562	-0.454516	1.23439	0.870384	1.0964	0.432257	0.136797	-1	1.5597	0.402865	0.784211	0.551946	-0.473865	1.53037	1.21035	-0.597743	-0.497934	-0.545821	0.943309	-1	-1	-1	-0.00511846	0.424909	-1	-1	-0.348694	0.0197651	-1	-1	-1	-0.397387	-0.0556247
ppa_stranded_DN15536_c0_g2_i1	1.02633	2.36522	-1	0.376219	-0.834002	0.452	0.751359	1.47375	1.16906	0.960138	0.3541	0.748317	-1	0.877664	0.02819	0.941698	0.758807	0.5471	2.43455	0.584199	1.00203	0.973547	0.829663	-0.510152	0.829436	0.965716	0.946637	1.47561	0.594175	-0.545119	-0.122234	0.369015	1.3882	0.712524	2.03165	0.5828	2.46366	1.70395
ppa_stranded_DN15547_c0_g1_i1	-1	-1	-1	-1	-1	-1	-1	-1	4.54267	-1	-1	3.26767	7.33585	-1	2.36441	4.31275	2.64324	5.15362	4.42563	4.07101	5.28047	3.40244	5.00195	5.37136	5.68116	5.30495	6.41618	9.87827	9.94398	10.5364	10.6962	11.496	12.0384	10.2599	10.4795	14.0953	11.0803	9.83411
ppa_stranded_DN15548_c0_g1_i1	-1	-1	-1	-1	-1	-1	-1	-1	-1	-1	-1	-1	-1	-1	-1	-1	-1	-1	-1	-1	-1	-1	-1	-1	-1	-1	-1	1.47296	1.93339	0.0285776	1.43959	-1	-1	-1	-1	-1	-1	-1
ppa_stranded_DN15552_c0_g1_i1	1.80737	2.23238	4.66628	3.22368	3.0961	2.40778	2.67673	3.06763	3.05277	4.77378	2.12752	2.43487	2.46229	3.42698	3.06599	3.31423	3.9803	3.60161	3.69009	2.86289	3.04218	3.2808	2.74911	3.30062	3.76004	3.38491	2.99489	3.22103	3.24397	2.50209	3.04055	3.07581	3.17285	3.50787	3.11886	3.78708	3.62685	3.84584
ppa_stranded_DN15579_c0_g1_i1	2.67297	3.23012	3.58287	6.17129	3.73337	2.95681	4.27865	3.92991	4.58716	3.45743	3.57392	3.72531	3.37042	3.99142	4.15668	4.33911	4.34792	3.98152	4.00185	3.75497	4.00227	4.19128	3.67646	4.14585	4.36499	4.29537	3.70063	4.72609	4.69484	5.26609	4.63743	5.0929	4.59362	4.70081	4.21821	5.55956	5.24064	5.55117
ppa_stranded_DN15584_c0_g2_i1	4.55621	-1	-1	-1	2.07085	0.667036	1.30862	3.68434	1.12317	2.7346	-1	1.312	2.18601	-1	2.44633	0.814225	-1	0.48411	0.251006	-1	2.82039	-1	-1	1.73178	-1	-1	-1	-0.35196	0.700643	0.26316	-1	-1	-1	0.134595	-1	-1	-0.617521	-0.0479037
ppa_stranded_DN15596_c1_g1_i1	0.929488	-1	3.70401	-1	0.984557	0.157812	-1	1.47703	2.07721	-1	-1	-0.370414	0.302169	-1	-1	-1	-1	-1	-1	-1	-1	-1	-1	-1	-1	-1	-1	-1	-1	-1	-1	-1	-0.215163	-1	-1	-1	-0.50855	-1
ppa_stranded_DN15601_c0_g1_i1	9.08341	9.29808	9.08357	10.3498	9.49351	8.28711	8.42555	9.79573	9.46359	10.554	8.49512	9.92309	9.09791	9.09538	7.93549	8.76222	7.74295	7.6812	7.92354	7.62489	8.69768	7.86514	9.14503	8.7223	8.76411	7.55637	7.39659	7.98146	7.626	8.44358	8.46373	8.57129	8.33378	8.53038	8.63531	7.82153	8.53489	8.19186
ppa_stranded_DN15603_c0_g1_i1	2.692	3.5611	2.72346	3.44636	2.93939	2.84088	2.44199	3.83165	3.70653	3.41239	3.46291	3.04363	2.97598	3.63959	3.85498	3.22281	3.45731	3.10649	3.80029	3.11022	3.01563	2.91674	2.40141	2.08612	2.42122	2.12402	1.8524	3.39068	3.14395	3.22622	2.5197	1.97907	3.46193	3.29289	2.51792	2.99514	3.99294	3.90895
ppa_stranded_DN15609_c0_g2_i1	-1	-1	-1	-1	-1	-0.443003	-1	4.6702	2.27809	6.49411	-1	0.910333	-1	0.78823	-1	-0.710968	-0.73014	6.58233	-1	-0.545509	-0.772914	-0.575468	-0.288249	0.638264	-0.643388	2.17814	0.359369	-0.232806	-0.309115	-0.0322735	-0.112633	-0.235937	-1	-1	-1	-1	-0.188371	-1
ppa_stranded_DN15615_c0_g1_i1	4.05925	3.55046	4.69537	0.677315	3.1596	2.42617	2.44956	3.0442	3.97668	3.52762	3.43533	2.1117	3.06041	2.30129	1.95773	3.08093	2.61426	1.91927	2.28044	1.55106	1.8668	1.42608	0.763878	1.93178	-0.162504	0.511004	-0.467608	0.855613	0.708655	0.620921	0.626102	0.334341	0.884245	2.01885	0.722789	-1	1.22541	0.356057
ppa_stranded_DN15650_c0_g1_i1	2.20263	3.99059	-1	0.189934	1.76666	-0.0275808	0.924398	0.870609	-0.442104	-1	-1	0.243668	-0.246715	3.50017	2.70553	1.99425	1.40839	0.532391	-1	-1	1.1429	0.666126	1.89048	2.80291	1.20783	0.971577	-0.389309	0.985846	-1	-0.916169	-0.50808	0.482445	1.07854	2.54929	2.06608	0.549673	1.9191	0.540541
ppa_stranded_DN15651_c0_g1_i2	1.05482	2.52455	-1	-1	1.49288	-1	1.11031	2.54801	-1	0.262733	0.207207	0.998465	-1	0.331531	-0.317717	0.532982	-1	0.545744	-1	0.369669	0.851425	2.03833	-1	1.05226	1.42826	1.02587	3.48298	-0.551186	0.710045	3.09104	4.27911	4.05809	3.87172	4.6964	4.34815	6.063	4.7188	5.05768
ppa_stranded_DN15653_c0_g1_i1	-1	4.55664	-1	3.12188	-1	1.57136	2.34247	3.31217	-1	3.51225	-1	2.91329	-1	-1	3.29055	5.3706	5.51125	3.8256	-1	2.92533	-1	0.525931	-1	-1	1.60379	3.91297	-1	1.93474	1.66154	4.06672	3.73273	3.04823	3.32506	4.54356	3.48595	-1	1.86645	-1
ppa_stranded_DN15653_c0_g2_i1	-1	-1	-1	-1	-1	-1	-1	1.10227	-1	1.67721	-1	-1	2.15713	-1	-1	4.77613	3.37651	3.01144	-1	-1	-1	-1	-1	-1	1.75883	1.87853	-1	-1	-1	-1	-1	-1	-1	-1	-1	-1	-0.36614	-1
ppa_stranded_DN15655_c0_g1_i1	-1	-1	-1	-1	-1	-1	-0.0584838	-1	-1	-1	-1	-1	-1	-1	1.12623	-1	-1	0.386208	0.570558	-0.0631728	-1	-0.25365	-1	-1	-1	-1	-1	-1	-1	-1	-0.642972	-1	-1	-1	-1	-1	-1	-1
ppa_stranded_DN15666_c0_g1_i1	4.60443	6.10443	5.90458	6.18698	5.57678	4.15113	4.76827	4.97126	4.13235	4.85079	4.25547	3.93082	4.37122	4.67782	3.76651	5.4056	4.72016	5.0864	3.24947	4.02999	4.5713	4.66431	4.39813	5.15128	5.12041	4.9871	4.42553	4.76771	3.98373	4.79124	4.24849	3.90934	4.69443	5.11886	4.71258	4.99186	5.09218	5.18246
ppa_stranded_DN15670_c0_g2_i1	3.83197	3.38755	3.72388	4.26018	3.30938	2.46705	2.50272	3.22118	3.33169	2.37925	2.96592	2.4995	2.67922	3.82628	1.99831	2.85483	2.10572	1.85652	1.77627	2.65361	2.18215	2.52251	3.34637	3.77422	3.63052	2.99528	3.32311	2.6826	3.45871	3.79879	3.44329	3.58406	4.14265	5.06878	4.12532	4.39598	3.90319	4.27588
ppa_stranded_DN15672_c0_g1_i1	-1	-1	-1	-1	2.18644	-1	3.76908	5.84122	4.34709	5.95793	-1	-1	-1	0.433688	2.44052	2.10311	1.84761	5.89907	2.77601	0.426503	0.596131	1.20976	0.481537	0.752121	1.95363	4.02407	3.80707	0.637962	-0.36067	-1	0.871938	0.416843	0.356559	-0.103759	-1	-1	0.129251	-0.53714
ppa_stranded_DN15688_c0_g1_i1	2.27944	-1	1.45305	-1	1.83232	-1	-1	-0.184432	-1	-1	-1	-1	-1	0.516093	-1	-0.072086	-1	-0.340259	-0.176561	1.5749	1.69381	-1	0.202363	-1	-0.227545	-0.000326165	-1	-1	-0.606194	-1	0.0474408	-1	-0.194539	-1	-1	-1	-0.187916	-0.487174
ppa_stranded_DN15703_c0_g1_i1	2.52553	2.85382	3.84195	-0.167032	0.778626	1.34419	0.703764	0.953885	2.00003	-1	1.73976	1.53692	1.45122	2.44646	2.22197	0.827487	1.8925	0.420268	-0.31889	0.682979	1.0662	1.8326	1.21772	0.589119	-0.248407	0.0578499	1.02648	0.432993	-0.689671	-0.947895	-0.577686	-1	0.0867027	0.66692	-0.382114	-0.332445	-0.456161	-0.130701
ppa_stranded_DN15707_c0_g1_i1	3.9898	5.09939	4.38733	3.94642	5.54781	3.19228	4.0313	4.19012	3.73755	3.09333	3.6187	3.52663	3.22832	3.99955	3.66013	4.33153	5.2105	3.55485	3.47239	4.03521	4.36188	3.54025	3.59113	4.05681	4.24618	4.0296	3.64004	4.11846	3.61556	4.14799	3.76819	4.60864	4.66396	3.69191	4.19208	3.85021	4.92889	5.11992
ppa_stranded_DN15715_c0_g2_i1	4.06163	4.19865	5.02278	-1	4.67684	2.85597	1.81887	-1	2.73113	-1	3.09889	-1	0.659803	1.04163	1.48176	-1	-1	2.15931	1.12367	2.00106	1.31197	-1	-1	-1	-1	-1	-1	-1	-1	-1	-1	-1	2.45793	1.5086	-1	-1	-0.660942	1.40256
ppa_stranded_DN15720_c0_g1_i1	2.27584	1.66479	3.35587	3.76315	2.98742	2.22655	2.51202	2.6967	2.25893	2.9227	1.80134	1.87435	2.78099	3.54573	1.82111	2.68407	0.562827	2.72601	3.3281	1.68488	2.28662	2.83875	2.66841	2.65738	2.89471	2.10931	2.57405	3.11589	2.32476	3.17771	2.49192	3.09829	3.12998	2.19035	3.71348	3.68592	4.02905	4.4676
ppa_stranded_DN15731_c0_g1_i2	8.43389	10.2137	10.2458	9.97583	9.07533	8.21747	8.64447	8.57852	8.68784	9.45073	8.84555	8.44492	8.10883	9.42445	8.58657	10.1808	9.6884	8.56865	9.86847	9.18832	9.31956	8.47025	8.70494	9.4455	9.40938	8.80542	8.46419	8.62679	7.9046	7.73143	7.80409	8.37292	9.49545	9.4409	9.02919	9.75244	9.0294	8.96802
ppa_stranded_DN15732_c0_g1_i3	4.95962	5.34213	5.80134	6.58958	4.58105	4.04139	4.61333	5.10137	4.92709	3.92199	4.38632	4.88914	4.35398	5.26147	4.67431	4.88899	4.56014	4.76777	4.52496	4.39028	4.78006	4.41042	4.57358	4.92227	4.82521	4.28641	4.42047	4.83477	4.65988	4.11238	4.39363	4.01596	5.20516	4.78773	4.42549	4.24617	5.29801	5.52302
ppa_stranded_DN15739_c0_g1_i1	0.297349	0.180651	-1	2.19938	1.28658	1.06393	-0.26775	1.78814	3.18129	3.20859	3.14219	1.21938	1.84768	0.196313	1.29751	1.22298	1.47545	1.8513	2.79337	2.94459	1.00039	1.00268	0.170268	1.51971	1.21118	1.27345	0.866317	1.51344	1.94661	1.42761	1.5597	0.426311	1.75161	2.22277	1.18979	1.59545	2.37937	1.73337
ppa_stranded_DN15748_c0_g1_i1	-1	-1	-1	-1	-1	-1	-1	-1	-1	-1	-1	-1	-1	-1	-1	-1	-1	-1	-1	-1	-1	-1	-1	-1	-1	-1	-1	6.28761	4.14622	6.65683	5.63035	8.3744	6.78749	6.35393	4.21459	7.07686	5.13473	2.94215
ppa_stranded_DN15756_c0_g1_i1	3.678	3.00944	6.05867	5.10962	2.13854	4.0719	3.85148	3.80024	3.56524	3.19051	2.78824	3.10743	3.01531	2.98194	3.89251	3.44157	2.12059	3.30587	5.67256	2.98781	4.08933	2.91683	3.29955	4.13467	4.15715	4.01626	3.62099	3.46859	2.83213	3.36487	4.14816	3.47021	4.00411	5.3022	5.15867	4.80277	4.4226	5.18091
ppa_stranded_DN15761_c0_g1_i1	5.48213	1.72948	-1	2.44195	-0.785541	1.46034	1.63152	4.61832	7.49305	5.38779	5.28823	5.13135	5.02529	3.4543	0.0950567	1.81468	3.61202	4.46571	5.19965	3.88432	3.07008	3.61482	2.4459	3.41479	1.10646	2.77625	7.35574	6.6038	4.94157	2.94194	2.83809	1.7133	2.5853	3.76968	-1	-1	1.49214	2.27185
ppa_stranded_DN15763_c0_g1_i1	-1	3.08991	-1	-1	-1	1.90841	1.72702	0.429303	1.85521	0.968697	-1	-1	1.48441	1.07154	0.587875	-1	0.122287	2.17576	-1	0.184402	1.16631	-0.509217	-1	-1	0.691773	1.36209	-1	0.288818	0.665358	-1	-1	-1	0.112788	-1	0.0813005	-1	1.69098	0.139508
ppa_stranded_DN15776_c0_g1_i1	1.81821	-1	3.36853	2.76176	1.53899	1.96949	2.26867	2.30934	1.67377	1.74168	3.32801	1.91119	1.72142	2.31802	1.13677	2.53858	2.6632	1.54924	0.763691	1.28696	1.3029	2.20707	2.17459	0.776171	1.21802	0.837581	0.86444	1.10827	1.29102	0.29772	2.03441	1.98056	2.61468	2.20831	-1	1.18304	3.00996	2.4284
ppa_stranded_DN15789_c0_g1_i1	-1	-1	3.4011	3.10866	2.7595	2.07072	1.41081	-1	1.534	1.92194	4.83662	1.59962	-1	1.30868	1.28904	0.46692	-1	0.459127	-0.196297	1.55353	-1	0.0248049	-1	-1	-1	-1	-1	-1	-1	-1	-1	-1	-1	0.955913	-1	-1	-0.774502	-1
ppa_stranded_DN15791_c0_g3_i1	2.38188	2.93854	3.88903	2.62306	2.40261	2.33357	2.37205	2.18619	2.18906	2.33405	3.68958	2.39498	1.57566	2.77386	3.20978	3.45388	2.89731	2.61727	1.66606	2.36272	2.73328	1.9108	1.97803	2.42907	3.05313	3.00448	2.07698	2.82204	2.33669	3.13168	2.99159	2.78219	2.78835	3.12209	2.1267	2.98339	3.75777	3.65866
ppa_stranded_DN15795_c0_g1_i1	3.85204	3.80479	2.94221	4.56268	4.41204	2.95562	3.94516	4.25666	4.37859	2.90315	3.30523	3.06006	3.57466	4.0792	3.4983	3.76591	3.69261	3.28214	3.84287	3.228	3.03081	3.59988	3.4276	3.78852	3.7018	3.3867	3.7801	3.74348	3.86571	3.99496	3.69021	3.8702	4.62797	4.94586	4.2382	3.45517	5.22556	4.95066
ppa_stranded_DN15807_c0_g2_i2	4.67094	6.18303	7.33806	5.2008	5.95285	4.50797	5.17463	4.75948	4.91657	5.47079	5.88497	4.70116	5.15152	6.00811	5.84223	6.68895	7.15906	5.84141	5.9386	6.00297	6.18951	5.24633	5.3876	5.92518	6.10346	5.70127	5.17664	5.79251	5.12819	5.33055	5.26253	5.79414	5.67938	5.23415	4.43137	5.07141	5.75766	5.85455
ppa_stranded_DN15811_c0_g1_i1	3.1768	2.42928	3.25174	4.81566	3.02954	2.94975	2.96052	3.31283	3.7155	2.64967	3.35586	2.71857	2.15534	2.67309	1.08102	3.65921	3.3251	3.0862	1.36367	2.4109	2.60214	1.9072	3.23271	2.06875	1.23505	1.68015	2.72885	1.27346	1.54126	1.37415	1.54429	1.1884	-1	3.02582	0.983376	0.427196	0.377509	-0.268794
ppa_stranded_DN15817_c0_g1_i2	3.90406	5.99046	5.79131	5.44236	5.39223	4.68151	4.93329	4.51546	5.44106	9.50105	4.17508	4.48869	4.83103	5.15122	5.76461	5.00125	5.57392	5.38242	5.78778	4.54421	5.11339	4.54376	4.66097	5.15117	5.63815	5.58628	5.03998	5.53683	5.16833	4.89416	5.46226	5.18735	5.62931	4.97694	5.08383	6.47437	5.79044	5.9906
ppa_stranded_DN15819_c0_g1_i2	1.23029	1.81315	2.15142	1.38436	0.757013	1.0132	-0.458067	1.49352	0.33223	1.42552	2.17547	0.239751	0.886658	1.0625	0.978304	1.30417	1.21609	1.42172	0.561457	0.427053	0.83161	0.521542	0.690354	0.271418	0.735775	0.966257	0.172348	0.538048	-0.109149	1.11854	-0.407673	1.62106	1.31576	1.96305	2.1655	2.34053	1.27779	1.53875
ppa_stranded_DN15829_c0_g2_i1	2.16703	5.7625	3.64067	2.65814	2.90976	1.02254	1.66629	3.78677	3.21429	1.71137	2.84928	2.45305	3.26259	2.21083	2.07439	2.74263	2.94647	-1	3.05205	2.23947	1.91952	2.31244	2.55679	2.62723	3.17091	2.23876	2.19033	2.65675	2.31621	2.00234	2.06726	1.69083	3.41676	2.9912	3.84574	3.77904	4.28477	4.58304
ppa_stranded_DN1584_c0_g1_i1	-1	-1	7.17445	-1	0.319397	-1	8.29982	7.33714	7.11605	-1	8.84782	-1	11.5274	1.57176	4.94296	7.1096	-1	6.66008	-1	3.8408	-1	4.988	4.59664	5.80991	4.94356	2.91424	-1	3.83543	3.72719	-1	-1	-1	-1	4.86569	-1	-1	5.38728	-1
ppa_stranded_DN15863_c0_g1_i2	2.51762	4.02723	2.17674	4.91539	5.14275	2.7312	2.88887	3.00956	4.10375	3.82011	1.66329	3.00904	3.14857	3.35762	1.87322	2.63798	3.28439	2.37356	3.44319	1.93746	2.21	2.37364	2.15646	2.29248	2.13206	1.06448	2.00347	2.80344	1.55036	2.61362	1.72933	2.39386	2.32125	2.76838	-0.178769	1.5726	1.33354	1.32162
ppa_stranded_DN15864_c0_g2_i1	2.92637	4.19304	-1	3.59601	3.49304	2.86928	3.76406	4.07784	4.38604	4.64968	2.72382	3.81378	3.27448	4.23682	2.82503	4.37951	3.52122	3.24604	3.44534	3.11835	3.99785	3.39233	3.73376	3.16224	3.47715	3.79149	3.40602	4.19725	3.96578	4.19908	4.05823	3.90919	4.90173	4.79664	4.28829	4.08938	5.08388	5.1275
ppa_stranded_DN15873_c0_g2_i1	3.96746	3.69982	3.93861	4.31897	3.78001	3.70751	4.45419	4.36142	4.08179	4.45277	4.01149	3.2155	3.39248	3.28347	3.85423	3.24175	3.72009	3.81428	3.63201	3.30213	3.89839	2.51145	2.80915	2.94316	3.3039	3.20723	3.53818	3.08473	3.38325	2.55238	2.37793	2.87963	3.9078	3.9754	4.55374	3.31066	4.57876	5.01663
ppa_stranded_DN15877_c0_g1_i1	3.46929	2.95435	3.61864	-1	5.80873	2.76294	3.87747	3.8851	4.26473	2.87619	2.57534	3.65968	4.06612	3.64058	4.49151	3.7577	2.51702	3.14443	2.48828	3.30246	2.99048	3.52362	1.92631	2.97425	3.25637	2.40041	3.15977	3.78827	3.70393	4.01997	3.97711	3.07709	4.91029	5.15964	4.15383	3.3846	5.68024	5.67578
ppa_stranded_DN15884_c0_g1_i1	6.78214	6.78373	5.13055	8.6782	6.66762	6.67008	6.67425	8.37798	7.82177	7.92853	7.81108	7.93167	6.5643	6.54208	8.14049	7.74733	6.83604	7.2779	8.03662	7.36574	8.58374	6.42901	7.04217	7.50364	6.62303	6.2064	7.18971	7.12691	6.45642	5.63232	6.44087	4.04749	5.6936	3.56224	4.73747	3.8454	4.18639	4.937
ppa_stranded_DN15886_c0_g1_i1	3.92589	3.97499	5.34993	6.3696	4.71744	4.84249	5.39497	5.27568	5.60061	5.06885	5.33909	4.92	4.37178	5.26975	5.7174	5.54698	5.60073	5.80984	5.73157	5.25605	5.26876	4.95787	4.54319	4.85884	5.40416	5.26851	4.87483	5.26463	4.8629	4.6265	4.73127	4.14406	5.35041	4.49775	4.43731	5.4073	5.4104	5.40855
ppa_stranded_DN15887_c0_g1_i1	-1	-1	-1	-1	-1	-1	-1	-1	0.603177	-1	0.930408	-0.161595	-1	-1	-1	-1	-1	-1	-1	-1	1.14309	0.820782	-0.00650171	1.3386	0.899476	0.386534	-1	0.658781	-1	0.01759	0.364005	1.17522	0.955363	1.70254	-1	2.28522	-0.0185497	0.102197
ppa_stranded_DN15927_c0_g2_i1	1.4627	-1	-1	4.02846	3.02702	0.969073	1.96497	3.27895	2.22457	2.35332	3.15409	1.12051	2.80925	-1	-1	-1	-1	3.37865	-1	-1	-1	-1	-1	-0.266915	2.00924	1.01273	0.74496	0.0650081	0.985456	-1	-1	-0.0913202	1.42133	1.26697	1.73483	0.983569	1.89451	1.63638
ppa_stranded_DN15947_c0_g1_i1	1.9024	1.58528	0.975538	1.29847	1.22874	0.501406	0.659434	0.418586	1.1637	-0.0885728	2.08057	0.668027	0.723344	-0.714577	0.232309	1.37716	-1	-0.051042	0.0994465	0.559926	1.15441	0.06887	-1	-0.192157	0.372937	-0.161945	0.388834	0.718852	-0.398352	-0.454315	0.610773	-1	-1	-1	-1	-1	-0.454846	-1
ppa_stranded_DN15990_c0_g2_i1	6.82663	6.20327	6.29995	7.37304	5.5527	5.76226	6.65734	6.12228	7.16432	7.13986	6.81368	7.16391	6.74412	5.88321	6.18906	5.9794	5.736	5.84425	5.65871	5.88153	5.18435	5.27964	5.26733	5.06918	5.15122	5.19165	4.8999	4.90674	5.95673	4.94095	4.95374	3.87038	4.10085	4.99421	3.68113	3.50728	3.83208	3.95186
ppa_stranded_DN15993_c0_g2_i1	2.34859	-1	1.138	2.45778	3.27726	3.81805	2.93957	1.70837	1.61723	0.101511	0.498515	0.0834823	1.79496	0.239793	2.27471	1.87552	4.9868	1.21443	0.548076	1.63288	0.193965	-0.0754655	0.565122	1.06507	1.27397	0.545182	-0.257018	0.454487	1.96141	-0.177626	0.227157	-0.482313	0.00591142	0.443588	-0.301936	0.243059	-0.250531	0.256317
ppa_stranded_DN15999_c0_g1_i2	2.97909	2.30508	3.67967	1.0708	1.68182	2.60516	0.949065	1.26915	1.61764	1.68297	1.70604	1.01958	1.74514	0.665571	1.89185	2.29805	1.82739	1.1586	0.512713	0.977876	1.9366	1.44455	0.70829	1.51705	1.02606	0.168184	0.0456399	-0.0335453	-0.0921701	0.465483	-0.178223	0.0766843	0.679124	0.298111	-1	-1	0.477428	0.0264354
ppa_stranded_DN16002_c0_g1_i1	-1	-1	-1	-1	-1	2.31772	-1	-1	-1	-1	-1	-1	-1	-1	-1	-1	1.55001	2.65566	-1	-1	-1	-1	-1	-1	-1	-1	-1	-1	-1	-1	-1	-1	-1	-1	-1	-1	-1	-1
ppa_stranded_DN16006_c0_g1_i2	4.29164	5.3604	5.63251	5.31677	5.69862	4.90082	5.1074	4.96558	5.93905	6.45975	4.97612	4.32971	4.86814	5.53953	6.67762	5.7044	5.20777	5.65253	5.98858	5.18734	5.22717	4.91043	4.90588	5.68624	5.90622	5.40414	4.70673	5.5254	5.18708	4.78917	5.15694	4.81395	5.67986	5.14245	4.64045	5.61693	5.57788	5.76038
ppa_stranded_DN16014_c0_g1_i2	2.98485	1.30135	3.93159	1.98749	0.879202	1.60502	1.40911	1.69315	2.42157	1.36356	1.35414	2.01035	2.71115	2.15176	3.9091	2.0946	1.76308	1.84958	2.36533	2.01588	2.11014	2.62854	2.43344	2.54636	3.8933	3.87133	2.97831	4.52262	4.29604	4.94452	4.51622	4.72898	4.91267	4.51176	4.31933	3.92593	4.99379	5.37286
ppa_stranded_DN16015_c0_g1_i1	-1	-1	-1	1.34629	0.0489235	1.12779	-0.227112	1.15442	0.660991	1.05152	1.13207	2.37937	3.08231	0.133698	2.23173	-0.407673	-1	1.17976	-0.394997	0.952367	0.722139	0.447268	1.81854	0.685806	0.337469	-0.313055	-0.383757	0.00209575	0.722464	0.694355	0.42153	-1	0.121194	-1	-1	-1	0.113732	0.0320706
ppa_stranded_DN16028_c0_g1_i1	2.87139	3.144	-1	-1	-1	0.94218	0.709582	0.790727	1.19883	2.87074	-1	1.13962	2.26998	-0.407701	0.170466	-1	1.1785	0.322251	-1	1.743	1.74679	1.24066	-1	1.00016	-1	-1	2.43092	-1	-1	-0.26103	-0.665934	-1	-1	4.19159	-1	-1	-0.735438	0.603075
ppa_stranded_DN16041_c0_g1_i1	5.91952	6.02985	6.46967	6.94961	6.24548	6.15364	6.28927	6.67028	6.86413	5.98023	5.77236	5.81412	5.58636	6.01867	5.83271	6.49888	6.01786	6.32649	6.02812	6.15929	6.1395	5.77816	5.45519	6.25805	5.98959	5.77	5.88788	6.22734	6.28941	5.96668	5.68733	5.55194	6.29531	6.06657	4.97989	5.14549	6.02269	5.86117
ppa_stranded_DN16047_c0_g1_i1	1.73168	2.1932	-1	1.97018	1.22496	1.69904	1.17914	0.593413	1.41163	1.02606	0.67551	2.16262	1.71277	0.873072	-0.0817251	1.58245	0.519894	1.68661	-0.751514	1.08945	1.22298	1.2196	0.633732	0.877386	-0.0964622	0.867109	0.981198	1.62929	1.71908	0.194969	1.08416	0.358871	1.98559	1.43083	0.879743	-1	1.66422	1.92693
ppa_stranded_DN16052_c0_g2_i1	2.31287	2.94382	3.17686	2.98541	2.6636	3.42907	3.81581	3.63745	4.1074	3.92676	2.52783	1.92937	2.29612	2.29424	1.99949	3.92951	3.51952	3.70471	2.94738	2.91149	3.07045	1.94133	1.41143	2.95764	3.10582	3.65039	3.24696	3.18117	2.96132	2.67456	3.07886	2.82654	2.65739	3.43076	4.27673	3.54068	3.71164	3.9186
ppa_stranded_DN16077_c0_g3_i1	5.29943	6.07839	6.15877	5.61555	5.27858	4.38963	5.15094	5.30143	5.21424	4.93439	5.41118	4.46745	4.5814	5.8646	5.27505	5.83507	4.94868	4.79785	4.07227	4.90051	5.37257	4.71864	5.3683	5.64819	5.41086	5.23716	5.12301	5.58865	4.73163	5.11754	4.53211	5.54161	5.54457	5.94048	5.45649	6.17849	6.91854	7.01501
ppa_stranded_DN16098_c0_g1_i1	2.16139	-1	-1	-1	2.02217	0.776041	1.23089	1.53499	1.2132	1.59597	1.40541	3.31703	2.53167	2.11445	-0.0286191	-1	-1	-1	-1	-1	-1	-1	-1	-0.284641	-1	-1	-1	-1	0.190515	-1	-0.737697	-1	-1	-1	-1	-1	-1	-1
ppa_stranded_DN16122_c0_g1_i1	-1	-1	-1	2.48345	-1	-1	1.11958	0.155555	1.55006	1.24589	2.58818	0.204793	2.3466	-1	0.0684565	-0.121716	-0.571273	0.941419	-0.223182	0.427291	0.243428	-0.686553	-0.600265	0.663415	-0.23628	-0.317295	-1	-1	-0.855548	-1	-0.474318	-0.504171	-1	0.878908	-0.602323	-1	-0.616342	-0.560835
ppa_stranded_DN16130_c0_g2_i1	1.59518	4.21654	4.05005	-1	-0.881673	0.958413	1.03715	1.53008	2.12381	2.02425	1.42513	2.23321	3.43711	-1	0.47149	2.22294	1.38347	-1	0.637775	1.27091	1.57711	0.999185	1.09161	0.275174	1.8463	0.995864	-1	1.15928	0.610751	-1	0.0943074	-0.293769	-1	-1	0.560926	-1	0.0265464	-1
ppa_stranded_DN16133_c0_g1_i1	1.42504	4.57473	4.7298	4.07607	2.22968	1.89864	1.75163	3.70092	3.32431	4.22337	2.94637	2.67966	3.14565	2.84626	3.00063	3.49906	3.94588	2.66287	3.05819	2.52725	3.13593	2.30775	2.63724	3.31631	3.14026	3.05406	0.72782	2.15642	1.5559	2.31627	2.52102	3.15718	3.24575	3.09111	2.54294	3.6106	3.69808	3.83484
ppa_stranded_DN16136_c0_g1_i1	-1	3.12459	-1	-1	-1	-1	-1	-1	-1	-1	-1	-1	-1	-1	-1	-1	-1	-1	-1	-1	-1	-1	-1	-1	-1	-1	1.15262	2.53772	1.39078	3.91308	4.06308	5.1514	5.35556	4.48643	4.73512	2.91626	3.19508	0.902292
ppa_stranded_DN16139_c0_g1_i1	-1	0.981156	-1	0.451953	-1	-1	-1	-1	-1	-1	-1	-1	-1	-1	-1	-1	-1	-1	-1	-0.561684	-1	-0.706998	-1	-0.0507129	1.07787	-1	5.08151	3.67648	1.33426	5.19301	4.92796	6.73082	6.36207	6.70581	5.23847	6.85082	5.1301	3.42718
ppa_stranded_DN16152_c0_g2_i1	2.53134	4.00967	2.04353	2.9138	2.79462	2.13478	3.11469	2.98599	3.53059	6.27096	2.33671	2.73601	1.95781	2.5487	3.27799	2.94374	4.97276	3.09465	3.06195	2.65483	2.84432	2.38801	3.31875	3.58643	3.5359	2.83121	2.28273	1.64441	1.63225	1.2406	0.242729	1.20226	1.82866	-0.296459	0.855291	1.94745	0.543864	0.148231
ppa_stranded_DN16165_c0_g1_i1	-1	-1	-1	-1	-1	-1	-1	-1	-1	-0.463981	-1	-0.48402	-1	-1	-1	-1	-1	-1	-1	-0.22484	-0.0377153	-1	0.378438	-0.38829	-1	-1	-0.304208	-1	-0.605673	-1	-1	-1	-1	-1	-1	-1	-1	-1
ppa_stranded_DN16165_c1_g1_i1	-1	-1	-1	-1	-1	-1	-1	-1	-1	2.20018	-1	1.97871	-1	1.59793	-1	1.8673	-1	-1	-1	0.887257	2.84915	0.685951	2.72804	1.11163	1.77905	-1	0.525944	1.40092	1.17469	1.85734	1.86069	1.84981	-1	-1	-1	-1	-0.231595	-1
ppa_stranded_DN16177_c0_g1_i1	1.95708	4.02943	4.15581	3.4293	5.8379	2.25003	2.90351	3.11109	3.00789	2.89965	3.14973	3.04791	2.37662	3.60579	3.63217	3.81324	4.2317	4.00232	2.94816	2.66432	2.79207	3.21756	2.63077	3.4398	3.6349	3.18218	3.60765	3.94883	3.42163	4.06254	3.99199	4.40758	4.97534	4.53636	5.01761	4.80231	5.52299	5.69685
ppa_stranded_DN16189_c0_g2_i1	0.231796	-1	-1	-1	-1	-0.68338	-1	0.169743	0.865928	-1	0.493885	0.393245	0.17109	-1	0.0939694	-0.806323	-0.79394	-1	1.01154	-0.464106	0.0785172	-0.900452	-1	-1	-1	0.485712	2.35725	1.6247	1.19442	2.01189	1.8135	0.272589	1.05192	0.983632	-0.754836	0.760615	0.525449	0.445661
ppa_stranded_DN16193_c0_g1_i1	6.28029	7.54951	8.07848	7.62627	7.18204	6.54269	7.42045	7.08476	7.24782	7.01567	6.82012	6.793	7.26589	7.27111	7.05558	7.66884	8.38224	6.98585	7.60983	7.30676	7.02579	6.73051	6.65201	7.75095	7.54124	7.7274	6.96753	7.66903	6.24014	6.36743	6.50208	6.73458	6.98264	7.38736	8.79345	7.50017	7.47591	7.46669
ppa_stranded_DN16198_c0_g1_i1	2.50705	3.61882	3.25456	3.02662	1.24771	2.83264	2.58454	2.11248	3.12294	1.42147	1.5907	1.91005	2.64109	1.94854	1.79535	1.88834	1.37877	2.25694	2.37805	2.40927	2.52884	0.846918	1.60061	0.562615	1.27295	0.554164	0.88828	1.21308	2.53492	1.3579	1.52036	-0.461365	-0.126343	-0.597728	-0.439055	1.83041	0.0767554	-0.0690027
ppa_stranded_DN16199_c0_g1_i1	3.97981	5.43203	4.74229	4.95437	3.73109	3.6636	3.79743	3.48089	4.59689	7.92473	3.7937	2.97659	3.25488	2.1937	3.57507	3.42793	2.82355	4.20733	2.63428	3.4861	2.82554	2.00063	2.66068	2.66689	2.767	3.13985	3.32515	3.94384	3.62781	3.41612	4.24288	2.92569	2.90902	2.76462	1.55485	1.85474	2.24565	2.58429
ppa_stranded_DN16203_c0_g1_i1	1.87821	4.27492	3.64067	-1	-1	3.4342	2.93559	1.03028	2.28427	2.59462	3.37949	1.92244	4.48992	2.41394	2.77502	1.57394	0.660581	4.18315	1.04179	1.33928	2.80874	1.70892	1.98858	2.3606	1.32569	1.56398	0.271681	1.85417	-1	0.775848	-1	-1	1.40523	1.88404	-1	-1	0.159709	-1
ppa_stranded_DN16206_c0_g2_i1	2.82826	3.31233	2.13203	4.21092	3.10751	2.45584	3.50469	3.10658	4.11931	4.00326	3.10661	3.04672	2.98249	3.4845	3.02149	2.60151	2.55678	3.68914	5.1105	3.27935	3.34754	3.01825	2.93812	3.62488	4.27438	4.15597	3.39972	4.93925	4.11822	4.89765	4.77174	5.31599	4.65411	4.68182	4.44961	5.78948	5.79772	6.25636
ppa_stranded_DN16220_c0_g1_i1	3.39513	-1	-1	-0.113801	1.86733	0.476719	-0.439497	0.815842	2.01895	2.01813	-0.257551	-0.148041	-1	-1	-1	1.51449	3.95726	1.60615	0.408892	0.204427	0.985604	0.714049	0.231099	-0.622382	2.01098	2.17215	-0.104063	1.52696	0.806975	-0.323488	0.139135	0.0901397	-0.0728174	-1	0.112324	-1	0.0156297	-0.283746
ppa_stranded_DN16221_c0_g1_i1	-1	-1	-1	-1	-1	1.71753	0.163707	-0.71346	1.45935	3.05032	2.29759	-1	-1	0.943836	0.811452	-0.42421	0.275453	1.03967	-1	1.03838	-1	0.480853	-0.507576	-0.58904	2.11626	2.42419	1.17051	-0.0465888	-0.479023	-1	-0.504657	-1	-1	-1	-1	-1	-0.481938	-1
ppa_stranded_DN16231_c0_g1_i1	3.18467	-1	-1	-1	-1	-1	-1	-1	-1	-1	-1	-1	-1	-1	2.41166	-1	-1	4.337	-1	-1	-1	1.14097	1.02997	-1	2.05161	-1	2.64899	-1	-1	-1	-1	-1	-1	-1	-1	-1	-1	-1
ppa_stranded_DN16239_c0_g1_i1	1.86877	-1	-1	0.51781	-0.444862	0.138723	-0.0529092	0.364383	0.369227	0.688947	1.05344	0.416997	0.131622	0.150754	-0.246423	-0.119921	0.0732628	0.800633	-0.836207	-0.767113	-0.547827	-0.796133	-0.536281	-0.298506	0.0673202	-0.732457	-0.0842945	0.0644709	1.01724	0.175716	-0.442055	-0.0211272	-0.703623	0.202594	-1	-1	-0.928186	-1
ppa_stranded_DN16250_c0_g2_i1	5.10411	5.47579	6.76889	6.50183	5.72853	4.76043	5.23456	5.51109	5.83992	4.92541	5.27218	5.61963	5.17124	6.06902	6.99241	6.28714	6.07262	5.48307	5.63703	5.63331	5.67054	5.52484	5.51515	6.2197	6.12567	5.73262	5.67042	6.31006	5.63808	5.9381	5.95515	5.86276	6.30142	5.78615	5.83447	5.93047	6.529	6.27591
ppa_stranded_DN16257_c0_g2_i1	0.201975	-1	2.48602	0.485115	0.232806	-0.338158	-0.377118	-0.0840229	0.944624	1.36892	1.115	0.676132	1.2581	0.721287	1.45127	1.25975	0.121945	0.646978	0.146371	1.79717	2.25495	1.12147	1.62028	1.11617	1.51222	0.208891	-0.0578905	1.07181	0.624691	0.256736	1.77788	0.0215479	0.00757934	0.336221	-0.612306	-1	0.129216	0.240385
ppa_stranded_DN16262_c0_g2_i1	3.74048	0.914825	3.41629	-1	-0.964474	-1	-1	-1	-1	-1	-0.322032	-1	-1	1.07008	0.554169	0.873882	-1	-1	-1	-0.261998	-1	-1	-1	-1	-1	0.67059	-1	-1	-1	-1	-1	-1	-1	-1	-1	-1	-0.817906	0.144773
ppa_stranded_DN16268_c0_g2_i1	1.41534	1.79586	1.30109	1.42391	1.09379	0.702263	0.645665	1.57154	1.95752	0.641962	1.57585	0.921918	0.974053	1.7742	0.811682	1.66671	1.50864	1.26748	1.23372	1.90311	0.949622	0.181865	0.898499	1.20359	1.87301	1.69339	1.28434	1.39559	1.01328	1.01428	1.86359	3.27638	3.55753	3.77139	3.04916	3.99545	3.53579	3.03235
ppa_stranded_DN16270_c0_g2_i1	1.48435	1.98596	1.81738	1.7947	1.37067	1.7039	1.42057	1.44083	1.72067	1.22008	0.630184	1.71316	0.758739	1.71499	0.885368	1.6568	0.903437	1.30894	1.14549	1.37083	1.49361	1.20642	1.07361	0.96246	1.11712	0.335905	0.318681	0.0252673	1.04309	-0.0186882	0.139213	-0.289246	0.263169	0.611824	-0.169734	-0.24419	-0.280868	0.267203
ppa_stranded_DN16276_c0_g1_i1	6.07293	7.33886	6.5556	4.46672	5.1312	3.53107	0.687798	4.13387	1.59479	4.58455	6.47455	5.94674	5.75249	4.18022	4.60778	4.33127	2.84641	1.83109	3.45678	5.27378	4.65224	4.23075	4.16801	2.93043	3.80629	0.584465	2.34253	2.20586	3.90795	4.78491	4.75612	2.87902	3.44458	3.42897	1.97101	3.56482	2.28709	1.47854
ppa_stranded_DN16282_c0_g2_i1	1.55698	-1	-1	-1	-1	2.70958	-1	1.5789	-1	0.047879	3.72563	4.72855	4.13113	2.58522	3.11858	-1	0.659343	-1	-1	4.60175	4.33297	2.41942	-0.0409668	-1	-0.216743	-1	-1	0.134615	-0.486687	4.11524	2.1058	-1	-0.227027	-1	1.38678	-1	-0.398502	-0.20262
ppa_stranded_DN16283_c0_g2_i1	1.08393	2.71705	3.97754	2.52404	3.63788	0.748478	0.111149	0.605748	2.38981	2.90745	2.72971	2.40414	2.47774	2.58936	2.86698	2.75989	1.7285	2.13153	-0.0107898	2.36806	3.09683	2.41259	2.38298	3.26259	1.34654	0.730094	0.0529413	2.56728	3.84128	3.70544	4.31276	2.46307	2.16673	1.92287	1.22845	2.43328	1.18185	1.73544
ppa_stranded_DN16291_c0_g1_i1	0.643089	-1	-1	2.11109	1.55471	1.22369	2.53625	1.15669	2.66678	3.13666	-0.26582	0.88948	1.15549	1.55836	1.05867	3.05554	2.03062	1.90133	1.01903	2.78789	2.40846	1.8058	2.88526	3.25472	2.05806	1.62238	2.72858	2.28381	2.23508	0.787105	1.13179	0.83746	1.66512	1.03482	1.04858	0.792376	1.74658	1.30921
ppa_stranded_DN16305_c0_g1_i1	2.27318	3.35169	4.10281	3.43439	2.65005	2.38319	2.58067	2.98123	2.98196	5.76877	2.34041	2.44535	2.49045	3.25278	2.79303	3.55091	3.67818	3.30495	3.41065	2.81614	3.17115	3.00173	2.64383	3.12038	3.49314	2.87947	2.2627	3.33853	2.52382	2.80879	2.87618	4.07555	4.02583	3.51226	4.64068	4.16539	4.69052	4.74943
ppa_stranded_DN16308_c0_g1_i1	7.42632	8.19286	9.39342	9.20846	8.65656	8.41873	8.93853	8.89868	9.13548	8.52761	8.14378	8.19247	7.57328	8.5374	8.32458	9.32577	8.91113	8.74831	8.13951	8.56052	8.7687	8.23397	8.05175	8.7334	8.86342	8.89183	8.0418	9.17039	8.37331	8.51311	8.33315	8.3798	9.04186	8.80622	7.79665	8.13621	9.56047	9.40921
ppa_stranded_DN16311_c0_g2_i1	-1	-1	-1	-1	-1	-1	-1	-1	-1	-1	-1	-1	-1	1.30611	-1	-1	-1	-1	-1	-0.778802	-0.320622	-0.203415	-0.53051	-1	-1	-0.144452	-1	-1	-1	-0.434836	-0.00442013	-1	-1	-1	-1	-1	-1	-1
ppa_stranded_DN16317_c0_g1_i1	2.74692	3.50778	2.62342	-1	-0.831405	2.64498	2.10381	1.5295	2.04171	2.39954	1.97582	2.68138	1.59048	1.84179	1.58041	1.53773	0.485524	1.82754	1.41313	-0.434345	-1	1.07606	1.9221	0.704175	0.260662	0.729114	1.65793	0.381071	3.12865	0.677309	1.39036	-0.536153	0.132622	1.17179	0.42443	0.692811	1.00106	0.972287
ppa_stranded_DN16336_c0_g1_i1	-1	-1	1.43	-1	-1	-1	-1	0.346648	-1	-1	-1	-0.111257	-1	0.638802	-0.254823	0.972157	-1	-1	-1	0.99176	1.4102	0.169528	0.524671	0.71612	0.917123	-1	0.148418	1.26954	0.250252	1.83395	0.279246	-0.452306	1.22129	-1	0.254486	-1	1.34237	0.76757
ppa_stranded_DN16337_c0_g1_i1	-1	-1	-1	-1	0.857937	-1	0.390829	-1	3.82966	5.97703	-1	-1	-1	-1	-1	-0.156248	-1	-1	2.97558	-1	-1	-1	-0.177345	-1	-1	-1	0.719225	3.24247	2.92051	-1	-1	-1	-1	-1	-1	-1	-1	-1
ppa_stranded_DN16353_c0_g2_i1	6.88444	7.29746	7.45909	7.41988	7.43574	6.80063	7.4446	7.1728	7.47052	7.25729	6.73228	7.12449	6.37215	7.59565	7.47012	8.15691	8.42424	7.2568	6.43787	7.1832	7.63532	6.45437	7.44633	7.04075	6.81964	6.94922	6.54182	6.65792	7.13744	6.45108	6.33619	6.61493	6.09446	5.95477	5.16294	5.56791	6.23294	6.48965
ppa_stranded_DN16364_c0_g1_i1	1.07069	0.907789	2.02587	-1	1.37926	-0.569692	-0.376035	0.0849824	-0.238614	-0.114835	-1	-0.321918	0.997673	-1	0.391437	-0.167821	0.212966	-0.143788	-0.0683311	0.590466	0.476542	-0.542452	-0.108907	0.312941	0.275235	-1	-1	0.16836	-0.275191	-0.937537	-0.679351	-0.528014	0.253816	-1	-1	-1	-0.610274	-0.56195
ppa_stranded_DN16374_c0_g1_i1	2.86171	3.64531	3.76824	2.99314	3.39607	2.87662	3.38343	3.84288	4.33703	3.6654	2.95748	3.10346	3.18273	3.91594	4.67802	3.31736	3.57887	3.66094	2.01634	3.2661	3.54177	2.96606	3.45059	3.25076	3.57145	3.1576	2.84999	3.42927	2.98644	3.32728	3.39025	3.95761	3.59901	3.08525	2.71866	4.07609	3.89443	4.00502
ppa_stranded_DN16383_c0_g1_i1	4.53855	4.10727	5.3504	4.83383	4.68455	2.84317	2.91901	3.4052	2.43332	3.45022	2.32077	3.94803	4.29095	3.03781	2.01934	3.98659	2.27564	1.32192	0.153114	2.90082	3.01851	0.739088	1.46448	0.575366	1.65038	0.981343	-1	-1	-1	0.880913	0.270214	0.209303	1.55038	-1	0.737941	-1	1.39016	-1
ppa_stranded_DN16402_c0_g1_i2	1.88736	2.96048	1.79085	2.01524	0.967421	0.369719	1.19162	0.958084	1.67923	2.71901	1.05565	1.80113	1.04776	1.64096	1.1968	1.8295	1.38848	1.54853	0.770263	1.95851	1.98792	1.15449	1.02156	1.20718	0.942722	0.762306	-0.0425477	1.14457	1.22719	0.57172	1.01664	0.634151	1.44993	1.05658	0.392777	2.33069	0.756035	0.959269
ppa_stranded_DN16418_c0_g1_i2	3.2003	4.07442	4.37005	1.07674	2.08437	2.79739	3.18283	3.37516	4.14004	4.6959	4.179	3.42199	3.72737	2.81613	3.2396	3.53086	4.9218	3.03779	1.96696	3.00476	3.23154	2.19218	1.64866	2.28575	1.95186	1.98015	1.85171	2.37989	1.64262	2.04116	2.29626	2.23773	1.82145	2.58319	1.19527	0.145194	1.33095	1.26081
ppa_stranded_DN16419_c0_g1_i1	2.84661	4.73973	4.41024	4.67529	4.86347	3.75883	4.00948	4.2594	4.69027	3.98047	3.57095	2.94241	4.28301	3.95309	4.90058	4.33322	4.26079	4.44133	3.30096	3.6724	4.31886	3.73623	4.03442	4.29681	4.24563	3.92266	3.95586	3.81085	3.91787	3.82313	3.50091	4.34548	4.38049	4.34204	4.62946	3.7083	4.98917	4.86089
ppa_stranded_DN16422_c0_g1_i1	2.56185	4.45932	5.9333	2.47832	2.87415	3.06095	3.03642	2.52569	3.17778	2.1374	2.64395	2.38349	2.5164	3.09082	2.44736	2.78127	2.78818	3.58221	3.09403	3.34105	2.60984	2.91903	2.91869	2.92981	3.79053	3.46239	3.32094	3.64217	3.74856	4.05687	4.27635	3.15308	3.1197	2.77111	5.4671	3.45041	3.89485	4.08159
ppa_stranded_DN16438_c0_g2_i1	1.06663	0.62259	-1	2.81377	-0.974128	1.29647	0.399874	1.54528	1.909	2.77106	1.99454	0.633777	2.53627	0.736635	1.22309	2.05153	1.01563	0.985667	1.59369	0.80316	0.244694	-0.0357212	0.0075462	0.591053	1.15125	0.0763677	1.81336	0.783345	0.240285	2.23983	1.74557	2.7375	3.69487	4.333	2.43357	2.65685	1.42589	0.98407
ppa_stranded_DN16446_c0_g1_i2	3.57228	4.03048	5.18478	3.93926	3.48653	3.03096	3.85999	4.37223	4.212	4.60892	4.03431	4.01329	3.84392	4.56705	3.47845	3.60463	3.98082	3.53168	3.09559	3.58003	3.58668	2.98441	3.71211	4.13721	4.32022	4.01236	3.40743	4.11061	3.16416	3.61759	4.14601	4.18041	4.36747	3.07494	4.40201	4.60181	4.67913	4.9696
ppa_stranded_DN16448_c0_g2_i1	1.2966	0.404009	0.0502696	2.86083	0.0620212	0.70946	0.608883	0.630349	3.74456	3.54975	4.06117	1.41024	2.48092	-0.129836	3.24121	1.8062	2.0987	0.650693	5.0987	3.84929	1.63162	1.02002	1.45923	2.03605	2.0739	1.75884	1.8673	2.60991	4.67841	1.63761	1.80107	1.46485	2.53661	2.70947	3.02949	2.13365	2.2277	1.91664
ppa_stranded_DN16451_c0_g1_i2	4.28696	5.03116	4.30493	4.55399	3.83974	4.43579	4.91948	4.26028	4.98309	4.71124	4.03575	3.91402	4.23135	4.29066	3.2161	4.5583	4.85607	4.38879	4.49974	3.31311	3.73283	3.05237	3.79408	3.96281	3.40668	4.17659	4.58137	4.39138	4.08293	4.1889	3.89184	4.47648	4.25771	4.71537	3.42393	3.30925	4.89189	5.11145
ppa_stranded_DN16452_c0_g3_i1	1.79557	3.61518	4.64798	3.52975	4.90752	2.78049	3.75365	3.65032	4.58664	3.70748	3.15149	3.30769	2.90809	3.13531	2.32117	3.16892	4.14606	4.11217	3.66463	3.387	3.04442	3.24845	3.04421	3.26905	3.24488	3.27758	3.65665	3.87933	4.81039	3.88394	3.7348	3.46469	3.74936	3.58781	4.54307	2.59558	3.87784	3.62604
ppa_stranded_DN16463_c0_g1_i1	2.37065	-1	5.14598	3.016	0.840216	0.811982	2.5236	3.41315	2.49323	2.45157	3.3517	1.67199	1.25557	2.68074	1.76121	2.70122	1.1521	1.56403	0.835055	2.07706	0.288934	0.454131	1.99523	0.617891	1.15186	0.965079	0.211861	0.726433	0.987039	0.241945	-0.15893	0.245728	-0.30397	1.21739	0.738458	0.821412	0.489485	0.144301
ppa_stranded_DN16469_c0_g2_i1	-1	-1	-1	-1	-1	-1	-1	-1	5.33761	8.39355	6.70915	6.06317	5.52973	2.56556	-0.0504528	1.22145	-1	-1	3.24555	4.53111	3.12155	3.09609	2.21329	-0.440825	0.829576	0.149863	-1	-0.287358	3.72179	5.8056	3.84937	1.87589	1.0467	0.542749	0.972931	1.15319	0.318171	0.110503
ppa_stranded_DN16473_c0_g2_i1	-1	-1	-1	-1	7.51887	1.00182	-0.542019	-1	-1	0.374337	-1	-1	-1	0.728632	-1	-1	-1	-1	-1	-1	-1	-1	0.145948	-0.72907	-1	-0.627307	4.68041	-1	-1	-0.648968	-0.63997	3.76522	4.95656	6.72466	6.52802	7.24804	6.93139	7.03347
ppa_stranded_DN16480_c0_g1_i1	2.40823	-1	-1	-1	-0.793537	-1	1.67139	3.81881	5.14848	4.22847	-1	0.260054	-1	0.498566	2.17069	-1	-1	3.79267	0.639481	0.156774	-1	-0.478038	-1	0.628492	-1	0.819165	4.57852	-0.433327	-0.541414	-0.661584	0.805999	-0.165587	1.29898	-1	-1	0.630455	-0.108559	-0.563935
ppa_stranded_DN16484_c0_g1_i1	5.69212	5.97645	5.63656	5.73654	5.7599	4.47683	4.12943	4.73294	6.60274	6.46807	4.87333	6.04574	5.54928	3.9641	4.43878	5.25549	4.46765	4.83131	5.93942	4.5089	4.57771	3.4467	4.07691	3.20032	3.24651	2.65725	1.91849	2.80681	3.6018	3.43901	3.38398	2.91245	3.21383	2.89532	2.28257	1.01247	2.74253	1.73064
ppa_stranded_DN16485_c0_g1_i1	3.56634	5.68203	4.91897	3.83032	1.42125	-0.161746	2.19515	2.95745	3.28892	3.80266	3.00037	0.725356	1.85217	1.65975	-1	1.50985	0.605138	1.06938	-1	1.32636	2.56472	1.51527	2.00146	1.65093	2.43895	1.54934	0.0470179	0.137976	1.35048	0.916739	2.30397	1.3924	3.16917	2.85446	2.17449	3.42163	2.32285	2.72202
ppa_stranded_DN16485_c0_g2_i1	4.12632	-1	-1	3.70747	-0.890669	2.27625	3.34346	2.88494	5.42148	5.90729	4.93043	5.76415	5.30794	3.71036	4.67439	4.28978	3.14043	2.72388	5.44249	4.3491	3.97396	3.75325	3.27518	3.28467	3.68071	2.57012	3.28373	4.30979	2.86447	3.82939	4.26681	2.48823	2.61591	2.55184	0.498227	2.61286	2.61421	2.71239
ppa_stranded_DN16486_c0_g1_i1	4.68816	5.38898	4.75154	2.91174	3.86265	3.34812	3.36992	3.74962	4.03213	4.00629	3.72374	4.02582	4.36855	4.05102	4.55051	5.03975	5.88977	4.74225	4.10014	4.57324	4.78106	4.16107	4.41957	4.60265	4.79885	4.43388	3.88232	4.79026	4.58359	5.26954	4.65137	4.97409	5.25306	4.94918	5.11279	5.74853	5.5469	5.7395
ppa_stranded_DN16492_c0_g2_i1	-1	-1	-1	-1	-1	-1	-1	-1	0.177335	-1	-1	-0.133093	1.28755	-1	-0.599247	1.09889	-1	0.0326945	-0.0250675	-1	0.344856	-1	0.174273	1.7952	0.717803	-1	-1	-1	-0.612829	0.0586755	-0.556376	-0.343213	-1	-0.34528	-1	-1	0.0316752	-1
ppa_stranded_DN16501_c0_g1_i4	1.75216	2.42977	2.60973	2.92791	2.33138	2.50463	2.80902	3.04842	3.03742	2.38429	2.39247	2.43489	2.61838	2.69814	2.17787	2.48174	2.03066	2.33665	2.3083	2.59944	2.30116	2.48977	1.75753	2.10141	1.55628	1.52015	1.81902	1.91982	1.86203	1.46797	1.9123	0.637927	1.88422	1.51762	0.508141	0.845043	2.37567	2.05358
ppa_stranded_DN16503_c0_g1_i1	3.36747	3.37592	4.13525	2.81223	0.222949	2.85666	3.16282	3.12002	2.73597	3.16957	2.07358	2.28923	0.940478	2.68029	1.23185	0.775503	-1	0.692636	-0.302804	0.824694	1.34408	-0.103407	0.526066	2.56602	0.158249	-0.101255	-0.405211	0.0122761	-0.758559	0.215189	0.891944	0.218577	-1	-1	-1	-1	-0.146264	-0.316926
ppa_stranded_DN16509_c0_g2_i1	2.90814	0.918003	3.65261	2.25047	1.89043	2.35504	1.41604	2.22352	2.71106	1.828	2.47254	1.70977	2.51618	0.969676	2.50377	2.71019	3.63184	2.36626	2.41824	2.43268	2.15071	1.84586	1.06981	2.39246	1.9551	1.82544	0.736913	1.94908	2.08178	1.44951	1.7855	2.14398	2.80279	2.38633	2.09377	2.68904	1.68903	1.60026
ppa_stranded_DN16513_c0_g1_i1	3.01308	4.15912	3.86075	2.88993	2.2649	2.52141	2.75001	2.72722	2.927	2.78073	2.23721	2.76763	2.87451	3.13172	2.6486	3.35658	2.31812	2.75041	1.75476	2.73535	3.07198	2.52084	1.98239	2.59319	2.64566	2.89547	2.71235	3.68157	3.26239	3.35656	3.29702	4.35229	3.98844	4.18552	2.93901	3.78903	4.79485	4.81354
ppa_stranded_DN16515_c0_g1_i1	1.97189	3.85905	4.58218	3.4394	3.46847	3.41386	3.42209	2.31601	-1	2.16854	1.24581	0.493971	1.69919	2.79538	6.51804	5.17825	2.99858	1.65834	0.867352	-1	2.50185	0.923999	2.31086	3.09656	3.66696	3.85006	1.15133	0.649353	-1	0.548657	0.0690349	2.51731	0.799215	2.27037	0.786344	1.62313	0.197326	1.91976
ppa_stranded_DN16527_c0_g1_i1	1.757	1.04266	2.80123	2.41247	1.53846	1.53579	2.05116	1.85453	2.37264	1.5262	0.577423	1.01508	1.95928	1.38086	0.643734	1.64772	1.533	1.32534	0.0722302	0.789865	1.34674	1.30194	1.09714	0.203355	1.49636	0.924314	0.744424	1.5741	1.46135	0.807008	1.17826	0.462794	1.77608	1.78486	1.10086	1.33302	1.94363	1.86313
ppa_stranded_DN16529_c0_g2_i1	7.24124	8.68268	7.13515	7.5139	7.49559	6.45342	4.73287	7.6031	8.10197	9.95669	5.66897	6.75529	6.99624	6.25307	6.96242	6.74977	6.62265	6.38477	6.3204	5.71421	5.74745	4.63451	6.11406	5.00124	5.7036	4.11666	1.73162	4.84131	4.70847	4.69453	3.99351	5.09672	4.88834	5.3506	4.38118	3.85501	5.57282	3.89805
ppa_stranded_DN16530_c0_g1_i1	3.61859	4.19473	4.68372	3.84801	4.48066	3.24521	4.44079	4.40234	4.435	2.95588	3.18189	2.82282	3.37023	2.49981	2.57397	3.90386	3.56172	3.02967	4.32181	4.14226	3.34147	2.27889	2.83367	3.04814	3.12114	2.38918	3.85154	3.09755	3.2434	3.75028	2.61602	3.13891	3.23171	5.40829	3.00521	3.6114	3.77375	3.97559
ppa_stranded_DN16532_c0_g1_i1	3.49443	3.90579	3.2113	3.63997	3.16256	2.90791	2.61136	2.31213	3.20218	3.39492	2.60796	2.11044	3.12237	3.53973	2.63933	3.26669	3.1304	2.4741	2.79294	2.65332	3.04226	2.33319	3.15174	2.72711	2.35862	2.33573	1.408	2.17875	1.23186	0.574591	1.29264	2.33069	2.03907	2.48927	1.02468	2.38996	0.915742	0.815661
ppa_stranded_DN16537_c0_g1_i1	4.09818	4.1171	5.33182	4.9885	4.15672	4.00193	4.91069	4.85897	5.22855	4.23372	3.848	4.12797	3.84361	3.97014	3.81966	3.80883	4.51079	3.41129	3.45135	3.96716	3.31156	3.27591	2.53747	3.79311	3.51945	3.17862	3.19557	3.43942	3.74548	2.98729	3.70486	2.363	3.35159	3.84999	2.55051	3.40155	4.19815	4.53113
ppa_stranded_DN16539_c0_g1_i1	2.60125	-1	0.954365	1.33996	-0.911582	0.636564	1.14354	1.77754	1.91696	2.14694	1.98304	1.05671	1.42179	1.42989	0.880257	-1	-1	0.287575	-1	-1	0.231791	-0.0679799	-0.0484605	-0.252301	1.46029	0.83032	0.841364	-1	-1	-1	-1	0.379369	-1	-1	-1	2.46497	-1	0.317037
ppa_stranded_DN16542_c0_g2_i1	0.594059	0.831046	1.94617	1.20833	0.678507	-0.0450184	0.493605	0.791753	0.953108	0.712456	-0.21446	0.443463	0.0999324	1.17144	1.05651	1.45696	0.232815	0.480321	0.51266	0.746619	1.27934	0.91345	0.365998	0.835581	1.52703	1.30928	1.27106	1.32051	1.01781	1.86182	1.50568	1.22629	1.2565	2.01194	1.83931	2.62082	1.68489	2.46433
ppa_stranded_DN16547_c0_g1_i1	3.0323	1.69147	4.20077	6.0138	2.37567	2.14485	2.69238	3.15395	3.31224	2.92719	2.66422	2.95432	2.11034	3.42717	3.12005	3.59081	3.30836	2.90674	2.74868	3.04629	3.03547	2.81122	2.42121	2.94897	3.41623	3.01205	2.51553	2.72977	3.41112	2.82384	2.45479	3.34248	2.85459	3.85834	2.96592	3.2582	3.33887	3.73799
ppa_stranded_DN16548_c0_g1_i1	1.51169	-1	-1	0.738807	-0.974535	1.45235	-0.376502	7.90767	7.97031	8.30403	1.41332	1.25417	2.73354	1.27728	-0.149847	-0.10961	-0.102758	7.28852	0.652685	1.94143	0.54317	-0.499931	0.517623	-0.730977	-0.467988	1.78201	6.964	2.78779	1.4435	1.56768	2.1391	-1	0.42444	-1	1.8718	-1	-0.137649	-0.254109
ppa_stranded_DN16553_c0_g1_i1	2.33167	2.44848	1.99029	2.79798	0.448738	1.67812	1.85715	1.51735	0.859456	1.11422	0.549102	1.97466	2.35125	2.34194	2.12763	0.637325	2.15019	0.0162608	3.38181	0.375967	1.15379	0.138413	2.02492	1.60492	1.65072	1.20612	0.822879	-1	0.854851	0.702766	0.868601	0.42426	0.880786	2.67353	0.355184	0.0345894	0.268965	0.462734
ppa_stranded_DN16556_c0_g1_i1	-1	-1	-1	-1	-1	-1	-1	-1	-1	-1	-1	-1	-1	-1	-1	-1	-1	-1	-1	-1	-1	-1	-1	-1	-1	-1	4.0677	4.74663	4.16672	5.16837	4.15173	5.2987	6.54555	6.42058	5.27673	5.59818	4.69338	2.8704
ppa_stranded_DN16557_c0_g1_i1	2.81232	2.76774	-1	3.97745	3.72061	2.25542	3.08093	3.03295	3.38034	3.58103	2.4428	2.6364	1.92835	3.75717	2.37237	3.17355	3.79199	3.31719	2.4352	2.14636	3.84541	2.87165	2.7279	3.56592	3.63697	3.39609	3.26518	3.7921	3.05221	2.63854	2.78347	3.65444	3.42636	4.20908	4.28664	4.46645	4.07223	4.4417
ppa_stranded_DN1656_c0_g1_i1	4.04257	4.86081	5.74606	4.02287	3.55282	4.22154	4.3851	4.56953	4.84729	4.72498	3.63814	4.07392	4.3793	4.74785	6.11223	4.36055	4.25907	3.91747	5.07501	4.10485	4.46031	4.22219	4.80234	4.64766	4.41183	4.271	5.46487	4.89909	4.59249	3.96602	4.13706	4.52228	4.7391	5.11761	6.14462	5.4601	5.45368	5.61643
ppa_stranded_DN16562_c0_g1_i1	1.24881	1.03778	3.38371	0.471211	2.95237	1.41816	1.87952	1.95958	1.91088	2.10772	2.14544	1.92341	1.28394	1.34339	1.10945	1.68398	2.04047	1.28421	3.74693	1.53877	2.15977	1.45666	1.51551	1.56719	1.93051	1.50011	2.05421	1.50517	2.02275	0.698732	1.35152	1.18399	1.25987	2.32335	1.4737	1.41599	2.22136	2.29163
ppa_stranded_DN16567_c0_g1_i2	7.53713	7.77213	8.09172	8.48136	7.36666	7.65226	7.98181	8.0536	8.5848	8.71095	8.73615	8.17225	7.78412	8.30351	7.58042	7.75826	8.22267	7.89579	7.83636	8.3135	8.04765	7.3195	7.70959	7.8641	8.12272	7.7459	7.65998	7.82278	7.92941	7.50682	7.79618	7.41151	8.01173	7.45964	7.60596	8.0496	7.95064	8.02006
ppa_stranded_DN16571_c0_g1_i1	4.29047	4.22459	3.69412	0.985155	0.30702	1.73694	0.0747348	0.944838	-1	4.29061	4.88218	5.87785	5.62429	4.19041	3.05591	1.44252	0.625051	0.483345	-0.749276	4.07587	5.28817	3.96754	4.84981	1.98698	1.07596	-0.119977	0.100327	-0.44328	-0.515457	5.30803	4.4441	2.96439	3.154	2.37828	1.43273	2.30867	1.33865	0.627189
ppa_stranded_DN16572_c0_g1_i1	1.19988	0.985779	2.78305	2.13809	0.154246	0.477626	1.03079	0.153547	2.21755	0.708718	1.87549	0.816901	1.03223	0.296869	-0.864413	-0.121732	-0.453282	-0.105537	2.85124	1.13013	1.06833	-0.596969	0.00409007	-0.575835	-0.227913	-0.509226	-0.579386	1.29491	0.393723	-0.176554	-0.395327	0.129912	-0.619837	-0.654805	-1	0.350197	-1	-1
ppa_stranded_DN16575_c0_g2_i1	1.03826	-0.664837	2.01747	1.56542	0.760155	1.16028	1.2543	1.31304	1.24861	1.17991	1.81319	1.73682	2.27326	0.688951	2.64193	1.39019	1.03457	0.678809	0.25624	0.934219	1.06508	1.58216	1.61491	0.157416	0.594489	0.355354	0.950446	0.0800008	-0.329052	0.574567	1.44188	-0.140334	1.06794	0.659835	0.245327	0.299115	1.07266	1.38877
ppa_stranded_DN16577_c0_g1_i1	0.149594	1.95557	-1	-1	-1	0.0990748	-0.270587	-1	2.52556	6.93482	7.66541	4.77729	5.49214	-1	-0.248441	1.13774	0.806081	-1	6.43881	6.69148	4.75802	1.40073	1.57194	1.34455	1.24094	0.13475	-0.112137	-0.50766	7.06235	4.28818	1.26089	-0.283658	-0.209693	-0.450615	1.87606	-0.19485	-0.83322	-0.725164
ppa_stranded_DN16580_c0_g1_i1	2.8975	3.17185	4.11428	1.71692	5.19769	1.32927	1.31643	1.6341	1.33644	1.86715	2.04242	1.17403	1.70268	1.85758	1.50354	2.36631	2.16692	1.87616	4.35556	1.49915	2.29458	1.63194	1.0719	1.5487	2.50994	1.83741	1.44891	2.60367	3.02906	2.848	2.92217	3.73317	2.67727	3.13034	3.72701	3.74542	3.65066	3.97492
ppa_stranded_DN16581_c0_g1_i1	4.96633	4.89156	4.80379	4.51837	3.46843	3.64338	2.53894	3.6433	3.99651	3.46424	2.64804	4.05346	3.45325	3.35362	3.1569	4.38049	3.64139	3.75189	3.33415	3.37823	3.7282	3.32562	3.553	3.96969	3.62037	3.44315	3.1219	4.11788	3.91614	4.20869	4.0624	4.6971	4.16195	3.93822	3.32688	3.46611	4.16803	4.60435
ppa_stranded_DN16586_c0_g1_i1	4.28967	3.07552	2.37152	3.64504	1.204	1.50177	1.94017	2.20358	0.559948	-1	1.34016	1.25626	1.60141	2.64951	4.63228	1.76822	1.68487	0.501051	2.10768	1.18188	1.1315	0.256676	2.49219	2.77428	1.93101	0.0762906	0.838601	-0.0604417	0.82619	0.319724	2.02226	-0.0717813	0.405937	-1	0.212934	-1	-0.134889	-0.367764
ppa_stranded_DN16592_c0_g1_i1	2.3448	3.36402	4.23904	4.42461	1.96316	2.4011	3.23423	3.2263	3.66637	3.77541	1.99398	3.00383	2.19723	3.35607	4.09403	2.94198	3.13435	3.62553	3.16476	2.80004	2.96707	2.96826	3.272	3.38964	3.48063	3.47135	2.60102	3.68094	3.77421	3.67935	3.30461	3.26456	3.59013	3.14571	2.69587	3.24347	4.13318	4.44378
ppa_stranded_DN16596_c0_g2_i1	1.68333	2.32303	1.31739	1.431	0.221135	0.0727282	0.901062	0.105888	0.879818	0.686074	0.934183	1.31555	1.88857	0.288891	3.08625	0.373712	-0.0805304	-0.143954	0.620838	0.77364	0.221015	0.487634	0.277756	0.234848	0.0421363	-0.170526	-0.589016	-0.261291	-0.177556	-0.595581	0.0949597	0.983753	0.2684	0.00561475	-1	0.408887	-0.279352	-0.521374
ppa_stranded_DN16608_c0_g2_i1	-1	-1	-1	-1	-1	-1	-1	-1	-1	-1	-1	-1	0.195563	-1	-1	-1	-1	-1	-1	-1	-1	-1	-1	-1	1.65768	-1	-1	-1	-1	-1	1.2329	0.273637	2.46488	0.660157	0.183426	-1	1.03642	-1
ppa_stranded_DN16617_c0_g1_i1	1.47943	1.32331	2.73355	2.35743	1.54041	1.40905	2.6198	3.24987	2.96324	3.21203	2.34523	1.31961	1.9128	0.882445	1.07215	2.35216	1.91976	3.43432	2.59707	1.52255	1.05856	0.518031	1.38739	1.60885	1.62635	2.65688	0.711238	1.65029	-0.33848	-0.648973	0.113879	-0.504599	-0.162084	-0.393212	-0.602689	0.258509	-0.199909	-0.333984
ppa_stranded_DN16619_c0_g1_i1	-1	-1	-1	-1	-1	-1	-1	-0.401252	-1	-1	-1	-1	-1	-1	-1	-1	-1	1.14072	-1	-1	1.04026	-0.668323	-1	-1	-1	-1	-1	-1	-0.472995	-1	0.795603	-1	-1	-1	-1	-1	-0.885941	-0.205598
ppa_stranded_DN16620_c0_g1_i1	2.4352	3.49497	2.25246	2.24282	2.12579	1.41734	1.99062	2.22716	2.77839	2.68451	1.89272	1.95511	1.75662	2.75941	1.81106	2.70563	1.67493	2.02267	0.665711	1.90491	2.09084	1.85857	1.3113	1.3531	0.734379	1.22676	0.360225	1.92793	1.91792	1.62817	1.38421	2.04926	2.59959	2.28007	0.797741	0.0449363	2.84858	2.24525
ppa_stranded_DN16622_c0_g1_i1	-1	-1	-1	0.877505	-0.970869	0.750007	0.468684	1.0334	1.85599	1.14914	2.94439	0.191943	-1	-0.146028	0.85078	0.720348	3.97416	1.58313	2.4502	1.00813	-0.0406241	0.424577	-0.0971914	0.657243	-0.410565	0.822292	0.974542	0.645754	1.41663	0.364998	0.336501	-0.231461	0.896933	-0.0767859	-1	1.50794	0.176406	0.391138
ppa_stranded_DN16638_c0_g1_i1	-1	3.36408	3.6159	1.41224	1.68738	1.60059	1.81055	1.41132	1.81041	1.35776	1.82761	1.23384	2.6733	2.29537	1.51674	2.60146	2.07565	2.53233	1.70184	1.76425	2.12763	1.62218	1.22592	1.86043	1.77524	1.99061	1.65191	1.95988	1.73134	2.32972	2.31969	2.09314	2.64691	2.70674	2.24139	3.50252	3.03234	3.14698
ppa_stranded_DN16647_c0_g1_i2	3.42691	3.68646	3.70864	2.28747	1.76222	1.36222	2.35579	2.38586	3.22198	3.37991	3.96562	1.69223	2.92972	2.33833	2.15644	1.50371	1.22445	2.12259	3.57528	3.34033	2.33279	1.68134	1.48991	1.69241	1.75247	1.52666	0.891501	1.45984	4.19095	1.52685	1.95889	2.25826	1.46003	2.33226	0.527081	0.405235	1.20281	0.992067
ppa_stranded_DN16650_c0_g1_i1	3.2793	2.47789	-0.254776	3.94393	3.87002	2.91567	2.73333	2.98398	3.035	3.23094	3.30875	3.39319	2.8289	4.26903	2.87	2.51261	3.38796	2.88486	2.98156	3.00157	2.89833	2.39925	3.64295	3.15264	2.06621	0.946985	1.77918	1.82455	3.91544	1.7228	3.2527	1.21668	1.96279	-0.494077	-1	0.849602	0.457612	0.910721
ppa_stranded_DN16652_c0_g1_i2	1.51078	-1	-1	2.34329	-1	-0.583971	1.21885	-0.522323	-1	6.47236	1.28476	0.255229	0.181632	-0.241649	0.107957	1.08756	0.097023	1.42181	-1	0.501791	0.749291	-0.103113	-1	0.671905	-1	-0.247987	-0.820801	-1	-0.387392	-1	0.182257	-1	0.283725	0.609717	-1	-1	-1	-1
ppa_stranded_DN16657_c0_g1_i1	1.08485	0.714744	-0.410781	0.590129	-0.00506307	0.154911	1.77173	3.21543	1.83093	3.76858	0.765922	-0.17688	0.443667	0.0797474	0.139592	1.26683	3.8949	4.96103	0.162845	0.372917	-0.546978	-0.0552955	-0.475547	1.07823	1.04227	4.21305	0.873957	0.941904	-0.512966	-1	-0.0554792	-1	-0.422584	-0.470537	0.886502	0.0664331	-0.712744	-0.737105
ppa_stranded_DN1667_c0_g1_i1	3.87515	4.61783	3.58836	4.74304	4.80376	3.49559	3.99208	4.20241	4.50818	4.22869	3.43923	3.71106	3.51923	4.54905	4.44947	3.69539	3.49453	3.85688	3.34303	3.19474	3.64529	3.37027	3.27666	4.24503	4.17885	4.08909	3.66008	4.66886	4.41314	4.76322	4.72136	4.86696	5.35403	4.69487	4.07917	4.02015	5.54763	5.69509
ppa_stranded_DN16675_c0_g2_i1	1.0648	-1	-1	-1	2.08118	0.62811	0.43555	0.692654	1.51094	0.99316	-1	1.37959	0.947713	1.84431	0.312176	0.394859	1.1041	0.633787	0.492974	0.941552	1.39565	1.06231	0.18293	-0.179668	-0.171975	0.553855	0.241853	0.165373	0.750495	-0.278451	0.0579104	0.0318134	0.148168	0.617129	-0.185664	-1	0.960282	0.210326
ppa_stranded_DN16687_c0_g1_i1	-1	-1	-1	-1	-1	-1	-1	-1	-1	-1	-1	-1	-1	-1	0.889365	-1	-1	-1	-1	-1	-1	-1	-1	-1	-1	-1	4.12105	1.94981	-0.132663	4.56332	2.36656	5.51333	4.51616	5.24098	3.95753	4.52433	2.72785	0.462474
ppa_stranded_DN16691_c0_g1_i1	1.58968	4.16041	4.48924	3.68959	3.79656	2.11224	1.70812	2.73244	2.15202	2.18808	2.21766	1.9027	2.14176	1.98403	2.8697	2.13192	1.1432	1.68224	1.61283	1.65077	1.8466	1.3832	0.621834	0.903385	0.411745	0.477706	0.100488	0.171672	0.705364	0.27126	0.180392	-0.0232226	0.310462	0.367711	0.140978	0.0485925	-0.157868	-0.570643
ppa_stranded_DN16696_c0_g2_i1	-0.134443	-1	-1	-1	-0.94295	-1	0.899148	-1	-1	-1	-1	-1	-1	-1	1.36036	-1	-1	-0.289371	-1	-1	-0.171998	-1	-1	-1	-0.672433	-1	-1	0.215291	-0.699625	0.761544	0.530527	2.43384	1.07073	0.141854	-0.0682659	0.585641	0.248943	-1
ppa_stranded_DN16701_c0_g1_i1	-1	-1	-1	-1	-1	-1	-1	-1	-1	-1	-1	-0.515327	-1	-1	-1	-1	-1	-1	-1	-1	-1	-1	-1	-1	-1	-1	2.48604	-1	-1	2.48881	3.48432	3.95494	4.05028	4.85851	3.60504	3.44361	2.70772	2.95215
ppa_stranded_DN16703_c0_g1_i1	2.77438	3.69252	3.03805	4.69925	4.26451	3.8057	3.69721	4.27373	4.96967	4.39246	4.11475	3.84139	3.67354	3.62107	3.6115	4.57848	4.17602	4.44909	3.32541	4.12204	4.30806	3.04211	3.66765	3.93421	4.03853	3.90485	3.25008	3.74466	3.52815	3.51273	3.68654	3.50931	4.09049	4.17423	3.3613	4.05403	4.71101	4.59669
ppa_stranded_DN16706_c0_g1_i1	1.92795	4.16342	-1	2.17372	0.87783	1.24324	2.12188	2.28893	3.01085	3.78228	1.59953	1.97113	2.1437	2.55742	2.48015	1.73858	1.1799	2.22089	0.774067	0.910564	1.70352	1.74649	0.301612	0.422576	0.0726856	0.190081	0.593111	1.96418	1.20689	1.2004	1.34301	0.463935	1.46811	2.16041	1.16755	-1	2.01693	1.78319
[truncated: 21,763 more rows]
