# Supplementary material for: Single worm transcriptomics identifies a developmental core network of oscillating genes with deep conservation across nematodes
Source: HighWire-hosted journal article supplement (doi:10.1101/gr.275303.121), 2021-07-22
Supplement: Supplemental_Table_S3.xlsx [file Supplemental_Table_S3.xlsx]

## Sheet: tb_feature_ppaOsc2964_swt05H.v3
Supplemental Table S3 2,964 oscillations in P. pacificus
ppa_locus	Mean_exp (log2(FPKM))	Amplitude (log2(FPKM))	Phase	Phase_class
Iso_D.1763.1	2.6282	2.74244	0	pc01
Iso_D.9741.2	2.14648	0.773741	0	pc01
PPA35659	3.98833	0.561631	0	pc01
PPA36620	3.75192	0.635273	0	pc01
Iso_D.11420.1	2.02848	1.55356	1	pc01
PPA40119	3.08811	0.540951	1	pc01
PPA40265	1.00346	1.12225	1	pc01
ppa_stranded_DN30694_c4_g2_i2	5.47472	0.545994	1	pc01
ppa_stranded_DN16572_c0_g1_i1	0.528056	0.953042	1	pc01
PPA40946	0.0467229	0.517874	1	pc01
PPA40958	5.89246	0.729051	1	pc01
PPA38627	4.66658	0.586941	1	pc01
ppa_stranded_DN30498_c0_g1_i6	4.16071	0.707692	1	pc01
PPA39390	3.53019	0.599271	1	pc01
PPA04180	0.235361	0.936058	1	pc01
ppa_stranded_DN30694_c0_g2_i1	2.61452	0.518494	1	pc01
PPA34246	6.41404	1.01784	1	pc01
PPA09627	5.293	1.53081	1	pc01
PPA00296	-0.0291438	1.35709	1	pc01
PPA35257	-0.206214	1.45909	1	pc01
PPA21762	2.65175	0.512439	1	pc01
ppa_stranded_DN31626_c1_g10_i3	5.54084	0.644849	2	pc01
PPA04304	1.02533	0.799991	2	pc01
PPA40163	3.62182	0.621001	2	pc01
PPA17137	-0.356177	1.13632	2	pc01
PPA16598	2.819	0.570069	2	pc01
PPA30846	7.0886	0.710167	2	pc01
PPA40849	-0.152565	0.634502	2	pc01
PPA22808	5.04281	0.540133	2	pc01
ppa_stranded_DN30943_c4_g4_i1	2.0454	0.934239	2	pc01
PPA02166	-0.388853	0.859579	2	pc01
PPA35400	0.512716	2.02847	2	pc01
ppa_stranded_DN23221_c0_g1_i2	4.11415	0.573199	2	pc01
PPA19221	0.275661	0.970414	2	pc01
ppa_stranded_DN31640_c2_g27_i6	5.31488	0.5154	2	pc01
PPA05890	0.392605	0.704386	2	pc01
ppa_stranded_DN17640_c0_g1_i1	4.54632	0.512169	2	pc01
ppa_stranded_DN28898_c1_g1_i5	1.78487	0.848859	2	pc01
ppa_stranded_DN16950_c1_g1_i1	2.76914	0.54666	3	pc01
ppa_stranded_DN18832_c0_g2_i1	4.74841	0.544009	3	pc01
ppa_stranded_DN21097_c0_g1_i1	3.10343	0.593953	3	pc01
Contig40-snapTAU.204	1.09525	0.820396	3	pc01
PPA02981	0.205422	1.218	3	pc01
PPA08026	0.470499	1.27235	3	pc01
ppa_stranded_DN27768_c0_g1_i5	2.61846	2.58316	3	pc01
PPA37832	3.95932	1.90323	3	pc01
ppa_stranded_DN25698_c0_g2_i1	3.34081	0.567987	3	pc01
PPA39721	0.301361	1.41887	3	pc01
PPA36893	1.45066	0.704137	3	pc01
PPA40827	1.00433	1.14474	4	pc01
ppa_stranded_DN18470_c0_g1_i1	4.25677	0.571319	4	pc01
PPA15143	1.42079	1.21147	4	pc01
ppa_stranded_DN30060_c0_g1_i2	2.77593	1.52116	4	pc01
ppa_stranded_DN31610_c0_g6_i1	4.99479	0.58788	4	pc01
PPA45088	4.92888	3.19192	4	pc01
ppa_stranded_DN13834_c0_g1_i1	1.33476	0.664852	4	pc01
PPA12041	1.49137	3.20415	4	pc01
PPA38622	7.86545	0.525858	4	pc01
PPA17225	1.08943	0.887429	4	pc01
ppa_stranded_DN31747_c0_g1_i1	4.52204	0.536763	4	pc01
PPA14145	1.90559	0.905321	4	pc01
PPA01021	0.355008	1.59231	4	pc01
ppa_stranded_DN22978_c1_g1_i2	3.91306	0.502925	4	pc01
PPA40267	4.18589	0.782599	4	pc01
ppa_stranded_DN31172_c0_g1_i4	-0.403533	0.525287	4	pc01
PPA25521	4.25698	0.576017	4	pc01
ppa_stranded_DN29807_c0_g1_i1	4.76169	0.515146	5	pc01
PPA03851	0.252864	0.771112	5	pc01
PPA40408	2.61351	0.643357	5	pc01
PPA43249	5.46134	0.91162	5	pc01
PPA20636	3.9452	1.88269	5	pc01
ppa_stranded_DN30344_c1_g3_i9	3.4277	0.697421	5	pc01
ppa_stranded_DN31309_c1_g2_i1	3.39818	0.657165	5	pc01
PPA36088	0.833071	0.854148	5	pc01
PPA39921	0.666084	0.533321	5	pc01
PPA21572	0.184256	0.998803	5	pc01
PPA39878	0.231301	1.59343	5	pc01
PPA41350	3.57553	0.576333	5	pc01
ppa_stranded_DN26700_c0_g2_i2	0.19467	1.13707	5	pc01
ppa_stranded_DN31560_c5_g1_i1	3.38495	0.95978	6	pc01
PPA40476	5.22002	1.07823	6	pc01
ppa_stranded_DN18064_c0_g2_i1	6.03839	0.589324	6	pc01
PPA34603	-0.342916	1.15791	6	pc01
PPA40811	2.66747	1.51282	6	pc01
PPA15693	1.27809	0.534077	6	pc01
PPA38591	6.61825	0.521792	6	pc01
PPA39615	-0.359349	0.788299	6	pc01
ppa_stranded_DN23842_c0_g1_i1	2.25584	1.13265	6	pc01
PPA19565	1.55113	0.8243	6	pc01
PPA40333	1.95922	0.537403	6	pc01
ppa_stranded_DN24225_c0_g1_i2	4.27782	0.597726	6	pc01
ppa_stranded_DN24416_c0_g1_i2	4.41571	0.571445	6	pc01
PPA27311	1.95329	0.542415	6	pc01
PPA28786	3.06852	0.669112	6	pc01
PPA16913	0.607858	1.08533	6	pc01
PPA30142	3.86293	1.15357	6	pc01
PPA14047	2.67136	1.42894	7	pc01
PPA02683	1.5088	3.43658	7	pc01
ppa_stranded_DN39718_c0_g1_i1	1.03424	0.617781	7	pc01
PPA19763	4.2817	1.41106	7	pc01
ppa_stranded_DN23957_c0_g1_i5	3.47441	0.510219	7	pc01
PPA06050	0.58593	1.16914	7	pc01
PPA36646	0.477473	0.653732	7	pc01
PPA13364	2.07336	1.87767	7	pc01
PPA01946	-0.274833	0.837139	7	pc01
ppa_stranded_DN31092_c1_g6_i1	4.77939	0.582936	7	pc01
ppa_stranded_DN27091_c0_g1_i1	0.486435	0.789721	7	pc01
ppa_stranded_DN29577_c0_g2_i2	4.74399	0.599347	7	pc01
PPA38441	3.25859	0.698411	7	pc01
PPA46440	2.02704	0.925416	7	pc01
ppa_stranded_DN31292_c0_g1_i2	5.03501	0.539174	7	pc01
PPA16668	0.189219	0.50628	8	pc01
PPA04138	2.1028	0.615643	8	pc01
ppa_stranded_DN24812_c0_g2_i1	-0.159158	1.23239	8	pc01
PPA35582	2.07426	1.05534	8	pc01
PPA07664	1.68746	0.775927	8	pc01
PPA32901	4.58953	0.599241	8	pc01
Contig10-snapTAU.136	0.820169	0.659969	8	pc01
PPA16819	2.54375	0.886913	8	pc01
PPA19920	5.30592	0.679538	9	pc01
PPA35301	0.216108	0.83356	9	pc01
ppa_stranded_DN27661_c0_g1_i3	3.82297	0.591164	9	pc01
PPA11389	2.92772	0.659779	9	pc01
PPA45077	0.219289	0.597449	9	pc01
ppa_stranded_DN30207_c2_g3_i1	3.71561	0.72274	9	pc01
PPA29510	3.90176	0.618582	9	pc01
PPA30582	-0.486655	0.533824	9	pc01
PPA01881	2.47517	2.24017	9	pc01
PPA16109	5.52729	2.63686	9	pc01
Iso_D.14050.1	1.16862	0.72848	9	pc01
ppa_stranded_DN31590_c1_g26_i1	3.11824	2.77575	9	pc01
ppa_stranded_DN24580_c0_g2_i1	2.57195	0.553202	9	pc01
PPA28572	1.54618	0.985486	9	pc01
PPA08808	0.638797	0.618513	9	pc01
PPA38516	0.346384	1.48135	9	pc01
ppa_stranded_DN20231_c0_g1_i2	-0.475187	0.666413	9	pc01
PPA14347	3.47448	0.751961	10	pc01
ppa_stranded_DN29403_c1_g1_i4	0.318715	0.656447	10	pc01
PPA31238	1.61674	0.684976	10	pc01
PPA38613	4.14148	0.57805	10	pc01
PPA34101	2.18179	0.727314	10	pc01
PPA28724	2.65255	0.98784	10	pc01
ppa_stranded_DN31074_c0_g1_i1	1.93021	0.580551	10	pc01
ppa_stranded_DN16276_c0_g1_i1	3.51957	1.5553	10	pc01
ppa_stranded_DN29587_c1_g1_i1	2.09142	1.53761	10	pc01
PPA11326	6.34105	0.617387	10	pc01
ppa_stranded_DN28825_c0_g2_i1	-0.0265296	1.32042	10	pc01
ppa_stranded_DN23686_c0_g3_i1	0.987671	1.90147	10	pc01
ppa_stranded_DN32008_c0_g1_i1	4.23985	0.693201	10	pc01
PPA40709	0.988898	0.519286	10	pc01
PPA23297	0.0567676	0.735959	10	pc01
PPA18200	-0.1205	1.19704	10	pc01
ppa_stranded_DN30135_c0_g1_i2	4.59092	0.50583	11	pc01
ppa_stranded_DN27457_c0_g1_i2	4.16876	0.517556	11	pc01
PPA34244	5.43104	1.22154	11	pc01
PPA39898	-0.154028	0.687288	11	pc01
PPA24537	2.9577	0.960636	11	pc01
PPA37801	1.13173	0.516354	11	pc01
PPA25010	0.933131	0.514068	11	pc01
PPA38495	3.00401	0.91004	11	pc01
PPA22004	0.974569	0.597515	11	pc01
ppa_stranded_DN28189_c0_g1_i4	1.65268	2.31714	11	pc01
ppa_stranded_DN31143_c2_g1_i2	5.41334	0.528844	11	pc01
ppa_stranded_DN15579_c0_g1_i1	4.15634	0.584082	11	pc01
ppa_stranded_DN36319_c0_g1_i1	4.51609	0.558803	12	pc01
PPA21867	2.96134	1.62109	12	pc01
ppa_stranded_DN31595_c3_g1_i3	4.46009	0.569238	12	pc01
PPA33476	0.994486	2.77939	12	pc01
ppa_stranded_DN30199_c3_g1_i6	0.962868	2.20779	12	pc01
PPA33143	1.10035	1.52673	12	pc01
ppa_stranded_DN22988_c0_g1_i1	5.94146	0.809342	12	pc01
PPA41062	5.43109	0.515378	12	pc01
ppa_stranded_DN29326_c0_g2_i2	0.743133	0.732674	13	pc01
PPA08513	0.301157	1.18789	13	pc01
PPA21641	0.729736	1.03274	13	pc01
PPA03824	0.478987	0.816794	13	pc01
PPA40518	8.031	2.94321	13	pc01
ppa_stranded_DN26743_c0_g2_i1	4.35575	0.504433	13	pc01
PPA36984	5.99008	0.780886	13	pc01
ppa_stranded_DN30276_c5_g13_i1	3.39576	0.552008	13	pc01
PPA34720	4.11369	1.04538	13	pc01
PPA46100	5.0149	1.49094	13	pc01
ppa_stranded_DN26955_c0_g2_i2	7.10372	0.541235	13	pc01
PPA40269	4.87192	0.505285	13	pc01
PPA08264	2.4617	0.502828	13	pc01
ppa_stranded_DN15601_c0_g1_i1	8.62913	0.599728	13	pc01
PPA43285	7.97511	0.692877	14	pc01
PPA36683	0.135237	1.09061	14	pc01
PPA43335	1.41011	0.838497	14	pc01
PPA44435	-0.169747	0.680545	14	pc01
PPA00333	-0.137824	0.811056	14	pc01
PPA44459	0.533256	0.86481	14	pc01
PPA03509	2.21071	3.1818	14	pc01
ppa_stranded_DN20313_c0_g1_i1	-0.266518	0.79872	14	pc01
PPA04576	1.12517	0.840032	14	pc01
PPA38434	3.90173	0.58579	14	pc01
PPA11291	5.93821	0.629563	14	pc01
isototal.3464.2	4.89948	0.526881	14	pc01
PPA12917	1.48593	1.00338	14	pc01
ppa_stranded_DN29393_c0_g1_i1	0.743627	0.909077	14	pc01
ppa_stranded_DN30515_c0_g2_i2	0.692535	0.710335	14	pc01
PPA06081	4.39313	0.734051	15	pc01
ppa_stranded_DN12997_c0_g2_i1	2.25591	0.771038	15	pc01
PPA41378	5.75558	2.61888	15	pc01
ppa_stranded_DN26280_c0_g3_i1	3.82609	0.646833	15	pc01
PPA23883	0.962091	1.72213	15	pc01
PPA12872	5.10773	0.57655	15	pc01
PPA36842	3.83653	1.32908	15	pc01
PPA15101	-0.766617	0.508254	15	pc01
ppa_stranded_DN20288_c0_g3_i1	1.79497	1.17621	15	pc01
PPA01238	-0.000897682	1.62833	15	pc01
PPA26632	5.47212	0.836593	15	pc01
ppa_stranded_DN26832_c0_g1_i1	1.4466	2.71181	16	pc01
PPA33425	4.28267	0.60979	16	pc01
PPA45466	5.4193	0.516807	16	pc01
PPA16153	2.13057	0.894682	16	pc01
ppa_stranded_DN30393_c0_g1_i4	2.30448	0.569702	16	pc01
PPA25282	4.35069	2.34592	16	pc01
PPA21784	1.63219	0.587722	16	pc01
ppa_stranded_DN6364_c0_g2_i1	0.409593	0.562408	16	pc01
PPA39857	1.04987	0.595734	16	pc01
PPA30034	2.10779	2.34235	16	pc01
PPA39075	2.80914	0.559486	16	pc01
PPA41606	10.1672	3.55432	16	pc01
PPA06077	1.2054	0.752836	16	pc01
PPA20343	3.67917	0.616403	16	pc01
PPA22394	-0.405574	0.779516	16	pc01
ppa_stranded_DN28325_c0_g2_i1	2.14236	0.98577	16	pc01
PPA18545	0.251711	1.39256	16	pc01
PPA15526	0.810658	0.659185	16	pc01
PPA12151	4.02345	0.594026	17	pc01
PPA39237	1.18433	0.736527	17	pc01
PPA01688	2.30185	0.976345	17	pc01
PPA34818	4.27628	0.595623	17	pc01
ppa_stranded_DN28675_c0_g1_i2	6.66927	0.990122	17	pc01
PPA37915	0.387585	0.714597	17	pc01
PPA10963	0.538311	1.96028	17	pc01
PPA17203	0.668277	1.04984	17	pc01
Contig67-snapTAU.71	1.45937	0.502745	17	pc01
PPA12505	-0.269651	1.0863	17	pc01
ppa_stranded_DN28697_c2_g3_i1	1.59184	0.578599	17	pc01
PPA36381	2.69295	1.66901	17	pc01
PPA38633	3.16608	0.575715	17	pc01
PPA18074	2.43369	0.881777	17	pc01
PPA30306	4.02044	1.36922	17	pc01
PPA15358	5.08375	0.625281	17	pc01
PPA13859	2.55741	0.57903	18	pc01
PPA38998	2.69165	1.68367	18	pc01
ppa_stranded_DN17664_c0_g1_i1	1.47053	2.46354	18	pc01
Contig18-snapTAU.45	2.55553	0.718674	18	pc01
ppa_stranded_DN24113_c0_g3_i1	2.69052	0.957509	18	pc01
PPA04875	1.61767	3.02308	18	pc01
ppa_stranded_DN32724_c0_g1_i1	5.4513	0.667992	18	pc01
PPA16877	1.92229	0.527459	18	pc01
PPA44689	4.25559	0.537123	18	pc01
Contig2-snapTAU.243	0.600887	0.527089	18	pc01
PPA23737	3.27493	0.562454	18	pc01
PPA05667	2.21622	0.802669	18	pc01
PPA11573	-0.0689941	0.911752	18	pc01
PPA43424	5.28132	0.749092	18	pc01
ppa_stranded_DN26449_c0_g1_i2	3.40913	0.735816	18	pc01
PPA39809	1.75517	2.49988	18	pc01
PPA03108	4.01886	0.805292	18	pc01
PPA30653	1.06954	0.725168	18	pc01
PPA43949	4.64194	1.72178	18	pc01
ppa_stranded_DN9207_c0_g1_i1	2.27396	0.500823	18	pc01
PPA14247	0.770061	0.793084	19	pc01
ppa_stranded_DN25761_c0_g1_i1	2.44863	1.5148	19	pc01
PPA39421	3.38257	0.703208	19	pc01
PPA42856	0.242233	0.909479	19	pc01
ppa_stranded_DN30374_c0_g1_i5	1.43019	1.0098	19	pc01
PPA06126	0.825799	1.09281	19	pc01
ppa_stranded_DN30353_c1_g1_i5	4.50039	0.531543	19	pc01
PPA44573	3.82371	0.547113	19	pc01
ppa_stranded_DN20323_c0_g1_i2	3.30405	0.719276	19	pc01
PPA39707	-0.095425	0.869166	19	pc01
PPA18164	1.14524	0.845467	20	pc01
ppa_stranded_DN27422_c0_g1_i3	1.02299	1.0241	20	pc01
ppa_stranded_DN29951_c0_g3_i5	3.44204	0.713227	20	pc01
PPA32323	4.615	0.730032	20	pc01
ppa_stranded_DN20079_c0_g1_i1	1.51687	0.660375	20	pc01
PPA05357	0.781623	1.46285	20	pc01
ppa_stranded_DN26253_c0_g1_i1	0.292	0.604548	20	pc01
ppa_stranded_DN23047_c0_g1_i2	2.61657	3.21873	20	pc01
ppa_stranded_DN23592_c0_g1_i1	1.81591	2.84094	20	pc01
ppa_stranded_DN2881_c0_g1_i1	0.55434	1.39298	20	pc01
isopolya.3147.1	5.55898	0.562723	20	pc01
PPA03175	2.1894	0.763392	20	pc01
PPA22922	-0.531339	0.57532	20	pc01
PPA11330	1.50227	1.11573	20	pc01
PPA19734	3.9603	0.510238	20	pc01
ppa_stranded_DN31686_c2_g2_i5	5.03936	0.503217	20	pc01
PPA08770	0.292768	1.9322	20	pc01
ppa_stranded_DN29604_c1_g1_i1	4.70046	0.549501	21	pc01
PPA41722	-0.304772	0.582937	21	pc01
PPA04213	0.50791	2.2033	21	pc01
PPA39449	2.29546	3.53185	21	pc01
PPA17233	5.35207	0.518293	21	pc01
ppa_stranded_DN23720_c0_g1_i2	0.530766	0.600258	21	pc01
Iso_D.9769.1	2.66501	0.516708	21	pc01
ppa_stranded_DN28891_c0_g2_i1	1.20152	0.78034	21	pc01
Contig197-snapTAU.5	5.21489	0.542993	21	pc01
PPA40600	1.21012	0.514373	21	pc01
PPA40640	-0.445216	1.05219	21	pc01
PPA17392	2.33454	0.538981	21	pc01
PPA18697	-0.127319	0.819782	21	pc01
PPA40691	6.88107	2.42372	21	pc01
ppa_stranded_DN30710_c0_g1_i8	2.00998	1.53727	22	pc01
PPA27189	0.0431739	0.593018	22	pc01
PPA04141	4.1429	0.614884	22	pc01
ppa_stranded_DN26615_c1_g1_i2	0.925676	1.0499	22	pc01
PPA21883	0.883979	0.985658	22	pc01
PPA01892	5.54385	0.505773	22	pc01
ppa_stranded_DN27493_c0_g1_i1	-0.261206	0.624953	22	pc01
ppa_stranded_DN28338_c1_g2_i3	3.52686	0.614962	22	pc01
PPA05184	3.31541	0.707276	22	pc01
ppa_stranded_DN23941_c1_g4_i1	7.15862	0.640582	22	pc01
ppa_stranded_DN31419_c0_g3_i2	2.09072	1.0909	22	pc01
PPA34286	0.535134	1.05332	22	pc01
PPA39655	1.19244	0.631965	22	pc01
ppa_stranded_DN23302_c0_g1_i1	2.41724	1.07237	22	pc01
PPA14016	1.18046	0.770826	22	pc01
PPA21293	1.26527	0.71166	23	pc01
PPA05088	0.612588	1.1117	23	pc01
PPA08719	3.23361	0.84741	23	pc01
PPA32231	1.22903	0.551413	23	pc01
PPA11574	1.17844	0.753458	23	pc01
PPA02388	0.316306	0.525423	23	pc01
ppa_stranded_DN31000_c1_g1_i1	3.9926	0.774415	23	pc01
PPA11663	0.868778	1.0684	23	pc01
Iso_D.5261.1	4.27099	0.547893	23	pc01
ppa_stranded_DN29662_c0_g1_i6	3.14189	0.653277	23	pc01
PPA25529	1.84725	0.906352	23	pc01
ppa_stranded_DN30473_c0_g1_i1	2.59498	0.713974	23	pc01
PPA28359	2.79767	0.873719	23	pc01
PPA38787	7.06847	2.43393	23	pc01
PPA42214	3.34306	1.84976	23	pc01
PPA26611	0.0525335	0.608912	23	pc01
PPA35052	5.33517	1.12486	24	pc01
PPA22745	6.47557	0.528843	24	pc01
PPA36848	0.738201	1.86505	24	pc01
ppa_stranded_DN27581_c0_g2_i1	4.14449	0.737404	24	pc01
PPA45819	2.57376	1.07337	24	pc01
PPA35935	1.57608	0.722437	24	pc01
PPA08232	2.55141	1.03713	24	pc01
UMM-S2838-17.63-mRNA-1_truncated_curated	-0.319722	0.836836	24	pc01
ppa_stranded_DN18104_c0_g1_i1	3.31454	2.27549	24	pc01
PPA43478	0.161594	1.2112	24	pc01
PPA12646	0.589265	0.71837	24	pc01
ppa_stranded_DN26237_c0_g3_i1	3.00607	0.534236	24	pc01
PPA40044	5.38591	0.883393	24	pc01
PPA38176	-0.557946	0.696457	24	pc01
ppa_stranded_DN23945_c0_g2_i1	2.07144	0.537612	24	pc01
PPA35863	0.727693	0.876414	24	pc01
PPA18765	1.22681	1.01976	24	pc01
PPA39966	5.43743	0.694728	25	pc01
ppa_stranded_DN14206_c0_g1_i1	3.27067	2.11123	25	pc01
PPA03600	5.07913	1.55748	25	pc01
PPA24196	2.8712	1.20626	25	pc01
PPA41757	0.543239	2.39983	25	pc01
ppa_stranded_DN17179_c0_g1_i1	2.34741	3.07106	25	pc01
PPA28211	1.58611	0.867133	25	pc01
ppa_stranded_DN50236_c0_g1_i1	1.07524	1.46313	25	pc01
PPA31994	6.51197	0.926603	25	pc01
ppa_stranded_DN23211_c0_g1_i1	3.41535	0.517077	26	pc01
PPA15993	1.6767	1.12854	26	pc01
PPA21677	4.34733	4.13273	26	pc01
PPA03495	0.205993	1.06777	26	pc01
PPA22819	1.70896	0.920642	26	pc01
ppa_stranded_DN21420_c0_g1_i1	-0.404261	1.03439	26	pc01
PPA26996	-0.421072	0.599255	26	pc01
PPA45365	1.94103	0.974972	26	pc01
PPA25125	3.06011	1.51728	26	pc01
PPA45076	1.204	2.25075	27	pc01
PPA37857	2.52509	0.551152	27	pc01
PPA07209	4.73639	0.651161	27	pc01
PPA11382	1.00139	0.70973	27	pc01
PPA34328	0.549504	1.32572	27	pc01
PPA18144	-0.402789	0.719471	27	pc01
PPA39084	-0.00723411	1.01124	27	pc01
ppa_stranded_DN30184_c0_g1_i2	0.60683	1.02651	27	pc01
PPA20590	-0.11771	0.637753	27	pc01
ppa_stranded_DN15720_c0_g1_i1	2.5674	0.51833	27	pc01
PPA22851	3.35201	1.34137	27	pc01
PPA09255	4.37065	0.547546	27	pc01
PPA05918	0.20467	0.546974	27	pc01
PPA36324	0.647605	0.876669	27	pc01
Iso_D.10021.3	2.6854	0.643606	27	pc01
PPA39691	4.3886	0.535179	27	pc01
PPA04755	-0.235873	0.782568	27	pc01
PPA02830	1.5901	0.518735	28	pc01
ppa_stranded_DN24220_c0_g1_i1	2.23832	1.26558	28	pc01
ppa_stranded_DN31545_c0_g2_i6	-0.136423	0.878561	28	pc01
PPA35672	-0.0570288	0.507079	28	pc01
PPA44677	1.28614	1.52845	28	pc01
PPA01023	3.48477	1.33333	28	pc01
PPA41257	0.133808	1.25339	28	pc01
PPA00464	3.01646	1.58225	28	pc01
PPA27319	0.613874	0.568035	28	pc01
PPA38932	-0.206446	0.566234	28	pc01
Iso_D.10064.1_curated	1.30217	0.879072	28	pc01
PPA23730	0.929954	0.974441	28	pc01
PPA40602	2.93985	0.530119	29	pc01
ppa_stranded_DN23537_c0_g1_i2	0.351118	0.732864	29	pc01
PPA04558	4.14776	2.4975	29	pc01
PPA40144	3.33728	0.707792	29	pc01
PPA03479	0.600295	0.885217	29	pc01
PPA15536	-0.2661	0.535686	29	pc01
Contig14-snapTAU.488	-0.296598	1.03724	29	pc01
PPA40684	0.823514	1.77204	29	pc01
ppa_stranded_DN31223_c0_g2_i1	3.46717	0.653188	29	pc01
PPA00658	4.63768	1.42114	29	pc01
PPA00497	0.973848	0.926437	29	pc01
ppa_stranded_DN29090_c1_g1_i2	3.79635	0.503729	29	pc01
PPA26769	1.26554	0.811709	30	pc02
PPA17926	2.48688	0.500276	30	pc02
Iso_D.4803.1	6.21581	1.35825	30	pc02
PPA10827	4.63183	3.69794	30	pc02
ppa_stranded_DN20881_c0_g1_i2	2.01654	1.45027	30	pc02
PPA25431	5.17041	0.50102	30	pc02
Iso_D.14461.1	3.58076	0.53314	30	pc02
PPA38133	1.25473	1.48735	30	pc02
PPA33321	1.0302	0.5367	30	pc02
ppa_stranded_DN25570_c1_g1_i1	2.39582	1.28946	30	pc02
PPA18166	2.54242	3.53601	30	pc02
PPA00310	7.42168	2.51028	30	pc02
ppa_stranded_DN21714_c0_g2_i2	2.3341	0.739798	30	pc02
PPA33360	1.90432	1.43338	31	pc02
PPA17055	5.2469	0.50713	31	pc02
ppa_stranded_DN29603_c0_g1_i1	0.739119	0.610733	31	pc02
ppa_stranded_DN6436_c0_g2_i1	3.78145	1.61722	31	pc02
PPA14126	3.44391	1.55863	31	pc02
PPA15572	5.77856	1.28181	31	pc02
UMM-S2838-35.56-mRNA-1_UTR_reannotated	2.22481	0.91459	31	pc02
ppa_stranded_DN26537_c0_g2_i1	1.87497	0.521823	31	pc02
PPA14172	4.02525	1.95433	31	pc02
ppa_stranded_DN31044_c0_g3_i13	2.66063	1.07335	32	pc02
ppa_stranded_DN27985_c0_g1_i5	1.83035	0.699119	32	pc02
PPA01947	3.73754	1.53291	32	pc02
PPA39756	1.51723	2.12652	32	pc02
PPA36967	6.26337	2.01583	32	pc02
PPA45938	1.64849	0.73669	32	pc02
ppa_stranded_DN28561_c0_g1_i1	0.482181	1.3056	32	pc02
PPA42848	0.0571526	0.741322	32	pc02
PPA34610	5.11506	2.42734	32	pc02
PPA24850	1.89506	0.607563	32	pc02
ppa_stranded_DN21146_c0_g1_i1	1.92415	0.589031	33	pc02
ppa_stranded_DN16547_c0_g1_i1	2.98931	0.554297	33	pc02
ppa_stranded_DN16773_c0_g1_i1	4.80433	0.63508	33	pc02
PPA30229	0.620297	1.60351	33	pc02
Contig65-snapTAU.1	4.71489	0.615858	33	pc02
PPA06720	3.8115	0.506374	33	pc02
ppa_stranded_DN21994_c0_g1_i1	-0.0279858	0.604404	33	pc02
ppa_stranded_DN26427_c0_g1_i1	1.22392	1.22186	33	pc02
PPA38143	1.92853	2.87937	34	pc02
PPA34716	0.863084	0.530327	34	pc02
PPA39881	0.31978	1.03621	34	pc02
ppa_stranded_DN28912_c0_g1_i1	2.65617	0.565636	34	pc02
PPA02445	4.19718	0.568046	34	pc02
PPA17184	1.06952	0.743383	34	pc02
PPA22148	-0.280097	0.993813	34	pc02
PPA12678	2.84542	4.30449	34	pc02
ppa_stranded_DN17327_c0_g1_i1	4.71982	1.56612	35	pc02
PPA36794	-0.0476067	0.623064	35	pc02
PPA19574	0.992572	1.1941	35	pc02
ppa_stranded_DN30428_c1_g1_i11	3.44139	0.578559	35	pc02
PPA33941	1.3582	0.936159	35	pc02
PPA00907	1.51423	0.864083	35	pc02
PPA44932	0.758507	0.75761	35	pc02
ppa_stranded_DN25549_c1_g2_i1	2.28225	0.743929	35	pc02
ppa_stranded_DN26406_c0_g2_i2	0.494047	1.19834	35	pc02
PPA35715	6.08664	0.584684	35	pc02
PPA40015	0.665488	1.28952	35	pc02
PPA45330	0.36182	0.841922	35	pc02
PPA21023	0.546831	1.02815	36	pc02
ppa_stranded_DN24787_c0_g2_i1	6.19021	0.850718	36	pc02
PPA01559	1.45464	0.527127	36	pc02
PPA39783	1.3362	1.98239	36	pc02
ppa_stranded_DN29917_c0_g1_i2	1.67971	0.604178	36	pc02
PPA37710	-0.216925	1.15639	36	pc02
PPA24384	2.77534	0.532417	36	pc02
PPA40740	1.54691	0.551113	37	pc02
PPA08730	-0.0658018	0.896554	37	pc02
PPA33038	0.647436	2.66889	37	pc02
PPA38308	-0.330523	0.547761	37	pc02
seq8	6.52683	0.515942	37	pc02
ppa_stranded_DN19359_c0_g1_i1	2.56541	3.01905	37	pc02
PPA26559	0.843279	0.658022	37	pc02
ppa_stranded_DN26831_c0_g1_i1	2.44883	0.553285	37	pc02
PPA08573	2.01496	0.614181	37	pc02
PPA08488	2.43551	1.02569	37	pc02
ppa_stranded_DN33078_c0_g1_i1	0.0213108	0.535014	38	pc02
PPA38778	-0.31077	0.519006	38	pc02
PPA39479	-0.407133	0.807465	38	pc02
PPA33931	5.19518	3.33133	38	pc02
ppa_stranded_DN31633_c2_g4_i1	0.80905	0.51605	38	pc02
PPA14092	2.11955	1.38751	38	pc02
ppa_stranded_DN36465_c0_g1_i1	4.80918	0.569253	38	pc02
ppa_stranded_DN28320_c0_g2_i2	-0.123633	0.508986	38	pc02
Contig11-snapTAU.554	2.36411	0.598263	38	pc02
PPA34344	0.081961	1.5657	39	pc02
UMM-S71-15.91-mRNA-1_frag_2	-0.0969544	0.8978	39	pc02
PPA45232	2.89265	3.76862	39	pc02
ppa_stranded_DN24629_c0_g2_i3	1.44361	0.956153	39	pc02
PPA25785	1.17996	1.28349	39	pc02
ppa_stranded_DN30570_c3_g10_i1	1.18832	0.744362	39	pc02
PPA22710	5.43549	0.938475	39	pc02
ppa_stranded_DN20778_c0_g1_i2	0.170507	0.729598	39	pc02
PPA46053	0.904861	0.530628	40	pc02
PPA03183	0.966844	0.604241	40	pc02
ppa_stranded_DN30400_c0_g1_i5	2.64362	0.659308	40	pc02
PPA38567	4.18815	0.600065	40	pc02
PPA06468	2.62516	0.612038	40	pc02
isopolya.2050.1	1.83218	2.41774	40	pc02
ppa_stranded_DN30993_c5_g6_i2	0.544126	0.689935	40	pc02
PPA39877	0.612718	0.610533	40	pc02
PPA05869	0.412256	0.710297	41	pc02
PPA36507	-0.481279	0.620868	41	pc02
ppa_stranded_DN31454_c7_g3_i3	1.52678	1.01719	41	pc02
PPA11375	4.76314	0.711504	41	pc02
ppa_stranded_DN8968_c0_g1_i1	5.32681	0.608565	41	pc02
ppa_stranded_DN20867_c0_g1_i1	0.157539	0.942458	41	pc02
PPA33590	5.95899	3.0817	41	pc02
ppa_stranded_DN21582_c0_g1_i1	3.68531	0.832079	41	pc02
ppa_stranded_DN27951_c0_g1_i1	1.26641	0.908887	41	pc02
PPA33150	0.432666	0.812222	41	pc02
PPA30704	7.41555	0.726248	41	pc02
PPA10259	3.25339	1.63035	42	pc02
PPA12503	1.71627	0.869431	42	pc02
PPA23831	2.22146	1.41623	42	pc02
PPA30177	2.09789	1.41873	42	pc02
PPA05087	6.05474	2.11838	42	pc02
ppa_stranded_DN30464_c0_g1_i2	3.23425	0.87909	42	pc02
PPA33588	6.40041	3.18319	42	pc02
ppa_stranded_DN8966_c0_g1_i1	-0.125281	0.899234	43	pc02
ppa_stranded_DN24664_c0_g1_i2	0.211411	1.18207	43	pc02
PPA25069	0.791212	0.829873	43	pc02
PPA36003	1.31285	0.573933	43	pc02
ppa_stranded_DN23167_c0_g4_i1	-0.696516	0.516333	43	pc02
PPA36968	7.98012	2.08501	43	pc02
ppa_stranded_DN26043_c0_g1_i2	3.24327	1.80905	44	pc02
PPA38976	1.84773	2.40023	44	pc02
PPA11881	1.20121	0.51569	44	pc02
ppa_stranded_DN23800_c0_g3_i1	1.32276	1.60615	44	pc02
PPA20122	4.33056	0.593679	44	pc02
PPA32287	0.10863	0.959256	44	pc02
Iso_D.14121.1	-0.583505	0.522755	44	pc02
PPA11463	0.144036	0.703691	44	pc02
PPA36123	0.541863	0.85706	45	pc02
PPA20390	2.31936	0.538977	45	pc02
ppa_stranded_DN19832_c0_g1_i1	4.16556	0.629056	45	pc02
ppa_stranded_DN29186_c1_g1_i3	2.18704	0.608254	45	pc02
PPA18770	1.59851	0.981304	45	pc02
PPA31448	4.13157	2.14771	45	pc02
PPA24448	2.03147	1.12736	45	pc02
PPA15905	0.604803	0.557116	46	pc02
PPA17292	2.35223	0.629654	46	pc02
PPA43121	1.97292	2.49009	46	pc02
PPA24398	0.497313	0.944603	46	pc02
ppa_stranded_DN24600_c0_g1_i1	0.45569	0.589984	46	pc02
PPA33487	0.889265	1.1944	47	pc02
PPA34812	0.334147	0.822819	47	pc02
Iso_D.14012.4	3.6187	0.597053	47	pc02
ppa_stranded_DN27450_c0_g2_i1	0.977659	0.724486	47	pc02
PPA28077	2.60172	0.683144	47	pc02
PPA02603	3.67023	0.647744	47	pc02
PPA04859	0.284078	1.26362	47	pc02
ppa_stranded_DN26608_c0_g1_i1	1.23144	1.51461	47	pc02
PPA00558	1.17061	0.59241	47	pc02
ppa_stranded_DN28210_c0_g1_i2	0.517352	0.76286	48	pc02
PPA39600	1.42555	1.1679	48	pc02
PPA25712	1.79018	1.25071	48	pc02
PPA18194	5.17518	2.57561	48	pc02
PPA22796	3.34346	0.679278	48	pc02
PPA28099	0.156243	0.903188	48	pc02
PPA35164	3.1699	0.554745	48	pc02
PPA23062	-0.314968	0.527931	48	pc02
ppa_stranded_DN24132_c0_g1_i1	2.34138	2.41456	48	pc02
ppa_stranded_DN31410_c3_g1_i2	1.7355	1.35288	49	pc02
PPA08677	6.24136	2.73794	49	pc02
ppa_stranded_DN21756_c0_g1_i1	1.75582	1.05486	49	pc02
Contig38-snapTAU.214	-0.375829	0.661016	49	pc02
PPA15425	3.32559	0.504018	49	pc02
PPA14495	1.58022	1.21113	49	pc02
PPA40290	-0.719223	0.559488	49	pc02
PPA19753	5.5037	0.588814	49	pc02
ppa_stranded_DN31152_c0_g2_i1	2.88147	0.52	50	pc02
PPA40685	4.04753	2.5754	50	pc02
PPA35880	-0.523073	0.594813	50	pc02
Contig26-snapTAU.120	1.08695	0.763548	50	pc02
PPA13957	8.48288	3.01863	50	pc02
ppa_stranded_DN24491_c0_g2_i2	1.55525	1.1833	50	pc02
PPA42572	-0.15869	0.841137	50	pc02
PPA23178	3.70648	2.56948	50	pc02
PPA36747	3.13762	1.6913	50	pc02
ppa_stranded_DN48492_c0_g1_i1	1.58226	0.531805	50	pc02
Iso_D.1590.1	2.66114	0.694579	51	pc02
PPA27698	0.638949	0.635949	51	pc02
ppa_stranded_DN31063_c0_g1_i10	0.364398	1.34161	51	pc02
ppa_stranded_DN24605_c0_g2_i3	0.617882	0.9023	51	pc02
Contig143-snapTAU.26	1.54322	0.780184	51	pc02
ppa_stranded_DN29436_c1_g1_i3	0.97402	1.17147	51	pc02
PPA45549	0.0891626	0.850672	51	pc02
PPA22503	2.45133	1.11796	51	pc02
PPA34180	2.59473	0.886303	52	pc02
ppa_stranded_DN15739_c0_g1_i1	1.52527	0.739966	52	pc02
PPA30684	1.18504	0.640918	52	pc02
ppa_stranded_DN7360_c0_g1_i1	3.91283	1.50255	52	pc02
ppa_stranded_DN31482_c0_g8_i1	4.13681	0.521169	52	pc02
PPA19470	3.04166	1.22022	52	pc02
PPA22116	1.93526	1.08618	53	pc02
PPA02457	3.26364	2.01287	53	pc02
PPA22353	1.95382	2.11661	53	pc02
PPA27186	2.05675	1.43736	53	pc02
ppa_stranded_DN19049_c0_g1_i1	4.23304	2.75604	53	pc02
PPA16111	3.029	1.81613	54	pc02
ppa_stranded_DN28186_c0_g1_i4	4.8445	0.724805	54	pc02
PPA05920	4.27082	1.18547	54	pc02
UMM-S469-1.44-mRNA-1_frag2	1.56847	0.722346	54	pc02
PPA37837	-0.125732	0.785776	54	pc02
PPA39268	1.03388	0.874127	54	pc02
PPA06078	1.50845	1.49985	54	pc02
ppa_stranded_DN31079_c0_g2_i1	4.52702	1.84306	55	pc02
ppa_stranded_DN22979_c1_g2_i2	4.39646	0.542324	55	pc02
ppa_stranded_DN31543_c0_g1_i1	0.180863	1.33599	55	pc02
PPA39814	2.89995	0.529928	55	pc02
PPA35851	1.48729	3.07635	55	pc02
PPA03244	6.25061	1.77359	55	pc02
PPA18868	2.47972	1.34664	55	pc02
PPA10664	0.193313	0.855959	55	pc02
ppa_stranded_DN22804_c0_g1_i2	-0.0982885	0.645732	55	pc02
PPA44172	2.42044	0.823352	56	pc02
ppa_stranded_DN31066_c0_g2_i1	5.06987	0.587935	56	pc02
ppa_stranded_DN31598_c1_g4_i2	2.68389	0.845856	56	pc02
Iso_D.13540.1	7.16881	2.25779	57	pc02
PPA00835	5.79584	1.8843	57	pc02
PPA30825	4.60073	1.59968	57	pc02
ppa_stranded_DN25931_c0_g1_i1	1.82444	1.47856	57	pc02
PPA15262	1.25988	0.599723	57	pc02
ppa_stranded_DN29628_c4_g2_i3	1.64572	0.719513	57	pc02
PPA34618	0.211974	0.951371	57	pc02
PPA09584	-0.415533	0.654824	57	pc02
PPA01495	0.381695	1.20623	57	pc02
PPA08448	1.602	0.952014	57	pc02
ppa_stranded_DN25212_c0_g2_i2	0.050188	1.12425	58	pc02
PPA22914	0.447643	0.868204	58	pc02
PPA05523	2.51408	1.3473	58	pc02
PPA23682	1.53182	1.18676	58	pc02
ppa_stranded_DN31455_c0_g1_i5	0.036523	0.623181	58	pc02
PPA25696	0.198618	0.579605	58	pc02
PPA29020	-0.464979	0.812076	58	pc02
PPA25950	1.09243	0.624651	58	pc02
PPA22154	1.15394	1.40833	59	pc02
PPA00786	-0.0476247	0.936632	59	pc02
ppa_stranded_DN25657_c0_g1_i3	4.35016	0.565138	59	pc02
PPA16241	3.11114	3.00895	59	pc02
ppa_stranded_DN29736_c0_g2_i4	2.01021	0.507376	59	pc02
PPA35661	0.280813	1.00857	59	pc02
PPA34423	-0.390343	0.971011	59	pc02
PPA22359	1.25844	1.17131	59	pc02
ppa_stranded_DN30570_c0_g2_i1	2.53884	0.535282	59	pc02
PPA19990	3.57679	0.627433	59	pc02
ppa_stranded_DN19075_c0_g1_i1	2.06707	0.552494	59	pc02
PPA20648	2.22304	1.24619	60	pc03
Iso_D.10899.2	4.8219	1.36984	60	pc03
PPA20373	0.640951	0.565881	60	pc03
PPA06524	2.42646	0.602711	60	pc03
PPA38436	-0.0515061	0.774218	60	pc03
PPA11112	5.59698	1.06363	60	pc03
PPA36679	1.09821	0.727317	60	pc03
PPA05187	2.91884	0.780636	61	pc03
PPA38690	1.87786	0.757136	61	pc03
PPA45387	3.04168	0.950339	61	pc03
ppa_stranded_DN16383_c0_g1_i1	2.09923	0.757645	61	pc03
PPA39114	7.49872	1.79699	61	pc03
PPA37109	0.558878	0.66703	61	pc03
PPA36097	3.78885	0.7158	61	pc03
PPA37940	2.93724	2.15649	62	pc03
PPA45329	2.39994	1.86498	62	pc03
ppa_stranded_DN29823_c0_g1_i3	1.51008	0.777707	62	pc03
PPA29290	2.4339	1.49212	62	pc03
ppa_stranded_DN19527_c0_g2_i1	5.51617	0.513527	62	pc03
Iso_D.6160.1	4.44	0.629101	62	pc03
PPA05772	8.39732	2.42118	62	pc03
Contig83-snapTAU.67	0.717822	1.05007	62	pc03
PPA20060	6.01229	2.97771	63	pc03
PPA41166	0.106542	0.834758	63	pc03
ppa_stranded_DN21636_c0_g3_i1	3.86304	0.515017	63	pc03
ppa_stranded_DN18660_c0_g1_i1	-0.276917	1.149	63	pc03
PPA40369	-0.102264	0.887987	63	pc03
PPA41086	0.348044	0.854976	64	pc03
PPA17153	2.56347	0.510373	64	pc03
PPA15377	1.44318	1.01618	64	pc03
PPA39538	-0.0863475	0.925012	64	pc03
PPA09889	5.94834	2.47125	64	pc03
PPA34895	1.05452	0.603954	64	pc03
UMM-S2838-27.35-mRNA-3_curated	1.49082	0.936256	65	pc03
PPA36237	2.8008	3.47587	65	pc03
PPA07167	-0.438311	0.557026	65	pc03
Contig50-snapTAU.70	0.826073	0.711662	66	pc03
ppa_stranded_DN24132_c1_g1_i1	-0.0582977	1.01231	66	pc03
ppa_stranded_DN30468_c0_g1_i1	2.88892	0.510053	66	pc03
UMM-S13-9.39-mRNA-1_frag_1	1.23897	1.13852	66	pc03
PPA40848	1.17577	0.559044	67	pc03
ppa_stranded_DN17644_c0_g1_i1	0.28537	1.03592	67	pc03
PPA38734	10.2149	0.629927	68	pc03
PPA11126	-0.0177013	0.812291	68	pc03
ppa_stranded_DN30516_c1_g2_i1	1.6832	0.594065	69	pc03
PPA35539	1.03316	1.16042	69	pc03
PPA36929	0.201633	0.654888	69	pc03
ppa_stranded_DN16571_c0_g1_i1	1.59339	2.05546	70	pc03
PPA40752	0.816054	1.49357	70	pc03
PPA11638	-0.265368	0.582152	70	pc03
PPA05773	1.10315	0.700697	70	pc03
PPA38923	0.350824	0.62019	70	pc03
ppa_stranded_DN27686_c0_g2_i1	3.70637	0.524709	71	pc03
PPA19690	0.276042	0.552111	71	pc03
PPA27859	1.01218	0.757161	71	pc03
PPA06025	1.85103	0.726809	71	pc03
PPA42913	6.95548	2.29387	71	pc03
PPA41811	2.79649	1.82777	72	pc03
ppa_stranded_DN23228_c0_g1_i1	1.16592	0.609208	72	pc03
PPA20356	-0.210917	1.14486	72	pc03
PPA45693	3.72168	0.583726	72	pc03
PPA33667	1.61024	0.747434	72	pc03
PPA26385	4.29595	0.706673	73	pc03
PPA12252	0.0687295	0.872306	73	pc03
Iso_D.13269.1	3.5518	0.535513	73	pc03
ppa_stranded_DN23468_c0_g1_i1	1.5129	0.557967	74	pc03
PPA07602	0.234814	0.511935	74	pc03
ppa_stranded_DN27433_c0_g3_i4	2.67498	2.08212	74	pc03
PPA05064	2.15587	1.86282	74	pc03
Contig6-snapTAU.312	3.36877	0.63167	74	pc03
ppa_stranded_DN21341_c0_g1_i1	1.42132	0.843867	75	pc03
PPA42576	1.40739	1.18942	75	pc03
PPA09827	1.74186	1.03523	76	pc03
Iso_D.6086.1	2.93972	0.587855	77	pc03
PPA11618	1.17338	2.18358	77	pc03
ppa_stranded_DN25836_c0_g1_i1	3.17514	0.503836	77	pc03
PPA13818	1.00148	1.26524	78	pc03
PPA34576	0.0727572	1.30911	78	pc03
seq3_C45B11.6	1.43553	0.634258	78	pc03
ppa_stranded_DN17487_c0_g1_i1	2.2896	2.24758	78	pc03
ppa_stranded_DN28762_c0_g1_i2	-0.306459	0.643963	78	pc03
ppa_stranded_DN48194_c0_g1_i1	0.390003	0.510889	78	pc03
PPA36492	-0.0562305	0.625734	78	pc03
PPA04672	2.80538	0.866474	78	pc03
PPA35242	1.91221	0.761392	78	pc03
ppa_stranded_DN19599_c0_g1_i1	4.62485	0.599154	78	pc03
PPA41077	0.684064	0.702514	78	pc03
ppa_stranded_DN29891_c0_g1_i1	0.424032	1.13565	79	pc03
ppa_stranded_DN31503_c0_g2_i7	2.91032	0.597259	79	pc03
PPA41686	-0.603117	0.622213	79	pc03
ppa_stranded_DN18000_c0_g1_i1	3.03942	3.4338	79	pc03
Iso_D.9125.3	4.63095	1.04358	79	pc03
PPA12792	0.294235	0.84978	79	pc03
ppa_stranded_DN24603_c0_g1_i1	0.271899	0.652852	79	pc03
ppa_stranded_DN26651_c0_g2_i1	2.93075	0.686439	80	pc03
PPA39276	2.38299	0.629702	80	pc03
ppa_stranded_DN42475_c0_g1_i1	0.387703	1.12039	80	pc03
PPA13002	1.01654	1.34079	80	pc03
PPA09811	5.07419	0.568385	80	pc03
PPA14259	2.64716	0.513118	80	pc03
Iso_D.5359.1	0.848253	0.843866	80	pc03
ppa_stranded_DN44483_c0_g1_i1	1.52743	0.854743	81	pc03
PPA36189	1.20583	1.29338	81	pc03
PPA18674	1.84182	0.686703	81	pc03
PPA41600	-0.342285	0.929259	81	pc03
ppa_stranded_DN15470_c0_g2_i1	3.18937	0.920239	81	pc03
PPA32736	3.15615	1.4958	82	pc03
ppa_stranded_DN31138_c10_g1_i7	0.703563	0.608835	82	pc03
ppa_stranded_DN26998_c0_g1_i1	9.02183	0.636248	82	pc03
PPA35560	1.71244	0.587569	82	pc03
PPA27467	0.765216	0.989901	82	pc03
PPA40762	1.4233	0.83992	82	pc03
PPA19647	0.0883969	0.57024	83	pc03
PPA33631	0.960574	0.532778	83	pc03
PPA10851	3.33949	1.97399	83	pc03
ppa_stranded_DN20694_c0_g3_i1	-0.263961	0.6638	84	pc03
ppa_stranded_DN30937_c2_g3_i5	3.4491	0.579921	84	pc03
PPA06264	2.61934	1.14237	84	pc03
PPA33115	2.25893	0.569373	85	pc03
ppa_stranded_DN31577_c4_g1_i3	-0.559471	0.640324	85	pc03
PPA38244	1.62504	1.19857	85	pc03
PPA01576	3.91283	1.21656	85	pc03
PPA28789	2.45372	1.35019	85	pc03
PPA41680	-0.3107	0.673109	85	pc03
PPA03411	0.905008	0.818308	85	pc03
PPA12113	0.941611	1.05735	86	pc03
PPA06058	0.425262	1.62296	86	pc03
PPA36656	8.27594	2.61252	86	pc03
Contig22-snapTAU.16	1.37619	0.545036	86	pc03
ppa_stranded_DN31317_c0_g2_i1	0.589223	1.10042	86	pc03
ppa_stranded_DN33889_c0_g1_i1	1.1259	0.889055	86	pc03
PPA08838	0.397058	0.589706	87	pc03
PPA00818	8.27851	2.70262	87	pc03
PPA38317	1.85041	2.34022	87	pc03
PPA40515	1.0536	1.5911	87	pc03
PPA20015	1.92462	0.585163	88	pc03
ppa_stranded_DN17913_c0_g2_i1	1.97513	0.649377	88	pc03
PPA15503	0.829466	0.93761	88	pc03
PPA33690	2.75243	3.26308	88	pc03
Iso_D.9683.2	3.06748	1.52396	88	pc03
PPA18709	2.44145	0.503241	89	pc03
PPA00976	1.23073	0.560298	89	pc03
ppa_stranded_DN31111_c0_g2_i4	-0.666609	0.523113	90	pc04
PPA13338	3.54444	0.602244	90	pc04
PPA38800	-0.533724	0.740855	90	pc04
PPA21942	1.93211	1.14849	90	pc04
PPA37474	3.15357	2.23204	90	pc04
PPA40490	0.563233	0.700336	90	pc04
PPA39558	0.593741	0.71177	90	pc04
PPA03440	-0.0953839	0.733457	90	pc04
PPA09836	3.33843	0.802987	91	pc04
PPA42211	4.18299	0.877976	91	pc04
ppa_stranded_DN28189_c0_g1_i5	0.442418	1.96064	91	pc04
ppa_stranded_DN16283_c0_g2_i1	1.88226	1.2018	92	pc04
PPA40675	0.912585	0.815843	92	pc04
ppa_stranded_DN15811_c0_g1_i1	2.68179	0.665122	92	pc04
PPA08201	0.638653	0.576948	92	pc04
PPA14951	0.0175476	0.81213	93	pc04
ppa_stranded_DN19147_c0_g1_i1	1.08588	0.534843	94	pc04
PPA08503	7.72592	2.5687	94	pc04
PPA06614	1.17291	0.82891	94	pc04
PPA39138	2.99252	1.32262	94	pc04
PPA06652	3.50979	0.883635	94	pc04
PPA16444	2.24235	1.45713	95	pc04
PPA28620	-0.610376	0.572712	95	pc04
Contig13-snapTAU.388	-0.0954957	0.904206	95	pc04
ppa_stranded_DN15215_c0_g1_i1	1.54799	0.550303	95	pc04
PPA15980	0.509174	0.500992	95	pc04
PPA42742	-0.510358	0.662487	95	pc04
ppa_stranded_DN28560_c0_g1_i3	1.26893	0.740455	95	pc04
PPA36204	1.58131	0.593116	95	pc04
PPA46310	-0.493812	0.599781	95	pc04
PPA34345	8.7317	3.21414	95	pc04
PPA00100	2.51556	0.652555	96	pc04
PPA14796	0.430358	0.524633	96	pc04
PPA05782	4.7076	0.970766	96	pc04
ppa_stranded_DN30117_c1_g1_i2	2.12439	0.510701	96	pc04
PPA21669	3.75891	0.519992	96	pc04
ppa_stranded_DN25120_c0_g1_i1	2.54911	0.864779	96	pc04
PPA18273	0.627876	0.814227	97	pc04
ppa_stranded_DN27845_c0_g3_i3	5.29312	1.07379	97	pc04
PPA18417	1.34972	0.602043	97	pc04
PPA36244	-0.0036421	0.649904	98	pc04
PPA19144	-0.097701	0.536448	98	pc04
Iso_D.7493.1	2.93064	1.45924	98	pc04
PPA36622	4.01108	0.566476	99	pc04
ppa_stranded_DN31048_c0_g1_i1	2.07628	0.972261	99	pc04
ppa_stranded_DN23583_c0_g2_i1	7.25527	0.920267	99	pc04
ppa_stranded_DN17902_c0_g1_i1	3.69203	1.04063	99	pc04
PPA16968	1.7629	0.744318	100	pc04
PPA33222	0.668092	0.644074	100	pc04
ppa_stranded_DN21861_c0_g1_i1	1.35243	0.606211	101	pc04
PPA03063	2.81549	0.677788	101	pc04
ppa_stranded_DN21298_c1_g1_i1	-0.335672	0.540629	101	pc04
PPA06238	-0.0699984	0.660676	101	pc04
Contig51-snapTAU.158	-0.121633	0.643667	102	pc04
PPA03364	3.61249	1.25748	103	pc04
ppa_stranded_DN20171_c0_g1_i1	1.04044	1.00338	104	pc04
PPA06009	0.64583	1.70339	104	pc04
PPA43326	2.55201	0.963998	105	pc04
ppa_stranded_DN15428_c0_g1_i1	5.29726	1.16316	105	pc04
ppa_stranded_DN31515_c3_g3_i17	1.90317	0.954602	105	pc04
PPA38979	0.653575	0.566413	106	pc04
PPA19077	2.74537	0.922302	106	pc04
PPA41633	3.38369	2.90997	107	pc04
PPA01575	4.57629	2.48017	107	pc04
PPA02972	3.16145	1.49422	107	pc04
PPA28862	5.59802	3.01539	107	pc04
PPA39045	2.50843	0.839998	108	pc04
PPA21043	4.8687	0.647093	108	pc04
PPA37715	-0.196678	0.658602	108	pc04
ppa_stranded_DN22150_c0_g1_i2	1.46387	1.03071	109	pc04
PPA00163	3.98681	0.623615	110	pc04
PPA39656	0.399532	1.1984	111	pc04
PPA22590	3.90245	0.617593	111	pc04
PPA13989	5.32171	0.947265	111	pc04
PPA26906	0.598783	0.590056	111	pc04
PPA44204	-0.429077	0.514092	112	pc04
Iso_D.12578.1	-0.569856	0.547452	112	pc04
PPA23341	0.21517	0.630743	113	pc04
PPA35797	6.68658	2.78626	113	pc04
PPA06985	0.102349	0.662634	113	pc04
PPA17486	0.837657	1.12821	113	pc04
PPA27474	2.73	1.77928	114	pc04
PPA05287	4.78014	2.27131	114	pc04
ppa_stranded_DN30724_c0_g4_i1	-0.319705	0.653429	114	pc04
ppa_stranded_DN44989_c0_g1_i1	-0.0989233	0.865779	114	pc04
PPA07280	4.05295	0.562279	115	pc04
ppa_stranded_DN29739_c0_g1_i1	2.25588	1.03945	115	pc04
PPA09598	2.10975	1.88575	116	pc04
ppa_stranded_DN27485_c0_g1_i6	4.46189	0.500232	116	pc04
PPA38417	4.85013	1.82119	116	pc04
PPA31217	-0.57189	0.5658	116	pc04
PPA05792	-0.201274	0.97524	117	pc04
PPA31547	0.828213	1.40288	117	pc04
ppa_stranded_DN25354_c0_g1_i1	2.54773	0.55808	117	pc04
PPA01585	0.674838	1.74784	117	pc04
ppa_stranded_DN16515_c0_g1_i1	2.31977	1.59967	118	pc04
ppa_stranded_DN31301_c2_g1_i2	3.25298	1.80209	118	pc04
PPA32938	-0.214205	1.69455	118	pc04
Contig24-snapTAU.242	-0.503949	0.706343	119	pc04
PPA18510	0.261188	0.599177	120	pc05
PPA41569	0.863093	0.5228	120	pc05
PPA41368	1.78841	2.38509	121	pc05
PPA40221	0.320404	1.36091	121	pc05
PPA13040	2.68708	0.618	121	pc05
PPA11369	0.243043	0.892807	122	pc05
PPA07721	1.13428	1.05411	122	pc05
PPA01683	3.00044	0.559509	122	pc05
ppa_stranded_DN44750_c0_g1_i1	2.21429	0.754944	122	pc05
PPA18682	-0.229546	0.703765	122	pc05
PPA09505	0.160367	1.72999	122	pc05
PPA26329	-0.482817	0.603316	123	pc05
PPA10318	3.06026	1.05273	123	pc05
PPA42686	0.89335	2.3658	124	pc05
PPA31243	0.20633	0.763831	125	pc05
PPA28622	0.398408	0.774516	125	pc05
PPA46046	-0.0788426	1.11668	125	pc05
ppa_stranded_DN15006_c0_g1_i1	0.304619	0.612883	125	pc05
ppa_stranded_DN20254_c0_g1_i1	2.43906	0.770394	125	pc05
PPA06258	1.50605	0.63455	125	pc05
PPA41504	0.315672	2.20253	126	pc05
ppa_stranded_DN21694_c0_g1_i2	2.16817	1.57102	126	pc05
PPA37447	2.20353	2.65056	126	pc05
PPA11994	-0.264493	1.2719	127	pc05
PPA01887	2.12972	1.02779	127	pc05
ppa_stranded_DN30092_c0_g1_i2	2.6406	0.680379	127	pc05
ppa_stranded_DN39769_c0_g1_i1	2.43702	0.709744	127	pc05
PPA35517	2.47342	2.68745	127	pc05
PPA22371	0.832317	0.738518	128	pc05
PPA39291	1.14413	1.19766	129	pc05
PPA02793	0.636785	1.323	129	pc05
PPA23378	-0.586463	0.564701	129	pc05
PPA33639	0.649431	0.611759	130	pc05
ppa_stranded_DN18281_c0_g1_i1	-0.529227	0.657258	130	pc05
PPA40777	-0.307115	0.858224	130	pc05
PPA36934	-0.111936	1.01973	130	pc05
ppa_stranded_DN28497_c0_g2_i3	0.909144	1.96729	130	pc05
PPA00358	2.92757	0.767337	130	pc05
PPA02011	-0.387789	0.796483	130	pc05
PPA35818	1.30027	0.510396	131	pc05
PPA34418	-0.0826877	1.37977	131	pc05
ppa_stranded_DN10760_c0_g1_i1	-0.236787	0.732147	131	pc05
ppa_stranded_DN20336_c0_g1_i1	1.39848	0.502249	132	pc05
Contig64-snapTAU.99	2.61617	0.682439	132	pc05
PPA38461	4.8825	0.512696	132	pc05
PPA11612	6.37465	2.31332	132	pc05
ppa_stranded_DN30418_c0_g1_i3	1.03378	0.974419	133	pc05
PPA05136	3.08521	0.604834	133	pc05
PPA12732	2.23271	0.882996	133	pc05
PPA14644	0.551651	0.546154	134	pc05
PPA44659	0.72382	0.585875	134	pc05
ppa_stranded_DN31433_c3_g4_i1	5.51423	1.30242	134	pc05
ppa_stranded_DN21874_c0_g1_i2	-0.0358408	0.729007	135	pc05
PPA07236	0.658803	0.945216	135	pc05
PPA38501	4.10084	1.12449	135	pc05
PPA40676	3.13027	4.15777	136	pc05
PPA42694	-0.307191	1.22169	136	pc05
ppa_stranded_DN21912_c0_g2_i1	0.762096	0.513172	136	pc05
PPA15961	0.642967	1.35573	136	pc05
PPA45678	0.310647	0.988011	136	pc05
PPA34191	0.555108	1.30087	136	pc05
PPA34628	1.51527	2.16159	136	pc05
PPA38653	1.56694	0.625559	136	pc05
PPA21350	-0.376987	0.708516	136	pc05
ppa_stranded_DN14759_c0_g1_i1	5.8342	0.572937	137	pc05
PPA32545	0.988213	1.06987	138	pc05
PPA34683	-0.660329	0.502499	138	pc05
PPA06026	1.44247	0.711365	139	pc05
PPA36112	0.00679265	0.861716	139	pc05
PPA41501	0.626338	2.73301	139	pc05
PPA12863	-0.286612	0.519394	140	pc05
PPA23891	0.465569	1.18219	140	pc05
PPA36228	3.08583	0.766136	141	pc05
PPA29999	-0.31537	0.700334	143	pc05
PPA11302	4.57725	0.623965	143	pc05
PPA40271	2.05755	1.41592	143	pc05
ppa_stranded_DN24680_c0_g1_i1	0.559759	0.721608	143	pc05
PPA39627	-0.16517	1.1422	143	pc05
ppa_stranded_DN30960_c6_g2_i14	1.70991	0.710351	144	pc05
ppa_stranded_DN28328_c1_g1_i1	1.65037	0.685805	144	pc05
ppa_stranded_DN28215_c0_g1_i1	2.24645	2.6127	144	pc05
PPA35580	0.006466	0.50509	144	pc05
PPA40253	1.3794	0.626713	144	pc05
PPA43246	1.32161	1.02549	145	pc05
PPA39454	4.06967	1.01093	145	pc05
PPA38012	5.40234	0.735094	145	pc05
PPA43455	0.998028	1.09218	146	pc05
ppa_stranded_DN31054_c3_g7_i1	3.86911	0.753079	146	pc05
PPA21475	6.26656	3.3252	148	pc05
PPA04230	0.120429	0.947215	148	pc05
ppa_stranded_DN24089_c0_g2_i3	-0.394309	0.741216	148	pc05
ppa_stranded_DN15993_c0_g2_i1	1.52611	0.947524	149	pc05
PPA36476	0.0465549	0.760401	149	pc05
PPA01850	3.08078	1.31805	149	pc05
PPA00988	-0.201503	1.37938	149	pc05
PPA16354	2.48453	0.532312	149	pc05
PPA18255	0.934406	0.716578	150	pc06
Contig35-snap.117	5.51659	1.0332	150	pc06
PPA16697	4.97259	3.54286	150	pc06
PPA44216	-0.0591868	0.661841	150	pc06
PPA39164	2.61748	1.78761	150	pc06
ppa_stranded_DN28735_c0_g2_i2	1.32254	2.35022	150	pc06
PPA35821	0.177371	1.26673	150	pc06
PPA24412	0.28278	0.789717	150	pc06
PPA18633	-0.0852517	0.827584	151	pc06
PPA03959	-0.495539	0.559224	152	pc06
Iso_D.6620.6	0.286692	0.527365	152	pc06
PPA35059	2.23146	3.11846	152	pc06
PPA27070	5.20082	0.686102	152	pc06
PPA45687	-0.388052	1.16771	153	pc06
PPA23636	2.8157	0.743769	153	pc06
PPA33630	5.44226	3.33471	154	pc06
PPA40035	2.42349	1.41872	154	pc06
ppa_stranded_DN30977_c1_g1_i1	2.76236	0.972862	154	pc06
PPA09930	-0.382917	0.583293	154	pc06
PPA35182	1.22109	1.51729	155	pc06
PPA05971	3.37526	0.622195	155	pc06
ppa_stranded_DN42685_c0_g1_i1	0.235903	0.55882	156	pc06
PPA35285	0.590187	0.726303	156	pc06
PPA43943	0.585506	0.854974	157	pc06
PPA00851	3.80455	0.614526	157	pc06
PPA29988	-0.588898	0.575111	158	pc06
PPA41406	1.32817	0.662002	158	pc06
PPA43775	1.64793	1.453	158	pc06
UMM-S50-12.34-mRNA-1_truncated_curated	-0.0927317	0.737566	158	pc06
PPA29797	-0.727556	0.573973	158	pc06
PPA43406	0.865282	0.708774	159	pc06
Contig60-snapTAU.64	-0.0537567	0.609071	159	pc06
PPA45427	2.26282	1.34817	159	pc06
PPA28074	1.21115	0.735835	159	pc06
PPA17251	6.34204	2.58404	160	pc06
PPA37615	0.6085	1.16899	160	pc06
PPA44360	0.784551	3.02983	160	pc06
PPA46434	-0.439889	0.83509	161	pc06
PPA18717	3.37045	0.779392	161	pc06
ppa_stranded_DN15650_c0_g1_i1	0.66064	0.896671	161	pc06
PPA37039	0.166874	1.47288	161	pc06
PPA13134	2.23022	1.60109	162	pc06
PPA20310	0.498984	2.38213	162	pc06
PPA14599	3.40438	0.647528	162	pc06
PPA25101	0.229682	0.58031	163	pc06
Contig3-snapTAU.41	-0.11226	0.658436	164	pc06
PPA11244	-0.209166	0.687447	164	pc06
PPA04273	1.78066	1.68903	165	pc06
ppa_stranded_DN15715_c0_g2_i1	0.508481	1.22957	165	pc06
ppa_stranded_DN24767_c0_g3_i1	0.712491	0.899441	165	pc06
PPA37829	2.21061	0.552854	166	pc06
PPA23928	0.1491	0.57933	166	pc06
PPA02113	4.78418	1.80179	166	pc06
PPA45921	4.23565	0.950507	167	pc06
ppa_stranded_DN24038_c0_g1_i3	-0.308003	0.619766	168	pc06
PPA43332	-0.659063	0.54053	168	pc06
ppa_stranded_DN25403_c0_g2_i2	4.43094	0.944103	169	pc06
PPA44949	1.31516	2.37527	169	pc06
ppa_stranded_DN26895_c0_g1_i1	0.870667	0.632715	169	pc06
PPA43248	0.744834	0.774226	169	pc06
PPA13403	-0.295557	0.70892	169	pc06
ppa_stranded_DN29526_c0_g2_i1	2.02484	1.1368	169	pc06
PPA14175	2.81499	1.47599	169	pc06
PPA42542	-0.0434344	0.755525	170	pc06
PPA41682	1.21017	2.32312	170	pc06
PPA41371	0.19361	1.13761	171	pc06
PPA46445	1.62605	2.13806	171	pc06
PPA27617	0.435147	1.25984	172	pc06
ppa_stranded_DN29232_c0_g2_i3	0.0927917	1.13431	172	pc06
PPA01693	2.15083	1.44567	172	pc06
PPA36297	-0.070242	0.631231	172	pc06
PPA00378	-0.610971	0.577772	172	pc06
PPA37626	4.28557	4.02557	173	pc06
PPA39035	-0.0412141	1.50634	173	pc06
PPA24295	-0.439632	0.506686	173	pc06
PPA35058	-0.0322634	0.840504	174	pc06
PPA10730	-0.163394	0.503233	174	pc06
ppa_stranded_DN29764_c0_g1_i1	0.215516	0.886943	174	pc06
PPA32314	3.66765	0.674228	175	pc06
PPA35875	2.01253	3.33919	175	pc06
PPA12205	0.553885	0.749647	176	pc06
PPA43301	0.496824	1.32908	176	pc06
Contig20-snapTAU.141	0.0507509	1.07448	176	pc06
Iso_D.10133.1	2.36972	1.13849	176	pc06
PPA34580	-0.224609	0.838565	176	pc06
PPA40108	6.03197	0.978832	176	pc06
ppa_stranded_DN31261_c3_g1_i1	0.358751	1.46821	176	pc06
PPA05929	2.11698	0.935325	176	pc06
ppa_stranded_DN16220_c0_g1_i1	0.845538	0.998049	177	pc06
ppa_stranded_DN25048_c0_g1_i3	2.22207	0.559594	177	pc06
PPA40579	-0.414341	0.644626	178	pc06
PPA33859	0.713928	0.736821	178	pc06
PPA05512	4.84497	0.525913	179	pc06
PPA40456	4.9918	0.504171	179	pc06
ppa_stranded_DN29637_c1_g1_i8	2.0161	0.582641	179	pc06
PPA25177	2.00664	2.26991	180	pc07
PPA05086	3.17863	2.67423	180	pc07
PPA07961	-0.476741	0.633891	180	pc07
PPA10644	4.67062	3.18478	180	pc07
PPA38488	2.37231	3.55157	180	pc07
PPA35083	-0.48195	0.780792	180	pc07
PPA00057	-0.161002	1.03607	181	pc07
ppa_stranded_DN26934_c0_g1_i2	0.841486	0.874537	181	pc07
PPA45762	0.197053	0.652501	181	pc07
PPA39459	1.93177	0.612137	181	pc07
PPA40326	1.67541	0.641863	182	pc07
PPA38010	0.823281	2.4296	182	pc07
PPA18683	0.560063	0.915877	182	pc07
ppa_stranded_DN31384_c1_g1_i1	0.435743	0.721444	182	pc07
PPA18163	-0.369393	0.786297	182	pc07
PPA15491	-0.413317	0.648394	182	pc07
PPA11131	0.57307	0.802334	182	pc07
PPA39693	2.80699	0.606062	183	pc07
ppa_stranded_DN39734_c0_g1_i1	4.36892	0.591966	183	pc07
PPA42844	4.37443	1.66773	183	pc07
PPA38513	1.25936	0.95513	183	pc07
PPA40513	0.478278	1.74348	183	pc07
PPA09441	8.50671	0.736196	183	pc07
ppa_stranded_DN27943_c1_g2_i1	3.7837	0.62628	183	pc07
ppa_stranded_DN31484_c0_g1_i6	-0.270478	0.574216	184	pc07
PPA20637	1.26304	1.45826	184	pc07
ppa_stranded_DN31199_c0_g3_i1	0.405886	1.3226	184	pc07
PPA45000	1.11246	2.69015	185	pc07
PPA09823	0.220128	1.15127	185	pc07
PPA04433	-0.039779	0.608742	185	pc07
PPA28307	-0.533277	0.646621	185	pc07
ppa_stranded_DN20247_c0_g2_i1	1.78622	1.04991	185	pc07
ppa_stranded_DN31440_c4_g2_i10	-0.363808	0.719675	185	pc07
PPA02779	0.94234	1.11286	185	pc07
PPA46212	-0.130514	1.56351	185	pc07
ppa_stranded_DN28736_c0_g1_i1	0.808587	0.553271	186	pc07
PPA40087	0.472466	0.684007	186	pc07
ppa_stranded_DN31523_c0_g2_i2	0.485414	0.680035	186	pc07
PPA44923	2.19527	2.79673	186	pc07
ppa_stranded_DN17488_c0_g1_i2	1.30972	0.750995	186	pc07
ppa_stranded_DN49370_c0_g1_i1	0.287401	1.49379	186	pc07
PPA41908	-0.00536377	0.80373	186	pc07
PPA14814	-0.110828	0.744847	186	pc07
PPA08176	3.09945	0.620827	186	pc07
PPA11727	2.1608	0.511965	187	pc07
PPA38065	2.70215	1.20211	187	pc07
PPA38218	3.49658	2.8894	187	pc07
PPA03833	-0.65689	0.562839	187	pc07
ppa_stranded_DN28248_c0_g1_i3	0.277763	0.980755	188	pc07
PPA35945	0.268627	0.958935	188	pc07
Contig42-snapTAU.61	0.58248	1.0567	188	pc07
PPA33729	-0.709493	0.54716	188	pc07
PPA37407	1.55775	0.91729	188	pc07
PPA34217	0.450868	0.831909	188	pc07
PPA16050	-0.108091	1.31317	188	pc07
PPA43187	0.472407	0.837665	188	pc07
PPA40448	2.4271	1.59575	188	pc07
ppa_stranded_DN2756_c0_g1_i1	3.35769	0.606411	189	pc07
PPA40332	1.09986	1.21049	189	pc07
PPA42058	1.42456	1.49019	189	pc07
ppa_stranded_DN25502_c0_g3_i1	2.30063	1.52033	189	pc07
UMM-S296-2.47-mRNA-1_frag	0.000341786	1.2431	189	pc07
ppa_stranded_DN21993_c0_g1_i1	1.3529	0.560598	190	pc07
PPA14010	1.29327	1.72953	190	pc07
PPA34602	1.19562	1.05898	190	pc07
PPA25034	-0.21727	0.932473	191	pc07
PPA40895	0.35776	0.841283	191	pc07
PPA13042	-0.0335913	1.20894	191	pc07
PPA41823	-0.608391	0.521022	191	pc07
PPA34513	0.432447	0.911583	191	pc07
PPA42570	1.05104	0.612744	192	pc07
PPA41855	-0.00730173	0.994946	192	pc07
PPA18699	4.16586	0.702508	192	pc07
PPA36999	-0.061494	0.950552	192	pc07
PPA39553	8.75588	2.38991	192	pc07
PPA35348	0.0692125	0.879015	192	pc07
ppa_stranded_DN28919_c1_g3_i1	0.421179	0.586398	192	pc07
PPA07836	0.390579	1.46167	193	pc07
ppa_stranded_DN18407_c0_g1_i1	0.00226836	0.600424	193	pc07
PPA14233	0.674648	0.823994	193	pc07
PPA11918	0.477708	1.22456	193	pc07
ppa_stranded_DN21121_c0_g1_i1	2.19041	0.850851	194	pc07
PPA08741	1.19421	0.842817	194	pc07
PPA38780	-0.108729	0.606766	194	pc07
ppa_stranded_DN15703_c0_g1_i1	0.757371	0.653105	194	pc07
PPA02505	3.65802	0.546818	194	pc07
PPA12311	4.41057	1.68287	195	pc07
PPA28023	0.77597	1.07563	195	pc07
PPA37357	-0.331315	0.54875	195	pc07
ppa_stranded_DN24267_c0_g2_i1	3.0966	0.588565	195	pc07
PPA26186	0.153632	0.957073	195	pc07
Contig35-snapTAU.13	0.257175	1.43161	195	pc07
ppa_stranded_DN21839_c0_g1_i1	0.628313	0.771044	195	pc07
PPA46270	1.51147	1.43268	196	pc07
PPA38216	6.82976	1.09568	196	pc07
PPA00945	-0.345912	0.731845	197	pc07
self-1	14.4338	0.901782	197	pc07
PPA18839	-0.260575	0.803523	197	pc07
PPA26710	2.52499	1.90143	198	pc07
ppa_stranded_DN29373_c2_g2_i5	3.10242	0.592359	198	pc07
ppa_stranded_DN20925_c0_g1_i1	3.13323	0.691846	198	pc07
PPA17838	1.50198	1.69808	198	pc07
PPA03265	8.60968	0.714565	198	pc07
ppa_stranded_DN27378_c0_g1_i3	0.607268	0.551675	198	pc07
PPA35714	6.20314	0.999166	198	pc07
PPA03037	0.948329	0.676069	198	pc07
PPA45812	0.317307	0.629506	199	pc07
PPA40611	-0.384536	0.644015	199	pc07
PPA36376	0.714144	0.623916	199	pc07
PPA41400	1.17331	2.40365	199	pc07
PPA37714	4.37406	1.87213	200	pc07
ppa_stranded_DN27009_c0_g1_i1	0.970005	0.863672	200	pc07
Contig173-snapTAU.14	-0.230045	0.83805	200	pc07
PPA35611	1.8142	1.13226	200	pc07
ppa_stranded_DN25867_c0_g1_i1	-0.185607	1.05926	200	pc07
PPA04732	0.761784	0.730893	200	pc07
PPA14132	0.976989	0.722598	200	pc07
ppa_stranded_DN31437_c3_g5_i5	0.790308	0.807056	201	pc07
PPA09183	6.38652	1.69988	201	pc07
ppa_stranded_DN18041_c0_g1_i1	0.688966	0.786115	201	pc07
ppa_stranded_DN16052_c0_g2_i1	3.13955	0.617795	201	pc07
ppa_stranded_DN30655_c1_g1_i3	1.4062	1.12521	201	pc07
ppa_stranded_DN25177_c0_g1_i1	1.57662	1.37833	201	pc07
PPA18242	3.44567	2.62541	202	pc07
PPA04866	1.30397	0.839096	202	pc07
PPA12661	0.638458	0.774051	202	pc07
PPA02511	1.16387	0.648277	202	pc07
PPA13676	1.93482	0.629301	202	pc07
ppa_stranded_DN27343_c0_g1_i1	0.126943	0.806194	203	pc07
ppa_stranded_DN31353_c0_g1_i1	-0.0757909	1.15462	203	pc07
ppa_stranded_DN20429_c0_g1_i1	1.9984	0.919706	203	pc07
PPA26173	0.180292	1.03661	203	pc07
PPA01154	1.65019	2.68819	204	pc07
ppa_stranded_DN26030_c0_g2_i1	1.38971	0.898437	204	pc07
PPA31714	-0.317763	0.602856	204	pc07
PPA05616	2.31641	0.607194	204	pc07
ppa_stranded_DN25410_c1_g1_i1	-0.140617	1.41177	205	pc07
ppa_stranded_DN19477_c0_g1_i1	-0.204521	1.01054	205	pc07
ppa_stranded_DN30522_c0_g1_i10	2.75572	0.696974	205	pc07
PPA15344	4.58506	0.622229	205	pc07
PPA17541	-0.0461859	0.830132	205	pc07
PPA42923	0.150962	0.68754	205	pc07
Iso_D.10917.2	0.972346	2.10697	205	pc07
PPA42790	0.00142679	0.583224	205	pc07
ppa_stranded_DN8561_c0_g1_i1	6.58456	1.08764	206	pc07
PPA46060	0.17452	0.870925	206	pc07
PPA40467	1.26745	1.96463	206	pc07
PPA15273	0.31227	1.31629	206	pc07
PPA36660	0.91887	0.87307	206	pc07
PPA38472	2.41787	1.6488	206	pc07
PPA35857	0.24139	0.549055	207	pc07
PPA46216	0.566675	2.16924	207	pc07
PPA00848	0.049113	0.682873	207	pc07
PPA44361	1.1862	0.606553	207	pc07
PPA04237	1.46307	1.03575	207	pc07
PPA37812	0.986972	2.1255	207	pc07
PPA23707	1.25659	0.744379	207	pc07
PPA31885	0.581441	0.676916	207	pc07
ppa_stranded_DN31651_c3_g6_i1	7.76224	0.564205	207	pc07
PPA05575	3.8954	3.15975	207	pc07
PPA02095	2.06716	0.61997	207	pc07
PPA23184	1.34205	1.5098	207	pc07
PPA00750	0.487802	1.44388	207	pc07
PPA43989	0.694103	1.24005	208	pc07
PPA13746	1.98803	1.09743	208	pc07
PPA10038	1.79267	0.963629	208	pc07
ppa_stranded_DN29186_c2_g1_i1	1.65425	1.22786	208	pc07
PPA42069	-0.165164	0.651844	208	pc07
PPA30761	-0.356735	0.569659	208	pc07
PPA38538	2.20796	3.29278	208	pc07
PPA34906	0.0587825	0.807884	209	pc07
PPA36877	0.402319	0.858994	209	pc07
PPA36041	9.54402	1.31916	209	pc07
PPA34824	-0.0221661	1.53356	209	pc07
ppa_stranded_DN28842_c0_g2_i3	1.60358	0.708518	209	pc07
PPA35206	1.48609	1.05109	210	pc08
PPA24957	1.10403	2.49784	210	pc08
PPA24682	-0.24495	0.72509	210	pc08
PPA20403	1.16234	0.824139	210	pc08
ppa_stranded_DN24499_c0_g2_i2	-0.500158	0.613419	210	pc08
ppa_stranded_DN19122_c0_g2_i1	1.7317	0.585269	210	pc08
PPA38296	-0.475502	0.549363	211	pc08
PPA20336	0.0538926	0.717451	211	pc08
ppa_stranded_DN36173_c0_g1_i1	7.89646	0.53198	211	pc08
ppa_stranded_DN19246_c0_g1_i1	1.38476	1.29305	211	pc08
PPA31719	0.0183302	1.3433	211	pc08
PPA26388	1.02804	0.649957	211	pc08
PPA43302	1.17371	1.14358	211	pc08
PPA38539	-0.461028	0.833904	211	pc08
PPA39021	6.06262	1.63713	211	pc08
PPA35974	1.79616	0.511832	212	pc08
ppa_stranded_DN25755_c0_g2_i1	1.39592	0.685743	212	pc08
PPA12822	0.794075	1.50477	212	pc08
PPA42936	-0.535516	0.716655	212	pc08
PPA28065	1.79465	1.37871	212	pc08
PPA15959	-0.0949777	0.593301	212	pc08
PPA41492	-0.09919	0.658195	213	pc08
PPA39662	3.28987	0.772478	213	pc08
PPA23036	1.51202	0.975429	213	pc08
Iso_D.12412.1	-0.21917	1.02146	213	pc08
ppa_stranded_DN29956_c0_g1_i2	3.72432	3.06981	213	pc08
PPA40794	0.958938	2.29323	214	pc08
PPA07801	0.527593	0.728718	214	pc08
PPA00032	0.402142	1.6449	214	pc08
PPA43088	1.47696	0.727901	214	pc08
PPA39450	5.9154	0.980335	214	pc08
ppa_stranded_DN25662_c0_g1_i2	2.80376	1.6334	214	pc08
PPA35429	3.39666	0.567327	214	pc08
PPA15140	0.765617	1.22911	214	pc08
PPA34445	0.111623	0.755928	214	pc08
ppa_stranded_DN32920_c0_g1_i1	1.98169	2.77901	214	pc08
ppa_stranded_DN24864_c0_g1_i1	3.29336	0.799657	215	pc08
PPA15787	2.70796	1.38619	215	pc08
isototal.1523.1	0.620848	0.588591	215	pc08
ppa_stranded_DN24807_c0_g2_i1	0.283745	0.90085	215	pc08
PPA22611	5.39728	0.594339	215	pc08
PPA32739	2.05822	0.58073	215	pc08
PPA33927	0.0292062	0.842154	215	pc08
ppa_stranded_DN30645_c5_g1_i1	0.869113	0.500474	215	pc08
PPA26156	-0.276309	0.731279	216	pc08
PPA43262	0.363139	0.848217	216	pc08
PPA40623	1.08064	1.12081	216	pc08
PPA34330	0.466317	0.921594	216	pc08
UMM-S2845-12.36-mRNA-1_frag	-0.205106	0.939075	217	pc08
ppa_stranded_DN30069_c1_g1_i6	0.16053	0.712364	217	pc08
ppa_stranded_DN29308_c0_g1_i4	2.06147	0.889811	217	pc08
PPA03783	1.4718	3.94107	217	pc08
PPA13577	3.82324	0.529315	217	pc08
PPA29644	0.17812	0.527839	217	pc08
PPA11150	1.36649	1.63033	217	pc08
PPA04177	7.24599	0.54603	217	pc08
PPA26268	2.16331	0.844863	217	pc08
PPA18370	2.39869	3.57101	217	pc08
PPA44328	0.0182262	1.1087	217	pc08
PPA36294	0.472147	0.870967	218	pc08
PPA24947	2.26888	0.769497	218	pc08
ppa_stranded_DN48251_c0_g1_i1	3.60535	0.739471	218	pc08
PPA11894	0.711133	0.52519	218	pc08
ppa_stranded_DN30698_c1_g1_i1	1.17818	1.21982	218	pc08
PPA39317	1.88123	1.78822	219	pc08
PPA36050	-0.0815656	1.20002	219	pc08
PPA45596	3.20734	2.7658	219	pc08
PPA10479	0.0387138	0.59108	219	pc08
ppa_stranded_DN28307_c0_g3_i1	0.236803	0.657455	219	pc08
PPA43918	0.792666	1.62766	219	pc08
PPA35029	0.835211	1.35738	219	pc08
ppa_stranded_DN28940_c0_g1_i2	0.895938	0.932947	220	pc08
ppa_stranded_DN26811_c1_g1_i1	1.96995	1.26175	220	pc08
PPA41312	3.35535	2.71793	220	pc08
ppa_stranded_DN24977_c0_g1_i2	1.43168	0.823323	220	pc08
PPA14594	-0.587829	0.812782	221	pc08
PPA28614	1.10368	0.623534	221	pc08
PPA10579	-0.485317	0.877494	221	pc08
PPA03010	0.746475	0.597495	221	pc08
ppa_stranded_DN43824_c0_g1_i1	5.83739	0.573546	221	pc08
PPA35742	0.189952	0.938725	221	pc08
PPA10248	2.06077	0.785108	221	pc08
ppa_stranded_DN12568_c0_g2_i1	2.33226	1.97269	222	pc08
PPA36048	2.60488	2.97581	222	pc08
ppa_stranded_DN13533_c0_g1_i1	4.04127	0.716666	222	pc08
ppa_stranded_DN18338_c0_g1_i1	4.14523	1.15058	222	pc08
ppa_stranded_DN31180_c6_g2_i1	1.12631	0.794706	222	pc08
PPA40255	-0.557992	0.592705	222	pc08
PPA17433	-0.497107	0.727824	222	pc08
PPA43327	4.09837	0.700628	222	pc08
PPA31245	2.03218	1.27491	222	pc08
PPA29250	4.98141	0.581507	222	pc08
ppa_stranded_DN26329_c0_g1_i2	-0.471236	0.604327	223	pc08
Iso_D.7494.2	-0.475201	0.561951	223	pc08
ppa_stranded_DN24705_c0_g1_i3	1.3057	0.562615	223	pc08
ppa_stranded_DN19168_c0_g1_i1	3.83439	0.569061	223	pc08
PPA21934	0.910179	1.01416	223	pc08
PPA37003	1.91521	0.593012	223	pc08
PPA11015	3.0135	4.49452	223	pc08
ppa_stranded_DN31100_c0_g4_i1	6.68483	1.70762	223	pc08
PPA15347	1.06432	2.00462	223	pc08
PPA12075	3.52186	0.803938	224	pc08
PPA12573	2.82372	1.91923	224	pc08
ppa_stranded_DN29781_c0_g1_i3	2.36506	1.1479	224	pc08
ppa_stranded_DN30117_c0_g1_i5	1.40861	0.530903	224	pc08
ppa_stranded_DN24793_c0_g1_i2	-0.516049	0.827122	224	pc08
ppa_stranded_DN27234_c0_g1_i1	0.648051	1.38597	225	pc08
PPA36946	0.766468	1.66509	225	pc08
PPA39053	1.95339	1.13671	225	pc08
PPA40878	0.137037	0.553138	225	pc08
PPA06299	2.68911	1.89187	225	pc08
PPA43251	0.160934	1.04712	225	pc08
PPA45647	2.96849	2.19956	225	pc08
PPA36143	-0.352308	0.561292	226	pc08
ppa_stranded_DN23839_c0_g1_i4	-0.332397	0.839846	226	pc08
PPA18992	3.46642	0.767234	226	pc08
PPA09301	2.50363	0.969563	226	pc08
PPA30460	0.655733	1.70939	226	pc08
PPA06925	2.75948	0.656908	226	pc08
PPA25540	-0.400326	0.835669	226	pc08
ppa_stranded_DN23087_c0_g1_i1	2.73233	2.89837	226	pc08
PPA37355	3.74306	0.502012	226	pc08
ppa_stranded_DN31415_c0_g2_i1	-0.602355	0.539084	226	pc08
PPA37596	0.139284	1.46173	227	pc08
PPA44331	0.957421	0.518905	227	pc08
ppa_stranded_DN27544_c1_g1_i1	0.673316	1.76108	227	pc08
PPA27749	1.38384	1.0613	227	pc08
PPA00102	0.660896	1.42208	227	pc08
PPA08175	0.850257	0.737367	227	pc08
PPA17459	0.0763103	1.22415	227	pc08
PPA02463	0.442241	1.91961	227	pc08
PPA39069	-0.23061	1.02724	227	pc08
PPA37701	-0.0512328	1.067	228	pc08
PPA39909	2.93635	0.520264	228	pc08
Iso_D.1709.2	0.441312	1.42148	228	pc08
PPA40170	10.4691	0.985818	228	pc08
PPA35671	0.391023	0.901309	228	pc08
PPA38805	2.33362	0.967158	229	pc08
PPA28213	4.2583	1.10277	229	pc08
PPA36480	1.13284	2.20377	229	pc08
PPA11925	1.93427	1.32135	229	pc08
ppa_stranded_DN27656_c0_g2_i4	0.0836312	0.58322	229	pc08
PPA13659	0.445577	1.31107	229	pc08
Contig8-snapTAU.425	0.181734	1.32009	229	pc08
PPA39990	0.856958	0.847788	229	pc08
PPA33704	-0.0559043	0.875901	230	pc08
ppa_stranded_DN17823_c0_g4_i1	3.38938	1.20157	230	pc08
PPA09822	-0.581567	0.706259	230	pc08
PPA16957	-0.177303	0.524142	230	pc08
PPA38018	0.756877	0.554621	230	pc08
PPA33331	0.412915	0.541573	230	pc08
PPA07794	6.65602	0.596346	231	pc08
ppa_stranded_DN23460_c0_g1_i2	1.36297	0.851688	231	pc08
PPA38744	1.48287	1.07871	231	pc08
Iso_D.6178.1	5.86176	0.543577	231	pc08
ppa_stranded_DN18216_c0_g1_i1	0.790192	0.730222	231	pc08
PPA11451	0.584798	1.38089	231	pc08
PPA14346	3.19168	0.504217	231	pc08
PPA42585	-0.210657	0.629452	231	pc08
PPA38085	1.40841	1.21598	232	pc08
ppa_stranded_DN7977_c0_g2_i1	0.237957	1.15034	232	pc08
PPA16051	-0.450961	0.96902	232	pc08
PPA18219	0.826269	1.82533	232	pc08
PPA37096	1.36168	1.60527	232	pc08
PPA36268	1.43314	0.619229	232	pc08
ppa_stranded_DN16719_c0_g1_i1	-0.0673052	0.951311	232	pc08
PPA37465	3.28009	3.70217	232	pc08
PPA34553	0.0770384	0.522377	232	pc08
PPA13665	0.0982865	1.16005	233	pc08
PPA12401	-0.279996	0.956186	233	pc08
PPA31641	2.01864	0.594075	233	pc08
PPA26332	-0.494824	0.534668	233	pc08
PPA01832	1.90281	4.51877	233	pc08
PPA33578	-0.0822401	0.873084	233	pc08
ppa_stranded_DN26084_c0_g4_i1	1.30435	2.05722	233	pc08
PPA25816	-0.481032	0.574156	233	pc08
PPA00772	1.02518	2.38025	233	pc08
PPA42092	0.684607	0.836951	233	pc08
ppa_stranded_DN31286_c1_g3_i3	0.681516	0.998102	234	pc08
PPA09931	-0.191433	1.05233	234	pc08
PPA05981	0.104981	1.06145	234	pc08
PPA35701	5.10967	1.08194	234	pc08
PPA23879	0.187188	0.615484	234	pc08
ppa_stranded_DN30144_c1_g1_i1	0.574384	0.518596	234	pc08
PPA33821	1.01048	1.51359	234	pc08
PPA00351	3.38311	0.92965	234	pc08
ppa_stranded_DN26763_c0_g1_i1	-0.210357	0.936201	234	pc08
PPA08029	-0.537218	0.541428	234	pc08
ppa_stranded_DN12118_c0_g1_i1	0.91665	1.57906	234	pc08
PPA03516	-0.190633	0.932313	235	pc08
PPA42517	-0.601917	0.600045	235	pc08
PPA33870	3.69438	0.730574	235	pc08
PPA41412	0.263321	1.40141	235	pc08
PPA34714	0.880166	0.552555	235	pc08
PPA40319	1.97185	1.3183	235	pc08
PPA35894	3.44985	0.571886	235	pc08
PPA38271	-0.110472	0.718765	235	pc08
ppa_stranded_DN19996_c0_g1_i1	2.80684	0.683915	236	pc08
ppa_stranded_DN8894_c0_g1_i1	0.616406	1.73348	236	pc08
ppa_stranded_DN25744_c0_g1_i2	1.55111	1.41892	236	pc08
ppa_stranded_DN26159_c0_g1_i1	0.621843	2.08518	236	pc08
PPA35387	2.9154	0.703326	236	pc08
isopolya.7033.1	2.33275	0.50955	236	pc08
PPA41012	-0.652369	0.503156	236	pc08
ppa_stranded_DN16480_c0_g1_i1	0.51267	2.11938	236	pc08
ppa_stranded_DN31025_c1_g1_i4	1.21514	0.8477	236	pc08
PPA41553	-0.0397508	0.809158	237	pc08
PPA40512	-0.378153	0.857698	237	pc08
ppa_stranded_DN18640_c0_g1_i1	2.38666	0.596665	237	pc08
PPA43663	1.85681	2.11849	237	pc08
PPA06801	2.83152	0.822252	237	pc08
ppa_stranded_DN19022_c0_g1_i1	2.19883	0.553534	237	pc08
PPA34388	0.167779	1.06876	237	pc08
ppa_stranded_DN11551_c0_g1_i1	4.24314	1.71112	237	pc08
PPA17636	1.08598	0.745803	237	pc08
PPA23304	-0.635903	0.723401	237	pc08
ppa_stranded_DN18662_c0_g1_i2	2.35932	0.69394	238	pc08
PPA46072	0.636339	0.824015	238	pc08
PPA09864	0.982985	3.01504	238	pc08
ppa_stranded_DN18013_c0_g2_i1	4.48847	2.48894	238	pc08
PPA00177	1.06508	0.832725	238	pc08
ppa_stranded_DN19944_c0_g1_i2	0.844815	2.52466	238	pc08
ppa_stranded_DN30659_c1_g2_i1	4.78066	0.609411	238	pc08
ppa_stranded_DN29949_c0_g1_i5	3.66019	0.751465	238	pc08
PPA18369	0.42907	2.33515	239	pc08
PPA18685	2.38002	0.646139	239	pc08
PPA42076	1.01097	2.27331	239	pc08
PPA17671	-0.150398	0.622642	239	pc08
ppa_stranded_DN16986_c1_g1_i1	-0.101216	1.42287	239	pc08
PPA34652	-0.410309	0.970774	239	pc08
PPA00540	6.39581	0.592093	239	pc08
PPA42157	0.783464	2.54712	239	pc08
PPA11836	1.68152	2.09194	239	pc08
PPA27491	0.190702	0.850295	239	pc08
PPA08718	0.0212622	1.63433	239	pc08
PPA10077	0.013009	1.08714	239	pc08
ppa_stranded_DN30541_c5_g2_i1	-0.393418	0.530182	240	pc09
PPA41135	0.343628	1.85796	240	pc09
PPA36639	1.30334	1.49558	240	pc09
PPA44124	1.50122	1.96753	240	pc09
ppa_stranded_DN23115_c0_g1_i1	2.42643	0.528175	240	pc09
PPA24008	2.10147	0.804903	240	pc09
PPA22942	0.816603	0.538331	240	pc09
ppa_stranded_DN29554_c1_g1_i14	7.26178	0.779544	240	pc09
PPA35490	0.909146	0.930887	240	pc09
PPA33597	2.19112	0.594503	240	pc09
PPA17298	1.33924	1.63382	240	pc09
PPA11776	0.179469	1.09506	240	pc09
ppa_stranded_DN7764_c0_g1_i1	1.36202	2.32901	240	pc09
ppa_stranded_DN25871_c0_g1_i2	0.987998	1.11869	241	pc09
ppa_stranded_DN28686_c1_g1_i2	0.113831	1.16011	241	pc09
PPA36867	1.20468	1.99003	241	pc09
PPA36629	1.36236	1.4441	241	pc09
PPA45577	1.66723	2.57613	241	pc09
PPA19025	-0.0631136	1.27199	241	pc09
PPA16908	0.068224	0.630337	241	pc09
ppa_stranded_DN23035_c0_g1_i1	2.37193	0.540356	241	pc09
PPA03076	3.16032	1.54647	241	pc09
PPA14711	3.71071	3.20771	241	pc09
ppa_stranded_DN26295_c1_g1_i1	1.27834	0.637665	241	pc09
PPA35744	-0.11242	0.947456	241	pc09
PPA33783	2.60365	4.06254	241	pc09
PPA02334	0.550469	0.574457	241	pc09
ppa_stranded_DN586_c0_g1_i1	0.360135	1.31359	241	pc09
isopolya.5614.1	3.73001	0.732428	242	pc09
PPA28877	0.702935	1.66425	242	pc09
ppa_stranded_DN20379_c0_g1_i2	2.94835	0.63064	242	pc09
ppa_stranded_DN22006_c0_g1_i1	-0.229728	1.0797	242	pc09
Iso_D.667.1	-0.117646	0.863725	242	pc09
PPA35204	-0.0532591	0.773521	242	pc09
ppa_stranded_DN26431_c0_g1_i1	1.47991	1.52918	242	pc09
PPA45858	2.10964	2.93011	242	pc09
PPA44906	3.64153	0.651968	243	pc09
PPA39832	1.29363	0.639075	243	pc09
ppa_stranded_DN31052_c4_g6_i3	1.25257	0.584112	243	pc09
ppa_stranded_DN33441_c0_g1_i1	2.35268	0.586294	243	pc09
PPA11944	2.45451	1.24354	243	pc09
PPA01788	0.372548	0.646549	244	pc09
PPA17559	1.57661	1.54198	244	pc09
PPA39495	0.775065	1.76076	244	pc09
PPA21459	1.6368	0.696736	244	pc09
PPA32019	0.590626	1.70631	244	pc09
PPA13112	0.673606	0.592775	244	pc09
PPA15978	-0.577461	0.704434	244	pc09
PPA35736	9.19349	0.852179	244	pc09
PPA10105	1.26697	0.63334	244	pc09
ppa_stranded_DN30778_c1_g5_i1	1.97607	1.59726	244	pc09
ppa_stranded_DN24745_c0_g2_i2	1.42333	0.964264	245	pc09
ppa_stranded_DN28512_c1_g2_i4	0.334893	0.934878	245	pc09
ppa_stranded_DN11692_c0_g1_i1	4.344	0.51968	245	pc09
PPA46115	3.03103	0.618769	245	pc09
PPA20625	0.0844671	0.631695	245	pc09
ppa_stranded_DN31465_c0_g2_i1	0.339944	0.688246	245	pc09
PPA08879	3.89154	0.629155	245	pc09
PPA20951	3.03201	1.33746	246	pc09
PPA10728	0.152403	0.809498	246	pc09
ppa_stranded_DN29665_c0_g1_i1	-0.219613	0.893884	246	pc09
ppa_stranded_DN31665_c2_g7_i10	-0.0351129	0.588677	246	pc09
ppa_stranded_DN7825_c0_g1_i1	3.45802	2.16596	246	pc09
ppa_stranded_DN20805_c0_g1_i2	1.26588	1.04016	246	pc09
PPA45564	-0.344462	0.575112	246	pc09
PPA42658	1.37123	1.79363	246	pc09
PPA40001	-0.348418	0.970625	246	pc09
ppa_stranded_DN29764_c1_g2_i2	1.14273	1.7296	246	pc09
ppa_stranded_DN27191_c0_g2_i1	-0.171706	0.503379	246	pc09
PPA01824	1.81699	0.52684	246	pc09
PPA27327	1.77151	2.46636	246	pc09
PPA33669	1.85047	0.757554	247	pc09
ppa_stranded_DN20863_c0_g1_i2	3.65271	0.682976	247	pc09
PPA37706	3.90472	0.877519	247	pc09
ppa_stranded_DN31595_c6_g11_i2	1.2142	0.585854	247	pc09
PPA03100	0.690118	2.78308	247	pc09
PPA23545	1.68349	0.612529	247	pc09
PPA05846	1.6994	0.693672	247	pc09
PPA08725	3.54051	1.30477	247	pc09
ppa_stranded_DN21171_c0_g1_i1	1.78585	1.02772	247	pc09
PPA15346	3.79719	0.632687	248	pc09
PPA20337	0.124718	0.898869	248	pc09
ppa_stranded_DN23735_c1_g1_i2	3.04224	0.827911	248	pc09
ppa_stranded_DN43968_c0_g1_i1	4.3324	0.609798	248	pc09
PPA43059	0.773918	1.11124	248	pc09
PPA07576	3.11878	0.538242	248	pc09
PPA35683	0.370255	1.24618	248	pc09
ppa_stranded_DN29909_c1_g3_i10	0.383907	1.15521	248	pc09
ppa_stranded_DN9674_c0_g1_i1	0.718368	1.54723	248	pc09
PPA36082	1.56434	2.1318	248	pc09
ppa_stranded_DN27510_c0_g1_i1	1.3805	0.867755	249	pc09
ppa_stranded_DN21409_c0_g1_i2	4.51699	0.567424	249	pc09
PPA07705	-0.141971	0.516001	249	pc09
ppa_stranded_DN29299_c0_g3_i1	0.624032	0.967103	249	pc09
PPA44993	-0.499459	0.824016	249	pc09
PPA43453	2.19382	2.45409	249	pc09
PPA25035	2.09379	1.22219	249	pc09
PPA39787	1.30228	1.23944	249	pc09
Iso_D.7434.6	0.627043	1.73309	249	pc09
ppa_stranded_DN4268_c0_g1_i1	5.56696	0.599365	249	pc09
PPA06343	-0.510432	0.571347	249	pc09
PPA38325	-0.139533	0.840431	249	pc09
ppa_stranded_DN8948_c0_g1_i1	-0.0163464	1.28676	250	pc09
ppa_stranded_DN27467_c0_g2_i1	0.268589	0.743529	250	pc09
PPA22003	0.857394	2.56067	250	pc09
PPA01041	3.21964	0.979353	250	pc09
PPA34925	1.1554	0.836122	250	pc09
PPA00926	3.64783	0.645164	250	pc09
PPA42707	1.59592	0.590328	251	pc09
PPA45303	-0.0198077	1.15157	251	pc09
ppa_stranded_DN15609_c0_g2_i1	0.291084	0.795175	251	pc09
PPA26231	0.0542686	0.779055	251	pc09
PPA36918	0.382242	1.40135	251	pc09
PPA31180	1.19343	0.51162	251	pc09
PPA35260	-0.680803	0.503057	251	pc09
PPA36862	-0.324657	0.524726	251	pc09
PPA07004	0.577519	2.48935	251	pc09
ppa_stranded_DN25263_c0_g1_i1	1.04546	1.047	251	pc09
PPA43917	3.19976	2.6608	251	pc09
ppa_stranded_DN21901_c0_g1_i1	1.71247	1.24703	251	pc09
ppa_stranded_DN15386_c0_g1_i1	0.415191	1.49084	251	pc09
ppa_stranded_DN28295_c0_g1_i2	-0.0162461	0.609508	251	pc09
PPA38277	-0.0916642	0.86191	251	pc09
PPA16168	0.0739173	1.72885	251	pc09
PPA38672	-0.131061	0.753836	252	pc09
PPA37723	2.71165	1.59767	252	pc09
ppa_stranded_DN27891_c0_g1_i1	0.225511	0.767147	252	pc09
PPA36139	0.557623	1.62331	252	pc09
PPA24618	2.33009	1.72128	252	pc09
PPA08425	3.5363	0.997583	252	pc09
PPA10895	0.286115	1.05076	252	pc09
UMM-S13-9.39-mRNA-1_frag	-0.154462	0.818687	252	pc09
PPA14232	0.855911	2.4725	252	pc09
PPA45318	2.23894	2.34068	252	pc09
PPA29056	4.37428	1.73404	252	pc09
PPA32775	4.01583	1.64792	253	pc09
ppa_stranded_DN44046_c0_g1_i1	2.95442	0.716418	253	pc09
PPA35687	0.88793	1.17698	253	pc09
ppa_stranded_DN7182_c0_g1_i1	0.832043	2.45847	253	pc09
PPA41866	2.46832	0.885594	253	pc09
ppa_stranded_DN39792_c0_g1_i1	-0.137275	0.610434	253	pc09
PPA37046	-0.336133	0.941003	253	pc09
ppa_stranded_DN31172_c0_g1_i19	-0.309297	1.24373	253	pc09
PPA37636	0.107752	0.63977	253	pc09
PPA34229	-0.0802989	1.26572	253	pc09
ppa_stranded_DN7604_c0_g1_i1	0.490045	2.21641	253	pc09
PPA09400	0.654193	1.7351	254	pc09
PPA04163	1.92269	0.514594	254	pc09
PPA02482	0.0151333	0.860609	254	pc09
PPA46139	-0.704391	0.570002	254	pc09
PPA00228	0.815788	1.77291	254	pc09
PPA43996	0.737298	2.88889	254	pc09
PPA07763	4.71809	1.60846	254	pc09
ppa_stranded_DN28986_c0_g1_i2	1.16695	0.686547	254	pc09
ppa_stranded_DN30632_c1_g16_i2	2.70168	0.55735	254	pc09
ppa_stranded_DN18754_c0_g2_i1	0.767372	1.20123	254	pc09
PPA12977	0.555897	2.14553	254	pc09
PPA24835	-0.173808	1.11376	255	pc09
PPA40793	1.00176	1.93556	255	pc09
PPA31261	-0.202145	0.769726	255	pc09
PPA24961	5.45468	0.708637	255	pc09
PPA25175	1.07635	1.45003	255	pc09
PPA37040	2.25649	0.852794	255	pc09
PPA08774	1.19959	0.825197	255	pc09
PPA43391	2.52299	1.14775	255	pc09
PPA41829	2.24957	0.617923	256	pc09
PPA27179	0.258072	0.760355	256	pc09
PPA16279	1.03641	2.14884	256	pc09
PPA28937	5.36145	4.22343	256	pc09
PPA17384	5.19473	0.750181	256	pc09
Iso_D.8499.1	5.7055	0.541869	256	pc09
PPA01146	1.66548	1.92503	256	pc09
ppa_stranded_DN20961_c1_g1_i1	3.36129	0.611703	256	pc09
PPA26161	0.960415	0.891909	256	pc09
PPA24967	-0.0331266	0.697986	256	pc09
PPA30458	3.10837	2.60193	256	pc09
PPA35468	0.851157	2.27702	256	pc09
PPA04991	-0.293025	0.847298	256	pc09
PPA15657	-0.476234	0.76982	256	pc09
ppa_stranded_DN16152_c0_g2_i1	2.91941	0.661367	256	pc09
ppa_stranded_DN28864_c0_g3_i10	2.78011	0.51074	257	pc09
ppa_stranded_DN2794_c0_g1_i1	2.54933	0.774785	257	pc09
PPA40747	2.63469	2.01745	257	pc09
PPA19052	0.733386	0.635295	257	pc09
PPA17894	0.405783	0.815748	257	pc09
Contig168-snapTAU.2	4.19439	1.11706	257	pc09
PPA40234	1.30411	1.04365	257	pc09
PPA34032	-0.0685379	0.537987	257	pc09
PPA24148	1.02775	1.85578	257	pc09
PPA39273	-0.292673	0.796209	257	pc09
Contig173-snapTAU.12	2.86167	1.8519	257	pc09
ppa_stranded_DN16657_c0_g1_i1	1.39877	1.80659	258	pc09
PPA36755	0.492543	0.944351	258	pc09
PPA42194	0.823943	1.27171	258	pc09
PPA41783	0.409165	0.835728	258	pc09
PPA25796	-0.436614	0.679821	258	pc09
ppa_stranded_DN29153_c1_g1_i5	3.00712	1.23244	258	pc09
ppa_stranded_DN15536_c0_g2_i1	0.623979	0.813777	258	pc09
PPA40930	2.81621	1.11706	258	pc09
PPA20006	1.3242	0.622383	258	pc09
PPA18595	1.47829	0.726286	258	pc09
PPA07065	0.341919	1.17451	258	pc09
ppa_stranded_DN27757_c0_g1_i4	0.752631	0.879622	258	pc09
ppa_stranded_DN29832_c0_g1_i4	3.49581	0.817604	259	pc09
PPA12233	-0.36659	0.629151	259	pc09
ppa_stranded_DN31079_c1_g4_i5	2.74839	0.552461	259	pc09
PPA18299	0.682592	1.74888	259	pc09
PPA36446	1.0265	2.95636	259	pc09
PPA39167	0.563457	1.14852	259	pc09
PPA37525	-0.215998	0.795263	259	pc09
PPA43233	5.91652	1.58237	259	pc09
PPA34956	0.642332	2.26347	259	pc09
PPA37511	2.55373	2.78539	259	pc09
PPA07071	1.03188	0.925778	259	pc09
PPA03958	-0.139267	0.584871	259	pc09
PPA19961	-0.18362	1.18996	259	pc09
PPA36049	1.42126	1.38263	259	pc09
ppa_stranded_DN22249_c0_g1_i1	0.731634	0.526896	259	pc09
PPA24333	0.0914843	1.14831	260	pc09
PPA34891	-0.168107	0.638241	260	pc09
PPA40847	0.930255	0.847047	260	pc09
PPA24742	-0.0784174	0.726102	260	pc09
PPA35891	0.564067	2.49613	260	pc09
PPA27748	2.78198	1.13884	260	pc09
ppa_stranded_DN12219_c0_g1_i1	1.02286	2.73401	260	pc09
PPA02125	-0.302877	0.90894	260	pc09
PPA36694	0.0022928	0.62905	260	pc09
PPA16278	0.2753	1.01319	261	pc09
PPA31606	5.83634	0.665558	262	pc09
ppa_stranded_DN24268_c0_g2_i1	0.170391	1.43316	262	pc09
PPA38416	0.640937	0.555988	262	pc09
PPA34126	3.48927	0.517615	262	pc09
PPA41882	0.268579	1.44001	262	pc09
PPA14934	1.82775	1.07252	262	pc09
PPA41401	0.778124	1.55664	262	pc09
PPA01712	1.6312	0.922339	262	pc09
PPA35949	1.61269	0.958041	262	pc09
PPA33959	6.2602	0.708102	262	pc09
PPA15234	1.70206	0.787337	263	pc09
PPA02601	0.117051	0.711399	263	pc09
PPA41728	-0.420663	1.11386	263	pc09
PPA43985	0.10356	1.49721	263	pc09
PPA36355	0.195671	1.4244	263	pc09
PPA27734	0.0238886	1.11564	263	pc09
ppa_stranded_DN9733_c0_g1_i1	2.25141	0.681214	263	pc09
PPA33737	0.818134	2.57604	263	pc09
PPA11505	-0.268479	0.838506	263	pc09
ppa_stranded_DN29711_c0_g2_i2	4.40231	0.689997	263	pc09
PPA23189	-0.0449584	1.24144	264	pc09
ppa_stranded_DN27894_c1_g2_i4	1.52546	1.18531	264	pc09
PPA11093	1.66363	3.06483	264	pc09
ppa_stranded_DN30991_c0_g1_i1	2.23381	0.551134	264	pc09
Contig21-snapTAU.107	1.58671	1.30996	264	pc09
PPA34232	-0.273493	1.28199	264	pc09
PPA44909	0.373877	0.816571	264	pc09
ppa_stranded_DN30486_c0_g5_i2	2.42794	0.994558	264	pc09
PPA42971	0.0470379	0.523095	264	pc09
ppa_stranded_DN30168_c0_g2_i3	0.715651	0.769493	264	pc09
PPA38383	-0.448758	0.953649	264	pc09
PPA40370	-0.139267	0.503791	265	pc09
PPA27646	0.270928	1.36977	265	pc09
ppa_stranded_DN28671_c0_g1_i1	2.36032	0.502283	265	pc09
PPA01713	0.523486	1.51317	265	pc09
ppa_stranded_DN31172_c0_g1_i10	0.231151	1.1833	265	pc09
Iso_D.14327.2	-0.330223	1.10136	265	pc09
PPA21998	0.306357	1.51052	265	pc09
PPA17448	3.17884	3.59139	265	pc09
PPA38046	2.23135	2.55037	265	pc09
PPA43671	-0.567563	0.541842	265	pc09
PPA18215	0.0386777	1.76732	265	pc09
PPA25324	2.60293	0.724906	266	pc09
ppa_stranded_DN30268_c0_g1_i2	3.53311	0.866547	266	pc09
PPA34693	0.153894	0.810556	266	pc09
Contig54-snapTAU.133	0.797932	1.3214	266	pc09
ppa_stranded_DN26862_c0_g1_i1	-0.058671	1.16233	266	pc09
ppa_stranded_DN5832_c0_g1_i1	4.10499	0.538849	266	pc09
ppa_stranded_DN24116_c0_g1_i3	0.994164	0.698976	266	pc09
Contig54-snapTAU.130	-0.699104	0.575094	266	pc09
PPA44479	-0.188363	0.605263	266	pc09
ppa_stranded_DN29873_c5_g4_i1	-0.50266	0.78579	266	pc09
PPA07225	2.72937	1.31133	266	pc09
ppa_stranded_DN17490_c0_g1_i1	0.605593	1.36739	266	pc09
PPA06408	1.8647	3.35575	266	pc09
PPA43961	-0.0160647	0.811978	266	pc09
ppa_stranded_DN22412_c0_g1_i1	3.7851	0.535884	267	pc09
PPA37161	-0.351074	0.683645	267	pc09
PPA42336	0.704593	0.655714	267	pc09
PPA28144	2.7354	2.05278	267	pc09
PPA14222	0.362466	1.80816	267	pc09
PPA28208	2.77185	1.2586	267	pc09
PPA40005	-0.355346	0.671328	267	pc09
PPA37488	0.364455	1.63838	267	pc09
PPA20381	1.3325	2.89418	267	pc09
PPA33953	-0.130483	0.876772	268	pc09
ppa_stranded_DN28943_c1_g1_i3	3.06055	0.635756	268	pc09
PPA36549	0.924509	0.526009	268	pc09
ppa_stranded_DN26656_c0_g2_i1	0.343461	1.39614	268	pc09
ppa_stranded_DN26348_c0_g2_i1	0.571375	1.36147	268	pc09
ppa_stranded_DN24233_c0_g1_i1	0.902578	1.83967	268	pc09
PPA12256	0.403577	0.673483	268	pc09
PPA21542	-0.133486	0.66114	268	pc09
ppa_stranded_DN28651_c0_g2_i6	0.0521155	1.32534	268	pc09
PPA03734	-0.0106097	0.508107	268	pc09
PPA36865	0.249971	0.722296	269	pc09
PPA36738	1.22643	2.36086	269	pc09
ppa_stranded_DN11011_c0_g1_i1	0.843647	1.70216	269	pc09
PPA01528	2.58365	3.26659	269	pc09
PPA10179	-0.660976	0.512826	269	pc09
UMM-S112-2.26-mRNA-1_frag	0.297253	1.2886	269	pc09
PPA44008	0.205307	0.585664	269	pc09
PPA42418	0.441653	0.940966	269	pc09
PPA08235	1.76256	0.959387	269	pc09
ppa_stranded_DN20690_c0_g1_i1	0.89029	2.18534	269	pc09
PPA28377	0.324633	1.46747	269	pc09
PPA39233	-0.527337	0.560295	269	pc09
PPA28156	0.0841164	1.5592	269	pc09
PPA43843	1.57257	0.562572	269	pc09
PPA27298	1.51574	0.992318	270	pc10
ppa_stranded_DN24936_c0_g1_i2	0.436341	1.19269	270	pc10
PPA26267	0.882481	1.35516	270	pc10
PPA45454	-0.0548721	1.15525	270	pc10
PPA25316	0.491805	1.74017	270	pc10
ppa_stranded_DN31532_c2_g1_i1	0.84159	2.27367	270	pc10
PPA18808	2.46321	3.43067	270	pc10
PPA43180	2.19559	2.08769	270	pc10
ppa_stranded_DN25586_c1_g1_i1	0.34426	0.765486	270	pc10
PPA36063	3.794	0.597992	270	pc10
PPA10110	0.748889	0.780966	270	pc10
PPA03845	3.71483	1.4609	270	pc10
PPA38696	-0.177234	0.670192	271	pc10
PPA20307	0.958207	0.715993	271	pc10
PPA41988	-0.153814	0.936412	271	pc10
PPA36369	-0.0203748	1.61679	271	pc10
ppa_stranded_DN19779_c0_g3_i1	-0.401062	0.57751	271	pc10
PPA38043	3.5285	0.65101	271	pc10
ppa_stranded_DN21638_c0_g2_i1	0.601982	1.81832	271	pc10
PPA26917	2.12967	1.10499	271	pc10
ppa_stranded_DN31569_c7_g1_i1	0.568725	2.16126	271	pc10
PPA15215	4.87963	0.780341	271	pc10
PPA41990	1.25789	0.691226	271	pc10
PPA24337	2.49253	1.29463	271	pc10
ppa_stranded_DN11915_c0_g2_i1	-0.411291	0.986182	271	pc10
PPA41812	2.1165	0.963869	271	pc10
PPA40447	0.584789	1.04762	271	pc10
PPA00380	-0.419922	0.551246	271	pc10
ppa_stranded_DN30270_c2_g1_i2	3.23641	0.504011	271	pc10
isopolya.5550.1	1.57668	1.95782	272	pc10
PPA26276	3.21329	0.717627	272	pc10
PPA15875	1.11925	0.897224	272	pc10
PPA04862	0.167156	1.66425	272	pc10
PPA04586	0.647585	1.25123	272	pc10
ppa_stranded_DN31087_c7_g1_i2	4.3938	0.563585	272	pc10
PPA43221	1.64454	0.531586	272	pc10
ppa_stranded_DN24703_c0_g1_i3	0.939445	1.56991	272	pc10
PPA39116	4.57512	4.80856	272	pc10
ppa_stranded_DN25237_c0_g3_i8	0.713116	1.81923	273	pc10
PPA16391	0.118224	0.593274	273	pc10
PPA29183	3.00627	0.593829	273	pc10
PPA20382	0.896003	1.47248	273	pc10
PPA02431	2.05334	0.740789	273	pc10
ppa_stranded_DN21563_c0_g1_i1	8.45181	2.11659	274	pc10
PPA41155	6.07074	1.24648	274	pc10
PPA39232	1.14664	1.25284	274	pc10
PPA09196	4.46581	0.919348	274	pc10
PPA34521	-0.366634	0.559531	274	pc10
PPA44827	1.4838	2.69515	274	pc10
PPA29357	-0.00647997	1.21257	274	pc10
PPA37850	-0.168205	0.849692	274	pc10
ppa_stranded_DN21281_c0_g1_i1	0.236683	1.14595	274	pc10
ppa_stranded_DN16548_c0_g1_i1	2.07767	2.76962	274	pc10
PPA09697	0.686364	1.59493	274	pc10
ppa_stranded_DN25068_c0_g2_i1	1.28263	0.548715	274	pc10
PPA39960	0.12271	1.66076	274	pc10
PPA16464	-0.0485574	1.68248	274	pc10
PPA37297	1.52361	3.18254	274	pc10
ppa_stranded_DN30162_c0_g1_i4	1.22465	0.65908	274	pc10
ppa_stranded_DN24913_c0_g1_i1	-0.0447712	1.11428	274	pc10
PPA27798	0.925372	1.67221	275	pc10
PPA35806	1.91492	1.19316	275	pc10
ppa_stranded_DN28512_c1_g1_i1	0.695408	1.04198	275	pc10
PPA12107	0.226219	0.68258	275	pc10
PPA40365	2.33065	1.23776	275	pc10
PPA20587	1.37164	0.68821	275	pc10
PPA40838	0.400724	1.78756	275	pc10
ppa_stranded_DN21683_c0_g1_i1	0.620457	2.32983	275	pc10
ppa_stranded_DN26617_c0_g4_i2	-0.192114	0.683956	275	pc10
PPA02182	7.12304	0.646493	275	pc10
PPA40308	2.59433	1.83623	275	pc10
PPA14220	-0.219889	1.07977	275	pc10
PPA01926	2.22662	1.20427	275	pc10
PPA25438	0.195721	1.12671	275	pc10
Iso_D.11061.1	5.93511	0.744703	275	pc10
PPA38435	3.18747	1.29746	275	pc10
Iso_D.11649.1	0.938244	0.564707	275	pc10
ppa_stranded_DN12725_c0_g1_i1	-0.448334	0.860349	275	pc10
PPA13918	2.31883	0.635323	275	pc10
isopolya.6986.1	5.18436	0.543669	276	pc10
ppa_stranded_DN24343_c0_g1_i1	1.87497	0.723185	276	pc10
PPA38753	0.626339	1.20337	276	pc10
PPA28670	-0.351454	0.77862	276	pc10
ppa_stranded_DN30698_c0_g1_i1	-0.480501	0.72957	276	pc10
PPA00508	1.17827	0.857249	276	pc10
PPA34555	0.972153	2.41507	276	pc10
Contig52-snapTAU.37	-0.191882	1.35699	276	pc10
PPA43620	-0.205627	1.36305	276	pc10
UMM-S2859-7.100-mRNA-1_part2	0.130492	1.60394	276	pc10
ppa_stranded_DN15672_c0_g1_i1	1.94937	2.60283	277	pc10
PPA40258	4.29914	0.565463	277	pc10
PPA41141	0.430635	2.61183	277	pc10
ppa_stranded_DN7835_c0_g1_i1	2.71845	2.26772	277	pc10
PPA06784	0.0656784	0.563146	277	pc10
PPA05967	0.0282977	0.729063	277	pc10
PPA29358	0.155586	0.791251	277	pc10
PPA01562	-0.705834	0.543469	277	pc10
ppa_stranded_DN29249_c0_g1_i6	0.859878	0.836441	277	pc10
ppa_stranded_DN20163_c0_g1_i1	2.47894	0.786366	278	pc10
ppa_stranded_DN19039_c0_g1_i1	0.106992	0.602399	278	pc10
PPA37199	1.61254	1.76401	278	pc10
ppa_stranded_DN25681_c0_g2_i4	1.02148	1.49141	278	pc10
ppa_stranded_DN24159_c0_g2_i1	0.821148	1.87885	278	pc10
PPA22390	0.856697	0.551305	278	pc10
Iso_D.12999.2	2.12149	3.03634	278	pc10
ppa_stranded_DN22061_c0_g1_i1	0.16931	1.94478	278	pc10
PPA37220	1.94118	3.07094	278	pc10
ppa_stranded_DN47464_c0_g1_i1	0.194384	1.92276	278	pc10
PPA27702	1.40805	0.871418	278	pc10
ppa_stranded_DN3167_c0_g2_i1	3.27553	3.67888	278	pc10
isopolya.4326.3	1.29945	1.63425	278	pc10
PPA44290	0.657837	1.58931	278	pc10
PPA42208	-0.220609	0.532095	279	pc10
PPA01813	4.71238	0.506558	279	pc10
PPA41139	0.513447	2.77525	279	pc10
PPA27725	2.48732	0.615876	279	pc10
ppa_stranded_DN5175_c0_g1_i1	0.822507	2.85606	279	pc10
PPA19966	2.14588	0.604179	279	pc10
PPA19297	0.223261	1.08423	279	pc10
ppa_stranded_DN21415_c0_g2_i1	1.93486	3.64279	279	pc10
ppa_stranded_DN26788_c0_g1_i1	1.6821	1.15245	279	pc10
PPA36533	0.770206	0.688645	279	pc10
ppa_stranded_DN29645_c1_g1_i1	-0.339859	0.637852	280	pc10
PPA21069	4.44624	3.597	280	pc10
PPA09593	0.245562	1.59078	280	pc10
PPA36332	0.413693	2.53637	280	pc10
PPA45114	8.30803	0.536989	280	pc10
PPA37688	0.89434	3.03534	280	pc10
PPA18126	1.80781	0.755935	280	pc10
PPA01098	5.72631	1.18893	280	pc10
PPA00128	2.13457	0.689215	280	pc10
PPA39030	2.11894	2.75893	280	pc10
PPA02353	2.96888	1.54332	280	pc10
ppa_stranded_DN25586_c0_g1_i1	2.08133	0.525438	280	pc10
PPA37248	1.68573	0.966291	280	pc10
PPA41133	-0.0631748	1.20756	280	pc10
PPA31102	1.99253	2.21391	281	pc10
ppa_stranded_DN11375_c0_g1_i1	2.16347	0.532856	281	pc10
PPA44232	-0.139266	1.60387	281	pc10
PPA25310	2.29997	0.940161	281	pc10
PPA19582	-0.0746983	0.613205	281	pc10
ppa_stranded_DN19105_c0_g2_i1	0.0445317	0.936792	281	pc10
isopolya.4497.1	4.84657	0.520162	281	pc10
PPA28658	1.78533	0.917136	281	pc10
PPA41989	0.0785138	1.57497	281	pc10
Iso_D.968.1	8.12255	0.736345	281	pc10
PPA28223	0.454911	1.45719	281	pc10
PPA09313	-0.320739	0.629796	282	pc10
PPA42663	0.0685298	1.02711	282	pc10
PPA15268	1.87749	0.813833	282	pc10
PPA04743	2.32337	1.31281	282	pc10
PPA37072	-0.15857	0.709738	282	pc10
PPA37262	0.572763	1.25795	282	pc10
PPA38428	2.45722	1.66006	282	pc10
PPA27737	1.26735	1.95528	282	pc10
ppa_stranded_DN31181_c2_g1_i1	4.52944	2.48341	282	pc10
ppa_stranded_DN31727_c0_g1_i1	-0.460436	0.697928	283	pc10
ppa_stranded_DN43957_c0_g1_i1	1.61877	0.819417	283	pc10
ppa_stranded_DN11935_c0_g1_i1	5.3261	0.564262	283	pc10
PPA43345	1.81886	0.6216	283	pc10
PPA37194	-0.390811	1.20613	283	pc10
PPA35513	4.01138	1.78596	283	pc10
PPA34317	-0.323228	1.22657	283	pc10
ppa_stranded_DN24552_c0_g1_i1	2.75412	3.35326	283	pc10
PPA36084	0.0313465	0.856699	283	pc10
Iso_D.9125.1	1.72206	1.20549	283	pc10
ppa_stranded_DN16963_c0_g1_i1	0.616743	1.45406	283	pc10
PPA06731	1.61439	2.90862	283	pc10
ppa_stranded_DN16189_c0_g2_i1	0.000890788	0.894754	283	pc10
PPA37862	-0.499573	0.844975	283	pc10
PPA39363	1.28081	0.762909	283	pc10
PPA18574	-0.234294	0.598083	283	pc10
PPA01078	0.494228	2.11554	283	pc10
ppa_stranded_DN32413_c0_g1_i1	0.655931	1.43137	283	pc10
ppa_stranded_DN31415_c0_g5_i2	0.0488336	1.41431	283	pc10
[truncated: 966 more rows]
