# Supplementary material for: Single worm transcriptomics identifies a developmental core network of oscillating genes with deep conservation across nematodes
Source: HighWire-hosted journal article supplement (doi:10.1101/gr.275303.121), 2021-07-22
Supplement: Supplemental_Table_S4.xlsx [file Supplemental_Table_S4.xlsx]

## Sheet: tb_feature_osc2221_ng2013_fv
Supplemental Table S4 2,221 oscillations in C.elegans Kim et al.
WBgene	Baseline (log2(FPKM))	Amplitude (log2(FPKM))	Phase	Phase Class
WBGene00011113	0.867912	0.612132	0.00587173	pc01
WBGene00008726	2.20879	0.705287	0.0454038	pc01
WBGene00018025	3.91793	0.642434	0.127502	pc01
WBGene00303423	1.25931	0.999683	0.271111	pc01
WBGene00017082	4.01087	0.815354	0.291299	pc01
WBGene00022641	3.48984	0.502317	0.337866	pc01
WBGene00004222	4.59843	1.22008	0.638649	pc01
WBGene00017936	3.15972	0.7033	0.666872	pc01
WBGene00001592	3.11651	0.800382	0.744588	pc01
WBGene00009386	3.24993	1.1982	0.746789	pc01
WBGene00003566	5.98259	0.547248	1.02421	pc01
WBGene00010525	2.79975	1.53816	1.23398	pc01
WBGene00020611	0.110575	0.611198	1.41494	pc01
WBGene00007517	4.14985	1.20223	1.66389	pc01
WBGene00000372	-0.315875	0.584493	1.79724	pc01
WBGene00018052	3.47681	1.58465	1.92737	pc01
WBGene00001757	1.42213	0.781039	2.32547	pc01
WBGene00001055	3.7834	0.596611	2.3896	pc01
WBGene00015435	1.30581	0.7525	2.42948	pc01
WBGene00017127	4.41078	0.924756	2.56996	pc01
WBGene00304992	4.44038	0.703885	2.60514	pc01
WBGene00015476	2.95551	0.897087	2.81777	pc01
WBGene00017748	3.41494	0.749724	2.83031	pc01
WBGene00007340	0.903801	0.627691	2.99993	pc01
WBGene00020156	4.38145	0.583375	3.16923	pc01
WBGene00009485	1.57823	1.15525	3.37074	pc01
WBGene00007142	7.53063	1.06476	3.44765	pc01
WBGene00020143	6.1319	0.84193	3.51104	pc01
WBGene00013104	4.8298	0.76264	3.79437	pc01
WBGene00008978	2.48349	0.564882	3.82505	pc01
WBGene00194641	3.1271	0.757153	3.86678	pc01
WBGene00018492	4.22883	1.30114	4.14326	pc01
WBGene00003008	3.18601	0.552171	4.16789	pc01
WBGene00003765	6.64589	1.17101	4.21068	pc01
WBGene00000988	6.63796	0.509979	4.28495	pc01
WBGene00044348	1.20374	0.537745	4.46204	pc01
WBGene00017537	3.79233	0.65317	4.48382	pc01
WBGene00008969	3.37148	0.605386	4.53159	pc01
WBGene00016003	1.85932	0.787537	4.73234	pc01
WBGene00012597	2.18594	0.853922	4.93396	pc01
WBGene00018303	5.99434	1.04057	5.01302	pc01
WBGene00011452	1.94004	0.929434	5.05823	pc01
WBGene00016683	2.83377	1.49249	5.1683	pc01
WBGene00013900	0.719497	0.690661	5.17534	pc01
WBGene00012007	4.96604	0.86169	5.2833	pc01
WBGene00009434	3.88334	0.526302	5.42605	pc01
WBGene00001620	7.13414	0.55107	5.64862	pc01
WBGene00010539	6.61119	0.95022	5.89643	pc01
WBGene00002266	6.54815	0.601607	6.02328	pc01
WBGene00016868	1.47909	0.673311	6.47039	pc01
WBGene00016660	0.0655595	0.599356	6.49834	pc01
WBGene00013946	3.72145	1.1593	6.60438	pc01
WBGene00303013	1.93218	0.952248	6.75057	pc01
WBGene00013448	4.12431	0.562482	6.76062	pc01
WBGene00003606	3.17239	0.767724	6.83107	pc01
WBGene00011699	1.11613	0.831103	6.90939	pc01
WBGene00010472	3.0656	0.735921	6.95096	pc01
WBGene00000017	4.39184	1.14677	7.05145	pc01
WBGene00012750	0.857262	0.928724	7.15717	pc01
WBGene00000233	3.58913	0.554832	7.25806	pc01
WBGene00017194	1.20421	0.671283	7.56725	pc01
WBGene00016499	2.40333	0.500183	7.58707	pc01
WBGene00016914	2.73194	1.08094	8.07477	pc01
WBGene00012757	2.45152	0.889547	8.29034	pc01
WBGene00009239	0.635827	0.737552	8.34824	pc01
WBGene00020737	1.04535	0.584577	8.53633	pc01
WBGene00003729	2.21805	0.773005	8.59339	pc01
WBGene00022125	4.37163	0.576039	8.85117	pc01
WBGene00006686	3.14479	0.553719	8.89326	pc01
WBGene00044382	0.619255	0.775376	9.0257	pc01
WBGene00006351	6.15735	0.526999	9.0616	pc01
WBGene00020891	4.79055	0.934456	9.16064	pc01
WBGene00018257	4.4701	0.723807	9.40768	pc01
WBGene00015896	1.78575	0.89572	9.5368	pc01
WBGene00019540	8.14886	1.20407	9.61837	pc01
WBGene00004358	6.45733	0.961555	9.94624	pc01
WBGene00007203	2.36965	0.722338	10.1584	pc01
WBGene00009241	3.98278	0.988985	10.3657	pc01
WBGene00003863	-0.10756	0.526051	10.5795	pc01
WBGene00045403	2.00484	1.10814	10.6486	pc01
WBGene00010595	4.82629	0.886642	10.6874	pc01
WBGene00009710	1.09767	0.695544	11.8368	pc01
WBGene00001478	3.46542	0.672757	11.9522	pc01
WBGene00017506	8.14174	0.894279	12.0913	pc01
WBGene00016911	3.61336	0.542172	12.2056	pc01
WBGene00016520	1.01526	0.601652	12.4456	pc01
WBGene00002270	1.67165	0.573683	12.4665	pc01
WBGene00022245	5.96732	1.21339	12.5061	pc01
WBGene00235095	0.378743	0.629777	12.6935	pc01
WBGene00004144	3.69589	1.42809	12.8603	pc01
WBGene00008040	4.46755	0.513237	12.8859	pc01
WBGene00018142	0.282392	0.564425	12.9691	pc01
WBGene00012883	1.74961	1.33485	12.971	pc01
WBGene00001820	3.7959	0.560961	13.095	pc01
WBGene00016360	1.16391	1.11818	13.3132	pc01
WBGene00016663	3.70796	0.532951	13.3967	pc01
WBGene00017467	2.1315	0.868899	13.4164	pc01
WBGene00021396	3.22095	0.559575	13.5948	pc01
WBGene00016594	7.34607	0.598793	13.6129	pc01
WBGene00015993	1.08708	0.584359	13.6179	pc01
WBGene00077693	5.79226	0.661919	13.7938	pc01
WBGene00000246	2.88109	0.617511	14.0848	pc01
WBGene00012428	4.052	0.828645	14.196	pc01
WBGene00016522	2.75624	0.695772	14.2289	pc01
WBGene00019064	4.72907	0.747309	14.624	pc01
WBGene00012439	4.41103	0.788608	14.8781	pc01
WBGene00022440	0.167547	0.757951	15.0723	pc01
WBGene00008084	1.03827	0.723503	15.5549	pc01
WBGene00004256	4.33294	0.560042	15.8529	pc01
WBGene00015196	3.71985	1.1617	15.8747	pc01
WBGene00000968	3.9239	0.548183	16.0694	pc01
WBGene00000061	1.3943	0.88722	18.6314	pc01
WBGene00020052	4.56622	0.739481	18.6459	pc01
WBGene00017340	5.16363	0.707056	18.6744	pc01
WBGene00009212	0.359337	0.548548	18.8432	pc01
WBGene00007439	0.838457	0.743166	19.2993	pc01
WBGene00016403	3.23756	1.09609	19.3192	pc01
WBGene00000731	0.524217	0.647666	19.6907	pc01
WBGene00009865	2.60569	0.67739	19.7583	pc01
WBGene00012118	5.2211	0.572179	19.8205	pc01
WBGene00016295	1.22282	0.844883	20.0786	pc01
WBGene00022662	0.876297	0.682486	20.2581	pc01
WBGene00007200	3.79727	1.14397	20.9015	pc01
WBGene00007204	0.583592	0.562311	21.0056	pc01
WBGene00008592	-0.0833811	0.567022	21.4322	pc01
WBGene00021178	2.22178	0.730527	21.4794	pc01
WBGene00013587	3.53455	0.581274	21.6327	pc01
WBGene00016264	5.71389	0.679773	21.7189	pc01
WBGene00012444	4.89458	0.775167	21.9491	pc01
WBGene00009787	9.01123	1.2681	22.4271	pc01
WBGene00015434	3.82632	0.855709	22.5644	pc01
WBGene00012123	3.24994	1.37587	23.2895	pc01
WBGene00194803	0.586125	0.792888	23.6932	pc01
WBGene00017660	0.842891	0.991419	24.5704	pc01
WBGene00015152	1.13053	0.537618	25.0603	pc01
WBGene00008616	1.32921	0.950968	25.1537	pc01
WBGene00019819	6.32542	0.524858	25.394	pc01
WBGene00000677	6.81678	1.39474	25.7048	pc01
WBGene00206381	0.105078	0.566957	25.8149	pc01
WBGene00014699	-0.439939	0.606949	25.8165	pc01
WBGene00010251	4.19162	0.552481	26.4187	pc01
WBGene00016657	3.475	0.665614	26.5602	pc01
WBGene00016199	-0.117219	0.581603	26.5897	pc01
WBGene00010658	3.36235	0.600772	26.6136	pc01
WBGene00016119	2.95932	0.941707	26.6429	pc01
WBGene00003567	6.89634	0.565167	26.8009	pc01
WBGene00016023	3.2226	0.710551	26.9401	pc01
WBGene00000673	6.63869	1.55612	27.0342	pc01
WBGene00016088	0.344359	0.595839	27.0941	pc01
WBGene00011394	1.22951	0.710872	27.3624	pc01
WBGene00021492	2.24761	0.734705	27.6153	pc01
WBGene00000115	6.50112	0.530932	27.6474	pc01
WBGene00008739	2.78644	0.590361	27.7243	pc01
WBGene00022416	2.22633	0.859494	27.8088	pc01
WBGene00019654	0.844419	0.926692	28.2873	pc01
WBGene00003675	3.60324	0.506572	28.6935	pc01
WBGene00016644	4.69684	0.655354	28.9202	pc01
WBGene00016996	4.05846	1.01593	29.1122	pc01
WBGene00020912	2.28218	0.677517	29.3642	pc01
WBGene00010422	3.41254	1.042	29.4056	pc01
WBGene00001821	2.77226	0.549434	29.4404	pc01
WBGene00001767	0.755344	0.597019	30.5982	pc02
WBGene00020977	0.94636	0.739046	30.627	pc02
WBGene00011698	1.45432	0.921331	31.338	pc02
WBGene00009476	3.49845	0.541056	31.4561	pc02
WBGene00007402	4.08614	0.70859	31.7609	pc02
WBGene00007835	0.0788458	0.520173	32.0883	pc02
WBGene00000022	4.0222	0.667346	32.3774	pc02
WBGene00011074	1.04714	0.63097	32.8226	pc02
WBGene00000784	9.17691	0.802906	32.876	pc02
WBGene00010501	1.57773	0.664859	33.0185	pc02
WBGene00008841	6.13738	0.795404	33.0646	pc02
WBGene00007240	4.47924	1.6305	33.4155	pc02
WBGene00194883	2.3509	0.594791	34.2968	pc02
WBGene00001768	5.07277	0.552111	34.9765	pc02
WBGene00019885	0.895729	0.623306	35.1939	pc02
WBGene00016664	4.75954	0.65429	35.4093	pc02
WBGene00007599	2.73091	0.904795	35.5734	pc02
WBGene00002348	7.00441	0.590302	35.7108	pc02
WBGene00010019	2.48101	0.718935	35.7467	pc02
WBGene00008323	0.51302	0.634597	35.7628	pc02
WBGene00001852	1.77529	0.516135	35.7785	pc02
WBGene00017426	5.69329	0.907031	35.941	pc02
WBGene00017201	6.69221	1.03103	36.1317	pc02
WBGene00000556	2.33623	0.827969	36.3318	pc02
WBGene00000038	1.40547	0.651668	36.3757	pc02
WBGene00000528	5.1988	0.549807	36.5646	pc02
WBGene00044260	5.69306	0.868143	36.7759	pc02
WBGene00021743	1.17375	0.961114	36.7942	pc02
WBGene00013489	7.17072	1.46841	36.9036	pc02
WBGene00019312	0.883094	0.736084	37.3915	pc02
WBGene00045411	4.2248	1.05336	37.4193	pc02
WBGene00010497	2.62176	0.580769	37.6461	pc02
WBGene00017333	1.82034	0.651465	37.8605	pc02
WBGene00021858	0.617021	0.567774	38.0725	pc02
WBGene00015402	2.67214	0.787109	38.0753	pc02
WBGene00019187	0.933659	0.567114	38.0945	pc02
WBGene00017364	2.86471	0.701033	38.1477	pc02
WBGene00013975	1.50543	0.637316	38.3182	pc02
WBGene00017335	1.96403	0.502049	38.3503	pc02
WBGene00017247	4.01148	0.819284	38.4945	pc02
WBGene00044901	3.51996	0.743655	38.753	pc02
WBGene00021529	4.06157	1.1637	39.1485	pc02
WBGene00019908	3.67576	0.791536	39.5525	pc02
WBGene00010799	0.837944	0.515209	39.6063	pc02
WBGene00008490	2.5306	0.718425	39.7473	pc02
WBGene00021121	1.53526	0.524151	39.9669	pc02
WBGene00010727	7.27197	0.755666	40.0106	pc02
WBGene00011190	1.93245	0.769006	40.5325	pc02
WBGene00011398	6.84683	0.799064	41.0329	pc02
WBGene00017329	3.04134	0.795764	41.1675	pc02
WBGene00001251	5.27092	0.518067	41.2366	pc02
WBGene00010242	1.04241	0.552324	41.4582	pc02
WBGene00008963	6.40546	1.34686	41.5251	pc02
WBGene00019329	4.14219	0.662704	41.827	pc02
WBGene00012941	1.80502	0.680202	41.9222	pc02
WBGene00219410	0.888647	1.20694	41.9885	pc02
WBGene00008792	-0.24396	0.574232	42.073	pc02
WBGene00001068	5.4025	1.44158	42.1397	pc02
WBGene00017658	6.69317	0.558084	42.1713	pc02
WBGene00003514	7.23647	0.631967	42.2368	pc02
WBGene00018217	5.54683	0.877595	42.2613	pc02
WBGene00017959	0.221599	0.681632	42.2883	pc02
WBGene00013404	0.874344	0.67351	42.422	pc02
WBGene00045494	1.56949	1.04836	42.4935	pc02
WBGene00006642	2.24421	0.760335	42.5754	pc02
WBGene00009343	2.16523	1.18566	42.6806	pc02
WBGene00011417	3.10436	0.82639	42.7474	pc02
WBGene00011420	3.10436	0.82639	42.7474	pc02
WBGene00003731	4.18405	0.516163	42.8078	pc02
WBGene00007765	1.5966	0.732266	42.8811	pc02
WBGene00018744	6.4104	0.654688	43.0511	pc02
WBGene00011285	3.16465	1.00072	43.3551	pc02
WBGene00009715	2.89848	0.60448	43.3877	pc02
WBGene00001396	7.81473	0.500441	43.4047	pc02
WBGene00012424	2.77342	0.637122	43.4184	pc02
WBGene00000722	7.07628	2.08783	43.4307	pc02
WBGene00000990	4.89359	1.12062	43.686	pc02
WBGene00015047	5.52989	0.510458	43.9371	pc02
WBGene00015999	0.178729	0.678388	43.9372	pc02
WBGene00012545	5.35501	1.25348	44.037	pc02
WBGene00008333	3.02731	0.803682	44.1616	pc02
WBGene00021247	3.65752	1.02972	44.3329	pc02
WBGene00015138	2.92587	0.61437	44.631	pc02
WBGene00002827	5.2636	1.17848	44.6959	pc02
WBGene00009073	0.0647329	0.532451	44.7232	pc02
WBGene00012961	2.01175	0.513075	44.7396	pc02
WBGene00045246	4.37031	1.15055	44.7945	pc02
WBGene00009896	6.24293	0.745598	44.8235	pc02
WBGene00018576	3.33074	0.506252	44.8744	pc02
WBGene00017331	1.6829	1.02757	45.1689	pc02
WBGene00017367	1.37793	0.527135	45.3364	pc02
WBGene00016018	6.3805	0.598748	45.3638	pc02
WBGene00011672	2.56301	0.832104	45.4296	pc02
WBGene00020276	1.11274	0.514673	45.506	pc02
WBGene00219423	1.69142	0.792771	45.6906	pc02
WBGene00010902	4.95898	0.575296	45.8915	pc02
WBGene00019108	2.73828	0.537214	45.998	pc02
WBGene00019268	4.13844	0.964521	46.0167	pc02
WBGene00010317	8.68258	0.613252	46.2246	pc02
WBGene00015865	3.82356	1.23298	46.3424	pc02
WBGene00271812	1.56417	0.756365	46.3686	pc02
WBGene00000016	3.60863	1.23889	46.5989	pc02
WBGene00001389	4.50605	0.816339	46.7849	pc02
WBGene00009237	6.84575	0.529406	46.8618	pc02
WBGene00007056	3.78721	0.642993	46.9033	pc02
WBGene00020691	2.54224	0.524454	46.9145	pc02
WBGene00017154	4.45334	1.4439	47.0942	pc02
WBGene00009404	2.59986	0.583303	47.2792	pc02
WBGene00008335	3.27762	0.556286	47.4132	pc02
WBGene00009340	6.25171	0.887344	47.8909	pc02
WBGene00000749	4.2764	1.29131	48.1305	pc02
WBGene00007479	6.12193	1.12652	48.1856	pc02
WBGene00004157	3.47277	0.578444	48.4948	pc02
WBGene00003977	0.0051021	0.61586	48.5369	pc02
WBGene00019476	3.7383	0.847169	48.6354	pc02
WBGene00008389	0.478223	0.551	48.7112	pc02
WBGene00009383	4.79317	1.30479	48.7631	pc02
WBGene00006367	5.6427	0.839742	48.8459	pc02
WBGene00017654	0.152653	0.542841	49.0682	pc02
WBGene00022445	0.969798	0.668198	49.3063	pc02
WBGene00023420	2.91513	0.516907	49.3548	pc02
WBGene00012295	1.69541	0.513195	49.6996	pc02
WBGene00011286	2.92645	0.909228	49.7131	pc02
WBGene00017184	4.84474	0.513564	49.7826	pc02
WBGene00000136	4.64577	0.711939	49.8979	pc02
WBGene00020139	6.80022	0.554864	49.9878	pc02
WBGene00000287	2.80942	0.625407	49.9903	pc02
WBGene00007231	2.83294	1.6184	50.1034	pc02
WBGene00017022	1.61835	0.65004	50.3459	pc02
WBGene00011694	5.42408	0.872413	50.518	pc02
WBGene00011879	3.37468	0.594655	50.8361	pc02
WBGene00003019	5.52552	0.546019	51.0623	pc02
WBGene00001772	5.14999	0.75869	51.0906	pc02
WBGene00006533	4.60559	0.645175	51.1358	pc02
WBGene00021335	7.36562	0.544409	51.1846	pc02
WBGene00007321	2.72664	0.52369	51.4221	pc02
WBGene00019426	2.64859	0.53789	51.687	pc02
WBGene00000978	3.08523	0.652435	51.9129	pc02
WBGene00013037	5.15217	0.658319	51.931	pc02
WBGene00021171	3.15395	0.847472	52.423	pc02
WBGene00001107	1.39159	0.99335	52.6998	pc02
WBGene00044772	3.2594	1.24347	52.9764	pc02
WBGene00185005	0.650658	0.559403	53.2144	pc02
WBGene00015752	7.3743	0.625631	53.217	pc02
WBGene00011140	0.118723	0.524531	53.4023	pc02
WBGene00018418	6.18507	0.964529	53.4204	pc02
WBGene00022816	4.98044	1.55211	53.6966	pc02
WBGene00010630	3.23307	0.74224	53.8434	pc02
WBGene00000523	3.62698	0.525776	53.9008	pc02
WBGene00010370	5.41597	0.779709	53.9129	pc02
WBGene00021245	2.8022	0.678451	54.2041	pc02
WBGene00007233	3.63311	1.34386	54.4503	pc02
WBGene00000972	1.61207	0.932623	54.4899	pc02
WBGene00019288	1.2747	0.812238	54.9255	pc02
WBGene00006366	7.9521	1.32492	54.9295	pc02
WBGene00021066	1.45219	0.530658	55.8494	pc02
WBGene00015396	1.95457	0.682881	56.5404	pc02
WBGene00206417	0.977424	0.918374	56.6513	pc02
WBGene00019074	4.7759	0.635392	56.7496	pc02
WBGene00007367	1.82218	0.649731	56.7781	pc02
WBGene00008028	4.36661	0.783679	57.6892	pc02
WBGene00007482	3.01769	1.0235	57.7297	pc02
WBGene00007232	3.10154	1.62612	58.0529	pc02
WBGene00008390	2.61134	0.881117	58.1779	pc02
WBGene00016788	2.98463	0.772551	58.3467	pc02
WBGene00013884	5.63988	0.510311	58.3942	pc02
WBGene00009288	3.58989	0.631195	59.099	pc02
WBGene00006464	2.13722	0.547811	59.5001	pc02
WBGene00008229	4.58389	0.928941	59.7554	pc02
WBGene00000399	4.58304	1.33628	60.5072	pc03
WBGene00018200	2.42395	0.500978	60.7243	pc03
WBGene00001760	2.82626	1.05028	60.8462	pc03
WBGene00019882	5.06574	0.635638	61.1683	pc03
WBGene00011894	3.11709	1.02301	61.4399	pc03
WBGene00003485	7.39307	0.648325	61.9657	pc03
WBGene00007736	4.86451	0.578665	62.2558	pc03
WBGene00019855	5.22724	0.509171	62.4115	pc03
WBGene00018480	0.455059	0.575118	62.7159	pc03
WBGene00044719	1.60907	0.769902	63.2368	pc03
WBGene00015076	1.90002	0.654908	63.7959	pc03
WBGene00013820	1.13432	0.876559	64.1923	pc03
WBGene00016613	1.94445	0.618487	64.8092	pc03
WBGene00019438	1.88604	0.575735	64.9698	pc03
WBGene00016355	4.41768	0.51404	65.1307	pc03
WBGene00044350	3.72989	0.806164	65.722	pc03
WBGene00044658	1.76032	1.26968	66.1936	pc03
WBGene00011418	4.78932	0.558009	66.2147	pc03
WBGene00017690	1.09487	0.723439	67.5758	pc03
WBGene00010738	6.87983	0.872879	67.6961	pc03
WBGene00001763	1.89286	0.626511	67.8904	pc03
WBGene00008625	1.16895	0.686854	68.1232	pc03
WBGene00017390	2.63653	0.824317	68.2938	pc03
WBGene00000402	5.14372	1.23619	68.3532	pc03
WBGene00015757	-0.242504	0.622946	69.1738	pc03
WBGene00001750	1.18359	0.729731	69.5645	pc03
WBGene00001159	4.37002	0.642604	69.6004	pc03
WBGene00015758	1.02417	1.15382	69.798	pc03
WBGene00021731	1.44545	0.660536	69.9902	pc03
WBGene00019080	0.498362	0.733144	70.1163	pc03
WBGene00020501	4.04022	1.01478	70.8407	pc03
WBGene00015298	6.08494	1.0885	71.2402	pc03
WBGene00012783	3.2904	0.850693	72.1833	pc03
WBGene00001432	2.52742	0.751362	72.5223	pc03
WBGene00012175	1.41993	0.839227	72.5873	pc03
WBGene00206464	1.11111	0.733269	72.7474	pc03
WBGene00009339	0.232316	0.841443	72.8975	pc03
WBGene00000992	5.02597	0.93336	72.9674	pc03
WBGene00006636	4.72052	0.547446	73.9022	pc03
WBGene00010027	0.577952	0.747961	74.2344	pc03
WBGene00017751	1.8634	0.543242	74.2686	pc03
WBGene00021976	3.33596	1.50251	74.2757	pc03
WBGene00001076	2.15012	0.670158	75.3866	pc03
WBGene00007150	4.4365	0.941827	75.6288	pc03
WBGene00020658	5.42574	0.559708	75.8028	pc03
WBGene00008042	3.36149	0.553826	76.0442	pc03
WBGene00016749	7.72961	0.8759	77.6646	pc03
WBGene00015019	3.07608	1.44267	77.9848	pc03
WBGene00010204	9.08018	0.689064	78.9299	pc03
WBGene00020104	5.09597	0.944134	78.9584	pc03
WBGene00019962	3.98221	0.660292	79.0113	pc03
WBGene00020487	2.28955	1.24297	79.6132	pc03
WBGene00008027	3.29558	0.96816	79.6208	pc03
WBGene00008762	4.08972	1.00739	81.6004	pc03
WBGene00002282	5.18579	1.22386	82.133	pc03
WBGene00022629	5.73393	0.503273	82.4265	pc03
WBGene00014189	3.8865	0.93405	83.0936	pc03
WBGene00013543	4.66731	0.516091	83.2087	pc03
WBGene00009608	1.89997	1.27217	84.0706	pc03
WBGene00219278	0.145565	0.5335	84.1233	pc03
WBGene00045379	2.51347	1.31405	84.2044	pc03
WBGene00019648	0.890843	0.68437	85.298	pc03
WBGene00012396	3.24015	0.504639	85.3837	pc03
WBGene00003237	2.88584	0.551216	85.4093	pc03
WBGene00021963	3.51552	0.988843	85.5495	pc03
WBGene00003622	4.83487	0.930437	86.4147	pc03
WBGene00044617	1.88622	1.17043	86.436	pc03
WBGene00004052	0.613588	0.717674	86.8641	pc03
WBGene00003573	2.6952	0.881664	87.094	pc03
WBGene00016927	1.9027	0.845933	87.875	pc03
WBGene00013079	6.22118	0.945677	88.1492	pc03
WBGene00015523	3.14743	1.03477	88.4651	pc03
WBGene00003438	-0.228759	0.527942	88.523	pc03
WBGene00012165	2.16513	1.36054	89.4095	pc03
WBGene00044756	2.00767	0.591645	89.7759	pc03
WBGene00003915	6.94049	0.563012	90.498	pc04
WBGene00022146	6.36249	1.10413	90.51	pc04
WBGene00014254	2.26246	0.795752	90.6077	pc04
WBGene00044436	-0.101957	0.556348	90.8702	pc04
WBGene00018275	4.76454	0.681009	91.5166	pc04
WBGene00077593	0.712931	0.59857	91.9547	pc04
WBGene00018515	3.95061	0.711486	92.0028	pc04
WBGene00044491	-0.418286	0.528773	92.0298	pc04
WBGene00003968	4.34516	0.997801	92.351	pc04
WBGene00015795	4.91791	1.44888	92.7134	pc04
WBGene00011838	5.21263	0.610029	92.7386	pc04
WBGene00004025	6.34383	0.751691	93.2234	pc04
WBGene00006956	7.87576	1.50412	93.62	pc04
WBGene00015135	2.89963	0.622063	94.0945	pc04
WBGene00015348	-0.224263	0.530724	94.4922	pc04
WBGene00206533	0.451942	0.799411	94.6869	pc04
WBGene00000969	5.60742	0.616326	95.2564	pc04
WBGene00007214	4.6495	0.699461	95.4503	pc04
WBGene00001430	7.3306	1.11786	95.4699	pc04
WBGene00018656	7.06102	1.03415	95.5267	pc04
WBGene00219208	5.27969	1.45495	95.5936	pc04
WBGene00007450	2.78961	0.586626	95.6499	pc04
WBGene00010893	2.7412	0.874831	95.6685	pc04
WBGene00021082	2.70263	0.540728	95.8656	pc04
WBGene00012265	0.344809	0.557889	95.893	pc04
WBGene00005131	2.01773	0.811505	95.8965	pc04
WBGene00044797	2.8571	0.680513	96.4477	pc04
WBGene00011070	3.88878	0.639024	96.4537	pc04
WBGene00013744	0.254589	0.508801	96.7208	pc04
WBGene00001045	5.38431	0.729174	96.833	pc04
WBGene00020083	5.37563	1.33084	96.952	pc04
WBGene00001079	4.03583	0.685027	97.2397	pc04
WBGene00010621	4.55115	0.929179	97.2837	pc04
WBGene00008712	4.27605	1.55794	97.2977	pc04
WBGene00012255	7.48383	1.31431	97.37	pc04
WBGene00007895	0.732109	0.653732	97.4928	pc04
WBGene00018928	4.4612	0.59824	97.6769	pc04
WBGene00000272	2.60271	0.66308	97.7321	pc04
WBGene00002393	4.06102	1.18122	97.7501	pc04
WBGene00014052	3.69568	1.08006	97.7902	pc04
WBGene00002198	1.71665	0.593923	97.9323	pc04
WBGene00044631	3.36209	0.983296	97.9904	pc04
WBGene00016422	8.34446	1.3213	99.186	pc04
WBGene00009926	8.49786	1.27466	99.1954	pc04
WBGene00008763	2.62839	0.67748	99.3358	pc04
WBGene00001636	4.012	0.632881	99.4368	pc04
WBGene00008964	4.74115	1.35301	99.437	pc04
WBGene00008511	3.32734	1.11505	99.486	pc04
WBGene00012261	8.26408	1.47594	99.5971	pc04
WBGene00020465	3.04585	1.45004	99.7917	pc04
WBGene00012186	6.88371	1.36625	99.9604	pc04
WBGene00019198	3.96729	1.01023	99.9975	pc04
WBGene00003663	4.8726	0.928711	100.02	pc04
WBGene00001077	7.04232	0.587687	100.586	pc04
WBGene00015216	3.16418	0.612649	100.816	pc04
WBGene00015268	2.83337	0.974567	101.055	pc04
WBGene00015510	6.08242	0.876314	101.102	pc04
WBGene00000624	3.40414	1.56225	101.183	pc04
WBGene00022003	0.171583	0.581181	101.209	pc04
WBGene00000928	9.35467	1.57603	101.593	pc04
WBGene00000623	4.75827	1.48192	101.694	pc04
WBGene00012628	4.58027	0.910369	101.819	pc04
WBGene00020911	4.64407	0.827422	101.918	pc04
WBGene00009108	2.16461	1.58118	101.924	pc04
WBGene00001073	8.28908	0.75052	101.961	pc04
WBGene00009683	-0.111038	0.551983	102.097	pc04
WBGene00012363	4.02165	0.532259	102.114	pc04
WBGene00012257	7.6837	1.52235	102.21	pc04
WBGene00003963	10.8719	0.568718	102.226	pc04
WBGene00022591	6.56511	1.20069	102.742	pc04
WBGene00001071	7.63111	1.51562	103.058	pc04
WBGene00003482	5.98048	0.823086	103.086	pc04
WBGene00077538	0.278157	0.777317	103.178	pc04
WBGene00022236	3.94183	0.76531	103.237	pc04
WBGene00206529	1.34411	1.02796	103.276	pc04
WBGene00000702	4.94337	1.60268	103.514	pc04
WBGene00012796	4.95597	0.780264	103.59	pc04
WBGene00019973	3.35059	0.78186	103.784	pc04
WBGene00013693	3.56343	0.69636	103.849	pc04
WBGene00019197	1.0625	0.529927	104.046	pc04
WBGene00004134	6.92258	0.587678	104.061	pc04
WBGene00016180	4.56644	0.951616	104.497	pc04
WBGene00000726	4.22243	1.21892	104.63	pc04
WBGene00001072	7.37823	1.57231	104.881	pc04
WBGene00021008	2.22067	0.878566	104.931	pc04
WBGene00023416	3.72445	0.963155	105.458	pc04
WBGene00011546	1.62275	0.531004	105.607	pc04
WBGene00302993	6.76034	1.43018	105.75	pc04
WBGene00014186	5.81762	0.676972	106.501	pc04
WBGene00020484	1.47835	1.30028	106.548	pc04
WBGene00021526	1.71187	1.11991	108.039	pc04
WBGene00003553	5.67982	1.42813	108.325	pc04
WBGene00017535	4.40892	1.45531	108.996	pc04
WBGene00019021	4.50344	1.22726	109.223	pc04
WBGene00017308	-0.140081	0.597536	109.934	pc04
WBGene00235332	0.513386	0.783395	110.582	pc04
WBGene00003055	6.85649	0.521342	110.643	pc04
WBGene00003664	5.84446	0.659674	110.7	pc04
WBGene00022415	7.10847	1.54251	110.857	pc04
WBGene00009371	3.77731	1.04435	110.991	pc04
WBGene00013103	4.02127	0.788069	111.616	pc04
WBGene00011846	0.885911	0.515113	112.017	pc04
WBGene00021919	1.16009	0.671399	112.085	pc04
WBGene00012648	5.83925	0.728861	112.135	pc04
WBGene00018510	4.29295	0.95505	112.227	pc04
WBGene00000882	6.99494	1.10834	113.04	pc04
WBGene00013849	2.27861	1.27799	113.159	pc04
WBGene00016429	2.96565	1.27299	113.624	pc04
WBGene00002051	2.16923	0.610594	113.783	pc04
WBGene00018738	3.48594	0.742159	114.367	pc04
WBGene00003473	1.84238	0.993377	115.243	pc04
WBGene00020550	5.59664	1.54411	115.401	pc04
WBGene00007925	5.42699	0.8086	115.511	pc04
WBGene00019751	3.62298	0.589132	115.745	pc04
WBGene00006534	4.93571	1.16487	116.15	pc04
WBGene00012256	7.56617	1.36676	116.67	pc04
WBGene00021850	4.72722	1.20892	116.741	pc04
WBGene00009818	7.4872	0.648765	116.878	pc04
WBGene00020704	3.31701	1.11707	117.037	pc04
WBGene00017570	2.32126	0.878337	117.418	pc04
WBGene00000039	7.35104	1.17944	118.199	pc04
WBGene00003681	4.91797	0.793558	118.831	pc04
WBGene00008743	4.33038	1.14347	119.274	pc04
WBGene00010327	2.60711	0.586206	119.351	pc04
WBGene00007994	3.05398	1.00973	119.396	pc04
WBGene00014057	3.55123	0.851076	119.884	pc04
WBGene00007229	0.228377	0.510184	120.071	pc05
WBGene00007938	5.03983	1.50983	120.18	pc05
WBGene00012621	0.385497	0.669062	120.457	pc05
WBGene00008292	3.41142	1.18031	120.481	pc05
WBGene00004224	4.13798	1.24903	120.633	pc05
WBGene00019212	5.48277	0.716633	120.643	pc05
WBGene00001069	7.68947	1.47774	120.792	pc05
WBGene00009816	3.83394	0.960229	121.438	pc05
WBGene00018289	0.749759	1.10615	121.559	pc05
WBGene00008987	5.96035	0.991466	121.763	pc05
WBGene00012156	5.45055	0.544104	122.278	pc05
WBGene00044394	2.87594	0.638892	122.591	pc05
WBGene00001065	7.65505	1.53262	122.67	pc05
WBGene00018144	4.81459	0.516377	122.769	pc05
WBGene00009311	3.23455	1.36932	122.792	pc05
WBGene00004219	6.89855	1.08382	122.861	pc05
WBGene00022612	3.47708	1.03334	123.246	pc05
WBGene00017563	5.33987	0.655319	123.463	pc05
WBGene00001064	7.76451	1.44368	123.475	pc05
WBGene00018741	1.90008	1.13655	124.021	pc05
WBGene00019760	8.42496	0.56923	124.138	pc05
WBGene00000521	2.06041	1.2796	124.248	pc05
WBGene00044618	2.45635	0.706741	124.529	pc05
WBGene00185095	0.763346	0.850392	124.571	pc05
WBGene00017429	5.64389	0.863697	124.862	pc05
WBGene00016235	7.06258	0.555579	125.317	pc05
WBGene00001070	7.73543	1.59479	125.591	pc05
WBGene00013835	2.93954	0.670157	125.957	pc05
WBGene00003107	3.5954	0.968783	126.176	pc05
WBGene00044641	2.93972	0.645465	126.546	pc05
WBGene00016319	4.49112	0.885005	126.736	pc05
WBGene00303046	5.21486	0.669518	127.06	pc05
WBGene00014235	0.649095	0.841369	127.313	pc05
WBGene00000557	5.81161	1.34108	127.417	pc05
WBGene00044074	1.93325	1.16602	127.672	pc05
WBGene00020105	2.91054	1.34031	127.7	pc05
WBGene00219449	0.840083	0.579447	127.909	pc05
WBGene00010033	3.90065	1.14654	128.302	pc05
WBGene00008180	3.37225	1.32177	128.352	pc05
WBGene00017991	5.91294	1.4916	128.537	pc05
WBGene00007375	3.74161	0.690335	128.615	pc05
WBGene00007560	6.09432	1.75151	128.757	pc05
WBGene00016386	2.46837	1.06235	128.856	pc05
WBGene00012046	1.06942	1.27885	129.166	pc05
WBGene00044198	0.737573	0.901006	129.351	pc05
WBGene00022103	5.44879	1.39409	129.482	pc05
WBGene00019285	4.42895	1.11151	130.445	pc05
WBGene00012939	4.58356	0.900859	130.686	pc05
WBGene00019148	6.0273	1.45773	130.726	pc05
WBGene00020194	6.52317	1.36001	131.071	pc05
WBGene00017611	-0.328331	0.669179	131.209	pc05
WBGene00019520	5.97752	1.54347	131.657	pc05
WBGene00019318	5.26408	1.27629	132.025	pc05
WBGene00020702	3.44541	1.06778	132.619	pc05
WBGene00012540	5.88236	1.67298	132.699	pc05
WBGene00011407	4.23688	0.53612	132.744	pc05
WBGene00003703	4.09304	0.673529	132.77	pc05
WBGene00020418	3.26609	0.652819	133.063	pc05
WBGene00000005	3.37779	0.661284	133.168	pc05
WBGene00018873	0.482451	0.810891	133.177	pc05
WBGene00005611	0.202978	0.633159	133.749	pc05
WBGene00044463	4.69392	0.796413	134.357	pc05
WBGene00008509	4.06594	0.583737	134.592	pc05
WBGene00014006	5.76518	0.565566	135.407	pc05
WBGene00017483	6.26269	1.84626	135.752	pc05
WBGene00009026	2.43839	0.564639	136.172	pc05
WBGene00017577	3.24312	1.50831	136.836	pc05
WBGene00000979	3.35629	0.843693	138.139	pc05
WBGene00011238	1.96941	0.695555	139.26	pc05
WBGene00009438	2.25855	1.08542	140.604	pc05
WBGene00271777	0.667842	0.680157	140.848	pc05
WBGene00013484	1.69558	0.518088	141.069	pc05
WBGene00015400	6.07626	0.729441	141.38	pc05
WBGene00018215	4.57681	0.935535	141.383	pc05
WBGene00011821	4.8243	0.515047	141.434	pc05
WBGene00016957	6.36879	0.707463	141.475	pc05
WBGene00020785	0.605619	0.850709	141.599	pc05
WBGene00016094	2.50403	0.534429	141.712	pc05
WBGene00019653	2.92586	0.852977	141.735	pc05
WBGene00007177	3.65638	1.51915	141.854	pc05
WBGene00015399	1.91268	0.697901	141.981	pc05
WBGene00015622	2.59109	0.929915	143.012	pc05
WBGene00018682	6.54549	0.761483	143.29	pc05
WBGene00016329	4.04423	1.6641	143.598	pc05
WBGene00255714	2.56834	0.74491	144.211	pc05
WBGene00006947	6.88219	1.68358	144.215	pc05
WBGene00013585	5.03644	0.94466	144.383	pc05
WBGene00011833	5.33209	0.628702	144.716	pc05
WBGene00019486	1.93603	0.919951	144.888	pc05
WBGene00010321	4.7282	1.12596	144.912	pc05
WBGene00020648	1.65259	1.01968	144.931	pc05
WBGene00011665	2.478	1.10487	144.999	pc05
WBGene00003071	5.70487	0.698397	145.163	pc05
WBGene00016029	2.90009	1.33742	146.111	pc05
WBGene00012866	3.28871	0.552719	146.192	pc05
WBGene00195183	0.488659	0.616611	146.554	pc05
WBGene00020728	0.737788	0.684063	146.598	pc05
WBGene00017530	3.23573	0.622347	146.625	pc05
WBGene00020855	3.81824	0.685947	146.734	pc05
WBGene00020561	8.12563	0.896695	146.984	pc05
WBGene00001150	1.04786	0.677826	147.205	pc05
WBGene00001570	6.17824	0.717375	147.245	pc05
WBGene00004229	3.49653	0.720147	147.438	pc05
WBGene00013263	8.8247	0.902194	147.445	pc05
WBGene00007170	3.55626	1.22786	147.453	pc05
WBGene00018174	5.08341	0.729924	147.652	pc05
WBGene00021931	3.64401	1.21589	147.753	pc05
WBGene00018173	1.07914	0.519607	147.873	pc05
WBGene00044043	4.48202	0.886274	147.9	pc05
WBGene00006948	6.58185	1.61408	148.269	pc05
WBGene00044445	5.65421	1.24505	148.649	pc05
WBGene00018547	2.43751	1.16088	148.857	pc05
WBGene00009891	1.28792	1.34326	148.909	pc05
WBGene00006666	2.03101	0.600013	149.146	pc05
WBGene00000705	4.37015	1.56601	149.205	pc05
WBGene00001758	8.03473	0.605061	149.309	pc05
WBGene00013559	1.68684	0.551676	149.4	pc05
WBGene00018911	7.45794	0.603921	149.485	pc05
WBGene00020366	7.25483	0.507069	149.704	pc05
WBGene00012635	4.72357	1.33155	149.758	pc05
WBGene00013852	5.55915	1.24082	149.759	pc05
WBGene00003424	-0.388021	0.55242	150.064	pc06
WBGene00001723	0.862033	0.695796	150.192	pc06
WBGene00016877	4.89399	0.731351	150.758	pc06
WBGene00007770	4.90102	0.613386	150.848	pc06
WBGene00001633	6.75464	0.639704	150.926	pc06
WBGene00018040	2.61805	1.30577	150.961	pc06
WBGene00012086	0.833669	0.673116	151.046	pc06
WBGene00000786	8.96235	0.998149	151.162	pc06
WBGene00008425	4.56208	0.633265	151.166	pc06
WBGene00044058	1.75949	0.756827	151.219	pc06
WBGene00001428	7.13319	0.907595	151.228	pc06
WBGene00019272	7.27812	1.59058	151.317	pc06
WBGene00015426	2.84903	1.39177	151.38	pc06
WBGene00018189	1.24073	0.734065	151.433	pc06
WBGene00021095	8.50602	1.01171	151.483	pc06
WBGene00019812	0.0776573	0.607561	151.728	pc06
WBGene00012271	0.959185	0.947755	151.858	pc06
WBGene00017379	3.44855	0.646754	152.078	pc06
WBGene00002037	5.00448	0.544479	152.096	pc06
WBGene00044630	4.17018	0.757958	152.178	pc06
WBGene00017560	4.9053	1.8437	152.27	pc06
WBGene00018571	1.81664	1.16296	152.351	pc06
WBGene00022274	5.53612	1.46254	152.372	pc06
WBGene00012917	4.27773	1.61197	152.658	pc06
WBGene00011877	0.521008	0.934867	152.709	pc06
WBGene00020741	2.87282	0.660599	152.788	pc06
WBGene00015781	6.8188	1.44222	152.857	pc06
WBGene00016912	4.23452	0.701744	152.875	pc06
WBGene00016133	6.8098	1.1754	152.903	pc06
WBGene00009647	0.925308	0.543444	152.933	pc06
WBGene00004259	6.86185	1.10665	152.939	pc06
WBGene00007146	3.23039	1.02987	153.079	pc06
WBGene00019473	2.49	0.776031	153.212	pc06
WBGene00017420	4.05939	1.11748	153.445	pc06
WBGene00017576	2.69211	0.973501	153.526	pc06
WBGene00019280	5.78014	0.662708	153.725	pc06
WBGene00018702	4.50651	0.529146	153.786	pc06
WBGene00008654	5.4154	0.674125	154	pc06
WBGene00018965	5.50721	1.59891	154.099	pc06
WBGene00012863	2.21917	1.74307	154.149	pc06
WBGene00009791	2.85344	1.31509	154.27	pc06
WBGene00044169	3.39106	0.781967	154.284	pc06
WBGene00020798	5.05056	0.607977	154.311	pc06
WBGene00018027	1.45746	1.62528	154.411	pc06
WBGene00011023	1.84653	0.965106	154.531	pc06
WBGene00044355	2.19874	0.883648	154.588	pc06
WBGene00011938	7.01089	1.27354	154.591	pc06
WBGene00019154	7.05199	1.4353	154.697	pc06
WBGene00004206	5.0023	0.641383	154.73	pc06
WBGene00012755	4.56775	0.57211	154.889	pc06
WBGene00019030	3.51684	0.63541	154.908	pc06
WBGene00018572	7.56705	1.07779	154.935	pc06
WBGene00017018	5.32262	1.43674	154.969	pc06
WBGene00194916	1.04528	1.03068	155.048	pc06
WBGene00020426	4.75471	0.658371	155.143	pc06
WBGene00271815	-0.194211	0.530556	155.171	pc06
WBGene00015496	2.20196	1.17633	155.244	pc06
WBGene00004264	6.99055	1.55171	155.291	pc06
WBGene00018256	3.03005	1.27708	155.383	pc06
WBGene00015336	4.32436	0.557292	155.406	pc06
WBGene00000788	8.66627	1.26797	155.412	pc06
WBGene00001242	4.60709	1.33491	155.458	pc06
WBGene00007996	4.05191	1.91902	155.494	pc06
WBGene00003888	4.34617	1.65628	155.679	pc06
WBGene00019357	5.45451	0.684155	155.82	pc06
WBGene00044059	0.313774	0.747266	155.9	pc06
WBGene00009318	1.62852	1.30226	156.058	pc06
WBGene00007174	4.83189	1.15587	156.06	pc06
WBGene00008779	1.26447	1.08489	156.096	pc06
WBGene00022517	6.07586	1.99415	156.147	pc06
WBGene00011393	5.9374	0.729321	156.264	pc06
WBGene00000778	4.30767	0.984878	156.533	pc06
WBGene00011364	4.10789	0.577616	156.585	pc06
WBGene00009227	1.75647	1.33419	156.6	pc06
WBGene00012068	1.20871	0.594695	156.642	pc06
WBGene00013906	4.14242	0.572899	156.702	pc06
WBGene00007339	4.08252	0.770248	157.032	pc06
WBGene00018133	3.88578	1.2056	157.079	pc06
WBGene00012199	3.87684	1.48746	157.131	pc06
WBGene00008605	6.82771	1.48582	157.137	pc06
WBGene00016106	5.87616	1.41778	157.138	pc06
WBGene00014150	4.35002	0.717205	157.145	pc06
WBGene00018969	7.57587	1.48385	157.204	pc06
WBGene00021123	3.17235	0.598456	157.287	pc06
WBGene00303081	-0.315091	0.510374	157.445	pc06
WBGene00013166	1.42242	0.749149	157.546	pc06
WBGene00000776	9.67687	0.78678	157.655	pc06
WBGene00011831	8.70141	0.913586	157.971	pc06
WBGene00001707	5.47677	0.826207	157.98	pc06
WBGene00000698	4.42278	1.09723	158.069	pc06
WBGene00022287	6.37319	1.37662	158.168	pc06
WBGene00022611	4.3431	1.51392	158.213	pc06
WBGene00013264	0.982781	0.926609	158.299	pc06
WBGene00012892	1.6918	0.961797	158.34	pc06
WBGene00017307	6.53773	1.77065	158.36	pc06
WBGene00013387	4.16301	0.934458	158.457	pc06
WBGene00018299	2.26605	0.924924	158.479	pc06
WBGene00009582	4.23181	0.583188	158.516	pc06
WBGene00008807	3.89982	1.58237	158.556	pc06
WBGene00013673	4.51495	1.27726	158.584	pc06
WBGene00001719	4.79034	1.45775	158.593	pc06
WBGene00006640	5.52632	0.526587	158.655	pc06
WBGene00235268	5.64807	1.54582	158.662	pc06
WBGene00044803	0.720261	0.938473	158.708	pc06
WBGene00018640	4.69944	1.67375	158.752	pc06
WBGene00000503	2.56762	0.893213	158.839	pc06
WBGene00017212	2.29024	1.13344	158.85	pc06
WBGene00020365	3.38541	1.15254	158.903	pc06
WBGene00018533	6.16307	0.63212	158.909	pc06
WBGene00012163	3.15362	0.901364	158.991	pc06
WBGene00009613	1.30318	0.981791	159.283	pc06
WBGene00017666	3.11347	1.20075	159.302	pc06
WBGene00013872	4.2334	0.682164	159.328	pc06
WBGene00017716	6.04189	1.61697	159.357	pc06
WBGene00017794	2.47231	0.751316	159.499	pc06
WBGene00019843	3.94366	0.646751	159.558	pc06
WBGene00018472	2.48814	0.764517	159.563	pc06
WBGene00015055	2.43529	0.669826	159.653	pc06
WBGene00019644	5.17666	0.96913	159.734	pc06
WBGene00000397	3.75249	1.42023	159.766	pc06
WBGene00010881	3.4029	0.861773	159.886	pc06
WBGene00022160	6.58728	1.52425	160.105	pc06
WBGene00022577	4.37096	1.25505	160.263	pc06
WBGene00018706	3.9619	1.01965	160.554	pc06
WBGene00009205	3.50391	0.982031	160.613	pc06
WBGene00235110	1.36795	1.48233	160.676	pc06
WBGene00010835	5.59624	1.63553	160.955	pc06
WBGene00044723	1.54695	0.519823	160.98	pc06
WBGene00007420	4.49342	1.52595	160.986	pc06
WBGene00020134	3.55955	0.649028	161.213	pc06
WBGene00000853	1.52543	0.942316	161.267	pc06
WBGene00000712	2.48828	1.42518	161.408	pc06
WBGene00001716	7.21212	2.11256	161.436	pc06
WBGene00005022	5.83368	0.521743	161.457	pc06
WBGene00000902	3.74169	0.955705	161.636	pc06
WBGene00011836	2.91552	0.903636	161.682	pc06
WBGene00020626	4.01436	1.14962	161.854	pc06
WBGene00017243	1.2651	0.615151	161.934	pc06
WBGene00012032	5.87555	1.67674	161.949	pc06
WBGene00010285	4.89802	1.51475	162.046	pc06
WBGene00016276	3.27927	1.28532	162.244	pc06
WBGene00003015	4.39853	0.640916	162.256	pc06
WBGene00010442	4.14235	0.969328	162.363	pc06
WBGene00000220	4.76706	1.43461	162.381	pc06
WBGene00010673	4.39697	1.82659	162.546	pc06
WBGene00001690	4.26034	1.31704	162.927	pc06
WBGene00011107	5.71863	1.65985	162.936	pc06
WBGene00003523	4.51959	1.27245	162.979	pc06
WBGene00021892	0.138689	0.586944	163.001	pc06
WBGene00001711	1.93497	1.37763	163.006	pc06
WBGene00007264	5.29673	1.70194	163.042	pc06
WBGene00000401	3.19191	0.631475	163.061	pc06
WBGene00020574	3.32811	1.07097	163.233	pc06
WBGene00010972	3.58852	0.885508	163.302	pc06
WBGene00008093	2.56167	1.24239	163.33	pc06
WBGene00004233	3.22574	1.04476	163.344	pc06
WBGene00020483	0.552496	1.06333	163.439	pc06
WBGene00007559	0.348536	1.10808	163.594	pc06
WBGene00018675	1.54982	0.702701	163.597	pc06
WBGene00022140	0.0506949	0.580214	163.638	pc06
WBGene00014184	3.60702	1.19968	163.757	pc06
WBGene00008500	3.79341	1.56741	164.081	pc06
WBGene00017937	6.23058	1.75763	164.082	pc06
WBGene00220261	3.32814	1.54166	164.131	pc06
WBGene00019832	2.2852	0.537268	164.135	pc06
WBGene00017998	6.70155	2.08945	164.389	pc06
WBGene00011762	2.98864	0.604289	164.552	pc06
WBGene00020281	4.17439	1.60303	164.673	pc06
WBGene00015153	2.61617	1.56188	164.733	pc06
WBGene00016136	2.22439	1.49842	165.127	pc06
WBGene00012222	3.61665	0.729624	165.781	pc06
WBGene00020590	2.23931	1.26531	165.822	pc06
WBGene00219294	0.924477	1.11836	165.886	pc06
WBGene00016273	2.03638	1.30962	165.979	pc06
WBGene00011078	1.64759	1.1769	166.039	pc06
WBGene00004210	6.69548	1.1468	166.481	pc06
WBGene00005652	3.50267	0.690585	166.788	pc06
WBGene00010291	5.73792	0.84385	166.905	pc06
WBGene00017485	3.22362	0.694435	167.039	pc06
WBGene00016022	4.88662	1.31652	167.235	pc06
WBGene00019609	5.09361	0.680931	167.315	pc06
WBGene00206502	3.90526	1.74238	167.638	pc06
WBGene00015300	4.57599	1.55769	167.703	pc06
WBGene00013592	2.84287	1.11254	167.819	pc06
WBGene00021939	3.59483	1.01158	167.843	pc06
WBGene00020343	3.85171	0.893483	168.075	pc06
WBGene00014188	7.21806	1.38998	168.1	pc06
WBGene00018295	2.90391	0.732241	168.367	pc06
WBGene00001727	0.962295	1.11471	168.371	pc06
WBGene00021870	5.85728	0.920065	168.395	pc06
WBGene00020846	5.73627	1.12543	168.468	pc06
WBGene00011882	1.17835	0.944887	168.657	pc06
WBGene00010010	3.16215	0.92935	168.779	pc06
WBGene00008376	5.14802	1.65463	168.897	pc06
WBGene00001721	2.32871	1.17377	168.971	pc06
WBGene00022024	5.1317	1.49184	169.098	pc06
WBGene00194915	2.27404	0.678412	169.098	pc06
WBGene00009889	4.37166	1.24262	169.114	pc06
WBGene00000422	0.182946	0.572345	169.163	pc06
WBGene00008496	5.4936	1.52901	169.256	pc06
WBGene00007949	1.78882	1.16174	169.3	pc06
WBGene00011572	0.972411	0.996115	169.355	pc06
WBGene00014182	7.26705	1.36683	169.553	pc06
WBGene00219412	1.76371	1.08558	169.593	pc06
WBGene00017476	-0.244051	0.75431	169.648	pc06
WBGene00013027	1.20923	0.713312	170.283	pc06
WBGene00000493	3.61552	1.06552	170.419	pc06
WBGene00008929	4.25331	0.814513	170.506	pc06
WBGene00012815	0.875011	0.829201	170.94	pc06
WBGene00044796	2.37313	1.55371	171.003	pc06
WBGene00007141	2.10962	0.927167	171.314	pc06
WBGene00007325	3.40695	1.58822	171.332	pc06
WBGene00050939	5.11491	1.37306	171.351	pc06
WBGene00009261	5.22207	1.97434	171.436	pc06
WBGene00018958	4.30365	0.674333	171.455	pc06
WBGene00010069	1.69222	1.18	171.967	pc06
WBGene00021403	5.51449	1.12676	172.173	pc06
WBGene00302974	7.39849	0.783853	172.238	pc06
WBGene00013457	3.7117	1.12005	172.3	pc06
WBGene00044530	4.39935	1.60887	172.329	pc06
WBGene00011796	4.79559	0.859423	172.355	pc06
WBGene00195144	1.85575	1.22344	172.389	pc06
WBGene00009094	5.60043	0.991933	172.392	pc06
WBGene00044024	1.99227	1.0353	172.565	pc06
WBGene00013965	3.32446	1.66788	172.766	pc06
WBGene00017200	-0.155592	0.541203	172.897	pc06
WBGene00016052	4.34072	0.711377	173.229	pc06
WBGene00020250	4.3596	1.21084	173.313	pc06
WBGene00011079	1.52545	1.25434	173.39	pc06
WBGene00009408	2.94751	1.26569	173.518	pc06
WBGene00019948	1.26353	1.31651	173.651	pc06
WBGene00018414	0.277655	0.782446	173.902	pc06
WBGene00007552	5.05505	0.564528	173.933	pc06
WBGene00007868	4.80381	1.76662	174.035	pc06
WBGene00009644	3.6959	0.642791	174.132	pc06
WBGene00008851	7.27936	1.72662	174.409	pc06
WBGene00008727	1.43302	1.11601	174.66	pc06
WBGene00019979	3.75287	0.705378	174.738	pc06
WBGene00044623	6.75796	1.3545	174.944	pc06
WBGene00011548	5.5663	1.92001	175.111	pc06
WBGene00000792	3.14977	0.905692	175.306	pc06
WBGene00000633	1.15414	1.05442	175.306	pc06
WBGene00017754	1.77316	0.573157	175.537	pc06
WBGene00013471	0.0699011	0.790602	175.628	pc06
WBGene00019866	1.83587	0.769794	175.649	pc06
WBGene00018300	2.98185	1.08713	175.701	pc06
WBGene00001148	5.13228	0.930579	175.714	pc06
WBGene00008277	1.74564	1.21272	175.73	pc06
WBGene00284849	2.65987	0.998468	175.798	pc06
WBGene00022504	3.34859	1.42122	175.959	pc06
WBGene00007695	3.26654	0.562269	176.248	pc06
WBGene00044138	2.85353	0.857271	176.426	pc06
WBGene00020396	4.20165	0.68143	176.753	pc06
WBGene00000497	4.16505	1.50419	176.86	pc06
WBGene00044620	4.74972	1.07112	177.194	pc06
WBGene00007755	2.50937	0.505995	177.232	pc06
WBGene00009830	1.83526	0.784159	177.259	pc06
WBGene00000893	5.17158	1.69347	177.378	pc06
WBGene00006869	3.93718	0.504331	177.44	pc06
WBGene00020282	-0.357326	0.549541	177.549	pc06
WBGene00021837	-0.0720639	0.569112	177.578	pc06
WBGene00008150	3.88573	2.01618	177.797	pc06
WBGene00044437	2.12924	1.06291	177.8	pc06
WBGene00003388	5.68338	1.25662	178.09	pc06
WBGene00015910	3.00633	1.3681	178.093	pc06
WBGene00022725	1.76844	1.07423	178.126	pc06
WBGene00018176	2.53255	1.30064	178.214	pc06
WBGene00018607	1.6101	0.673821	178.443	pc06
WBGene00008222	2.64063	0.709739	178.648	pc06
WBGene00004230	4.71029	2.16015	178.903	pc06
WBGene00004133	6.71379	1.56966	179.17	pc06
WBGene00004120	7.31788	1.87883	179.38	pc06
WBGene00002983	4.43319	1.65755	179.891	pc06
WBGene00012742	0.515459	0.749722	180.337	pc07
WBGene00016380	4.61167	0.671828	180.503	pc07
WBGene00010573	6.40285	1.54422	180.523	pc07
WBGene00019718	1.55049	0.695749	180.578	pc07
WBGene00011175	1.73807	1.28156	180.598	pc07
WBGene00004221	4.45087	1.38972	180.66	pc07
WBGene00007891	2.7511	1.41952	180.762	pc07
WBGene00017842	3.73782	0.803041	181.15	pc07
WBGene00009806	2.64461	1.62017	181.24	pc07
WBGene00000929	6.80304	0.705765	181.433	pc07
WBGene00021389	4.65525	1.47078	181.435	pc07
WBGene00003089	5.04692	0.573317	181.441	pc07
WBGene00021252	4.06671	1.08267	181.67	pc07
WBGene00077592	-0.0392991	0.645506	181.703	pc07
WBGene00009024	1.8401	1.06822	181.733	pc07
WBGene00009997	1.715	1.40024	181.803	pc07
WBGene00004309	3.5607	1.01359	181.819	pc07
WBGene00013352	7.46767	1.07111	181.855	pc07
WBGene00010714	4.03899	1.85902	181.92	pc07
WBGene00019348	1.11245	0.979831	182.018	pc07
WBGene00014008	2.7518	0.633321	182.12	pc07
WBGene00010330	4.32045	0.567096	182.366	pc07
WBGene00001701	3.08095	1.42253	182.411	pc07
WBGene00021675	4.92391	0.64275	182.618	pc07
WBGene00001714	6.54565	2.22146	182.662	pc07
WBGene00044633	0.500903	0.81709	182.741	pc07
WBGene00010396	3.59215	0.91823	182.751	pc07
WBGene00000711	0.235715	0.604117	182.902	pc07
WBGene00008875	3.72447	1.36101	182.987	pc07
WBGene00000930	0.0835071	0.509492	183.045	pc07
WBGene00009133	5.31705	1.25531	183.214	pc07
WBGene00022845	2.30208	0.946427	183.271	pc07
WBGene00020554	6.38751	1.29339	183.358	pc07
WBGene00020770	4.83131	0.511347	183.371	pc07
WBGene00006955	4.56218	1.38508	183.485	pc07
WBGene00018377	0.0470073	0.744901	183.563	pc07
WBGene00044294	7.38244	0.968079	183.621	pc07
WBGene00003534	5.8004	1.87277	183.644	pc07
WBGene00009229	2.18216	0.874172	183.724	pc07
WBGene00011624	4.1544	1.64653	184.025	pc07
WBGene00020149	6.38729	1.74667	184.074	pc07
WBGene00013509	2.50391	0.59014	184.185	pc07
WBGene00000652	4.76223	0.652506	184.288	pc07
WBGene00013171	3.65983	1.96655	184.343	pc07
WBGene00007916	4.48731	0.915405	184.442	pc07
WBGene00011952	1.69855	0.631297	184.472	pc07
WBGene00011321	1.79149	0.5377	184.496	pc07
WBGene00284867	1.1922	0.650155	184.545	pc07
WBGene00005153	5.26824	0.754283	184.668	pc07
WBGene00008161	0.105541	0.818684	184.676	pc07
WBGene00012810	1.77909	0.681101	184.716	pc07
WBGene00010243	0.583655	0.542592	184.733	pc07
WBGene00044662	2.28391	1.60648	184.794	pc07
WBGene00004102	1.08899	1.17242	184.809	pc07
WBGene00012814	4.44007	0.990428	184.98	pc07
WBGene00017938	2.7151	0.509286	185.16	pc07
WBGene00001059	5.1716	1.04054	185.178	pc07
WBGene00004217	4.75385	1.21581	185.209	pc07
WBGene00008499	4.96505	0.557968	185.387	pc07
WBGene00015199	1.20752	1.1094	185.554	pc07
WBGene00011757	3.47553	1.42728	185.578	pc07
WBGene00021052	3.75132	1.12861	185.678	pc07
WBGene00022155	5.21149	1.24831	185.71	pc07
WBGene00004091	5.95509	0.697467	185.758	pc07
WBGene00015479	2.40219	0.747756	185.791	pc07
WBGene00012744	1.60939	0.813501	185.902	pc07
WBGene00009155	2.82305	1.36473	186.036	pc07
WBGene00013173	5.00193	1.81333	186.049	pc07
WBGene00000647	2.46535	0.726926	186.059	pc07
WBGene00009677	5.75226	0.682382	186.079	pc07
WBGene00018535	1.6793	1.21058	186.116	pc07
WBGene00009328	3.07222	1.20921	186.189	pc07
WBGene00004992	3.11676	1.47439	186.23	pc07
WBGene00018713	2.36023	1.54016	186.425	pc07
WBGene00022283	6.00798	1.34965	186.433	pc07
WBGene00010924	6.28047	0.943687	186.484	pc07
WBGene00009593	1.47756	1.28103	186.499	pc07
WBGene00004017	6.09725	1.23666	186.558	pc07
WBGene00000649	5.77833	1.78741	186.699	pc07
WBGene00004115	4.47076	1.92569	186.753	pc07
WBGene00000745	4.25006	1.4817	186.793	pc07
WBGene00022018	3.8959	1.14603	186.912	pc07
WBGene00219325	1.52963	1.24117	186.921	pc07
WBGene00020560	5.87782	1.7123	186.945	pc07
WBGene00019906	1.15549	1.01736	187.021	pc07
WBGene00009541	1.72188	1.00526	187.322	pc07
WBGene00022423	5.02082	0.842311	187.355	pc07
WBGene00010268	3.73173	0.783552	187.393	pc07
WBGene00007494	0.491458	0.869758	187.394	pc07
WBGene00017526	0.599453	0.918466	187.399	pc07
WBGene00017814	4.31629	1.38297	187.523	pc07
WBGene00017416	3.89853	0.652206	187.586	pc07
WBGene00021496	-0.37026	0.517176	187.601	pc07
WBGene00001067	10.376	1.69376	187.647	pc07
WBGene00004232	6.07609	1.66159	187.652	pc07
WBGene00000620	5.08615	1.51966	187.806	pc07
WBGene00011075	2.22987	1.31779	187.823	pc07
WBGene00004231	2.51875	1.59335	187.881	pc07
WBGene00020386	1.83461	1.15182	187.925	pc07
WBGene00000606	10.1745	1.75165	187.936	pc07
WBGene00077714	1.05604	1.23473	187.948	pc07
WBGene00012670	2.12306	1.2322	188.399	pc07
WBGene00020863	1.09872	1.29393	188.56	pc07
WBGene00004104	5.37927	2.00222	188.561	pc07
WBGene00010345	3.07334	1.34401	188.58	pc07
WBGene00004397	9.17793	1.62037	188.733	pc07
WBGene00009218	6.35306	1.2281	188.739	pc07
WBGene00000746	5.76845	1.94864	188.744	pc07
WBGene00020283	5.33273	1.12734	188.845	pc07
WBGene00012743	0.536075	0.701339	189.091	pc07
WBGene00018899	1.92779	1.13213	189.108	pc07
WBGene00016921	1.24039	1.25022	189.13	pc07
WBGene00007600	5.77162	1.13777	189.243	pc07
WBGene00002036	4.822	0.509608	189.301	pc07
WBGene00005016	9.40775	1.58131	189.311	pc07
WBGene00017692	3.13525	0.77933	189.387	pc07
WBGene00017296	1.4774	0.942943	189.418	pc07
WBGene00000376	5.97455	0.540602	189.481	pc07
WBGene00020571	4.99553	1.6704	189.495	pc07
WBGene00010157	1.89469	1.45873	189.548	pc07
WBGene00007530	4.12947	1.15803	189.6	pc07
WBGene00020663	1.1435	0.824871	189.606	pc07
WBGene00019945	3.59295	0.711191	189.764	pc07
WBGene00006952	4.35317	1.60785	189.784	pc07
WBGene00015541	5.23848	1.30104	189.793	pc07
WBGene00016242	1.94908	1.29378	189.846	pc07
WBGene00010457	1.56024	1.04518	189.879	pc07
WBGene00001984	4.85187	0.921818	189.923	pc07
WBGene00000013	1.66933	1.26049	190.055	pc07
WBGene00015103	4.6098	1.987	190.068	pc07
WBGene00017089	2.71692	0.586695	190.07	pc07
WBGene00017835	4.57667	1.02454	190.187	pc07
WBGene00000618	9.63355	1.94779	190.313	pc07
WBGene00016805	5.02857	1.71501	190.342	pc07
WBGene00013130	3.55143	1.94018	190.489	pc07
WBGene00021547	3.02799	0.661069	190.565	pc07
WBGene00021326	4.92714	1.66096	190.808	pc07
WBGene00011476	3.22742	0.642757	190.91	pc07
WBGene00009355	4.57665	1.87041	191.067	pc07
WBGene00004398	9.48866	1.53106	191.175	pc07
WBGene00008655	5.25318	2.22257	191.22	pc07
WBGene00000684	1.70523	0.832676	191.254	pc07
WBGene00016217	4.45012	0.787166	191.254	pc07
WBGene00015841	5.57925	1.7475	191.261	pc07
WBGene00005008	2.83093	0.636632	191.332	pc07
WBGene00219436	3.79714	1.72095	191.413	pc07
WBGene00044499	3.70477	0.600236	191.699	pc07
WBGene00013385	4.57788	1.3367	191.737	pc07
WBGene00009573	6.02253	2.15766	191.934	pc07
WBGene00195051	3.13836	1.37176	191.969	pc07
WBGene00005017	9.53605	1.4702	192.07	pc07
WBGene00013926	5.80511	1.44771	192.102	pc07
WBGene00007592	5.48689	0.525825	192.156	pc07
WBGene00013960	3.14101	1.4294	192.24	pc07
WBGene00050875	5.55357	1.54696	192.387	pc07
WBGene00044109	7.30051	2.8764	192.474	pc07
WBGene00020515	-0.103892	0.64396	192.554	pc07
WBGene00009467	0.81379	1.21648	192.634	pc07
WBGene00017783	2.93853	1.2216	193.079	pc07
WBGene00017648	0.7031	0.519358	193.22	pc07
WBGene00019839	7.81072	1.33437	193.283	pc07
WBGene00050943	3.19317	1.11346	193.296	pc07
WBGene00021213	5.18486	1.23764	193.297	pc07
WBGene00001700	1.92528	1.89541	193.347	pc07
WBGene00003547	3.2295	1.50782	193.737	pc07
WBGene00016105	2.50946	1.54622	193.871	pc07
WBGene00001912	1.58528	0.663127	193.991	pc07
WBGene00006950	5.66138	1.52494	194.048	pc07
WBGene00022665	6.83153	1.11413	194.183	pc07
WBGene00018694	3.19804	1.48545	194.348	pc07
WBGene00019901	3.9007	1.60995	194.527	pc07
WBGene00019761	3.35039	1.62254	194.72	pc07
WBGene00018737	7.95998	1.83567	194.811	pc07
WBGene00005018	10.3791	1.56412	194.963	pc07
WBGene00001724	6.9909	1.89506	194.982	pc07
WBGene00006865	3.34603	0.789628	195.149	pc07
WBGene00007210	5.45091	1.58777	195.189	pc07
WBGene00175027	4.57566	1.84472	195.576	pc07
WBGene00000615	1.42923	1.127	195.592	pc07
WBGene00019232	-0.139921	0.541658	195.623	pc07
WBGene00007802	0.720202	0.912566	195.626	pc07
WBGene00021309	3.94016	1.41083	195.762	pc07
WBGene00007425	2.31387	0.886484	196.054	pc07
WBGene00010222	2.78632	0.777614	196.283	pc07
WBGene00003736	5.15283	0.599781	196.455	pc07
WBGene00015473	1.52344	0.814652	197.061	pc07
WBGene00015035	2.16794	0.919503	197.139	pc07
WBGene00006487	2.13589	0.873334	197.194	pc07
WBGene00015218	3.97236	1.29105	197.331	pc07
WBGene00004394	-0.286651	0.643518	197.493	pc07
WBGene00012433	5.95501	1.37369	197.513	pc07
WBGene00018113	3.50709	1.13617	197.514	pc07
WBGene00010267	4.9078	1.78207	197.515	pc07
WBGene00014094	3.14211	1.24723	197.602	pc07
WBGene00007742	0.585168	0.878476	198.32	pc07
WBGene00022680	6.7694	2.53119	198.529	pc07
WBGene00004225	5.53309	0.829419	198.593	pc07
WBGene00018487	6.08982	1.83281	198.94	pc07
WBGene00044680	-0.0966814	0.781669	199.006	pc07
WBGene00013846	2.60508	1.40406	199.214	pc07
WBGene00004155	1.45981	0.864721	199.228	pc07
WBGene00022747	3.85161	1.81845	199.269	pc07
WBGene00016132	1.87667	1.37304	199.339	pc07
WBGene00010594	3.4854	1.10033	199.53	pc07
WBGene00015545	5.73681	1.04226	199.914	pc07
WBGene00008954	3.00406	0.513355	199.982	pc07
WBGene00004216	5.2124	0.888324	200.029	pc07
WBGene00045481	0.472028	0.740811	200.092	pc07
WBGene00194737	0.477335	1.00265	200.64	pc07
WBGene00018039	1.73213	1.2752	200.786	pc07
WBGene00018809	0.444845	1.17453	200.865	pc07
WBGene00001397	5.16442	0.501318	200.924	pc07
WBGene00011077	1.561	1.26536	200.966	pc07
WBGene00011948	0.606627	0.675575	201.014	pc07
WBGene00235330	2.94574	0.67114	201.256	pc07
WBGene00013295	3.72034	0.552159	201.381	pc07
WBGene00012429	4.37072	1.50471	201.418	pc07
WBGene00011272	6.57949	0.985975	201.42	pc07
WBGene00001564	7.32597	0.611728	201.677	pc07
WBGene00022130	3.18212	0.728773	201.758	pc07
WBGene00044533	4.89849	1.73742	201.829	pc07
WBGene00001640	0.154712	0.550643	201.961	pc07
WBGene00010466	1.48396	1.12103	202.02	pc07
WBGene00019226	2.36111	0.67622	202.244	pc07
WBGene00014009	4.83153	2.36383	202.304	pc07
WBGene00000679	1.4156	0.942323	202.351	pc07
WBGene00014183	7.75182	1.66677	202.377	pc07
WBGene00015442	3.33288	1.31599	202.413	pc07
WBGene00013891	5.26569	1.86716	202.418	pc07
WBGene00009759	0.340993	0.953499	202.538	pc07
WBGene00007836	7.45855	0.683366	202.801	pc07
WBGene00007397	2.09422	0.897604	202.916	pc07
WBGene00009561	2.80253	1.39258	203.052	pc07
WBGene00015720	1.25382	0.663711	203.083	pc07
WBGene00012346	2.48629	1.5517	203.272	pc07
WBGene00043049	2.14071	0.65632	203.322	pc07
WBGene00018172	2.59786	1.18257	203.684	pc07
WBGene00017635	2.71437	0.60984	203.814	pc07
WBGene00022038	3.73592	1.72988	204.392	pc07
WBGene00001691	2.72561	1.69422	204.638	pc07
WBGene00008512	5.00482	1.02375	204.691	pc07
WBGene00008290	1.15345	1.12685	205.082	pc07
WBGene00007874	4.81225	2.01939	205.394	pc07
WBGene00007871	4.88824	2.05506	205.418	pc07
WBGene00044395	4.11576	1.38649	205.475	pc07
WBGene00012980	4.61525	0.520024	205.64	pc07
WBGene00010505	4.0929	1.41301	205.718	pc07
WBGene00045024	2.67807	1.59235	205.921	pc07
WBGene00004127	4.91305	2.25207	206.05	pc07
WBGene00022180	5.51801	0.610041	206.14	pc07
WBGene00020743	2.94685	1.2185	206.165	pc07
WBGene00007869	3.72937	2.00382	206.178	pc07
WBGene00010968	4.21862	1.57896	206.419	pc07
WBGene00009331	4.88761	1.08913	206.876	pc07
WBGene00003075	3.71041	1.52102	206.972	pc07
WBGene00022627	2.55575	1.1671	207.064	pc07
WBGene00013450	-0.0890602	0.507446	207.114	pc07
WBGene00003533	4.31746	1.88926	207.14	pc07
WBGene00013904	4.37833	0.925421	207.552	pc07
WBGene00007687	4.14299	1.32613	207.582	pc07
WBGene00138711	3.84215	1.59908	207.621	pc07
WBGene00045497	2.13698	1.31079	207.643	pc07
WBGene00017519	0.255862	0.971512	208.092	pc07
WBGene00001962	0.650083	0.740639	208.178	pc07
WBGene00010830	3.70582	1.60925	208.209	pc07
WBGene00003525	3.28657	1.46592	208.351	pc07
WBGene00015335	3.42339	1.53822	208.51	pc07
WBGene00015981	3.87082	0.530553	208.518	pc07
WBGene00019306	3.11387	1.81216	208.567	pc07
WBGene00016000	0.119195	0.857775	208.681	pc07
WBGene00009528	4.29244	0.82606	208.724	pc07
WBGene00010336	5.06304	0.546193	208.725	pc07
WBGene00021407	5.58615	1.09055	208.757	pc07
WBGene00011587	3.39224	1.23276	208.965	pc07
WBGene00018829	2.17537	1.4029	209.215	pc07
WBGene00019640	1.45539	1.40732	209.435	pc07
WBGene00020903	2.65503	0.50576	209.506	pc07
WBGene00019538	4.71425	1.36496	209.628	pc07
WBGene00004998	5.30761	1.68684	209.694	pc07
WBGene00009720	2.45593	1.78699	209.763	pc07
WBGene00017923	5.40262	0.645759	209.932	pc07
WBGene00003778	1.97418	0.652847	210.102	pc08
WBGene00011235	6.76879	1.84512	210.112	pc08
WBGene00003552	4.08744	1.57517	210.224	pc08
WBGene00016731	3.39011	1.80665	210.788	pc08
WBGene00007374	1.25613	0.852726	210.958	pc08
WBGene00206462	-0.284534	0.668019	211.001	pc08
WBGene00021690	7.03322	2.34919	211.461	pc08
WBGene00020270	2.91268	1.40898	211.678	pc08
WBGene00003933	4.38817	0.550562	211.718	pc08
WBGene00077768	1.18611	1.0129	211.724	pc08
WBGene00020599	4.46621	1.39388	211.725	pc08
WBGene00007806	4.04163	1.71734	211.735	pc08
WBGene00008341	6.45626	0.545713	211.768	pc08
WBGene00003057	7.44807	1.5628	211.949	pc08
WBGene00020014	3.94037	1.56655	212.015	pc08
WBGene00015339	9.92363	1.81484	212.096	pc08
WBGene00010698	1.69551	1.09825	212.107	pc08
WBGene00019868	3.75432	1.37183	212.215	pc08
WBGene00011530	4.83429	1.81852	212.25	pc08
WBGene00013573	0.826825	0.91194	212.42	pc08
WBGene00077692	3.3824	0.518668	212.445	pc08
WBGene00044571	1.25941	1.55505	212.532	pc08
WBGene00007933	2.18771	0.601836	212.56	pc08
WBGene00008773	2.43741	0.899557	212.583	pc08
WBGene00011928	1.93342	0.707975	212.662	pc08
WBGene00011888	4.38597	0.616105	212.668	pc08
WBGene00008711	4.71751	0.93976	212.694	pc08
WBGene00009292	2.24104	0.750094	212.834	pc08
WBGene00008732	3.59677	1.57116	212.856	pc08
WBGene00011559	6.67082	0.853975	212.872	pc08
WBGene00020551	5.20395	1.79021	213.168	pc08
WBGene00008876	4.83177	0.524711	213.169	pc08
WBGene00006954	2.78831	1.53647	213.196	pc08
WBGene00010474	0.974926	1.0824	213.263	pc08
WBGene00009998	1.38328	1.20087	213.382	pc08
WBGene00003531	2.78423	1.74883	213.572	pc08
WBGene00013865	2.15245	1.28316	213.691	pc08
WBGene00013622	0.561697	0.872494	213.98	pc08
WBGene00018573	2.28788	1.35635	214.151	pc08
WBGene00194952	0.422674	0.719501	214.476	pc08
WBGene00043981	2.34756	1.26998	215.02	pc08
WBGene00022679	9.21526	2.63394	215.039	pc08
WBGene00010899	3.11654	0.878068	215.053	pc08
WBGene00003545	1.47088	0.657675	215.156	pc08
WBGene00022698	1.46833	1.38683	215.191	pc08
WBGene00011468	1.64969	1.32338	215.462	pc08
WBGene00020010	1.36422	0.856722	215.485	pc08
WBGene00020791	0.301356	0.776544	215.501	pc08
WBGene00020148	4.64399	1.22152	215.77	pc08
WBGene00012727	1.52235	0.546818	216.017	pc08
WBGene00016598	2.22221	1.07252	216.125	pc08
WBGene00009356	3.12536	1.65161	216.251	pc08
WBGene00019756	3.40909	1.62689	216.368	pc08
WBGene00010723	6.67849	1.62211	216.389	pc08
WBGene00000651	1.63075	1.32912	216.399	pc08
WBGene00002203	6.68746	0.566902	216.417	pc08
WBGene00015645	4.24609	1.75728	216.448	pc08
WBGene00011590	6.23777	0.899545	216.633	pc08
WBGene00015369	2.92162	0.60726	216.703	pc08
WBGene00017168	0.260115	0.583625	216.744	pc08
WBGene00010008	3.77938	1.25038	216.781	pc08
WBGene00000255	2.51711	1.43296	216.828	pc08
WBGene00010467	3.46968	1.91387	216.988	pc08
WBGene00017068	4.74562	2.24069	217.003	pc08
WBGene00007999	7.02536	0.882955	217.142	pc08
WBGene00000625	6.58435	1.99515	217.242	pc08
WBGene00004771	5.24233	0.876136	217.257	pc08
WBGene00003518	3.32626	0.536916	217.298	pc08
WBGene00008652	6.81098	2.31826	217.336	pc08
WBGene00020237	7.59267	1.13348	217.338	pc08
WBGene00015522	0.841552	0.810389	217.362	pc08
WBGene00000747	3.76391	1.75822	217.38	pc08
WBGene00020017	4.93451	2.23587	217.491	pc08
WBGene00020327	1.20266	1.26317	217.562	pc08
WBGene00008314	2.89193	0.974474	217.586	pc08
WBGene00000610	3.27629	1.83224	217.703	pc08
WBGene00015822	1.86062	0.651599	217.717	pc08
WBGene00016164	1.75741	1.72782	217.729	pc08
WBGene00004150	2.52223	1.69267	217.732	pc08
WBGene00012921	3.65276	0.951779	217.825	pc08
WBGene00010468	7.01798	2.47247	217.837	pc08
WBGene00018026	2.74903	1.59533	217.844	pc08
WBGene00010948	3.45571	1.8931	217.881	pc08
WBGene00007903	5.32302	2.30532	217.97	pc08
WBGene00008260	6.1379	1.06431	217.986	pc08
WBGene00020034	1.32901	0.879398	218.077	pc08
WBGene00000672	7.11859	2.25611	218.087	pc08
WBGene00000678	7.16434	2.32648	218.093	pc08
WBGene00000082	3.71738	1.91107	218.124	pc08
WBGene00010016	0.516614	1.04507	218.131	pc08
WBGene00003526	4.53178	1.87225	218.151	pc08
WBGene00020040	7.33879	2.48617	218.187	pc08
WBGene00004174	8.00476	2.16015	218.215	pc08
WBGene00004764	3.73135	0.640273	218.257	pc08
WBGene00020039	7.10884	2.39762	218.266	pc08
WBGene00003104	4.29185	1.89943	218.281	pc08
WBGene00001063	4.75395	2.01805	218.337	pc08
WBGene00003542	3.26739	2.02297	218.338	pc08
WBGene00008449	4.35685	2.04651	218.364	pc08
WBGene00012304	1.20943	1.36865	218.665	pc08
WBGene00003879	5.64593	2.02357	218.76	pc08
WBGene00020594	2.16221	1.03993	218.809	pc08
WBGene00000631	6.30273	2.37747	218.833	pc08
WBGene00011524	4.85377	0.95932	218.884	pc08
WBGene00020801	4.26347	0.910224	218.891	pc08
WBGene00010509	4.11931	2.10294	218.927	pc08
WBGene00009904	4.27502	1.37752	218.928	pc08
WBGene00000603	7.48841	2.22911	218.942	pc08
WBGene00017841	6.17282	1.60514	219.141	pc08
WBGene00010917	3.38992	1.81974	219.167	pc08
WBGene00019184	6.79052	2.34612	219.174	pc08
WBGene00017524	1.84037	1.60993	219.276	pc08
WBGene00001694	7.61351	1.59424	219.312	pc08
WBGene00007343	5.20831	1.40118	219.344	pc08
WBGene00000683	6.43682	2.30602	219.364	pc08
WBGene00001704	2.24052	1.24729	219.377	pc08
WBGene00014039	5.79344	2.07847	219.384	pc08
WBGene00004234	3.30496	1.34024	219.408	pc08
WBGene00000174	1.66994	0.505413	219.577	pc08
WBGene00007823	2.76965	1.90196	219.58	pc08
WBGene00015646	6.96227	1.55422	219.588	pc08
WBGene00007598	0.0361249	0.692619	219.613	pc08
WBGene00017438	6.07895	2.36665	219.66	pc08
WBGene00020947	4.89679	1.06102	219.713	pc08
WBGene00016962	4.21784	1.63055	219.717	pc08
WBGene00016196	3.84582	2.04349	219.738	pc08
WBGene00015794	5.18519	1.09063	219.802	pc08
WBGene00004301	1.63758	0.838477	219.849	pc08
WBGene00010359	-0.101473	0.728506	220.098	pc08
WBGene00044724	7.16896	1.10256	220.377	pc08
WBGene00195004	3.45228	1.87891	220.483	pc08
WBGene00017351	2.34766	1.66937	220.485	pc08
WBGene00008482	3.25122	1.45978	220.602	pc08
WBGene00018297	11.0035	2.12735	220.63	pc08
WBGene00015340	8.29934	1.98383	220.715	pc08
WBGene00000759	3.2826	0.987663	220.775	pc08
WBGene00044016	3.83938	2.223	220.8	pc08
WBGene00010926	2.39928	1.76977	220.853	pc08
WBGene00008557	2.44123	1.23069	220.87	pc08
WBGene00001725	8.24215	2.60032	220.974	pc08
WBGene00000641	6.65676	1.9984	221.014	pc08
WBGene00022026	4.33995	0.704157	221.027	pc08
WBGene00012260	2.51791	1.23609	221.027	pc08
WBGene00011594	2.77954	1.24965	221.133	pc08
WBGene00020478	3.00749	1.37612	221.138	pc08
WBGene00017807	2.9221	1.1157	221.152	pc08
WBGene00016733	5.58652	1.92726	221.205	pc08
WBGene00020670	3.46992	2.14958	221.236	pc08
WBGene00020766	3.62124	1.87054	221.297	pc08
WBGene00016130	2.86757	2.0823	221.409	pc08
WBGene00000611	6.29296	1.18621	221.464	pc08
WBGene00000637	2.65904	1.33447	221.702	pc08
WBGene00008047	2.50924	1.69664	221.753	pc08
WBGene00019960	4.79641	1.08528	221.909	pc08
WBGene00019545	2.59271	1.24038	221.916	pc08
WBGene00010464	4.40966	1.91056	221.951	pc08
WBGene00003532	2.18228	1.39929	221.959	pc08
WBGene00206364	0.376558	0.823533	221.969	pc08
WBGene00009099	1.24257	1.0158	222.024	pc08
WBGene00021087	3.24706	2.07595	222.027	pc08
WBGene00000664	4.12936	1.36868	222.041	pc08
WBGene00206373	3.31972	0.924986	222.304	pc08
WBGene00021625	9.98756	2.37917	222.306	pc08
WBGene00009496	2.80359	1.04017	222.421	pc08
WBGene00016259	2.62935	1.38397	222.531	pc08
WBGene00012777	3.48147	1.37104	222.582	pc08
WBGene00021446	3.76574	0.923553	222.633	pc08
WBGene00000689	4.09085	2.16871	222.729	pc08
WBGene00004300	9.6835	1.75839	222.893	pc08
WBGene00009983	10.2195	2.19482	222.907	pc08
WBGene00012144	6.07277	0.675484	222.979	pc08
WBGene00004118	2.73673	1.87135	223.077	pc08
WBGene00007934	7.89896	0.583096	223.106	pc08
WBGene00002259	6.52523	0.61466	223.135	pc08
WBGene00003031	3.47588	0.727733	223.201	pc08
WBGene00019372	0.82996	0.661036	223.223	pc08
WBGene00000687	4.71248	1.49981	223.459	pc08
WBGene00000657	3.93441	1.57173	223.525	pc08
WBGene00017798	3.48819	0.572146	223.699	pc08
WBGene00003981	0.377908	0.882403	223.779	pc08
WBGene00011041	1.25079	1.23273	223.793	pc08
WBGene00001710	3.083	1.92883	223.901	pc08
WBGene00011103	4.07032	1.52902	224.052	pc08
WBGene00195068	6.69498	1.97472	224.067	pc08
WBGene00022410	8.48921	0.533844	224.085	pc08
WBGene00017073	5.94782	1.91956	224.376	pc08
WBGene00077697	2.57959	0.883637	224.447	pc08
WBGene00044569	2.60082	2.00811	224.559	pc08
WBGene00003878	4.14909	0.573042	224.62	pc08
WBGene00009982	11.1518	1.1813	224.678	pc08
WBGene00019721	2.15198	1.23059	224.717	pc08
WBGene00000894	6.44501	0.675292	224.732	pc08
WBGene00014245	2.98802	1.59357	224.968	pc08
WBGene00021436	1.84202	1.53819	225.069	pc08
WBGene00011278	5.0092	2.16588	225.293	pc08
WBGene00018976	3.05557	0.722876	225.319	pc08
WBGene00164969	3.26907	1.78044	225.537	pc08
WBGene00000681	9.48545	1.51949	225.625	pc08
WBGene00016732	4.23571	1.89849	225.639	pc08
WBGene00016468	2.39844	1.58354	225.672	pc08
WBGene00009326	2.22533	0.733252	225.689	pc08
WBGene00015457	3.59849	2.23491	225.705	pc08
WBGene00018591	1.27154	1.07599	225.808	pc08
WBGene00003763	1.45576	0.599286	225.88	pc08
WBGene00020893	2.98376	1.83823	226.21	pc08
WBGene00022231	4.60253	0.544608	226.368	pc08
WBGene00020646	2.16788	1.55251	226.415	pc08
WBGene00018896	1.15756	1.097	226.466	pc08
WBGene00015798	1.44614	0.764319	226.507	pc08
WBGene00016700	0.182457	0.69046	226.709	pc08
WBGene00015453	3.16517	1.70616	226.788	pc08
WBGene00011136	2.07225	0.937003	226.827	pc08
WBGene00017839	0.11512	0.611266	226.974	pc08
WBGene00019067	2.39083	0.544896	226.975	pc08
WBGene00008967	4.95946	1.83925	226.999	pc08
WBGene00012942	6.34327	2.37525	227.004	pc08
WBGene00019487	3.67135	0.636321	227.009	pc08
WBGene00000658	0.211994	0.616003	227.04	pc08
WBGene00011551	3.33532	0.744012	227.042	pc08
WBGene00010801	1.29285	1.21745	227.104	pc08
WBGene00020239	1.43876	1.6108	227.105	pc08
WBGene00001066	10.4806	1.73304	227.256	pc08
WBGene00009060	2.84099	0.9881	227.528	pc08
WBGene00270320	2.07589	1.05057	227.552	pc08
WBGene00003816	5.02422	1.50527	227.598	pc08
WBGene00010832	2.21062	1.77672	227.63	pc08
WBGene00001074	10.6002	1.67178	227.719	pc08
WBGene00021975	4.68119	0.929323	227.783	pc08
WBGene00020243	1.85043	0.953712	228.007	pc08
WBGene00011999	4.41429	1.81496	228.681	pc08
WBGene00009144	1.64265	0.577022	228.832	pc08
WBGene00021653	1.3819	0.840548	228.894	pc08
WBGene00194658	1.60082	0.734375	229.067	pc08
WBGene00271822	0.635964	0.872847	229.354	pc08
WBGene00008215	6.64587	0.774996	229.487	pc08
WBGene00011313	3.25779	2.18744	229.505	pc08
WBGene00008832	4.73896	0.579193	229.577	pc08
WBGene00019717	5.45407	1.29844	229.62	pc08
WBGene00017775	6.92986	0.500565	229.764	pc08
WBGene00003248	3.31409	0.526938	229.827	pc08
WBGene00010907	2.80919	0.870669	230.018	pc08
WBGene00012339	5.7841	0.715491	230.557	pc08
WBGene00008146	0.775951	0.743711	230.621	pc08
WBGene00001210	2.9167	0.702106	230.916	pc08
WBGene00001875	1.87818	0.579741	232.203	pc08
WBGene00020244	0.510544	0.533162	232.499	pc08
WBGene00017052	3.89555	1.89123	232.609	pc08
WBGene00009274	4.43489	0.564105	232.643	pc08
WBGene00018641	2.21673	0.753508	232.726	pc08
WBGene00021212	1.10153	0.662226	232.927	pc08
WBGene00001703	6.13479	2.04281	233.159	pc08
WBGene00007926	4.30555	1.13943	233.226	pc08
WBGene00004122	5.90242	0.833599	233.279	pc08
WBGene00015546	3.40465	1.82747	233.325	pc08
WBGene00003887	5.4934	1.1764	233.328	pc08
WBGene00018726	1.50415	1.2182	233.523	pc08
WBGene00045146	3.6431	1.66365	233.867	pc08
WBGene00016735	4.16814	0.585475	233.957	pc08
WBGene00003876	3.85276	0.639246	234.186	pc08
WBGene00002095	2.77329	0.754786	234.231	pc08
WBGene00004328	2.46147	0.68082	234.658	pc08
WBGene00043534	1.20919	1.24331	234.743	pc08
WBGene00019236	6.39809	1.94064	235.079	pc08
WBGene00044539	-0.316517	0.541194	235.178	pc08
WBGene00010355	0.537634	0.839778	236.002	pc08
WBGene00020792	1.05786	0.94751	236.149	pc08
WBGene00003554	4.30744	1.71288	236.193	pc08
WBGene00044019	6.37828	0.682556	236.376	pc08
WBGene00015458	3.13839	1.93368	236.445	pc08
WBGene00014148	7.02006	0.786971	236.594	pc08
WBGene00022789	4.66835	1.47724	236.661	pc08
WBGene00001476	4.96504	0.668232	237.26	pc08
WBGene00000665	9.4964	1.37722	237.84	pc08
WBGene00016946	0.749291	0.894022	237.973	pc08
WBGene00015169	4.61146	1.71716	238.057	pc08
WBGene00002252	2.55688	0.554144	239.063	pc08
WBGene00235279	2.05605	1.37329	239.188	pc08
WBGene00019636	4.17268	0.792349	239.501	pc08
WBGene00019754	3.934	1.31609	239.554	pc08
WBGene00007691	0.789266	0.707082	239.623	pc08
WBGene00011112	5.1871	1.39118	239.657	pc08
WBGene00021504	1.03182	0.818794	239.721	pc08
WBGene00007935	2.59456	1.12765	239.829	pc08
WBGene00016892	4.89376	0.867795	240.077	pc09
WBGene00013331	4.00156	2.13256	240.126	pc09
WBGene00000760	0.604219	0.780697	240.182	pc09
WBGene00022417	3.84246	1.6412	240.375	pc09
WBGene00010080	3.90167	0.576883	241.128	pc09
WBGene00000685	5.23956	1.77859	241.269	pc09
WBGene00003033	2.61893	0.525179	241.424	pc09
WBGene00077669	2.6605	0.506999	241.476	pc09
WBGene00000425	2.66739	0.904353	241.739	pc09
WBGene00016153	2.98193	1.89763	241.857	pc09
WBGene00004146	3.55108	1.9735	242.193	pc09
WBGene00001577	1.53436	0.514849	242.524	pc09
WBGene00014178	3.16088	1.86105	242.544	pc09
WBGene00007911	2.53692	1.45246	242.567	pc09
WBGene00003527	4.219	1.29368	242.976	pc09
WBGene00015142	4.23343	1.40191	243.391	pc09
WBGene00022337	1.55698	0.505599	243.448	pc09
WBGene00012168	3.75432	1.57099	243.585	pc09
WBGene00010510	0.166753	0.804924	244.119	pc09
WBGene00017204	1.20467	1.30858	244.181	pc09
WBGene00021597	5.05316	0.583448	244.209	pc09
WBGene00005949	1.50697	0.757863	244.744	pc09
WBGene00011266	3.4791	1.90428	245.103	pc09
WBGene00015048	5.49892	0.554351	246.756	pc09
WBGene00044011	4.98308	2.1662	246.806	pc09
WBGene00021215	1.3109	0.7388	246.895	pc09
WBGene00077691	5.64861	2.39404	247.016	pc09
WBGene00011536	4.78331	2.3217	247.363	pc09
WBGene00011537	5.15093	2.30934	247.555	pc09
WBGene00020634	1.71455	0.809815	247.77	pc09
WBGene00009102	2.66817	0.503358	247.851	pc09
WBGene00006622	1.86396	0.719726	248.051	pc09
WBGene00001695	5.25329	2.2787	248.107	pc09
WBGene00020803	5.33786	2.13935	248.117	pc09
WBGene00016219	3.94606	0.631402	248.424	pc09
WBGene00003548	4.783	2.04206	248.534	pc09
WBGene00044071	4.51829	0.628933	248.938	pc09
WBGene00018514	3.37624	0.639382	249.032	pc09
WBGene00017424	1.45543	1.16028	249.355	pc09
WBGene00018292	4.44696	2.1951	249.736	pc09
WBGene00012699	1.69447	0.94152	249.777	pc09
WBGene00008545	0.299861	0.540612	250.057	pc09
WBGene00011006	4.66783	0.519997	250.501	pc09
WBGene00007717	2.36944	0.991237	250.618	pc09
WBGene00011522	6.8686	0.820539	250.671	pc09
WBGene00017388	0.466953	0.56784	251.027	pc09
WBGene00020567	3.15517	1.45708	251.069	pc09
WBGene00009903	1.63317	0.714186	251.519	pc09
WBGene00000932	3.83768	1.67648	252.159	pc09
WBGene00007344	4.69582	2.13702	252.967	pc09
WBGene00017430	6.06421	1.27691	253.466	pc09
WBGene00010831	2.72626	1.58158	253.64	pc09
WBGene00020421	2.82321	1.41229	254.251	pc09
WBGene00006591	4.90265	1.66567	254.285	pc09
WBGene00001109	1.62339	0.827892	254.376	pc09
WBGene00009916	2.74875	1.02187	254.432	pc09
WBGene00008944	5.94795	0.556151	254.733	pc09
WBGene00021085	5.24733	1.71123	254.774	pc09
WBGene00020260	3.30634	0.613915	255.208	pc09
WBGene00020806	4.39149	1.32086	255.557	pc09
WBGene00021086	5.275	1.71367	255.657	pc09
WBGene00007262	3.01959	1.90747	256.288	pc09
WBGene00045460	0.0728105	0.884523	256.413	pc09
WBGene00011949	3.25918	2.04087	256.421	pc09
WBGene00235273	1.89606	0.673024	256.812	pc09
WBGene00018708	2.03955	0.576269	257.358	pc09
WBGene00007853	-0.402144	0.514743	257.71	pc09
WBGene00022861	5.00711	0.528714	257.789	pc09
WBGene00011494	1.70132	0.596685	257.854	pc09
WBGene00022314	4.15644	0.721625	257.982	pc09
WBGene00021645	6.05133	1.09777	258.299	pc09
WBGene00017743	1.75465	1.29701	258.318	pc09
WBGene00013257	3.27247	0.723082	258.62	pc09
WBGene00007206	3.43255	0.735115	258.771	pc09
WBGene00019604	4.85068	0.799629	258.801	pc09
WBGene00007208	3.43307	0.735183	258.819	pc09
WBGene00021084	4.68733	1.75002	258.904	pc09
WBGene00018031	5.57565	2.15509	259.26	pc09
WBGene00021379	3.72445	1.11668	259.308	pc09
WBGene00019579	1.53161	0.52276	259.508	pc09
WBGene00015388	1.86634	1.06873	259.812	pc09
WBGene00010717	1.98916	1.37462	260.351	pc09
WBGene00015906	2.33655	0.87908	260.912	pc09
WBGene00001623	3.17536	0.65342	261.242	pc09
WBGene00015046	4.98729	0.771635	261.288	pc09
WBGene00004859	5.19759	0.785044	261.352	pc09
WBGene00001722	0.0851418	0.685249	261.702	pc09
WBGene00219376	2.86515	1.39226	261.705	pc09
WBGene00011895	4.38344	1.91044	261.755	pc09
WBGene00000030	5.8546	2.30437	261.806	pc09
WBGene00004156	6.32018	1.93852	261.811	pc09
WBGene00004139	4.20153	1.82377	261.893	pc09
WBGene00008559	3.08482	2.03465	262.695	pc09
WBGene00000644	2.26374	1.04549	262.971	pc09
WBGene00000024	4.1537	2.03798	263.506	pc09
WBGene00010057	3.40455	1.08377	263.699	pc09
WBGene00000031	6.13652	2.24651	263.727	pc09
WBGene00018424	4.53547	0.76397	263.811	pc09
WBGene00000750	2.16288	0.842249	264.09	pc09
WBGene00000693	3.87745	1.15752	264.837	pc09
WBGene00016585	3.42088	0.614049	264.877	pc09
WBGene00004098	4.02394	1.99441	264.957	pc09
WBGene00004154	3.92708	1.50129	264.985	pc09
WBGene00000704	7.03561	2.1268	265.421	pc09
WBGene00000645	2.42665	1.23077	265.448	pc09
WBGene00000653	6.17489	1.8291	265.616	pc09
WBGene00304787	2.59594	1.59077	265.811	pc09
WBGene00004099	5.73659	2.47248	266.716	pc09
WBGene00009081	5.98156	0.658902	267.079	pc09
WBGene00008167	5.85093	0.647119	267.813	pc09
WBGene00000029	5.80887	2.39612	267.821	pc09
WBGene00011404	3.82727	0.916174	267.836	pc09
WBGene00016596	6.50107	2.09093	267.884	pc09
WBGene00001888	5.19381	0.507409	267.96	pc09
WBGene00271606	1.99894	0.635294	267.976	pc09
WBGene00018619	2.83062	1.87573	268.117	pc09
WBGene00018616	4.79552	1.96722	268.189	pc09
WBGene00044788	1.89042	0.97899	268.321	pc09
WBGene00013762	3.47588	0.938813	268.654	pc09
WBGene00010289	1.01018	0.740856	268.84	pc09
WBGene00013895	5.32545	1.16102	269.296	pc09
WBGene00001715	2.62949	1.90674	269.328	pc09
WBGene00015623	3.07712	0.901224	269.551	pc09
WBGene00195209	2.26606	0.576796	270.096	pc10
WBGene00016013	5.12309	0.557946	270.417	pc10
WBGene00020219	3.61634	1.45723	270.753	pc10
WBGene00021627	2.78297	1.44433	271.112	pc10
WBGene00001608	2.53098	0.978844	271.162	pc10
WBGene00009257	3.00203	0.892943	271.285	pc10
WBGene00001713	6.54609	1.85914	271.476	pc10
WBGene00016146	5.71232	1.83302	271.508	pc10
WBGene00015660	6.26688	0.983746	271.562	pc10
WBGene00010987	3.40517	2.00615	271.685	pc10
WBGene00006832	3.86641	0.613641	271.739	pc10
WBGene00013943	1.36545	1.78699	271.908	pc10
WBGene00008486	4.10471	0.791015	271.953	pc10
WBGene00018937	3.09111	1.77	272.101	pc10
WBGene00017218	3.62202	1.96331	272.345	pc10
WBGene00003520	2.52805	1.77556	272.719	pc10
WBGene00044316	3.85791	1.38199	272.74	pc10
WBGene00019859	2.30871	0.540767	273.283	pc10
WBGene00020280	4.59671	0.65584	273.415	pc10
WBGene00021083	3.49858	1.53237	273.518	pc10
WBGene00018787	3.97271	0.661576	273.635	pc10
WBGene00012729	2.85115	1.73611	273.699	pc10
WBGene00000033	4.1954	2.01837	273.791	pc10
WBGene00008396	0.154238	0.577648	273.873	pc10
WBGene00007243	3.88042	2.15364	273.873	pc10
WBGene00011081	3.33809	1.48869	274.037	pc10
WBGene00019939	2.9117	1.69441	274.152	pc10
WBGene00077525	3.1744	0.963798	274.292	pc10
WBGene00000699	11.8492	1.06678	274.573	pc10
WBGene00004153	2.87352	2.02545	275.018	pc10
WBGene00000616	7.86131	2.24855	275.379	pc10
WBGene00010348	4.53856	1.19496	275.591	pc10
WBGene00003717	0.191823	0.504333	275.621	pc10
WBGene00021343	2.28212	1.31581	276.004	pc10
WBGene00022331	2.67272	0.593625	276.309	pc10
WBGene00019382	2.63778	1.5718	276.587	pc10
WBGene00006925	0.552207	0.579858	276.715	pc10
WBGene00007250	3.03631	2.0168	276.777	pc10
WBGene00045096	0.955804	1.133	277.088	pc10
WBGene00020576	5.41116	0.556213	277.151	pc10
WBGene00008926	4.64375	1.19111	277.23	pc10
WBGene00000669	8.29882	1.54815	277.374	pc10
WBGene00011640	1.34751	0.523892	277.482	pc10
WBGene00000666	5.28099	1.78815	277.51	pc10
WBGene00012130	3.6981	0.692301	277.613	pc10
WBGene00000730	7.79533	1.02881	277.786	pc10
WBGene00012034	2.52415	0.53197	277.911	pc10
WBGene00000753	9.28152	1.04653	278.011	pc10
WBGene00011535	4.91696	2.29447	278.133	pc10
WBGene00007748	3.01786	0.50067	278.181	pc10
WBGene00007246	3.45678	2.17698	278.259	pc10
WBGene00000728	8.49263	1.05713	278.383	pc10
WBGene00008993	4.25308	0.981612	278.915	pc10
WBGene00008296	5.57833	1.13973	278.932	pc10
WBGene00008602	2.41693	0.713725	278.993	pc10
WBGene00017446	2.56433	1.75141	279.487	pc10
WBGene00003590	4.35642	0.534359	279.547	pc10
WBGene00015544	3.15469	2.03847	279.585	pc10
WBGene00022649	4.60386	1.16883	280.254	pc10
WBGene00015519	3.73694	0.945746	280.338	pc10
WBGene00000032	2.36034	1.69026	280.515	pc10
WBGene00009398	3.6866	2.07689	280.598	pc10
WBGene00001410	4.31952	0.796857	280.743	pc10
WBGene00022673	3.91962	0.535631	280.909	pc10
WBGene00006599	5.51192	0.624591	280.983	pc10
WBGene00016915	2.41005	1.32398	281.348	pc10
WBGene00018839	0.282343	0.587965	281.384	pc10
WBGene00009532	5.7337	1.10096	281.585	pc10
WBGene00016729	0.00886055	0.576127	281.618	pc10
WBGene00007716	1.09259	0.96986	281.974	pc10
WBGene00020995	3.39987	1.84033	282.056	pc10
WBGene00004141	2.28205	1.66493	282.221	pc10
WBGene00017761	2.52047	1.17804	282.295	pc10
WBGene00185117	-0.154928	0.539074	282.594	pc10
WBGene00011793	1.39509	0.837827	282.611	pc10
WBGene00010760	4.08596	2.36799	282.663	pc10
WBGene00022313	3.09781	1.01023	282.818	pc10
WBGene00000727	9.10345	1.04822	283.436	pc10
WBGene00008303	0.793409	0.546613	284.342	pc10
WBGene00013082	3.49016	0.77896	284.592	pc10
WBGene00011642	2.12999	1.39138	284.8	pc10
WBGene00001731	1.22821	1.08995	285.2	pc10
WBGene00019152	4.22375	2.57147	285.237	pc10
WBGene00021565	2.92385	0.542135	285.719	pc10
WBGene00000634	4.24811	1.59717	286.034	pc10
WBGene00017305	4.0545	2.23307	286.245	pc10
WBGene00000700	6.5962	1.07211	286.625	pc10
WBGene00010765	1.42734	1.39172	286.626	pc10
WBGene00017009	1.80744	1.07889	286.749	pc10
WBGene00020033	7.20582	1.73484	286.768	pc10
WBGene00000701	6.74105	1.07001	287.43	pc10
WBGene00022161	2.49618	0.697446	287.816	pc10
WBGene00018162	2.76381	1.75727	288.406	pc10
WBGene00018966	2.31835	0.538238	288.557	pc10
WBGene00003705	2.56589	0.879272	288.803	pc10
WBGene00018170	3.92436	1.92614	289.177	pc10
WBGene00007251	2.27403	1.544	289.279	pc10
WBGene00020674	0.638518	0.585618	290.371	pc10
WBGene00011325	2.02043	1.47836	290.558	pc10
WBGene00018562	4.59186	0.564282	290.697	pc10
WBGene00012970	3.76444	0.555123	290.85	pc10
WBGene00022142	0.702219	0.514869	291.024	pc10
WBGene00010648	4.01907	0.642721	291.035	pc10
WBGene00010661	5.55717	1.83434	291.322	pc10
WBGene00023492	1.51033	0.83184	291.363	pc10
WBGene00015002	3.45904	1.53003	291.371	pc10
WBGene00000744	4.69804	1.00428	291.4	pc10
WBGene00000718	10.1933	1.03184	291.487	pc10
WBGene00018462	3.90111	0.596616	291.636	pc10
WBGene00021339	0.774409	0.634213	291.694	pc10
WBGene00019515	4.25516	1.42419	291.7	pc10
WBGene00004123	3.45655	1.28048	292.114	pc10
WBGene00044521	-0.182783	0.604146	292.507	pc10
WBGene00000717	6.74754	1.12182	292.548	pc10
WBGene00008476	3.59443	0.540387	292.599	pc10
WBGene00018166	2.99876	1.72571	292.677	pc10
WBGene00010998	1.40527	0.642645	292.77	pc10
WBGene00023503	1.81534	1.03824	293.512	pc10
WBGene00009547	3.21109	0.512841	293.592	pc10
WBGene00009807	0.0615844	0.526398	293.684	pc10
WBGene00004237	5.94681	1.19494	294.265	pc10
WBGene00002188	1.42777	0.593163	294.378	pc10
WBGene00023501	1.93464	1.36316	294.718	pc10
WBGene00016425	4.26367	1.11237	295.082	pc10
WBGene00020774	3.05244	1.27698	295.29	pc10
WBGene00011400	2.90845	0.993021	295.377	pc10
WBGene00018167	3.83278	1.82896	295.446	pc10
WBGene00015947	3.34512	0.659549	295.715	pc10
WBGene00019516	2.87047	0.850506	295.808	pc10
WBGene00011799	1.47306	0.947827	296.381	pc10
WBGene00007753	4.36772	0.691016	296.545	pc10
WBGene00013477	5.79058	0.669826	296.579	pc10
WBGene00000740	11.8603	0.953979	296.727	pc10
WBGene00015574	2.00108	1.15844	296.912	pc10
WBGene00007430	3.6888	0.843749	296.965	pc10
WBGene00008176	3.16589	1.03919	296.985	pc10
WBGene00003497	6.58059	1.30061	297.111	pc10
WBGene00000599	7.0255	1.02485	297.317	pc10
WBGene00271577	0.188132	0.702501	297.557	pc10
WBGene00017726	2.62173	0.830274	297.562	pc10
WBGene00007212	0.888743	1.06304	297.908	pc10
WBGene00000741	11.8427	0.966763	297.938	pc10
WBGene00010904	6.6499	1.29828	297.943	pc10
WBGene00000743	11.4825	0.942064	297.99	pc10
WBGene00016795	1.47318	1.14197	298.078	pc10
WBGene00011262	3.43418	1.13666	298.101	pc10
WBGene00008521	5.12961	1.30882	298.188	pc10
WBGene00000742	11.3803	0.936223	298.242	pc10
WBGene00015355	2.1218	1.78948	298.258	pc10
WBGene00007149	3.28552	1.99704	298.477	pc10
WBGene00015333	2.6669	0.934898	298.689	pc10
WBGene00007804	3.26835	2.18248	298.715	pc10
WBGene00011674	0.406009	0.902019	298.857	pc10
WBGene00020224	1.71554	1.0412	298.997	pc10
WBGene00014077	2.95691	0.833491	299.027	pc10
WBGene00008245	4.21099	2.07045	299.193	pc10
WBGene00022327	1.52776	0.629146	299.335	pc10
WBGene00045457	2.06138	1.43365	299.445	pc10
WBGene00008284	5.0287	1.27207	299.505	pc10
WBGene00000691	12.4791	0.996395	299.507	pc10
WBGene00009488	2.10521	1.01204	299.579	pc10
WBGene00000682	4.86661	0.930105	299.68	pc10
WBGene00009852	1.03682	0.752671	299.768	pc10
WBGene00019519	3.13163	0.585173	299.919	pc10
WBGene00006677	2.2765	0.636291	299.919	pc10
WBGene00004226	4.69272	1.04191	299.98	pc10
WBGene00000594	12.5896	0.996203	300.401	pc11
WBGene00009397	4.44131	0.505358	300.666	pc11
WBGene00022610	5.57305	0.52148	300.666	pc11
WBGene00014136	3.22483	0.561627	300.817	pc11
WBGene00001730	5.81639	2.56628	300.926	pc11
WBGene00013292	4.95917	0.790419	301.038	pc11
WBGene00013496	2.72142	0.995422	301.422	pc11
WBGene00016218	4.07279	0.630305	301.491	pc11
WBGene00010135	6.28836	1.87495	301.498	pc11
WBGene00022326	2.7536	0.690003	301.505	pc11
WBGene00010368	2.04156	1.70643	301.631	pc11
WBGene00000034	4.57589	1.63073	301.731	pc11
WBGene00044644	4.52656	2.00419	301.732	pc11
WBGene00022848	4.8389	0.551601	302.142	pc11
WBGene00008485	0.204702	0.544162	302.167	pc11
WBGene00010001	5.0819	1.5242	302.188	pc11
WBGene00022478	0.0526059	0.689938	302.207	pc11
WBGene00010822	3.91464	0.662222	302.398	pc11
WBGene00009090	5.06614	2.43869	302.53	pc11
WBGene00044032	1.3355	0.696609	302.836	pc11
WBGene00044779	2.49304	1.47591	303.075	pc11
WBGene00009433	3.35772	0.647763	303.377	pc11
WBGene00018742	2.84405	1.00887	303.566	pc11
WBGene00011927	3.07758	1.08492	303.578	pc11
WBGene00007541	6.524	2.29481	303.953	pc11
WBGene00019738	5.55118	1.18309	303.966	pc11
WBGene00008304	2.6729	1.32606	304.051	pc11
WBGene00020880	0.467742	0.507451	304.095	pc11
WBGene00000512	4.2601	1.10722	304.203	pc11
WBGene00007506	1.4068	0.948933	304.251	pc11
WBGene00012583	4.56653	1.41828	304.381	pc11
WBGene00013540	2.76322	1.19694	304.382	pc11
WBGene00013980	2.17902	1.08182	304.466	pc11
WBGene00015692	5.12351	0.789091	304.619	pc11
WBGene00004001	3.75875	1.17681	304.741	pc11
WBGene00007537	6.09419	2.33662	304.785	pc11
WBGene00007543	5.66	2.47463	304.832	pc11
WBGene00014173	5.12502	1.60025	304.868	pc11
WBGene00017968	5.1264	1.52715	305.002	pc11
WBGene00018646	1.63888	0.599876	305.015	pc11
WBGene00019967	3.48737	1.07217	305.271	pc11
WBGene00004003	4.96747	0.982237	305.374	pc11
WBGene00022743	5.69751	1.22835	305.402	pc11
WBGene00007544	6.23635	2.36161	305.599	pc11
WBGene00006611	1.85041	0.560913	305.91	pc11
WBGene00008073	1.87839	0.895557	305.931	pc11
WBGene00022496	3.26148	1.20124	306.024	pc11
WBGene00008255	2.86105	0.687956	306.093	pc11
WBGene00020720	1.78101	1.83825	306.177	pc11
WBGene00004124	4.02392	0.969296	306.181	pc11
WBGene00019660	3.74233	0.97202	306.286	pc11
WBGene00138724	1.35929	1.18273	306.287	pc11
WBGene00044206	3.24326	0.766861	306.293	pc11
WBGene00002265	6.33429	0.578941	306.33	pc11
WBGene00045507	5.11917	0.571474	306.541	pc11
WBGene00016505	5.28008	1.16282	306.58	pc11
WBGene00010660	4.51204	0.837127	306.661	pc11
WBGene00000732	7.95349	1.78212	306.995	pc11
WBGene00009595	4.69719	0.622997	307.093	pc11
WBGene00010127	-0.383122	0.528144	307.146	pc11
WBGene00006310	3.07107	1.42375	307.164	pc11
WBGene00019659	0.935207	0.517786	307.243	pc11
WBGene00015894	3.09653	1.05517	307.363	pc11
WBGene00000373	4.07136	1.17413	307.369	pc11
WBGene00004183	4.06503	0.644286	307.793	pc11
WBGene00019489	5.1808	1.80794	308.418	pc11
WBGene00008988	1.20991	0.729707	308.497	pc11
WBGene00001133	0.830168	0.578414	308.631	pc11
WBGene00018789	2.77121	1.21258	308.849	pc11
WBGene00020738	6.38962	0.668604	309.133	pc11
WBGene00044553	4.39414	0.576231	309.822	pc11
WBGene00022644	7.61228	0.780944	309.944	pc11
WBGene00021075	2.14223	0.909624	310.036	pc11
WBGene00050957	1.06154	0.734877	310.135	pc11
WBGene00004218	3.38301	1.0634	310.236	pc11
WBGene00195050	0.490994	0.911051	310.482	pc11
WBGene00016349	0.206839	0.537819	311.201	pc11
WBGene00019615	4.01118	0.673583	311.244	pc11
WBGene00017836	1.51393	0.851362	311.472	pc11
WBGene00017306	3.63903	0.627536	311.516	pc11
WBGene00001702	6.61655	1.27478	312.079	pc11
WBGene00194926	0.87786	0.682039	312.285	pc11
WBGene00006505	3.55046	1.08206	312.511	pc11
WBGene00271715	1.55983	0.693106	312.564	pc11
WBGene00005833	2.58252	1.09903	312.819	pc11
WBGene00009809	2.72002	0.600058	312.823	pc11
WBGene00021468	4.28171	0.523104	312.836	pc11
WBGene00012778	3.19398	0.942637	313.288	pc11
WBGene00017398	3.52229	0.649982	313.429	pc11
WBGene00006629	2.42278	1.14354	313.535	pc11
WBGene00003837	4.47367	0.884712	313.852	pc11
WBGene00017246	3.12592	0.68665	313.885	pc11
WBGene00010746	0.532904	0.807713	314.141	pc11
WBGene00044492	0.621203	0.678958	314.23	pc11
WBGene00020047	4.18666	1.54019	314.284	pc11
WBGene00021629	4.16986	0.598732	314.614	pc11
WBGene00011227	3.79868	0.930508	314.776	pc11
WBGene00004227	3.80328	0.805111	315.106	pc11
WBGene00015693	3.84215	0.524081	315.163	pc11
WBGene00014125	5.3644	1.42503	315.484	pc11
WBGene00020413	3.58904	0.963516	315.621	pc11
WBGene00005649	1.19689	0.743773	315.682	pc11
WBGene00018470	3.81823	1.25328	315.847	pc11
WBGene00022329	2.47659	0.666559	315.965	pc11
WBGene00018823	6.42502	0.599345	316.219	pc11
WBGene00021978	2.78456	1.06688	316.502	pc11
WBGene00021977	3.16964	1.06751	317.835	pc11
WBGene00000723	2.7801	0.934119	318.153	pc11
WBGene00012910	3.59722	0.603527	318.285	pc11
WBGene00013088	1.93887	0.620296	318.447	pc11
WBGene00009400	2.64966	0.600211	318.473	pc11
WBGene00014053	0.710703	0.946752	318.683	pc11
WBGene00010470	5.55861	0.902101	318.729	pc11
WBGene00002274	4.81986	0.563132	318.758	pc11
WBGene00003999	2.82691	1.07787	319.025	pc11
WBGene00003524	1.53578	1.08096	319.173	pc11
WBGene00044174	4.83118	2.12135	319.318	pc11
WBGene00000535	5.65801	0.50687	319.629	pc11
WBGene00044210	3.59713	1.62562	319.642	pc11
WBGene00044154	-0.0517057	0.549879	319.71	pc11
WBGene00007807	5.9449	0.746471	319.839	pc11
WBGene00021709	2.83152	0.798251	320.014	pc11
WBGene00007516	5.54275	1.10402	320.162	pc11
WBGene00017032	1.40778	0.783672	320.233	pc11
WBGene00017471	2.90292	1.11318	320.608	pc11
WBGene00020559	3.52271	0.879081	320.613	pc11
WBGene00017048	2.9986	0.725399	320.829	pc11
WBGene00004000	4.26853	1.13418	320.931	pc11
WBGene00012383	5.65106	0.698133	321.295	pc11
WBGene00045416	3.07578	1.73383	321.317	pc11
WBGene00020579	5.47756	0.861594	321.381	pc11
WBGene00015182	2.57647	1.66262	321.93	pc11
WBGene00044175	5.54543	2.241	322.18	pc11
WBGene00016728	4.1191	0.54451	322.251	pc11
WBGene00007073	4.13587	1.26994	322.595	pc11
WBGene00206485	0.773041	0.622913	322.639	pc11
WBGene00003762	8.5102	1.06994	322.647	pc11
WBGene00004008	4.82187	1.40991	322.844	pc11
WBGene00023423	1.14275	0.723183	322.897	pc11
WBGene00007817	3.37565	1.59234	322.973	pc11
WBGene00019854	1.64652	0.567058	323.413	pc11
WBGene00017093	1.57907	0.611584	323.416	pc11
WBGene00007462	1.46051	0.871765	323.764	pc11
WBGene00000733	8.53501	1.80013	323.886	pc11
WBGene00011445	4.12102	0.61533	323.981	pc11
WBGene00013266	6.20526	0.69053	323.997	pc11
WBGene00012185	2.90729	1.73718	324.036	pc11
WBGene00017160	2.85519	1.23203	324.193	pc11
WBGene00020335	4.5064	1.38018	324.233	pc11
WBGene00010940	2.89457	1.27024	324.257	pc11
WBGene00016147	1.79999	1.24374	324.261	pc11
WBGene00013806	3.51399	0.546304	324.365	pc11
WBGene00015695	4.81273	0.64463	324.477	pc11
WBGene00021979	1.77427	1.0128	324.712	pc11
WBGene00022567	0.64953	0.555325	324.83	pc11
WBGene00022131	4.91089	0.902234	324.89	pc11
WBGene00009490	0.886947	0.606753	325.025	pc11
WBGene00000656	5.04759	1.52908	325.065	pc11
WBGene00013602	1.34172	0.826071	325.339	pc11
WBGene00000298	5.369	0.598219	325.555	pc11
WBGene00195212	1.3781	0.910595	325.783	pc11
WBGene00019978	5.42627	0.941872	325.944	pc11
WBGene00015857	4.26644	1.61745	326.038	pc11
WBGene00019113	2.26831	0.964463	326.175	pc11
WBGene00009971	3.97411	0.956891	326.207	pc11
WBGene00003528	2.66181	1.45984	326.343	pc11
WBGene00002199	2.332	1.27408	326.385	pc11
WBGene00013896	3.34963	0.615732	326.493	pc11
WBGene00022782	4.48775	1.10763	326.568	pc11
WBGene00007124	7.58603	0.623241	326.569	pc11
WBGene00022040	1.10079	0.947117	326.793	pc11
WBGene00004119	4.59833	1.54017	326.854	pc11
WBGene00002195	2.16878	0.669863	326.91	pc11
WBGene00012886	1.49959	1.00298	326.989	pc11
WBGene00021943	4.5246	0.546531	327.067	pc11
WBGene00044536	2.77378	1.72663	327.451	pc11
WBGene00015262	0.0294567	0.502259	327.494	pc11
WBGene00013781	2.40236	0.560377	327.497	pc11
WBGene00013753	1.82808	0.533121	327.54	pc11
WBGene00012538	5.40672	0.643078	327.58	pc11
WBGene00006388	1.5044	0.587892	327.599	pc11
WBGene00010850	3.93664	0.594639	327.843	pc11
WBGene00044512	2.18412	1.17021	328.175	pc11
WBGene00004902	5.90144	0.575077	328.384	pc11
WBGene00017569	4.58957	1.93884	328.398	pc11
WBGene00009957	5.69777	0.913142	328.436	pc11
WBGene00007391	1.0046	0.828184	328.516	pc11
WBGene00013127	3.25584	1.29228	328.553	pc11
WBGene00020049	5.42949	1.57859	328.638	pc11
WBGene00008244	3.47389	1.73163	328.671	pc11
WBGene00010148	2.20059	0.781415	328.71	pc11
WBGene00271701	1.64725	0.524604	328.712	pc11
WBGene00022730	3.00614	1.11245	328.758	pc11
WBGene00020339	4.96923	1.44753	328.768	pc11
WBGene00009645	3.46111	0.538523	328.788	pc11
WBGene00003544	2.04415	1.05506	329.144	pc11
WBGene00044646	0.65528	0.813885	329.186	pc11
WBGene00013568	3.1053	0.728345	329.485	pc11
WBGene00007178	4.32728	0.846824	329.501	pc11
WBGene00016862	4.08847	0.616557	329.78	pc11
WBGene00022817	5.65429	1.21426	329.818	pc11
WBGene00007285	2.54195	0.652367	330.058	pc12
WBGene00012789	1.4338	0.515863	330.259	pc12
WBGene00044296	4.7791	0.853758	330.275	pc12
WBGene00000133	1.06776	1.10588	330.642	pc12
WBGene00010086	4.64788	0.956557	331.018	pc12
WBGene00012610	4.00144	0.576005	331.031	pc12
WBGene00194928	2.37602	1.45335	331.216	pc12
WBGene00009296	-0.272706	0.503244	331.227	pc12
WBGene00000176	5.00003	0.613549	331.231	pc12
WBGene00007480	3.39371	0.502996	331.466	pc12
WBGene00012143	3.24385	1.52468	331.495	pc12
WBGene00077764	3.76799	1.60846	331.536	pc12
WBGene00001789	2.14236	1.53265	331.542	pc12
WBGene00015332	4.62868	1.27758	331.571	pc12
WBGene00003551	1.28482	0.769151	331.628	pc12
WBGene00006685	2.50107	0.72018	331.759	pc12
WBGene00018403	3.72436	0.774673	332.168	pc12
WBGene00015085	1.95692	0.542013	332.173	pc12
WBGene00009978	4.64552	1.04645	332.195	pc12
[truncated: 223 more rows]
