# Supplementary material for: Single worm transcriptomics identifies a developmental core network of oscillating genes with deep conservation across nematodes
Source: HighWire-hosted journal article supplement (doi:10.1101/gr.275303.121), 2021-07-22
Supplement: Supplemental_Table_S5.xlsx [file Supplemental_Table_S5.xlsx]

## Sheet: gene_age_class_of_Ppa
Supplemental Table S5 Gene age classes of P. pacificus
ppa_locus	Gene_age_class
Contig0-snapTAU.72	p01
Contig106-snapTAU.42	p01
Contig131-snapTAU.60	p01
Contig16-snapTAU.209	p01
Contig28-snapTAU.271	p01
Contig35-snapTAU.242	p01
Contig40-snapTAU.183	p01
Contig42-snapTAU.2	p01
Contig495-snapTAU.3	p01
Contig52-snapTAU.119	p01
Contig600-snap.2	p01
Iso_D.15547.1	p01
Iso_D.4332.1	p01
Iso_D.9857.1	p01
PPA00001	p01
PPA00219	p01
PPA00430	p01
PPA00528	p01
PPA00687	p01
PPA00688	p01
PPA00891	p01
PPA01028	p01
PPA01056	p01
PPA01894	p01
PPA02000	p01
PPA02649	p01
PPA02686	p01
PPA02749	p01
PPA02801	p01
PPA02865	p01
PPA02988	p01
PPA03020	p01
PPA03141	p01
PPA03545	p01
PPA03736	p01
PPA04158	p01
PPA04351	p01
PPA05049	p01
PPA05331	p01
PPA05534	p01
PPA05903	p01
PPA06255	p01
PPA06285	p01
PPA06789	p01
PPA07778	p01
PPA07844	p01
PPA07924	p01
PPA08357	p01
PPA08853	p01
PPA08956	p01
PPA08958	p01
PPA09180	p01
PPA09981	p01
PPA11029	p01
PPA11431	p01
PPA11482	p01
PPA12148	p01
PPA12215	p01
PPA12219	p01
PPA12267	p01
PPA12294	p01
PPA12349	p01
PPA12417	p01
PPA12525	p01
PPA12712	p01
PPA12892	p01
PPA13550	p01
PPA14792	p01
PPA14795	p01
PPA15200	p01
PPA15246	p01
PPA15645	p01
PPA15663	p01
PPA15781	p01
PPA16398	p01
PPA17578	p01
PPA18421	p01
PPA18464	p01
PPA19147	p01
PPA19322	p01
PPA20215	p01
PPA20724	p01
PPA20758	p01
PPA20774	p01
PPA20775	p01
PPA21801	p01
PPA21876	p01
PPA21878	p01
PPA21903	p01
PPA21946	p01
PPA22173	p01
PPA22281	p01
PPA22535	p01
PPA22841	p01
PPA24736	p01
PPA25001	p01
PPA25096	p01
PPA25711	p01
PPA25789	p01
PPA25832	p01
PPA26284	p01
PPA26483	p01
PPA26565	p01
PPA27215	p01
PPA28363	p01
PPA29499	p01
PPA29760	p01
PPA29883	p01
PPA30099	p01
PPA30114	p01
PPA30986	p01
PPA31370	p01
PPA31667	p01
PPA31700	p01
PPA32235	p01
PPA32679	p01
PPA33321	p01
PPA33372	p01
PPA33511	p01
PPA33519	p01
PPA33524	p01
PPA33528	p01
PPA33535	p01
PPA33537	p01
PPA33538	p01
PPA33547	p01
PPA33560	p01
PPA33583	p01
PPA33586	p01
PPA33653	p01
PPA33657	p01
PPA33685	p01
PPA33692	p01
PPA33707	p01
PPA33730	p01
PPA33731	p01
PPA33732	p01
PPA33760	p01
PPA33761	p01
PPA33799	p01
PPA33800	p01
PPA33806	p01
PPA33832	p01
PPA33853	p01
PPA33863	p01
PPA33874	p01
PPA33880	p01
PPA33977	p01
PPA33986	p01
PPA33988	p01
PPA34049	p01
PPA34061	p01
PPA34062	p01
PPA34063	p01
PPA34076	p01
PPA34080	p01
PPA34101	p01
PPA34135	p01
PPA34140	p01
PPA34165	p01
PPA34166	p01
PPA34169	p01
PPA34182	p01
PPA34189	p01
PPA34202	p01
PPA34209	p01
PPA34234	p01
PPA34250	p01
PPA34252	p01
PPA34254	p01
PPA34256	p01
PPA34264	p01
PPA34282	p01
PPA34368	p01
PPA34417	p01
PPA34423	p01
PPA34438	p01
PPA34450	p01
PPA34458	p01
PPA34462	p01
PPA34471	p01
PPA34490	p01
PPA34492	p01
PPA34493	p01
PPA34494	p01
PPA34508	p01
PPA34578	p01
PPA34582	p01
PPA34608	p01
PPA34614	p01
PPA34648	p01
PPA34651	p01
PPA34691	p01
PPA34695	p01
PPA34739	p01
PPA34745	p01
PPA34751	p01
PPA34823	p01
PPA34863	p01
PPA34869	p01
PPA34872	p01
PPA34886	p01
PPA34900	p01
PPA34949	p01
PPA35021	p01
PPA35022	p01
PPA35025	p01
PPA35099	p01
PPA35111	p01
PPA35138	p01
PPA35213	p01
PPA35247	p01
PPA35249	p01
PPA35265	p01
PPA35299	p01
PPA35340	p01
PPA35514	p01
PPA35609	p01
PPA35696	p01
PPA35788	p01
PPA35791	p01
PPA35806	p01
PPA35857	p01
PPA35871	p01
PPA35899	p01
PPA35916	p01
PPA35940	p01
PPA35970	p01
PPA36003	p01
PPA36007	p01
PPA36011	p01
PPA36016	p01
PPA36061	p01
PPA36079	p01
PPA36164	p01
PPA36298	p01
PPA36320	p01
PPA36329	p01
PPA36393	p01
PPA36400	p01
PPA36422	p01
PPA36430	p01
PPA36498	p01
PPA36576	p01
PPA36594	p01
PPA36702	p01
PPA36703	p01
PPA36707	p01
PPA36710	p01
PPA36749	p01
PPA36778	p01
PPA36857	p01
PPA36858	p01
PPA36872	p01
PPA36873	p01
PPA36882	p01
PPA36952	p01
PPA36962	p01
PPA36963	p01
PPA36964	p01
PPA37018	p01
PPA37040	p01
PPA37041	p01
PPA37112	p01
PPA37123	p01
PPA37125	p01
PPA37167	p01
PPA37188	p01
PPA37190	p01
PPA37209	p01
PPA37212	p01
PPA37235	p01
PPA37243	p01
PPA37245	p01
PPA37247	p01
PPA37279	p01
PPA37293	p01
PPA37374	p01
PPA37399	p01
PPA37441	p01
PPA37455	p01
PPA37530	p01
PPA37552	p01
PPA37620	p01
PPA37627	p01
PPA37636	p01
PPA37638	p01
PPA37639	p01
PPA37644	p01
PPA37658	p01
PPA37660	p01
PPA37661	p01
PPA37664	p01
PPA37740	p01
PPA37757	p01
PPA37761	p01
PPA37790	p01
PPA37886	p01
PPA37896	p01
PPA37912	p01
PPA37917	p01
PPA37918	p01
PPA37950	p01
PPA37981	p01
PPA37997	p01
PPA38049	p01
PPA38059	p01
PPA38066	p01
PPA38078	p01
PPA38105	p01
PPA38137	p01
PPA38259	p01
PPA38277	p01
PPA38285	p01
PPA38325	p01
PPA38327	p01
PPA38374	p01
PPA38384	p01
PPA38420	p01
PPA38466	p01
PPA38505	p01
PPA38605	p01
PPA38681	p01
PPA38692	p01
PPA38695	p01
PPA38707	p01
PPA38712	p01
PPA38729	p01
PPA38740	p01
PPA38754	p01
PPA38772	p01
PPA38773	p01
PPA38794	p01
PPA38796	p01
PPA38812	p01
PPA38813	p01
PPA38839	p01
PPA38844	p01
PPA38854	p01
PPA38862	p01
PPA38917	p01
PPA38925	p01
PPA38968	p01
PPA38983	p01
PPA38989	p01
PPA39023	p01
PPA39051	p01
PPA39053	p01
PPA39079	p01
PPA39092	p01
PPA39196	p01
PPA39324	p01
PPA39333	p01
PPA39334	p01
PPA39347	p01
PPA39363	p01
PPA39369	p01
PPA39372	p01
PPA39457	p01
PPA39536	p01
PPA39552	p01
PPA39564	p01
PPA39589	p01
PPA39640	p01
PPA39641	p01
PPA39643	p01
PPA39670	p01
PPA39713	p01
PPA39714	p01
PPA39740	p01
PPA39762	p01
PPA39820	p01
PPA39844	p01
PPA39872	p01
PPA39881	p01
PPA39913	p01
PPA39989	p01
PPA39992	p01
PPA40003	p01
PPA40009	p01
PPA40069	p01
PPA40105	p01
PPA40109	p01
PPA40156	p01
PPA40179	p01
PPA40209	p01
PPA40211	p01
PPA40212	p01
PPA40378	p01
PPA40530	p01
PPA40665	p01
PPA40706	p01
PPA40733	p01
PPA40752	p01
PPA40830	p01
PPA40856	p01
PPA40924	p01
PPA40930	p01
PPA40949	p01
PPA40951	p01
PPA40987	p01
PPA41098	p01
PPA41107	p01
PPA41181	p01
PPA41182	p01
PPA41187	p01
PPA41259	p01
PPA41267	p01
PPA41290	p01
PPA41293	p01
PPA41296	p01
PPA41306	p01
PPA41359	p01
PPA41371	p01
PPA41387	p01
PPA41418	p01
PPA41446	p01
PPA41499	p01
PPA41522	p01
PPA41523	p01
PPA41531	p01
PPA41610	p01
PPA41613	p01
PPA41619	p01
PPA41624	p01
PPA41646	p01
PPA41647	p01
PPA41652	p01
PPA41663	p01
PPA41665	p01
PPA41668	p01
PPA41701	p01
PPA41708	p01
PPA41739	p01
PPA41750	p01
PPA41900	p01
PPA41913	p01
PPA41923	p01
PPA41924	p01
PPA41947	p01
PPA41949	p01
PPA42003	p01
PPA42020	p01
PPA42083	p01
PPA42085	p01
PPA42133	p01
PPA42135	p01
PPA42138	p01
PPA42175	p01
PPA42207	p01
PPA42208	p01
PPA42265	p01
PPA42274	p01
PPA42291	p01
PPA42292	p01
PPA42306	p01
PPA42307	p01
PPA42359	p01
PPA42402	p01
PPA42418	p01
PPA42439	p01
PPA42462	p01
PPA42475	p01
PPA42490	p01
PPA42541	p01
PPA42723	p01
PPA42795	p01
PPA42826	p01
PPA42835	p01
PPA42845	p01
PPA42847	p01
PPA42850	p01
PPA42925	p01
PPA42979	p01
PPA42980	p01
PPA43069	p01
PPA43070	p01
PPA43071	p01
PPA43074	p01
PPA43096	p01
PPA43097	p01
PPA43098	p01
PPA43126	p01
PPA43140	p01
PPA43188	p01
PPA43191	p01
PPA43195	p01
PPA43215	p01
PPA43224	p01
PPA43242	p01
PPA43412	p01
PPA43420	p01
PPA43433	p01
PPA43452	p01
PPA43572	p01
PPA43591	p01
PPA43593	p01
PPA43653	p01
PPA43659	p01
PPA43703	p01
PPA43704	p01
PPA43746	p01
PPA43757	p01
PPA43758	p01
PPA43797	p01
PPA43843	p01
PPA43850	p01
PPA43878	p01
PPA43918	p01
PPA44019	p01
PPA44046	p01
PPA44092	p01
PPA44094	p01
PPA44119	p01
PPA44135	p01
PPA44165	p01
PPA44173	p01
PPA44184	p01
PPA44189	p01
PPA44195	p01
PPA44198	p01
PPA44238	p01
PPA44239	p01
PPA44250	p01
PPA44279	p01
PPA44337	p01
PPA44339	p01
PPA44365	p01
PPA44386	p01
PPA44420	p01
PPA44466	p01
PPA44487	p01
PPA44489	p01
PPA44509	p01
PPA44512	p01
PPA44513	p01
PPA44518	p01
PPA44580	p01
PPA44595	p01
PPA44663	p01
PPA44676	p01
PPA44697	p01
PPA44753	p01
PPA44759	p01
PPA44764	p01
PPA44782	p01
PPA44809	p01
PPA44831	p01
PPA44839	p01
PPA44845	p01
PPA44854	p01
PPA44855	p01
PPA44864	p01
PPA44867	p01
PPA44871	p01
PPA44880	p01
PPA44889	p01
PPA44890	p01
PPA44935	p01
PPA44945	p01
PPA44962	p01
PPA44991	p01
PPA45049	p01
PPA45054	p01
PPA45090	p01
PPA45229	p01
PPA45231	p01
PPA45235	p01
PPA45249	p01
PPA45288	p01
PPA45289	p01
PPA45298	p01
PPA45332	p01
PPA45333	p01
PPA45334	p01
PPA45335	p01
PPA45336	p01
PPA45337	p01
PPA45338	p01
PPA45339	p01
PPA45340	p01
PPA45341	p01
PPA45342	p01
PPA45359	p01
PPA45383	p01
PPA45388	p01
PPA45425	p01
PPA45435	p01
PPA45476	p01
PPA45478	p01
PPA45484	p01
PPA45485	p01
PPA45487	p01
PPA45525	p01
PPA45529	p01
PPA45544	p01
PPA45580	p01
PPA45641	p01
PPA45647	p01
PPA45661	p01
PPA45662	p01
PPA45675	p01
PPA45680	p01
PPA45709	p01
PPA45710	p01
PPA45727	p01
PPA45734	p01
PPA45759	p01
PPA45760	p01
PPA45763	p01
PPA45764	p01
PPA45770	p01
PPA45839	p01
PPA45843	p01
PPA45844	p01
PPA45869	p01
PPA45942	p01
PPA45965	p01
PPA45998	p01
PPA46009	p01
PPA46027	p01
PPA46067	p01
PPA46081	p01
PPA46139	p01
PPA46140	p01
PPA46152	p01
PPA46207	p01
PPA46254	p01
PPA46263	p01
PPA46278	p01
PPA46280	p01
PPA46312	p01
PPA46367	p01
PPA46368	p01
PPA46374	p01
PPA46379	p01
PPA46410	p01
PPA46459	p01
PPA46469	p01
PPA46470	p01
UMM-S245-4.44-mRNA-1_dhs_1	p01
ppa_stranded_DN12679_c1_g1_i1	p01
ppa_stranded_DN1817_c0_g1_i1	p01
ppa_stranded_DN18370_c0_g1_i1	p01
ppa_stranded_DN21579_c0_g1_i1	p01
ppa_stranded_DN21824_c0_g1_i5	p01
ppa_stranded_DN21824_c0_g1_i6	p01
ppa_stranded_DN22009_c0_g1_i2	p01
ppa_stranded_DN23167_c0_g1_i1	p01
ppa_stranded_DN23167_c0_g3_i1	p01
ppa_stranded_DN24110_c0_g1_i1	p01
ppa_stranded_DN27030_c0_g1_i2	p01
ppa_stranded_DN29144_c0_g2_i1	p01
ppa_stranded_DN29275_c0_g1_i3	p01
ppa_stranded_DN30161_c4_g1_i2	p01
ppa_stranded_DN30161_c4_g1_i3	p01
ppa_stranded_DN30264_c1_g2_i3	p01
ppa_stranded_DN30451_c3_g2_i1	p01
ppa_stranded_DN30451_c3_g2_i2	p01
ppa_stranded_DN31172_c0_g1_i10	p01
ppa_stranded_DN31172_c0_g1_i4	p01
ppa_stranded_DN31208_c0_g4_i20	p01
ppa_stranded_DN31254_c1_g7_i7	p01
ppa_stranded_DN31382_c0_g3_i1	p01
ppa_stranded_DN31599_c0_g2_i4	p01
ppa_stranded_DN32651_c0_g1_i1	p01
ppa_stranded_DN32878_c0_g1_i1	p01
ppa_stranded_DN33656_c0_g1_i1	p01
ppa_stranded_DN33759_c0_g1_i1	p01
ppa_stranded_DN34800_c0_g1_i1	p01
ppa_stranded_DN40101_c0_g1_i1	p01
ppa_stranded_DN4090_c0_g2_i1	p01
ppa_stranded_DN41292_c0_g1_i1	p01
ppa_stranded_DN48697_c0_g1_i1	p01
ppa_stranded_DN8465_c0_g2_i1	p01
ppa_stranded_DN9379_c0_g1_i1	p01
Contig10-snapTAU.91	p02
Contig103-snapTAU.33	p02
Contig5-snapTAU.142	p02
Contig6-snapTAU.312	p02
Contig79-snapTAU.70	p02
Contig79-snapTAU.71	p02
Contig91-snapTAU.108	p02
Contig91-snapTAU.88	p02
Iso_D.15219.1	p02
Iso_D.6349.3	p02
PPA00031	p02
PPA00288	p02
PPA00466	p02
PPA00736	p02
PPA01740	p02
PPA01947	p02
PPA02355	p02
PPA02827	p02
PPA03403	p02
PPA03514	p02
PPA03911	p02
PPA03972	p02
PPA04014	p02
PPA04136	p02
PPA04780	p02
PPA05068	p02
PPA05192	p02
PPA05268	p02
PPA05298	p02
PPA05430	p02
PPA05431	p02
PPA05452	p02
PPA05624	p02
PPA05626	p02
PPA05655	p02
PPA05657	p02
PPA06152	p02
PPA06297	p02
PPA06522	p02
PPA07041	p02
PPA07387	p02
PPA08066	p02
PPA08338	p02
PPA08346	p02
PPA08404	p02
PPA08622	p02
PPA09196	p02
PPA09503	p02
PPA09789	p02
PPA10159	p02
PPA10240	p02
PPA10639	p02
PPA10757	p02
PPA12527	p02
PPA12901	p02
PPA14067	p02
PPA14568	p02
PPA15197	p02
PPA15365	p02
PPA15377	p02
PPA15451	p02
PPA15569	p02
PPA15777	p02
PPA16141	p02
PPA16171	p02
PPA16479	p02
PPA16814	p02
PPA16956	p02
PPA17316	p02
PPA17360	p02
PPA17542	p02
PPA17588	p02
PPA17682	p02
PPA17794	p02
PPA18163	p02
PPA18204	p02
PPA19476	p02
PPA19613	p02
PPA19635	p02
PPA19746	p02
PPA19992	p02
PPA20258	p02
PPA20568	p02
PPA20829	p02
PPA21040	p02
PPA21373	p02
PPA22006	p02
PPA22182	p02
PPA22908	p02
PPA23046	p02
PPA23453	p02
PPA23461	p02
PPA23504	p02
PPA23660	p02
PPA23877	p02
PPA23878	p02
PPA23879	p02
PPA23941	p02
PPA23993	p02
PPA24224	p02
PPA24352	p02
PPA24384	p02
PPA24445	p02
PPA24568	p02
PPA24682	p02
PPA25446	p02
PPA25650	p02
PPA25784	p02
PPA25831	p02
PPA25860	p02
PPA25937	p02
PPA26075	p02
PPA26305	p02
PPA26534	p02
PPA26849	p02
PPA26920	p02
PPA27293	p02
PPA27617	p02
PPA27725	p02
PPA27922	p02
PPA28066	p02
PPA28756	p02
PPA29260	p02
PPA29792	p02
PPA29796	p02
PPA30000	p02
PPA30175	p02
PPA30420	p02
PPA30548	p02
PPA30787	p02
PPA30794	p02
PPA30847	p02
PPA30982	p02
PPA31197	p02
PPA31218	p02
PPA31269	p02
PPA31326	p02
PPA31568	p02
PPA31681	p02
PPA31860	p02
PPA32031	p02
PPA32147	p02
PPA32224	p02
PPA32398	p02
PPA32763	p02
PPA32787	p02
PPA32891	p02
PPA32973	p02
PPA32992	p02
PPA33038	p02
PPA33159	p02
PPA33186	p02
PPA33239	p02
PPA33306	p02
PPA33383	p02
PPA33497	p02
PPA33502	p02
PPA33554	p02
PPA33562	p02
PPA33639	p02
PPA33642	p02
PPA33708	p02
PPA33834	p02
PPA33841	p02
PPA33843	p02
PPA33873	p02
PPA33887	p02
PPA33894	p02
PPA34038	p02
PPA34081	p02
PPA34172	p02
PPA34225	p02
PPA34286	p02
PPA34298	p02
PPA34352	p02
PPA34355	p02
PPA34373	p02
PPA34378	p02
PPA34467	p02
PPA34507	p02
PPA34528	p02
PPA34554	p02
PPA34557	p02
PPA34560	p02
PPA34572	p02
PPA34588	p02
PPA34613	p02
PPA34615	p02
PPA34654	p02
PPA34668	p02
PPA34699	p02
PPA34731	p02
PPA34775	p02
PPA34830	p02
PPA34831	p02
PPA34833	p02
PPA34848	p02
PPA34930	p02
PPA35033	p02
PPA35100	p02
PPA35109	p02
PPA35146	p02
PPA35155	p02
PPA35161	p02
PPA35163	p02
PPA35189	p02
PPA35210	p02
PPA35224	p02
PPA35267	p02
PPA35323	p02
PPA35327	p02
PPA35339	p02
PPA35348	p02
PPA35373	p02
PPA35406	p02
PPA35417	p02
PPA35479	p02
PPA35498	p02
PPA35503	p02
PPA35504	p02
PPA35506	p02
PPA35517	p02
PPA35520	p02
PPA35572	p02
PPA35675	p02
PPA35764	p02
PPA35775	p02
PPA35821	p02
PPA35889	p02
PPA35900	p02
PPA35906	p02
PPA35912	p02
PPA35935	p02
PPA35942	p02
PPA35989	p02
PPA36000	p02
PPA36049	p02
PPA36067	p02
PPA36084	p02
PPA36111	p02
PPA36148	p02
PPA36180	p02
PPA36218	p02
PPA36267	p02
PPA36289	p02
PPA36295	p02
PPA36299	p02
PPA36300	p02
PPA36305	p02
PPA36333	p02
PPA36344	p02
PPA36395	p02
PPA36480	p02
PPA36481	p02
PPA36512	p02
PPA36513	p02
PPA36535	p02
PPA36544	p02
PPA36568	p02
PPA36586	p02
PPA36587	p02
PPA36619	p02
PPA36633	p02
PPA36823	p02
PPA36861	p02
PPA36893	p02
PPA36923	p02
PPA36948	p02
PPA36954	p02
PPA36990	p02
PPA37006	p02
PPA37013	p02
PPA37020	p02
PPA37026	p02
PPA37054	p02
PPA37055	p02
PPA37102	p02
PPA37135	p02
PPA37170	p02
PPA37226	p02
PPA37244	p02
PPA37288	p02
PPA37297	p02
PPA37301	p02
PPA37430	p02
PPA37448	p02
PPA37553	p02
PPA37559	p02
PPA37578	p02
PPA37585	p02
PPA37700	p02
PPA37723	p02
PPA37773	p02
PPA37859	p02
PPA37873	p02
PPA37891	p02
PPA37894	p02
PPA37895	p02
PPA37903	p02
PPA37907	p02
PPA37909	p02
PPA37973	p02
PPA37974	p02
PPA37993	p02
PPA38047	p02
PPA38048	p02
PPA38091	p02
PPA38124	p02
PPA38151	p02
PPA38157	p02
PPA38158	p02
PPA38178	p02
PPA38192	p02
PPA38196	p02
PPA38204	p02
PPA38232	p02
PPA38246	p02
PPA38254	p02
PPA38324	p02
PPA38329	p02
PPA38334	p02
PPA38335	p02
PPA38340	p02
PPA38356	p02
PPA38364	p02
PPA38445	p02
PPA38456	p02
PPA38538	p02
PPA38539	p02
PPA38602	p02
PPA38690	p02
PPA38691	p02
PPA38696	p02
PPA38702	p02
PPA38705	p02
PPA38824	p02
PPA38889	p02
PPA38893	p02
PPA38894	p02
PPA38900	p02
PPA38945	p02
PPA38971	p02
PPA39046	p02
PPA39048	p02
PPA39089	p02
PPA39122	p02
PPA39132	p02
PPA39213	p02
PPA39289	p02
PPA39337	p02
PPA39339	p02
PPA39342	p02
PPA39378	p02
PPA39389	p02
PPA39430	p02
PPA39455	p02
PPA39462	p02
PPA39476	p02
PPA39590	p02
PPA39613	p02
PPA39615	p02
PPA39697	p02
PPA39710	p02
PPA39745	p02
PPA39766	p02
PPA40008	p02
PPA40070	p02
PPA40098	p02
PPA40099	p02
PPA40107	p02
PPA40135	p02
PPA40313	p02
PPA40331	p02
PPA40349	p02
PPA40529	p02
PPA40557	p02
PPA40617	p02
PPA40664	p02
PPA40724	p02
PPA40940	p02
PPA40959	p02
PPA40998	p02
PPA41072	p02
PPA41082	p02
PPA41097	p02
PPA41158	p02
PPA41159	p02
PPA41278	p02
PPA41311	p02
PPA41348	p02
PPA41392	p02
PPA41426	p02
PPA41430	p02
PPA41450	p02
PPA41462	p02
PPA41483	p02
PPA41532	p02
PPA41628	p02
PPA41644	p02
PPA41733	p02
PPA41738	p02
PPA41768	p02
PPA41772	p02
PPA41776	p02
PPA41780	p02
PPA41843	p02
PPA41991	p02
PPA41995	p02
PPA42016	p02
PPA42028	p02
PPA42035	p02
PPA42043	p02
PPA42129	p02
PPA42136	p02
PPA42161	p02
PPA42218	p02
PPA42223	p02
PPA42224	p02
PPA42267	p02
PPA42401	p02
PPA42465	p02
PPA42496	p02
PPA42520	p02
PPA42537	p02
PPA42550	p02
PPA42573	p02
PPA42636	p02
PPA42687	p02
PPA42761	p02
PPA42762	p02
PPA42792	p02
PPA42817	p02
PPA42866	p02
PPA42877	p02
PPA42908	p02
PPA42930	p02
PPA42946	p02
PPA43052	p02
PPA43105	p02
PPA43110	p02
PPA43151	p02
PPA43157	p02
PPA43163	p02
PPA43166	p02
PPA43177	p02
PPA43230	p02
PPA43243	p02
PPA43247	p02
PPA43251	p02
PPA43252	p02
PPA43267	p02
PPA43281	p02
PPA43337	p02
PPA43359	p02
PPA43362	p02
PPA43373	p02
PPA43382	p02
PPA43387	p02
PPA43390	p02
PPA43476	p02
PPA43502	p02
PPA43538	p02
PPA43548	p02
PPA43549	p02
PPA43550	p02
PPA43559	p02
PPA43577	p02
PPA43592	p02
PPA43595	p02
PPA43622	p02
PPA43643	p02
PPA43654	p02
PPA43698	p02
PPA43712	p02
PPA43736	p02
PPA43792	p02
PPA43793	p02
PPA43799	p02
PPA43807	p02
PPA43825	p02
PPA43827	p02
PPA43829	p02
PPA43830	p02
PPA43832	p02
PPA43840	p02
PPA43845	p02
PPA43852	p02
PPA43862	p02
PPA43905	p02
PPA43915	p02
PPA43919	p02
PPA43922	p02
PPA43930	p02
PPA43931	p02
PPA43933	p02
PPA43952	p02
PPA43954	p02
PPA44011	p02
PPA44047	p02
PPA44078	p02
PPA44122	p02
PPA44133	p02
PPA44152	p02
PPA44153	p02
PPA44175	p02
PPA44182	p02
PPA44213	p02
PPA44217	p02
PPA44230	p02
PPA44306	p02
PPA44340	p02
PPA44360	p02
PPA44371	p02
PPA44382	p02
PPA44383	p02
PPA44410	p02
PPA44413	p02
PPA44415	p02
PPA44417	p02
PPA44467	p02
PPA44468	p02
PPA44469	p02
PPA44510	p02
PPA44520	p02
PPA44530	p02
PPA44535	p02
PPA44584	p02
PPA44586	p02
PPA44593	p02
PPA44620	p02
PPA44634	p02
PPA44652	p02
PPA44657	p02
PPA44669	p02
PPA44675	p02
PPA44692	p02
PPA44735	p02
PPA44757	p02
PPA44771	p02
PPA44810	p02
PPA44848	p02
PPA44870	p02
PPA44881	p02
PPA44923	p02
PPA44936	p02
PPA45001	p02
PPA45006	p02
PPA45010	p02
PPA45019	p02
PPA45074	p02
PPA45099	p02
PPA45112	p02
PPA45134	p02
PPA45139	p02
PPA45167	p02
PPA45172	p02
PPA45178	p02
PPA45187	p02
PPA45189	p02
PPA45212	p02
PPA45213	p02
PPA45233	p02
PPA45251	p02
PPA45255	p02
PPA45278	p02
PPA45291	p02
PPA45353	p02
PPA45413	p02
PPA45427	p02
PPA45445	p02
PPA45475	p02
PPA45515	p02
PPA45583	p02
PPA45659	p02
PPA45664	p02
PPA45688	p02
PPA45733	p02
PPA45735	p02
PPA45746	p02
PPA45808	p02
PPA45820	p02
PPA45826	p02
PPA45830	p02
PPA45852	p02
PPA45859	p02
PPA45876	p02
PPA45900	p02
PPA45911	p02
PPA45918	p02
PPA45932	p02
PPA46021	p02
PPA46080	p02
PPA46088	p02
PPA46089	p02
PPA46099	p02
PPA46130	p02
PPA46135	p02
PPA46136	p02
PPA46164	p02
PPA46188	p02
PPA46212	p02
PPA46252	p02
PPA46292	p02
PPA46419	p02
UMM-S2859-11.64-mRNA-1_truncated_curated	p02
ppa_stranded_DN12271_c0_g1_i1	p02
ppa_stranded_DN16928_c0_g2_i1	p02
ppa_stranded_DN18087_c0_g1_i1	p02
ppa_stranded_DN18184_c0_g1_i1	p02
ppa_stranded_DN21671_c0_g2_i2	p02
ppa_stranded_DN23218_c0_g1_i1	p02
ppa_stranded_DN24277_c0_g1_i1	p02
ppa_stranded_DN25048_c0_g1_i3	p02
ppa_stranded_DN26687_c0_g1_i1	p02
ppa_stranded_DN27812_c0_g3_i2	p02
ppa_stranded_DN28885_c0_g2_i1	p02
ppa_stranded_DN29075_c1_g1_i1	p02
ppa_stranded_DN29470_c0_g3_i4	p02
ppa_stranded_DN29660_c0_g1_i1	p02
ppa_stranded_DN30093_c0_g8_i1	p02
ppa_stranded_DN30723_c0_g1_i3	p02
ppa_stranded_DN30723_c0_g2_i1	p02
ppa_stranded_DN30943_c4_g4_i1	p02
ppa_stranded_DN31286_c1_g3_i3	p02
ppa_stranded_DN31315_c0_g2_i2	p02
ppa_stranded_DN31503_c0_g2_i7	p02
ppa_stranded_DN31531_c0_g1_i4	p02
ppa_stranded_DN31646_c3_g9_i1	p02
ppa_stranded_DN32038_c0_g1_i1	p02
ppa_stranded_DN3207_c0_g1_i1	p02
ppa_stranded_DN34976_c0_g1_i1	p02
ppa_stranded_DN4375_c0_g2_i1	p02
ppa_stranded_DN44692_c0_g1_i1	p02
ppa_stranded_DN60_c0_g1_i1	p02
ppa_stranded_DN684_c0_g1_i1	p02
ppa_stranded_DN9341_c0_g1_i1	p02
Contig1-snapTAU.376	p03
Contig16-snapTAU.263	p03
Contig17-snapTAU.226	p03
Contig19-snapTAU.1	p03
Contig19-snapTAU.304	p03
Contig238-snapTAU.3	p03
Contig3-snapTAU.319	p03
Contig51-snapTAU.159	p03
Contig52-snapTAU.37	p03
Contig7-snapTAU.336	p03
Contig90-snapTAU.43	p03
Contig91-snapTAU.16	p03
Iso_D.12072.3	p03
Iso_D.4384.4	p03
Iso_D.4497.2	p03
Iso_D.6071.3	p03
Iso_D.6972.1	p03
Iso_D.7055.1	p03
Iso_D.7059.1	p03
PPA00121	p03
PPA00134	p03
PPA00186	p03
PPA00265	p03
PPA00471	p03
PPA00550	p03
PPA00596	p03
PPA00597	p03
PPA00920	p03
PPA01049	p03
PPA01050	p03
PPA01147	p03
PPA01148	p03
PPA01149	p03
PPA01200	p03
PPA01247	p03
PPA01295	p03
PPA01409	p03
PPA01423	p03
PPA01636	p03
PPA01637	p03
PPA01641	p03
PPA01659	p03
PPA01704	p03
PPA01941	p03
PPA02295	p03
PPA02451	p03
PPA02597	p03
PPA02798	p03
PPA02823	p03
PPA02904	p03
PPA02956	p03
PPA02958	p03
PPA02969	p03
PPA03002	p03
PPA03083	p03
PPA03123	p03
PPA03392	p03
PPA03397	p03
PPA03411	p03
PPA03437	p03
PPA03460	p03
PPA03478	p03
PPA03562	p03
PPA03580	p03
PPA03606	p03
PPA03608	p03
PPA03609	p03
PPA03611	p03
PPA03635	p03
PPA03639	p03
PPA03661	p03
PPA03704	p03
PPA03738	p03
PPA03747	p03
PPA03828	p03
PPA03874	p03
PPA03907	p03
PPA03995	p03
PPA04015	p03
PPA04038	p03
PPA04079	p03
PPA04274	p03
PPA04287	p03
PPA04288	p03
PPA04293	p03
PPA04393	p03
PPA04406	p03
PPA04470	p03
PPA04471	p03
PPA04595	p03
PPA04603	p03
PPA04705	p03
PPA04712	p03
PPA04773	p03
PPA04864	p03
PPA05060	p03
PPA05061	p03
PPA05084	p03
PPA05091	p03
PPA05097	p03
PPA05212	p03
PPA05246	p03
PPA05252	p03
PPA05292	p03
PPA05318	p03
PPA05352	p03
PPA05353	p03
PPA05427	p03
PPA05433	p03
PPA05619	p03
PPA05621	p03
PPA05668	p03
PPA05671	p03
PPA05702	p03
PPA06185	p03
PPA06186	p03
PPA06199	p03
PPA06268	p03
PPA06296	p03
PPA06299	p03
PPA06300	p03
PPA06303	p03
PPA06337	p03
PPA06354	p03
PPA06355	p03
PPA06801	p03
PPA07047	p03
PPA07063	p03
PPA07101	p03
PPA07102	p03
PPA07104	p03
PPA07319	p03
PPA07321	p03
PPA07328	p03
PPA07346	p03
PPA07361	p03
PPA07383	p03
PPA07386	p03
PPA07472	p03
PPA07484	p03
PPA07501	p03
PPA07511	p03
PPA07512	p03
PPA07515	p03
PPA07526	p03
PPA07535	p03
PPA07536	p03
PPA07685	p03
PPA07691	p03
PPA07708	p03
PPA07726	p03
PPA07747	p03
PPA08002	p03
PPA08009	p03
PPA08021	p03
PPA08358	p03
PPA08616	p03
PPA08641	p03
PPA08642	p03
PPA08730	p03
PPA08817	p03
PPA08953	p03
PPA08968	p03
PPA09157	p03
PPA09194	p03
PPA09203	p03
PPA09237	p03
PPA09238	p03
PPA09240	p03
PPA09301	p03
PPA09307	p03
PPA09333	p03
PPA09372	p03
PPA09453	p03
PPA09575	p03
PPA09594	p03
PPA09604	p03
PPA09775	p03
PPA09787	p03
PPA09810	p03
PPA09827	p03
PPA09830	p03
PPA09834	p03
PPA09836	p03
PPA09837	p03
PPA09939	p03
PPA10114	p03
PPA10186	p03
PPA10190	p03
PPA10201	p03
PPA10241	p03
PPA10328	p03
PPA10344	p03
PPA10402	p03
PPA10462	p03
PPA10495	p03
PPA10498	p03
PPA10505	p03
PPA10551	p03
PPA10559	p03
PPA10579	p03
PPA10580	p03
PPA10675	p03
PPA10756	p03
PPA10798	p03
PPA11060	p03
PPA11136	p03
PPA11246	p03
PPA11375	p03
PPA11417	p03
PPA11477	p03
PPA11527	p03
PPA11528	p03
PPA11657	p03
PPA11726	p03
PPA11814	p03
PPA11815	p03
PPA11995	p03
PPA12152	p03
PPA12179	p03
PPA12190	p03
PPA12202	p03
PPA12207	p03
PPA12209	p03
PPA12213	p03
PPA12314	p03
PPA12329	p03
PPA12344	p03
PPA12376	p03
PPA12588	p03
PPA12647	p03
PPA12656	p03
PPA12678	p03
PPA12680	p03
PPA12696	p03
PPA12746	p03
PPA12787	p03
PPA12864	p03
PPA12907	p03
PPA13024	p03
PPA13173	p03
PPA13303	p03
PPA13345	p03
PPA13399	p03
PPA13403	p03
PPA13533	p03
PPA13664	p03
PPA13692	p03
PPA13694	p03
PPA13771	p03
PPA13777	p03
PPA13887	p03
PPA13889	p03
PPA13918	p03
PPA14220	p03
PPA14288	p03
PPA14331	p03
PPA14468	p03
PPA14497	p03
PPA14565	p03
PPA14611	p03
PPA14713	p03
PPA14718	p03
PPA14728	p03
PPA14775	p03
PPA14778	p03
PPA14896	p03
PPA14904	p03
PPA14953	p03
PPA15041	p03
PPA15101	p03
PPA15108	p03
PPA15212	p03
PPA15216	p03
PPA15268	p03
PPA15269	p03
PPA15283	p03
PPA15498	p03
PPA15559	p03
PPA15684	p03
PPA15769	p03
PPA15770	p03
PPA15807	p03
PPA15808	p03
PPA15823	p03
PPA15830	p03
PPA15839	p03
PPA15859	p03
PPA15905	p03
PPA15911	p03
PPA15917	p03
PPA15918	p03
PPA16136	p03
PPA16149	p03
PPA16169	p03
PPA16196	p03
PPA17137	p03
PPA17351	p03
PPA17533	p03
PPA17700	p03
PPA17950	p03
PPA18154	p03
PPA18262	p03
PPA18264	p03
PPA18265	p03
PPA18287	p03
PPA18380	p03
PPA18409	p03
PPA18721	p03
PPA18742	p03
PPA18750	p03
PPA18773	p03
PPA18816	p03
PPA18820	p03
PPA18870	p03
PPA19084	p03
PPA19144	p03
PPA19177	p03
PPA19303	p03
PPA19374	p03
PPA19390	p03
PPA19466	p03
PPA19470	p03
PPA19482	p03
PPA19484	p03
PPA19525	p03
PPA19547	p03
PPA19562	p03
PPA19602	p03
PPA19663	p03
PPA19686	p03
PPA19703	p03
PPA19714	p03
PPA19967	p03
PPA20175	p03
PPA20260	p03
PPA20355	p03
PPA20360	p03
PPA20492	p03
PPA20702	p03
PPA20703	p03
PPA20705	p03
PPA20773	p03
PPA20819	p03
PPA20893	p03
PPA20934	p03
PPA21006	p03
PPA21017	p03
PPA21078	p03
PPA21189	p03
PPA21259	p03
PPA21475	p03
PPA21553	p03
PPA21601	p03
PPA21615	p03
PPA21737	p03
PPA21872	p03
PPA21905	p03
PPA21909	p03
PPA21922	p03
PPA21974	p03
PPA21981	p03
PPA21985	p03
PPA22011	p03
PPA22026	p03
PPA22069	p03
PPA22219	p03
PPA22268	p03
PPA22294	p03
PPA22295	p03
PPA22352	p03
PPA22365	p03
PPA22393	p03
PPA22400	p03
PPA22441	p03
PPA22919	p03
PPA22973	p03
PPA22999	p03
PPA23052	p03
PPA23143	p03
PPA23149	p03
PPA23695	p03
PPA24008	p03
PPA24297	p03
PPA24335	p03
PPA24420	p03
PPA24429	p03
PPA24443	p03
PPA24451	p03
PPA24482	p03
PPA24491	p03
PPA24584	p03
PPA24642	p03
PPA24782	p03
PPA25020	p03
PPA25457	p03
PPA25582	p03
PPA25652	p03
PPA25719	p03
PPA25734	p03
PPA25773	p03
PPA25796	p03
PPA25871	p03
PPA25923	p03
PPA25953	p03
PPA25955	p03
PPA25981	p03
PPA26033	p03
PPA26084	p03
PPA26199	p03
PPA26251	p03
PPA26261	p03
PPA26381	p03
PPA26390	p03
PPA26443	p03
PPA26445	p03
PPA26460	p03
PPA26472	p03
PPA26520	p03
PPA26586	p03
PPA26639	p03
PPA26690	p03
PPA26692	p03
PPA26903	p03
PPA26925	p03
PPA26928	p03
PPA26929	p03
PPA26933	p03
PPA27032	p03
PPA27089	p03
PPA27156	p03
PPA27202	p03
PPA27713	p03
PPA27723	p03
PPA27928	p03
PPA27940	p03
PPA27947	p03
PPA27982	p03
PPA27988	p03
PPA27993	p03
PPA27994	p03
PPA28065	p03
PPA28153	p03
PPA28207	p03
PPA28277	p03
PPA28298	p03
PPA28437	p03
PPA28561	p03
PPA28862	p03
PPA29051	p03
PPA29153	p03
PPA29233	p03
PPA29408	p03
PPA29468	p03
PPA29486	p03
PPA29562	p03
PPA29619	p03
PPA29647	p03
PPA29678	p03
PPA29725	p03
PPA29837	p03
PPA29856	p03
PPA29873	p03
PPA29890	p03
PPA29921	p03
PPA29988	p03
PPA29999	p03
PPA30016	p03
PPA30131	p03
PPA30152	p03
PPA30187	p03
PPA30225	p03
PPA30229	p03
PPA30308	p03
PPA30340	p03
PPA30406	p03
PPA30566	p03
PPA30658	p03
PPA30662	p03
PPA30672	p03
PPA30712	p03
PPA30754	p03
PPA30928	p03
PPA30938	p03
PPA30946	p03
PPA31071	p03
PPA31144	p03
PPA31184	p03
PPA31232	p03
PPA31277	p03
PPA31301	p03
PPA31311	p03
PPA31484	p03
PPA31547	p03
PPA31573	p03
PPA31634	p03
PPA31680	p03
PPA31725	p03
PPA31959	p03
PPA32130	p03
PPA32133	p03
PPA32293	p03
PPA32294	p03
PPA32471	p03
PPA32551	p03
PPA32656	p03
PPA32743	p03
PPA32759	p03
PPA32923	p03
PPA32935	p03
PPA32942	p03
PPA32974	p03
PPA33068	p03
PPA33097	p03
PPA33131	p03
PPA33146	p03
PPA33154	p03
PPA33304	p03
PPA33346	p03
PPA33465	p03
PPA33481	p03
PPA33495	p03
PPA33508	p03
PPA33531	p03
PPA33539	p03
PPA33563	p03
PPA33589	p03
PPA33598	p03
PPA33607	p03
PPA33634	p03
PPA33676	p03
PPA33681	p03
PPA33683	p03
PPA33713	p03
PPA33721	p03
PPA33722	p03
PPA33735	p03
PPA33754	p03
PPA33792	p03
PPA33793	p03
PPA33839	p03
PPA33840	p03
PPA33846	p03
PPA33862	p03
PPA33893	p03
PPA33897	p03
PPA33916	p03
PPA33919	p03
PPA33954	p03
PPA33978	p03
PPA34007	p03
PPA34014	p03
PPA34039	p03
PPA34066	p03
PPA34068	p03
PPA34071	p03
PPA34088	p03
PPA34193	p03
PPA34195	p03
PPA34206	p03
PPA34210	p03
PPA34273	p03
PPA34276	p03
PPA34279	p03
PPA34290	p03
PPA34299	p03
PPA34332	p03
PPA34333	p03
PPA34334	p03
PPA34349	p03
PPA34354	p03
PPA34367	p03
PPA34369	p03
PPA34371	p03
PPA34400	p03
PPA34407	p03
PPA34418	p03
PPA34419	p03
PPA34422	p03
PPA34424	p03
PPA34426	p03
PPA34429	p03
PPA34431	p03
PPA34444	p03
PPA34470	p03
PPA34515	p03
PPA34523	p03
PPA34530	p03
PPA34534	p03
PPA34556	p03
PPA34606	p03
PPA34612	p03
PPA34618	p03
PPA34628	p03
PPA34630	p03
PPA34631	p03
PPA34641	p03
PPA34653	p03
PPA34664	p03
PPA34669	p03
PPA34696	p03
PPA34704	p03
PPA34709	p03
PPA34714	p03
PPA34724	p03
PPA34760	p03
PPA34764	p03
PPA34770	p03
PPA34779	p03
PPA34780	p03
PPA34788	p03
PPA34789	p03
PPA34802	p03
PPA34813	p03
PPA34824	p03
PPA34827	p03
PPA34829	p03
PPA34834	p03
PPA34839	p03
PPA34851	p03
PPA34866	p03
PPA34868	p03
PPA34894	p03
PPA34901	p03
PPA34904	p03
PPA34907	p03
PPA34913	p03
PPA34915	p03
PPA34927	p03
PPA34946	p03
PPA34974	p03
PPA34985	p03
PPA34989	p03
PPA35019	p03
PPA35028	p03
PPA35051	p03
PPA35066	p03
PPA35067	p03
PPA35068	p03
PPA35077	p03
PPA35079	p03
PPA35097	p03
PPA35102	p03
PPA35103	p03
PPA35106	p03
PPA35112	p03
PPA35115	p03
PPA35117	p03
PPA35132	p03
PPA35152	p03
PPA35154	p03
PPA35169	p03
PPA35184	p03
PPA35185	p03
PPA35190	p03
PPA35193	p03
PPA35194	p03
PPA35200	p03
PPA35215	p03
PPA35218	p03
PPA35221	p03
PPA35225	p03
PPA35233	p03
PPA35234	p03
PPA35235	p03
PPA35252	p03
PPA35258	p03
PPA35260	p03
PPA35262	p03
PPA35263	p03
PPA35275	p03
PPA35276	p03
PPA35279	p03
PPA35280	p03
PPA35285	p03
PPA35286	p03
PPA35287	p03
PPA35306	p03
PPA35307	p03
PPA35313	p03
PPA35324	p03
PPA35334	p03
PPA35344	p03
PPA35370	p03
PPA35371	p03
PPA35374	p03
[truncated: 26,898 more rows]
