# Supplementary material for: Single worm transcriptomics identifies a developmental core network of oscillating genes with deep conservation across nematodes
Source: HighWire-hosted journal article supplement (doi:10.1101/gr.275303.121), 2021-07-22
Supplement: Supplemental_Table_S6.xlsx [file Supplemental_Table_S6.xlsx]

## Sheet: Gene_age_class_of_Cel
Supplemental Table S6 Gene age classes of C. elegans
WBgene	Transcript ID	Age_class
WBGene00008536	F02H6.3a.2	c01
WBGene00009195	F28B1.1.1	c01
WBGene00194701	Y23H5B.12a.1	c01
WBGene00194926	K08D8.12b.1	c01
WBGene00304785	C36C9.11.1	c01
WBGene00000444	T26C11.6.1	c01
WBGene00000460	T26C11.7.2	c01
WBGene00000544	Y47H10A.1.1	c01
WBGene00000546	Y77E11A.10.1	c01
WBGene00000820	Y73B6BL.7a.2	c01
WBGene00000821	Y47H9C.6a.1	c01
WBGene00000859	C37H5.10.1	c01
WBGene00000860	C37H5.11.1	c01
WBGene00000864	F59H6.7.1	c01
WBGene00001062	R10D12.2.1	c01
WBGene00001569	F52D2.4.1	c01
WBGene00001831	F58A4.3.1	c01
WBGene00001964	C17C3.7.1	c01
WBGene00001965	C17C3.8.1	c01
WBGene00001966	C17C3.10.1	c01
WBGene00001967	F31A3.2.1	c01
WBGene00001968	F31A3.4.1	c01
WBGene00002102	T10D4.13.1	c01
WBGene00002105	M04D8.2.1	c01
WBGene00002106	M04D8.3.1	c01
WBGene00002107	ZC334.3.1	c01
WBGene00002113	ZC334.2.1	c01
WBGene00002114	T10D4.4.1	c01
WBGene00002118	K02E2.4.1	c01
WBGene00002119	Y53H1A.4b.1	c01
WBGene00003662	C17A2.8.1	c01
WBGene00003663	C27C7.4.1	c01
WBGene00003664	C27C7.3.1	c01
WBGene00003667	T15D6.6.1	c01
WBGene00003671	C47F8.8.1	c01
WBGene00003672	F41D3.1.1	c01
WBGene00003679	E03H4.13.1	c01
WBGene00003703	ZK1025.9.1	c01
WBGene00003983	Y46G5A.27.1	c01
WBGene00004010	Y48A6C.5a.1	c01
WBGene00004351	F52D2.2.1	c01
WBGene00004352	ZC53.7.1	c01
WBGene00004353	F45B8.2.1	c01
WBGene00004354	F45B8.1.1	c01
WBGene00005207	Y43B11AR.2.1	c01
WBGene00005208	Y40H7A.8.1	c01
WBGene00005210	T02B11.1.1	c01
WBGene00005753	H10D18.3.1	c01
WBGene00005754	R08F11.5.1	c01
WBGene00005755	F59D6.5a.1	c01
WBGene00005756	ZC482.8.1	c01
WBGene00005757	ZC482.6.1	c01
WBGene00005758	M01B2.11.1	c01
WBGene00005759	C41G6.2.1	c01
WBGene00005763	T10H4.5.1	c01
WBGene00005764	T10H4.6.1	c01
WBGene00005766	T10H4.8.1	c01
WBGene00005833	C25F9.7.1	c01
WBGene00006488	F56D6.6.1	c01
WBGene00006549	Y59E9AR.3.1	c01
WBGene00006550	C36C9.2.1	c01
WBGene00006551	ZK380.1.1	c01
WBGene00006558	Y73F8A.16.1	c01
WBGene00006559	Y73F8A.17.1	c01
WBGene00006630	F53B2.2.1	c01
WBGene00006631	Y45F10B.1.1	c01
WBGene00007076	AC8.4.1	c01
WBGene00007085	AH10.4.1	c01
WBGene00007173	B0393.8.1	c01
WBGene00007179	B0457.4.1	c01
WBGene00007211	BE10.3.1	c01
WBGene00007220	C01B9.1b.1	c01
WBGene00007306	C04G2.5.1	c01
WBGene00007307	C04G2.8.1	c01
WBGene00007309	C04G2.10a.2	c01
WBGene00007323	C05B5.6.1	c01
WBGene00007356	C06A1.6.1	c01
WBGene00007392	C06H5.1.1	c01
WBGene00007393	C06H5.2.1	c01
WBGene00007401	C07A9.5.1	c01
WBGene00007406	C07A9.10.1	c01
WBGene00007418	C07E3.8.1	c01
WBGene00007459	C08F11.12.2	c01
WBGene00007465	C08H9.4b.1	c01
WBGene00007467	C08H9.7.1	c01
WBGene00007469	C08H9.10.1	c01
WBGene00007470	C08H9.11.1	c01
WBGene00007471	C08H9.12.1	c01
WBGene00007472	C08H9.13.1	c01
WBGene00007473	C08H9.14.1	c01
WBGene00007523	C11G6.2.1	c01
WBGene00007569	C14A6.5.1	c01
WBGene00007570	C14A6.6.1	c01
WBGene00007571	C14A6.7.1	c01
WBGene00007638	C17D12.3.1	c01
WBGene00007656	C17H1.3.1	c01
WBGene00007658	C17H1.5.1	c01
WBGene00007661	C17H1.8b.1	c01
WBGene00007662	C17H1.9.1	c01
WBGene00007672	C18D4.2a.1	c01
WBGene00007673	C18D4.3.1	c01
WBGene00007675	C18D4.6c.1	c01
WBGene00007678	C18D4.9.1	c01
WBGene00007682	C18D11.6.1	c01
WBGene00007724	C25F9.4.1	c01
WBGene00007725	C25F9.5.1	c01
WBGene00007726	C25F9.6.1	c01
WBGene00007727	C25F9.8.1	c01
WBGene00007728	C25F9.9.1	c01
WBGene00007766	C27C7.1.2	c01
WBGene00007768	C27C7.5a.1	c01
WBGene00007769	C27C7.7.1	c01
WBGene00007770	C27C7.8.1	c01
WBGene00007773	C27C12.3.1	c01
WBGene00007850	C31G12.1.2	c01
WBGene00007901	C33D9.8.1	c01
WBGene00007960	C35D6.3.1	c01
WBGene00007989	C37A5.2.1	c01
WBGene00007990	C37A5.4.1	c01
WBGene00007992	C37A5.8.1	c01
WBGene00008012	C38D9.4.1	c01
WBGene00008056	C41G6.5.1	c01
WBGene00008066	C43D7.2.1	c01
WBGene00008067	C43D7.4.1	c01
WBGene00008068	C43D7.5.1	c01
WBGene00008069	C43D7.7.1	c01
WBGene00008070	C43D7.8.1	c01
WBGene00008071	C43D7.9.1	c01
WBGene00008085	C44C10.4.1	c01
WBGene00008086	C44C10.5.1	c01
WBGene00008088	C44C10.7.1	c01
WBGene00008111	C46C2.3.1	c01
WBGene00008130	C47B2.1.2	c01
WBGene00008138	C47D12.4.1	c01
WBGene00008145	C47E8.8a.1	c01
WBGene00008157	C47F8.1.1	c01
WBGene00008158	C47F8.2.1	c01
WBGene00008163	C47F8.7.1	c01
WBGene00008185	C49A1.2a.1	c01
WBGene00008186	C49A1.3.1	c01
WBGene00008196	C49C3.6.1	c01
WBGene00008197	C49C3.7.1	c01
WBGene00008210	C49F5.6.1	c01
WBGene00008243	C50H2.7.1	c01
WBGene00008289	C54C8.1.1	c01
WBGene00008295	C54C8.9.1	c01
WBGene00008301	C54D10.7.1	c01
WBGene00008393	D1086.6.3	c01
WBGene00008394	D1086.7.1	c01
WBGene00008464	E02H4.6.1	c01
WBGene00008474	E03H4.6.1	c01
WBGene00008535	F02H6.2.2	c01
WBGene00008569	F08A8.7.2	c01
WBGene00008575	F08E10.7.1	c01
WBGene00008620	F09C6.10.1	c01
WBGene00008631	F10A3.1.1	c01
WBGene00008636	F10A3.11.1	c01
WBGene00008650	F10D11.4.2	c01
WBGene00008671	F11A5.3.1	c01
WBGene00008672	F11A5.4.1	c01
WBGene00008716	F11F1.4.1	c01
WBGene00008717	F11F1.5.1	c01
WBGene00008778	F14A5.1.1	c01
WBGene00008782	F14B6.1.1	c01
WBGene00008784	F14B6.3.1	c01
WBGene00008815	F14F8.4.1	c01
WBGene00008818	F14F8.12.1	c01
WBGene00008821	F14H3.2.1	c01
WBGene00008822	F14H3.3.2	c01
WBGene00008823	F14H3.4.1	c01
WBGene00008824	F14H3.5.1	c01
WBGene00008834	F14H8.4.1	c01
WBGene00008835	F14H8.5.1	c01
WBGene00008838	F15A4.2.1	c01
WBGene00008858	F15D3.8.1	c01
WBGene00008883	F16B12.7.1	c01
WBGene00008894	F16H6.4b.1	c01
WBGene00008897	F16H6.7.1	c01
WBGene00008898	F16H6.8.1	c01
WBGene00008899	F16H6.9.1	c01
WBGene00008900	F16H6.10.2	c01
WBGene00008905	F17B5.1a.1	c01
WBGene00008944	F19B2.5.5	c01
WBGene00008945	F19B2.6.2	c01
WBGene00008946	F19B2.7.1	c01
WBGene00008949	F19B6.3.1	c01
WBGene00008984	F20E11.7.1	c01
WBGene00009017	F21D9.3.1	c01
WBGene00009021	F21D9.8.1	c01
WBGene00009061	F22G12.1.1	c01
WBGene00009063	F22G12.3.1	c01
WBGene00009068	F23A7.3.1	c01
WBGene00009069	F23A7.4.2	c01
WBGene00009154	F26D2.16.1	c01
WBGene00009166	F26F2.1.1	c01
WBGene00009167	F26F2.2.1	c01
WBGene00009168	F26F2.3.1	c01
WBGene00009169	F26F2.4b.1	c01
WBGene00009170	F26F2.5.1	c01
WBGene00009196	F28B1.2.1	c01
WBGene00009234	F28H6.6.1	c01
WBGene00009235	F28H6.7.1	c01
WBGene00009251	F29D10.2.1	c01
WBGene00009252	F29D10.3.1	c01
WBGene00009280	F31B9.3.1	c01
WBGene00009299	F31E9.6.1	c01
WBGene00009300	F31F6.1.1	c01
WBGene00009301	F31F6.2.1	c01
WBGene00009302	F31F6.3.1	c01
WBGene00009360	F33E2.4.1	c01
WBGene00009378	F34H10.1.1	c01
WBGene00009410	F35E2.2.1	c01
WBGene00009415	F35E2.8.1	c01
WBGene00009416	F35E2.9.1	c01
WBGene00009463	F36D1.4.1	c01
WBGene00009465	F36D1.6.1	c01
WBGene00009524	F38A1.11.1	c01
WBGene00009538	F38C2.6.1	c01
WBGene00009567	F40D4.6.1	c01
WBGene00009568	F40D4.7.1	c01
WBGene00009571	F40D4.12.1	c01
WBGene00009572	F40D4.13.1	c01
WBGene00009592	F40F12.3.1	c01
WBGene00009608	F41D3.3.1	c01
WBGene00009710	F44G3.10.1	c01
WBGene00009746	F46A8.3.1	c01
WBGene00009747	F46A8.4.1	c01
WBGene00009748	F46A8.5.1	c01
WBGene00009751	F46A8.8.1	c01
WBGene00009754	F46A9.1.1	c01
WBGene00009755	F46A9.2.1	c01
WBGene00009758	F46B3.3a.1	c01
WBGene00009835	F47H4.2b.1	c01
WBGene00009841	F47H4.11.1	c01
WBGene00009863	F49B2.3.1	c01
WBGene00009907	F49H6.3.1	c01
WBGene00009909	F49H6.8.1	c01
WBGene00009912	F49H6.11.1	c01
WBGene00009913	F49H6.12.1	c01
WBGene00009914	F49H6.13.1	c01
WBGene00009951	F53A2.3.1	c01
WBGene00009960	F53B6.5.1	c01
WBGene00010030	F54B11.7.1	c01
WBGene00010036	F54C8.2.1	c01
WBGene00010084	F55B11.2.1	c01
WBGene00010085	F55B11.3.2	c01
WBGene00010087	F55B11.5.1	c01
WBGene00010100	F55C9.3.1	c01
WBGene00010101	F55C9.4.1	c01
WBGene00010104	F55C9.7.1	c01
WBGene00010105	F55C9.8.1	c01
WBGene00010106	F55C9.10.1	c01
WBGene00010107	F55C9.11.1	c01
WBGene00010149	F56D5.5.1	c01
WBGene00010203	F57E7.2.1	c01
WBGene00010206	F57G4.1.1	c01
WBGene00010219	F57G9.3.1	c01
WBGene00010410	H22D14.1.1	c01
WBGene00010412	H25K10.2.1	c01
WBGene00010417	H25P06.4.1	c01
WBGene00010451	K01A11.3.1	c01
WBGene00010483	K01G12.3.1	c01
WBGene00010492	K02B9.1.1	c01
WBGene00010493	K02B9.2.1	c01
WBGene00010531	K03D3.5.1	c01
WBGene00010555	K04C1.5.1	c01
WBGene00010588	K05D4.3.1	c01
WBGene00010590	K05D4.8.1	c01
WBGene00010653	K08C9.6.1	c01
WBGene00010654	K08C9.7.1	c01
WBGene00010655	K08D8.1.1	c01
WBGene00010672	K08E7.4.1	c01
WBGene00010688	K08G2.7.1	c01
WBGene00010692	K08H2.5.1	c01
WBGene00010752	K10G4.3.1	c01
WBGene00010754	K10G4.5.1	c01
WBGene00010850	M04C3.1d.1	c01
WBGene00010851	M04C3.2b.3	c01
WBGene00010951	M199.2.1	c01
WBGene00010954	M199.6.1	c01
WBGene00010955	M199.7.1	c01
WBGene00010980	R02D5.7.1	c01
WBGene00011027	R05D7.2.1	c01
WBGene00011049	R06A4.6.1	c01
WBGene00011131	R07H5.11a.1	c01
WBGene00011152	R09A8.1a.1	c01
WBGene00011153	R09A8.2.1	c01
WBGene00011207	R10E8.1a.3	c01
WBGene00011208	R10E8.2.1	c01
WBGene00011209	R10E8.3.2	c01
WBGene00011212	R10E8.6.1	c01
WBGene00011213	R10E8.8.3	c01
WBGene00011264	R13H4.6c.1	c01
WBGene00011363	T02B5.2.1	c01
WBGene00011389	T02G6.6.1	c01
WBGene00011475	T05D4.2.1	c01
WBGene00011491	T05F1.5.1	c01
WBGene00011495	T05F1.11.1	c01
WBGene00011539	T06E6.5.1	c01
WBGene00011591	T07F10.5.1	c01
WBGene00011610	T08D2.5.2	c01
WBGene00011620	T08G3.11.1	c01
WBGene00011621	T08G3.13.1	c01
WBGene00011626	T08G5.7.1	c01
WBGene00011651	T09E11.2.1	c01
WBGene00011712	T11F9.10.1	c01
WBGene00011715	T11F9.14.1	c01
WBGene00011790	T15H9.5.1	c01
WBGene00011804	T16G12.3.1	c01
WBGene00011841	T19C9.5.1	c01
WBGene00011942	T23D5.3.1	c01
WBGene00011958	T23G4.2.1	c01
WBGene00011989	T24D5.1.1	c01
WBGene00011991	T24D5.3.1	c01
WBGene00012003	T24H10.5.1	c01
WBGene00012026	T25E12.11.1	c01
WBGene00012028	T25E12.13.1	c01
WBGene00012038	T26E3.5.1	c01
WBGene00012041	T26E3.8.1	c01
WBGene00012051	T26E4.9.1	c01
WBGene00012052	T26E4.10.1	c01
WBGene00012063	T26H2.1.1	c01
WBGene00012065	T26H2.3.1	c01
WBGene00012075	T27A8.3.1	c01
WBGene00012081	T27C5.8.1	c01
WBGene00012109	T28A8.3.2	c01
WBGene00012110	T28A8.4.2	c01
WBGene00012111	T28A8.5.1	c01
WBGene00012112	T28A8.6.2	c01
WBGene00012119	T28C6.3.1	c01
WBGene00012146	VB0393L.2.1	c01
WBGene00012151	VH15N14R.1.1	c01
WBGene00012159	VY10G11R.1.1	c01
WBGene00012228	W03H9.2b.1	c01
WBGene00012233	W04A4.4.1	c01
WBGene00012238	W04A8.3.1	c01
WBGene00012239	W04A8.4a.1	c01
WBGene00012240	W04A8.5.1	c01
WBGene00012247	W04E12.2.1	c01
WBGene00012249	W04E12.4.1	c01
WBGene00012250	W04E12.5a.1	c01
WBGene00012252	W04E12.7.2	c01
WBGene00012264	W04G5.3.1	c01
WBGene00012265	W04G5.4.1	c01
WBGene00012266	W04G5.5.1	c01
WBGene00012269	W04G5.9.1	c01
WBGene00012303	W06D11.5.1	c01
WBGene00012311	W06G6.9.1	c01
WBGene00012313	W06G6.11.1	c01
WBGene00012314	W06G6.12.1	c01
WBGene00012404	Y6G8.2a.1	c01
WBGene00012406	Y6G8.4.1	c01
WBGene00012486	Y18D10A.21.1	c01
WBGene00012491	Y20C6A.1b.1	c01
WBGene00012492	Y20C6A.2.1	c01
WBGene00012503	Y26D4A.5a.1	c01
WBGene00012504	Y26D4A.6.1	c01
WBGene00012525	Y32B12C.1.1	c01
WBGene00012570	Y37H2A.10a.1	c01
WBGene00012571	Y37H2A.11.1	c01
WBGene00012581	Y38E10A.3.1	c01
WBGene00012596	Y38E10A.18.1	c01
WBGene00012622	Y38H6C.9a.1	c01
WBGene00012624	Y38H6C.11.1	c01
WBGene00012818	Y43F8B.7.1	c01
WBGene00012819	Y43F8B.9.1	c01
WBGene00012822	Y43F8B.12.1	c01
WBGene00012823	Y43F8B.13.1	c01
WBGene00012824	Y43F8B.14.1	c01
WBGene00012827	Y43F8C.5.1	c01
WBGene00012836	Y43F8C.15.1	c01
WBGene00012837	Y43F8C.16.1	c01
WBGene00012848	Y44A6B.3.1	c01
WBGene00012852	Y44A6D.1.1	c01
WBGene00012877	Y45F10C.1.1	c01
WBGene00012878	Y45F10C.2.1	c01
WBGene00012899	Y46G5A.7.1	c01
WBGene00012900	Y46G5A.8.1	c01
WBGene00012916	Y46G5A.28.1	c01
WBGene00012922	Y47D3A.1.1	c01
WBGene00012945	Y47H9A.1.1	c01
WBGene00012946	Y47H9B.2.1	c01
WBGene00012981	Y48B6A.10.1	c01
WBGene00013036	Y49E10.17a.1	c01
WBGene00013060	Y51A2A.4a.1	c01
WBGene00013061	Y51A2A.5.1	c01
WBGene00013063	Y51A2A.7.1	c01
WBGene00013064	Y51A2A.11.1	c01
WBGene00013102	Y51H4A.6.1	c01
WBGene00013105	Y51H4A.10.1	c01
WBGene00013120	Y51H4A.26.1	c01
WBGene00013148	Y53F4A.2.1	c01
WBGene00013154	Y53F4B.7.1	c01
WBGene00013172	Y53F4B.26.1	c01
WBGene00013179	Y53H1A.3.1	c01
WBGene00013182	Y53H1B.4.1	c01
WBGene00013184	Y53H1B.6.1	c01
WBGene00013221	Y54G11A.14a.1	c01
WBGene00013230	Y56A3A.10.1	c01
WBGene00013233	Y56A3A.14.1	c01
WBGene00013234	Y56A3A.15.1	c01
WBGene00013247	Y57A10A.2.1	c01
WBGene00013249	Y57A10A.4.1	c01
WBGene00013250	Y57A10A.5.2	c01
WBGene00013253	Y57A10A.8.2	c01
WBGene00013278	Y57A10B.6.1	c01
WBGene00013280	Y57A10C.1.1	c01
WBGene00013329	Y57G11C.40.1	c01
WBGene00013330	Y57G11C.41.1	c01
WBGene00013351	Y59A8B.19.1	c01
WBGene00013421	Y66A7A.1.1	c01
WBGene00013427	Y66D12A.1.1	c01
WBGene00013468	Y68A4A.6.1	c01
WBGene00013469	Y68A4A.10a.1	c01
WBGene00013472	Y68A4B.3.1	c01
WBGene00013505	Y71A12B.8.1	c01
WBGene00013508	Y71A12B.11.1	c01
WBGene00013521	Y73F8A.12.1	c01
WBGene00013523	Y73F8A.14.1	c01
WBGene00013524	Y73F8A.15.1	c01
WBGene00013562	Y75B8A.32.1	c01
WBGene00013581	Y79H2A.4.1	c01
WBGene00013629	Y102A5C.33.1	c01
WBGene00013635	Y105C5A.10.1	c01
WBGene00013656	Y105C5B.17.1	c01
WBGene00013657	Y105C5B.18.1	c01
WBGene00013658	Y105C5B.19.2	c01
WBGene00013741	Y111B2A.21.1	c01
WBGene00013750	Y113G7A.13.1	c01
WBGene00013759	Y113G7B.8.1	c01
WBGene00013773	Y116A8A.2.1	c01
WBGene00013774	Y116A8A.3.1	c01
WBGene00013775	Y116A8A.4.1	c01
WBGene00013776	Y116A8A.6.1	c01
WBGene00013777	Y116A8A.7.1	c01
WBGene00013779	Y116A8B.1.2	c01
WBGene00013791	Y116A8C.11.1	c01
WBGene00013795	Y116A8C.18.1	c01
WBGene00013798	Y116A8C.21.1	c01
WBGene00013816	Y116F11A.1.1	c01
WBGene00013822	Y116F11B.6.1	c01
WBGene00013832	ZC15.3.1	c01
WBGene00013938	ZK218.4.1	c01
WBGene00013953	ZK262.8.1	c01
WBGene00014041	ZK666.1.1	c01
WBGene00014042	ZK666.2.1	c01
WBGene00014044	ZK666.4.1	c01
WBGene00014061	ZK673.5.1	c01
WBGene00014064	ZK673.10.1	c01
WBGene00014102	ZK849.4.1	c01
WBGene00014103	ZK849.5.1	c01
WBGene00014156	ZK930.6.1	c01
WBGene00014162	ZK938.6.1	c01
WBGene00014186	ZK1025.6.1	c01
WBGene00014189	ZK1025.10.4	c01
WBGene00014195	ZK1037.11.1	c01
WBGene00014698	C37A5.3.1	c01
WBGene00014699	C37A5.5.1	c01
WBGene00014700	C37A5.6.1	c01
WBGene00014871	Y37H9A.5.1	c01
WBGene00015017	B0205.1a.2	c01
WBGene00015023	B0205.9.2	c01
WBGene00015037	B0212.3.2	c01
WBGene00015117	B0294.1.1	c01
WBGene00015199	B0454.8.1	c01
WBGene00015242	B0524.3.1	c01
WBGene00015243	B0524.4.1	c01
WBGene00015255	B0554.2.1	c01
WBGene00015257	B0554.4.1	c01
WBGene00015366	C03A7.2.1	c01
WBGene00015385	C03B8.2.1	c01
WBGene00015409	C03H5.7a.1	c01
WBGene00015414	C04C3.4.1	c01
WBGene00015433	C04E12.2.1	c01
WBGene00015434	C04E12.4.1	c01
WBGene00015435	C04E12.5a.1	c01
WBGene00015534	C06E4.5.1	c01
WBGene00015573	C07G1.7.1	c01
WBGene00015576	C07G3.8b.1	c01
WBGene00015608	C08F1.4a.3	c01
WBGene00015609	C08F1.5.1	c01
WBGene00015610	C08F1.6.1	c01
WBGene00015611	C08F1.8.1	c01
WBGene00015613	C08F1.10.1	c01
WBGene00015615	C08G5.2.1	c01
WBGene00015628	C09B9.3.1	c01
WBGene00015655	C09G12.5.1	c01
WBGene00015689	C10G11.9.1	c01
WBGene00015706	C12D5.3.1	c01
WBGene00015707	C12D5.4.1	c01
WBGene00015708	C12D5.5.1	c01
WBGene00015758	C14C6.4.1	c01
WBGene00015797	C15F1.8.1	c01
WBGene00015819	C16A11.6.1	c01
WBGene00015825	C16C4.1.1	c01
WBGene00015827	C16C4.3.1	c01
WBGene00015828	C16C4.4b.1	c01
WBGene00015829	C16C4.5.1	c01
WBGene00015832	C16C4.8.1	c01
WBGene00015834	C16C4.10.1	c01
WBGene00015835	C16C4.11.1	c01
WBGene00015836	C16C4.12.1	c01
WBGene00015837	C16C4.13.1	c01
WBGene00015838	C16C4.14.1	c01
WBGene00015839	C16C4.15.1	c01
WBGene00015842	C16C8.4.1	c01
WBGene00015843	C16C8.5.1	c01
WBGene00015846	C16C8.8.1	c01
WBGene00015847	C16C8.9.1	c01
WBGene00015848	C16C8.10.1	c01
WBGene00015849	C16C8.11.1	c01
WBGene00015850	C16C8.12.1	c01
WBGene00015851	C16C8.13.2	c01
WBGene00015852	C16C8.14.2	c01
WBGene00015853	C16C8.16.1	c01
WBGene00015854	C16C8.17.1	c01
WBGene00015869	C17A2.1.1	c01
WBGene00015878	C17B7.4.1	c01
WBGene00015879	C17B7.5.1	c01
WBGene00015886	C17B7.12.1	c01
WBGene00015888	C17C3.2.1	c01
WBGene00015895	C17C3.13.1	c01
WBGene00015912	C17F4.5.1	c01
WBGene00016083	C25A8.2.1	c01
WBGene00016137	C26E6.1.1	c01
WBGene00016216	C29F9.1.1	c01
WBGene00016218	C29F9.3a.1	c01
WBGene00016219	C29F9.4.1	c01
WBGene00016222	C29F9.8.1	c01
WBGene00016223	C29F9.9.1	c01
WBGene00016281	C31B8.4.1	c01
WBGene00016295	C32B5.1a.1	c01
WBGene00016300	C32B5.7a.1	c01
WBGene00016306	C32B5.13.1	c01
WBGene00016308	C32B5.15a.1	c01
WBGene00016322	C32E8.4.3	c01
WBGene00016336	C33C12.4.1	c01
WBGene00016337	C33C12.5.1	c01
WBGene00016414	C34F11.2.1	c01
WBGene00016433	C35B1.3.1	c01
WBGene00016456	C35E7.4.2	c01
WBGene00016457	C35E7.5a.2	c01
WBGene00016473	C36C5.4b.1	c01
WBGene00016485	C36C9.1.1	c01
WBGene00016520	C39B5.2b.1	c01
WBGene00016544	C40A11.1.1	c01
WBGene00016548	C40A11.5.1	c01
WBGene00016551	C40A11.8.2	c01
WBGene00016554	C40D2.1.1	c01
WBGene00016555	C40D2.2.2	c01
WBGene00016556	C40D2.3.1	c01
WBGene00016685	C45H4.1.1	c01
WBGene00016687	C45H4.3a.1	c01
WBGene00016689	C45H4.7.1	c01
WBGene00016690	C45H4.8.1	c01
WBGene00016691	C45H4.9.1	c01
WBGene00016692	C45H4.10.1	c01
WBGene00016695	C45H4.14a.1	c01
WBGene00016710	C46E10.4.2	c01
WBGene00016711	C46E10.5.1	c01
WBGene00016717	C46F9.1a.1	c01
WBGene00016718	C46F9.2.1	c01
WBGene00016719	C46F9.3.1	c01
WBGene00016720	C46F9.4.1	c01
WBGene00016752	C48E7.7.1	c01
WBGene00016758	C49A9.4.2	c01
WBGene00016759	C49A9.5.2	c01
WBGene00016760	C49A9.6.1	c01
WBGene00016763	C49A9.9a.3	c01
WBGene00016777	C49D10.9.1	c01
WBGene00016821	C50E3.10.1	c01
WBGene00016881	C52E2.2.1	c01
WBGene00016882	C52E2.3.1	c01
WBGene00016883	C52E2.4.2	c01
WBGene00016884	C52E2.5.1	c01
WBGene00016895	C53B7.6.1	c01
WBGene00016901	C53C11.4.1	c01
WBGene00016949	C55C2.3.1	c01
WBGene00016993	CD4.8.1	c01
WBGene00017058	D2062.6.1	c01
WBGene00017059	D2062.7.1	c01
WBGene00017072	D2096.5.1	c01
WBGene00017077	D2096.10.2	c01
WBGene00017100	E02H9.2.1	c01
WBGene00017101	E02H9.3a.2	c01
WBGene00017104	E02H9.6.1	c01
WBGene00017153	E_BE45912.2.4	c01
WBGene00017177	F02E8.4.1	c01
WBGene00017186	F07B7.2.1	c01
WBGene00017189	F07B7.8.1	c01
WBGene00017192	F07B7.14.1	c01
WBGene00017208	F07E5.2.1	c01
WBGene00017212	F07E5.7.1	c01
WBGene00017246	F08D12.2.1	c01
WBGene00017247	F08D12.3.1	c01
WBGene00017259	F08F1.9.1	c01
WBGene00017264	F08F3.8.1	c01
WBGene00017343	F10E7.1.1	c01
WBGene00017395	F12A10.6.1	c01
WBGene00017450	F14D2.1.1	c01
WBGene00017459	F14D2.11.2	c01
WBGene00017470	F14H12.2.1	c01
WBGene00017488	F15E6.8.1	c01
WBGene00017508	F16B4.6a.1	c01
WBGene00017516	F16G10.1.1	c01
WBGene00017517	F16G10.2.1	c01
WBGene00017518	F16G10.3.1	c01
WBGene00017519	F16G10.4.1	c01
WBGene00017521	F16G10.6.1	c01
WBGene00017522	F16G10.7.1	c01
WBGene00017523	F16G10.8.1	c01
WBGene00017524	F16G10.9.1	c01
WBGene00017525	F16G10.10.1	c01
WBGene00017526	F16G10.11.1	c01
WBGene00017527	F16G10.13.1	c01
WBGene00017528	F16G10.14.1	c01
WBGene00017539	F17E9.2.1	c01
WBGene00017540	F17E9.3.1	c01
WBGene00017541	F17E9.4.1	c01
WBGene00017556	F18A12.7.2	c01
WBGene00017611	F19G12.3.1	c01
WBGene00017704	F22E5.2.1	c01
WBGene00017706	F22E5.7.1	c01
WBGene00017709	F22E5.11.1	c01
WBGene00017710	F22E5.12.1	c01
WBGene00017711	F22E5.13.1	c01
WBGene00017712	F22E5.17.1	c01
WBGene00017713	F22E5.20.1	c01
WBGene00017714	F22F1.2.1	c01
WBGene00017875	F28A10.7.1	c01
WBGene00017930	F29G9.1.1	c01
WBGene00017952	F31E3.6.2	c01
WBGene00018021	F34D6.1.1	c01
WBGene00018052	F35F10.1.1	c01
WBGene00018055	F35F10.5.1	c01
WBGene00018056	F35F10.6.2	c01
WBGene00018057	F35F10.7.1	c01
WBGene00018100	F36H5.1.1	c01
WBGene00018102	F36H5.3b.1	c01
WBGene00018103	F36H5.4.1	c01
WBGene00018108	F36H5.10.1	c01
WBGene00018120	F36H12.4.2	c01
WBGene00018162	F38A5.5.1	c01
WBGene00018166	F38A5.9.1	c01
WBGene00018167	F38A5.10.1	c01
WBGene00018169	F38A5.12.1	c01
WBGene00018170	F38A5.14.1	c01
WBGene00018202	F39F10.2.1	c01
WBGene00018203	F39F10.3.1	c01
WBGene00018229	F40C5.2.1	c01
WBGene00018244	F40G9.8.1	c01
WBGene00018245	F40G9.9.1	c01
WBGene00018296	F41F3.1.1	c01
WBGene00018351	F42G2.2c.2	c01
WBGene00018353	F42G2.4.2	c01
WBGene00018378	F43C11.1b.1	c01
WBGene00018379	F43C11.2.1	c01
WBGene00018381	F43C11.4.1	c01
WBGene00018388	F43C11.11.1	c01
WBGene00018389	F43C11.12.1	c01
WBGene00018428	F44E7.6.1	c01
WBGene00018445	F45C12.14.1	c01
WBGene00018456	F45D11.10a.1	c01
WBGene00018457	F45D11.12.1	c01
WBGene00018458	F45D11.13.1	c01
WBGene00018459	F45D11.14.1	c01
WBGene00018460	F45D11.15.1	c01
WBGene00018461	F45D11.16.1	c01
WBGene00018493	F46F5.1b.1	c01
WBGene00018496	F46F5.5.1	c01
WBGene00018497	F46F5.6.1	c01
WBGene00018500	F46F5.9.1	c01
WBGene00018504	F46F5.13.1	c01
WBGene00018534	F47B7.3.1	c01
WBGene00018535	F47B7.4.1	c01
WBGene00018536	F47B7.5.1	c01
WBGene00018649	F49F1.9.1	c01
WBGene00018650	F49F1.10.1	c01
WBGene00018651	F49F1.11.1	c01
WBGene00018659	F52C6.2.1	c01
WBGene00018660	F52C6.3.1	c01
WBGene00018661	F52C6.4.1	c01
WBGene00018761	F53E10.5.1	c01
WBGene00018767	F53G2.2.1	c01
WBGene00018768	F53G2.3.1	c01
WBGene00018933	F56B3.9.1	c01
WBGene00018938	F56C3.1.1	c01
WBGene00019034	F58E1.2a.1	c01
WBGene00019035	F58E1.3.1	c01
WBGene00019037	F58E1.5.1	c01
WBGene00019039	F58E1.8.1	c01
WBGene00019040	F58E1.9.1	c01
WBGene00019047	F58E2.3.2	c01
WBGene00019048	F58E2.4.1	c01
WBGene00019063	F58F12.3.1	c01
WBGene00019065	F58G4.3.1	c01
WBGene00019104	F59D6.2.1	c01
WBGene00019105	F59D6.3.1	c01
WBGene00019122	F59E12.6a.1	c01
WBGene00019150	H04J21.1.1	c01
WBGene00019186	H11E01.1.1	c01
WBGene00019189	H11L12.1.1	c01
WBGene00019190	H12I13.1.1	c01
WBGene00019248	H27M09.5.2	c01
WBGene00019260	H34I24.1.1	c01
WBGene00019312	K02E7.7.1	c01
WBGene00019314	K02E7.10.1	c01
WBGene00019339	K02F6.5.1	c01
WBGene00019342	K02F6.8.1	c01
WBGene00019350	K02H11.9.1	c01
WBGene00019372	K03H9.3.1	c01
WBGene00019442	K06C4.1.1	c01
WBGene00019495	K07E8.3.3	c01
WBGene00019502	K07G6.1.1	c01
WBGene00019574	K09E3.2.1	c01
WBGene00019586	K09F6.3.1	c01
WBGene00019594	K09H9.1.1	c01
WBGene00019687	K12H6.7.1	c01
WBGene00019709	M01E10.3.1	c01
WBGene00019723	M02B7.1.2	c01
WBGene00019777	M57.1.3	c01
WBGene00019794	M151.2.1	c01
WBGene00019797	M151.5.1	c01
WBGene00019799	M151.7.1	c01
WBGene00019804	R01B10.2.1	c01
WBGene00019858	R03H10.6.1	c01
WBGene00019859	R03H10.7.1	c01
WBGene00019874	R05C11.2.1	c01
WBGene00019887	R05D8.11.1	c01
WBGene00019913	R06B10.2.1	c01
WBGene00020027	R12C12.7.2	c01
WBGene00020076	R52.4.1	c01
WBGene00020077	R52.5.1	c01
WBGene00020078	R52.6.1	c01
WBGene00020080	R52.9.1	c01
WBGene00020084	R105.1.1	c01
WBGene00020116	R155.2.1	c01
WBGene00020117	R155.3.1	c01
WBGene00020118	R155.4.1	c01
WBGene00020173	T02H6.3a.1	c01
WBGene00020174	T02H6.4.1	c01
WBGene00020176	T02H6.6.1	c01
WBGene00020177	T02H6.7.1	c01
WBGene00020178	T02H6.8.1	c01
WBGene00020180	T02H6.10.1	c01
WBGene00020203	T04B8.1.1	c01
WBGene00020232	T05A8.6.1	c01
WBGene00020265	T05H4.2.1	c01
WBGene00020285	T06A10.2.2	c01
WBGene00020290	T06D4.1b.5	c01
WBGene00020305	T07D3.2.1	c01
WBGene00020342	T08B1.5.1	c01
WBGene00020345	T08B2.4.1	c01
WBGene00020350	T08B2.12.1	c01
WBGene00020357	T08E11.1.1	c01
WBGene00020358	T08E11.2.1	c01
WBGene00020359	T08E11.3.1	c01
WBGene00020360	T08E11.4.1	c01
WBGene00020408	T10D4.6.1	c01
WBGene00020467	T12F5.2.1	c01
WBGene00020472	T13B5.5.1	c01
WBGene00020473	T13B5.6.1	c01
WBGene00020474	T13B5.7.1	c01
WBGene00020515	T14G12.6.1	c01
WBGene00020532	T16A1.1.1	c01
WBGene00020534	T16A1.3.1	c01
WBGene00020535	T16A1.4.1	c01
WBGene00020537	T16A1.8.1	c01
WBGene00020540	T17A3.2.1	c01
WBGene00020546	T17A3.10.1	c01
WBGene00020609	T20D4.3b.1	c01
WBGene00020611	T20D4.5.1	c01
WBGene00020617	T20D4.11.1	c01
WBGene00020642	T20H9.6.1	c01
WBGene00020744	T24A6.1a.1	c01
WBGene00020754	T24A6.17.1	c01
WBGene00020771	T24E12.1.2	c01
WBGene00020793	T25D1.1.1	c01
WBGene00020817	T25G12.11.1	c01
WBGene00020826	T26A8.3.1	c01
WBGene00020840	T27A3.4.1	c01
WBGene00020878	T28A11.16.2	c01
WBGene00020881	T28A11.19.1	c01
WBGene00020890	T28C12.3.1	c01
WBGene00020942	W02D7.6.1	c01
WBGene00021023	W04B5.6.1	c01
WBGene00021040	W05G11.2.1	c01
WBGene00021076	W07E6.5a.1	c01
WBGene00021084	W08E12.3.1	c01
WBGene00021085	W08E12.4.1	c01
WBGene00021086	W08E12.5.1	c01
WBGene00021092	W08F4.2.1	c01
WBGene00021098	W08F4.9.1	c01
WBGene00021101	W08F4.12a.1	c01
WBGene00021107	W09B7.2.1	c01
WBGene00021108	W09B7.3.1	c01
WBGene00021122	W09G12.8.1	c01
WBGene00021165	Y5H2B.3.1	c01
WBGene00021166	Y5H2B.4.1	c01
WBGene00021188	Y13C8A.1.1	c01
WBGene00021190	Y14H12A.1.1	c01
WBGene00021193	Y16E11A.1.1	c01
WBGene00021256	Y22D7AR.2.1	c01
WBGene00021266	Y22D7AR.14.1	c01
WBGene00021299	Y27F2A.8.2	c01
WBGene00021300	Y27F2A.9.1	c01
WBGene00021302	Y32G9A.3a.1	c01
WBGene00021336	Y34F4.1b.1	c01
WBGene00021337	Y34F4.2b.1	c01
WBGene00021339	Y34F4.4.2	c01
WBGene00021340	Y34F4.5a.1	c01
WBGene00021405	Y38C1AB.3.1	c01
WBGene00021409	Y38C1AB.7.1	c01
WBGene00021433	Y39A3A.2.1	c01
WBGene00021500	Y40C7B.4.1	c01
WBGene00021605	Y46H3C.5.1	c01
WBGene00021607	Y46H3C.7.1	c01
WBGene00021743	Y50D4B.4a.1	c01
WBGene00021772	Y51H7BM.1.1	c01
WBGene00021806	Y53G8AM.6.1	c01
WBGene00021809	Y53G8AR.1.1	c01
WBGene00021821	Y54B9A.1.1	c01
WBGene00021878	Y54G2A.13.1	c01
WBGene00021880	Y54G2A.15.1	c01
WBGene00021887	Y54G2A.22.1	c01
WBGene00021907	Y55B1AR.3.1	c01
WBGene00021908	Y55B1AR.4.1	c01
WBGene00021961	Y57E12B.1.1	c01
WBGene00021988	Y59E1A.2.1	c01
WBGene00022000	Y59E9AR.5.1	c01
WBGene00022011	Y59H11AR.3.1	c01
WBGene00022061	Y67D8B.1a.1	c01
WBGene00022066	Y67D8C.2.1	c01
WBGene00022070	Y67D8C.6.1	c01
WBGene00022083	Y69A2AR.12.1	c01
WBGene00022096	Y69A2AR.25.1	c01
WBGene00022189	Y71H2AR.2.1	c01
WBGene00022216	Y73B3A.14.1	c01
WBGene00022223	Y73B3B.1.1	c01
WBGene00022224	Y73B3B.2.1	c01
WBGene00022225	Y73B3B.3.1	c01
WBGene00022228	Y73B6A.1a.1	c01
WBGene00022275	Y74C9A.1.1	c01
WBGene00022291	Y75D11A.2.1	c01
WBGene00022292	Y75D11A.3.1	c01
WBGene00022319	Y82E9BL.2.1	c01
WBGene00022320	Y82E9BL.3.1	c01
WBGene00022322	Y82E9BL.5.1	c01
WBGene00022323	Y82E9BL.6.1	c01
WBGene00022334	Y82E9BR.1.1	c01
WBGene00022337	Y82E9BR.4.1	c01
WBGene00022340	Y82E9BR.7.1	c01
WBGene00022341	Y82E9BR.8.1	c01
WBGene00022342	Y82E9BR.9.1	c01
WBGene00022344	Y82E9BR.11.1	c01
WBGene00022346	Y82E9BR.13.1	c01
WBGene00022349	Y82E9BR.17a.1	c01
WBGene00022353	Y82E9BR.21.2	c01
WBGene00022440	Y110A2AL.3.1	c01
WBGene00022445	Y110A2AL.9.1	c01
WBGene00022467	Y119C1B.1.1	c01
WBGene00022481	Y119D3B.3.1	c01
WBGene00022483	Y119D3B.5.1	c01
WBGene00022527	ZC132.9.1	c01
WBGene00022556	ZC204.6.1	c01
WBGene00022557	ZC204.7.1	c01
WBGene00022558	ZC204.8.1	c01
WBGene00022559	ZC204.9.1	c01
WBGene00022560	ZC204.10.1	c01
WBGene00022562	ZC204.12.1	c01
WBGene00022563	ZC204.13.1	c01
WBGene00022566	ZC239.3.1	c01
WBGene00022568	ZC239.5.1	c01
WBGene00022569	ZC239.6.4	c01
WBGene00022638	ZK6.3.1	c01
WBGene00022651	ZK84.4.1	c01
WBGene00022656	ZK105.5.1	c01
WBGene00022657	ZK105.6.1	c01
WBGene00022670	ZK177.2.1	c01
WBGene00022685	ZK250.2.1	c01
WBGene00022689	ZK250.6.1	c01
WBGene00022690	ZK250.7.1	c01
WBGene00022723	ZK380.2a.1	c01
WBGene00022726	ZK381.3.1	c01
WBGene00022728	ZK402.1.1	c01
WBGene00022729	ZK402.2.1	c01
WBGene00022730	ZK402.3.1	c01
WBGene00022731	ZK402.5.1	c01
WBGene00022756	ZK488.4.1	c01
WBGene00022821	ZK813.2.1	c01
WBGene00022833	ZK973.4.1	c01
WBGene00023410	F47F6.9a.1	c01
WBGene00023427	F14D2.15.2	c01
WBGene00023505	F14F8.13.1	c01
WBGene00023506	T09F5.16.1	c01
WBGene00023515	F08H9.12.1	c01
WBGene00023519	Y60A3A.24.2	c01
WBGene00043068	F32E10.9.1	c01
WBGene00043327	F45D11.7.1	c01
WBGene00043328	F45D11.11.1	c01
WBGene00043985	C44C10.11.1	c01
WBGene00043989	AC8.11.1	c01
WBGene00044034	Y38E10A.28.1	c01
WBGene00044047	Y57A10C.11.1	c01
WBGene00044080	D1086.10c.1	c01
WBGene00044081	D1086.11a.2	c01
WBGene00044100	F20E11.15.1	c01
WBGene00044160	W10C6.2.1	c01
WBGene00044162	F49C5.10.1	c01
WBGene00044163	F49C5.11b.1	c01
WBGene00044164	Y46G5A.39.1	c01
WBGene00044167	C36A4.11.2	c01
WBGene00044181	F09C6.11a.1	c01
WBGene00044184	F11A5.16.1	c01
WBGene00044189	F36D3.14.1	c01
WBGene00044193	F47B8.13.1	c01
WBGene00044194	F47B8.14.1	c01
WBGene00044195	F49A5.10.1	c01
WBGene00044197	F55C9.13.1	c01
WBGene00044200	H37A05.4a.1	c01
WBGene00044201	H39E23.3.1	c01
WBGene00044207	Y6G8.5a.1	c01
WBGene00044208	Y6G8.6.1	c01
WBGene00044211	Y60A3A.25.1	c01
WBGene00044212	Y68A4A.13.1	c01
WBGene00044215	ZK228.10.1	c01
WBGene00044218	F23H12.10.1	c01
WBGene00044227	C07A9.13.1	c01
WBGene00044235	C06A1.7.1	c01
WBGene00044237	C17H1.10.3	c01
WBGene00044242	C54C8.12.1	c01
WBGene00044291	C25F9.10a.1	c01
WBGene00044298	T23B7.2.1	c01
WBGene00044314	M151.8.1	c01
WBGene00044359	C16C4.17b.1	c01
WBGene00044360	C33C12.11.1	c01
WBGene00044364	F34D6.7.1	c01
WBGene00044365	F34D6.8.1	c01
WBGene00044366	F34D6.9.1	c01
WBGene00044371	ZC239.20.1	c01
WBGene00044372	ZC239.21.1	c01
WBGene00044377	Y49F6B.13.1	c01
WBGene00044381	K10G6.5.1	c01
WBGene00044383	T05A7.11.1	c01
WBGene00044384	F11G11.14.1	c01
WBGene00044399	F11F1.8.1	c01
WBGene00044416	C08E3.15.1	c01
WBGene00044417	C08F1.11.1	c01
WBGene00044429	T07H3.7.1	c01
WBGene00044472	F56D6.10.1	c01
WBGene00044474	F56D6.12.1	c01
WBGene00044475	F56D6.13.1	c01
WBGene00044478	K06B9.6.1	c01
WBGene00044501	C55C3.8.1	c01
WBGene00044525	Y73C8B.5a.1	c01
WBGene00044538	T09D3.8.1	c01
WBGene00044547	C13A2.12.1	c01
WBGene00044558	F56C3.10.1	c01
WBGene00044638	F23A7.8.1	c01
WBGene00044663	F26G1.10.1	c01
WBGene00044707	F22G12.7.1	c01
WBGene00044708	C17H1.13b.1	c01
WBGene00044709	C17H1.14.1	c01
WBGene00044711	C17H1.11.1	c01
WBGene00044726	Y53F4B.43.1	c01
WBGene00044733	W08F4.13.1	c01
WBGene00044760	Y71H2AM.25.1	c01
WBGene00044761	Y82E9BR.23b.1	c01
WBGene00044908	F38A1.15.1	c01
WBGene00044911	H38K22.6.1	c01
WBGene00044912	H38K22.7.1	c01
WBGene00044953	D2096.13.1	c01
WBGene00045108	H01G02.4.1	c01
WBGene00045178	Y51H4A.32.1	c01
WBGene00045180	K07F5.17.1	c01
WBGene00045209	F13E9.16.1	c01
WBGene00045211	C18D11.9.1	c01
WBGene00045234	Y26D4A.17a.1	c01
WBGene00045291	F23D12.10b.2	c01
WBGene00045297	C16A11.9.1	c01
WBGene00045344	Y43F8C.23.1	c01
WBGene00045381	F28B1.9.1	c01
WBGene00045382	T05E12.8.5	c01
WBGene00045394	ZK813.7.1	c01
WBGene00045411	C25F9.11.1	c01
WBGene00045412	C25F9.12.1	c01
WBGene00045415	Y43F8B.15.1	c01
WBGene00045455	F26G1.11.1	c01
WBGene00045459	Y59A8B.26a.1	c01
WBGene00045461	C25F9.14a.2	c01
WBGene00045501	Y6G8.8.1	c01
WBGene00045510	F11A5.17.1	c01
WBGene00045511	F11A5.18.1	c01
WBGene00050892	F46B3.18.1	c01
WBGene00050894	F49H6.15.1	c01
WBGene00050899	T10C6.15a.1	c01
WBGene00050904	Y70C5A.3.2	c01
WBGene00050906	F20E11.17.1	c01
WBGene00050913	T12B5.14.1	c01
WBGene00050914	T12B5.15.1	c01
WBGene00050929	F58D12.5.1	c01
WBGene00050934	T19C9.10a.1	c01
WBGene00050955	C14A6.12.1	c01
WBGene00050956	C14A6.13.1	c01
WBGene00050959	F26F2.9.1	c01
WBGene00050967	C25F9.15.1	c01
WBGene00077445	Y51A2A.12.1	c01
WBGene00077495	Y20C6A.4.1	c01
WBGene00077539	Y52B11A.12.1	c01
WBGene00077558	T06D10.3.1	c01
WBGene00077576	C15H11.13.1	c01
WBGene00077616	F57E7.4.1	c01
WBGene00077622	T25E12.14.1	c01
WBGene00077624	Y102A5C.40.1	c01
WBGene00077663	F55C9.14.1	c01
WBGene00077684	Y26D4A.21.1	c01
WBGene00086552	C17D12.9.1	c01
WBGene00086563	K08C9.9.1	c01
WBGene00086565	W06G6.17.1	c01
WBGene00138715	Y6G8.14.1	c01
WBGene00138716	F17B5.10.1	c01
WBGene00164974	F46C3.7.1	c01
WBGene00184956	F49C5.12.1	c01
WBGene00185102	Y105C5A.1268.1	c01
WBGene00189937	Y6G8.15.1	c01
WBGene00189953	R155.5.1	c01
WBGene00189954	F40G9.18.1	c01
WBGene00189956	Y34F4.6b.1	c01
WBGene00194645	Y105C5A.1269.1	c01
WBGene00194646	Y105C5A.1270.1	c01
WBGene00194647	Y51H4A.935.1	c01
WBGene00194651	C33D9.13.2	c01
WBGene00194661	Y57G11C.1131.1	c01
WBGene00194703	F26B1.8.1	c01
WBGene00194704	T07H3.8.1	c01
WBGene00194714	ZC204.17.1	c01
WBGene00194717	ZC239.22.1	c01
WBGene00194727	C18D11.10.1	c01
WBGene00194746	Y82E9BR.25.1	c01
WBGene00194795	F42F12.14.1	c01
WBGene00194801	Y6G8.16.1	c01
WBGene00194815	Y43F8B.23.1	c01
WBGene00194852	T28A8.8a.1	c01
WBGene00194870	F53A2.11.1	c01
WBGene00194895	ZK105.11.1	c01
WBGene00194924	Y51H4A.936.1	c01
WBGene00194925	K08D8.11.1	c01
WBGene00194929	Y105C5B.1413.1	c01
WBGene00194951	Y105C5A.1274.1	c01
WBGene00194957	Y116A8C.465.1	c01
WBGene00194981	Y49E10.30.1	c01
WBGene00194985	Y25C1A.14.1	c01
WBGene00195009	F17E9.16.1	c01
WBGene00195070	C16C8.20.1	c01
WBGene00195071	C16C8.21.1	c01
WBGene00195072	C16C8.22.1	c01
WBGene00195077	T24E12.13.1	c01
WBGene00195146	F54D5.17.1	c01
WBGene00195165	F57G4.11.1	c01
WBGene00195171	T09D3.9.2	c01
WBGene00195176	Y43F8B.24.1	c01
WBGene00195177	Y43F8B.25.1	c01
WBGene00195230	F36D1.13.1	c01
WBGene00195231	F36D1.14.1	c01
WBGene00202498	Y60C6A.2.1	c01
WBGene00202502	F41B5.12a.1	c01
WBGene00206359	C05E4.15a.1	c01
WBGene00206366	C03H5.9.1	c01
WBGene00206389	C29F7.10b.1	c01
WBGene00206392	F47D2.11.1	c01
WBGene00206418	M04C3.5c.1	c01
WBGene00206421	T26G10.8.1	c01
WBGene00206422	T26G10.9.1	c01
WBGene00206462	B0391.14.1	c01
WBGene00206496	Y51A2B.16.1	c01
WBGene00206500	F55C9.15.1	c01
WBGene00206504	K10G4.15.1	c01
WBGene00206508	ZK262.19.1	c01
WBGene00206518	F36H5.12.1	c01
WBGene00206522	F14D2.19.1	c01
WBGene00206523	C54E10.10.1	c01
WBGene00206524	C54E10.11.1	c01
WBGene00219212	K10G4.16.1	c01
WBGene00219235	K03B4.8.1	c01
WBGene00219236	K03B4.9.1	c01
WBGene00219244	Y51H4A.938b.1	c01
WBGene00219271	F36H5.14.1	c01
WBGene00219302	Y43F8B.28.1	c01
WBGene00219308	W06G6.20.1	c01
WBGene00219309	F26F2.13.1	c01
WBGene00219322	C33C12.12.1	c01
WBGene00219332	Y116A8C.467.1	c01
WBGene00219351	Y7A5A.20.1	c01
WBGene00219370	ZK262.20.1	c01
WBGene00219411	T14G12.11.1	c01
WBGene00219414	F14H3.15.1	c01
WBGene00219443	Y57G11C.1144.1	c01
WBGene00219445	C06H5.12.1	c01
WBGene00219446	C06H5.13.1	c01
WBGene00219447	C06H5.14.1	c01
WBGene00219451	F52D2.12.1	c01
WBGene00219454	C26H9A.3.1	c01
WBGene00219491	Y53F4B.62a.1	c01
WBGene00219498	Y106G6E.8.1	c01
WBGene00220250	C09B9.85.1	c01
WBGene00220258	C50C3.19.1	c01
WBGene00235110	T14G12.12.1	c01
WBGene00235112	T23B5.6.1	c01
WBGene00235113	ZK105.12.1	c01
WBGene00235114	ZK105.13.1	c01
WBGene00235120	R105.5.1	c01
WBGene00235269	F59E12.15.1	c01
WBGene00235301	B0513.90.1	c01
WBGene00235304	Y116A8C.468.1	c01
WBGene00235305	Y116A8C.469.1	c01
WBGene00235311	Y57E12B.11.1	c01
WBGene00235317	K04A8.19.1	c01
WBGene00235327	T02B11.10.1	c01
WBGene00235339	F14F8.15.1	c01
WBGene00235351	C32B5.18.1	c01
WBGene00235352	ZK250.13.3	c01
WBGene00235354	ZK250.14.1	c01
WBGene00235358	F56D6.21.1	c01
WBGene00235363	F49F1.2.1	c01
WBGene00235365	F49F1.15.1	c01
WBGene00235367	F49F1.17.1	c01
WBGene00235368	F49F1.18.1	c01
WBGene00235374	R11E3.19.1	c01
WBGene00235390	F56A6.8.1	c01
WBGene00236806	D2024.18.1	c01
WBGene00236809	ZK993.5.1	c01
WBGene00255375	F08B4.8.1	c01
WBGene00255597	Y82E9BR.32.1	c01
WBGene00255731	T02B11.11.1	c01
WBGene00255732	T02B11.12.1	c01
WBGene00255733	T02B11.13.1	c01
WBGene00269378	C07G3.15a.1	c01
WBGene00269385	F41F3.9.1	c01
WBGene00269388	F45C12.17.1	c01
WBGene00269389	C08F1.12a.1	c01
WBGene00269422	T01H10.11.1	c01
WBGene00269435	T27C10.9.1	c01
WBGene00269438	Y56A3A.41.1	c01
WBGene00271415	T05A7.13.1	c01
WBGene00271707	ZK105.14.1	c01
WBGene00271789	K01G12.22.1	c01
WBGene00271803	C09G5.14.1	c01
WBGene00271810	C27H5.12.1	c01
WBGene00271815	K04A8.21.1	c01
WBGene00271832	Y60C6A.3.1	c01
WBGene00284850	Y46B2A.4.1	c01
WBGene00284854	Y95D11A.5.1	c01
WBGene00303369	Y49F6B.20.1	c01
WBGene00304173	F07E5.13.1	c01
WBGene00304775	Y38E10A.34.1	c01
WBGene00304786	C36C9.12.1	c01
WBGene00304797	F31B9.7.1	c01
WBGene00304806	F41G4.13.1	c01
WBGene00305092	C16C8.25.1	c01
WBGene00305093	C16C8.27.1	c01
WBGene00305102	C46F9.5.1	c01
WBGene00305104	C46F9.6.1	c01
WBGene00305111	F22E5.22.1	c01
WBGene00305113	F36H5.18.1	c01
WBGene00305114	F43C11.16.1	c01
WBGene00305130	F49C5.16.1	c01
WBGene00305158	Y16E11A.4.3	c01
WBGene00007423	C08B6.2a.1	c02
WBGene00000012	C50F2.9.1	c02
WBGene00000024	AC3.3.1	c02
WBGene00000025	F19G12.7.1	c02
WBGene00000027	Y5H2A.3.1	c02
WBGene00000028	Y105C5A.4.1	c02
WBGene00000556	R09B5.3a.1	c02
WBGene00000557	R09B5.8.1	c02
WBGene00000560	Y46E12A.1.1	c02
WBGene00000606	F11G11.10.4	c02
WBGene00000819	Y48E1B.13a.1	c02
WBGene00001164	F15A2.5.1	c02
WBGene00001482	Y113G7B.5b.1	c02
WBGene00001867	T07G12.12a.1	c02
WBGene00001946	Y49E10.6a.2	c02
WBGene00002096	C17C3.18.1	c02
WBGene00002097	F41G3.16.2	c02
WBGene00002104	M04D8.1.1	c02
WBGene00002111	ZC334.9.1	c02
WBGene00002115	Y8A9A.6.1	c02
WBGene00002116	W09C5.4.1	c02
WBGene00002199	M176.6a.1	c02
WBGene00002200	M176.7.2	c02
WBGene00002211	M01B2.1.1	c02
WBGene00003031	R186.4.1	c02
WBGene00003180	T24D3.1.1	c02
WBGene00003181	K04C2.6.1	c02
WBGene00003540	T11F9.5.1	c02
WBGene00003541	T11F9.6.1	c02
WBGene00003608	ZK418.1.1	c02
WBGene00003640	C06C6.5a.3	c02
WBGene00003641	K06B4.1.1	c02
WBGene00003642	K06B4.2.1	c02
WBGene00003648	R11G11.2.1	c02
WBGene00003653	C06C6.4.1	c02
WBGene00003655	Y17D7A.3b.1	c02
WBGene00003680	ZK488.2.2	c02
WBGene00003696	T01G6.4.1	c02
WBGene00003698	F35E8.12.2	c02
WBGene00003721	T01G6.2a.1	c02
WBGene00003722	R11G11.1.2	c02
WBGene00003743	F35C11.1.2	c02
WBGene00003761	T24D8.4.1	c02
WBGene00003762	F35B12.7.2	c02
WBGene00003770	F30H5.2.1	c02
WBGene00003779	Y75B8A.2a.2	c02
WBGene00003862	C08H9.5.1	c02
WBGene00003863	ZK938.5.1	c02
WBGene00003977	F56G4.2.1	c02
WBGene00004098	AC3.4.1	c02
WBGene00004158	Y105C5A.3.1	c02
WBGene00004159	Y105C5A.5.1	c02
WBGene00004160	Y105C5A.6.1	c02
WBGene00004163	Y39A3CR.7.1	c02
WBGene00004170	Y73F8A.8.1	c02
WBGene00004171	Y73F8A.9.1	c02
WBGene00004783	Y73B6BL.5d.1	c02
WBGene00004827	K08H2.1.1	c02
WBGene00004945	C50E10.4b.1	c02
WBGene00004974	F25H8.7.1	c02
WBGene00005099	W06G6.3.1	c02
WBGene00005148	C13B7.4a.1	c02
WBGene00005203	F32H5.5.1	c02
WBGene00005205	Y43B11AR.5.1	c02
WBGene00005342	C18B10.8.1	c02
WBGene00005344	F37B4.1.1	c02
WBGene00005400	C50H11.7.1	c02
WBGene00005447	F37B4.13a.1	c02
WBGene00005448	F37B4.6.1	c02
WBGene00005449	F37B4.3.1	c02
WBGene00005450	C03G6.9.1	c02
WBGene00005451	F31F4.9.1	c02
WBGene00005452	F31F4.18.1	c02
WBGene00005453	C31B8.13.1	c02
WBGene00005454	H05B21.2.1	c02
WBGene00005456	C49D10.3.1	c02
WBGene00005457	R08H2.4.1	c02
WBGene00005458	T19C9.3.1	c02
WBGene00005482	K05D4.6a.1	c02
WBGene00005484	F11A5.2.1	c02
WBGene00005486	F11A5.1.1	c02
WBGene00005487	T21D12.5.1	c02
WBGene00005488	C47A10.2.1	c02
WBGene00005489	C47A10.3.1	c02
WBGene00005490	Y59A8A.4.1	c02
WBGene00005491	C47A10.9.1	c02
WBGene00005492	C47A10.7.1	c02
WBGene00005493	C47A10.10.1	c02
WBGene00005494	C47A10.11.1	c02
WBGene00005495	Y94A7B.3.1	c02
WBGene00005496	Y94A7B.1.1	c02
WBGene00005497	K08G2.8.1	c02
WBGene00005499	ZK1037.8.1	c02
WBGene00005500	Y94A7B.4.1	c02
WBGene00005501	C17F4.4.1	c02
WBGene00005502	Y94A7B.5.1	c02
WBGene00005503	K08G2.9.1	c02
WBGene00005504	Y94A7B.6.1	c02
WBGene00005505	Y94A7B.8.1	c02
WBGene00005507	Y94A7B.7.1	c02
WBGene00005508	Y94A7B.9.1	c02
WBGene00005609	F28H7.11.1	c02
WBGene00005679	Y45F10B.4.1	c02
WBGene00005680	T04A11.10.1	c02
WBGene00005681	T04A11.9.1	c02
WBGene00005683	T04A11.7a.1	c02
WBGene00005749	T03D3.3.1	c02
WBGene00005807	T11F1.1.1	c02
WBGene00005808	H25K10.7a.1	c02
WBGene00005809	T05A6.6.1	c02
WBGene00005810	Y37A1B.10.1	c02
WBGene00006104	F37B4.12.1	c02
WBGene00006108	T23D5.9.1	c02
WBGene00006109	C42D4.4.1	c02
WBGene00006110	T09F5.3.1	c02
WBGene00006111	C31B8.6a.1	c02
WBGene00006117	C45H4.12.1	c02
WBGene00006120	F26D2.7.1	c02
WBGene00006121	T06C12.3.1	c02
WBGene00006122	T06C12.2.1	c02
WBGene00006124	T06C12.1.1	c02
WBGene00006125	F14F8.1.1	c02
WBGene00006126	C17B7.1.1	c02
WBGene00006127	T28A11.1.1	c02
WBGene00006128	Y73C8C.5.1	c02
WBGene00006129	K10C9.6.1	c02
WBGene00006130	Y73C8C.6a.1	c02
WBGene00006131	Y73C8C.11.1	c02
WBGene00006133	T23F1.4.1	c02
WBGene00006134	F26D2.1.1	c02
WBGene00006135	C14H10.4.1	c02
WBGene00006136	C01B4.10.1	c02
WBGene00006272	F32A7.7.1	c02
WBGene00006273	W09D6.3.1	c02
WBGene00006274	B0213.9.1	c02
WBGene00006275	C55A1.3.1	c02
WBGene00006276	C42D4.12.1	c02
WBGene00006277	C06B3.10.1	c02
WBGene00006278	C06B3.9.1	c02
WBGene00006289	B0391.12.1	c02
WBGene00006464	T07H3.1.1	c02
WBGene00006471	Y32B12B.6.1	c02
WBGene00006553	Y47D3A.10.1	c02
WBGene00006718	C28G1.1.1	c02
WBGene00006732	F26H9.7a.2	c02
WBGene00006902	F44F1.7.1	c02
WBGene00007083	AH10.2.1	c02
WBGene00007091	B0001.6.2	c02
WBGene00007123	B0250.6.1	c02
WBGene00007127	B0250.10.1	c02
WBGene00007131	B0284.1.1	c02
WBGene00007132	B0284.2.1	c02
WBGene00007134	B0284.4.1	c02
WBGene00007162	B0391.5.1	c02
WBGene00007163	B0391.6.1	c02
WBGene00007164	B0391.9.1	c02
WBGene00007166	B0391.11a.1	c02
WBGene00007230	C01G10.1.1	c02
WBGene00007241	C01G10.16.1	c02
WBGene00007288	C04A11.5.2	c02
WBGene00007319	C05B5.1.1	c02
WBGene00007348	C05G5.2b.1	c02
WBGene00007360	C06B3.1.1	c02
WBGene00007381	C06C6.7.1	c02
WBGene00007431	C08B6.11.3	c02
WBGene00007441	C08E8.5.1	c02
WBGene00007442	C08E8.6.1	c02
WBGene00007447	C08F8.5.1	c02
WBGene00007452	C08F11.3.1	c02
WBGene00007453	C08F11.5a.1	c02
WBGene00007454	C08F11.7.1	c02
WBGene00007456	C08F11.9.1	c02
WBGene00007460	C08F11.13b.1	c02
WBGene00007466	C08H9.6.1	c02
WBGene00007558	C14A4.7a.1	c02
WBGene00007657	C17H1.4a.1	c02
WBGene00007659	C17H1.6.1	c02
WBGene00007660	C17H1.7.1	c02
WBGene00007716	C25D7.4a.1	c02
WBGene00007762	C27B7.5.1	c02
WBGene00007805	C29F3.4.1	c02
WBGene00007806	C29F3.5.1	c02
WBGene00007831	C31A11.3.1	c02
WBGene00007832	C31A11.4.1	c02
WBGene00007837	C31C9.3.1	c02
WBGene00007841	C31C9.7.2	c02
WBGene00007847	C31E10.6.1	c02
WBGene00007853	C31G12.4b.1	c02
WBGene00007858	C31H5.7.1	c02
WBGene00007865	C32H11.2.1	c02
WBGene00007868	C32H11.5.2	c02
WBGene00007869	C32H11.6.1	c02
WBGene00007871	C32H11.8.1	c02
WBGene00007874	C32H11.11.1	c02
WBGene00007887	C33A12.12.1	c02
WBGene00007937	C34E11.4.1	c02
WBGene00008009	C38D9.1.1	c02
WBGene00008014	C38D9.6.1	c02
WBGene00008015	C38D9.7.1	c02
WBGene00008016	C38D9.8.1	c02
WBGene00008017	C38D9.9.1	c02
WBGene00008058	C41G6.12.1	c02
WBGene00008059	C41G6.13.1	c02
WBGene00008100	C44H9.5a.1	c02
WBGene00008101	C44H9.6.1	c02
WBGene00008113	C46C2.5.1	c02
WBGene00008152	C47E12.9.2	c02
WBGene00008156	C47E12.13a.1	c02
WBGene00008170	C48B4.7.1	c02
WBGene00008177	C48D1.1a.1	c02
WBGene00008178	C48D1.5c.1	c02
WBGene00008195	C49C3.5.1	c02
WBGene00008198	C49C3.8a.1	c02
WBGene00008206	C49F5.2.1	c02
WBGene00008208	C49F5.4.1	c02
WBGene00008217	C50B6.1.1	c02
WBGene00008242	C50H2.6.1	c02
WBGene00008255	C51E3.10c.1	c02
WBGene00008310	C54E10.6.1	c02
WBGene00008327	C55A1.12.1	c02
WBGene00008352	cTel54X.1.1	c02
WBGene00008353	D1025.1.1	c02
WBGene00008381	D1081.3.1	c02
WBGene00008384	D1081.6.1	c02
WBGene00008470	E03H4.2.1	c02
WBGene00008549	F07A11.6b.1	c02
WBGene00008557	F07H5.6.1	c02
WBGene00008574	F08E10.2.1	c02
WBGene00008611	F09C3.3.1	c02
WBGene00008612	F09C3.4.1	c02
WBGene00008613	F09C3.5.1	c02
WBGene00008616	F09C6.2.1	c02
WBGene00008618	F09C6.6.1	c02
WBGene00008619	F09C6.8.1	c02
WBGene00008632	F10A3.2.1	c02
WBGene00008633	F10A3.3.1	c02
WBGene00008679	F11A5.13.1	c02
WBGene00008727	F13A7.12.1	c02
WBGene00008734	F13B12.7.1	c02
WBGene00008795	F14D7.8.1	c02
WBGene00008812	F14F7.5a.1	c02
WBGene00008814	F14F8.3.1	c02
WBGene00008826	F14H3.7.1	c02
WBGene00008830	F14H3.11.1	c02
WBGene00008847	F15A4.13.1	c02
WBGene00008850	F15B9.6.1	c02
WBGene00008870	F15H9.1.1	c02
WBGene00008884	F16B12.8.1	c02
WBGene00008901	F16H9.2a.1	c02
WBGene00008904	F17A2.13.1	c02
WBGene00008917	F17C11.6.1	c02
WBGene00008947	F19B2.8.1	c02
WBGene00008955	F19D8.2.1	c02
WBGene00008968	F20C5.3b.1	c02
WBGene00008981	F20E11.1.1	c02
WBGene00009015	F21D9.1.1	c02
WBGene00009070	F23A7.5.1	c02
WBGene00009077	F23B2.10.1	c02
WBGene00009091	F23D12.7.3	c02
WBGene00009117	F25H2.3.1	c02
WBGene00009146	F26C11.1.2	c02
WBGene00009149	F26D2.10.1	c02
WBGene00009190	F27D4.6b.1	c02
WBGene00009212	F28D1.2.1	c02
WBGene00009222	F28F8.4.1	c02
WBGene00009225	F28F8.8a.2	c02
WBGene00009247	F29C12.5.1	c02
WBGene00009279	F31B9.2.1	c02
WBGene00009281	F31B9.4.1	c02
WBGene00009296	F31E9.3.1	c02
WBGene00009297	F31E9.4.1	c02
WBGene00009298	F31E9.5.1	c02
WBGene00009374	F34D10.4.2	c02
WBGene00009390	F35C5.1.2	c02
WBGene00009412	F35E2.5.1	c02
WBGene00009427	F35E12.3.1	c02
WBGene00009468	F36D1.9.1	c02
WBGene00009469	F36D3.1.1	c02
WBGene00009471	F36D3.5.1	c02
WBGene00009481	F36F2.8.1	c02
WBGene00009486	F36G9.7.1	c02
WBGene00009489	F36G9.13.1	c02
WBGene00009490	F36G9.14.1	c02
WBGene00009510	F37D6.4.1	c02
WBGene00009533	F38B7.2b.1	c02
WBGene00009546	F38H4.2.1	c02
WBGene00009569	F40D4.9a.1	c02
WBGene00009601	F40G12.6.1	c02
WBGene00009623	F41E7.7b.1	c02
WBGene00009660	F43G6.8.1	c02
WBGene00009687	F44D12.10.1	c02
WBGene00009689	F44E5.2.1	c02
WBGene00009696	F44F1.4.1	c02
WBGene00009698	F44F1.6a.1	c02
WBGene00009709	F44G3.8b.1	c02
WBGene00009721	F45D3.1.1	c02
WBGene00009749	F46A8.6.1	c02
WBGene00009759	F46B3.4a.1	c02
WBGene00009760	F46B3.7.1	c02
WBGene00009761	F46B3.8.1	c02
WBGene00009763	F46B3.11.1	c02
WBGene00009775	F46B6.10.1	c02
WBGene00009823	F47G4.2.1	c02
WBGene00009836	F47H4.4.1	c02
WBGene00009839	F47H4.8.1	c02
WBGene00009840	F47H4.9.1	c02
WBGene00009861	F49B2.1.1	c02
WBGene00009862	F49B2.2.1	c02
WBGene00009872	F49C12.2.1	c02
WBGene00009874	F49C12.4.1	c02
WBGene00009927	F52B11.5.1	c02
WBGene00009946	F52H3.4.2	c02
WBGene00009963	F53B6.8.1	c02
WBGene00009979	F53F1.1.1	c02
WBGene00010000	F53F8.3.1	c02
WBGene00010004	F53H2.1a.1	c02
WBGene00010007	F53H4.2.1	c02
WBGene00010009	F53H4.4.1	c02
WBGene00010016	F54B8.1.1	c02
WBGene00010017	F54B8.2.1	c02
WBGene00010018	F54B8.3.2	c02
WBGene00010020	F54B8.6.1	c02
WBGene00010021	F54B8.7a.1	c02
WBGene00010022	F54B8.8.1	c02
WBGene00010023	F54B8.9.1	c02
WBGene00010025	F54B8.11.1	c02
WBGene00010026	F54B8.12.1	c02
WBGene00010031	F54B11.8.1	c02
WBGene00010066	F54F7.6.2	c02
WBGene00010072	F54F12.1.1	c02
WBGene00010114	F55D12.6.1	c02
WBGene00010133	F55H12.2.1	c02
WBGene00010140	F56A8.4.2	c02
WBGene00010141	F56A8.5.1	c02
WBGene00010158	F56G4.3.1	c02
WBGene00010180	F57A8.5.1	c02
WBGene00010183	F57A8.8.1	c02
WBGene00010193	F57C2.1.1	c02
WBGene00010194	F57C2.2.1	c02
WBGene00010212	F57G4.8.1	c02
WBGene00010215	F57G8.6.1	c02
WBGene00010227	F58A4.2.1	c02
WBGene00010253	F58E6.4.1	c02
WBGene00010293	F59A1.7.2	c02
WBGene00010352	H02I12.2.1	c02
WBGene00010355	H02K04.1.1	c02
WBGene00010360	H03G16.4.1	c02
WBGene00010363	H04D03.2a.1	c02
WBGene00010365	H04D03.4.1	c02
WBGene00010388	H12I19.1.1	c02
WBGene00010389	H12I19.2.1	c02
WBGene00010394	H12I19.7.1	c02
WBGene00010447	K01A6.5a.1	c02
WBGene00010461	K01D12.1.1	c02
WBGene00010495	K02B12.2.1	c02
WBGene00010504	K02D3.1.1	c02
WBGene00010508	K02E2.7b.1	c02
WBGene00010509	K02E2.8a.1	c02
WBGene00010526	K03B8.11.1	c02
WBGene00010527	K03D3.1.1	c02
WBGene00010530	K03D3.4.1	c02
WBGene00010534	K03D7.7.1	c02
WBGene00010541	K03H1.6.2	c02
WBGene00010580	K05C4.3.1	c02
WBGene00010585	K05C4.9a.1	c02
WBGene00010599	K06B4.4.1	c02
WBGene00010600	K06B4.5.1	c02
WBGene00010601	K06B4.6.2	c02
WBGene00010602	K06B4.7.1	c02
WBGene00010603	K06B4.8.1	c02
WBGene00010652	K08C9.5.1	c02
WBGene00010686	K08F9.3b.1	c02
WBGene00010687	K08F9.4.1	c02
WBGene00010726	K09E9.3a.1	c02
WBGene00010737	K10C8.4.2	c02
WBGene00010764	K10H10.9.1	c02
WBGene00010797	M01B2.3.1	c02
WBGene00010798	M01B2.4.1	c02
WBGene00010799	M01B2.6.1	c02
WBGene00010801	M01B2.8.1	c02
WBGene00010808	M01E5.6.1	c02
WBGene00010837	M03B6.5.1	c02
WBGene00010933	M162.7.1	c02
WBGene00010934	M162.8.1	c02
WBGene00010945	M176.8.1	c02
WBGene00011127	R07H5.7.1	c02
WBGene00011135	R08A2.4.1	c02
WBGene00011150	R08H2.9.1	c02
WBGene00011157	R09D1.1.1	c02
WBGene00011158	R09D1.2.1	c02
WBGene00011159	R09D1.3.1	c02
WBGene00011161	R09D1.5.1	c02
WBGene00011162	R09D1.6.1	c02
WBGene00011164	R09D1.8.1	c02
WBGene00011166	R09D1.10.1	c02
WBGene00011167	R09D1.11a.1	c02
WBGene00011168	R09D1.12.1	c02
WBGene00011169	R09D1.13.1	c02
WBGene00011170	R09D1.14.1	c02
WBGene00011172	R09E10.2.1	c02
WBGene00011191	R10D12.10.1	c02
WBGene00011243	R11D1.2.1	c02
WBGene00011267	R17.1.1	c02
WBGene00011339	T01G5.1.1	c02
WBGene00011388	T02G6.5b.1	c02
WBGene00011431	T04D3.1.1	c02
WBGene00011432	T04D3.2.1	c02
WBGene00011478	T05D4.5.1	c02
WBGene00011506	T05G11.2.1	c02
WBGene00011513	T06C12.4.2	c02
WBGene00011541	T06E6.11.1	c02
WBGene00011542	T06E6.13.1	c02
WBGene00011565	T07C5.2.1	c02
WBGene00011566	T07C5.3.1	c02
WBGene00011568	T07C5.5.2	c02
WBGene00011581	T07D10.1.1	c02
WBGene00011597	T07G12.6b.1	c02
WBGene00011600	T07G12.10.3	c02
WBGene00011601	T07G12.11a.1	c02
WBGene00011670	T09F5.11.1	c02
WBGene00011689	T10C6.7.1	c02
WBGene00011691	T10C6.10a.1	c02
WBGene00011741	T12G3.6b.1	c02
WBGene00011752	T13F3.5.1	c02
WBGene00011840	T19C9.1.1	c02
WBGene00011846	T19H5.1b.1	c02
WBGene00011847	T19H5.2.1	c02
WBGene00011848	T19H5.3.1	c02
WBGene00011876	T21B4.1.1	c02
WBGene00011930	T22G5.3.1	c02
WBGene00011973	T23G11.10.1	c02
WBGene00011983	T24C2.4.1	c02
WBGene00011990	T24D5.2.1	c02
WBGene00012027	T25E12.12.1	c02
WBGene00012042	T26E3.10.1	c02
WBGene00012050	T26E4.8.1	c02
WBGene00012088	T27E7.3.1	c02
WBGene00012089	T27E7.4.1	c02
WBGene00012090	T27E7.5.1	c02
WBGene00012091	T27E7.6.1	c02
WBGene00012093	T27E7.9.1	c02
WBGene00012174	W01B6.8.1	c02
WBGene00012194	W02A11.3.1	c02
WBGene00012195	W02A11.5.2	c02
WBGene00012196	W02A11.8.1	c02
WBGene00012232	W04A4.3.1	c02
WBGene00012246	W04E12.1.1	c02
WBGene00012270	W04G5.10.1	c02
WBGene00012396	Y6D1A.2.1	c02
WBGene00012446	Y17D7A.1.1	c02
WBGene00012450	Y17D7B.2.1	c02
WBGene00012451	Y17D7B.3.1	c02
WBGene00012456	Y17D7C.2.1	c02
WBGene00012467	Y17G7B.14.1	c02
WBGene00012505	Y26D4A.8.1	c02
WBGene00012521	Y32B12B.1a.1	c02
WBGene00012523	Y32B12B.3.1	c02
WBGene00012533	Y36E3A.1.1	c02
WBGene00012551	Y37D8A.11a.1	c02
WBGene00012564	Y37H2A.4.1	c02
WBGene00012565	Y37H2A.5b.1	c02
WBGene00012566	Y37H2A.6.1	c02
WBGene00012567	Y37H2A.7.1	c02
WBGene00012574	Y37H2C.3.1	c02
WBGene00012584	Y38E10A.6b.2	c02
WBGene00012586	Y38E10A.8.1	c02
WBGene00012597	Y38E10A.19.1	c02
WBGene00012615	Y38H6C.1a.2	c02
WBGene00012640	Y38H8A.7.2	c02
WBGene00012654	Y39A1A.16.1	c02
WBGene00012655	Y39A1A.17.1	c02
WBGene00012668	Y39B6A.5a.1	c02
WBGene00012689	Y39B6A.30.1	c02
WBGene00012702	Y39B6A.46.1	c02
WBGene00012703	Y39B6A.47a.1	c02
WBGene00012841	Y43F11A.1.1	c02
WBGene00012844	Y43F11A.4.1	c02
WBGene00012851	Y44A6C.2.1	c02
WBGene00012874	Y45F10B.12.1	c02
WBGene00012879	Y45F10C.3.1	c02
WBGene00012921	Y46G5A.36.1	c02
WBGene00012923	Y47D3A.2.1	c02
WBGene00012953	Y47H9C.10.1	c02
WBGene00012955	Y47H9C.12.1	c02
WBGene00012958	Y47H10A.2.1	c02
WBGene00012965	Y48A6B.4.2	c02
WBGene00013023	Y48G10A.6.1	c02
WBGene00013053	Y50E8A.10.1	c02
WBGene00013054	Y50E8A.11.1	c02
WBGene00013069	Y51A2B.5.1	c02
WBGene00013070	Y51A2B.6.1	c02
WBGene00013071	Y51A2B.8.1	c02
WBGene00013089	Y51B9A.7.1	c02
WBGene00013142	Y53C12A.7.1	c02
WBGene00013254	Y57A10A.9.1	c02
WBGene00013275	Y57A10B.3.1	c02
WBGene00013294	Y57G11B.1.1	c02
WBGene00013296	Y57G11B.3.1	c02
WBGene00013304	Y57G11C.6.1	c02
WBGene00013348	Y59A8B.11a.2	c02
WBGene00013395	Y62H9A.7.1	c02
WBGene00013396	Y62H9A.8.1	c02
WBGene00013402	Y62H9A.14b.1	c02
WBGene00013403	Y63D3A.2.1	c02
WBGene00013404	Y63D3A.3.1	c02
WBGene00013408	Y63D3A.9a.1	c02
WBGene00013409	Y63D3A.10.1	c02
WBGene00013453	Y67A10A.4.1	c02
WBGene00013454	Y67A10A.5.1	c02
WBGene00013466	Y68A4A.2.1	c02
WBGene00013482	Y69H2.7b.1	c02
WBGene00013483	Y69H2.8.1	c02
WBGene00013484	Y69H2.9.1	c02
WBGene00013509	Y71A12B.12a.1	c02
WBGene00013512	Y71A12C.1.1	c02
WBGene00013549	Y75B8A.13.1	c02
WBGene00013555	Y75B8A.21.1	c02
WBGene00013566	Y75B12A.2.1	c02
WBGene00013570	Y75B12B.8.1	c02
WBGene00013572	Y75B12B.10.1	c02
WBGene00013584	Y80D3A.4.1	c02
WBGene00013586	Y80D3A.8.1	c02
WBGene00013610	Y102A5C.1.2	c02
WBGene00013616	Y102A5C.9.1	c02
WBGene00013619	Y102A5C.13.1	c02
WBGene00013620	Y102A5C.14.1	c02
WBGene00013623	Y102A5C.19.1	c02
WBGene00013626	Y102A5C.25.1	c02
WBGene00013651	Y105C5B.11b.1	c02
WBGene00013659	Y105C5B.20.1	c02
WBGene00013721	Y106G6H.9.1	c02
WBGene00013754	Y113G7B.1b.1	c02
WBGene00013755	Y113G7B.3.1	c02
WBGene00013756	Y113G7B.4.1	c02
WBGene00013757	Y113G7B.6.1	c02
WBGene00013758	Y113G7B.7.1	c02
WBGene00013771	Y113G7C.1.1	c02
WBGene00013806	Y116A8C.29.1	c02
WBGene00013809	Y116A8C.33a.1	c02
WBGene00013820	Y116F11B.2.1	c02
WBGene00013824	Y116F11B.8.1	c02
WBGene00013836	ZC47.3.2	c02
WBGene00013837	ZC47.4.1	c02
WBGene00013838	ZC47.5.2	c02
WBGene00013839	ZC47.6.1	c02
WBGene00013840	ZC47.7.1	c02
WBGene00013844	ZC47.13a.1	c02
WBGene00013845	ZC47.14.2	c02
WBGene00013868	ZC373.3a.1	c02
WBGene00013887	ZC412.6.1	c02
WBGene00013940	ZK218.6.1	c02
WBGene00013951	ZK262.4.1	c02
WBGene00014049	ZK666.11a.1	c02
WBGene00014149	ZK909.5.1	c02
WBGene00014159	ZK938.2.1	c02
WBGene00014183	ZK1025.3.1	c02
WBGene00014193	ZK1037.5.1	c02
WBGene00014198	ZK1053.3.1	c02
WBGene00014199	ZK1053.4.1	c02
WBGene00014223	ZK1098.6.1	c02
WBGene00014679	C18D4.5.1	c02
WBGene00014999	AH9.3.2	c02
WBGene00015004	B0034.4.1	c02
WBGene00015012	B0047.1.1	c02
WBGene00015014	B0047.3.1	c02
WBGene00015015	B0047.4.1	c02
WBGene00015018	B0205.2a.1	c02
WBGene00015033	B0207.10.1	c02
WBGene00015063	B0228.6.1	c02
WBGene00015065	B0228.8.1	c02
WBGene00015067	B0238.1.1	c02
WBGene00015071	B0238.7.1	c02
WBGene00015118	B0294.3.1	c02
WBGene00015139	B0310.3.1	c02
WBGene00015180	B0416.4.1	c02
WBGene00015182	B0416.7a.2	c02
WBGene00015183	B0432.1.1	c02
WBGene00015223	B0507.6.2	c02
WBGene00015225	B0507.8.1	c02
WBGene00015226	B0507.9.1	c02
WBGene00015229	B0511.3.1	c02
WBGene00015262	B0563.5.1	c02
WBGene00015265	B0563.8.1	c02
WBGene00015281	C01B10.7a.1	c02
WBGene00015306	C01G5.4a.1	c02
WBGene00015357	C02F12.8.1	c02
WBGene00015362	C02H6.2.1	c02
WBGene00015376	C03B1.5.1	c02
WBGene00015407	C03H5.5.1	c02
WBGene00015411	C04C3.1.1	c02
WBGene00015453	C04G6.2.1	c02
WBGene00015489	C05E4.7.1	c02
WBGene00015528	C06E2.2.1	c02
WBGene00015529	C06E2.5.1	c02
WBGene00015549	C06G3.3.1	c02
WBGene00015582	C07H6.9b.1	c02
WBGene00015590	C08C3.2b.1	c02
WBGene00015595	C08E3.3.1	c02
WBGene00015598	C08E3.6.1	c02
WBGene00015599	C08E3.7.1	c02
WBGene00015600	C08E3.8.1	c02
WBGene00015601	C08E3.9.1	c02
WBGene00015602	C08E3.10a.1	c02
WBGene00015604	C08E3.12.1	c02
WBGene00015624	C09B8.5.1	c02
WBGene00015630	C09B9.7.1	c02
WBGene00015652	C09G12.2.1	c02
WBGene00015653	C09G12.3.1	c02
WBGene00015656	C09G12.6.1	c02
WBGene00015672	C10E2.1.1	c02
WBGene00015710	C12D5.9.1	c02
WBGene00015711	C12D5.10.1	c02
WBGene00015721	C13A2.4.2	c02
WBGene00015725	C13A2.9.1	c02
WBGene00015726	C13A2.10.1	c02
WBGene00015736	C13D9.4.1	c02
WBGene00015737	C13D9.5.1	c02
WBGene00015738	C13D9.6.1	c02
WBGene00015748	C14A11.2.1	c02
WBGene00015816	C16A11.3a.1	c02
WBGene00015817	C16A11.4a.2	c02
WBGene00015830	C16C4.6.1	c02
WBGene00015856	C16C8.19.1	c02
WBGene00015864	C16D9.9.1	c02
WBGene00015885	C17B7.11.1	c02
WBGene00015890	C17C3.5.1	c02
WBGene00015891	C17C3.6.1	c02
WBGene00015896	C17C3.15.2	c02
WBGene00015897	C17E7.1.1	c02
WBGene00015903	C17E7.9a.1	c02
WBGene00015906	C17E7.13.1	c02
WBGene00015907	C17F3.1.1	c02
WBGene00015937	C17H12.12.1	c02
WBGene00015944	C18A3.7.1	c02
WBGene00015972	C18E3.3.1	c02
WBGene00015988	C18H2.1.1	c02
WBGene00015992	C18H2.5.1	c02
WBGene00016009	C23F12.4.2	c02
WBGene00016017	C23G10.11.1	c02
WBGene00016053	C24D10.1.1	c02
WBGene00016056	C24D10.5.1	c02
WBGene00016071	C24H12.1.1	c02
WBGene00016077	C24H12.8.1	c02
WBGene00016102	C25F6.1.1	c02
WBGene00016155	C27A12.4.1	c02
WBGene00016178	C28C12.2.1	c02
WBGene00016227	C29F9.13.1	c02
WBGene00016233	C29G2.5.1	c02
WBGene00016254	C30E1.5.1	c02
WBGene00016268	C30G4.2.1	c02
WBGene00016297	C32B5.4.1	c02
WBGene00016298	C32B5.5a.1	c02
WBGene00016302	C32B5.9.1	c02
WBGene00016303	C32B5.10.1	c02
WBGene00016307	C32B5.14a.1	c02
WBGene00016309	C32B5.16.1	c02
WBGene00016320	C32E8.1.1	c02
WBGene00016345	C33E10.1.1	c02
WBGene00016346	C33E10.2.1	c02
WBGene00016349	C33E10.8.1	c02
WBGene00016359	C33F10.13.1	c02
WBGene00016361	C33G8.3.1	c02
WBGene00016369	C33G8.13.1	c02
WBGene00016370	C33H5.1.1	c02
WBGene00016403	C34D4.11a.1	c02
WBGene00016444	C35D10.7a.2	c02
WBGene00016453	C35E7.1a.1	c02
WBGene00016458	C35E7.6.1	c02
WBGene00016466	C36B7.3.1	c02
WBGene00016486	C36C9.3.1	c02
WBGene00016517	C38C3.9.1	c02
WBGene00016519	C39B5.1.1	c02
WBGene00016521	C39B5.3.1	c02
WBGene00016522	C39B5.4.1	c02
WBGene00016525	C39B5.7.1	c02
WBGene00016527	C39B5.9.1	c02
WBGene00016537	C39E6.2.1	c02
WBGene00016578	C41H7.8.1	c02
WBGene00016617	C43H6.4.1	c02
WBGene00016646	C44C8.1.1	c02
WBGene00016647	C44C8.2.1	c02
WBGene00016648	C44C8.3.1	c02
WBGene00016649	C44C8.4.1	c02
WBGene00016665	C45E5.2.1	c02
WBGene00016681	C45G9.10b.1	c02
WBGene00016707	C46E10.1.1	c02
WBGene00016754	C48E7.11.2	c02
WBGene00016756	C49A9.2.2	c02
WBGene00016757	C49A9.3.1	c02
WBGene00016766	C49C8.2.1	c02
WBGene00016813	C50E3.1.1	c02
WBGene00016815	C50E3.3.1	c02
WBGene00016825	C50E10.1.1	c02
WBGene00016862	C52A10.1.1	c02
WBGene00016863	C52A10.2.1	c02
WBGene00016864	C52A10.3.1	c02
WBGene00016880	C52E2.1.1	c02
WBGene00016885	C52E2.6.1	c02
WBGene00016886	C52E2.7.1	c02
WBGene00016891	C53A3.1.1	c02
WBGene00016899	C53C11.1.1	c02
WBGene00016924	C54F6.6.1	c02
WBGene00016926	C54F6.8.1	c02
WBGene00016927	C54F6.9.1	c02
WBGene00016929	C54F6.12.1	c02
WBGene00016941	C55B6.5.1	c02
WBGene00017007	D1007.10b.1	c02
WBGene00017068	D2092.8.1	c02
WBGene00017099	E02H9.1.1	c02
WBGene00017102	E02H9.4.1	c02
WBGene00017106	E02H9.9.1	c02
WBGene00017113	E03H12.6.1	c02
WBGene00017116	E04A4.1.1	c02
WBGene00017135	EEED8.4.2	c02
WBGene00017140	EEED8.12.1	c02
WBGene00017142	EEED8.14.2	c02
WBGene00017143	EEED8.15.1	c02
WBGene00017181	F02E11.3.1	c02
WBGene00017197	F07C3.9.1	c02
WBGene00017207	F07E5.1.1	c02
WBGene00017213	F07E5.8.1	c02
WBGene00017221	F07G6.1.1	c02
WBGene00017225	F07G6.6.1	c02
WBGene00017226	F07G6.7.1	c02
WBGene00017228	F07G11.1.1	c02
WBGene00017229	F07G11.2.1	c02
WBGene00017248	F08D12.4a.1	c02
WBGene00017249	F08D12.6.1	c02
WBGene00017250	F08D12.7.1	c02
WBGene00017251	F08D12.8.1	c02
WBGene00017252	F08D12.9.1	c02
WBGene00017253	F08D12.10.1	c02
WBGene00017254	F08D12.11.1	c02
WBGene00017263	F08F3.6.1	c02
WBGene00017274	F08F8.9a.2	c02
WBGene00017275	F08F8.10a.1	c02
WBGene00017325	F10C1.3.1	c02
WBGene00017353	F10E9.1.1	c02
WBGene00017361	F10E9.12.1	c02
WBGene00017363	F10G2.2.1	c02
WBGene00017365	F10G2.4.1	c02
WBGene00017405	F12E12.4.1	c02
WBGene00017414	F13A2.5a.1	c02
WBGene00017431	F13H6.3.1	c02
WBGene00017452	F14D2.4a.2	c02
WBGene00017460	F14D2.12.1	c02
WBGene00017461	F14D2.13b.1	c02
WBGene00017486	F15E6.5.1	c02
WBGene00017506	F16B4.4.1	c02
WBGene00017579	F18G5.1.1	c02
WBGene00017582	F18G5.6.2	c02
WBGene00017583	F19B10.1.2	c02
WBGene00017593	F19C7.3.1	c02
WBGene00017660	F21C10.11a.1	c02
WBGene00017725	F22H10.1.1	c02
WBGene00017744	F23F1.3.1	c02
WBGene00017752	F23F12.4.1	c02
WBGene00017823	F26D11.6.1	c02
WBGene00017829	F26F4.9a.1	c02
WBGene00017845	F26G5.10.1	c02
WBGene00017911	F29A7.1a.1	c02
WBGene00017912	F29A7.2.1	c02
WBGene00017935	F30B5.6.1	c02
WBGene00017962	F31F4.15a.1	c02
WBGene00018022	F34D6.2.1	c02
WBGene00018134	F37A4.4.1	c02
WBGene00018140	F37B4.10a.1	c02
WBGene00018155	F37C12.14.1	c02
WBGene00018189	F38H12.3a.1	c02
WBGene00018190	F38H12.5.1	c02
WBGene00018195	F39E9.2.1	c02
WBGene00018200	F39E9.11.1	c02
WBGene00018201	F39E9.12.1	c02
WBGene00018223	F40B1.1.1	c02
WBGene00018236	F40F4.1.1	c02
WBGene00018346	F42C5.4a.1	c02
WBGene00018352	F42G2.3.1	c02
WBGene00018404	F44A2.4.1	c02
WBGene00018435	F45C12.4.1	c02
WBGene00018437	F45C12.6.1	c02
WBGene00018438	F45C12.7.1	c02
WBGene00018439	F45C12.8.1	c02
WBGene00018442	F45C12.11a.1	c02
WBGene00018443	F45C12.12.2	c02
WBGene00018452	F45D11.5.1	c02
WBGene00018455	F45D11.9.1	c02
WBGene00018490	F46E10.3.1	c02
WBGene00018561	F47D12.5.1	c02
WBGene00018606	F48E3.6.1	c02
WBGene00018615	F48G7.4.2	c02
WBGene00018628	F49D11.4.1	c02
WBGene00018646	F49F1.6a.1	c02
WBGene00018652	F49F1.12.1	c02
WBGene00018663	F52C6.6.1	c02
WBGene00018665	F52C6.8.1	c02
WBGene00018667	F52C6.10.1	c02
WBGene00018668	F52C6.11.1	c02
WBGene00018683	F52D1.2c.1	c02
WBGene00018684	F52D2.1.1	c02
WBGene00018704	F52E4.8.1	c02
WBGene00018724	F53A9.1.2	c02
WBGene00018746	F53C3.2.1	c02
WBGene00018766	F53G2.1.1	c02
WBGene00018803	F54D10.2.1	c02
WBGene00018810	F54D10.9.1	c02
WBGene00018845	F54H12.5.1	c02
WBGene00018926	F56A11.6.2	c02
WBGene00018939	F56C3.2.1	c02
WBGene00018943	F56C3.6.1	c02
WBGene00018972	F56D6.4.1	c02
WBGene00018973	F56D6.5a.1	c02
WBGene00018978	F56F4.1.1	c02
WBGene00018979	F56F4.2.1	c02
WBGene00019041	F58E1.10.1	c02
WBGene00019042	F58E1.11.1	c02
WBGene00019043	F58E1.12.1	c02
WBGene00019051	F58E2.9.1	c02
WBGene00019057	F58F9.3b.1	c02
WBGene00019058	F58F9.4.1	c02
WBGene00019072	F58H7.7.1	c02
WBGene00019073	F58H7.8.1	c02
WBGene00019090	F59A7.2.1	c02
WBGene00019103	F59D6.1a.1	c02
WBGene00019113	F59E11.7a.1	c02
WBGene00019129	F59G1.8a.2	c02
WBGene00019132	F59H6.1.1	c02
WBGene00019138	F59H6.8.1	c02
WBGene00019139	F59H6.9.1	c02
WBGene00019140	F59H6.10.1	c02
WBGene00019141	F59H6.11.1	c02
WBGene00019142	F59H6.12.1	c02
[truncated: 18,042 more rows]
