# Supplementary material for: Single worm transcriptomics identifies a developmental core network of oscillating genes with deep conservation across nematodes
Source: HighWire-hosted journal article supplement (doi:10.1101/gr.275303.121), 2021-07-22
Supplement: Supplemental_Table_S7.xlsx [file Supplemental_Table_S7.xlsx]

## Sheet: tb_osc_orth_ls1772_fv
Supplemental Table S7 Orthologous oscillatory gene clusters between P. pacificus and C. elegans
PCO, P. pacificus conserved oscillations
PSO, P. pacificus-specific oscillations
CSO, C. elegans-specific oscillations
Orthogroup	WBgene	ppa_locus	Orthologous oscillatory gene cluster
OG0004551	WBGene00016671	PPA06406	cso
OG0008103	WBGene00011757	ppa_stranded_DN283_c0_g1_i1	cso
OG0008118	WBGene00011768	ppa_stranded_DN23455_c1_g1_i1	cso
OG0006260	WBGene00004238	PPA29990	cso
OG0004023	WBGene00016046	ppa_stranded_DN29011_c0_g2_i2	cso
OG0005797	WBGene00009322	ppa_stranded_DN30240_c0_g1_i3	cso
OG0009281	WBGene00194737	ppa_stranded_DN30247_c0_g1_i4	cso
OG0009950	WBGene00022631	Contig16-snapTAU.216	cso
OG0008156	WBGene00011821	PPA21830	cso
OG0007367	WBGene00045481	PPA27373	cso
OG0003869	WBGene00007592	isototal.6788.1	cso
OG0006037	WBGene00009593	PPA07011	cso
OG0008446	WBGene00012122	PPA35477	cso
OG0005587	WBGene00009133	ppa_stranded_DN28644_c1_g1_i3	cso
OG0008041	WBGene00011696	PPA37713	cso
OG0009340	WBGene00013171	PPA01981	cso
OG0008125	WBGene00004091	PPA08866	cso
OG0007873	WBGene00001727	PPA37888	cso
OG0010124	WBGene00006865	PPA07499	cso
OG0003450	WBGene00015294	PPA07020	cso
OG0010216	WBGene00014094	ppa_stranded_DN23928_c0_g1_i2	cso
OG0007162	WBGene00010714	ppa_stranded_DN20838_c0_g1_i1	cso
OG0006045	WBGene00009586	PPA10389	cso
OG0004853	WBGene00017012	ppa_stranded_DN24377_c0_g1_i1	cso
OG0007456	WBGene00019866	PPA45198	cso
OG0009064	WBGene00012755	ppa_stranded_DN28370_c1_g2_i2	cso
OG0007751	WBGene00020149	PPA40115	cso
OG0008824	WBGene00000565	ppa_stranded_DN27802_c0_g1_i2	cso
OG0007104	WBGene00010637	ppa_stranded_DN31546_c2_g7_i2	cso
OG0005666	WBGene00004017	PPA35581	cso
OG0005216	WBGene00008687	PS312_c7221_g1_i2	cso
OG0006391	WBGene00018713	PPA23729	cso
OG0006301	WBGene00000497	PPA39501	cso
OG0006733	WBGene00010267	PPA11927	cso
OG0006233	WBGene00002037	PPA06823	cso
OG0006735	WBGene00010269	PPA35404	cso
OG0008468	WBGene00003786	Iso_D.3487.1	cso
OG0004215	WBGene00006487	PPA08847	cso
OG0008841	WBGene00004231	PPA42316	cso
OG0006138	WBGene00018377	PPA39433	cso
OG0005479	WBGene00017692	PPA20009	cso
OG0004186	WBGene00016242	ppa_stranded_DN31477_c1_g5_i1	cso
OG0004152	WBGene00016201	PPA14480	cso
OG0006672	WBGene00003248	ppa_stranded_DN20133_c0_g1_i1	cso
OG0006492	WBGene00010045	ppa_stranded_DN31595_c4_g1_i1	cso
OG0005878	WBGene00018037	PPA34942	cso
OG0004171	WBGene00007802	Iso_D.10916.2	cso
OG0004334	WBGene00004109	PPA07067	cso
OG0003686	WBGene00004101	ppa_stranded_DN19940_c0_g2_i1	cso
OG0006529	WBGene00003738	ppa_stranded_DN19914_c0_g1_i2	cso
OG0008044	WBGene00020426	PPA21698	cso
OG0003977	WBGene00000995	PPA12810	cso
OG0008933	WBGene00006869	PPA28315	cso
OG0008327	WBGene00020743	PPA40172	cso
OG0009949	WBGene00000376	PPA07265	cso
OG0009683	WBGene00022130	PPA31116	cso
OG0005139	WBGene00003533	PPA10828	cso
OG0006032	WBGene00009573	PPA18740	cso
OG0007833	WBGene00001489	ppa_stranded_DN31433_c3_g7_i3	cso
OG0006105	WBGene00009628	PPA20519	cso
OG0005227	WBGene00000792	PPA08419	cso
OG0004298	WBGene00007916	ppa_stranded_DN30642_c0_g3_i2	cso
OG0005231	WBGene00008711	PPA29744	cso
OG0008492	WBGene00004155	PPA16992	cso
OG0009437	WBGene00021918	PPA02582	cso
OG0003584	WBGene00015480	ppa_stranded_DN11778_c0_g1_i1	cso
OG0010036	WBGene00022665	PPA00383	cso
OG0009898	WBGene00013865	PPA04898	cso
OG0010104	WBGene00022747	PPA31411	cso
OG0005930	WBGene00002036	PPA09539	cso
OG0009790	WBGene00013574	PPA00940	cso
OG0005195	WBGene00008655	ppa_stranded_DN23132_c0_g1_i1	cso
OG0007841	WBGene00011444	PPA09611	cso
OG0004798	WBGene00016951	ppa_stranded_DN29164_c0_g2_i1	cso
OG0005977	WBGene00009528	ppa_stranded_DN26461_c0_g1_i3	cso
OG0004652	WBGene00008215	PPA10263	cso
OG0007723	WBGene00011278	ppa_stranded_DN24091_c0_g1_i1	cso
OG0003779	WBGene00007513	ppa_stranded_DN29992_c1_g3_i2	cso
OG0007690	WBGene00020107	ppa_stranded_DN44499_c0_g1_i1	cso
OG0004208	WBGene00016259	PPA37286	cso
OG0009560	WBGene00013379	PPA04179	cso
OG0010179	WBGene00022790	PPA32171	cso
OG0005760	WBGene00009292	ppa_stranded_DN25771_c0_g1_i1	cso
OG0010022	WBGene00014244	ppa_stranded_DN20846_c0_g1_i1	cso
OG0003989	WBGene00007687	PPA28042	cso
OG0003609	WBGene00007343	PPA33928	cso
OG0008852	WBGene00021252	PPA16049	cso
OG0006771	WBGene00000401	PPA00072	cso
OG0006520	WBGene00018829	PPA16300	cso
OG0007023	WBGene00004764	PPA27306	cso
OG0010073	WBGene00022698	PPA36618	cso
OG0004610	WBGene00008146	ppa_stranded_DN25977_c0_g1_i2	cso
OG0007166	WBGene00019545	PPA06079	cso
OG0007922	WBGene00011524	ppa_stranded_DN26653_c0_g1_i1	cso
OG0006218	WBGene00009741	ppa_stranded_DN30191_c1_g1_i1	cso
OG0007136	WBGene00010667	PPA33095	cso
OG0003638	WBGene00007374	PPA23358	cso
OG0007863	WBGene00020248	PPA35590	cso
OG0006303	WBGene00018591	PPA03062	cso
OG0005225	WBGene00003623	PPA23688	cso
OG0006133	WBGene00009649	PPA20001	cso
OG0009216	WBGene00012980	PPA28235	cso
OG0006012	WBGene00003532	PPA42327	cso
OG0005599	WBGene00009144	PPA22873	cso
OG0007458	WBGene00019868	PPA39444	cso
OG0006194	WBGene00018467	PPA18829	cso
OG0005320	WBGene00008832	PPA26353	cso
OG0003318	WBGene00007146	ppa_stranded_DN28769_c0_g1_i2	cso
OG0004264	WBGene00006444	PPA28285	cso
OG0004088	WBGene00003552	PPA12005	cso
OG0006951	WBGene00003089	PPA21302	cso
OG0007934	WBGene00011551	PPA32219	cso
OG0006633	WBGene00018976	PPA18277	cso
OG0008577	WBGene00012260	PPA39726	cso
OG0003608	WBGene00001564	ppa_stranded_DN29351_c0_g1_i3	cso
OG0008338	WBGene00004301	ppa_stranded_DN12376_c0_g2_i1	cso
OG0006918	WBGene00010454	ppa_stranded_DN26444_c0_g2_i1	cso
OG0006251	WBGene00002203	PPA27136	cso
OG0003636	WBGene00007372	ppa_stranded_DN29466_c0_g1_i1	cso
OG0004814	WBGene00016962	PPA39963	cso
OG0005345	WBGene00008876	ppa_stranded_DN16620_c0_g1_i1	cso
OG0005228	WBGene00017380	PPA08444	cso
OG0006077	WBGene00009625	PPA18848	cso
OG0007355	WBGene00000894	PPA28118	cso
OG0009343	WBGene00004234	PPA28202	cso
OG0004491	WBGene00008076	PPA02161	cso
OG0009096	WBGene00006568	ppa_stranded_DN31566_c0_g1_i1	cso
OG0006575	WBGene00010111	ppa_stranded_DN26773_c0_g1_i6	cso
OG0006336	WBGene00003150	ppa_stranded_DN31396_c3_g3_i11	cso
OG0007281	WBGene00001063	ppa_stranded_DN30975_c0_g1_i5	cso
OG0009084	WBGene00012777	PPA30813	cso
OG0004246	WBGene00004771	PPA39584	cso
OG0009109	WBGene00012813	ppa_stranded_DN28643_c1_g1_i6	cso
OG0003494	WBGene00015323	PPA23692	cso
OG0009710	WBGene00022180	PPA14451	cso
OG0003296	WBGene00002252	ppa_stranded_DN28433_c0_g1_i4	cso
OG0006753	WBGene00019067	PPA06205	cso
OG0004216	WBGene00007823	PPA40343	cso
OG0004203	WBGene00016265	PPA09715	cso
OG0003794	WBGene00015691	Iso_D.13278.1	cso
OG0005934	WBGene00009482	ppa_stranded_DN28691_c0_g2_i2	cso
OG0005393	WBGene00003981	ppa_stranded_DN25060_c0_g1_i2	cso
OG0005498	WBGene00017724	ppa_stranded_DN19775_c0_g1_i1	cso
OG0007559	WBGene00011147	PPA39785	cso
OG0005444	WBGene00017659	PPA28348	cso
OG0005557	WBGene00017781	PPA14253	cso
OG0007637	WBGene00020017	PPA16981	cso
OG0009024	WBGene00012699	PPA13000	cso
OG0005718	WBGene00017923	PPA38667	cso
OG0008337	WBGene00020766	PPA28683	cso
OG0008628	WBGene00012339	ppa_stranded_DN24910_c0_g1_i2	cso
OG0010110	WBGene00000425	PPA39815	cso
OG0004310	WBGene00003527	PPA42532	cso
OG0003898	WBGene00003778	ppa_stranded_DN26130_c1_g1_i4	cso
OG0004577	WBGene00016735	PPA12029	cso
OG0003676	WBGene00003526	ppa_stranded_DN25261_c0_g1_i2	cso
OG0007297	WBGene00019718	PPA40338	cso
OG0006334	WBGene00018641	PPA22037	cso
OG0009325	WBGene00001623	PPA22337	cso
OG0007299	WBGene00019721	PPA40340	cso
OG0004319	WBGene00007935	PPA20191	cso
OG0006417	WBGene00018742	PPA39441	cso
OG0008335	WBGene00020764	PPA17724	cso
OG0008985	WBGene00077669	PPA39018	cso
OG0007218	WBGene00019636	PPA36621	cso
OG0007535	WBGene00011112	PPA19879	cso
OG0004005	WBGene00001193	PPA07856	cso
OG0008881	WBGene00012531	ppa_stranded_DN24848_c0_g2_i1	cso
OG0004321	WBGene00007934	PPA23763	cso
OG0005805	WBGene00009326	PPA15149	cso
OG0004711	WBGene00006680	ppa_stranded_DN32784_c0_g1_i1	cso
OG0009443	WBGene00021927	ppa_stranded_DN28346_c2_g1_i2	cso
OG0009737	WBGene00022231	ppa_stranded_DN27783_c0_g1_i1	cso
OG0007677	WBGene00002218	PPA37482	cso
OG0005860	WBGene00003033	PPA24659	cso
OG0008970	WBGene00003144	ppa_stranded_DN28966_c0_g1_i1	cso
OG0003300	WBGene00002207	ppa_stranded_DN28938_c1_g1_i1	cso
OG0007186	WBGene00019603	PPA37884	cso
OG0005824	WBGene00006532	PPA01431	cso
OG0007432	WBGene00010977	ppa_stranded_DN27000_c0_g1_i2	cso
OG0006448	WBGene00004328	PPA18070	cso
OG0006548	WBGene00004131	PPA05754	cso
OG0005932	WBGene00018090	PPA18064	cso
OG0004370	WBGene00016468	ppa_stranded_DN23357_c0_g1_i1	cso
OG0008212	WBGene00020634	PPA43683	cso
OG0005566	WBGene00003816	PPA14211	cso
OG0006358	WBGene00009916	PPA11090	cso
OG0008975	WBGene00012610	PPA18732	cso
OG0003213	WBGene00007067	PPA29741	cso
OG0008242	WBGene00045177	Iso_D.11220.1	cso
OG0007233	WBGene00003844	PPA42124	cso
OG0006990	WBGene00001441	PPA29963	cso
OG0006291	WBGene00018569	PPA21673	cso
OG0007546	WBGene00011136	ppa_stranded_DN25621_c0_g3_i1	cso
OG0009063	WBGene00000793	PPA24672	cso
OG0004009	WBGene00006611	PPA24566	cso
OG0009191	WBGene00021645	ppa_stranded_DN16448_c0_g2_i1	cso
OG0008119	WBGene00020504	PPA06835	cso
OG0003758	WBGene00002043	PPA04155	cso
OG0003656	WBGene00007384	PPA07156	cso
OG0003663	WBGene00007395	PPA16907	cso
OG0005761	WBGene00006622	Contig146-snap.29	cso
OG0006224	WBGene00004183	PPA19839	cso
OG0010002	WBGene00022861	PPA06943	cso
OG0005775	WBGene00017965	PPA22055	cso
OG0003657	WBGene00003876	PPA03292	cso
OG0009773	WBGene00004037	ppa_stranded_DN21866_c0_g1_i1	cso
OG0008483	WBGene00012168	PPA37387	cso
OG0006863	WBGene00004892	ppa_stranded_DN28369_c0_g1_i3	cso
OG0006339	WBGene00009897	ppa_stranded_DN33073_c0_g1_i1	cso
OG0006658	WBGene00010188	ppa_stranded_DN28151_c0_g1_i1	cso
OG0005073	WBGene00006923	ppa_stranded_DN29868_c2_g3_i3	cso
OG0008374	WBGene00020806	PPA17007	cso
OG0009655	WBGene00013496	ppa_stranded_DN26672_c0_g1_i2	cso
OG0008311	WBGene00003545	PPA37581	cso
OG0005766	WBGene00017950	ppa_stranded_DN18413_c0_g1_i1	cso
OG0005374	WBGene00017547	PPA32883	cso
OG0009781	WBGene00013541	ppa_stranded_DN32601_c0_g1_i1	cso
OG0009782	WBGene00013542	PPA39141	cso
OG0006982	WBGene00019352	ppa_stranded_DN27368_c0_g2_i1	cso
OG0009458	WBGene00021941	PPA11637	cso
OG0004774	WBGene00008320	PPA44653	cso
OG0004057	WBGene00007722	ppa_stranded_DN8840_c0_g1_i1	cso
OG0006129	WBGene00018374	PPA00427	cso
OG0010017	WBGene00044396	PPA38588	cso
OG0003499	WBGene00007262	PPA15876	cso
OG0005325	WBGene00017478	ppa_stranded_DN26305_c0_g1_i1	cso
OG0005567	WBGene00017798	PPA14210	cso
OG0006999	WBGene00019365	PPA08680	cso
OG0009293	WBGene00013082	PPA28923	cso
OG0007199	WBGene00001715	ppa_stranded_DN16622_c0_g1_i1	cso
OG0004709	WBGene00016866	PPA03840	cso
OG0004447	WBGene00006832	PPA10323	cso
OG0007809	WBGene00011404	PPA28884	cso
OG0003421	WBGene00006599	PPA08988	cso
OG0007516	WBGene00011081	PPA08660	cso
OG0006191	WBGene00018462	ppa_stranded_DN7593_c0_g1_i1	cso
OG0003998	WBGene00016005	ppa_stranded_DN28010_c0_g2_i1	cso
OG0006262	WBGene00018514	ppa_stranded_DN25276_c0_g1_i1	cso
OG0006944	WBGene00010497	ppa_stranded_DN23298_c0_g1_i1	cso
OG0004461	WBGene00008064	ppa_stranded_DN7815_c0_g1_i1	cso
OG0007515	WBGene00001608	PPA33099	cso
OG0005871	WBGene00009403	ppa_stranded_DN17384_c0_g1_i1	cso
OG0004055	WBGene00003710	ppa_stranded_DN30487_c0_g1_i4	cso
OG0003557	WBGene00007302	PPA03923	cso
OG0007445	WBGene00010987	PPA36231	cso
OG0006239	WBGene00000438	PPA07038	cso
OG0007967	WBGene00020319	PPA36113	cso
OG0006023	WBGene00018219	PPA33015	cso
OG0009184	WBGene00021629	ppa_stranded_DN23500_c0_g1_i1	cso
OG0007604	WBGene00011227	PPA39357	cso
OG0009793	WBGene00013578	PPA17939	cso
OG0009999	WBGene00014233	ppa_stranded_DN28597_c0_g2_i4	cso
OG0008331	WBGene00006591	PPA37604	cso
OG0004222	WBGene00007849	PPA31678	cso
OG0003448	WBGene00006467	ppa_stranded_DN27347_c0_g1_i2	cso
OG0007964	WBGene00020321	PPA09621	cso
OG0007011	WBGene00019382	ppa_stranded_DN24176_c0_g1_i2	cso
OG0009088	WBGene00021531	PPA08270	cso
OG0006802	WBGene00010348	ppa_stranded_DN27246_c0_g3_i1	cso
OG0003411	WBGene00015231	ppa_stranded_DN20880_c0_g1_i2	cso
OG0007194	WBGene00019615	PPA23949	cso
OG0006207	WBGene00003520	ppa_stranded_DN27474_c0_g1_i2	cso
OG0007621	WBGene00000984	PPA18182	cso
OG0007921	WBGene00011523	PPA25311	cso
OG0005248	WBGene00006575	ppa_stranded_DN30471_c0_g1_i1	cso
OG0006538	WBGene00010082	PPA20485	cso
OG0004322	WBGene00016415	PPA24977	cso
OG0005710	WBGene00009241	PPA16929	cso
OG0006471	WBGene00018787	PPA26007	cso
OG0006434	WBGene00009978	PPA03897	cso
OG0005865	WBGene00000033	PPA24985	cso
OG0007857	WBGene00000516	PPA39952	cso
OG0009751	WBGene00004169	PPA26869	cso
OG0006606	WBGene00004350	ppa_stranded_DN29474_c0_g2_i7	cso
OG0004962	WBGene00008450	PPA24024	cso
OG0009697	WBGene00044348	ppa_stranded_DN30384_c0_g2_i4	cso
OG0003640	WBGene00015519	ppa_stranded_DN25602_c0_g1_i1	cso
OG0004939	WBGene00005019	PPA19343	cso
OG0009538	WBGene00021984	PPA21295	cso
OG0004762	WBGene00008303	ppa_stranded_DN21689_c0_g2_i2	cso
OG0005734	WBGene00001345	PPA12837	cso
OG0003229	WBGene00000723	ppa_stranded_DN25903_c0_g2_i1	cso
OG0006088	WBGene00003593	ppa_stranded_DN29398_c0_g1_i2	cso
OG0010093	WBGene00022743	PPA23415	cso
OG0004142	WBGene00003590	ppa_stranded_DN23711_c0_g2_i2	cso
OG0004944	WBGene00008435	PPA39511	cso
OG0008803	WBGene00022474	PPA32640	cso
OG0009952	WBGene00000441	PPA28710	cso
OG0005321	WBGene00000562	ppa_stranded_DN48430_c0_g1_i1	cso
OG0005862	WBGene00018023	PPA23400	cso
OG0009835	WBGene00022358	ppa_stranded_DN30799_c2_g1_i4	cso
OG0008640	WBGene00000035	PPA15738	cso
OG0007478	WBGene00011030	PPA31199	cso
OG0007778	WBGene00020160	ppa_stranded_DN26892_c0_g1_i4	cso
OG0007760	WBGene00011335	PPA35535	cso
OG0007589	WBGene00007010	PPA15237	cso
OG0003364	WBGene00000895	ppa_stranded_DN28818_c0_g1_i1	cso
OG0007413	WBGene00000051	PPA03844	cso
OG0008442	WBGene00020891	PPA22915	cso
OG0008855	WBGene00004894	ppa_stranded_DN29149_c0_g1_i4	cso
OG0007226	WBGene00010765	ppa_stranded_DN21348_c0_g1_i1	cso
OG0005729	WBGene00006667	ppa_stranded_DN16596_c0_g2_i1	cso
OG0006652	WBGene00001403	ppa_stranded_DN27713_c0_g3_i6	cso
OG0010183	WBGene00022797	PPA38689	cso
OG0005484	WBGene00017698	ppa_stranded_DN16317_c0_g1_i1	cso
OG0006555	WBGene00018859	ppa_stranded_DN23718_c0_g2_i1	cso
OG0004240	WBGene00016314	UMM-S387-0.13-mRNA-1_frag	cso
OG0004382	WBGene00007984	PPA16597	cso
OG0003223	WBGene00000138	PPA12825	cso
OG0006577	WBGene00018886	PPA20344	cso
OG0004032	WBGene00016067	ppa_stranded_DN24360_c0_g1_i1	cso
OG0007129	WBGene00010661	ppa_stranded_DN26005_c0_g2_i2	cso
OG0007157	WBGene00010700	ppa_stranded_DN24905_c0_g1_i2	cso
OG0008593	WBGene00021048	ppa_stranded_DN29081_c0_g1_i3	cso
OG0007842	WBGene00011445	PPA06926	cso
OG0009934	WBGene00013902	ppa_stranded_DN30012_c0_g1_i2	cso
OG0003234	WBGene00015002	ppa_stranded_DN25472_c0_g2_i2	cso
OG0006739	WBGene00019064	ppa_stranded_DN31454_c7_g1_i1	cso
OG0007292	WBGene00010813	ppa_stranded_DN29354_c0_g1_i1	cso
OG0004295	WBGene00007923	PPA00969	cso
OG0008291	WBGene00044553	PPA12916	cso
OG0006042	WBGene00004096	ppa_stranded_DN23265_c0_g2_i1	cso
OG0006202	WBGene00018470	ppa_stranded_DN25490_c1_g1_i3	cso
OG0007839	WBGene00011440	PPA13103	cso
OG0005994	WBGene00044556	PPA27905	cso
OG0004909	WBGene00008421	PPA05552	cso
OG0004225	WBGene00016292	ppa_stranded_DN28196_c0_g2_i4	cso
OG0005589	WBGene00001496	PPA16918	cso
OG0005891	WBGene00009439	PPA09017	cso
OG0009643	WBGene00022078	PPA23994	cso
OG0004747	WBGene00008284	PPA06730	cso
OG0005366	WBGene00000068	ppa_stranded_DN29651_c0_g1_i1	cso
OG0010001	WBGene00006876	PPA08268	cso
OG0004854	WBGene00017013	PPA20109	cso
OG0009644	WBGene00013477	ppa_stranded_DN23819_c0_g2_i1	cso
OG0005114	WBGene00008606	PPA33555	cso
OG0005111	WBGene00008599	PPA17524	cso
OG0009027	WBGene00012669	PPA28922	cso
OG0007099	WBGene00019489	PPA07969	cso
OG0004393	WBGene00016499	PPA15853	cso
OG0005145	WBGene00017306	PPA29080	cso
OG0007085	WBGene00004227	PPA04742	cso
OG0006566	WBGene00006677	ppa_stranded_DN27567_c0_g1_i2	cso
OG0007335	WBGene00010867	PPA12544	cso
OG0006714	WBGene00003549	PPA00381	cso
OG0009180	WBGene00004735	PPA37968	cso
OG0003914	WBGene00007048	ppa_stranded_DN25749_c1_g2_i1	cso
OG0009499	WBGene00013292	ppa_stranded_DN25333_c0_g2_i2	cso
OG0009030	WBGene00000022	PPA40642	cso
OG0009127	WBGene00012869	PPA38718	cso
OG0006731	WBGene00019060	ppa_stranded_DN26828_c0_g1_i1	cso
OG0003633	WBGene00001615	PPA08181	cso
OG0005463	WBGene00009023	PPA38395	cso
OG0007203	WBGene00010732	ppa_stranded_DN27586_c0_g1_i1	cso
OG0006178	WBGene00009700	ppa_stranded_DN7659_c0_g1_i1	cso
OG0008650	WBGene00012360	ppa_stranded_DN31477_c0_g1_i1	cso
OG0005127	WBGene00017297	PPA17714	cso
OG0004429	WBGene00008032	PPA05927	cso
OG0006029	WBGene00004950	ppa_stranded_DN24574_c0_g2_i1	cso
OG0004651	WBGene00008214	PPA10262	cso
OG0007336	WBGene00010868	PPA09407	cso
OG0010125	WBGene00022767	PPA07503	cso
OG0005288	WBGene00001136	PPA35680	cso
OG0004808	WBGene00000302	PPA02067	cso
OG0009774	WBGene00022284	PPA28931	cso
OG0006149	WBGene00009657	PPA40268	cso
OG0009972	WBGene00002299	ppa_stranded_DN27916_c0_g1_i4	cso
OG0003999	WBGene00016006	PPA00164	cso
OG0008463	WBGene00012137	PPA06722	cso
OG0005303	WBGene00017448	Iso_D.14978.2	cso
OG0003384	WBGene00000268	PPA11308	cso
OG0008319	WBGene00000934	PPA09932	cso
OG0007840	WBGene00011443	ppa_stranded_DN18452_c0_g1_i1	cso
OG0005354	WBGene00017513	PPA38492	cso
OG0003315	WBGene00007143	PPA32778	cso
OG0005736	WBGene00000980	PPA31225	cso
OG0004582	WBGene00004003	ppa_stranded_DN31379_c1_g2_i1	cso
OG0005092	WBGene00002195	ppa_stranded_DN18732_c0_g2_i1	cso
OG0003568	WBGene00004083	PPA03908	cso
OG0009780	WBGene00013540	ppa_stranded_DN25900_c0_g1_i1	cso
OG0008797	WBGene00001629	isopolya.1164.1	cso
OG0009296	WBGene00013088	PPA20508	cso
OG0006085	WBGene00018318	ppa_stranded_DN28061_c0_g1_i1	cso
OG0009598	WBGene00013448	ppa_stranded_DN29138_c0_g1_i2	cso
OG0009541	WBGene00021994	PPA11593	cso
OG0006958	WBGene00019317	ppa_stranded_DN43838_c0_g1_i1	cso
OG0005418	WBGene00008969	PPA17277	cso
OG0007593	WBGene00003423	PPA25469	cso
OG0010118	WBGene00006602	PPA18746	cso
OG0007169	WBGene00003943	PPA00447	cso
OG0003813	WBGene00004405	ppa_stranded_DN479_c0_g2_i1	cso
OG0005020	WBGene00017160	PPA36836	cso
OG0003345	WBGene00007054	PPA24079	cso
OG0007202	WBGene00010731	PPA30708	cso
OG0008241	WBGene00020651	PPA32311	cso
OG0004205	WBGene00007817	PPA16609	cso
OG0009760	WBGene00003604	ppa_stranded_DN29624_c0_g1_i3	cso
OG0007018	WBGene00003551	ppa_stranded_DN25689_c0_g1_i2	cso
OG0004381	WBGene00007983	ppa_stranded_DN29585_c0_g1_i10	cso
OG0009822	WBGene00013602	PPA16534	cso
OG0008960	WBGene00021396	ppa_stranded_DN30589_c0_g1_i3	cso
OG0003272	WBGene00004359	ppa_stranded_DN27727_c0_g2_i4	cso
OG0007669	WBGene00004857	PPA30782	cso
OG0004751	WBGene00016911	PPA23837	cso
OG0008567	WBGene00002133	PPA26636	cso
OG0005496	WBGene00002125	PPA06850	cso
OG0006270	WBGene00004356	PPA18834	cso
OG0007215	WBGene00010742	PPA29258	cso
OG0004546	WBGene00016663	ppa_stranded_DN17677_c0_g1_i1	cso
OG0004540	WBGene00000981	PPA43117	cso
OG0004908	WBGene00000084	PPA40291	cso
OG0004202	WBGene00016264	PPA07451	cso
OG0006653	WBGene00010175	ppa_stranded_DN27577_c0_g2_i2	cso
OG0008255	WBGene00020678	PPA11515	cso
OG0005882	WBGene00018044	PPA36494	cso
OG0003654	WBGene00000542	ppa_stranded_DN31147_c2_g1_i3	cso
OG0003419	WBGene00007200	ppa_stranded_DN21700_c0_g1_i2	cso
OG0009576	WBGene00013418	PPA11610	cso
OG0003823	WBGene00007548	PPA00019	cso
OG0004472	WBGene00016594	PPA33828	cso
OG0003570	WBGene00007330	ppa_stranded_DN31066_c0_g3_i2	cso
OG0007656	WBGene00011257	PPA34216	cso
OG0009350	WBGene00021808	ppa_stranded_DN27772_c1_g1_i2	cso
OG0009319	WBGene00013127	PPA22979	cso
OG0005905	WBGene00006914	PPA42533	cso
OG0008230	WBGene00011880	PPA00096	cso
OG0007373	WBGene00010888	PPA38767	cso
OG0008087	WBGene00004902	PPA39962	cso
OG0006812	WBGene00194747	PPA16211	cso
OG0008181	WBGene00011839	PPA12567	cso
OG0008310	WBGene00020740	PPA07402	cso
OG0003266	WBGene00015056	PPA14224	cso
OG0006585	WBGene00018907	PPA42643	cso
OG0005240	WBGene00017398	PPA39382	cso
OG0008421	WBGene00000528	PPA39095	cso
OG0004972	WBGene00003618	ppa_stranded_DN30392_c0_g1_i4	cso
OG0008153	WBGene00003936	PPA17842	cso
OG0006497	WBGene00001796	PPA01260	cso
OG0009611	WBGene00013458	ppa_stranded_DN20585_c0_g1_i1	cso
OG0004332	WBGene00016419	PPA25669	cso
OG0005425	WBGene00008978	Contig63-snapTAU.92	cso
OG0004418	WBGene00008021	PPA00122	cso
OG0009641	WBGene00004878	ppa_stranded_DN31670_c1_g1_i3	cso
OG0003665	WBGene00001821	PPA19587	cso
OG0010197	WBGene00022817	PPA11135	cso
OG0005389	WBGene00017569	PPA03012	cso
OG0005061	WBGene00000003	PPA06723	cso
OG0008505	WBGene00044280	ppa_stranded_DN5645_c0_g1_i1	cso
OG0008687	WBGene00013639	PPA19756	cso
OG0006772	WBGene00004776	PPA38517	cso
OG0009413	WBGene00003008	ppa_stranded_DN20485_c0_g1_i2	cso
OG0008094	WBGene00000245	ppa_stranded_DN9179_c0_g1_i1	cso
OG0006282	WBGene00018538	ppa_stranded_DN29247_c0_g1_i1	cso
OG0004797	WBGene00000006	PPA07769	cso
OG0003722	WBGene00007474	PPA40112	cso
OG0006579	WBGene00010117	PPA00064	cso
OG0006742	WBGene00003627	ppa_stranded_DN30570_c6_g3_i1	cso
OG0004994	WBGene00017126	ppa_stranded_DN23304_c0_g1_i2	cso
OG0008195	WBGene00011849	PPA18374	cso
OG0008922	WBGene00006762	PPA24743	cso
OG0008959	WBGene00021395	PPA17151	cso
OG0007754	WBGene00011328	PPA06367	cso
OG0009358	WBGene00013180	PPA32660	cso
OG0006200	WBGene00018473	PPA14869	cso
OG0007380	WBGene00010897	ppa_stranded_DN30655_c0_g1_i1	cso
OG0004590	WBGene00004196	ppa_stranded_DN20073_c0_g1_i5	cso
OG0005875	WBGene00009400	PPA07415	cso
OG0006851	WBGene00002915	PPA17835	cso
OG0004407	WBGene00016513	PPA32674	cso
OG0009459	WBGene00021943	ppa_stranded_DN27734_c1_g1_i1	cso
OG0006161	WBGene00018403	PPA14240	cso
OG0005123	WBGene00008610	PPA35793	cso
OG0006956	WBGene00019298	PPA07244	cso
OG0006137	WBGene00018376	PPA18690	cso
OG0008472	WBGene00012149	PPA04733	cso
OG0003354	WBGene00003729	PPA17759	cso
OG0006268	WBGene00018522	PPA17695	cso
OG0003311	WBGene00015138	ppa_stranded_DN20232_c0_g1_i1	cso
OG0008420	WBGene00012085	ppa_stranded_DN19680_c0_g2_i1	cso
OG0006280	WBGene00018532	PPA38409	cso
OG0009224	WBGene00012987	PPA22753	cso
OG0004033	WBGene00006861	ppa_stranded_DN23918_c0_g1_i1	cso
OG0008854	WBGene00021245	ppa_stranded_DN43884_c0_g1_i1	cso
OG0006293	WBGene00018576	ppa_stranded_DN28559_c0_g3_i2	cso
OG0007211	WBGene00019633	PPA36610	cso
OG0006252	WBGene00009789	PPA15873	cso
OG0008193	WBGene00044500	PPA13751	cso
OG0008360	WBGene00012007	PPA29371	cso
OG0003792	WBGene00003567	PPA42174	cso
OG0009015	WBGene00006696	PPA18266	cso
OG0005798	WBGene00009323	Iso_D.11569.1	cso
OG0003228	WBGene00007103	PPA14135	cso
OG0004983	WBGene00001983	ppa_stranded_DN28774_c0_g3_i3	cso
OG0005988	WBGene00018184	ppa_stranded_DN20196_c0_g1_i1	cso
OG0006700	WBGene00010225	PPA04714	cso
OG0005126	WBGene00000988	PPA17456	cso
OG0007386	WBGene00019780	PPA35057	cso
OG0005166	WBGene00002053	ppa_stranded_DN25104_c0_g1_i1	cso
OG0009873	WBGene00003568	PPA40416	cso
OG0006335	WBGene00006424	PPA19589	cso
OG0006221	WBGene00003233	ppa_stranded_DN30024_c1_g1_i3	cso
OG0009749	WBGene00044350	PPA19509	cso
OG0009292	WBGene00013080	PPA09222	cso
OG0006111	WBGene00009642	PPA30719	cso
OG0004733	WBGene00004370	PPA06859	cso
OG0006398	WBGene00009947	ppa_stranded_DN8334_c0_g1_i1	cso
OG0008268	WBGene00011923	PPA13681	cso
OG0007577	WBGene00011293	PPA32564	cso
OG0008977	WBGene00021415	ppa_stranded_DN9401_c0_g1_i1	cso
OG0003683	WBGene00006620	ppa_stranded_DN30105_c0_g1_i1	cso
OG0008412	WBGene00012073	PPA23670	cso
OG0004343	WBGene00016438	ppa_stranded_DN31370_c1_g2_i4	cso
OG0005179	WBGene00017338	UMM-S2857-5.15-mRNA-1_frag	cso
OG0006723	WBGene00010251	PPA41982	cso
OG0006979	WBGene00000176	ppa_stranded_DN27109_c0_g1_i1	cso
OG0004170	WBGene00007801	PPA32371	cso
OG0010097	WBGene00013975	Iso_D.3328.1	cso
OG0007672	WBGene00014826	PPA07495	cso
OG0007390	WBGene00000246	PPA05928	cso
OG0004760	WBGene00016914	PPA38535	cso
OG0003449	WBGene00000523	ppa_stranded_DN23048_c0_g1_i1	cso
OG0009383	WBGene00013189	ppa_stranded_DN31025_c2_g5_i1	cso
OG0010217	WBGene00014095	ppa_stranded_DN31406_c4_g5_i1	cso
OG0006565	WBGene00044791	ppa_stranded_DN11333_c0_g2_i1	cso
OG0005914	WBGene00009450	PPA25352	cso
OG0003490	WBGene00015326	PPA01555	cso
OG0004523	WBGene00016657	Iso_D.6422.1	cso
OG0006355	WBGene00018657	PPA34619	cso
OG0007053	WBGene00010595	ppa_stranded_DN20263_c0_g1_i1	cso
OG0006882	WBGene00003019	ppa_stranded_DN30368_c0_g1_i1	cso
OG0004410	WBGene00000225	PPA23380	cso
OG0003668	WBGene00043994	PPA21402	cso
OG0003451	WBGene00000526	ppa_stranded_DN17404_c0_g1_i1	cso
OG0006621	WBGene00000112	PPA38819	cso
OG0005262	WBGene00017428	PPA34843	cso
OG0005181	WBGene00017340	ppa_stranded_DN20645_c0_g1_i2	cso
OG0007733	WBGene00020139	ppa_stranded_DN19789_c0_g1_i3	cso
OG0005023	WBGene00000115	ppa_stranded_DN23807_c0_g2_i1	cso
OG0003746	WBGene00007482	PPA09780	cso
OG0005562	WBGene00001592	PPA35955	cso
OG0003812	WBGene00001620	ppa_stranded_DN25158_c0_g1_i3	cso
OG0004083	WBGene00016131	ppa_stranded_DN23081_c0_g1_i1	cso
OG0005219	WBGene00008669	ppa_stranded_DN44425_c0_g1_i1	cso
OG0009138	WBGene00012861	PPA40201	cso
OG0007412	WBGene00000282	PPA17437	cso
OG0006343	WBGene00009886	PPA42319	cso
OG0008973	WBGene00000870	PPA39153	cso
OG0009037	WBGene00021452	PPA21016	cso
OG0010195	WBGene00002134	PPA09283	cso
OG0008248	WBGene00020658	PPA34357	cso
OG0009323	WBGene00013136	PPA06503	cso
OG0009832	WBGene00002135	PPA09281	cso
OG0005306	WBGene00017464	PPA33970	cso
OG0009825	WBGene00044260	PPA35710	cso
OG0005157	WBGene00007056	PPA37069	cso
OG0007082	WBGene00019464	PPA18091	cso
OG0008187	WBGene00020569	ppa_stranded_DN45427_c0_g1_i1	cso
OG0006158	WBGene00000777	ppa_stranded_DN4239_c0_g2_i1	cso
OG0007454	WBGene00019855	ppa_stranded_DN27415_c0_g1_i5	cso
OG0005012	WBGene00006642	PPA06849	cso
OG0009809	WBGene00004236	ppa_stranded_DN28089_c1_g1_i3	cso
OG0005613	WBGene00001439	ppa_stranded_DN25328_c0_g1_i2	cso
OG0005895	WBGene00003112	PPA30611	cso
OG0007398	WBGene00003915	PPA15366	cso
OG0004241	WBGene00016315	PPA45373	cso
OG0007879	WBGene00011480	PPA16770	cso
OG0007427	WBGene00019819	PPA17258	cso
OG0005464	WBGene00003410	PPA17668	cso
OG0005819	WBGene00009340	PPA26482	cso
OG0006418	WBGene00018743	PPA18768	cso
OG0007798	WBGene00011394	PPA31457	cso
OG0004006	WBGene00016018	PPA08198	cso
OG0003849	WBGene00015752	PPA02503	cso
OG0003563	WBGene00000990	PPA19559	cso
OG0006823	WBGene00010370	ppa_stranded_DN26586_c0_g2_i2	cso
OG0007804	WBGene00011398	PPA11874	cso
OG0008254	WBGene00002248	ppa_stranded_DN29814_c0_g1_i3	cso
OG0009199	WBGene00000415	ppa_stranded_DN30584_c1_g1_i8	cso
OG0003340	WBGene00015163	PPA02509	cso
OG0009177	WBGene00012941	PPA19957	cso
OG0009195	WBGene00021637	PPA35527	cso
OG0007476	WBGene00019882	PPA40085	cso
OG0006893	WBGene00019268	ppa_stranded_DN33061_c0_g1_i1	cso
OG0005085	WBGene00000083	ppa_stranded_DN30466_c0_g2_i3	cso
OG0006611	WBGene00018957	PPA10660	cso
OG0008816	WBGene00003681	PPA06963	cso
OG0006850	WBGene00019211	PPA18665	cso
OG0005904	WBGene00018069	ppa_stranded_DN11146_c0_g2_i1	cso
OG0005617	WBGene00009157	ppa_stranded_DN16987_c0_g1_i1	cso
OG0007259	WBGene00023432	PPA41864	cso
OG0008856	WBGene00021247	ppa_stranded_DN29487_c0_g2_i1	cso
OG0009438	WBGene00021919	ppa_stranded_DN39876_c0_g1_i1	cso
OG0004680	WBGene00016817	PPA12483	cso
OG0009089	WBGene00021533	PPA42968	cso
OG0007569	WBGene00004140	PPA13526	cso
OG0010069	WBGene00013969	ppa_stranded_DN30361_c0_g2_i2	cso
OG0006891	WBGene00001631	PPA15255	cso
OG0004261	WBGene00007882	PPA11639	cso
OG0005551	WBGene00009108	ppa_stranded_DN23965_c0_g1_i2	cso
OG0008631	WBGene00001395	PPA40478	cso
OG0003269	WBGene00015074	PPA16997	cso
OG0006761	WBGene00019074	ppa_stranded_DN27618_c0_g2_i3	cso
OG0007712	WBGene00020128	PPA17558	cso
OG0006136	WBGene00018375	ppa_stranded_DN9668_c0_g1_i1	cso
OG0003407	WBGene00001432	ppa_stranded_DN18102_c0_g1_i1	cso
OG0006852	WBGene00019212	PPA43498	cso
OG0005368	WBGene00004311	ppa_stranded_DN16924_c0_g1_i1	cso
OG0004974	WBGene00000952	PPA00157	cso
OG0008201	WBGene00011850	ppa_stranded_DN23485_c0_g1_i1	cso
OG0006599	WBGene00185001	PPA32720	cso
OG0009376	WBGene00003387	UMM-S435-2.111-mRNA-1_frag_3	cso
OG0007253	WBGene00010780	PPA25400	cso
OG0008652	WBGene00012363	PPA08483	cso
OG0005948	WBGene00009503	PPA24857	cso
OG0008479	WBGene00007024	PPA35651	cso
OG0009786	WBGene00001636	ppa_stranded_DN25668_c0_g1_i1	cso
OG0005868	WBGene00000983	PPA01862	cso
OG0004820	WBGene00006522	ppa_stranded_DN25337_c0_g1_i2	cso
OG0004221	WBGene00007848	ppa_stranded_DN16353_c0_g2_i1	cso
OG0008081	WBGene00011738	PPA07263	cso
OG0007395	WBGene00010902	PPA22439	cso
OG0003934	WBGene00004395	ppa_stranded_DN31108_c1_g1_i3	cso
OG0005086	WBGene00017241	ppa_stranded_DN24311_c0_g2_i1	cso
OG0005757	WBGene00009288	ppa_stranded_DN24744_c2_g1_i1	cso
OG0006886	WBGene00010425	PPA14245	cso
OG0004864	WBGene00001501	PPA27825	cso
OG0008539	WBGene00003015	PPA19410	cso
OG0005627	WBGene00023504	PPA01961	cso
OG0009273	WBGene00021159	PPA17160	cso
OG0006323	WBGene00009849	ppa_stranded_DN26285_c0_g1_i1	cso
OG0008717	WBGene00013693	PPA02486	cso
OG0003888	WBGene00015795	PPA28296	cso
OG0004135	WBGene00016172	PPA22782	cso
OG0005555	WBGene00003847	PPA04978	cso
OG0005269	WBGene00008743	PPA04735	cso
OG0007074	WBGene00010621	PPA20906	cso
OG0007527	WBGene00019935	PPA23468	cso
OG0006873	WBGene00010418	ppa_stranded_DN17908_c0_g3_i1	cso
OG0005492	WBGene00009059	PPA41966	cso
OG0007344	WBGene00001523	PPA28404	cso
OG0003309	WBGene00015135	ppa_stranded_DN28124_c0_g2_i2	cso
OG0008802	WBGene00022471	PPA07465	cso
OG0007614	WBGene00011238	PPA45321	cso
OG0007315	WBGene00010835	UMM-S285-0.0-mRNA-1_frag_2	cso
OG0003470	WBGene00007242	PPA40117	cso
OG0004824	WBGene00016973	PPA18570	cso
OG0006499	WBGene00018811	PPA16775	cso
OG0005029	WBGene00008509	PPA38612	cso
OG0005774	WBGene00044138	PPA20588	cso
OG0009136	WBGene00004282	ppa_stranded_DN10542_c0_g1_i1	cso
OG0008408	WBGene00020846	PPA20613	cso
OG0007752	WBGene00044641	Iso_D.5498.1	cso
OG0004715	WBGene00016877	PPA03255	cso
OG0003486	WBGene00007252	ppa_stranded_DN30180_c0_g1_i2	cso
OG0003631	WBGene00015512	PPA16008	cso
OG0009662	WBGene00022104	ppa_stranded_DN8612_c0_g1_i1	cso
OG0008691	WBGene00001604	PPA05543	cso
OG0009306	WBGene00013103	PPA23637	cso
OG0008645	WBGene00012352	ppa_stranded_DN31033_c1_g6_i8	cso
OG0008281	WBGene00020704	PPA41416	cso
OG0008583	WBGene00012271	ppa_stranded_DN29302_c0_g1_i1	cso
OG0008417	WBGene00020855	PPA03916	cso
OG0007562	WBGene00019973	PPA26965	cso
OG0009708	WBGene00022176	ppa_stranded_DN30057_c2_g1_i1	cso
OG0006836	WBGene00010397	PPA06957	cso
OG0005540	WBGene00017772	PPA12964	cso
OG0006702	WBGene00001570	PPA30048	cso
OG0006094	WBGene00009626	ppa_stranded_DN21997_c0_g1_i1	cso
OG0008139	WBGene00001952	ppa_stranded_DN12824_c0_g1_i1	cso
OG0003753	WBGene00007486	PPA02994	cso
OG0007647	WBGene00020029	PPA16027	cso
OG0006130	WBGene00009647	PPA39794	cso
OG0004836	WBGene00044542	ppa_stranded_DN24819_c0_g3_i1	cso
OG0007436	WBGene00019830	ppa_stranded_DN21051_c0_g1_i1	cso
OG0005309	WBGene00008800	PPA02884	cso
OG0008367	WBGene00020800	ppa_stranded_DN19525_c0_g2_i1	cso
OG0006070	WBGene00018293	PPA10361	cso
OG0003458	WBGene00015300	PPA20950	cso
OG0005960	WBGene00018144	PPA38684	cso
OG0003843	WBGene00007559	Contig14-snapTAU.419	cso
OG0009457	WBGene00021939	PPA15013	cso
OG0005308	WBGene00008799	PPA18583	cso
OG0004014	WBGene00016029	PPA01783	cso
OG0006315	WBGene00003055	PPA34110	cso
OG0004244	WBGene00016329	ppa_stranded_DN23791_c0_g2_i2	cso
OG0006244	WBGene00018488	ppa_stranded_DN31080_c2_g2_i8	cso
OG0003351	WBGene00007170	ppa_stranded_DN29395_c0_g1_i1	cso
OG0005789	WBGene00009318	ppa_stranded_DN36137_c0_g1_i1	cso
OG0007328	WBGene00004206	ppa_stranded_DN23612_c0_g1_i2	cso
OG0009488	WBGene00013264	ppa_stranded_DN25919_c0_g1_i1	cso
OG0008021	WBGene00020396	ppa_stranded_DN26238_c0_g2_i2	cso
OG0005887	WBGene00194916	PPA35084	cso
OG0004330	WBGene00007942	ppa_stranded_DN24118_c0_g1_i1	cso
OG0008378	WBGene00020812	ppa_stranded_DN19705_c0_g1_i1	cso
OG0008034	WBGene00020418	ppa_stranded_DN25269_c0_g1_i1	cso
OG0004495	WBGene00016614	PPA45195	cso
OG0007719	WBGene00011275	PPA39049	cso
OG0006717	WBGene00019030	PPA14536	cso
OG0004529	WBGene00008091	PPA04017	cso
OG0006018	WBGene00018215	PPA19539	cso
OG0008370	WBGene00020798	ppa_stranded_DN28750_c1_g2_i1	cso
OG0005671	WBGene00001721	UMA-S2874-2.38-mRNA-1_frag	cso
OG0005652	WBGene00000002	ppa_stranded_DN19929_c1_g1_i1	cso
OG0006518	WBGene00018827	ppa_stranded_DN31241_c1_g1_i2	cso
OG0004286	WBGene00016396	PPA02932	cso
OG0006463	WBGene00010010	ppa_stranded_DN1243_c0_g1_i1	cso
OG0007088	WBGene00019481	PPA24974	cso
OG0006609	WBGene00004225	ppa_stranded_DN24688_c0_g1_i1	cso
OG0006693	WBGene00000183	ppa_stranded_DN27074_c0_g3_i3	cso
OG0004705	WBGene00016874	ppa_stranded_DN14056_c0_g1_i1	cso
OG0004183	WBGene00016235	ppa_stranded_DN15194_c0_g1_i1	cso
OG0003478	WBGene00006510	PPA18589	cso
OG0005355	WBGene00017530	PPA23480	cso
OG0004993	WBGene00017125	PPA07812	cso
OG0006058	WBGene00018251	PPA39943	cso
OG0007716	WBGene00011272	ppa_stranded_DN31292_c1_g2_i2	cso
OG0004945	WBGene00008436	ppa_stranded_DN27602_c0_g1_i6	cso
OG0006274	WBGene00009800	PPA05687	cso
OG0004923	WBGene00008427	PPA35576	cso
OG0006333	WBGene00018640	PPA22039	cso
OG0007734	WBGene00020134	ppa_stranded_DN27812_c1_g1_i2	cso
OG0007518	WBGene00011094	PPA32387	cso
OG0009421	WBGene00021870	PPA11590	cso
OG0006188	WBGene00009717	PPA07830	cso
OG0008322	WBGene00011965	ppa_stranded_DN8774_c0_g1_i1	cso
OG0009504	WBGene00013311	PPA38725	cso
OG0005633	WBGene00017826	ppa_stranded_DN17958_c0_g1_i1	cso
OG0009868	WBGene00022504	PPA21870	cso
OG0006691	WBGene00010205	ppa_stranded_DN26856_c0_g1_i1	cso
OG0005727	WBGene00005022	ppa_stranded_DN11456_c0_g2_i1	cso
OG0003721	WBGene00015620	ppa_stranded_DN28975_c0_g1_i1	cso
OG0007797	WBGene00001723	PPA09502	cso
OG0007786	WBGene00020169	ppa_stranded_DN28930_c0_g1_i5	cso
OG0008476	WBGene00020909	PPA08089	cso
OG0006281	WBGene00018533	PPA38354	cso
OG0008168	WBGene00011833	ppa_stranded_DN9121_c0_g1_i1	cso
OG0004573	WBGene00044571	PPA23476	cso
OG0003304	WBGene00015125	ppa_stranded_DN28325_c0_g1_i1	cso
OG0007739	WBGene00011314	PPA36583	cso
OG0006522	WBGene00010069	PPA28248	cso
OG0009610	WBGene00013457	PPA39298	cso
OG0009115	WBGene00021546	ppa_stranded_DN31432_c0_g1_i1	cso
OG0006791	WBGene00010337	ppa_stranded_DN29263_c0_g2_i1	cso
OG0006361	WBGene00003776	PPA05700	cso
OG0003579	WBGene00007325	PPA21671	cso
OG0010082	WBGene00006952	PPA21393	cso
OG0008509	WBGene00012203	PPA18431	cso
OG0006341	WBGene00009899	ppa_stranded_DN9316_c0_g1_i1	cso
OG0007784	WBGene00001716	PPA12836	cso
OG0010155	WBGene00006768	PPA15031	cso
OG0009139	WBGene00012863	ppa_stranded_DN19906_c0_g3_i2	cso
OG0005009	WBGene00008496	PPA35403	cso
OG0007301	WBGene00005153	ppa_stranded_DN30824_c0_g2_i10	cso
OG0004335	WBGene00016423	PPA26271	cso
OG0006915	WBGene00019280	PPA18564	cso
OG0007152	WBGene00010683	PPA20943	cso
OG0004439	WBGene00008040	PPA10284	cso
OG0007048	WBGene00019426	ppa_stranded_DN18826_c0_g1_i1	cso
OG0009946	WBGene00022629	ppa_stranded_DN31011_c1_g1_i1	cso
OG0008306	WBGene00011948	PPA39983	cso
OG0008414	WBGene00003933	PPA23683	cso
OG0006809	WBGene00010359	PPA32335	cso
OG0003664	WBGene00206364	PPA39359	cso
OG0004561	WBGene00016700	ppa_stranded_DN26868_c0_g1_i1	cso
OG0005659	WBGene00270320	PPA00261	cso
OG0007248	WBGene00001210	PPA40241	cso
OG0005820	WBGene00000298	PPA01841	cso
OG0008278	WBGene00044705	ppa_stranded_DN20014_c0_g1_i1	cso
OG0006975	WBGene00019345	PPA23488	cso
OG0005657	WBGene00009191	PPA35659	pso
OG0006889	WBGene00001352	PPA36620	pso
OG0004449	WBGene00008052	PPA40119	pso
OG0006690	WBGene00001553	ppa_stranded_DN16572_c0_g1_i1	pso
OG0008244	WBGene00020647	PPA38627	pso
OG0009755	WBGene00022273	PPA39390	pso
OG0004671	WBGene00016803	ppa_stranded_DN30694_c0_g2_i1	pso
OG0004166	WBGene00003801	PPA21762	pso
OG0006710	WBGene00010231	ppa_stranded_DN31626_c1_g10_i3	pso
OG0009762	WBGene00013532	ppa_stranded_DN31640_c2_g27_i6	pso
OG0006762	WBGene00019076	ppa_stranded_DN17640_c0_g1_i1	pso
OG0007225	WBGene00010758	ppa_stranded_DN28898_c1_g1_i5	pso
OG0007805	WBGene00001035	ppa_stranded_DN18832_c0_g2_i1	pso
OG0007155	WBGene00010699	ppa_stranded_DN18470_c0_g1_i1	pso
OG0006875	WBGene00019246	ppa_stranded_DN31610_c0_g6_i1	pso
OG0007061	WBGene00001743	ppa_stranded_DN13834_c0_g1_i1	pso
OG0006326	WBGene00009881	PPA38622	pso
OG0007945	WBGene00020297	ppa_stranded_DN31747_c0_g1_i1	pso
OG0006162	WBGene00018405	PPA14145	pso
OG0009414	WBGene00021882	ppa_stranded_DN22978_c1_g1_i2	pso
OG0008641	WBGene00021104	PPA40267	pso
OG0009103	WBGene00002229	PPA25521	pso
OG0008110	WBGene00000085	PPA03851	pso
OG0005207	WBGene00008665	ppa_stranded_DN31309_c1_g2_i1	pso
OG0007064	WBGene00010616	ppa_stranded_DN18064_c0_g2_i1	pso
OG0005695	WBGene00009219	PPA38591	pso
OG0005747	WBGene00009276	ppa_stranded_DN24225_c0_g1_i2	pso
OG0006526	WBGene00018835	ppa_stranded_DN24416_c0_g1_i2	pso
OG0004160	WBGene00002985	PPA27311	pso
OG0003946	WBGene00007652	ppa_stranded_DN39718_c0_g1_i1	pso
OG0004115	WBGene00016151	ppa_stranded_DN23957_c0_g1_i5	pso
OG0007091	WBGene00010629	ppa_stranded_DN31092_c1_g6_i1	pso
OG0006420	WBGene00009958	ppa_stranded_DN27091_c0_g1_i1	pso
OG0006760	WBGene00010306	ppa_stranded_DN29577_c0_g2_i2	pso
OG0005814	WBGene00017989	ppa_stranded_DN31292_c0_g1_i2	pso
OG0007165	WBGene00010713	PPA04138	pso
OG0006113	WBGene00004979	PPA32901	pso
OG0010011	WBGene00022883	PPA16819	pso
OG0009889	WBGene00022579	PPA19920	pso
OG0004955	WBGene00017087	ppa_stranded_DN27661_c0_g1_i3	pso
OG0004181	WBGene00016234	PPA01881	pso
OG0007501	WBGene00006958	ppa_stranded_DN24580_c0_g2_i1	pso
OG0007438	WBGene00044021	PPA08808	pso
OG0009983	WBGene00014221	PPA14347	pso
OG0007382	WBGene00019766	PPA38613	pso
OG0007533	WBGene00011110	PPA11326	pso
OG0005059	WBGene00017193	ppa_stranded_DN32008_c0_g1_i1	pso
OG0003691	WBGene00015581	ppa_stranded_DN30135_c0_g1_i2	pso
OG0008418	WBGene00003025	ppa_stranded_DN27457_c0_g1_i2	pso
OG0007674	WBGene00011263	PPA37801	pso
OG0008050	WBGene00011713	PPA25010	pso
OG0004785	WBGene00004788	PPA38495	pso
OG0007815	WBGene00020195	PPA22004	pso
OG0009445	WBGene00021930	ppa_stranded_DN31143_c2_g1_i2	pso
OG0009577	WBGene00022025	ppa_stranded_DN15579_c0_g1_i1	pso
OG0007065	WBGene00003036	ppa_stranded_DN31595_c3_g1_i3	pso
OG0007851	WBGene00000696	PPA40518	pso
OG0008866	WBGene00021277	ppa_stranded_DN26743_c0_g2_i1	pso
OG0005235	WBGene00004341	ppa_stranded_DN30276_c5_g13_i1	pso
OG0005698	WBGene00004706	ppa_stranded_DN26955_c0_g2_i2	pso
OG0004526	WBGene00016653	PPA43285	pso
OG0008807	WBGene00022493	isototal.3464.2	pso
OG0007050	WBGene00010592	PPA12917	pso
OG0009959	WBGene00164985	PPA15101	pso
OG0006674	WBGene00004462	PPA33425	pso
OG0010109	WBGene00013983	PPA45466	pso
OG0007575	WBGene00011182	PPA21784	pso
OG0007070	WBGene00010614	PPA39857	pso
OG0006464	WBGene00000164	PPA39075	pso
OG0003239	WBGene00007114	PPA38633	pso
OG0009661	WBGene00004891	PPA15358	pso
OG0007896	WBGene00011508	ppa_stranded_DN17664_c0_g1_i1	pso
OG0007012	WBGene00044311	ppa_stranded_DN24113_c0_g3_i1	pso
OG0008873	WBGene00021295	ppa_stranded_DN32724_c0_g1_i1	pso
OG0005472	WBGene00017688	PPA05667	pso
OG0009275	WBGene00021736	ppa_stranded_DN9207_c0_g1_i1	pso
OG0006785	WBGene00019118	ppa_stranded_DN30353_c1_g1_i5	pso
OG0007694	WBGene00020110	PPA44573	pso
OG0009034	WBGene00004164	ppa_stranded_DN29951_c0_g3_i5	pso
OG0009927	WBGene00013892	PPA32323	pso
OG0004928	WBGene00004704	isopolya.3147.1	pso
OG0006208	WBGene00009730	PPA11330	pso
OG0008445	WBGene00012121	PPA19734	pso
OG0003238	WBGene00007113	ppa_stranded_DN31686_c2_g2_i5	pso
OG0004547	WBGene00008107	ppa_stranded_DN29604_c1_g1_i1	pso
OG0005972	WBGene00001029	PPA17233	pso
OG0007708	WBGene00020125	ppa_stranded_DN23720_c0_g1_i2	pso
OG0005035	WBGene00303021	Contig197-snapTAU.5	pso
OG0007158	WBGene00004276	PPA17392	pso
OG0003970	WBGene00001096	PPA18697	pso
OG0005445	WBGene00009002	PPA01892	pso
OG0006563	WBGene00018869	PPA21293	pso
OG0008358	WBGene00305157	PPA08719	pso
OG0006362	WBGene00044303	PPA32231	pso
OG0007706	WBGene00011269	PPA25529	pso
OG0008827	WBGene00044030	PPA08232	pso
OG0005563	WBGene00017797	ppa_stranded_DN26237_c0_g3_i1	pso
OG0009061	WBGene00012759	PPA40044	pso
OG0005849	WBGene00018014	ppa_stranded_DN23945_c0_g2_i1	pso
OG0004063	WBGene00016103	ppa_stranded_DN23211_c0_g1_i1	pso
OG0007137	WBGene00010670	PPA07209	pso
OG0005407	WBGene00006676	PPA20590	pso
OG0007287	WBGene00006595	PPA09255	pso
OG0005833	WBGene00006634	PPA40144	pso
OG0008993	WBGene00012658	ppa_stranded_DN29090_c1_g1_i2	pso
OG0006373	WBGene00003391	PPA25431	pso
OG0004200	WBGene00016261	Iso_D.14461.1	pso
OG0007777	WBGene00011368	ppa_stranded_DN21714_c0_g2_i2	pso
OG0005205	WBGene00003564	PPA17055	pso
OG0007038	WBGene00019403	ppa_stranded_DN26537_c0_g2_i1	pso
OG0006530	WBGene00010063	PPA34610	pso
OG0007487	WBGene00019904	ppa_stranded_DN21146_c0_g1_i1	pso
OG0006502	WBGene00010055	ppa_stranded_DN16547_c0_g1_i1	pso
OG0009509	WBGene00013323	ppa_stranded_DN16773_c0_g1_i1	pso
OG0008591	WBGene00012289	PPA06720	pso
OG0008214	WBGene00004326	PPA02445	pso
OG0005584	WBGene00009131	ppa_stranded_DN30428_c1_g1_i11	pso
OG0007483	WBGene00019899	PPA33941	pso
OG0008058	WBGene00001989	ppa_stranded_DN25549_c1_g2_i1	pso
OG0008033	WBGene00020417	PPA35715	pso
OG0009415	WBGene00021888	ppa_stranded_DN24787_c0_g2_i1	pso
OG0008482	WBGene00012166	seq8	pso
OG0005283	WBGene00008769	ppa_stranded_DN36465_c0_g1_i1	pso
OG0005522	WBGene00017760	Contig11-snapTAU.554	pso
OG0007143	WBGene00019544	PPA46053	pso
OG0007855	WBGene00020234	PPA38567	pso
OG0008458	WBGene00000284	PPA06468	pso
OG0008740	WBGene00022453	ppa_stranded_DN8968_c0_g1_i1	pso
OG0006068	WBGene00018282	PPA10259	pso
OG0003741	WBGene00044295	ppa_stranded_DN8966_c0_g1_i1	pso
OG0008766	WBGene00013742	PPA25069	pso
OG0008507	WBGene00012206	PPA11881	pso
OG0010006	WBGene00022865	PPA20122	pso
OG0007314	WBGene00001572	PPA20390	pso
OG0003707	WBGene00000142	ppa_stranded_DN19832_c0_g1_i1	pso
OG0008137	WBGene00020528	ppa_stranded_DN24600_c0_g1_i1	pso
OG0003692	WBGene00000479	PPA02603	pso
OG0004133	WBGene00043156	PPA15425	pso
OG0009765	WBGene00000370	PPA19753	pso
OG0007592	WBGene00003157	ppa_stranded_DN31152_c0_g2_i1	pso
OG0003282	WBGene00000886	Contig26-snapTAU.120	pso
OG0003353	WBGene00044636	ppa_stranded_DN24605_c0_g2_i3	pso
OG0003416	WBGene00007195	ppa_stranded_DN31482_c0_g8_i1	pso
OG0007298	WBGene00019719	ppa_stranded_DN28186_c0_g1_i4	pso
OG0005942	WBGene00000976	ppa_stranded_DN22979_c1_g2_i2	pso
OG0008217	WBGene00011868	ppa_stranded_DN22804_c0_g1_i2	pso
OG0005192	WBGene00017356	ppa_stranded_DN31066_c0_g2_i1	pso
OG0009650	WBGene00077455	PPA22914	pso
OG0003862	WBGene00015779	ppa_stranded_DN30570_c0_g2_i1	pso
OG0003754	WBGene00015651	ppa_stranded_DN16383_c0_g1_i1	pso
OG0004038	WBGene00007704	PPA36097	pso
OG0005717	WBGene00006706	ppa_stranded_DN19527_c0_g2_i1	pso
OG0008826	WBGene00012469	ppa_stranded_DN21636_c0_g3_i1	pso
OG0005007	WBGene00008488	PPA17153	pso
OG0008276	WBGene00001622	PPA19690	pso
OG0006100	WBGene00018344	PPA12252	pso
OG0004454	WBGene00016567	Iso_D.13269.1	pso
OG0003413	WBGene00015233	ppa_stranded_DN25836_c0_g1_i1	pso
OG0006312	WBGene00018603	PPA39276	pso
OG0009915	WBGene00013882	ppa_stranded_DN44483_c0_g1_i1	pso
OG0008596	WBGene00012291	ppa_stranded_DN15470_c0_g2_i1	pso
OG0007405	WBGene00010967	ppa_stranded_DN26998_c0_g1_i1	pso
OG0006513	WBGene00000279	PPA12113	pso
OG0005284	WBGene00008764	ppa_stranded_DN31317_c0_g2_i1	pso
OG0003694	WBGene00003024	PPA20015	pso
OG0005224	WBGene00008692	ppa_stranded_DN17913_c0_g2_i1	pso
OG0010223	WBGene00014101	PPA00976	pso
OG0003949	WBGene00023491	PPA03440	pso
OG0007449	WBGene00010993	PPA21669	pso
OG0006041	WBGene00009578	PPA18417	pso
OG0008764	WBGene00013740	PPA36622	pso
OG0005919	WBGene00009453	ppa_stranded_DN17902_c0_g1_i1	pso
OG0009144	WBGene00021558	PPA16968	pso
OG0007887	WBGene00011498	PPA33222	pso
OG0006265	WBGene00018517	PPA00163	pso
OG0004448	WBGene00006739	PPA22590	pso
OG0007352	WBGene00006658	PPA23341	pso
OG0008732	WBGene00022434	ppa_stranded_DN27485_c0_g1_i6	pso
OG0006317	WBGene00018610	ppa_stranded_DN25354_c0_g1_i1	pso
OG0003655	WBGene00015559	PPA31243	pso
OG0009791	WBGene00013575	PPA06258	pso
OG0010244	WBGene00014141	PPA00358	pso
OG0010265	WBGene00007068	PPA38461	pso
OG0003770	WBGene00007501	PPA21350	pso
OG0005311	WBGene00008820	ppa_stranded_DN14759_c0_g1_i1	pso
OG0010141	WBGene00014020	PPA11302	pso
OG0004990	WBGene00017129	PPA40271	pso
OG0005785	WBGene00009304	PPA40253	pso
OG0004625	WBGene00016745	PPA43455	pso
OG0003261	WBGene00015027	PPA24412	pso
OG0009892	WBGene00022584	PPA03959	pso
OG0005692	WBGene00009208	Iso_D.6620.6	pso
OG0007361	WBGene00006873	PPA09930	pso
OG0009704	WBGene00003941	PPA00851	pso
OG0009395	WBGene00021848	UMM-S50-12.34-mRNA-1_truncated_curated	pso
OG0009049	WBGene00021493	PPA37829	pso
OG0003506	WBGene00006431	PPA23928	pso
OG0006541	WBGene00010077	ppa_stranded_DN26895_c0_g1_i1	pso
OG0004891	WBGene00008401	PPA10730	pso
OG0005520	WBGene00004503	PPA40456	pso
OG0006119	WBGene00000117	ppa_stranded_DN29637_c1_g1_i8	pso
OG0003469	WBGene00007236	PPA39459	pso
OG0007127	WBGene00019536	PPA40326	pso
OG0008870	WBGene00021296	ppa_stranded_DN39734_c0_g1_i1	pso
OG0009494	WBGene00021960	PPA09441	pso
OG0005409	WBGene00008956	ppa_stranded_DN20247_c0_g2_i1	pso
OG0007862	WBGene00011465	PPA14814	pso
OG0003984	WBGene00007690	PPA08176	pso
OG0006746	WBGene00010286	ppa_stranded_DN2756_c0_g1_i1	pso
OG0006646	WBGene00010160	ppa_stranded_DN28919_c1_g3_i1	pso
OG0010040	WBGene00000375	ppa_stranded_DN18407_c0_g1_i1	pso
OG0006451	WBGene00077786	ppa_stranded_DN24267_c0_g2_i1	pso
OG0009192	WBGene00004389	ppa_stranded_DN29373_c2_g2_i5	pso
OG0005638	WBGene00017840	PPA04732	pso
OG0010000	WBGene00014234	ppa_stranded_DN16052_c0_g2_i1	pso
OG0010168	WBGene00014051	ppa_stranded_DN30655_c1_g1_i3	pso
OG0004470	WBGene00016583	PPA13676	pso
OG0003819	WBGene00015734	PPA44361	pso
OG0004621	WBGene00016746	PPA36041	pso
OG0004800	WBGene00016955	ppa_stranded_DN19122_c0_g2_i1	pso
OG0009330	WBGene00003100	PPA31719	pso
OG0004126	WBGene00016162	ppa_stranded_DN25755_c0_g2_i1	pso
OG0005298	WBGene00017440	PPA35429	pso
OG0003268	WBGene00015064	PPA22611	pso
OG0006096	WBGene00009627	ppa_stranded_DN30645_c5_g1_i1	pso
OG0007324	WBGene00006475	UMM-S2845-12.36-mRNA-1_frag	pso
OG0008998	WBGene00012647	ppa_stranded_DN29308_c0_g1_i4	pso
OG0007285	WBGene00010806	PPA24947	pso
OG0007735	WBGene00020135	ppa_stranded_DN28307_c0_g3_i1	pso
OG0008088	WBGene00020471	ppa_stranded_DN26811_c1_g1_i1	pso
OG0004789	WBGene00016939	PPA28614	pso
OG0006784	WBGene00010333	ppa_stranded_DN43824_c0_g1_i1	pso
OG0005422	WBGene00008975	PPA10248	pso
OG0008606	WBGene00006503	PPA43327	pso
OG0004719	WBGene00003235	PPA29250	pso
OG0003885	WBGene00007608	ppa_stranded_DN24705_c0_g1_i3	pso
OG0003816	WBGene00006856	ppa_stranded_DN19168_c0_g1_i1	pso
OG0003811	WBGene00015713	PPA37003	pso
OG0010117	WBGene00013994	ppa_stranded_DN30117_c0_g1_i5	pso
OG0007861	WBGene00020246	PPA18992	pso
OG0004721	WBGene00004501	PPA37355	pso
OG0009705	WBGene00022165	PPA44331	pso
OG0008106	WBGene00011760	PPA08175	pso
OG0006010	WBGene00304237	PPA37701	pso
OG0008984	WBGene00021427	PPA40170	pso
OG0006732	WBGene00010266	PPA11925	pso
OG0005438	WBGene00009000	PPA33331	pso
OG0008351	WBGene00020779	PPA14346	pso
OG0005987	WBGene00009543	PPA42585	pso
OG0008980	WBGene00021417	ppa_stranded_DN16719_c0_g1_i1	pso
OG0007581	WBGene00019993	PPA00351	pso
OG0004024	WBGene00007696	ppa_stranded_DN19996_c0_g1_i1	pso
OG0003724	WBGene00007463	PPA35387	pso
OG0006669	WBGene00019006	isopolya.7033.1	pso
OG0007247	WBGene00019657	ppa_stranded_DN18640_c0_g1_i1	pso
OG0008702	WBGene00013679	ppa_stranded_DN19022_c0_g1_i1	pso
OG0007187	WBGene00019595	PPA17636	pso
OG0004431	WBGene00004266	PPA00540	pso
OG0005439	WBGene00219316	ppa_stranded_DN25871_c0_g1_i2	pso
OG0007101	WBGene00019492	ppa_stranded_DN23035_c0_g1_i1	pso
OG0004732	WBGene00000266	isopolya.5614.1	pso
OG0004172	WBGene00016210	ppa_stranded_DN20379_c0_g1_i2	pso
OG0005107	WBGene00017273	ppa_stranded_DN33441_c0_g1_i1	pso
OG0006145	WBGene00185048	ppa_stranded_DN11692_c0_g1_i1	pso
OG0006795	WBGene00010344	PPA20625	pso
OG0009989	WBGene00000395	ppa_stranded_DN31465_c0_g2_i1	pso
OG0005367	WBGene00008910	ppa_stranded_DN31665_c2_g7_i10	pso
OG0008355	WBGene00012004	ppa_stranded_DN20863_c0_g1_i2	pso
OG0003291	WBGene00015101	PPA15346	pso
OG0003954	WBGene00000970	ppa_stranded_DN21409_c0_g1_i2	pso
OG0004440	WBGene00008041	PPA00926	pso
OG0006998	WBGene00003991	PPA24961	pso
OG0008753	WBGene00022457	PPA26161	pso
OG0005155	WBGene00017317	ppa_stranded_DN16152_c0_g2_i1	pso
OG0008978	WBGene00021416	PPA17894	pso
OG0009080	WBGene00003885	ppa_stranded_DN31079_c1_g4_i5	pso
OG0008681	WBGene00044452	PPA24742	pso
OG0003814	WBGene00007536	PPA27748	pso
OG0005390	WBGene00017574	PPA34126	pso
OG0009472	WBGene00013238	PPA33959	pso
OG0004867	WBGene00017028	PPA02601	pso
OG0009206	WBGene00012966	ppa_stranded_DN9733_c0_g1_i1	pso
OG0006562	WBGene00000554	ppa_stranded_DN29711_c0_g2_i2	pso
OG0010185	WBGene00022801	ppa_stranded_DN28671_c0_g1_i1	pso
OG0008543	WBGene00021006	ppa_stranded_DN17490_c0_g1_i1	pso
OG0004703	WBGene00016871	PPA42336	pso
OG0009349	WBGene00050917	PPA37488	pso
OG0005068	WBGene00017217	ppa_stranded_DN28943_c1_g1_i3	pso
OG0004557	WBGene00016677	ppa_stranded_DN26348_c0_g2_i1	pso
OG0006008	WBGene00043308	PPA36063	pso
OG0007109	WBGene00303023	PPA15215	pso
OG0007610	WBGene00000163	ppa_stranded_DN30270_c2_g1_i2	pso
OG0004571	WBGene00008121	ppa_stranded_DN31087_c7_g1_i2	pso
OG0009403	WBGene00021867	PPA43221	pso
OG0008581	WBGene00012277	PPA29183	pso
OG0004535	WBGene00008094	PPA20382	pso
OG0009731	WBGene00022196	PPA02431	pso
OG0005937	WBGene00009497	PPA40365	pso
OG0009375	WBGene00021845	isopolya.6986.1	pso
OG0010007	WBGene00044588	ppa_stranded_DN20163_c0_g1_i1	pso
OG0005986	WBGene00000775	PPA27702	pso
OG0003330	WBGene00015155	PPA19966	pso
OG0008952	WBGene00000802	PPA45114	pso
OG0008919	WBGene00012544	PPA02353	pso
OG0007565	WBGene00011154	ppa_stranded_DN11375_c0_g1_i1	pso
OG0006404	WBGene00009952	isopolya.4497.1	pso
OG0005373	WBGene00008927	PPA28658	pso
OG0009374	WBGene00021844	ppa_stranded_DN11935_c0_g1_i1	pso
OG0006665	WBGene00019003	PPA43345	pso
OG0009503	WBGene00000192	PPA16737	pso
OG0009609	WBGene00013456	PPA39303	pso
OG0004434	WBGene00000048	PPA03427	pso
OG0005753	WBGene00000881	PPA18479	pso
OG0005385	WBGene00017562	PPA34082	pso
OG0009826	WBGene00013594	ppa_stranded_DN31674_c2_g4_i1	pso
OG0007325	WBGene00019759	ppa_stranded_DN2344_c0_g1_i1	pso
OG0003540	WBGene00007286	PPA39348	pso
OG0010215	WBGene00014089	PPA27433	pso
OG0009157	WBGene00001632	ppa_stranded_DN17870_c0_g1_i2	pso
OG0004058	WBGene00004308	ppa_stranded_DN17375_c0_g2_i1	pso
OG0008817	WBGene00012441	ppa_stranded_DN4195_c0_g1_i1	pso
OG0005644	WBGene00004268	PPA33671	pso
OG0005879	WBGene00018043	PPA35565	pso
OG0008748	WBGene00022465	PPA37906	pso
OG0006022	WBGene00018218	PPA19815	pso
OG0006061	WBGene00018270	PPA29874	pso
OG0007655	WBGene00000217	PPA23573	pso
OG0010205	WBGene00014081	PPA33960	pso
OG0007844	WBGene00002071	PPA09211	pso
OG0007702	WBGene00011303	ppa_stranded_DN19271_c0_g1_i1	pso
OG0008122	WBGene00020509	ppa_stranded_DN43908_c0_g1_i1	pso
OG0008091	WBGene00020479	ppa_stranded_DN16617_c0_g1_i1	pso
OG0008662	WBGene00012371	ppa_stranded_DN35403_c0_g1_i1	pso
OG0009032	WBGene00001630	PPA10316	pso
OG0005372	WBGene00008925	PPA06573	pso
OG0009836	WBGene00022360	ppa_stranded_DN27184_c0_g1_i1	pso
OG0008862	WBGene00000832	ppa_stranded_DN29415_c2_g1_i2	pso
OG0006399	WBGene00018734	PPA07385	pso
OG0007818	WBGene00007045	PPA19973	pso
OG0006082	WBGene00006067	PPA27318	pso
OG0008284	WBGene00011936	ppa_stranded_DN31495_c2_g3_i1	pso
OG0006901	WBGene00044737	ppa_stranded_DN21981_c0_g1_i2	pso
OG0008859	WBGene00004364	Iso_D.1006.1	pso
OG0006796	WBGene00006364	ppa_stranded_DN26924_c0_g1_i1	pso
OG0008371	WBGene00012019	PPA12629	pso
OG0007316	WBGene00010838	PPA19842	pso
OG0004356	WBGene00016452	PPA21103	pso
OG0003894	WBGene00000985	ppa_stranded_DN18818_c0_g2_i1	pso
OG0003522	WBGene00007268	PPA26328	pso
OG0006025	WBGene00018221	ppa_stranded_DN19850_c0_g1_i1	pso
OG0005872	WBGene00009405	PPA32939	pso
OG0007717	WBGene00001207	PPA12850	pso
OG0008597	WBGene00004336	ppa_stranded_DN29552_c0_g2_i5	pso
OG0005896	WBGene00009443	PPA38142	pso
OG0006379	WBGene00009931	PPA00365	pso
OG0005903	WBGene00018073	ppa_stranded_DN21978_c0_g1_i1	pso
OG0010072	WBGene00022697	ppa_stranded_DN20539_c0_g1_i2	pso
OG0005779	WBGene00004198	ppa_stranded_DN29410_c0_g2_i2	pso
OG0004143	WBGene00000463	PPA25533	pso
OG0008019	WBGene00020399	PPA14460	pso
OG0005636	WBGene00017837	ppa_stranded_DN26878_c0_g1_i3	pso
OG0009352	WBGene00021811	PPA00943	pso
OG0010044	WBGene00022678	PPA01285	pso
OG0010163	WBGene00044324	ppa_stranded_DN40165_c0_g1_i1	pso
OG0009326	WBGene00013139	PPA28013	pso
OG0009016	WBGene00012665	PPA37748	pso
OG0009154	WBGene00001793	Iso_D.3013.1	pso
OG0005090	WBGene00006827	PPA22436	pso
OG0007587	WBGene00011217	ppa_stranded_DN30247_c0_g1_i5	pso
OG0005411	WBGene00000188	ppa_stranded_DN23615_c0_g1_i3	pso
OG0006992	WBGene00010537	PPA37093	pso
OG0007391	WBGene00010882	ppa_stranded_DN25295_c0_g2_i2	pso
OG0006163	WBGene00009674	ppa_stranded_DN28412_c0_g3_i3	pso
OG0006978	WBGene00002044	ppa_stranded_DN20405_c0_g1_i2	pso
OG0005474	WBGene00001358	ppa_stranded_DN24339_c0_g1_i2	pso
OG0010103	WBGene00006410	PPA36993	pso
OG0010081	WBGene00022721	ppa_stranded_DN23803_c0_g1_i1	pso
OG0009759	WBGene00013517	PPA05678	pso
OG0007196	WBGene00000857	ppa_stranded_DN21327_c0_g1_i1	pso
OG0003548	WBGene00015418	PPA17323	pso
OG0003731	WBGene00003911	PPA26374	pso
OG0003920	WBGene00007622	PPA38120	pso
OG0010212	WBGene00022823	PPA31158	pso
OG0008664	WBGene00002264	ppa_stranded_DN7652_c0_g2_i1	pso
OG0009512	WBGene00013327	ppa_stranded_DN27301_c0_g2_i1	pso
OG0010027	WBGene00013934	PPA30977	pso
OG0007551	WBGene00019953	PPA29940	pso
OG0008522	WBGene00004766	PPA02323	pso
OG0004490	WBGene00001163	PPA05071	pso
OG0003910	WBGene00015807	PPA03189	pso
OG0004507	WBGene00016630	ppa_stranded_DN29971_c0_g1_i2	pso
OG0007039	WBGene00010587	ppa_stranded_DN26855_c0_g1_i2	pso
OG0005971	WBGene00009521	ppa_stranded_DN20834_c0_g1_i2	pso
OG0006844	WBGene00006760	PPA01857	pso
OG0009518	WBGene00013337	PPA24091	pso
OG0008439	WBGene00020884	PPA20677	pso
OG0008127	WBGene00011773	ppa_stranded_DN26852_c0_g1_i3	pso
OG0004464	WBGene00016590	PPA44401	pso
OG0004379	WBGene00007981	ppa_stranded_DN24420_c0_g1_i1	pso
OG0005802	WBGene00017983	ppa_stranded_DN29378_c0_g1_i6	pso
OG0007648	WBGene00020037	ppa_stranded_DN17946_c0_g1_i1	pso
OG0003967	WBGene00015942	ppa_stranded_DN25575_c0_g1_i2	pso
OG0007019	WBGene00019395	PPA31210	pso
OG0003275	WBGene00002048	PPA02638	pso
OG0006372	WBGene00018674	ppa_stranded_DN27198_c0_g1_i2	pso
OG0009914	WBGene00006663	ppa_stranded_DN29340_c0_g2_i16	pso
OG0007423	WBGene00019813	PPA15401	pso
OG0004251	WBGene00004368	ppa_stranded_DN29933_c0_g2_i8	pso
OG0006026	WBGene00018222	PPA08032	pso
OG0004262	WBGene00007883	PPA17556	pso
OG0006215	WBGene00000113	PPA11255	pso
OG0003504	WBGene00006643	ppa_stranded_DN28881_c2_g1_i3	pso
OG0008494	WBGene00012182	ppa_stranded_DN23348_c0_g1_i2	pso
OG0004478	WBGene00008065	PPA00294	pso
OG0009477	WBGene00003234	PPA03161	pso
OG0005077	WBGene00004831	PPA03034	pso
OG0006995	WBGene00002988	PPA21651	pso
OG0005328	WBGene00045418	ppa_stranded_DN29873_c4_g5_i1	pso
OG0005208	WBGene00008666	PPA30643	pso
OG0008872	WBGene00021294	ppa_stranded_DN25229_c0_g4_i1	pso
OG0009640	WBGene00022100	ppa_stranded_DN30080_c0_g1_i2	pso
OG0009248	WBGene00021692	PPA05005	pso
OG0008257	WBGene00006321	PPA24476	pso
OG0007566	WBGene00001372	ppa_stranded_DN30631_c2_g1_i4	pso
OG0003270	WBGene00015075	ppa_stranded_DN5529_c0_g1_i1	pso
OG0006484	WBGene00005014	ppa_stranded_DN49017_c0_g1_i1	pso
OG0006706	WBGene00006540	ppa_stranded_DN23346_c0_g1_i5	pso
OG0006586	WBGene00018904	PPA06399	pso
OG0004125	WBGene00001209	PPA39813	pso
OG0009008	WBGene00004249	PPA15338	pso
OG0007239	WBGene00002219	ppa_stranded_DN23747_c0_g2_i1	pso
OG0005935	WBGene00009484	PPA37057	pso
OG0008558	WBGene00012230	ppa_stranded_DN23556_c0_g1_i3	pso
OG0008323	WBGene00011966	UMM-S435-1.46-mRNA-1_frag	pso
OG0007806	WBGene00011399	PPA17840	pso
OG0004391	WBGene00001697	UMM-S71-15.76-mRNA-1_grd-8	pso
OG0004122	WBGene00004307	PPA01588	pso
OG0006747	WBGene00001466	PPA09473	pso
OG0010012	WBGene00002268	PPA07951	pso
OG0009566	WBGene00003142	ppa_stranded_DN15018_c0_g1_i1	pso
OG0007428	WBGene00019820	PPA16623	pso
OG0003489	WBGene00007256	ppa_stranded_DN24459_c0_g1_i2	pso
OG0008174	WBGene00001039	ppa_stranded_DN20813_c0_g1_i1	pso
OG0004723	WBGene00000876	PPA22420	pso
OG0005844	WBGene00017997	PPA13707	pso
OG0008616	WBGene00012316	ppa_stranded_DN28023_c0_g2_i3	pso
OG0009369	WBGene00001046	ppa_stranded_DN31163_c5_g1_i1	pso
OG0005302	WBGene00017447	ppa_stranded_DN23014_c0_g1_i1	pso
OG0009044	WBGene00021460	ppa_stranded_DN20124_c0_g1_i1	pso
OG0008570	WBGene00012245	isopolya.417.1	pso
OG0007547	WBGene00011137	PPA27681	pso
OG0009599	WBGene00013433	ppa_stranded_DN28883_c0_g2_i3	pso
OG0003559	WBGene00006782	PPA32758	pso
OG0007156	WBGene00003626	ppa_stranded_DN26204_c0_g3_i2	pso
OG0009410	WBGene00013214	ppa_stranded_DN26958_c0_g1_i1	pso
OG0008273	WBGene00020682	PPA05520	pso
OG0008046	WBGene00020425	ppa_stranded_DN28348_c0_g1_i1	pso
OG0005701	WBGene00000057	PPA09523	pso
OG0007097	WBGene00019488	PPA18592	pso
OG0004901	WBGene00008409	Contig14-snapTAU.287	pso
OG0003674	WBGene00007409	ppa_stranded_DN26469_c0_g2_i1	pso
OG0009907	WBGene00006590	ppa_stranded_DN9149_c0_g1_i1	pso
OG0004081	WBGene00016128	ppa_stranded_DN20226_c0_g2_i1	pso
OG0008546	WBGene00006586	PPA09627	pco
OG0008526	WBGene00020947	PPA15143	pco
OG0007663	WBGene00020047	ppa_stranded_DN30060_c0_g1_i2	pco
OG0007612	WBGene00011235	PPA01021	pco
OG0003801	WBGene00007516	PPA20636	pco
OG0003314	WBGene00006660	PPA36088	pco
OG0007128	WBGene00019538	PPA40811	pco
OG0004802	WBGene00016957	PPA15693	pco
OG0006841	WBGene00019198	ppa_stranded_DN23842_c0_g1_i1	pco
OG0006719	WBGene00010242	PPA19565	pco
OG0006846	WBGene00019204	PPA16913	pco
OG0008496	WBGene00012186	PPA14047	pco
OG0004389	WBGene00016505	PPA19763	pco
OG0004442	WBGene00008047	ppa_stranded_DN24812_c0_g2_i1	pco
OG0005981	WBGene00009532	PPA45077	pco
OG0008550	WBGene00020995	ppa_stranded_DN16276_c0_g1_i1	pco
OG0007849	WBGene00003075	ppa_stranded_DN28825_c0_g2_i1	pco
OG0009182	WBGene00001714	ppa_stranded_DN23686_c0_g3_i1	pco
OG0008815	WBGene00012439	PPA24537	pco
OG0003438	WBGene00007212	PPA36683	pco
OG0004275	WBGene00007903	PPA00333	pco
OG0009901	WBGene00000749	PPA03509	pco
OG0005828	WBGene00009356	PPA23883	pco
OG0010222	WBGene00022649	ppa_stranded_DN26832_c0_g1_i1	pco
OG0006057	WBGene00018250	PPA25282	pco
OG0003212	WBGene00003525	PPA30034	pco
OG0008637	WBGene00021094	PPA18545	pco
OG0008602	WBGene00012304	PPA12505	pco
OG0008236	WBGene00011891	PPA18074	pco
OG0005869	WBGene00009386	PPA30306	pco
OG0010239	WBGene00014125	PPA38998	pco
OG0009179	WBGene00012942	PPA39809	pco
OG0007914	WBGene00020283	ppa_stranded_DN25761_c0_g1_i1	pco
OG0008722	WBGene00013704	PPA39421	pco
OG0004026	WBGene00003531	ppa_stranded_DN30374_c0_g1_i5	pco
OG0004687	WBGene00008233	ppa_stranded_DN27422_c0_g1_i3	pco
OG0004560	WBGene00000603	ppa_stranded_DN23592_c0_g1_i1	pco
OG0009368	WBGene00000625	PPA39449	pco
OG0004738	WBGene00016898	PPA35052	pco
OG0009963	WBGene00000672	PPA36848	pco
OG0007598	WBGene00023416	ppa_stranded_DN14206_c0_g1_i1	pco
OG0006920	WBGene00010456	PPA22819	pco
OG0005258	WBGene00017426	PPA22851	pco
OG0007188	WBGene00045387	ppa_stranded_DN24220_c0_g1_i1	pco
OG0004632	WBGene00016749	PPA01023	pco
OG0007227	WBGene00045403	PPA00464	pco
OG0004756	WBGene00004004	PPA23730	pco
OG0010172	WBGene00006583	Iso_D.4803.1	pco
OG0009288	WBGene00003861	ppa_stranded_DN25570_c1_g1_i1	pco
OG0009988	WBGene00022662	ppa_stranded_DN29603_c0_g1_i1	pco
OG0009851	WBGene00003548	ppa_stranded_DN26406_c0_g2_i2	pco
OG0006503	WBGene00010057	PPA21023	pco
OG0009796	WBGene00022313	ppa_stranded_DN28320_c0_g2_i2	pco
OG0008443	WBGene00020893	PPA34344	pco
OG0004158	WBGene00016197	ppa_stranded_DN30400_c0_g1_i5	pco
OG0006449	WBGene00010001	ppa_stranded_DN26043_c0_g1_i2	pco
OG0005319	WBGene00017471	PPA24448	pco
OG0007750	WBGene00020148	PPA33487	pco
OG0005902	WBGene00044788	PPA22796	pco
OG0009648	WBGene00013489	ppa_stranded_DN31410_c3_g1_i2	pco
OG0009578	WBGene00022026	ppa_stranded_DN15739_c0_g1_i1	pco
OG0003492	WBGene00219375	PPA23682	pco
OG0005391	WBGene00017576	ppa_stranded_DN31455_c0_g1_i5	pco
OG0005047	WBGene00017184	PPA20648	pco
OG0009657	WBGene00013499	PPA36679	pco
OG0009099	WBGene00012794	PPA06025	pco
OG0009880	WBGene00022505	ppa_stranded_DN27433_c0_g3_i4	pco
OG0004541	WBGene00045379	seq3_C45B11.6	pco
OG0008674	WBGene00022416	PPA18674	pco
OG0004323	WBGene00016417	PPA32736	pco
OG0006834	WBGene00010396	ppa_stranded_DN31577_c4_g1_i3	pco
OG0006038	WBGene00004124	PPA38244	pco
OG0005773	WBGene00003517	PPA15980	pco
OG0005529	WBGene00009096	PPA34345	pco
OG0007183	WBGene00010727	PPA13989	pco
OG0003671	WBGene00007402	ppa_stranded_DN29739_c0_g1_i1	pco
OG0004455	WBGene00004218	PPA18510	pco
OG0003865	WBGene00015781	ppa_stranded_DN21694_c0_g1_i2	pco
OG0007345	WBGene00010881	PPA23891	pco
OG0006249	WBGene00018510	PPA43246	pco
OG0006294	WBGene00194641	PPA39454	pco
OG0008112	WBGene00020501	PPA39164	pco
OG0005010	WBGene00017154	PPA37615	pco
OG0009918	WBGene00013884	PPA45921	pco
OG0004842	WBGene00016996	ppa_stranded_DN29526_c0_g2_i1	pco
OG0009699	WBGene00022146	PPA01693	pco
OG0009861	WBGene00013852	PPA25177	pco
OG0006245	WBGene00001073	PPA42058	pco
OG0005281	WBGene00008762	ppa_stranded_DN25502_c0_g3_i1	pco
OG0006474	WBGene00010027	PPA14010	pco
OG0009621	WBGene00235279	ppa_stranded_DN21121_c0_g1_i1	pco
OG0006580	WBGene00004224	PPA26186	pco
OG0009932	WBGene00022612	ppa_stranded_DN21839_c0_g1_i1	pco
OG0006277	WBGene00009818	PPA38216	pco
OG0003495	WBGene00015332	PPA00945	pco
OG0005434	WBGene00008987	PPA26710	pco
OG0008040	WBGene00011694	PPA37714	pco
OG0004552	WBGene00000402	Contig173-snapTAU.14	pco
OG0009870	WBGene00013835	PPA12661	pco
OG0008481	WBGene00012165	PPA26173	pco
OG0007721	WBGene00020083	PPA01154	pco
OG0004169	WBGene00002827	Iso_D.10917.2	pco
OG0008180	WBGene00011838	PPA37812	pco
OG0003488	WBGene00003622	PPA43989	pco
OG0009423	WBGene00235268	PPA13746	pco
OG0007920	WBGene00011522	PPA20403	pco
OG0005412	WBGene00006666	ppa_stranded_DN24499_c0_g2_i2	pco
OG0005793	WBGene00000788	PPA39021	pco
OG0003944	WBGene00015910	ppa_stranded_DN29956_c0_g1_i2	pco
OG0008113	WBGene00001064	ppa_stranded_DN32920_c0_g1_i1	pco
OG0004476	WBGene00000039	PPA15787	pco
OG0003443	WBGene00044294	PPA13577	pco
OG0006770	WBGene00010317	PPA04177	pco
OG0005277	WBGene00044797	PPA03010	pco
OG0006443	WBGene00009997	ppa_stranded_DN12568_c0_g2_i1	pco
OG0004438	WBGene00001242	PPA15347	pco
OG0005382	WBGene00017563	PPA36143	pco
OG0006286	WBGene00018547	ppa_stranded_DN31415_c0_g2_i1	pco
OG0006337	WBGene00009889	ppa_stranded_DN27544_c1_g1_i1	pco
OG0009976	WBGene00006367	PPA27749	pco
OG0006416	WBGene00001820	PPA38805	pco
OG0009808	WBGene00013585	ppa_stranded_DN7977_c0_g2_i1	pco
OG0009398	WBGene00021850	PPA37465	pco
OG0006899	WBGene00010442	ppa_stranded_DN26084_c0_g4_i1	pco
OG0007360	WBGene00000853	PPA09931	pco
OG0007539	WBGene00003888	PPA33821	pco
OG0006165	WBGene00001059	ppa_stranded_DN26763_c0_g1_i1	pco
OG0009924	WBGene00220261	ppa_stranded_DN8894_c0_g1_i1	pco
OG0005874	WBGene00009408	ppa_stranded_DN16480_c0_g1_i1	pco
OG0006263	WBGene00018515	ppa_stranded_DN31025_c1_g1_i4	pco
OG0006808	WBGene00019148	PPA43663	pco
OG0010016	WBGene00006947	PPA18369	pco
OG0003822	WBGene00007552	PPA42076	pco
OG0005596	WBGene00017814	ppa_stranded_DN30541_c5_g2_i1	pco
OG0004220	WBGene00007836	PPA03076	pco
OG0008162	WBGene00020554	ppa_stranded_DN26295_c1_g1_i1	pco
OG0005528	WBGene00009094	PPA28877	pco
OG0005697	WBGene00009218	ppa_stranded_DN26431_c0_g1_i1	pco
OG0006725	WBGene00077697	PPA45858	pco
OG0007214	WBGene00010738	PPA11944	pco
OG0006410	WBGene00018726	PPA13112	pco
OG0005772	WBGene00000902	PPA15978	pco
OG0005726	WBGene00003071	PPA10728	pco
OG0008171	WBGene00011836	ppa_stranded_DN29665_c0_g1_i1	pco
OG0008572	WBGene00012256	ppa_stranded_DN7825_c0_g1_i1	pco
OG0008309	WBGene00044623	PPA27327	pco
OG0006734	WBGene00010268	ppa_stranded_DN21171_c0_g1_i1	pco
OG0008286	WBGene00011938	PPA20337	pco
OG0004663	WBGene00008222	ppa_stranded_DN23735_c1_g1_i2	pco
OG0003918	WBGene00015822	ppa_stranded_DN9674_c0_g1_i1	pco
OG0009581	WBGene00302974	PPA36082	pco
OG0003583	WBGene00015479	ppa_stranded_DN27510_c0_g1_i1	pco
OG0006174	WBGene00018418	Iso_D.7434.6	pco
OG0003562	WBGene00000503	ppa_stranded_DN8948_c0_g1_i1	pco
OG0004252	WBGene00004217	ppa_stranded_DN27467_c0_g2_i1	pco
OG0007814	WBGene00020194	PPA22003	pco
OG0005263	WBGene00017429	PPA34925	pco
OG0003457	WBGene00015298	ppa_stranded_DN21901_c0_g1_i1	pco
OG0009931	WBGene00022611	ppa_stranded_DN15386_c0_g1_i1	pco
OG0008393	WBGene00012032	PPA16168	pco
OG0007092	WBGene00010630	ppa_stranded_DN27891_c0_g1_i1	pco
OG0005662	WBGene00000992	PPA08425	pco
OG0009497	WBGene00021963	PPA14232	pco
OG0003629	WBGene00015510	ppa_stranded_DN44046_c0_g1_i1	pco
OG0004022	WBGene00004216	PPA09400	pco
OG0003355	WBGene00007174	PPA00228	pco
OG0009342	WBGene00013173	ppa_stranded_DN28986_c0_g1_i2	pco
OG0008123	WBGene00003968	ppa_stranded_DN18754_c0_g2_i1	pco
OG0010196	WBGene00022816	PPA24835	pco
OG0003751	WBGene00007479	PPA25175	pco
OG0007489	WBGene00000399	PPA16279	pco
OG0007365	WBGene00010924	PPA17384	pco
OG0005719	WBGene00004120	PPA35468	pco
OG0007868	WBGene00011468	ppa_stranded_DN16657_c0_g1_i1	pco
OG0006375	WBGene00018682	ppa_stranded_DN29153_c1_g1_i5	pco
OG0003947	WBGene00003553	PPA07065	pco
OG0007979	WBGene00020343	PPA18299	pco
OG0007973	WBGene00004229	PPA07071	pco
OG0008999	WBGene00004233	PPA19961	pco
OG0003877	WBGene00007600	PPA35891	pco
OG0008843	WBGene00000623	ppa_stranded_DN12219_c0_g1_i1	pco
OG0003883	WBGene00000521	ppa_stranded_DN24268_c0_g2_i1	pco
OG0007686	WBGene00020104	PPA15234	pco
OG0005688	WBGene00009205	PPA36355	pco
OG0006542	WBGene00044631	ppa_stranded_DN30486_c0_g5_i2	pco
OG0003256	WBGene00015019	PPA01713	pco
OG0009863	WBGene00022517	Iso_D.14327.2	pco
OG0007843	WBGene00003534	PPA21998	pco
OG0005005	WBGene00001065	PPA17448	pco
OG0004878	WBGene00008376	PPA18215	pco
OG0005639	WBGene00017841	PPA25324	pco
OG0004533	WBGene00002282	Contig54-snapTAU.133	pco
OG0004532	WBGene00008093	Contig54-snapTAU.130	pco
OG0010136	WBGene00004992	PPA07225	pco
OG0006811	WBGene00019154	PPA06408	pco
OG0003859	WBGene00004104	PPA14222	pco
OG0004534	WBGene00006366	PPA20381	pco
OG0007568	WBGene00011175	PPA33953	pco
OG0004157	WBGene00016196	ppa_stranded_DN11011_c0_g1_i1	pco
OG0007919	WBGene00011530	PPA28156	pco
OG0003404	WBGene00015218	ppa_stranded_DN24936_c0_g1_i2	pco
OG0006299	WBGene00009830	PPA45454	pco
OG0008573	WBGene00012257	PPA18808	pco
OG0007701	WBGene00003107	PPA10110	pco
OG0006680	WBGene00004133	ppa_stranded_DN21638_c0_g2_i1	pco
OG0006729	WBGene00000678	ppa_stranded_DN31569_c7_g1_i1	pco
OG0006363	WBGene00009926	isopolya.5550.1	pco
OG0009757	WBGene00022274	PPA04862	pco
OG0006292	WBGene00018572	PPA04586	pco
OG0008240	WBGene00020646	ppa_stranded_DN24703_c0_g1_i3	pco
OG0008682	WBGene00022423	PPA39232	pco
OG0007323	WBGene00019756	PPA34521	pco
OG0006240	WBGene00001069	ppa_stranded_DN16548_c0_g1_i1	pco
OG0003931	WBGene00015841	PPA39960	pco
OG0004603	WBGene00008150	ppa_stranded_DN24913_c0_g1_i1	pco
OG0009783	WBGene00013543	PPA12107	pco
OG0008600	WBGene00004859	PPA20587	pco
OG0004544	WBGene00004219	ppa_stranded_DN21683_c0_g1_i1	pco
OG0003440	WBGene00007214	ppa_stranded_DN7835_c0_g1_i1	pco
OG0009651	WBGene00006505	ppa_stranded_DN29249_c0_g1_i6	pco
OG0009926	WBGene00013891	ppa_stranded_DN22061_c0_g1_i1	pco
OG0004010	WBGene00016022	PPA19297	pco
OG0008571	WBGene00012255	ppa_stranded_DN21415_c0_g2_i1	pco
OG0009100	WBGene00012796	ppa_stranded_DN26788_c0_g1_i1	pco
OG0006254	WBGene00009791	PPA37688	pco
OG0008908	WBGene00021343	ppa_stranded_DN19105_c0_g2_i1	pco
OG0006779	WBGene00010330	PPA38428	pco
OG0008032	WBGene00020413	PPA27737	pco
OG0007866	WBGene00004264	ppa_stranded_DN31181_c2_g1_i1	pco
OG0005369	WBGene00185014	ppa_stranded_DN43957_c0_g1_i1	pco
OG0007908	WBGene00020270	PPA34317	pco
OG0008114	WBGene00001072	ppa_stranded_DN24552_c0_g1_i1	pco
OG0007149	WBGene00000220	ppa_stranded_DN16963_c0_g1_i1	pco
OG0009896	WBGene00022591	PPA01078	pco
OG0007311	WBGene00000928	PPA25309	pco
OG0008964	WBGene00000683	PPA34147	pco
OG0003647	WBGene00015545	PPA00537	pco
OG0008544	WBGene00021008	PPA10692	pco
OG0009869	WBGene00003104	PPA11447	pco
OG0008906	WBGene00012540	PPA32140	pco
OG0007118	WBGene00019520	PPA02993	pco
OG0007326	WBGene00019760	PPA25742	pco
OG0004084	WBGene00016132	PPA13616	pco
OG0004631	WBGene00008180	PPA02737	pco
OG0008638	WBGene00021095	PPA20896	pco
OG0005813	WBGene00009331	PPA40240	pco
OG0007986	WBGene00020366	ppa_stranded_DN19286_c0_g1_i1	pco
OG0005147	WBGene00017308	PPA39904	pco
OG0005800	WBGene00044530	PPA37902	pco
OG0010049	WBGene00013926	PPA14677	pco
OG0007357	WBGene00010917	PPA04578	pco
OG0005531	WBGene00009099	PPA31838	pco
OG0008166	WBGene00011831	ppa_stranded_DN20930_c0_g1_i1	pco
OG0009821	WBGene00001704	PPA19300	pco
OG0004085	WBGene00016133	PPA36988	pco
OG0009811	WBGene00013592	PPA06642	pco
OG0010176	WBGene00044630	PPA38545	pco
OG0008177	WBGene00020561	PPA36835	pco
OG0006618	WBGene00000969	PPA33961	pco
OG0006644	WBGene00003878	PPA23674	pco
OG0008972	WBGene00004232	PPA09165	pco
OG0003343	WBGene00219208	PPA09399	pco
OG0007526	WBGene00011107	PPA38905	pco
OG0004961	WBGene00008449	PPA24467	pco
OG0008154	WBGene00020551	ppa_stranded_DN23114_c0_g1_i3	pco
OG0004489	WBGene00045024	PPA29866	pco
OG0005900	WBGene00004025	ppa_stranded_DN26800_c0_g1_i2	pco
OG0006797	WBGene00010345	PPA18720	pco
OG0004682	WBGene00001430	ppa_stranded_DN26777_c0_g1_i4	pco
OG0003593	WBGene00003523	PPA08402	pco
OG0009252	WBGene00001707	PPA28052	pco
OG0005332	WBGene00008851	ppa_stranded_DN20038_c0_g1_i2	pco
OG0006066	WBGene00000746	PPA06858	pco
OG0009903	WBGene00013872	PPA15954	pco
OG0006709	WBGene00003547	ppa_stranded_DN25685_c0_g1_i1	pco
OG0008578	WBGene00012261	ppa_stranded_DN16775_c0_g3_i1	pco
OG0008250	WBGene00004230	ppa_stranded_DN27956_c0_g3_i1	pco
OG0006790	WBGene00010336	PPA00342	pco
OG0006046	WBGene00009582	PPA12609	pco
OG0003744	WBGene00015645	ppa_stranded_DN25553_c0_g1_i2	pco
OG0008144	WBGene00011796	PPA12591	pco
OG0003610	WBGene00007344	ppa_stranded_DN26974_c0_g1_i2	pco
OG0009660	WBGene00022103	PPA03277	pco
OG0008029	WBGene00020421	PPA00171	pco
OG0005845	WBGene00017998	ppa_stranded_DN25546_c0_g1_i1	pco
OG0009589	WBGene00001633	ppa_stranded_DN20765_c0_g1_i3	pco
OG0009887	WBGene00022577	ppa_stranded_DN19234_c0_g1_i1	pco
OG0009110	WBGene00012814	PPA18176	pco
OG0009515	WBGene00013331	PPA11586	pco
OG0005113	WBGene00008605	PPA31040	pco
OG0006879	WBGene00001148	PPA27284	pco
OG0009945	WBGene00022627	PPA02242	pco
OG0005088	WBGene00017243	PPA44899	pco
OG0006011	WBGene00006640	PPA09622	pco
OG0006602	WBGene00018928	ppa_stranded_DN29579_c0_g2_i2	pco
OG0007418	WBGene00010972	ppa_stranded_DN18949_c0_g2_i1	pco
OG0006894	WBGene00019272	ppa_stranded_DN24394_c0_g1_i2	pco
OG0010178	WBGene00022789	ppa_stranded_DN14532_c0_g1_i1	pco
OG0004655	WBGene00219436	ppa_stranded_DN21445_c0_g1_i1	pco
OG0006384	WBGene00006948	ppa_stranded_DN11460_c0_g1_i1	pco
OG0005607	WBGene00009155	PPA38197	pco
OG0008541	WBGene00044796	PPA37405	pco
OG0009885	WBGene00000893	PPA12976	pco
OG0005595	WBGene00017807	ppa_stranded_DN28120_c0_g2_i3	pco
OG0007947	WBGene00011572	PPA45949	pco
OG0009173	WBGene00012939	PPA02940	pco
OG0006960	WBGene00019318	ppa_stranded_DN23456_c0_g1_i2	pco
OG0003360	WBGene00015169	PPA20080	pco
OG0003480	WBGene00007229	PPA32960	pco
OG0004263	WBGene00007891	PPA33153	pco
OG0003646	WBGene00015544	PPA25486	pco
OG0004783	WBGene00002983	PPA00229	pco
OG0004950	WBGene00004115	PPA32116	pco
OG0004324	WBGene00007938	PPA00266	pco
OG0008176	WBGene00020560	PPA00582	pco
OG0008738	WBGene00004210	PPA38856	pco
OG0008924	WBGene00012545	ppa_stranded_DN26594_c0_g1_i1	pco
OG0005457	WBGene00017666	ppa_stranded_DN22493_c0_g2_i1	pco
OG0006354	WBGene00018656	ppa_stranded_DN21472_c0_g1_i1	pco
OG0005495	WBGene00017716	PPA10264	pco
OG0009575	WBGene00022024	PPA20301	pco
OG0009533	WBGene00013352	Iso_D.987.1	pco
OG0003728	WBGene00015622	ppa_stranded_DN20710_c0_g1_i4	pco
OG0009962	WBGene00014178	ppa_stranded_DN25420_c0_g3_i2	pco
OG0008188	WBGene00020571	PPA42325	pco
OG0005315	WBGene00008807	PPA32072	pco
OG0005925	WBGene00000611	ppa_stranded_DN29593_c1_g6_i1	pco
OG0008847	WBGene00021213	PPA26009	pco
OG0005623	WBGene00017835	PPA37717	pco
OG0010055	WBGene00013960	PPA30749	pco
OG0004922	WBGene00004259	PPA05148	pco
OG0003807	WBGene00007530	ppa_stranded_DN13338_c0_g1_i1	pco
OG0007439	WBGene00019839	PPA29248	pco
OG0009585	WBGene00001725	PPA39587	pco
OG0010019	WBGene00004398	isopolya.2830.1	pco
OG0007052	WBGene00010594	ppa_stranded_DN12272_c0_g1_i1	pco
OG0008312	WBGene00011952	PPA38587	pco
OG0004308	WBGene00000687	ppa_stranded_DN24622_c0_g1_i1	pco
OG0008184	WBGene00020567	ppa_stranded_DN31502_c4_g2_i3	pco
OG0009174	WBGene00001077	PPA06275	pco
OG0006242	WBGene00018487	PPA08418	pco
OG0008395	WBGene00012034	PPA18390	pco
OG0003402	WBGene00015216	PPA40325	pco
OG0005858	WBGene00009371	ppa_stranded_DN26598_c0_g2_i1	pco
OG0005146	WBGene00017307	PPA38447	pco
OG0004236	WBGene00016319	ppa_stranded_DN29402_c1_g1_i5	pco
OG0005815	WBGene00017991	PPA07550	pco
OG0004989	WBGene00008482	PPA35556	pco
OG0008466	WBGene00012144	ppa_stranded_DN30676_c1_g1_i3	pco
OG0007799	WBGene00000776	PPA09701	pco
OG0009487	WBGene00013263	ppa_stranded_DN26025_c0_g1_i1	pco
OG0006627	WBGene00018969	ppa_stranded_DN30392_c0_g1_i2	pco
OG0005079	WBGene00000397	PPA08912	pco
OG0006648	WBGene00000493	ppa_stranded_DN29830_c0_g1_i1	pco
OG0005183	WBGene00017351	PPA16230	pco
OG0003446	WBGene00005017	ppa_stranded_DN26019_c0_g1_i1	pco
OG0004673	WBGene00000644	PPA39113	pco
OG0003437	WBGene00007210	ppa_stranded_DN25852_c0_g1_i1	pco
OG0006462	WBGene00010008	PPA17460	pco
OG0008368	WBGene00020801	PPA07913	pco
OG0007858	WBGene00020224	ppa_stranded_DN25707_c1_g1_i2	pco
OG0008467	WBGene00020908	PPA29068	pco
OG0004777	WBGene00008314	PPA33794	pco
OG0007154	WBGene00010698	ppa_stranded_DN21740_c0_g1_i2	pco
OG0004763	WBGene00006310	PPA23475	pco
OG0009554	WBGene00022018	PPA18213	pco
OG0003391	WBGene00005016	PPA13966	pco
OG0008595	WBGene00021052	ppa_stranded_DN27723_c0_g2_i2	pco
OG0007098	WBGene00003497	PPA02602	pco
OG0007913	WBGene00020281	PPA27843	pco
OG0010023	WBGene00014245	PPA19265	pco
OG0006922	WBGene00010457	ppa_stranded_DN29785_c0_g1_i1	pco
OG0004520	WBGene00008089	PPA24534	pco
OG0004124	WBGene00001055	PPA18737	pco
OG0005049	WBGene00008545	UMM-S387-1.66-mRNA-1_frag	pco
OG0009339	WBGene00013169	PPA35393	pco
OG0004880	WBGene00000778	PPA18495	pco
OG0005502	WBGene00009081	PPA33516	pco
OG0006376	WBGene00004127	PPA00073	pco
OG0003550	WBGene00015426	PPA01929	pco
OG0005541	WBGene00017775	PPA11033	pco
OG0006681	WBGene00003554	ppa_stranded_DN29676_c0_g1_i1	pco
OG0004903	WBGene00000731	PPA37810	pco
OG0003501	WBGene00015336	PPA04337	pco
OG0003783	WBGene00000979	ppa_stranded_DN24768_c0_g1_i2	pco
OG0005293	WBGene00017430	PPA20236	pco
OG0007962	WBGene00011590	PPA18955	pco
OG0003381	WBGene00007178	ppa_stranded_DN27170_c0_g3_i2	pco
OG0007665	WBGene00020049	PPA19760	pco
OG0004724	WBGene00008260	ppa_stranded_DN4033_c0_g1_i1	pco
OG0009771	WBGene00022283	PPA35137	pco
OG0004411	WBGene00007996	PPA18496	pco
OG0005881	WBGene00004122	PPA04747	pco
OG0005376	WBGene00008929	PPA45375	pco
OG0006608	WBGene00018937	PPA37106	pco
OG0007876	WBGene00003887	PPA15179	pco
OG0004787	WBGene00044019	PPA13487	pco
OG0008885	WBGene00021309	PPA29019	pco
OG0006211	WBGene00000255	PPA20410	pco
OG0004750	WBGene00004221	PPA35363	pco
OG0005039	WBGene00008521	ppa_stranded_DN28890_c0_g1_i3	pco
OG0003491	WBGene00000082	PPA24968	pco
OG0004412	WBGene00007999	ppa_stranded_DN23292_c0_g2_i1	pco
OG0005339	WBGene00017483	ppa_stranded_DN23820_c0_g1_i2	pco
OG0009076	WBGene00045146	PPA30323	pco
OG0008624	WBGene00021075	PPA40273	pco
OG0009397	WBGene00001410	ppa_stranded_DN27137_c0_g1_i2	pco
OG0003864	WBGene00002024	PPA28727	pco
OG0010138	WBGene00022782	ppa_stranded_DN15378_c0_g1_i2	pco
OG0004064	WBGene00016106	PPA00162	pco
OG0005440	WBGene00008993	PPA12597	pco
OG0005778	WBGene00017968	PPA35466	pco
OG0009277	WBGene00021740	PPA09898	pco
OG0005651	WBGene00001067	Iso_D.13304.2	pco
OG0005093	WBGene00000422	PPA20586	pco
OG0009929	WBGene00013895	PPA01258	pco
OG0008258	WBGene00001079	PPA06061	pco
OG0008295	WBGene00020720	PPA12940	pco
OG0007978	WBGene00006589	ppa_stranded_DN29727_c0_g2_i1	pco
OG0005069	WBGene00017218	ppa_stranded_DN28944_c0_g1_i3	pco
OG0010166	WBGene00014039	ppa_stranded_DN20414_c0_g1_i4	pco
OG0008504	WBGene00004156	ppa_stranded_DN27024_c1_g1_i2	pco
OG0004588	WBGene00008132	PPA40163	pco
OG0004242	WBGene00002980	PPA30846	pco
OG0008117	WBGene00011767	ppa_stranded_DN23221_c0_g1_i2	pco
OG0003879	WBGene00015789	ppa_stranded_DN29807_c0_g1_i1	pco
OG0005978	WBGene00002050	ppa_stranded_DN30207_c2_g3_i1	pco
OG0004276	WBGene00007904	PPA23297	pco
OG0010228	WBGene00014108	ppa_stranded_DN15601_c0_g1_i1	pco
OG0006056	WBGene00018249	PPA04576	pco
OG0006994	WBGene00019361	ppa_stranded_DN28675_c0_g1_i2	pco
OG0008063	WBGene00011723	ppa_stranded_DN28697_c2_g3_i1	pco
OG0007308	WBGene00000175	PPA03108	pco
OG0008582	WBGene00012279	ppa_stranded_DN20323_c0_g1_i2	pco
OG0003824	WBGene00007549	ppa_stranded_DN30473_c0_g1_i1	pco
OG0004530	WBGene00002267	ppa_stranded_DN27581_c0_g2_i1	pco
OG0008750	WBGene00022455	ppa_stranded_DN15720_c0_g1_i1	pco
OG0006419	WBGene00006641	PPA19574	pco
OG0009970	WBGene00014206	PPA19990	pco
OG0009630	WBGene00044468	ppa_stranded_DN17644_c0_g1_i1	pco
OG0004402	WBGene00016509	ppa_stranded_DN27686_c0_g2_i1	pco
OG0005880	WBGene00018051	PPA35560	pco
OG0008017	WBGene00020397	ppa_stranded_DN23583_c0_g2_i1	pco
OG0006064	WBGene00018274	ppa_stranded_DN21861_c0_g1_i1	pco
OG0004904	WBGene00001241	PPA07280	pco
OG0007638	WBGene00001578	ppa_stranded_DN28328_c1_g1_i1	pco
OG0008259	WBGene00020672	PPA18717	pco
OG0003363	WBGene00015172	ppa_stranded_DN25403_c0_g2_i2	pco
OG0009592	WBGene00013439	ppa_stranded_DN21993_c0_g1_i1	pco
OG0010094	WBGene00000040	PPA18699	pco
OG0004363	WBGene00007969	PPA02505	pco
OG0008965	WBGene00000480	ppa_stranded_DN18041_c0_g1_i1	pco
OG0009176	WBGene00012940	ppa_stranded_DN25177_c0_g1_i1	pco
OG0006961	WBGene00019320	ppa_stranded_DN27343_c0_g1_i1	pco
OG0006142	WBGene00009653	ppa_stranded_DN31353_c0_g1_i1	pco
OG0009181	WBGene00012943	PPA00848	pco
OG0005200	WBGene00006626	ppa_stranded_DN48251_c0_g1_i1	pco
OG0009102	WBGene00012803	ppa_stranded_DN13533_c0_g1_i1	pco
OG0006435	WBGene00009980	ppa_stranded_DN18338_c0_g1_i1	pco
OG0008377	WBGene00004270	PPA06925	pco
OG0009183	WBGene00021628	ppa_stranded_DN17823_c0_g4_i1	pco
OG0007846	WBGene00011449	PPA34553	pco
OG0007277	WBGene00006461	PPA31641	pco
OG0005603	WBGene00002073	PPA35894	pco
OG0007710	WBGene00011307	ppa_stranded_DN25744_c0_g1_i2	pco
OG0006490	WBGene00010040	ppa_stranded_DN23115_c0_g1_i1	pco
OG0005732	WBGene00017931	PPA16908	pco
OG0007302	WBGene00010827	PPA01824	pco
OG0008172	WBGene00020556	ppa_stranded_DN31595_c6_g11_i2	pco
OG0003587	WBGene00003214	ppa_stranded_DN4268_c0_g1_i1	pco
OG0005471	WBGene00017687	PPA45303	pco
OG0004060	WBGene00016101	PPA41866	pco
OG0006171	WBGene00009678	PPA04163	pco
OG0006125	WBGene00018370	ppa_stranded_DN20961_c1_g1_i1	pco
OG0005480	WBGene00001078	PPA20006	pco
OG0009675	WBGene00022122	PPA31606	pco
OG0006447	WBGene00001479	PPA41882	pco
OG0003644	WBGene00189995	ppa_stranded_DN20690_c0_g1_i1	pco
OG0010220	WBGene00014097	PPA39233	pco
OG0004564	WBGene00016704	PPA20307	pco
OG0009542	WBGene00043064	PPA02182	pco
OG0009098	WBGene00012791	PPA38753	pco
OG0005643	WBGene00009177	PPA01098	pco
OG0005180	WBGene00017339	PPA19582	pco
OG0003870	WBGene00007593	PPA06841	pco
OG0008002	WBGene00020378	ppa_stranded_DN29120_c0_g1_i2	pco
OG0006148	WBGene00018393	ppa_stranded_DN25717_c0_g2_i1	pco
OG0009495	WBGene00044612	PPA42155	pco
OG0005118	WBGene00001331	PPA18725	pco
OG0003578	WBGene00015464	PPA25581	pco
OG0005075	WBGene00008571	PPA18760	pco
OG0007425	WBGene00023414	PPA18322	pco
OG0007845	WBGene00020215	ppa_stranded_DN25479_c0_g1_i1	pco
OG0009060	WBGene00012758	PPA22584	pco
OG0008611	WBGene00003048	ppa_stranded_DN27787_c1_g1_i1	pco
OG0004931	WBGene00001522	PPA08195	pco
OG0005299	WBGene00008780	ppa_stranded_DN30690_c0_g1_i3	pco
OG0009480	WBGene00013228	PPA19928	pco
OG0006537	WBGene00010075	ppa_stranded_DN29350_c0_g2_i3	pco
OG0008612	WBGene00012306	PPA09090	pco
OG0007829	WBGene00001329	PPA07519	pco
OG0005304	WBGene00017463	UMM-S2878-0.73-mRNA-1_f3	pco
OG0004514	WBGene00016641	PPA00405	pco
OG0008359	WBGene00004911	PPA37579	pco
OG0009424	WBGene00013207	PPA31131	pco
OG0008289	WBGene00020706	ppa_stranded_DN26396_c0_g2_i1	pco
OG0008760	WBGene00013737	ppa_stranded_DN23310_c0_g1_i2	pco
OG0005297	WBGene00017437	ppa_stranded_DN25248_c0_g2_i1	pco
OG0004960	WBGene00008448	ppa_stranded_DN25984_c0_g2_i2	pco
OG0006466	WBGene00018779	ppa_stranded_DN26425_c0_g2_i1	pco
OG0003759	WBGene00015650	PPA05799	pco
OG0009871	WBGene00003588	PPA09908	pco
OG0008043	WBGene00002039	PPA24994	pco
OG0003850	WBGene00015753	PPA36717	pco
OG0009693	WBGene00006702	ppa_stranded_DN18879_c0_g1_i1	pco
OG0006949	WBGene00010491	PPA40270	pco
OG0010251	WBGene00014164	ppa_stranded_DN24352_c0_g1_i1	pco
OG0004717	WBGene00005025	ppa_stranded_DN28297_c1_g1_i1	pco
OG0006977	WBGene00019346	ppa_stranded_DN25070_c0_g1_i1	pco
OG0007524	WBGene00011104	ppa_stranded_DN21329_c0_g1_i1	pco
OG0010164	WBGene00022786	PPA39808	pco
OG0005100	WBGene00017262	PPA02645	pco
OG0005637	WBGene00017838	PPA22818	pco
OG0008005	WBGene00011643	ppa_stranded_DN26399_c0_g1_i1	pco
OG0008915	WBGene00012554	isototal.3535.1	pco
OG0004581	WBGene00016725	Contig63-snapTAU.115	pco
OG0003868	WBGene00007591	ppa_stranded_DN20151_c0_g1_i1	pco
OG0005873	WBGene00003569	PPA06529	pco
OG0004666	WBGene00008228	ppa_stranded_DN23663_c0_g1_i2	pco
OG0007950	WBGene00003589	ppa_stranded_DN19112_c0_g2_i1	pco
OG0003809	WBGene00023500	PPA28689	pco
OG0009921	WBGene00022609	PPA24939	pco
OG0003880	WBGene00015791	ppa_stranded_DN8088_c0_g2_i1	pco
OG0007692	WBGene00006592	ppa_stranded_DN28225_c0_g1_i2	pco
OG0009550	WBGene00013366	ppa_stranded_DN22999_c0_g1_i1	pco
OG0005700	WBGene00017904	Iso_D.7900.2	pco
OG0005515	WBGene00017745	ppa_stranded_DN27221_c0_g2_i2	pco
OG0006974	WBGene00019344	PPA33543	pco
OG0007492	WBGene00019911	ppa_stranded_DN18993_c0_g2_i1	pco
