# Supplementary material for: Single worm transcriptomics identifies a developmental core network of oscillating genes with deep conservation across nematodes
Source: HighWire-hosted journal article supplement (doi:10.1101/gr.275303.121), 2021-07-22
Supplement: Supplemental_Table_S8.xlsx [file Supplemental_Table_S8.xlsx]

## Sheet: ppav3_pfam17664_HMManno_ssun
Supplemental Table S8 PFAM domain prediction in P. pacificus
pfam_id	ppa_locus	evalue_full_seq	Description
14-3-3|PF00244.21	ppa_stranded_DN29292_c0_g1_i1	1.2e-99	14-3-3
2-Hacid_dh|PF00389.31	PPA03076	1.3e-73	D-isomer
2-Hacid_dh|PF00389.31	PPA19589	1.7e-57	D-isomer
2-oxoacid_dh|PF00198.24	isototal.2590.3	2.8e-76	2-oxoacid
2-oxoacid_dh|PF00198.24	PPA33867	1.1e-77	2-oxoacid
2-oxoacid_dh|PF00198.24	PPA34725	5.5e-19	2-oxoacid
2-oxoacid_dh|PF00198.24	PPA38683	2e-57	2-oxoacid
2Fe-2S_thioredx|PF01257.20	ppa_stranded_DN7270_c0_g1_i1	7e-62	Thioredoxin-like
2OG-FeII_Oxy_2|PF13532.7	ppa_stranded_DN18837_c0_g1_i1	2.1e-33	2OG-Fe(II)
2OG-FeII_Oxy_2|PF13532.7	ppa_stranded_DN24831_c0_g2_i1	1.9e-19	2OG-Fe(II)
2OG-FeII_Oxy_2|PF13532.7	ppa_stranded_DN30098_c1_g1_i3	9e-11	2OG-Fe(II)
2OG-FeII_Oxy_2|PF13532.7	PPA02542	1.2e-08	2OG-Fe(II)
2OG-FeII_Oxy_2|PF13532.7	UMM-S10-23.12-mRNA-1_frag	9.4e-18	2OG-Fe(II)
2OG-FeII_Oxy_3|PF13640.7	ppa_stranded_DN12354_c0_g1_i1	1.4e-13	2OG-Fe(II)
2OG-FeII_Oxy_3|PF13640.7	ppa_stranded_DN21501_c0_g2_i1	1.6e-12	2OG-Fe(II)
2OG-FeII_Oxy_3|PF13640.7	PPA34606	0.005	2OG-Fe(II)
2OG-FeII_Oxy_3|PF13640.7	PPA34634	1.1e-18	2OG-Fe(II)
2OG-FeII_Oxy_3|PF13640.7	UMM-S245-17.78-mRNA-1_frag_1	5.1e-13	2OG-Fe(II)
2OG-FeII_Oxy_4|PF13661.7	PPA21850	8e-24	2OG-Fe(II)
2OG-FeII_Oxy|PF03171.21	ppa_stranded_DN29088_c3_g1_i1	1.3e-05	2OG-Fe(II)
3-HAO|PF06052.13	ppa_stranded_DN20263_c0_g1_i1	5.8e-64	3-hydroxyanthranilic
3Beta_HSD|PF01073.20	PPA01930	0.0008	3-beta
3Beta_HSD|PF01073.20	PPA10139	2.3e-42	3-beta
3HCDH_N|PF02737.19	ppa_stranded_DN48024_c0_g1_i1	4.5e-55	3-hydroxyacyl-CoA
3HCDH_N|PF02737.19	ppa_stranded_DN7638_c0_g1_i1	7.1e-61	3-hydroxyacyl-CoA
3HCDH_N|PF02737.19	PPA28348	3.4e-08	3-hydroxyacyl-CoA
3HCDH_N|PF02737.19	PPA31116	1.3e-36	3-hydroxyacyl-CoA
3HCDH_N|PF02737.19	PPA34684	8.3e-56	3-hydroxyacyl-CoA
40S_S4_C|PF16121.6	PPA33923	8e-10	40S
4F5|PF04419.15	PPA01586	1.5e-09	4F5
4F5|PF04419.15	PPA21103	1.1e-09	4F5
4HB_MCP_1|PF12729.8	PPA10870	0.0017	Four
4HBT_3|PF13622.7	Contig36-snapTAU.145	1.5e-53	Thioesterase-like
4HBT_3|PF13622.7	ppa_stranded_DN20631_c0_g1_i1	6.2e-22	Thioesterase-like
4HBT_3|PF13622.7	ppa_stranded_DN23760_c0_g1_i3	3.8e-52	Thioesterase-like
4HBT_3|PF13622.7	ppa_stranded_DN24745_c0_g2_i2	2.8e-17	Thioesterase-like
4HBT_3|PF13622.7	ppa_stranded_DN27710_c0_g1_i1	1.1e-55	Thioesterase-like
4HBT_3|PF13622.7	ppa_stranded_DN28166_c0_g2_i3	3.6e-54	Thioesterase-like
4HBT_3|PF13622.7	ppa_stranded_DN29832_c0_g1_i4	4.8e-20	Thioesterase-like
4HBT_3|PF13622.7	ppa_stranded_DN31674_c2_g4_i1	4.1e-44	Thioesterase-like
4HBT_3|PF13622.7	PPA10038	1.3e-13	Thioesterase-like
4HBT_3|PF13622.7	PPA14253	1.2e-55	Thioesterase-like
4HBT_3|PF13622.7	PPA16239	2.3e-55	Thioesterase-like
4HBT_3|PF13622.7	PPA37165	5.4e-56	Thioesterase-like
4HBT_3|PF13622.7	PPA40887	2.4e-22	Thioesterase-like
4HBT_3|PF13622.7	PPA41937	1.1e-34	Thioesterase-like
4HBT|PF03061.23	Iso_D.9690.1	2.9e-27	Thioesterase
4HBT|PF03061.23	ppa_stranded_DN20961_c1_g1_i1	5.8e-16	Thioesterase
4HBT|PF03061.23	ppa_stranded_DN22365_c0_g1_i1	6e-15	Thioesterase
4HBT|PF03061.23	PPA05072	2.3e-29	Thioesterase
5_nucleotid|PF05761.15	isopolya.8083.2	2.5e-161	5'
5_nucleotid|PF05761.15	PPA11714	1.9e-137	5'
5-FTHF_cyc-lig|PF01812.21	ppa_stranded_DN28181_c1_g1_i1	4.4e-37	5-formyltetrahydrofolate
60KD_IMP|PF02096.21	ppa_stranded_DN29700_c0_g1_i2	0.00041	60Kd
60KD_IMP|PF02096.21	ppa_stranded_DN31102_c0_g1_i1	3.2e-16	60Kd
6PF2K|PF01591.19	ppa_stranded_DN16532_c0_g1_i1	4.1e-90	6-phosphofructo-2-kinase
6PF2K|PF01591.19	ppa_stranded_DN26354_c0_g1_i1	2.8e-88	6-phosphofructo-2-kinase
6PGD|PF00393.20	ppa_stranded_DN27835_c0_g1_i1	7.6e-127	6-phosphogluconate
6PGD|PF00393.20	PPA04158	3.1e-65	6-phosphogluconate
6PGD|PF00393.20	PPA34264	7.1e-72	6-phosphogluconate
6PGD|PF00393.20	PPA35899	1.6e-70	6-phosphogluconate
6PGD|PF00393.20	PPA40706	1.1e-21	6-phosphogluconate
6PGD|PF00393.20	PPA41098	5.4e-43	6-phosphogluconate
6PGD|PF00393.20	PPA42490	2e-87	6-phosphogluconate
6PGD|PF00393.20	PPA46067	7.1e-29	6-phosphogluconate
7tm_1|PF00001.22	Contig0-snapTAU.718	3.5e-13	7
7tm_1|PF00001.22	Contig10-snap.216	5.5e-07	7
7tm_1|PF00001.22	Contig52-snap.119	0.0052	7
7tm_1|PF00001.22	Contig52-snap.120	4.1e-15	7
7tm_1|PF00001.22	Contig52-snapTAU.156	3.4e-31	7
7tm_1|PF00001.22	Iso_D.10812.1	2.9e-05	7
7tm_1|PF00001.22	ppa_stranded_DN10760_c0_g1_i1	3.9e-45	7
7tm_1|PF00001.22	ppa_stranded_DN16364_c0_g1_i1	1.3e-14	7
7tm_1|PF00001.22	ppa_stranded_DN18023_c0_g1_i1	1.3e-55	7
7tm_1|PF00001.22	ppa_stranded_DN18853_c0_g1_i1	1.8e-47	7
7tm_1|PF00001.22	ppa_stranded_DN19342_c0_g1_i1	0.0094	7
7tm_1|PF00001.22	ppa_stranded_DN23167_c0_g4_i1	3.2e-05	7
7tm_1|PF00001.22	ppa_stranded_DN23328_c0_g1_i1	1.8e-51	7
7tm_1|PF00001.22	ppa_stranded_DN24693_c0_g1_i3	0.00037	7
7tm_1|PF00001.22	ppa_stranded_DN26244_c0_g1_i3	9.8e-15	7
7tm_1|PF00001.22	ppa_stranded_DN26286_c0_g2_i3	0.00028	7
7tm_1|PF00001.22	ppa_stranded_DN26672_c0_g1_i2	7.7e-16	7
7tm_1|PF00001.22	ppa_stranded_DN26961_c0_g2_i1	1.7e-15	7
7tm_1|PF00001.22	ppa_stranded_DN27247_c0_g1_i2	2.5e-12	7
7tm_1|PF00001.22	ppa_stranded_DN27665_c0_g1_i8	2e-07	7
7tm_1|PF00001.22	ppa_stranded_DN27773_c0_g1_i1	7.2e-15	7
7tm_1|PF00001.22	ppa_stranded_DN28269_c2_g2_i1	3.4e-28	7
7tm_1|PF00001.22	ppa_stranded_DN28579_c0_g3_i1	1.9e-71	7
7tm_1|PF00001.22	ppa_stranded_DN28769_c0_g1_i2	6.5e-10	7
7tm_1|PF00001.22	ppa_stranded_DN28799_c0_g1_i3	6.8e-15	7
7tm_1|PF00001.22	ppa_stranded_DN29200_c0_g1_i1	1.8e-17	7
7tm_1|PF00001.22	ppa_stranded_DN29385_c0_g3_i3	2.5e-12	7
7tm_1|PF00001.22	ppa_stranded_DN29567_c0_g1_i1	9.8e-10	7
7tm_1|PF00001.22	ppa_stranded_DN29794_c0_g1_i1	2.5e-62	7
7tm_1|PF00001.22	ppa_stranded_DN29879_c0_g1_i1	2.2e-46	7
7tm_1|PF00001.22	ppa_stranded_DN30904_c0_g2_i10	3.8e-50	7
7tm_1|PF00001.22	ppa_stranded_DN30904_c0_g2_i13	5.1e-20	7
7tm_1|PF00001.22	ppa_stranded_DN32957_c0_g1_i1	8e-37	7
7tm_1|PF00001.22	ppa_stranded_DN35804_c0_g1_i1	0.00025	7
7tm_1|PF00001.22	PPA00122	2.2e-05	7
7tm_1|PF00001.22	PPA00153	1.5e-07	7
7tm_1|PF00001.22	PPA00294	1.1e-26	7
7tm_1|PF00001.22	PPA00365	0.00096	7
7tm_1|PF00001.22	PPA00437	4.3e-60	7
7tm_1|PF00001.22	PPA00440	7.5e-41	7
7tm_1|PF00001.22	PPA01907	1.9e-24	7
7tm_1|PF00001.22	PPA03207	1.5e-13	7
7tm_1|PF00001.22	PPA03748	8.1e-14	7
7tm_1|PF00001.22	PPA03842	2.8e-08	7
7tm_1|PF00001.22	PPA03851	1.8e-07	7
7tm_1|PF00001.22	PPA03959	1.1e-12	7
7tm_1|PF00001.22	PPA04879	9.3e-13	7
7tm_1|PF00001.22	PPA05312	2.1e-46	7
7tm_1|PF00001.22	PPA06164	0.00056	7
7tm_1|PF00001.22	PPA06278	9.3e-33	7
7tm_1|PF00001.22	PPA06753	4.9e-18	7
7tm_1|PF00001.22	PPA06832	1.1e-72	7
7tm_1|PF00001.22	PPA06949	9.4e-08	7
7tm_1|PF00001.22	PPA07498	3.7e-46	7
7tm_1|PF00001.22	PPA07597	8.4e-50	7
7tm_1|PF00001.22	PPA07900	1.6e-46	7
7tm_1|PF00001.22	PPA07953	9.9e-06	7
7tm_1|PF00001.22	PPA08312	3.4e-17	7
7tm_1|PF00001.22	PPA08484	5.4e-57	7
7tm_1|PF00001.22	PPA08737	1.5e-29	7
7tm_1|PF00001.22	PPA09152	5.9e-13	7
7tm_1|PF00001.22	PPA09715	3.8e-51	7
7tm_1|PF00001.22	PPA10461	1.3e-38	7
7tm_1|PF00001.22	PPA11665	1.7e-07	7
7tm_1|PF00001.22	PPA12252	2e-28	7
7tm_1|PF00001.22	PPA12256	1.4e-06	7
7tm_1|PF00001.22	PPA12274	5e-20	7
7tm_1|PF00001.22	PPA12300	1.4e-21	7
7tm_1|PF00001.22	PPA12301	1.9e-31	7
7tm_1|PF00001.22	PPA12758	7.7e-09	7
7tm_1|PF00001.22	PPA13927	4.2e-43	7
7tm_1|PF00001.22	PPA14003	6.5e-42	7
7tm_1|PF00001.22	PPA14209	6.9e-07	7
7tm_1|PF00001.22	PPA14216	4.5e-14	7
7tm_1|PF00001.22	PPA14349	2.2e-66	7
7tm_1|PF00001.22	PPA14598	3.7e-10	7
7tm_1|PF00001.22	PPA14600	2.3e-49	7
7tm_1|PF00001.22	PPA15726	0.00058	7
7tm_1|PF00001.22	PPA15769	0.008	7
7tm_1|PF00001.22	PPA15885	1.8e-14	7
7tm_1|PF00001.22	PPA15952	7.2e-19	7
7tm_1|PF00001.22	PPA16907	0.00021	7
7tm_1|PF00001.22	PPA17490	3.8e-17	7
7tm_1|PF00001.22	PPA17530	6.4e-13	7
7tm_1|PF00001.22	PPA17567	2e-34	7
7tm_1|PF00001.22	PPA17766	1.9e-33	7
7tm_1|PF00001.22	PPA17878	1.4e-11	7
7tm_1|PF00001.22	PPA18059	2.1e-13	7
7tm_1|PF00001.22	PPA18124	2.4e-18	7
7tm_1|PF00001.22	PPA19253	4e-16	7
7tm_1|PF00001.22	PPA19984	6.7e-17	7
7tm_1|PF00001.22	PPA20140	0.00038	7
7tm_1|PF00001.22	PPA20344	6.2e-32	7
7tm_1|PF00001.22	PPA20566	1.9e-73	7
7tm_1|PF00001.22	PPA20627	5.8e-71	7
7tm_1|PF00001.22	PPA20652	1.1e-33	7
7tm_1|PF00001.22	PPA21852	1.2e-14	7
7tm_1|PF00001.22	PPA21993	5.6e-12	7
7tm_1|PF00001.22	PPA22992	1.3e-70	7
7tm_1|PF00001.22	PPA23517	1.4e-10	7
7tm_1|PF00001.22	PPA23690	2.4e-40	7
7tm_1|PF00001.22	PPA23953	1.3e-13	7
7tm_1|PF00001.22	PPA23967	2.5e-07	7
7tm_1|PF00001.22	PPA24381	1.6e-52	7
7tm_1|PF00001.22	PPA25708	2.5e-13	7
7tm_1|PF00001.22	PPA25776	2.5e-06	7
7tm_1|PF00001.22	PPA26287	6.7e-35	7
7tm_1|PF00001.22	PPA26426	4.3e-44	7
7tm_1|PF00001.22	PPA27191	4.7e-07	7
7tm_1|PF00001.22	PPA27426	8.7e-11	7
7tm_1|PF00001.22	PPA27446	1e-43	7
7tm_1|PF00001.22	PPA28212	1.1e-27	7
7tm_1|PF00001.22	PPA29018	3.9e-71	7
7tm_1|PF00001.22	PPA29332	0.00017	7
7tm_1|PF00001.22	PPA29480	3.9e-10	7
7tm_1|PF00001.22	PPA29569	5.3e-13	7
7tm_1|PF00001.22	PPA30445	5.2e-47	7
7tm_1|PF00001.22	PPA30811	6.9e-06	7
7tm_1|PF00001.22	PPA30850	1.4e-38	7
7tm_1|PF00001.22	PPA31243	1.1e-26	7
7tm_1|PF00001.22	PPA32242	6.3e-56	7
7tm_1|PF00001.22	PPA33321	6.6e-06	7
7tm_1|PF00001.22	PPA33743	4.9e-12	7
7tm_1|PF00001.22	PPA33829	7e-09	7
7tm_1|PF00001.22	PPA34807	1.2e-09	7
7tm_1|PF00001.22	PPA35013	3.1e-32	7
7tm_1|PF00001.22	PPA36113	5.4e-18	7
7tm_1|PF00001.22	PPA36767	6e-05	7
7tm_1|PF00001.22	PPA36922	5e-08	7
7tm_1|PF00001.22	PPA37709	0.001	7
7tm_1|PF00001.22	PPA37833	1.9e-09	7
7tm_1|PF00001.22	PPA38376	1.4e-06	7
7tm_1|PF00001.22	PPA38452	1.8e-40	7
7tm_1|PF00001.22	PPA38517	7e-45	7
7tm_1|PF00001.22	PPA38628	4.5e-19	7
7tm_1|PF00001.22	PPA38647	7.3e-36	7
7tm_1|PF00001.22	PPA38715	7.9e-18	7
7tm_1|PF00001.22	PPA38752	1e-32	7
7tm_1|PF00001.22	PPA38881	7.5e-05	7
7tm_1|PF00001.22	PPA38899	1.3e-74	7
7tm_1|PF00001.22	PPA39215	4e-08	7
7tm_1|PF00001.22	PPA39306	4.9e-13	7
7tm_1|PF00001.22	PPA39457	6.6e-06	7
7tm_1|PF00001.22	PPA39471	1.5e-63	7
7tm_1|PF00001.22	PPA39676	1.9e-37	7
7tm_1|PF00001.22	PPA39852	3.5e-23	7
7tm_1|PF00001.22	PPA39987	6.6e-37	7
7tm_1|PF00001.22	PPA40072	2e-28	7
7tm_1|PF00001.22	PPA40133	6.1e-34	7
7tm_1|PF00001.22	PPA40227	2.8e-18	7
7tm_1|PF00001.22	PPA40336	0.00059	7
7tm_1|PF00001.22	PPA40352	4.8e-80	7
7tm_1|PF00001.22	PPA40584	1.3e-15	7
7tm_1|PF00001.22	PPA41849	8.2e-18	7
7tm_1|PF00001.22	PPA41861	6.2e-07	7
7tm_1|PF00001.22	PPA42337	2e-43	7
7tm_1|PF00001.22	PPA42905	1.9e-06	7
7tm_1|PF00001.22	PPA43504	1.6e-16	7
7tm_1|PF00001.22	UMM-S2845-12.36-mRNA-1_frag	2.2e-75	7
7tm_1|PF00001.22	UMM-S2857-5.15-mRNA-1_frag	1.5e-13	7
7tm_2|PF00002.25	Contig61-snapTAU.23	1.9e-07	7
7tm_2|PF00002.25	ppa_stranded_DN28433_c0_g1_i4	1.1e-58	7
7tm_2|PF00002.25	PPA02324	4.1e-36	7
7tm_2|PF00002.25	PPA18698	2e-44	7
7tm_2|PF00002.25	PPA19772	3.7e-52	7
7tm_2|PF00002.25	PPA22726	1.3e-41	7
7tm_3|PF00003.23	ppa_stranded_DN21978_c0_g1_i1	6.3e-36	7
7tm_3|PF00003.23	ppa_stranded_DN31194_c0_g2_i10	5.9e-17	7
7tm_3|PF00003.23	PPA11545	3.6e-53	7
7tm_3|PF00003.23	PPA23091	2.7e-17	7
7tm_3|PF00003.23	PPA26075	0.0057	7
7tm_6|PF02949.21	PPA01115	0.0017	7tm
7tm_7|PF08395.13	Contig12-snapTAU.108	2e-06	7tm
7tm_7|PF08395.13	Contig60-snapTAU.64	1.4e-05	7tm
7tm_7|PF08395.13	Iso_D.9973.1	4.3e-05	7tm
7tm_7|PF08395.13	Iso_D.9974.1	2.6e-05	7tm
7tm_7|PF08395.13	PPA24244	2.2e-05	7tm
7tm_7|PF08395.13	PPA39271	4.2e-14	7tm
7TM_GPCR_Sra|PF02117.17	PPA08463	8.8e-14	Serpentine
7TM_GPCR_Sra|PF02117.17	PPA27166	3.5e-13	Serpentine
7TM_GPCR_Sra|PF02117.17	PPA28472	1.1e-11	Serpentine
7TM_GPCR_Sra|PF02117.17	PPA30330	1.1e-11	Serpentine
7TM_GPCR_Sra|PF02117.17	PPA33510	6.2e-12	Serpentine
7TM_GPCR_Sra|PF02117.17	PPA37815	8.5e-11	Serpentine
7TM_GPCR_Sra|PF02117.17	PPA37828	6.3e-15	Serpentine
7TM_GPCR_Sra|PF02117.17	PPA42166	7.1e-15	Serpentine
7TM_GPCR_Sra|PF02117.17	PPA44998	7.6e-05	Serpentine
7TM_GPCR_Srab|PF10292.10	Contig40-snapTAU.204	3.3e-13	Serpentine
7TM_GPCR_Srab|PF10292.10	Contig41-snapTAU.68	4.2e-08	Serpentine
7TM_GPCR_Srab|PF10292.10	ppa_stranded_DN15223_c0_g1_i1	6.2e-07	Serpentine
7TM_GPCR_Srab|PF10292.10	ppa_stranded_DN21150_c0_g1_i2	3e-21	Serpentine
7TM_GPCR_Srab|PF10292.10	ppa_stranded_DN31550_c1_g5_i1	0.00049	Serpentine
7TM_GPCR_Srab|PF10292.10	ppa_stranded_DN32775_c0_g1_i1	3.1e-05	Serpentine
7TM_GPCR_Srab|PF10292.10	ppa_stranded_DN34074_c0_g1_i1	7.3e-15	Serpentine
7TM_GPCR_Srab|PF10292.10	ppa_stranded_DN49835_c0_g1_i1	0.00014	Serpentine
7TM_GPCR_Srab|PF10292.10	PPA01665	0.00043	Serpentine
7TM_GPCR_Srab|PF10292.10	PPA02044	2.5e-21	Serpentine
7TM_GPCR_Srab|PF10292.10	PPA03527	7.9e-48	Serpentine
7TM_GPCR_Srab|PF10292.10	PPA03781	4.1e-25	Serpentine
7TM_GPCR_Srab|PF10292.10	PPA10724	1.1e-12	Serpentine
7TM_GPCR_Srab|PF10292.10	PPA10734	2.2e-12	Serpentine
7TM_GPCR_Srab|PF10292.10	PPA13460	4.7e-13	Serpentine
7TM_GPCR_Srab|PF10292.10	PPA15617	3.2e-22	Serpentine
7TM_GPCR_Srab|PF10292.10	PPA17065	4.8e-20	Serpentine
7TM_GPCR_Srab|PF10292.10	PPA18067	1.3e-22	Serpentine
7TM_GPCR_Srab|PF10292.10	PPA18982	2.1e-37	Serpentine
7TM_GPCR_Srab|PF10292.10	PPA21773	5.7e-11	Serpentine
7TM_GPCR_Srab|PF10292.10	PPA23283	1.9e-23	Serpentine
7TM_GPCR_Srab|PF10292.10	PPA23966	2.3e-26	Serpentine
7TM_GPCR_Srab|PF10292.10	PPA25213	0.0012	Serpentine
7TM_GPCR_Srab|PF10292.10	PPA26141	8.3e-114	Serpentine
7TM_GPCR_Srab|PF10292.10	PPA26144	4.6e-24	Serpentine
7TM_GPCR_Srab|PF10292.10	PPA27615	1.7e-16	Serpentine
7TM_GPCR_Srab|PF10292.10	PPA29872	8.1e-44	Serpentine
7TM_GPCR_Srab|PF10292.10	PPA30553	0.00047	Serpentine
7TM_GPCR_Srab|PF10292.10	PPA33416	9.4e-14	Serpentine
7TM_GPCR_Srab|PF10292.10	PPA35922	2.6e-12	Serpentine
7TM_GPCR_Srab|PF10292.10	PPA36288	0.0006	Serpentine
7TM_GPCR_Srab|PF10292.10	PPA36763	1.8e-08	Serpentine
7TM_GPCR_Srab|PF10292.10	PPA37442	4.4e-35	Serpentine
7TM_GPCR_Srab|PF10292.10	PPA37443	9.9e-33	Serpentine
7TM_GPCR_Srab|PF10292.10	PPA37822	6.6e-07	Serpentine
7TM_GPCR_Srab|PF10292.10	PPA39267	8.2e-06	Serpentine
7TM_GPCR_Srab|PF10292.10	PPA40700	4.7e-14	Serpentine
7TM_GPCR_Srab|PF10292.10	PPA40708	3e-12	Serpentine
7TM_GPCR_Srab|PF10292.10	PPA40788	0.0012	Serpentine
7TM_GPCR_Srab|PF10292.10	PPA40851	9.3e-08	Serpentine
7TM_GPCR_Srab|PF10292.10	PPA40858	3e-40	Serpentine
7TM_GPCR_Srab|PF10292.10	PPA40859	2.6e-12	Serpentine
7TM_GPCR_Srab|PF10292.10	PPA40946	0.00015	Serpentine
7TM_GPCR_Srab|PF10292.10	PPA41012	4.3e-08	Serpentine
7TM_GPCR_Srab|PF10292.10	PPA41067	0.0064	Serpentine
7TM_GPCR_Srab|PF10292.10	PPA41171	2.2e-19	Serpentine
7TM_GPCR_Srab|PF10292.10	PPA41215	3.1e-18	Serpentine
7TM_GPCR_Srab|PF10292.10	PPA41216	7.5e-27	Serpentine
7TM_GPCR_Srab|PF10292.10	PPA41305	1.8e-31	Serpentine
7TM_GPCR_Srab|PF10292.10	PPA41455	7.2e-11	Serpentine
7TM_GPCR_Srab|PF10292.10	PPA41509	1.1e-18	Serpentine
7TM_GPCR_Srab|PF10292.10	PPA41746	4e-30	Serpentine
7TM_GPCR_Srab|PF10292.10	PPA41834	1.2e-13	Serpentine
7TM_GPCR_Srab|PF10292.10	PPA42237	1.2e-14	Serpentine
7TM_GPCR_Srab|PF10292.10	PPA42238	1.6e-85	Serpentine
7TM_GPCR_Srab|PF10292.10	PPA42247	3.9e-13	Serpentine
7TM_GPCR_Srab|PF10292.10	PPA42249	0.00071	Serpentine
7TM_GPCR_Srab|PF10292.10	PPA42413	3.8e-11	Serpentine
7TM_GPCR_Srab|PF10292.10	PPA42434	3.7e-12	Serpentine
7TM_GPCR_Srab|PF10292.10	PPA42442	2.8e-10	Serpentine
7TM_GPCR_Srab|PF10292.10	PPA42498	1.5e-05	Serpentine
7TM_GPCR_Srab|PF10292.10	PPA43472	1.7e-24	Serpentine
7TM_GPCR_Srb|PF02175.17	PPA12900	4.3e-16	Serpentine
7TM_GPCR_Srb|PF02175.17	PPA32096	0.0008	Serpentine
7TM_GPCR_Srb|PF02175.17	PPA41475	7.2e-06	Serpentine
7TM_GPCR_Srbc|PF10316.10	PPA07043	5.8e-11	Serpentine
7TM_GPCR_Srbc|PF10316.10	PPA08413	3e-06	Serpentine
7TM_GPCR_Srbc|PF10316.10	PPA10726	2.8e-05	Serpentine
7TM_GPCR_Srbc|PF10316.10	PPA25577	0.0002	Serpentine
7TM_GPCR_Srbc|PF10316.10	PPA31665	3.6e-09	Serpentine
7TM_GPCR_Srbc|PF10316.10	PPA40852	3e-09	Serpentine
7TM_GPCR_Srd|PF10317.10	Contig113-snapTAU.29	1.4e-12	Serpentine
7TM_GPCR_Srd|PF10317.10	Contig23-snapTAU.221	1.1e-39	Serpentine
7TM_GPCR_Srd|PF10317.10	Contig42-snapTAU.18	3.7e-09	Serpentine
7TM_GPCR_Srd|PF10317.10	Contig51-snapTAU.17	4.6e-31	Serpentine
7TM_GPCR_Srd|PF10317.10	Iso_D.9297.1	7.1e-35	Serpentine
7TM_GPCR_Srd|PF10317.10	ppa_stranded_DN10413_c0_g1_i1	8.8e-11	Serpentine
7TM_GPCR_Srd|PF10317.10	ppa_stranded_DN16721_c0_g1_i1	1.9e-24	Serpentine
7TM_GPCR_Srd|PF10317.10	ppa_stranded_DN23165_c0_g2_i1	9.3e-10	Serpentine
7TM_GPCR_Srd|PF10317.10	ppa_stranded_DN2628_c0_g2_i1	1.5e-13	Serpentine
7TM_GPCR_Srd|PF10317.10	ppa_stranded_DN31444_c0_g2_i16	4.9e-24	Serpentine
7TM_GPCR_Srd|PF10317.10	ppa_stranded_DN36456_c0_g1_i1	8.2e-06	Serpentine
7TM_GPCR_Srd|PF10317.10	ppa_stranded_DN48319_c0_g1_i1	1e-16	Serpentine
7TM_GPCR_Srd|PF10317.10	ppa_stranded_DN50124_c0_g1_i1	1.1e-15	Serpentine
7TM_GPCR_Srd|PF10317.10	ppa_stranded_DN9258_c0_g2_i1	6e-35	Serpentine
7TM_GPCR_Srd|PF10317.10	PPA01214	1.8e-44	Serpentine
7TM_GPCR_Srd|PF10317.10	PPA03651	2.3e-31	Serpentine
7TM_GPCR_Srd|PF10317.10	PPA03660	1.9e-15	Serpentine
7TM_GPCR_Srd|PF10317.10	PPA03721	3.3e-34	Serpentine
7TM_GPCR_Srd|PF10317.10	PPA03739	4.6e-36	Serpentine
7TM_GPCR_Srd|PF10317.10	PPA04414	1.5e-172	Serpentine
7TM_GPCR_Srd|PF10317.10	PPA04819	9.7e-45	Serpentine
7TM_GPCR_Srd|PF10317.10	PPA05521	4.3e-26	Serpentine
7TM_GPCR_Srd|PF10317.10	PPA05768	4.2e-23	Serpentine
7TM_GPCR_Srd|PF10317.10	PPA05867	2.5e-59	Serpentine
7TM_GPCR_Srd|PF10317.10	PPA06043	9.1e-38	Serpentine
7TM_GPCR_Srd|PF10317.10	PPA06622	5e-14	Serpentine
7TM_GPCR_Srd|PF10317.10	PPA06642	2.1e-10	Serpentine
7TM_GPCR_Srd|PF10317.10	PPA07198	3.7e-33	Serpentine
7TM_GPCR_Srd|PF10317.10	PPA08949	2.5e-32	Serpentine
7TM_GPCR_Srd|PF10317.10	PPA09606	3.1e-53	Serpentine
7TM_GPCR_Srd|PF10317.10	PPA09992	1.1e-34	Serpentine
7TM_GPCR_Srd|PF10317.10	PPA10454	6.5e-94	Serpentine
7TM_GPCR_Srd|PF10317.10	PPA10848	3.5e-09	Serpentine
7TM_GPCR_Srd|PF10317.10	PPA12221	1.3e-26	Serpentine
7TM_GPCR_Srd|PF10317.10	PPA12606	3.7e-36	Serpentine
7TM_GPCR_Srd|PF10317.10	PPA13042	6.6e-39	Serpentine
7TM_GPCR_Srd|PF10317.10	PPA13246	5.5e-17	Serpentine
7TM_GPCR_Srd|PF10317.10	PPA13467	4.5e-44	Serpentine
7TM_GPCR_Srd|PF10317.10	PPA13804	2e-23	Serpentine
7TM_GPCR_Srd|PF10317.10	PPA15491	5.4e-23	Serpentine
7TM_GPCR_Srd|PF10317.10	PPA15527	6.9e-30	Serpentine
7TM_GPCR_Srd|PF10317.10	PPA15539	1.5e-15	Serpentine
7TM_GPCR_Srd|PF10317.10	PPA15557	6.2e-38	Serpentine
7TM_GPCR_Srd|PF10317.10	PPA16352	9.4e-67	Serpentine
7TM_GPCR_Srd|PF10317.10	PPA16438	9.6e-45	Serpentine
7TM_GPCR_Srd|PF10317.10	PPA16579	4.1e-29	Serpentine
7TM_GPCR_Srd|PF10317.10	PPA18030	1.2e-22	Serpentine
7TM_GPCR_Srd|PF10317.10	PPA18410	1.2e-26	Serpentine
7TM_GPCR_Srd|PF10317.10	PPA19197	1.5e-25	Serpentine
7TM_GPCR_Srd|PF10317.10	PPA19237	7.1e-50	Serpentine
7TM_GPCR_Srd|PF10317.10	PPA19472	5.5e-43	Serpentine
7TM_GPCR_Srd|PF10317.10	PPA20729	4.2e-47	Serpentine
7TM_GPCR_Srd|PF10317.10	PPA20854	4.7e-45	Serpentine
7TM_GPCR_Srd|PF10317.10	PPA22080	3.2e-12	Serpentine
7TM_GPCR_Srd|PF10317.10	PPA22127	2.4e-53	Serpentine
7TM_GPCR_Srd|PF10317.10	PPA22155	0.0026	Serpentine
7TM_GPCR_Srd|PF10317.10	PPA22205	3e-34	Serpentine
7TM_GPCR_Srd|PF10317.10	PPA22343	1e-44	Serpentine
7TM_GPCR_Srd|PF10317.10	PPA22955	3.9e-67	Serpentine
7TM_GPCR_Srd|PF10317.10	PPA23167	4.8e-25	Serpentine
7TM_GPCR_Srd|PF10317.10	PPA23186	7.4e-24	Serpentine
7TM_GPCR_Srd|PF10317.10	PPA24271	2.2e-34	Serpentine
7TM_GPCR_Srd|PF10317.10	PPA24290	5.9e-56	Serpentine
7TM_GPCR_Srd|PF10317.10	PPA25104	1.7e-41	Serpentine
7TM_GPCR_Srd|PF10317.10	PPA27022	7.3e-18	Serpentine
7TM_GPCR_Srd|PF10317.10	PPA27032	9.8e-37	Serpentine
7TM_GPCR_Srd|PF10317.10	PPA27994	1.8e-31	Serpentine
7TM_GPCR_Srd|PF10317.10	PPA28423	1.4e-38	Serpentine
7TM_GPCR_Srd|PF10317.10	PPA29380	1.2e-271	Serpentine
7TM_GPCR_Srd|PF10317.10	PPA29435	6.7e-12	Serpentine
7TM_GPCR_Srd|PF10317.10	PPA29530	1.5e-37	Serpentine
7TM_GPCR_Srd|PF10317.10	PPA29585	1.9e-38	Serpentine
7TM_GPCR_Srd|PF10317.10	PPA29587	2.2e-27	Serpentine
7TM_GPCR_Srd|PF10317.10	PPA29701	5.7e-20	Serpentine
7TM_GPCR_Srd|PF10317.10	PPA29742	2.9e-46	Serpentine
7TM_GPCR_Srd|PF10317.10	PPA30186	1.3e-34	Serpentine
7TM_GPCR_Srd|PF10317.10	PPA30405	9.1e-06	Serpentine
7TM_GPCR_Srd|PF10317.10	PPA30985	2.4e-11	Serpentine
7TM_GPCR_Srd|PF10317.10	PPA31511	1.2e-09	Serpentine
7TM_GPCR_Srd|PF10317.10	PPA31664	1.6e-79	Serpentine
7TM_GPCR_Srd|PF10317.10	PPA31671	7.9e-08	Serpentine
7TM_GPCR_Srd|PF10317.10	PPA31941	2.7e-28	Serpentine
7TM_GPCR_Srd|PF10317.10	PPA32496	1.1e-70	Serpentine
7TM_GPCR_Srd|PF10317.10	PPA32540	4.4e-12	Serpentine
7TM_GPCR_Srd|PF10317.10	PPA32930	4e-31	Serpentine
7TM_GPCR_Srd|PF10317.10	PPA33006	6.4e-44	Serpentine
7TM_GPCR_Srd|PF10317.10	PPA33145	3.4e-70	Serpentine
7TM_GPCR_Srd|PF10317.10	PPA33284	2.4e-08	Serpentine
7TM_GPCR_Srd|PF10317.10	PPA33569	1.4e-11	Serpentine
7TM_GPCR_Srd|PF10317.10	PPA34221	8.1e-16	Serpentine
7TM_GPCR_Srd|PF10317.10	PPA34495	6.6e-37	Serpentine
7TM_GPCR_Srd|PF10317.10	PPA34649	4.7e-35	Serpentine
7TM_GPCR_Srd|PF10317.10	PPA34650	6.4e-32	Serpentine
7TM_GPCR_Srd|PF10317.10	PPA34689	2.6e-14	Serpentine
7TM_GPCR_Srd|PF10317.10	PPA34692	3.8e-36	Serpentine
7TM_GPCR_Srd|PF10317.10	PPA35053	1.6e-08	Serpentine
7TM_GPCR_Srd|PF10317.10	PPA35126	7.5e-78	Serpentine
7TM_GPCR_Srd|PF10317.10	PPA35133	1.5e-32	Serpentine
7TM_GPCR_Srd|PF10317.10	PPA35241	5.1e-32	Serpentine
7TM_GPCR_Srd|PF10317.10	PPA35409	4.5e-52	Serpentine
7TM_GPCR_Srd|PF10317.10	PPA35673	1.2e-15	Serpentine
7TM_GPCR_Srd|PF10317.10	PPA36112	3.5e-52	Serpentine
7TM_GPCR_Srd|PF10317.10	PPA36242	3.5e-128	Serpentine
7TM_GPCR_Srd|PF10317.10	PPA36484	4.6e-29	Serpentine
7TM_GPCR_Srd|PF10317.10	PPA36495	3.9e-16	Serpentine
7TM_GPCR_Srd|PF10317.10	PPA37839	4.2e-33	Serpentine
7TM_GPCR_Srd|PF10317.10	PPA37872	3.7e-32	Serpentine
7TM_GPCR_Srd|PF10317.10	PPA38800	5.6e-49	Serpentine
7TM_GPCR_Srd|PF10317.10	PPA39068	2.5e-31	Serpentine
7TM_GPCR_Srd|PF10317.10	PPA39177	1.3e-198	Serpentine
7TM_GPCR_Srd|PF10317.10	PPA40137	5.1e-28	Serpentine
7TM_GPCR_Srd|PF10317.10	PPA40375	7.8e-22	Serpentine
7TM_GPCR_Srd|PF10317.10	PPA40401	5.7e-90	Serpentine
7TM_GPCR_Srd|PF10317.10	PPA40405	1.3e-13	Serpentine
7TM_GPCR_Srd|PF10317.10	PPA40452	3e-09	Serpentine
7TM_GPCR_Srd|PF10317.10	PPA40507	8.1e-39	Serpentine
7TM_GPCR_Srd|PF10317.10	PPA40520	3e-11	Serpentine
7TM_GPCR_Srd|PF10317.10	PPA40521	1e-33	Serpentine
7TM_GPCR_Srd|PF10317.10	PPA40524	8.1e-06	Serpentine
7TM_GPCR_Srd|PF10317.10	PPA40526	2.8e-11	Serpentine
7TM_GPCR_Srd|PF10317.10	PPA40527	1.2e-18	Serpentine
7TM_GPCR_Srd|PF10317.10	PPA40539	4.5e-07	Serpentine
7TM_GPCR_Srd|PF10317.10	PPA40585	5.5e-13	Serpentine
7TM_GPCR_Srd|PF10317.10	PPA40586	4.8e-11	Serpentine
7TM_GPCR_Srd|PF10317.10	PPA40607	2.3e-06	Serpentine
7TM_GPCR_Srd|PF10317.10	PPA40667	5.4e-24	Serpentine
7TM_GPCR_Srd|PF10317.10	PPA40711	3.1e-49	Serpentine
7TM_GPCR_Srd|PF10317.10	PPA40714	4.3e-32	Serpentine
7TM_GPCR_Srd|PF10317.10	PPA40715	4.1e-16	Serpentine
7TM_GPCR_Srd|PF10317.10	PPA40716	0.00023	Serpentine
7TM_GPCR_Srd|PF10317.10	PPA40728	1.8e-06	Serpentine
7TM_GPCR_Srd|PF10317.10	PPA40732	6.3e-11	Serpentine
7TM_GPCR_Srd|PF10317.10	PPA40734	1.4e-18	Serpentine
7TM_GPCR_Srd|PF10317.10	PPA40746	0.0051	Serpentine
7TM_GPCR_Srd|PF10317.10	PPA40821	8e-21	Serpentine
7TM_GPCR_Srd|PF10317.10	PPA40825	5.8e-22	Serpentine
7TM_GPCR_Srd|PF10317.10	PPA40840	7.1e-34	Serpentine
7TM_GPCR_Srd|PF10317.10	PPA40841	3.5e-27	Serpentine
7TM_GPCR_Srd|PF10317.10	PPA40866	4.1e-29	Serpentine
7TM_GPCR_Srd|PF10317.10	PPA40868	2.1e-05	Serpentine
7TM_GPCR_Srd|PF10317.10	PPA40879	4.4e-20	Serpentine
7TM_GPCR_Srd|PF10317.10	PPA40880	1.7e-43	Serpentine
7TM_GPCR_Srd|PF10317.10	PPA40884	1.4e-28	Serpentine
7TM_GPCR_Srd|PF10317.10	PPA40894	2.2e-36	Serpentine
7TM_GPCR_Srd|PF10317.10	PPA40896	4.8e-20	Serpentine
7TM_GPCR_Srd|PF10317.10	PPA40902	8.7e-36	Serpentine
7TM_GPCR_Srd|PF10317.10	PPA40953	1.7e-09	Serpentine
7TM_GPCR_Srd|PF10317.10	PPA40975	4e-23	Serpentine
7TM_GPCR_Srd|PF10317.10	PPA40981	3.6e-11	Serpentine
7TM_GPCR_Srd|PF10317.10	PPA40992	3.8e-108	Serpentine
7TM_GPCR_Srd|PF10317.10	PPA40994	1.9e-32	Serpentine
7TM_GPCR_Srd|PF10317.10	PPA40996	3.7e-89	Serpentine
7TM_GPCR_Srd|PF10317.10	PPA41006	6.7e-09	Serpentine
7TM_GPCR_Srd|PF10317.10	PPA41019	3.1e-06	Serpentine
7TM_GPCR_Srd|PF10317.10	PPA41050	7.7e-12	Serpentine
7TM_GPCR_Srd|PF10317.10	PPA41051	2.4e-18	Serpentine
7TM_GPCR_Srd|PF10317.10	PPA41057	1.8e-13	Serpentine
7TM_GPCR_Srd|PF10317.10	PPA41075	1.6e-32	Serpentine
7TM_GPCR_Srd|PF10317.10	PPA41116	5.1e-05	Serpentine
7TM_GPCR_Srd|PF10317.10	PPA41173	1.2e-25	Serpentine
7TM_GPCR_Srd|PF10317.10	PPA41174	1.5e-34	Serpentine
7TM_GPCR_Srd|PF10317.10	PPA41175	1.3e-26	Serpentine
7TM_GPCR_Srd|PF10317.10	PPA41186	1.2e-45	Serpentine
7TM_GPCR_Srd|PF10317.10	PPA41188	1.1e-08	Serpentine
7TM_GPCR_Srd|PF10317.10	PPA41194	2.9e-21	Serpentine
7TM_GPCR_Srd|PF10317.10	PPA41230	1.5e-22	Serpentine
7TM_GPCR_Srd|PF10317.10	PPA41231	5.9e-06	Serpentine
7TM_GPCR_Srd|PF10317.10	PPA41233	1.1e-05	Serpentine
7TM_GPCR_Srd|PF10317.10	PPA41255	9.6e-44	Serpentine
7TM_GPCR_Srd|PF10317.10	PPA41280	3.4e-14	Serpentine
7TM_GPCR_Srd|PF10317.10	PPA41386	1.4e-34	Serpentine
7TM_GPCR_Srd|PF10317.10	PPA41391	2.3e-20	Serpentine
7TM_GPCR_Srd|PF10317.10	PPA41451	8.2e-11	Serpentine
7TM_GPCR_Srd|PF10317.10	PPA41458	2e-06	Serpentine
7TM_GPCR_Srd|PF10317.10	PPA41471	1.9e-37	Serpentine
7TM_GPCR_Srd|PF10317.10	PPA41476	4.9e-22	Serpentine
7TM_GPCR_Srd|PF10317.10	PPA41496	1.3e-09	Serpentine
7TM_GPCR_Srd|PF10317.10	PPA41521	1.3e-10	Serpentine
7TM_GPCR_Srd|PF10317.10	PPA41558	9.5e-15	Serpentine
7TM_GPCR_Srd|PF10317.10	PPA41593	6.7e-32	Serpentine
7TM_GPCR_Srd|PF10317.10	PPA41596	1.4e-46	Serpentine
7TM_GPCR_Srd|PF10317.10	PPA41622	6.3e-30	Serpentine
7TM_GPCR_Srd|PF10317.10	PPA41643	9.7e-28	Serpentine
7TM_GPCR_Srd|PF10317.10	PPA41656	3.4e-11	Serpentine
7TM_GPCR_Srd|PF10317.10	PPA41675	1.5e-24	Serpentine
7TM_GPCR_Srd|PF10317.10	PPA41721	5e-10	Serpentine
7TM_GPCR_Srd|PF10317.10	PPA41755	2.1e-10	Serpentine
7TM_GPCR_Srd|PF10317.10	PPA41758	2.8e-13	Serpentine
7TM_GPCR_Srd|PF10317.10	PPA41789	3.2e-26	Serpentine
7TM_GPCR_Srd|PF10317.10	PPA41793	9.1e-40	Serpentine
7TM_GPCR_Srd|PF10317.10	PPA41800	4e-42	Serpentine
7TM_GPCR_Srd|PF10317.10	PPA41815	4.9e-32	Serpentine
7TM_GPCR_Srd|PF10317.10	PPA41936	1.8e-39	Serpentine
7TM_GPCR_Srd|PF10317.10	PPA41959	1.3e-11	Serpentine
7TM_GPCR_Srd|PF10317.10	PPA42206	4.5e-32	Serpentine
7TM_GPCR_Srd|PF10317.10	PPA42216	6.9e-56	Serpentine
7TM_GPCR_Srd|PF10317.10	PPA42269	4.2e-24	Serpentine
7TM_GPCR_Srd|PF10317.10	PPA42280	5.1e-26	Serpentine
7TM_GPCR_Srd|PF10317.10	PPA42351	3.1e-16	Serpentine
7TM_GPCR_Srd|PF10317.10	PPA42367	2.2e-10	Serpentine
7TM_GPCR_Srd|PF10317.10	PPA42371	7.7e-08	Serpentine
7TM_GPCR_Srd|PF10317.10	PPA42381	2.2e-29	Serpentine
7TM_GPCR_Srd|PF10317.10	PPA42407	1.4e-24	Serpentine
7TM_GPCR_Srd|PF10317.10	PPA42445	2.6e-27	Serpentine
7TM_GPCR_Srd|PF10317.10	PPA42450	2.1e-27	Serpentine
7TM_GPCR_Srd|PF10317.10	PPA42456	2e-24	Serpentine
7TM_GPCR_Srd|PF10317.10	PPA42474	4.5e-19	Serpentine
7TM_GPCR_Srd|PF10317.10	PPA42681	2.4e-43	Serpentine
7TM_GPCR_Srd|PF10317.10	PPA42706	1.3e-16	Serpentine
7TM_GPCR_Srd|PF10317.10	PPA42891	0.003	Serpentine
7TM_GPCR_Srd|PF10317.10	PPA42935	2e-14	Serpentine
7TM_GPCR_Srd|PF10317.10	PPA42997	4.1e-07	Serpentine
7TM_GPCR_Srd|PF10317.10	PPA43036	1.4e-05	Serpentine
7TM_GPCR_Srd|PF10317.10	PPA43040	3.7e-26	Serpentine
7TM_GPCR_Srd|PF10317.10	PPA43178	2.3e-12	Serpentine
7TM_GPCR_Srd|PF10317.10	PPA43772	3.9e-09	Serpentine
7TM_GPCR_Srd|PF10317.10	PPA43773	2.9e-06	Serpentine
7TM_GPCR_Srd|PF10317.10	PPA45571	3.6e-23	Serpentine
7TM_GPCR_Srd|PF10317.10	PPA45608	2.5e-17	Serpentine
7TM_GPCR_Srd|PF10317.10	PPA45738	5.1e-08	Serpentine
7TM_GPCR_Srd|PF10317.10	PPA45795	4e-10	Serpentine
7TM_GPCR_Srd|PF10317.10	PPA45981	2.8e-17	Serpentine
7TM_GPCR_Srd|PF10317.10	PPA46266	5.1e-26	Serpentine
7TM_GPCR_Srd|PF10317.10	UMM-S2838-16.0-mRNA-1_frag	5.5e-51	Serpentine
7TM_GPCR_Srd|PF10317.10	UMM-S2838-38.31-mRNA-1_part0	5e-07	Serpentine
7TM_GPCR_Srd|PF10317.10	UMM-S2838-38.31-mRNA-1_part1	1.7e-25	Serpentine
7TM_GPCR_Srd|PF10317.10	UMM-S2840-7.40-mRNA-1_frag1	1.8e-91	Serpentine
7TM_GPCR_Srd|PF10317.10	UMM-S2840-77.39-mRNA-1_frag	5.8e-17	Serpentine
7TM_GPCR_Srd|PF10317.10	UMM-S7-30.53-mRNA-1_Frag_1	1.7e-22	Serpentine
7TM_GPCR_Srh|PF10318.10	Contig38-snapTAU.214	1.5e-15	Serpentine
7TM_GPCR_Srh|PF10318.10	Contig52-snapTAU.151	1.4e-08	Serpentine
7TM_GPCR_Srh|PF10318.10	Contig94-snapTAU.36	1.6e-05	Serpentine
7TM_GPCR_Srh|PF10318.10	Iso_D.9332.1	1.2e-34	Serpentine
7TM_GPCR_Srh|PF10318.10	ppa_stranded_DN19359_c0_g1_i1	2.4e-07	Serpentine
7TM_GPCR_Srh|PF10318.10	ppa_stranded_DN20310_c0_g1_i5	1.1e-13	Serpentine
7TM_GPCR_Srh|PF10318.10	ppa_stranded_DN24079_c0_g2_i2	6.3e-29	Serpentine
7TM_GPCR_Srh|PF10318.10	ppa_stranded_DN29488_c0_g2_i3	2.4e-10	Serpentine
7TM_GPCR_Srh|PF10318.10	ppa_stranded_DN30397_c0_g2_i4	3.8e-10	Serpentine
7TM_GPCR_Srh|PF10318.10	ppa_stranded_DN49443_c0_g1_i1	6e-08	Serpentine
7TM_GPCR_Srh|PF10318.10	PPA01296	9.6e-16	Serpentine
7TM_GPCR_Srh|PF10318.10	PPA03030	2.7e-28	Serpentine
7TM_GPCR_Srh|PF10318.10	PPA03680	5.8e-10	Serpentine
7TM_GPCR_Srh|PF10318.10	PPA03799	4e-23	Serpentine
7TM_GPCR_Srh|PF10318.10	PPA04566	2.7e-07	Serpentine
7TM_GPCR_Srh|PF10318.10	PPA04944	2.2e-05	Serpentine
7TM_GPCR_Srh|PF10318.10	PPA05865	2.1e-24	Serpentine
7TM_GPCR_Srh|PF10318.10	PPA05870	1.5e-22	Serpentine
7TM_GPCR_Srh|PF10318.10	PPA06624	1.3e-10	Serpentine
7TM_GPCR_Srh|PF10318.10	PPA06646	3.7e-11	Serpentine
7TM_GPCR_Srh|PF10318.10	PPA07160	0.00012	Serpentine
7TM_GPCR_Srh|PF10318.10	PPA07183	4.4e-18	Serpentine
7TM_GPCR_Srh|PF10318.10	PPA07314	7.9e-18	Serpentine
7TM_GPCR_Srh|PF10318.10	PPA07370	7.2e-10	Serpentine
7TM_GPCR_Srh|PF10318.10	PPA09075	4.6e-13	Serpentine
7TM_GPCR_Srh|PF10318.10	PPA09448	3.4e-08	Serpentine
7TM_GPCR_Srh|PF10318.10	PPA10447	0.00011	Serpentine
7TM_GPCR_Srh|PF10318.10	PPA10971	6.7e-06	Serpentine
7TM_GPCR_Srh|PF10318.10	PPA13328	1e-25	Serpentine
7TM_GPCR_Srh|PF10318.10	PPA15547	5e-10	Serpentine
7TM_GPCR_Srh|PF10318.10	PPA16130	4.6e-12	Serpentine
7TM_GPCR_Srh|PF10318.10	PPA16405	1e-21	Serpentine
7TM_GPCR_Srh|PF10318.10	PPA16441	2e-45	Serpentine
7TM_GPCR_Srh|PF10318.10	PPA16491	0.004	Serpentine
7TM_GPCR_Srh|PF10318.10	PPA16692	1.4e-08	Serpentine
7TM_GPCR_Srh|PF10318.10	PPA19079	0.00022	Serpentine
7TM_GPCR_Srh|PF10318.10	PPA20859	5.9e-18	Serpentine
7TM_GPCR_Srh|PF10318.10	PPA22032	9.5e-18	Serpentine
7TM_GPCR_Srh|PF10318.10	PPA23295	6.5e-14	Serpentine
7TM_GPCR_Srh|PF10318.10	PPA24368	2e-09	Serpentine
7TM_GPCR_Srh|PF10318.10	PPA24707	5.9e-12	Serpentine
7TM_GPCR_Srh|PF10318.10	PPA24779	2.8e-15	Serpentine
7TM_GPCR_Srh|PF10318.10	PPA25772	6e-11	Serpentine
7TM_GPCR_Srh|PF10318.10	PPA26707	1e-22	Serpentine
7TM_GPCR_Srh|PF10318.10	PPA29472	9.4e-08	Serpentine
7TM_GPCR_Srh|PF10318.10	PPA29628	1.4e-05	Serpentine
7TM_GPCR_Srh|PF10318.10	PPA30371	1.4e-15	Serpentine
7TM_GPCR_Srh|PF10318.10	PPA30808	1.9e-08	Serpentine
7TM_GPCR_Srh|PF10318.10	PPA30901	1.1e-12	Serpentine
7TM_GPCR_Srh|PF10318.10	PPA31121	1.6e-10	Serpentine
7TM_GPCR_Srh|PF10318.10	PPA31245	3.4e-20	Serpentine
7TM_GPCR_Srh|PF10318.10	PPA31951	3.7e-06	Serpentine
7TM_GPCR_Srh|PF10318.10	PPA33034	8.5e-11	Serpentine
7TM_GPCR_Srh|PF10318.10	PPA33556	1.2e-15	Serpentine
7TM_GPCR_Srh|PF10318.10	PPA34538	1.2e-22	Serpentine
7TM_GPCR_Srh|PF10318.10	PPA35116	7e-16	Serpentine
7TM_GPCR_Srh|PF10318.10	PPA35125	1.2e-13	Serpentine
7TM_GPCR_Srh|PF10318.10	PPA35176	3.1e-15	Serpentine
7TM_GPCR_Srh|PF10318.10	PPA35482	7.5e-15	Serpentine
7TM_GPCR_Srh|PF10318.10	PPA36036	0.00054	Serpentine
7TM_GPCR_Srh|PF10318.10	PPA36182	1.6e-37	Serpentine
7TM_GPCR_Srh|PF10318.10	PPA36458	1e-07	Serpentine
7TM_GPCR_Srh|PF10318.10	PPA36554	7.4e-10	Serpentine
7TM_GPCR_Srh|PF10318.10	PPA36555	3.2e-16	Serpentine
7TM_GPCR_Srh|PF10318.10	PPA36603	4.1e-15	Serpentine
7TM_GPCR_Srh|PF10318.10	PPA36856	3.2e-16	Serpentine
7TM_GPCR_Srh|PF10318.10	PPA37140	5e-16	Serpentine
7TM_GPCR_Srh|PF10318.10	PPA37255	0.0004	Serpentine
7TM_GPCR_Srh|PF10318.10	PPA37366	2e-30	Serpentine
7TM_GPCR_Srh|PF10318.10	PPA38529	7.8e-14	Serpentine
7TM_GPCR_Srh|PF10318.10	PPA38791	1.9e-09	Serpentine
7TM_GPCR_Srh|PF10318.10	PPA39076	5.6e-06	Serpentine
7TM_GPCR_Srh|PF10318.10	PPA39146	9.8e-12	Serpentine
7TM_GPCR_Srh|PF10318.10	PPA40007	1.4e-08	Serpentine
7TM_GPCR_Srh|PF10318.10	PPA40012	1.6e-21	Serpentine
7TM_GPCR_Srh|PF10318.10	PPA40016	4.5e-05	Serpentine
7TM_GPCR_Srh|PF10318.10	PPA40347	9.7e-26	Serpentine
7TM_GPCR_Srh|PF10318.10	PPA40351	4.1e-16	Serpentine
7TM_GPCR_Srh|PF10318.10	PPA40383	2.2e-13	Serpentine
7TM_GPCR_Srh|PF10318.10	PPA40399	6.2e-14	Serpentine
7TM_GPCR_Srh|PF10318.10	PPA40402	2.6e-07	Serpentine
7TM_GPCR_Srh|PF10318.10	PPA40422	3.1e-11	Serpentine
7TM_GPCR_Srh|PF10318.10	PPA40504	1.3e-08	Serpentine
7TM_GPCR_Srh|PF10318.10	PPA40533	9.3e-10	Serpentine
7TM_GPCR_Srh|PF10318.10	PPA40540	1.9e-11	Serpentine
7TM_GPCR_Srh|PF10318.10	PPA40553	3.1e-17	Serpentine
7TM_GPCR_Srh|PF10318.10	PPA40604	3.3e-08	Serpentine
7TM_GPCR_Srh|PF10318.10	PPA40639	1.4e-10	Serpentine
7TM_GPCR_Srh|PF10318.10	PPA40670	1.8e-11	Serpentine
7TM_GPCR_Srh|PF10318.10	PPA40681	1.5e-22	Serpentine
7TM_GPCR_Srh|PF10318.10	PPA40736	4.9e-09	Serpentine
7TM_GPCR_Srh|PF10318.10	PPA40770	7.8e-18	Serpentine
7TM_GPCR_Srh|PF10318.10	PPA40777	1.3e-22	Serpentine
7TM_GPCR_Srh|PF10318.10	PPA40799	5.5e-05	Serpentine
7TM_GPCR_Srh|PF10318.10	PPA40822	3.8e-10	Serpentine
7TM_GPCR_Srh|PF10318.10	PPA40829	8e-12	Serpentine
7TM_GPCR_Srh|PF10318.10	PPA40905	3.2e-08	Serpentine
7TM_GPCR_Srh|PF10318.10	PPA40920	0.0019	Serpentine
7TM_GPCR_Srh|PF10318.10	PPA40922	2.9e-11	Serpentine
7TM_GPCR_Srh|PF10318.10	PPA40929	2.4e-11	Serpentine
7TM_GPCR_Srh|PF10318.10	PPA40931	2.1e-10	Serpentine
7TM_GPCR_Srh|PF10318.10	PPA40936	6.2e-05	Serpentine
7TM_GPCR_Srh|PF10318.10	PPA40950	3.2e-15	Serpentine
7TM_GPCR_Srh|PF10318.10	PPA40954	2.1e-10	Serpentine
7TM_GPCR_Srh|PF10318.10	PPA40960	0.00013	Serpentine
7TM_GPCR_Srh|PF10318.10	PPA40969	1.8e-18	Serpentine
7TM_GPCR_Srh|PF10318.10	PPA40973	4.3e-05	Serpentine
7TM_GPCR_Srh|PF10318.10	PPA40997	1.2e-26	Serpentine
7TM_GPCR_Srh|PF10318.10	PPA41039	2.4e-06	Serpentine
7TM_GPCR_Srh|PF10318.10	PPA41117	2.4e-14	Serpentine
7TM_GPCR_Srh|PF10318.10	PPA41197	8.9e-07	Serpentine
7TM_GPCR_Srh|PF10318.10	PPA41202	2.4e-21	Serpentine
7TM_GPCR_Srh|PF10318.10	PPA41209	3.8e-06	Serpentine
7TM_GPCR_Srh|PF10318.10	PPA41211	0.00042	Serpentine
7TM_GPCR_Srh|PF10318.10	PPA41213	6.8e-10	Serpentine
7TM_GPCR_Srh|PF10318.10	PPA41214	9.7e-10	Serpentine
7TM_GPCR_Srh|PF10318.10	PPA41224	3.7e-09	Serpentine
7TM_GPCR_Srh|PF10318.10	PPA41235	1.1e-08	Serpentine
7TM_GPCR_Srh|PF10318.10	PPA41247	3.2e-05	Serpentine
7TM_GPCR_Srh|PF10318.10	PPA41303	1.2e-08	Serpentine
7TM_GPCR_Srh|PF10318.10	PPA41337	5.8e-07	Serpentine
7TM_GPCR_Srh|PF10318.10	PPA41340	2.8e-19	Serpentine
7TM_GPCR_Srh|PF10318.10	PPA41474	1.2e-06	Serpentine
7TM_GPCR_Srh|PF10318.10	PPA41499	0.0022	Serpentine
7TM_GPCR_Srh|PF10318.10	PPA41514	1.3e-08	Serpentine
7TM_GPCR_Srh|PF10318.10	PPA41528	3.3e-08	Serpentine
7TM_GPCR_Srh|PF10318.10	PPA41591	4.9e-19	Serpentine
7TM_GPCR_Srh|PF10318.10	PPA41624	7.5e-10	Serpentine
7TM_GPCR_Srh|PF10318.10	PPA41628	1.3e-06	Serpentine
7TM_GPCR_Srh|PF10318.10	PPA41631	9.1e-10	Serpentine
7TM_GPCR_Srh|PF10318.10	PPA41690	1.1e-11	Serpentine
7TM_GPCR_Srh|PF10318.10	PPA41702	6.4e-17	Serpentine
7TM_GPCR_Srh|PF10318.10	PPA41748	0.0025	Serpentine
7TM_GPCR_Srh|PF10318.10	PPA41766	3.3e-36	Serpentine
7TM_GPCR_Srh|PF10318.10	PPA41771	8.1e-08	Serpentine
7TM_GPCR_Srh|PF10318.10	PPA41773	2.4e-07	Serpentine
7TM_GPCR_Srh|PF10318.10	PPA41795	5.9e-33	Serpentine
7TM_GPCR_Srh|PF10318.10	PPA41797	0.00017	Serpentine
7TM_GPCR_Srh|PF10318.10	PPA42270	2.1e-10	Serpentine
7TM_GPCR_Srh|PF10318.10	PPA42497	3.9e-12	Serpentine
7TM_GPCR_Srh|PF10318.10	PPA42513	1.3e-07	Serpentine
7TM_GPCR_Srh|PF10318.10	PPA42721	5.8e-22	Serpentine
7TM_GPCR_Srh|PF10318.10	PPA42729	0.00048	Serpentine
7TM_GPCR_Srh|PF10318.10	PPA42739	1.6e-05	Serpentine
7TM_GPCR_Srh|PF10318.10	PPA42798	8e-28	Serpentine
7TM_GPCR_Srh|PF10318.10	PPA42994	4.6e-07	Serpentine
7TM_GPCR_Srh|PF10318.10	PPA43186	2.8e-06	Serpentine
7TM_GPCR_Srh|PF10318.10	PPA43340	5.8e-24	Serpentine
7TM_GPCR_Srh|PF10318.10	PPA43448	9.5e-23	Serpentine
7TM_GPCR_Srh|PF10318.10	PPA43733	3.1e-06	Serpentine
7TM_GPCR_Srh|PF10318.10	PPA45395	2.8e-06	Serpentine
7TM_GPCR_Srh|PF10318.10	PPA45516	9.6e-06	Serpentine
7TM_GPCR_Srh|PF10318.10	UMM-S2838-26.53-mRNA-1_frag_1	1.5e-28	Serpentine
7TM_GPCR_Srh|PF10318.10	UMM-S2838-26.53-mRNA-1_frag_2	1.2e-13	Serpentine
7TM_GPCR_Srh|PF10318.10	UMM-S2840-1.59-mRNA-1_4	0.0037	Serpentine
7TM_GPCR_Srh|PF10318.10	UMM-S2840-10.60-mRNA-1_frag_1	4.8e-11	Serpentine
7TM_GPCR_Srh|PF10318.10	UMM-S2840-92.50-mRNA-1_frag.1	1.2e-11	Serpentine
7TM_GPCR_Sri|PF10327.10	Contig38-snapTAU.213	5.9e-08	Serpentine
7TM_GPCR_Sri|PF10327.10	Iso_D.9009.1	4.9e-38	Serpentine
7TM_GPCR_Sri|PF10327.10	Iso_D.9039.1	6.3e-10	Serpentine
7TM_GPCR_Sri|PF10327.10	ppa_stranded_DN11386_c0_g1_i1	5e-15	Serpentine
7TM_GPCR_Sri|PF10327.10	ppa_stranded_DN19564_c0_g1_i1	0.002	Serpentine
7TM_GPCR_Sri|PF10327.10	ppa_stranded_DN20881_c0_g1_i2	1.3e-06	Serpentine
7TM_GPCR_Sri|PF10327.10	ppa_stranded_DN28721_c0_g3_i1	8.1e-18	Serpentine
7TM_GPCR_Sri|PF10327.10	ppa_stranded_DN29891_c0_g1_i1	1.7e-10	Serpentine
7TM_GPCR_Sri|PF10327.10	ppa_stranded_DN37921_c0_g1_i1	4.1e-10	Serpentine
7TM_GPCR_Sri|PF10327.10	ppa_stranded_DN49151_c0_g1_i1	2.2e-13	Serpentine
7TM_GPCR_Sri|PF10327.10	PPA02872	6.9e-36	Serpentine
7TM_GPCR_Sri|PF10327.10	PPA03357	3e-27	Serpentine
7TM_GPCR_Sri|PF10327.10	PPA03753	1.7e-06	Serpentine
7TM_GPCR_Sri|PF10327.10	PPA04323	2e-20	Serpentine
7TM_GPCR_Sri|PF10327.10	PPA04361	2.1e-15	Serpentine
7TM_GPCR_Sri|PF10327.10	PPA04569	8.2e-15	Serpentine
7TM_GPCR_Sri|PF10327.10	PPA06016	9.4e-22	Serpentine
7TM_GPCR_Sri|PF10327.10	PPA06654	6.2e-17	Serpentine
7TM_GPCR_Sri|PF10327.10	PPA07166	2.1e-30	Serpentine
7TM_GPCR_Sri|PF10327.10	PPA07168	0.00011	Serpentine
7TM_GPCR_Sri|PF10327.10	PPA08648	2.5e-10	Serpentine
7TM_GPCR_Sri|PF10327.10	PPA14993	2.7e-06	Serpentine
7TM_GPCR_Sri|PF10327.10	PPA16353	5e-15	Serpentine
7TM_GPCR_Sri|PF10327.10	PPA16379	2.6e-42	Serpentine
7TM_GPCR_Sri|PF10327.10	PPA22076	8.8e-15	Serpentine
7TM_GPCR_Sri|PF10327.10	PPA22211	3.6e-08	Serpentine
7TM_GPCR_Sri|PF10327.10	PPA23162	9.7e-46	Serpentine
7TM_GPCR_Sri|PF10327.10	PPA23290	5.4e-19	Serpentine
7TM_GPCR_Sri|PF10327.10	PPA26053	8.6e-22	Serpentine
7TM_GPCR_Sri|PF10327.10	PPA27059	2.3e-59	Serpentine
7TM_GPCR_Sri|PF10327.10	PPA27921	2e-19	Serpentine
7TM_GPCR_Sri|PF10327.10	PPA28366	4.7e-16	Serpentine
7TM_GPCR_Sri|PF10327.10	PPA29501	1.4e-09	Serpentine
7TM_GPCR_Sri|PF10327.10	PPA29559	4e-15	Serpentine
7TM_GPCR_Sri|PF10327.10	PPA29564	2.1e-16	Serpentine
7TM_GPCR_Sri|PF10327.10	PPA29590	3.1e-09	Serpentine
7TM_GPCR_Sri|PF10327.10	PPA29737	9.5e-24	Serpentine
7TM_GPCR_Sri|PF10327.10	PPA30220	3e-41	Serpentine
7TM_GPCR_Sri|PF10327.10	PPA31150	1.4e-29	Serpentine
7TM_GPCR_Sri|PF10327.10	PPA31279	3.3e-20	Serpentine
7TM_GPCR_Sri|PF10327.10	PPA31299	4.1e-13	Serpentine
7TM_GPCR_Sri|PF10327.10	PPA31722	1.5e-06	Serpentine
7TM_GPCR_Sri|PF10327.10	PPA33384	3.8e-21	Serpentine
7TM_GPCR_Sri|PF10327.10	PPA34274	8.8e-16	Serpentine
7TM_GPCR_Sri|PF10327.10	PPA34573	1.6e-10	Serpentine
7TM_GPCR_Sri|PF10327.10	PPA34776	9.1e-08	Serpentine
7TM_GPCR_Sri|PF10327.10	PPA35122	1.9e-24	Serpentine
7TM_GPCR_Sri|PF10327.10	PPA35237	5.4e-25	Serpentine
7TM_GPCR_Sri|PF10327.10	PPA36276	1.1e-14	Serpentine
7TM_GPCR_Sri|PF10327.10	PPA36327	5.7e-05	Serpentine
7TM_GPCR_Sri|PF10327.10	PPA37146	6.4e-17	Serpentine
7TM_GPCR_Sri|PF10327.10	PPA37929	5.3e-33	Serpentine
7TM_GPCR_Sri|PF10327.10	PPA38172	9.7e-67	Serpentine
7TM_GPCR_Sri|PF10327.10	PPA38764	9.5e-16	Serpentine
7TM_GPCR_Sri|PF10327.10	PPA38765	4e-22	Serpentine
7TM_GPCR_Sri|PF10327.10	PPA39191	1.2e-12	Serpentine
7TM_GPCR_Sri|PF10327.10	PPA39238	3.3e-28	Serpentine
7TM_GPCR_Sri|PF10327.10	PPA39270	1.9e-15	Serpentine
7TM_GPCR_Sri|PF10327.10	PPA39517	2e-05	Serpentine
7TM_GPCR_Sri|PF10327.10	PPA39520	8.7e-27	Serpentine
7TM_GPCR_Sri|PF10327.10	PPA39828	6.7e-25	Serpentine
7TM_GPCR_Sri|PF10327.10	PPA40003	1.7e-11	Serpentine
7TM_GPCR_Sri|PF10327.10	PPA40377	2.9e-31	Serpentine
7TM_GPCR_Sri|PF10327.10	PPA40387	4.7e-19	Serpentine
7TM_GPCR_Sri|PF10327.10	PPA40400	3.2e-36	Serpentine
7TM_GPCR_Sri|PF10327.10	PPA40446	0.0023	Serpentine
7TM_GPCR_Sri|PF10327.10	PPA40449	6.8e-14	Serpentine
7TM_GPCR_Sri|PF10327.10	PPA40469	3.7e-27	Serpentine
7TM_GPCR_Sri|PF10327.10	PPA40470	6e-24	Serpentine
7TM_GPCR_Sri|PF10327.10	PPA40796	1.1e-10	Serpentine
7TM_GPCR_Sri|PF10327.10	PPA40860	8.8e-26	Serpentine
7TM_GPCR_Sri|PF10327.10	PPA40861	7.4e-10	Serpentine
7TM_GPCR_Sri|PF10327.10	PPA40864	7.6e-10	Serpentine
7TM_GPCR_Sri|PF10327.10	PPA40904	5.3e-13	Serpentine
7TM_GPCR_Sri|PF10327.10	PPA40907	3.7e-59	Serpentine
7TM_GPCR_Sri|PF10327.10	PPA40925	4.1e-40	Serpentine
7TM_GPCR_Sri|PF10327.10	PPA40985	0.00016	Serpentine
7TM_GPCR_Sri|PF10327.10	PPA41064	3.6e-15	Serpentine
7TM_GPCR_Sri|PF10327.10	PPA41089	3.6e-14	Serpentine
7TM_GPCR_Sri|PF10327.10	PPA41092	1.1e-09	Serpentine
7TM_GPCR_Sri|PF10327.10	PPA41094	9.1e-07	Serpentine
7TM_GPCR_Sri|PF10327.10	PPA41124	1.8e-15	Serpentine
7TM_GPCR_Sri|PF10327.10	PPA41225	2.1e-08	Serpentine
7TM_GPCR_Sri|PF10327.10	PPA41285	1.1e-15	Serpentine
7TM_GPCR_Sri|PF10327.10	PPA41317	5e-20	Serpentine
7TM_GPCR_Sri|PF10327.10	PPA41322	3.2e-19	Serpentine
7TM_GPCR_Sri|PF10327.10	PPA41355	1.2e-06	Serpentine
7TM_GPCR_Sri|PF10327.10	PPA41379	1.5e-19	Serpentine
7TM_GPCR_Sri|PF10327.10	PPA41428	4.7e-09	Serpentine
7TM_GPCR_Sri|PF10327.10	PPA41438	9.7e-21	Serpentine
7TM_GPCR_Sri|PF10327.10	PPA41453	3.6e-05	Serpentine
7TM_GPCR_Sri|PF10327.10	PPA41511	1.9e-05	Serpentine
7TM_GPCR_Sri|PF10327.10	PPA41547	2.4e-12	Serpentine
7TM_GPCR_Sri|PF10327.10	PPA41563	9.6e-24	Serpentine
7TM_GPCR_Sri|PF10327.10	PPA41586	3.6e-25	Serpentine
7TM_GPCR_Sri|PF10327.10	PPA41605	1.6e-25	Serpentine
7TM_GPCR_Sri|PF10327.10	PPA41638	6.8e-36	Serpentine
7TM_GPCR_Sri|PF10327.10	PPA41724	0.00049	Serpentine
7TM_GPCR_Sri|PF10327.10	PPA41777	3.8e-29	Serpentine
7TM_GPCR_Sri|PF10327.10	PPA41778	2.1e-13	Serpentine
7TM_GPCR_Sri|PF10327.10	PPA41796	2.8e-06	Serpentine
7TM_GPCR_Sri|PF10327.10	PPA41798	2.4e-20	Serpentine
7TM_GPCR_Sri|PF10327.10	PPA41823	4.2e-16	Serpentine
7TM_GPCR_Sri|PF10327.10	PPA42443	0.0029	Serpentine
7TM_GPCR_Sri|PF10327.10	PPA42565	5.6e-11	Serpentine
7TM_GPCR_Sri|PF10327.10	PPA42730	2.3e-21	Serpentine
7TM_GPCR_Sri|PF10327.10	PPA42741	3.5e-10	Serpentine
7TM_GPCR_Sri|PF10327.10	PPA42779	4.3e-14	Serpentine
7TM_GPCR_Sri|PF10327.10	PPA43008	0.00021	Serpentine
7TM_GPCR_Sri|PF10327.10	PPA43054	6.1e-14	Serpentine
7TM_GPCR_Sri|PF10327.10	PPA43086	5.1e-19	Serpentine
7TM_GPCR_Sri|PF10327.10	PPA44037	7.3e-10	Serpentine
7TM_GPCR_Sri|PF10327.10	PPA44317	9.4e-16	Serpentine
7TM_GPCR_Sri|PF10327.10	PPA44993	3.1e-08	Serpentine
7TM_GPCR_Sri|PF10327.10	PPA45624	0.0036	Serpentine
7TM_GPCR_Sri|PF10327.10	PPA45842	1.5e-12	Serpentine
7TM_GPCR_Sri|PF10327.10	UMM-S2840-10.60-mRNA-1_frag_2	6e-52	Serpentine
7TM_GPCR_Sri|PF10327.10	UMM-S2840-18.74-mRNA-1_trimmed	1.3e-07	Serpentine
7TM_GPCR_Srj|PF10319.10	ppa_stranded_DN34800_c0_g1_i1	2.8e-05	Serpentine
7TM_GPCR_Srj|PF10319.10	PPA30065	0.00042	Serpentine
7TM_GPCR_Srj|PF10319.10	PPA38292	0.0017	Serpentine
7TM_GPCR_Srj|PF10319.10	PPA41043	7.8e-05	Serpentine
7TM_GPCR_Srsx|PF10320.10	Contig129-snapTAU.11	2.8e-27	Serpentine
7TM_GPCR_Srsx|PF10320.10	ppa_stranded_DN17263_c0_g1_i1	5.7e-24	Serpentine
7TM_GPCR_Srsx|PF10320.10	ppa_stranded_DN1842_c0_g1_i1	1.1e-17	Serpentine
7TM_GPCR_Srsx|PF10320.10	ppa_stranded_DN19471_c0_g1_i1	3.1e-17	Serpentine
7TM_GPCR_Srsx|PF10320.10	ppa_stranded_DN27448_c0_g1_i1	2.3e-33	Serpentine
7TM_GPCR_Srsx|PF10320.10	ppa_stranded_DN35989_c0_g1_i1	6.8e-24	Serpentine
7TM_GPCR_Srsx|PF10320.10	ppa_stranded_DN37289_c0_g1_i1	1.6e-22	Serpentine
7TM_GPCR_Srsx|PF10320.10	ppa_stranded_DN37925_c0_g1_i1	5.3e-11	Serpentine
7TM_GPCR_Srsx|PF10320.10	ppa_stranded_DN39892_c0_g1_i1	2e-20	Serpentine
7TM_GPCR_Srsx|PF10320.10	PPA00255	1.5e-46	Serpentine
7TM_GPCR_Srsx|PF10320.10	PPA00942	0.00047	Serpentine
7TM_GPCR_Srsx|PF10320.10	PPA02315	1.5e-93	Serpentine
7TM_GPCR_Srsx|PF10320.10	PPA02895	0.00094	Serpentine
7TM_GPCR_Srsx|PF10320.10	PPA03597	2.7e-07	Serpentine
7TM_GPCR_Srsx|PF10320.10	PPA04029	2.4e-28	Serpentine
7TM_GPCR_Srsx|PF10320.10	PPA05893	4.4e-20	Serpentine
7TM_GPCR_Srsx|PF10320.10	PPA08016	2.1e-35	Serpentine
7TM_GPCR_Srsx|PF10320.10	PPA09049	6.6e-24	Serpentine
7TM_GPCR_Srsx|PF10320.10	PPA11517	2.9e-20	Serpentine
7TM_GPCR_Srsx|PF10320.10	PPA15495	8.8e-30	Serpentine
7TM_GPCR_Srsx|PF10320.10	PPA17083	1.4e-06	Serpentine
7TM_GPCR_Srsx|PF10320.10	PPA17433	5.2e-36	Serpentine
7TM_GPCR_Srsx|PF10320.10	PPA18029	1.1e-07	Serpentine
7TM_GPCR_Srsx|PF10320.10	PPA20723	1.6e-14	Serpentine
7TM_GPCR_Srsx|PF10320.10	PPA22287	2.8e-37	Serpentine
7TM_GPCR_Srsx|PF10320.10	PPA23244	3.5e-20	Serpentine
7TM_GPCR_Srsx|PF10320.10	PPA25604	0.0026	Serpentine
7TM_GPCR_Srsx|PF10320.10	PPA25820	2e-35	Serpentine
7TM_GPCR_Srsx|PF10320.10	PPA28340	5.9e-17	Serpentine
7TM_GPCR_Srsx|PF10320.10	PPA28486	6e-79	Serpentine
7TM_GPCR_Srsx|PF10320.10	PPA29052	2.7e-38	Serpentine
7TM_GPCR_Srsx|PF10320.10	PPA29581	9.9e-33	Serpentine
7TM_GPCR_Srsx|PF10320.10	PPA29595	2e-09	Serpentine
7TM_GPCR_Srsx|PF10320.10	PPA30424	5.1e-15	Serpentine
7TM_GPCR_Srsx|PF10320.10	PPA31276	3.5e-36	Serpentine
7TM_GPCR_Srsx|PF10320.10	PPA31805	1.6e-15	Serpentine
7TM_GPCR_Srsx|PF10320.10	PPA33100	8.1e-65	Serpentine
7TM_GPCR_Srsx|PF10320.10	PPA33273	1.1e-33	Serpentine
7TM_GPCR_Srsx|PF10320.10	PPA34305	3.3e-31	Serpentine
7TM_GPCR_Srsx|PF10320.10	PPA34690	8.8e-23	Serpentine
7TM_GPCR_Srsx|PF10320.10	PPA36161	1.1e-28	Serpentine
7TM_GPCR_Srsx|PF10320.10	PPA36213	1.9e-35	Serpentine
7TM_GPCR_Srsx|PF10320.10	PPA37221	7.1e-06	Serpentine
7TM_GPCR_Srsx|PF10320.10	PPA38106	1.2e-10	Serpentine
7TM_GPCR_Srsx|PF10320.10	PPA39729	6e-05	Serpentine
7TM_GPCR_Srsx|PF10320.10	PPA40029	9.7e-28	Serpentine
7TM_GPCR_Srsx|PF10320.10	PPA40327	1.5e-35	Serpentine
7TM_GPCR_Srsx|PF10320.10	PPA40363	2.9e-07	Serpentine
7TM_GPCR_Srsx|PF10320.10	PPA40967	3.2e-56	Serpentine
7TM_GPCR_Srsx|PF10320.10	PPA41028	5.5e-20	Serpentine
7TM_GPCR_Srsx|PF10320.10	PPA41031	4.4e-34	Serpentine
7TM_GPCR_Srsx|PF10320.10	PPA41068	1.3e-16	Serpentine
7TM_GPCR_Srsx|PF10320.10	PPA41084	8.2e-22	Serpentine
7TM_GPCR_Srsx|PF10320.10	PPA41192	3.9e-07	Serpentine
7TM_GPCR_Srsx|PF10320.10	PPA41515	3.1e-25	Serpentine
7TM_GPCR_Srsx|PF10320.10	PPA41545	1.5e-19	Serpentine
7TM_GPCR_Srsx|PF10320.10	PPA41555	2.7e-20	Serpentine
7TM_GPCR_Srsx|PF10320.10	PPA41578	1.5e-08	Serpentine
7TM_GPCR_Srsx|PF10320.10	PPA41641	8.8e-12	Serpentine
7TM_GPCR_Srsx|PF10320.10	PPA41907	1.4e-09	Serpentine
7TM_GPCR_Srsx|PF10320.10	PPA42375	3.2e-16	Serpentine
7TM_GPCR_Srsx|PF10320.10	PPA42453	4.6e-09	Serpentine
7TM_GPCR_Srsx|PF10320.10	PPA42716	4.5e-45	Serpentine
7TM_GPCR_Srsx|PF10320.10	PPA42860	2.6e-32	Serpentine
7TM_GPCR_Srsx|PF10320.10	PPA43060	1.9e-15	Serpentine
7TM_GPCR_Srsx|PF10320.10	PPA43474	1.8e-40	Serpentine
7TM_GPCR_Srsx|PF10320.10	PPA45793	2.9e-05	Serpentine
7TM_GPCR_Srt|PF10321.10	Contig23-snapTAU.323	4.6e-34	Serpentine
7TM_GPCR_Srt|PF10321.10	Contig43-snapTAU.175	9.4e-45	Serpentine
7TM_GPCR_Srt|PF10321.10	Contig43-snapTAU.176	1.8e-38	Serpentine
7TM_GPCR_Srt|PF10321.10	ppa_stranded_DN33198_c0_g1_i1	1.1e-24	Serpentine
7TM_GPCR_Srt|PF10321.10	ppa_stranded_DN33759_c0_g1_i1	1.8e-17	Serpentine
7TM_GPCR_Srt|PF10321.10	PPA00805	7.8e-12	Serpentine
7TM_GPCR_Srt|PF10321.10	PPA01835	3.3e-39	Serpentine
7TM_GPCR_Srt|PF10321.10	PPA03569	2.5e-84	Serpentine
7TM_GPCR_Srt|PF10321.10	PPA03754	5.8e-90	Serpentine
7TM_GPCR_Srt|PF10321.10	PPA03777	2.1e-75	Serpentine
7TM_GPCR_Srt|PF10321.10	PPA04184	2.5e-45	Serpentine
7TM_GPCR_Srt|PF10321.10	PPA04377	6.7e-42	Serpentine
7TM_GPCR_Srt|PF10321.10	PPA05435	4.1e-19	Serpentine
7TM_GPCR_Srt|PF10321.10	PPA06607	9.8e-71	Serpentine
7TM_GPCR_Srt|PF10321.10	PPA07070	4.9e-63	Serpentine
7TM_GPCR_Srt|PF10321.10	PPA09414	1.6e-30	Serpentine
7TM_GPCR_Srt|PF10321.10	PPA10116	1.5e-48	Serpentine
7TM_GPCR_Srt|PF10321.10	PPA10970	5.5e-62	Serpentine
7TM_GPCR_Srt|PF10321.10	PPA11987	7.8e-48	Serpentine
7TM_GPCR_Srt|PF10321.10	PPA13813	2.9e-80	Serpentine
7TM_GPCR_Srt|PF10321.10	PPA14311	4.3e-51	Serpentine
7TM_GPCR_Srt|PF10321.10	PPA15552	3.4e-82	Serpentine
7TM_GPCR_Srt|PF10321.10	PPA18184	1.9e-30	Serpentine
7TM_GPCR_Srt|PF10321.10	PPA22109	3.6e-59	Serpentine
7TM_GPCR_Srt|PF10321.10	PPA25119	3.7e-69	Serpentine
7TM_GPCR_Srt|PF10321.10	PPA27045	2e-09	Serpentine
7TM_GPCR_Srt|PF10321.10	PPA29610	2.1e-107	Serpentine
7TM_GPCR_Srt|PF10321.10	PPA31720	1.6e-38	Serpentine
7TM_GPCR_Srt|PF10321.10	PPA31794	2.2e-39	Serpentine
7TM_GPCR_Srt|PF10321.10	PPA34129	4.6e-73	Serpentine
7TM_GPCR_Srt|PF10321.10	PPA34143	3.4e-15	Serpentine
7TM_GPCR_Srt|PF10321.10	PPA34235	1.8e-21	Serpentine
7TM_GPCR_Srt|PF10321.10	PPA39998	6.1e-54	Serpentine
7TM_GPCR_Srt|PF10321.10	PPA40423	1.1e-76	Serpentine
7TM_GPCR_Srt|PF10321.10	PPA40474	5.1e-12	Serpentine
7TM_GPCR_Srt|PF10321.10	PPA40525	5.4e-79	Serpentine
7TM_GPCR_Srt|PF10321.10	PPA40541	2e-55	Serpentine
7TM_GPCR_Srt|PF10321.10	PPA40583	2.4e-29	Serpentine
7TM_GPCR_Srt|PF10321.10	PPA40618	1.1e-47	Serpentine
7TM_GPCR_Srt|PF10321.10	PPA40862	1.6e-40	Serpentine
7TM_GPCR_Srt|PF10321.10	PPA41115	5e-38	Serpentine
7TM_GPCR_Srt|PF10321.10	PPA41281	3.7e-23	Serpentine
7TM_GPCR_Srt|PF10321.10	PPA41282	0.0075	Serpentine
7TM_GPCR_Srt|PF10321.10	PPA41283	3.1e-15	Serpentine
7TM_GPCR_Srt|PF10321.10	PPA41284	2.3e-19	Serpentine
7TM_GPCR_Srt|PF10321.10	PPA41324	5.7e-45	Serpentine
7TM_GPCR_Srt|PF10321.10	PPA41343	3.3e-09	Serpentine
7TM_GPCR_Srt|PF10321.10	PPA41358	4.1e-79	Serpentine
7TM_GPCR_Srt|PF10321.10	PPA41478	1.6e-98	Serpentine
7TM_GPCR_Srt|PF10321.10	PPA41576	1.9e-22	Serpentine
7TM_GPCR_Srt|PF10321.10	PPA41680	4.6e-15	Serpentine
7TM_GPCR_Srt|PF10321.10	PPA42279	8.4e-74	Serpentine
7TM_GPCR_Srt|PF10321.10	PPA42377	1.8e-05	Serpentine
7TM_GPCR_Srt|PF10321.10	PPA42379	1.2e-33	Serpentine
7TM_GPCR_Srt|PF10321.10	PPA42380	4.7e-51	Serpentine
7TM_GPCR_Srt|PF10321.10	PPA42404	4.6e-33	Serpentine
7TM_GPCR_Srt|PF10321.10	PPA42461	2.3e-07	Serpentine
7TM_GPCR_Srt|PF10321.10	PPA42462	2.1e-18	Serpentine
7TM_GPCR_Srt|PF10321.10	PPA42463	2e-16	Serpentine
7TM_GPCR_Srt|PF10321.10	PPA43179	2.8e-36	Serpentine
7TM_GPCR_Srt|PF10321.10	PPA43528	2.5e-59	Serpentine
7TM_GPCR_Srt|PF10321.10	PPA44115	2.9e-10	Serpentine
7TM_GPCR_Srt|PF10321.10	PPA45560	3.4e-47	Serpentine
7TM_GPCR_Srt|PF10321.10	PPA45619	1.3e-20	Serpentine
7TM_GPCR_Sru|PF10322.10	PPA07390	6.5e-06	Serpentine
7TM_GPCR_Sru|PF10322.10	PPA35232	4.3e-06	Serpentine
7TM_GPCR_Sru|PF10322.10	PPA39771	0.0065	Serpentine
7TM_GPCR_Sru|PF10322.10	PPA39905	3.6e-05	Serpentine
7TM_GPCR_Srv|PF10323.10	Contig10-snapTAU.70	2.1e-12	Serpentine
7TM_GPCR_Srv|PF10323.10	Contig6-snapTAU.169	1.9e-15	Serpentine
7TM_GPCR_Srv|PF10323.10	Contig6-snapTAU.170	2.3e-12	Serpentine
7TM_GPCR_Srv|PF10323.10	Contig82-snapTAU.90	9.1e-11	Serpentine
7TM_GPCR_Srv|PF10323.10	Iso_D.15015.1	3.7e-24	Serpentine
7TM_GPCR_Srv|PF10323.10	Iso_D.5048.1	8.1e-11	Serpentine
7TM_GPCR_Srv|PF10323.10	ppa_stranded_DN37545_c0_g1_i1	0.001	Serpentine
7TM_GPCR_Srv|PF10323.10	ppa_stranded_DN40966_c0_g1_i1	5.4e-11	Serpentine
7TM_GPCR_Srv|PF10323.10	ppa_stranded_DN41951_c0_g1_i1	1.6e-12	Serpentine
7TM_GPCR_Srv|PF10323.10	ppa_stranded_DN49222_c0_g1_i1	0.00031	Serpentine
7TM_GPCR_Srv|PF10323.10	PPA00808	6.2e-35	Serpentine
7TM_GPCR_Srv|PF10323.10	PPA03615	1.7e-09	Serpentine
7TM_GPCR_Srv|PF10323.10	PPA04877	3.1e-21	Serpentine
7TM_GPCR_Srv|PF10323.10	PPA05088	2.4e-08	Serpentine
7TM_GPCR_Srv|PF10323.10	PPA05319	3.3e-29	Serpentine
7TM_GPCR_Srv|PF10323.10	PPA05882	3e-18	Serpentine
7TM_GPCR_Srv|PF10323.10	PPA06005	5.8e-21	Serpentine
7TM_GPCR_Srv|PF10323.10	PPA06066	2.5e-46	Serpentine
7TM_GPCR_Srv|PF10323.10	PPA07995	7.2e-20	Serpentine
7TM_GPCR_Srv|PF10323.10	PPA08779	1.3e-06	Serpentine
7TM_GPCR_Srv|PF10323.10	PPA08930	4.9e-23	Serpentine
7TM_GPCR_Srv|PF10323.10	PPA09323	3.3e-32	Serpentine
7TM_GPCR_Srv|PF10323.10	PPA11608	7.8e-32	Serpentine
7TM_GPCR_Srv|PF10323.10	PPA13810	4.1e-25	Serpentine
7TM_GPCR_Srv|PF10323.10	PPA14548	2.6e-21	Serpentine
7TM_GPCR_Srv|PF10323.10	PPA14775	5.2e-07	Serpentine
7TM_GPCR_Srv|PF10323.10	PPA15502	9.9e-09	Serpentine
7TM_GPCR_Srv|PF10323.10	PPA16095	9.4e-13	Serpentine
7TM_GPCR_Srv|PF10323.10	PPA16432	2.3e-21	Serpentine
7TM_GPCR_Srv|PF10323.10	PPA16499	4.2e-05	Serpentine
7TM_GPCR_Srv|PF10323.10	PPA16535	3.7e-15	Serpentine
7TM_GPCR_Srv|PF10323.10	PPA19023	2.1e-45	Serpentine
7TM_GPCR_Srv|PF10323.10	PPA19220	1.7e-06	Serpentine
7TM_GPCR_Srv|PF10323.10	PPA19229	4.6e-10	Serpentine
7TM_GPCR_Srv|PF10323.10	PPA20794	1.7e-26	Serpentine
7TM_GPCR_Srv|PF10323.10	PPA22090	0.00062	Serpentine
7TM_GPCR_Srv|PF10323.10	PPA23337	0.0078	Serpentine
7TM_GPCR_Srv|PF10323.10	PPA26997	1e-13	Serpentine
7TM_GPCR_Srv|PF10323.10	PPA28473	1.7e-17	Serpentine
7TM_GPCR_Srv|PF10323.10	PPA28819	8.2e-05	Serpentine
7TM_GPCR_Srv|PF10323.10	PPA29311	6.1e-07	Serpentine
7TM_GPCR_Srv|PF10323.10	PPA29368	4.7e-30	Serpentine
7TM_GPCR_Srv|PF10323.10	PPA29495	5.4e-13	Serpentine
7TM_GPCR_Srv|PF10323.10	PPA29599	5.6e-16	Serpentine
7TM_GPCR_Srv|PF10323.10	PPA29613	1.4e-26	Serpentine
7TM_GPCR_Srv|PF10323.10	PPA29782	0.0043	Serpentine
7TM_GPCR_Srv|PF10323.10	PPA30099	4.2e-05	Serpentine
7TM_GPCR_Srv|PF10323.10	PPA30514	9.4e-23	Serpentine
7TM_GPCR_Srv|PF10323.10	PPA34683	2.3e-16	Serpentine
7TM_GPCR_Srv|PF10323.10	PPA35251	9.7e-13	Serpentine
7TM_GPCR_Srv|PF10323.10	PPA35460	1.6e-13	Serpentine
7TM_GPCR_Srv|PF10323.10	PPA35842	0.00057	Serpentine
7TM_GPCR_Srv|PF10323.10	PPA36340	0.00022	Serpentine
7TM_GPCR_Srv|PF10323.10	PPA36462	8.1e-26	Serpentine
7TM_GPCR_Srv|PF10323.10	PPA36585	0.0005	Serpentine
7TM_GPCR_Srv|PF10323.10	PPA36774	9.6e-25	Serpentine
7TM_GPCR_Srv|PF10323.10	PPA37624	2.7e-16	Serpentine
7TM_GPCR_Srv|PF10323.10	PPA37901	4.3e-05	Serpentine
7TM_GPCR_Srv|PF10323.10	PPA38233	0.0033	Serpentine
7TM_GPCR_Srv|PF10323.10	PPA38425	3.5e-24	Serpentine
7TM_GPCR_Srv|PF10323.10	PPA38584	7.9e-06	Serpentine
7TM_GPCR_Srv|PF10323.10	PPA38954	8.6e-17	Serpentine
7TM_GPCR_Srv|PF10323.10	PPA39110	1.6e-33	Serpentine
7TM_GPCR_Srv|PF10323.10	PPA39451	5.7e-48	Serpentine
7TM_GPCR_Srv|PF10323.10	PPA40116	3.9e-09	Serpentine
7TM_GPCR_Srv|PF10323.10	PPA40414	1.8e-22	Serpentine
7TM_GPCR_Srv|PF10323.10	PPA40429	7.9e-24	Serpentine
7TM_GPCR_Srv|PF10323.10	PPA40434	6.8e-17	Serpentine
7TM_GPCR_Srv|PF10323.10	PPA40571	4.9e-07	Serpentine
7TM_GPCR_Srv|PF10323.10	PPA40582	1.4e-11	Serpentine
7TM_GPCR_Srv|PF10323.10	PPA40650	1.7e-33	Serpentine
7TM_GPCR_Srv|PF10323.10	PPA40660	8.9e-08	Serpentine
7TM_GPCR_Srv|PF10323.10	PPA40718	8.4e-13	Serpentine
7TM_GPCR_Srv|PF10323.10	PPA40798	8.4e-10	Serpentine
7TM_GPCR_Srv|PF10323.10	PPA40802	7.7e-28	Serpentine
7TM_GPCR_Srv|PF10323.10	PPA40819	3e-07	Serpentine
7TM_GPCR_Srv|PF10323.10	PPA40820	9.4e-05	Serpentine
7TM_GPCR_Srv|PF10323.10	PPA40839	0.00012	Serpentine
7TM_GPCR_Srv|PF10323.10	PPA40990	6.9e-12	Serpentine
7TM_GPCR_Srv|PF10323.10	PPA41083	5.4e-39	Serpentine
7TM_GPCR_Srv|PF10323.10	PPA41253	3.9e-11	Serpentine
7TM_GPCR_Srv|PF10323.10	PPA41289	9.1e-10	Serpentine
7TM_GPCR_Srv|PF10323.10	PPA41290	4.2e-05	Serpentine
7TM_GPCR_Srv|PF10323.10	PPA41295	9.1e-10	Serpentine
7TM_GPCR_Srv|PF10323.10	PPA41296	4.2e-05	Serpentine
7TM_GPCR_Srv|PF10323.10	PPA41353	1.5e-05	Serpentine
7TM_GPCR_Srv|PF10323.10	PPA41354	4e-06	Serpentine
7TM_GPCR_Srv|PF10323.10	PPA41448	5e-15	Serpentine
7TM_GPCR_Srv|PF10323.10	PPA41600	6.1e-11	Serpentine
7TM_GPCR_Srv|PF10323.10	PPA41627	1.8e-13	Serpentine
7TM_GPCR_Srv|PF10323.10	PPA41709	7.6e-34	Serpentine
7TM_GPCR_Srv|PF10323.10	PPA41729	0.00053	Serpentine
7TM_GPCR_Srv|PF10323.10	PPA42626	8.1e-25	Serpentine
7TM_GPCR_Srv|PF10323.10	PPA42722	1.1e-56	Serpentine
7TM_GPCR_Srv|PF10323.10	PPA42791	0.00029	Serpentine
7TM_GPCR_Srv|PF10323.10	PPA42995	2.3e-10	Serpentine
7TM_GPCR_Srw|PF10324.10	Iso_D.9475.1	1.8e-12	Serpentine
7TM_GPCR_Srw|PF10324.10	Iso_D.9476.1	1e-21	Serpentine
7TM_GPCR_Srw|PF10324.10	ppa_stranded_DN27568_c0_g2_i1	7.3e-40	Serpentine
7TM_GPCR_Srw|PF10324.10	ppa_stranded_DN30265_c2_g1_i6	2.9e-07	Serpentine
7TM_GPCR_Srw|PF10324.10	ppa_stranded_DN3950_c0_g2_i1	1.7e-10	Serpentine
7TM_GPCR_Srw|PF10324.10	PPA00733	5.8e-23	Serpentine
7TM_GPCR_Srw|PF10324.10	PPA03728	8.4e-24	Serpentine
7TM_GPCR_Srw|PF10324.10	PPA06827	2.5e-20	Serpentine
7TM_GPCR_Srw|PF10324.10	PPA08032	1.4e-16	Serpentine
7TM_GPCR_Srw|PF10324.10	PPA10170	1.3e-14	Serpentine
7TM_GPCR_Srw|PF10324.10	PPA10413	1.5e-57	Serpentine
7TM_GPCR_Srw|PF10324.10	PPA18493	1.3e-37	Serpentine
7TM_GPCR_Srw|PF10324.10	PPA18494	4.7e-36	Serpentine
7TM_GPCR_Srw|PF10324.10	PPA19538	9.6e-29	Serpentine
7TM_GPCR_Srw|PF10324.10	PPA20520	3.3e-22	Serpentine
7TM_GPCR_Srw|PF10324.10	PPA23692	2.4e-08	Serpentine
7TM_GPCR_Srw|PF10324.10	PPA25380	1e-44	Serpentine
7TM_GPCR_Srw|PF10324.10	PPA26446	1.7e-37	Serpentine
7TM_GPCR_Srw|PF10324.10	PPA27428	8.5e-18	Serpentine
7TM_GPCR_Srw|PF10324.10	PPA28362	7.5e-18	Serpentine
7TM_GPCR_Srw|PF10324.10	PPA29532	1.5e-10	Serpentine
7TM_GPCR_Srw|PF10324.10	PPA29555	1.6e-12	Serpentine
7TM_GPCR_Srw|PF10324.10	PPA35769	3.7e-17	Serpentine
7TM_GPCR_Srw|PF10324.10	PPA36466	3.5e-26	Serpentine
7TM_GPCR_Srw|PF10324.10	PPA36783	7.4e-12	Serpentine
7TM_GPCR_Srw|PF10324.10	PPA37485	3.4e-13	Serpentine
7TM_GPCR_Srw|PF10324.10	PPA38531	1e-26	Serpentine
7TM_GPCR_Srw|PF10324.10	PPA39979	1.4e-35	Serpentine
7TM_GPCR_Srw|PF10324.10	PPA41502	1.6e-14	Serpentine
7TM_GPCR_Srw|PF10324.10	PPA41824	2.4e-21	Serpentine
7TM_GPCR_Srw|PF10324.10	PPA42727	3.6e-26	Serpentine
7TM_GPCR_Srw|PF10324.10	UMM-S212-6.70-mRNA-1_frag	2.4e-05	Serpentine
7TM_GPCR_Srx|PF10328.10	Contig20-snapTAU.112	2.3e-15	Serpentine
7TM_GPCR_Srx|PF10328.10	Contig24-snapTAU.333	3.7e-11	Serpentine
7TM_GPCR_Srx|PF10328.10	Contig36-snap.200	2.7e-06	Serpentine
7TM_GPCR_Srx|PF10328.10	Contig79-snapTAU.25	1.3e-05	Serpentine
7TM_GPCR_Srx|PF10328.10	Iso_D.6321.1	0.0012	Serpentine
7TM_GPCR_Srx|PF10328.10	ppa_stranded_DN11269_c0_g1_i1	3.4e-10	Serpentine
7TM_GPCR_Srx|PF10328.10	ppa_stranded_DN15927_c0_g2_i1	4.7e-22	Serpentine
7TM_GPCR_Srx|PF10328.10	ppa_stranded_DN16492_c0_g2_i1	1.9e-14	Serpentine
7TM_GPCR_Srx|PF10328.10	ppa_stranded_DN19607_c0_g2_i1	1.3e-44	Serpentine
7TM_GPCR_Srx|PF10328.10	ppa_stranded_DN24705_c0_g1_i3	1.1e-05	Serpentine
7TM_GPCR_Srx|PF10328.10	ppa_stranded_DN27060_c0_g2_i1	1.6e-13	Serpentine
7TM_GPCR_Srx|PF10328.10	ppa_stranded_DN33464_c0_g1_i1	3.7e-19	Serpentine
7TM_GPCR_Srx|PF10328.10	ppa_stranded_DN35992_c0_g1_i1	3.6e-34	Serpentine
7TM_GPCR_Srx|PF10328.10	ppa_stranded_DN41544_c0_g1_i1	3.7e-42	Serpentine
7TM_GPCR_Srx|PF10328.10	ppa_stranded_DN45197_c0_g1_i1	8.3e-24	Serpentine
7TM_GPCR_Srx|PF10328.10	PPA00699	0.00035	Serpentine
7TM_GPCR_Srx|PF10328.10	PPA00804	2.1e-05	Serpentine
7TM_GPCR_Srx|PF10328.10	PPA01501	1.5e-10	Serpentine
7TM_GPCR_Srx|PF10328.10	PPA01987	4.8e-09	Serpentine
7TM_GPCR_Srx|PF10328.10	PPA02963	5.1e-09	Serpentine
7TM_GPCR_Srx|PF10328.10	PPA03706	9.9e-30	Serpentine
7TM_GPCR_Srx|PF10328.10	PPA03726	8.3e-43	Serpentine
7TM_GPCR_Srx|PF10328.10	PPA04213	1.1e-51	Serpentine
7TM_GPCR_Srx|PF10328.10	PPA04368	2.1e-11	Serpentine
7TM_GPCR_Srx|PF10328.10	PPA06268	1.4e-27	Serpentine
7TM_GPCR_Srx|PF10328.10	PPA06784	3.4e-54	Serpentine
7TM_GPCR_Srx|PF10328.10	PPA07910	1.7e-58	Serpentine
7TM_GPCR_Srx|PF10328.10	PPA09395	2.6e-50	Serpentine
7TM_GPCR_Srx|PF10328.10	PPA10205	5.3e-21	Serpentine
7TM_GPCR_Srx|PF10328.10	PPA10207	1.6e-13	Serpentine
7TM_GPCR_Srx|PF10328.10	PPA10442	7.8e-27	Serpentine
7TM_GPCR_Srx|PF10328.10	PPA11920	5.2e-65	Serpentine
7TM_GPCR_Srx|PF10328.10	PPA12168	3.4e-24	Serpentine
7TM_GPCR_Srx|PF10328.10	PPA12284	6e-21	Serpentine
7TM_GPCR_Srx|PF10328.10	PPA13343	0.00066	Serpentine
7TM_GPCR_Srx|PF10328.10	PPA13355	1.7e-25	Serpentine
7TM_GPCR_Srx|PF10328.10	PPA15311	5.4e-32	Serpentine
7TM_GPCR_Srx|PF10328.10	PPA15567	1.7e-49	Serpentine
7TM_GPCR_Srx|PF10328.10	PPA15884	3.9e-41	Serpentine
7TM_GPCR_Srx|PF10328.10	PPA16478	5.9e-64	Serpentine
7TM_GPCR_Srx|PF10328.10	PPA17143	1.4e-07	Serpentine
7TM_GPCR_Srx|PF10328.10	PPA17916	0.0076	Serpentine
7TM_GPCR_Srx|PF10328.10	PPA19493	9e-07	Serpentine
7TM_GPCR_Srx|PF10328.10	PPA20628	9.7e-22	Serpentine
7TM_GPCR_Srx|PF10328.10	PPA20838	1.6e-25	Serpentine
7TM_GPCR_Srx|PF10328.10	PPA20880	2.9e-10	Serpentine
7TM_GPCR_Srx|PF10328.10	PPA22347	4.9e-21	Serpentine
7TM_GPCR_Srx|PF10328.10	PPA22394	4.2e-35	Serpentine
7TM_GPCR_Srx|PF10328.10	PPA23189	1.7e-60	Serpentine
7TM_GPCR_Srx|PF10328.10	PPA25627	1.7e-08	Serpentine
7TM_GPCR_Srx|PF10328.10	PPA26658	6e-08	Serpentine
7TM_GPCR_Srx|PF10328.10	PPA28039	4.8e-53	Serpentine
7TM_GPCR_Srx|PF10328.10	PPA28398	1.2e-153	Serpentine
7TM_GPCR_Srx|PF10328.10	PPA28620	5.3e-60	Serpentine
7TM_GPCR_Srx|PF10328.10	PPA29413	5.3e-42	Serpentine
7TM_GPCR_Srx|PF10328.10	PPA29579	2.8e-42	Serpentine
7TM_GPCR_Srx|PF10328.10	PPA29608	9.9e-40	Serpentine
7TM_GPCR_Srx|PF10328.10	PPA30000	1.2e-14	Serpentine
7TM_GPCR_Srx|PF10328.10	PPA30336	3.8e-59	Serpentine
7TM_GPCR_Srx|PF10328.10	PPA33572	3.4e-06	Serpentine
7TM_GPCR_Srx|PF10328.10	PPA33703	0.0021	Serpentine
7TM_GPCR_Srx|PF10328.10	PPA34144	6.5e-19	Serpentine
7TM_GPCR_Srx|PF10328.10	PPA34803	7.2e-09	Serpentine
7TM_GPCR_Srx|PF10328.10	PPA34864	1.3e-05	Serpentine
7TM_GPCR_Srx|PF10328.10	PPA34966	1.4e-06	Serpentine
7TM_GPCR_Srx|PF10328.10	PPA36081	5.7e-31	Serpentine
7TM_GPCR_Srx|PF10328.10	PPA36266	1.8e-14	Serpentine
7TM_GPCR_Srx|PF10328.10	PPA36350	2.7e-66	Serpentine
7TM_GPCR_Srx|PF10328.10	PPA36465	3.6e-63	Serpentine
7TM_GPCR_Srx|PF10328.10	PPA36467	1.3e-15	Serpentine
7TM_GPCR_Srx|PF10328.10	PPA36843	0.0036	Serpentine
7TM_GPCR_Srx|PF10328.10	PPA36906	0.007	Serpentine
7TM_GPCR_Srx|PF10328.10	PPA37256	2.7e-09	Serpentine
7TM_GPCR_Srx|PF10328.10	PPA38181	7.4e-41	Serpentine
7TM_GPCR_Srx|PF10328.10	PPA38955	1.2e-31	Serpentine
7TM_GPCR_Srx|PF10328.10	PPA39128	0.0065	Serpentine
7TM_GPCR_Srx|PF10328.10	PPA39243	1.8e-37	Serpentine
7TM_GPCR_Srx|PF10328.10	PPA40024	2.8e-14	Serpentine
7TM_GPCR_Srx|PF10328.10	PPA40028	9.1e-07	Serpentine
7TM_GPCR_Srx|PF10328.10	PPA40545	7.8e-31	Serpentine
7TM_GPCR_Srx|PF10328.10	PPA40630	8.9e-46	Serpentine
7TM_GPCR_Srx|PF10328.10	PPA40737	1.1e-58	Serpentine
7TM_GPCR_Srx|PF10328.10	PPA40800	1.6e-36	Serpentine
7TM_GPCR_Srx|PF10328.10	PPA40872	5.8e-10	Serpentine
7TM_GPCR_Srx|PF10328.10	PPA40976	1.3e-17	Serpentine
7TM_GPCR_Srx|PF10328.10	PPA41015	1.2e-48	Serpentine
7TM_GPCR_Srx|PF10328.10	PPA41040	1.7e-39	Serpentine
7TM_GPCR_Srx|PF10328.10	PPA41106	8.5e-10	Serpentine
7TM_GPCR_Srx|PF10328.10	PPA41208	1.3e-25	Serpentine
7TM_GPCR_Srx|PF10328.10	PPA41497	7.5e-12	Serpentine
7TM_GPCR_Srx|PF10328.10	PPA41561	1e-33	Serpentine
7TM_GPCR_Srx|PF10328.10	PPA41664	1.9e-29	Serpentine
7TM_GPCR_Srx|PF10328.10	PPA41669	3.4e-23	Serpentine
7TM_GPCR_Srx|PF10328.10	PPA41674	5.4e-23	Serpentine
7TM_GPCR_Srx|PF10328.10	PPA41679	3.5e-27	Serpentine
7TM_GPCR_Srx|PF10328.10	PPA41687	3.4e-07	Serpentine
7TM_GPCR_Srx|PF10328.10	PPA41691	4.2e-46	Serpentine
7TM_GPCR_Srx|PF10328.10	PPA41697	2.1e-24	Serpentine
7TM_GPCR_Srx|PF10328.10	PPA41987	1.2e-09	Serpentine
7TM_GPCR_Srx|PF10328.10	PPA42281	2.2e-23	Serpentine
7TM_GPCR_Srx|PF10328.10	PPA42355	0.004	Serpentine
7TM_GPCR_Srx|PF10328.10	PPA42476	6.7e-17	Serpentine
7TM_GPCR_Srx|PF10328.10	PPA42773	0.0072	Serpentine
7TM_GPCR_Srx|PF10328.10	PPA45779	2.4e-06	Serpentine
7TM_GPCR_Srx|PF10328.10	PPA45947	1.9e-12	Serpentine
7TM_GPCR_Srx|PF10328.10	UMM-S10-65.27-mRNA-1_frag	3.7e-65	Serpentine
7TM_GPCR_Srx|PF10328.10	UMM-S296-2.47-mRNA-1_frag	3.5e-35	Serpentine
7TM_GPCR_Srx|PF10328.10	UMM-S387-2.8-mRNA-1_frag	4.9e-48	Serpentine
7TM_GPCR_Str|PF10326.10	Contig104-snapTAU.98	1.9e-19	Serpentine
7TM_GPCR_Str|PF10326.10	Contig2-snapTAU.203	6.1e-08	Serpentine
7TM_GPCR_Str|PF10326.10	Contig2-snapTAU.518	5.1e-49	Serpentine
7TM_GPCR_Str|PF10326.10	Contig23-snapTAU.292	2e-51	Serpentine
7TM_GPCR_Str|PF10326.10	Contig43-snapTAU.101	7.1e-13	Serpentine
7TM_GPCR_Str|PF10326.10	Contig58-snapTAU.109	4.2e-40	Serpentine
7TM_GPCR_Str|PF10326.10	Contig60-snapTAU.91	5e-37	Serpentine
7TM_GPCR_Str|PF10326.10	Contig91-snapTAU.33	2.5e-27	Serpentine
7TM_GPCR_Str|PF10326.10	Iso_D.3514.1	5.9e-30	Serpentine
7TM_GPCR_Str|PF10326.10	ppa_stranded_DN10466_c0_g1_i1	1.7e-14	Serpentine
7TM_GPCR_Str|PF10326.10	ppa_stranded_DN10882_c0_g1_i1	1e-08	Serpentine
7TM_GPCR_Str|PF10326.10	ppa_stranded_DN11357_c0_g1_i1	2e-15	Serpentine
7TM_GPCR_Str|PF10326.10	ppa_stranded_DN1179_c0_g1_i1	1.6e-11	Serpentine
7TM_GPCR_Str|PF10326.10	ppa_stranded_DN17469_c0_g1_i1	5.3e-18	Serpentine
7TM_GPCR_Str|PF10326.10	ppa_stranded_DN18013_c1_g1_i1	4.8e-31	Serpentine
7TM_GPCR_Str|PF10326.10	ppa_stranded_DN18236_c0_g2_i1	2.8e-41	Serpentine
7TM_GPCR_Str|PF10326.10	ppa_stranded_DN18937_c0_g2_i1	5.3e-30	Serpentine
7TM_GPCR_Str|PF10326.10	ppa_stranded_DN21168_c0_g3_i1	1.3e-14	Serpentine
7TM_GPCR_Str|PF10326.10	ppa_stranded_DN24437_c0_g2_i2	1.1e-08	Serpentine
7TM_GPCR_Str|PF10326.10	ppa_stranded_DN31550_c1_g3_i2	5.9e-14	Serpentine
7TM_GPCR_Str|PF10326.10	ppa_stranded_DN33889_c0_g1_i1	1.1e-32	Serpentine
7TM_GPCR_Str|PF10326.10	ppa_stranded_DN35790_c0_g1_i1	4.3e-18	Serpentine
7TM_GPCR_Str|PF10326.10	ppa_stranded_DN36402_c0_g1_i1	0.0003	Serpentine
7TM_GPCR_Str|PF10326.10	ppa_stranded_DN42685_c0_g1_i1	1.1e-17	Serpentine
7TM_GPCR_Str|PF10326.10	PPA00645	2.2e-86	Serpentine
7TM_GPCR_Str|PF10326.10	PPA01645	1.8e-82	Serpentine
7TM_GPCR_Str|PF10326.10	PPA02098	2e-27	Serpentine
7TM_GPCR_Str|PF10326.10	PPA02373	5.9e-28	Serpentine
7TM_GPCR_Str|PF10326.10	PPA02844	1.7e-24	Serpentine
7TM_GPCR_Str|PF10326.10	PPA03687	1.3e-40	Serpentine
7TM_GPCR_Str|PF10326.10	PPA03756	3e-77	Serpentine
7TM_GPCR_Str|PF10326.10	PPA04353	3.4e-43	Serpentine
7TM_GPCR_Str|PF10326.10	PPA04415	5.9e-42	Serpentine
7TM_GPCR_Str|PF10326.10	PPA04424	1.7e-49	Serpentine
7TM_GPCR_Str|PF10326.10	PPA04430	5.3e-34	Serpentine
7TM_GPCR_Str|PF10326.10	PPA05578	2.4e-122	Serpentine
7TM_GPCR_Str|PF10326.10	PPA05586	2.2e-38	Serpentine
7TM_GPCR_Str|PF10326.10	PPA05603	1.5e-32	Serpentine
7TM_GPCR_Str|PF10326.10	PPA05606	9.3e-68	Serpentine
7TM_GPCR_Str|PF10326.10	PPA05832	3.8e-41	Serpentine
7TM_GPCR_Str|PF10326.10	PPA06260	2.2e-59	Serpentine
7TM_GPCR_Str|PF10326.10	PPA06564	4.8e-09	Serpentine
7TM_GPCR_Str|PF10326.10	PPA06589	5.6e-17	Serpentine
7TM_GPCR_Str|PF10326.10	PPA06630	1.5e-22	Serpentine
7TM_GPCR_Str|PF10326.10	PPA06641	1.5e-44	Serpentine
7TM_GPCR_Str|PF10326.10	PPA06659	1.1e-44	Serpentine
7TM_GPCR_Str|PF10326.10	PPA06674	4.4e-41	Serpentine
7TM_GPCR_Str|PF10326.10	PPA07170	4e-47	Serpentine
7TM_GPCR_Str|PF10326.10	PPA08315	2.7e-39	Serpentine
7TM_GPCR_Str|PF10326.10	PPA08951	1.8e-35	Serpentine
7TM_GPCR_Str|PF10326.10	PPA09805	0.007	Serpentine
7TM_GPCR_Str|PF10326.10	PPA10074	1.2e-75	Serpentine
7TM_GPCR_Str|PF10326.10	PPA10456	2.3e-24	Serpentine
7TM_GPCR_Str|PF10326.10	PPA10722	4e-30	Serpentine
7TM_GPCR_Str|PF10326.10	PPA10868	3.2e-95	Serpentine
7TM_GPCR_Str|PF10326.10	PPA11412	4e-26	Serpentine
7TM_GPCR_Str|PF10326.10	PPA12288	2.5e-45	Serpentine
7TM_GPCR_Str|PF10326.10	PPA12304	1e-85	Serpentine
7TM_GPCR_Str|PF10326.10	PPA13311	1e-15	Serpentine
7TM_GPCR_Str|PF10326.10	PPA13315	1.2e-08	Serpentine
7TM_GPCR_Str|PF10326.10	PPA13803	7.7e-19	Serpentine
7TM_GPCR_Str|PF10326.10	PPA14892	1.8e-40	Serpentine
7TM_GPCR_Str|PF10326.10	PPA15584	8e-109	Serpentine
7TM_GPCR_Str|PF10326.10	PPA15590	1.6e-71	Serpentine
7TM_GPCR_Str|PF10326.10	PPA15652	1e-47	Serpentine
7TM_GPCR_Str|PF10326.10	PPA15657	8e-124	Serpentine
7TM_GPCR_Str|PF10326.10	PPA16359	5.7e-79	Serpentine
7TM_GPCR_Str|PF10326.10	PPA16381	1.7e-06	Serpentine
7TM_GPCR_Str|PF10326.10	PPA16515	9.3e-50	Serpentine
7TM_GPCR_Str|PF10326.10	PPA17796	1.1e-34	Serpentine
7TM_GPCR_Str|PF10326.10	PPA18509	3.1e-13	Serpentine
7TM_GPCR_Str|PF10326.10	PPA18599	5.4e-28	Serpentine
7TM_GPCR_Str|PF10326.10	PPA19351	3.1e-36	Serpentine
7TM_GPCR_Str|PF10326.10	PPA19625	1.1e-37	Serpentine
7TM_GPCR_Str|PF10326.10	PPA19728	4.7e-07	Serpentine
7TM_GPCR_Str|PF10326.10	PPA21167	9.8e-25	Serpentine
7TM_GPCR_Str|PF10326.10	PPA21412	7.6e-11	Serpentine
7TM_GPCR_Str|PF10326.10	PPA21454	5.2e-14	Serpentine
7TM_GPCR_Str|PF10326.10	PPA21458	1.8e-10	Serpentine
7TM_GPCR_Str|PF10326.10	PPA21499	6.7e-46	Serpentine
7TM_GPCR_Str|PF10326.10	PPA21541	7.3e-17	Serpentine
7TM_GPCR_Str|PF10326.10	PPA21545	4.3e-35	Serpentine
7TM_GPCR_Str|PF10326.10	PPA21584	6.9e-43	Serpentine
7TM_GPCR_Str|PF10326.10	PPA23135	4.4e-54	Serpentine
7TM_GPCR_Str|PF10326.10	PPA23173	9.4e-73	Serpentine
7TM_GPCR_Str|PF10326.10	PPA23258	1.7e-09	Serpentine
7TM_GPCR_Str|PF10326.10	PPA23261	2.9e-152	Serpentine
7TM_GPCR_Str|PF10326.10	PPA23273	1.8e-10	Serpentine
7TM_GPCR_Str|PF10326.10	PPA23336	8.5e-09	Serpentine
7TM_GPCR_Str|PF10326.10	PPA23978	8.3e-84	Serpentine
7TM_GPCR_Str|PF10326.10	PPA24052	0.00024	Serpentine
7TM_GPCR_Str|PF10326.10	PPA24165	9.3e-27	Serpentine
7TM_GPCR_Str|PF10326.10	PPA24175	7.2e-19	Serpentine
7TM_GPCR_Str|PF10326.10	PPA24178	1.5e-53	Serpentine
7TM_GPCR_Str|PF10326.10	PPA24198	1.8e-43	Serpentine
7TM_GPCR_Str|PF10326.10	PPA24201	0.00057	Serpentine
7TM_GPCR_Str|PF10326.10	PPA24297	8.6e-10	Serpentine
7TM_GPCR_Str|PF10326.10	PPA24358	2.5e-32	Serpentine
7TM_GPCR_Str|PF10326.10	PPA25589	6e-39	Serpentine
7TM_GPCR_Str|PF10326.10	PPA25802	5.8e-36	Serpentine
7TM_GPCR_Str|PF10326.10	PPA26202	3.1e-35	Serpentine
7TM_GPCR_Str|PF10326.10	PPA26308	2.3e-20	Serpentine
7TM_GPCR_Str|PF10326.10	PPA26547	2.8e-24	Serpentine
7TM_GPCR_Str|PF10326.10	PPA26564	1.3e-46	Serpentine
7TM_GPCR_Str|PF10326.10	PPA26868	1.9e-54	Serpentine
7TM_GPCR_Str|PF10326.10	PPA26994	5.8e-12	Serpentine
7TM_GPCR_Str|PF10326.10	PPA27073	3.6e-44	Serpentine
7TM_GPCR_Str|PF10326.10	PPA27095	5.1e-28	Serpentine
7TM_GPCR_Str|PF10326.10	PPA27404	2.4e-46	Serpentine
7TM_GPCR_Str|PF10326.10	PPA27451	2.6e-30	Serpentine
7TM_GPCR_Str|PF10326.10	PPA27611	2.4e-36	Serpentine
7TM_GPCR_Str|PF10326.10	PPA28001	5.1e-43	Serpentine
7TM_GPCR_Str|PF10326.10	PPA28096	3.6e-16	Serpentine
7TM_GPCR_Str|PF10326.10	PPA28372	1.8e-54	Serpentine
7TM_GPCR_Str|PF10326.10	PPA28488	5.2e-57	Serpentine
7TM_GPCR_Str|PF10326.10	PPA28946	1.8e-32	Serpentine
7TM_GPCR_Str|PF10326.10	PPA29343	1.2e-44	Serpentine
7TM_GPCR_Str|PF10326.10	PPA29352	1.8e-62	Serpentine
7TM_GPCR_Str|PF10326.10	PPA29399	1.7e-09	Serpentine
7TM_GPCR_Str|PF10326.10	PPA29496	4.4e-39	Serpentine
7TM_GPCR_Str|PF10326.10	PPA29528	7.8e-26	Serpentine
7TM_GPCR_Str|PF10326.10	PPA29558	3.3e-41	Serpentine
7TM_GPCR_Str|PF10326.10	PPA29571	4.1e-06	Serpentine
7TM_GPCR_Str|PF10326.10	PPA29573	3.9e-41	Serpentine
7TM_GPCR_Str|PF10326.10	PPA29575	4.1e-45	Serpentine
7TM_GPCR_Str|PF10326.10	PPA29630	5.4e-56	Serpentine
7TM_GPCR_Str|PF10326.10	PPA29982	2.6e-15	Serpentine
7TM_GPCR_Str|PF10326.10	PPA30090	2.3e-32	Serpentine
7TM_GPCR_Str|PF10326.10	PPA30111	6.1e-37	Serpentine
7TM_GPCR_Str|PF10326.10	PPA30225	3.7e-16	Serpentine
7TM_GPCR_Str|PF10326.10	PPA30268	1.3e-24	Serpentine
7TM_GPCR_Str|PF10326.10	PPA30316	4.9e-10	Serpentine
7TM_GPCR_Str|PF10326.10	PPA30327	0.0035	Serpentine
7TM_GPCR_Str|PF10326.10	PPA30534	0.0098	Serpentine
7TM_GPCR_Str|PF10326.10	PPA30702	4.5e-46	Serpentine
7TM_GPCR_Str|PF10326.10	PPA31074	4.8e-35	Serpentine
7TM_GPCR_Str|PF10326.10	PPA31165	4.3e-23	Serpentine
7TM_GPCR_Str|PF10326.10	PPA31599	1.4e-81	Serpentine
7TM_GPCR_Str|PF10326.10	PPA31645	1.2e-17	Serpentine
7TM_GPCR_Str|PF10326.10	PPA31878	4.9e-28	Serpentine
7TM_GPCR_Str|PF10326.10	PPA32318	3.8e-15	Serpentine
7TM_GPCR_Str|PF10326.10	PPA32690	7.4e-20	Serpentine
7TM_GPCR_Str|PF10326.10	PPA33084	0.0072	Serpentine
7TM_GPCR_Str|PF10326.10	PPA33246	2.9e-31	Serpentine
7TM_GPCR_Str|PF10326.10	PPA33388	4.8e-07	Serpentine
7TM_GPCR_Str|PF10326.10	PPA34145	1.4e-09	Serpentine
7TM_GPCR_Str|PF10326.10	PPA34152	9.9e-15	Serpentine
7TM_GPCR_Str|PF10326.10	PPA34155	2.9e-50	Serpentine
7TM_GPCR_Str|PF10326.10	PPA34204	1.3e-24	Serpentine
7TM_GPCR_Str|PF10326.10	PPA34241	1.7e-09	Serpentine
7TM_GPCR_Str|PF10326.10	PPA34309	1e-29	Serpentine
7TM_GPCR_Str|PF10326.10	PPA34343	2.1e-23	Serpentine
7TM_GPCR_Str|PF10326.10	PPA34496	6.4e-48	Serpentine
7TM_GPCR_Str|PF10326.10	PPA34526	2.3e-34	Serpentine
7TM_GPCR_Str|PF10326.10	PPA34674	1.2e-100	Serpentine
7TM_GPCR_Str|PF10326.10	PPA34677	5.9e-45	Serpentine
7TM_GPCR_Str|PF10326.10	PPA34698	4.1e-23	Serpentine
7TM_GPCR_Str|PF10326.10	PPA34757	1.6e-09	Serpentine
7TM_GPCR_Str|PF10326.10	PPA34762	3.5e-51	Serpentine
7TM_GPCR_Str|PF10326.10	PPA34787	1e-23	Serpentine
7TM_GPCR_Str|PF10326.10	PPA34935	1.1e-33	Serpentine
7TM_GPCR_Str|PF10326.10	PPA35195	8.8e-16	Serpentine
7TM_GPCR_Str|PF10326.10	PPA35357	0.007	Serpentine
7TM_GPCR_Str|PF10326.10	PPA35368	1.6e-36	Serpentine
7TM_GPCR_Str|PF10326.10	PPA35907	7.3e-23	Serpentine
7TM_GPCR_Str|PF10326.10	PPA36136	7.4e-10	Serpentine
7TM_GPCR_Str|PF10326.10	PPA36379	6.1e-38	Serpentine
7TM_GPCR_Str|PF10326.10	PPA36483	1.8e-50	Serpentine
7TM_GPCR_Str|PF10326.10	PPA36719	2.8e-35	Serpentine
7TM_GPCR_Str|PF10326.10	PPA37434	5.3e-25	Serpentine
7TM_GPCR_Str|PF10326.10	PPA37563	2e-10	Serpentine
7TM_GPCR_Str|PF10326.10	PPA37744	5.5e-05	Serpentine
7TM_GPCR_Str|PF10326.10	PPA37877	5e-16	Serpentine
7TM_GPCR_Str|PF10326.10	PPA38552	3.3e-08	Serpentine
7TM_GPCR_Str|PF10326.10	PPA39060	1e-07	Serpentine
7TM_GPCR_Str|PF10326.10	PPA39071	5.6e-22	Serpentine
7TM_GPCR_Str|PF10326.10	PPA39135	7.1e-56	Serpentine
7TM_GPCR_Str|PF10326.10	PPA39301	8e-32	Serpentine
7TM_GPCR_Str|PF10326.10	PPA39417	5e-15	Serpentine
7TM_GPCR_Str|PF10326.10	PPA39498	7.2e-10	Serpentine
7TM_GPCR_Str|PF10326.10	PPA39521	1.2e-09	Serpentine
7TM_GPCR_Str|PF10326.10	PPA39651	2e-24	Serpentine
7TM_GPCR_Str|PF10326.10	PPA40002	1.7e-30	Serpentine
7TM_GPCR_Str|PF10326.10	PPA40361	1e-14	Serpentine
7TM_GPCR_Str|PF10326.10	PPA40379	8.7e-31	Serpentine
7TM_GPCR_Str|PF10326.10	PPA40420	8.7e-39	Serpentine
7TM_GPCR_Str|PF10326.10	PPA40427	9.3e-37	Serpentine
7TM_GPCR_Str|PF10326.10	PPA40458	6.3e-62	Serpentine
7TM_GPCR_Str|PF10326.10	PPA40463	0.004	Serpentine
7TM_GPCR_Str|PF10326.10	PPA40481	1.7e-30	Serpentine
7TM_GPCR_Str|PF10326.10	PPA40489	5.4e-11	Serpentine
7TM_GPCR_Str|PF10326.10	PPA40500	1.2e-38	Serpentine
7TM_GPCR_Str|PF10326.10	PPA40513	1.5e-22	Serpentine
7TM_GPCR_Str|PF10326.10	PPA40543	5.2e-39	Serpentine
7TM_GPCR_Str|PF10326.10	PPA40552	4.7e-38	Serpentine
7TM_GPCR_Str|PF10326.10	PPA40565	1.2e-23	Serpentine
7TM_GPCR_Str|PF10326.10	PPA40569	1.1e-42	Serpentine
7TM_GPCR_Str|PF10326.10	PPA40590	2.1e-16	Serpentine
7TM_GPCR_Str|PF10326.10	PPA40593	2.5e-08	Serpentine
7TM_GPCR_Str|PF10326.10	PPA40598	1.2e-15	Serpentine
7TM_GPCR_Str|PF10326.10	PPA40599	4.8e-25	Serpentine
7TM_GPCR_Str|PF10326.10	PPA40616	2.5e-35	Serpentine
7TM_GPCR_Str|PF10326.10	PPA40626	2e-32	Serpentine
7TM_GPCR_Str|PF10326.10	PPA40627	1.6e-23	Serpentine
7TM_GPCR_Str|PF10326.10	PPA40628	9.2e-22	Serpentine
7TM_GPCR_Str|PF10326.10	PPA40631	9e-06	Serpentine
7TM_GPCR_Str|PF10326.10	PPA40641	4.3e-48	Serpentine
7TM_GPCR_Str|PF10326.10	PPA40643	8.1e-19	Serpentine
7TM_GPCR_Str|PF10326.10	PPA40648	3.4e-08	Serpentine
7TM_GPCR_Str|PF10326.10	PPA40651	7e-15	Serpentine
7TM_GPCR_Str|PF10326.10	PPA40654	1.7e-25	Serpentine
7TM_GPCR_Str|PF10326.10	PPA40659	2.6e-26	Serpentine
7TM_GPCR_Str|PF10326.10	PPA40665	2.3e-28	Serpentine
7TM_GPCR_Str|PF10326.10	PPA40673	1.7e-14	Serpentine
7TM_GPCR_Str|PF10326.10	PPA40680	1.6e-61	Serpentine
7TM_GPCR_Str|PF10326.10	PPA40710	1.8e-42	Serpentine
7TM_GPCR_Str|PF10326.10	PPA40731	5.1e-44	Serpentine
7TM_GPCR_Str|PF10326.10	PPA40738	1.1e-33	Serpentine
7TM_GPCR_Str|PF10326.10	PPA40748	6.8e-25	Serpentine
7TM_GPCR_Str|PF10326.10	PPA40754	6.2e-72	Serpentine
7TM_GPCR_Str|PF10326.10	PPA40755	1.2e-25	Serpentine
7TM_GPCR_Str|PF10326.10	PPA40757	1.1e-29	Serpentine
7TM_GPCR_Str|PF10326.10	PPA40758	4.1e-13	Serpentine
7TM_GPCR_Str|PF10326.10	PPA40766	1.3e-14	Serpentine
7TM_GPCR_Str|PF10326.10	PPA40816	9.7e-41	Serpentine
7TM_GPCR_Str|PF10326.10	PPA40842	2.5e-36	Serpentine
7TM_GPCR_Str|PF10326.10	PPA40848	1.5e-100	Serpentine
7TM_GPCR_Str|PF10326.10	PPA40855	4.1e-20	Serpentine
7TM_GPCR_Str|PF10326.10	PPA40869	9.9e-34	Serpentine
7TM_GPCR_Str|PF10326.10	PPA40870	7.8e-05	Serpentine
7TM_GPCR_Str|PF10326.10	PPA40885	2.5e-104	Serpentine
7TM_GPCR_Str|PF10326.10	PPA40911	3.1e-06	Serpentine
7TM_GPCR_Str|PF10326.10	PPA40921	1.1e-08	Serpentine
7TM_GPCR_Str|PF10326.10	PPA40974	4.4e-52	Serpentine
7TM_GPCR_Str|PF10326.10	PPA40978	3.2e-14	Serpentine
7TM_GPCR_Str|PF10326.10	PPA41000	2.4e-23	Serpentine
7TM_GPCR_Str|PF10326.10	PPA41008	8.6e-30	Serpentine
7TM_GPCR_Str|PF10326.10	PPA41020	6.3e-10	Serpentine
7TM_GPCR_Str|PF10326.10	PPA41042	3.9e-47	Serpentine
7TM_GPCR_Str|PF10326.10	PPA41055	6.5e-40	Serpentine
7TM_GPCR_Str|PF10326.10	PPA41085	6.4e-41	Serpentine
7TM_GPCR_Str|PF10326.10	PPA41099	3.1e-32	Serpentine
7TM_GPCR_Str|PF10326.10	PPA41103	7.5e-11	Serpentine
7TM_GPCR_Str|PF10326.10	PPA41109	3.1e-54	Serpentine
7TM_GPCR_Str|PF10326.10	PPA41120	9e-32	Serpentine
7TM_GPCR_Str|PF10326.10	PPA41131	1.8e-25	Serpentine
7TM_GPCR_Str|PF10326.10	PPA41133	1.2e-42	Serpentine
7TM_GPCR_Str|PF10326.10	PPA41137	5.8e-11	Serpentine
7TM_GPCR_Str|PF10326.10	PPA41156	2.3e-13	Serpentine
7TM_GPCR_Str|PF10326.10	PPA41157	7.9e-07	Serpentine
7TM_GPCR_Str|PF10326.10	PPA41178	6.3e-38	Serpentine
7TM_GPCR_Str|PF10326.10	PPA41180	8.2e-12	Serpentine
7TM_GPCR_Str|PF10326.10	PPA41200	4.5e-29	Serpentine
7TM_GPCR_Str|PF10326.10	PPA41228	3.9e-70	Serpentine
7TM_GPCR_Str|PF10326.10	PPA41229	2.4e-39	Serpentine
7TM_GPCR_Str|PF10326.10	PPA41245	3.8e-33	Serpentine
7TM_GPCR_Str|PF10326.10	PPA41246	2.3e-17	Serpentine
7TM_GPCR_Str|PF10326.10	PPA41276	3.7e-14	Serpentine
7TM_GPCR_Str|PF10326.10	PPA41291	4.2e-33	Serpentine
7TM_GPCR_Str|PF10326.10	PPA41297	4.2e-33	Serpentine
7TM_GPCR_Str|PF10326.10	PPA41299	7.5e-33	Serpentine
7TM_GPCR_Str|PF10326.10	PPA41310	3.3e-34	Serpentine
7TM_GPCR_Str|PF10326.10	PPA41315	1.5e-38	Serpentine
7TM_GPCR_Str|PF10326.10	PPA41318	6.8e-29	Serpentine
7TM_GPCR_Str|PF10326.10	PPA41327	2e-35	Serpentine
7TM_GPCR_Str|PF10326.10	PPA41362	9.4e-26	Serpentine
7TM_GPCR_Str|PF10326.10	PPA41369	1.4e-42	Serpentine
7TM_GPCR_Str|PF10326.10	PPA41375	1.3e-18	Serpentine
7TM_GPCR_Str|PF10326.10	PPA41394	5.9e-52	Serpentine
7TM_GPCR_Str|PF10326.10	PPA41399	4.4e-19	Serpentine
7TM_GPCR_Str|PF10326.10	PPA41441	8.9e-10	Serpentine
7TM_GPCR_Str|PF10326.10	PPA41444	6.8e-142	Serpentine
7TM_GPCR_Str|PF10326.10	PPA41445	4.1e-18	Serpentine
7TM_GPCR_Str|PF10326.10	PPA41452	2.4e-07	Serpentine
7TM_GPCR_Str|PF10326.10	PPA41454	3.9e-26	Serpentine
7TM_GPCR_Str|PF10326.10	PPA41466	1.3e-17	Serpentine
7TM_GPCR_Str|PF10326.10	PPA41485	1.2e-19	Serpentine
7TM_GPCR_Str|PF10326.10	PPA41494	1.3e-11	Serpentine
7TM_GPCR_Str|PF10326.10	PPA41498	9.4e-45	Serpentine
7TM_GPCR_Str|PF10326.10	PPA41524	2.1e-34	Serpentine
7TM_GPCR_Str|PF10326.10	PPA41534	1.9e-38	Serpentine
7TM_GPCR_Str|PF10326.10	PPA41579	8e-35	Serpentine
7TM_GPCR_Str|PF10326.10	PPA41592	1.5e-24	Serpentine
7TM_GPCR_Str|PF10326.10	PPA41617	2.5e-07	Serpentine
7TM_GPCR_Str|PF10326.10	PPA41654	1.5e-16	Serpentine
7TM_GPCR_Str|PF10326.10	PPA41667	4.2e-05	Serpentine
7TM_GPCR_Str|PF10326.10	PPA41671	5.7e-08	Serpentine
7TM_GPCR_Str|PF10326.10	PPA41684	1.4e-14	Serpentine
7TM_GPCR_Str|PF10326.10	PPA41685	1.2e-15	Serpentine
7TM_GPCR_Str|PF10326.10	PPA41688	9.2e-15	Serpentine
7TM_GPCR_Str|PF10326.10	PPA41699	1e-12	Serpentine
7TM_GPCR_Str|PF10326.10	PPA41700	9.4e-27	Serpentine
7TM_GPCR_Str|PF10326.10	PPA41703	9.2e-18	Serpentine
7TM_GPCR_Str|PF10326.10	PPA41705	6.4e-11	Serpentine
7TM_GPCR_Str|PF10326.10	PPA41706	1.5e-35	Serpentine
7TM_GPCR_Str|PF10326.10	PPA41715	1.9e-16	Serpentine
7TM_GPCR_Str|PF10326.10	PPA41732	6.4e-48	Serpentine
7TM_GPCR_Str|PF10326.10	PPA41734	1.1e-32	Serpentine
7TM_GPCR_Str|PF10326.10	PPA41735	1e-13	Serpentine
7TM_GPCR_Str|PF10326.10	PPA41741	0.00016	Serpentine
7TM_GPCR_Str|PF10326.10	PPA41781	2.3e-32	Serpentine
7TM_GPCR_Str|PF10326.10	PPA41786	1.7e-11	Serpentine
7TM_GPCR_Str|PF10326.10	PPA42115	3.5e-23	Serpentine
7TM_GPCR_Str|PF10326.10	PPA42264	1.5e-20	Serpentine
7TM_GPCR_Str|PF10326.10	PPA42266	3.6e-32	Serpentine
7TM_GPCR_Str|PF10326.10	PPA42345	2.2e-45	Serpentine
7TM_GPCR_Str|PF10326.10	PPA42411	2.6e-09	Serpentine
7TM_GPCR_Str|PF10326.10	PPA42457	5.5e-42	Serpentine
7TM_GPCR_Str|PF10326.10	PPA42466	3.9e-44	Serpentine
7TM_GPCR_Str|PF10326.10	PPA42518	3.4e-10	Serpentine
7TM_GPCR_Str|PF10326.10	PPA42748	1.4e-07	Serpentine
7TM_GPCR_Str|PF10326.10	PPA42780	2.2e-42	Serpentine
7TM_GPCR_Str|PF10326.10	PPA43001	3.4e-52	Serpentine
7TM_GPCR_Str|PF10326.10	PPA43033	2.5e-27	Serpentine
7TM_GPCR_Str|PF10326.10	PPA43196	3.1e-32	Serpentine
7TM_GPCR_Str|PF10326.10	PPA43407	6.6e-46	Serpentine
7TM_GPCR_Str|PF10326.10	PPA45128	3.9e-17	Serpentine
7TM_GPCR_Str|PF10326.10	PPA45319	2.2e-29	Serpentine
7TM_GPCR_Str|PF10326.10	PPA45556	4e-34	Serpentine
7TM_GPCR_Str|PF10326.10	PPA45595	3.5e-10	Serpentine
7TM_GPCR_Str|PF10326.10	PPA45602	0.0028	Serpentine
7TM_GPCR_Str|PF10326.10	PPA45650	0.0002	Serpentine
7TM_GPCR_Str|PF10326.10	PPA45723	0.00033	Serpentine
7TM_GPCR_Str|PF10326.10	PPA46000	1.6e-40	Serpentine
7TM_GPCR_Str|PF10326.10	UMM-S2840-1.59-mRNA-1_2	8.7e-17	Serpentine
7TM_GPCR_Str|PF10326.10	UMM-S2840-1.59-mRNA-1_3	2.2e-07	Serpentine
7TM_GPCR_Str|PF10326.10	UMM-S2840-1.59-mRNA-1_5	6.1e-30	Serpentine
7TM_GPCR_Str|PF10326.10	UMM-S2840-1.59-mRNA-1_6	7.2e-26	Serpentine
7TM_GPCR_Str|PF10326.10	UMM-S2840-1.59-mRNA-1_7	6.6e-50	Serpentine
7TM_GPCR_Str|PF10326.10	UMM-S2840-7.40-mRNA-1_frag2	3e-12	Serpentine
7TM_GPCR_Str|PF10326.10	UMM-S2868-24.23-mRNA-1_frag_4	4.8e-42	Serpentine
7TM_GPCR_Str|PF10326.10	UMM-S398-3.4-mRNA-1_remaining	1e-36	Serpentine
7TMR-HDED|PF07697.12	PPA40160	0.00029	7TM-HD
A_deamin|PF02137.19	PPA43241	1e-77	Adenosine-deaminase
A_deaminase|PF00962.23	ppa_stranded_DN25186_c0_g1_i2	1.4e-62	Adenosine/AMP
A_deaminase|PF00962.23	ppa_stranded_DN28168_c0_g2_i2	3.8e-61	Adenosine/AMP
A_deaminase|PF00962.23	PPA24977	1.9e-102	Adenosine/AMP
A2M|PF00207.23	PPA08735	9.9e-12	Alpha-2-macroglobulin
AA_kinase|PF00696.29	PPA20337	3.8e-41	Amino
AA_permease_2|PF13520.7	Contig33-snapTAU.36	1.7e-87	Amino
AA_permease_2|PF13520.7	Iso_D.4640.1	1.7e-44	Amino
AA_permease_2|PF13520.7	ppa_stranded_DN19929_c1_g1_i1	3.5e-61	Amino
AA_permease_2|PF13520.7	ppa_stranded_DN28958_c0_g1_i2	2.1e-43	Amino
AA_permease_2|PF13520.7	ppa_stranded_DN31271_c1_g1_i2	6.7e-33	Amino
AA_permease_2|PF13520.7	ppa_stranded_DN31271_c3_g1_i3	6.2e-42	Amino
AA_permease_2|PF13520.7	ppa_stranded_DN48458_c0_g1_i1	4e-11	Amino
AA_permease_2|PF13520.7	PPA06723	1.1e-60	Amino
AA_permease_2|PF13520.7	PPA07769	9.8e-37	Amino
AA_permease_2|PF13520.7	PPA16147	7.9e-41	Amino
AA_permease_2|PF13520.7	PPA20668	2.5e-60	Amino
AA_permease_C|PF13906.7	ppa_stranded_DN31271_c2_g2_i1	5.7e-18	C-terminus
AA_permease|PF00324.22	ppa_stranded_DN25032_c0_g1_i1	5.5e-58	Amino
AA_permease|PF00324.22	ppa_stranded_DN25032_c2_g1_i1	4.3e-65	Amino
AA_permease|PF00324.22	ppa_stranded_DN27778_c1_g1_i1	2.9e-68	Amino
AA_permease|PF00324.22	PPA03350	3.1e-59	Amino
AA_permease|PF00324.22	PPA28162	8.5e-37	Amino
Aa_trans|PF01490.19	Contig60-snapTAU.82	4.8e-43	Transmembrane
Aa_trans|PF01490.19	Iso_D.11992.1	3.7e-22	Transmembrane
Aa_trans|PF01490.19	ppa_stranded_DN24674_c0_g1_i1	5.4e-67	Transmembrane
Aa_trans|PF01490.19	ppa_stranded_DN24800_c0_g1_i1	3.3e-19	Transmembrane
Aa_trans|PF01490.19	ppa_stranded_DN25678_c0_g1_i1	2.9e-64	Transmembrane
Aa_trans|PF01490.19	ppa_stranded_DN25678_c0_g2_i2	2.9e-57	Transmembrane
Aa_trans|PF01490.19	ppa_stranded_DN27332_c0_g2_i1	2.6e-77	Transmembrane
Aa_trans|PF01490.19	ppa_stranded_DN27690_c0_g1_i2	1.3e-31	Transmembrane
Aa_trans|PF01490.19	ppa_stranded_DN29191_c0_g2_i1	4.5e-53	Transmembrane
Aa_trans|PF01490.19	ppa_stranded_DN30641_c0_g1_i3	8.1e-86	Transmembrane
Aa_trans|PF01490.19	PPA03602	3.7e-59	Transmembrane
Aa_trans|PF01490.19	PPA10150	3.7e-57	Transmembrane
Aa_trans|PF01490.19	PPA24621	4.1e-78	Transmembrane
Aa_trans|PF01490.19	PPA40043	2.7e-58	Transmembrane
AAA_11|PF13086.7	ppa_stranded_DN30062_c3_g1_i2	8.2e-11	AAA
AAA_11|PF13086.7	PPA28302	6e-13	AAA
AAA_12|PF13087.7	Contig24-snapTAU.289	2.7e-22	AAA
AAA_12|PF13087.7	Contig27-snapTAU.201	5.6e-51	AAA
AAA_12|PF13087.7	Contig27-snapTAU.202	0.001	AAA
AAA_12|PF13087.7	Contig27-snapTAU.206	8.3e-26	AAA
AAA_12|PF13087.7	ppa_stranded_DN23120_c0_g1_i3	7.9e-23	AAA
AAA_12|PF13087.7	ppa_stranded_DN24655_c0_g4_i2	2.2e-28	AAA
AAA_12|PF13087.7	ppa_stranded_DN27083_c0_g1_i10	3.4e-23	AAA
AAA_12|PF13087.7	ppa_stranded_DN29559_c0_g1_i1	1e-28	AAA
AAA_12|PF13087.7	ppa_stranded_DN30062_c4_g2_i1	1.9e-26	AAA
AAA_12|PF13087.7	ppa_stranded_DN31425_c5_g2_i9	5.3e-28	AAA
AAA_12|PF13087.7	PPA00450	2.7e-36	AAA
AAA_12|PF13087.7	PPA10552	3.6e-23	AAA
AAA_12|PF13087.7	PPA13399	6.7e-11	AAA
AAA_12|PF13087.7	PPA18411	9.1e-27	AAA
AAA_12|PF13087.7	PPA23910	1e-24	AAA
AAA_12|PF13087.7	PPA24265	4e-23	AAA
AAA_12|PF13087.7	PPA33709	1.4e-25	AAA
AAA_12|PF13087.7	PPA33710	3.5e-25	AAA
AAA_12|PF13087.7	PPA33963	1e-27	AAA
AAA_12|PF13087.7	PPA38896	1.1e-28	AAA
AAA_12|PF13087.7	PPA40551	0.0056	AAA
AAA_12|PF13087.7	PPA42655	1.8e-15	AAA
AAA_12|PF13087.7	PPA42656	1.8e-15	AAA
AAA_12|PF13087.7	PPA42657	6.4e-28	AAA
AAA_12|PF13087.7	PPA44247	2.6e-14	AAA
AAA_12|PF13087.7	PPA46104	2.6e-14	AAA
AAA_12|PF13087.7	PPA46105	2.6e-14	AAA
AAA_12|PF13087.7	PPA46106	2.6e-14	AAA
AAA_12|PF13087.7	PPA46107	6.4e-12	AAA
AAA_12|PF13087.7	PPA46109	1e-08	AAA
AAA_12|PF13087.7	PPA46110	2.6e-14	AAA
AAA_12|PF13087.7	PPA46111	7.5e-12	AAA
AAA_12|PF13087.7	UMM-S2850-1.52-mRNA-1_middle1	1.9e-24	AAA
AAA_12|PF13087.7	UMM-S2850-1.52-mRNA-1_middle2	2.9e-22	AAA
AAA_12|PF13087.7	UMM-S397-3.11-mRNA-1_frag_1	1.6e-43	AAA
AAA_16|PF13191.7	PPA39433	0.0011	AAA
AAA_18|PF13238.7	ppa_stranded_DN32844_c0_g1_i1	2.3e-27	AAA
AAA_2|PF07724.15	PPA07442	3.1e-40	AAA
AAA_21|PF13304.7	PPA20762	2.4e-05	AAA
AAA_22|PF13401.7	ppa_stranded_DN21782_c0_g1_i1	2.6e-11	AAA
AAA_22|PF13401.7	PPA38278	0.0065	AAA
AAA_22|PF13401.7	PPA42446	0.0065	AAA
AAA_23|PF13476.7	ppa_stranded_DN25727_c0_g1_i3	1.9e-15	AAA
AAA_23|PF13476.7	PPA39911	5.7e-05	AAA
AAA_25|PF13481.7	ppa_stranded_DN25276_c0_g1_i1	3.2e-22	AAA
AAA_28|PF13521.7	PPA38195	8.6e-20	AAA
AAA_28|PF13521.7	PPA45223	6.8e-21	AAA
AAA_30|PF13604.7	ppa_stranded_DN31425_c5_g2_i5	0.0043	AAA
AAA_30|PF13604.7	PPA25789	0.0088	AAA
AAA_32|PF13654.7	ppa_stranded_DN16794_c0_g1_i1	0.0085	AAA
AAA_33|PF13671.7	ppa_stranded_DN25309_c0_g2_i1	4.9e-13	AAA
AAA_33|PF13671.7	PPA22484	6.2e-22	AAA
AAA_34|PF13872.7	PPA12165	1.3e-115	P-loop
AAA_5|PF07728.15	ppa_stranded_DN30366_c0_g1_i7	1.1e-111	AAA
AAA_5|PF07728.15	PPA36980	4.2e-95	AAA
AAA_6|PF12774.8	PPA11202	2.8e-131	Hydrolytic
AAA|PF00004.30	Contig35-snap.98	7.4e-44	ATPase
AAA|PF00004.30	isopolya.7179.1	1.3e-39	ATPase
AAA|PF00004.30	ppa_stranded_DN19890_c0_g1_i1	2.8e-38	ATPase
AAA|PF00004.30	ppa_stranded_DN19977_c0_g1_i2	9.5e-30	ATPase
AAA|PF00004.30	ppa_stranded_DN25055_c0_g1_i2	2.1e-50	ATPase
AAA|PF00004.30	ppa_stranded_DN25887_c0_g1_i2	1.1e-48	ATPase
AAA|PF00004.30	ppa_stranded_DN27631_c0_g1_i1	1.8e-39	ATPase
AAA|PF00004.30	ppa_stranded_DN29072_c3_g1_i1	3.4e-42	ATPase
AAA|PF00004.30	ppa_stranded_DN29078_c0_g1_i1	9.6e-55	ATPase
AAA|PF00004.30	ppa_stranded_DN31157_c1_g2_i2	3.7e-43	ATPase
AAA|PF00004.30	ppa_stranded_DN31427_c4_g1_i1	7.5e-10	ATPase
AAA|PF00004.30	ppa_stranded_DN31654_c1_g14_i3	7.4e-44	ATPase
AAA|PF00004.30	PPA04621	1.8e-37	ATPase
AAA|PF00004.30	PPA04878	4.1e-42	ATPase
AAA|PF00004.30	PPA05290	2.3e-59	ATPase
AAA|PF00004.30	PPA08185	3.1e-94	ATPase
AAA|PF00004.30	PPA13306	2.1e-05	ATPase
AAA|PF00004.30	PPA18978	9.4e-96	ATPase
AAA|PF00004.30	PPA31328	2.4e-82	ATPase
AAA|PF00004.30	PPA33673	9.5e-42	ATPase
AAA|PF00004.30	PPA37355	1.4e-39	ATPase
AAA|PF00004.30	PPA37721	8.6e-09	ATPase
AAA|PF00004.30	PPA40456	2.9e-44	ATPase
AAA|PF00004.30	PPA42103	5.8e-41	ATPase
AAA|PF00004.30	PPA42106	5.4e-41	ATPase
AAR2|PF05282.12	PPA40120	3.8e-90	AAR2
ABA_GPCR|PF12430.9	ppa_stranded_DN18301_c0_g1_i1	2.7e-39	Abscisic
ABC_membrane_2|PF06472.16	ppa_stranded_DN19421_c0_g1_i1	3.9e-89	ABC
ABC_membrane_2|PF06472.16	ppa_stranded_DN23502_c0_g2_i2	1.1e-51	ABC
ABC_membrane_2|PF06472.16	PPA11598	1.5e-72	ABC
ABC_membrane_2|PF06472.16	PPA23452	3.3e-61	ABC
ABC_membrane|PF00664.24	Contig0-snapTAU.703	1.9e-37	ABC
ABC_membrane|PF00664.24	Iso_D.9987.1	2.2e-23	ABC
ABC_membrane|PF00664.24	ppa_stranded_DN11659_c0_g2_i1	5.4e-39	ABC
ABC_membrane|PF00664.24	ppa_stranded_DN15635_c0_g1_i1	4.7e-08	ABC
ABC_membrane|PF00664.24	ppa_stranded_DN19212_c0_g1_i1	3.8e-64	ABC
ABC_membrane|PF00664.24	ppa_stranded_DN20810_c1_g1_i1	3.4e-18	ABC
ABC_membrane|PF00664.24	ppa_stranded_DN23155_c0_g1_i1	2.2e-67	ABC
ABC_membrane|PF00664.24	ppa_stranded_DN25275_c0_g1_i2	1.7e-72	ABC
ABC_membrane|PF00664.24	ppa_stranded_DN29549_c0_g1_i4	1.4e-87	ABC
ABC_membrane|PF00664.24	ppa_stranded_DN29924_c0_g1_i2	3.6e-23	ABC
ABC_membrane|PF00664.24	ppa_stranded_DN30619_c0_g2_i3	3.9e-73	ABC
ABC_membrane|PF00664.24	ppa_stranded_DN30714_c0_g1_i4	1.3e-45	ABC
ABC_membrane|PF00664.24	ppa_stranded_DN31043_c2_g1_i1	3.9e-29	ABC
ABC_membrane|PF00664.24	ppa_stranded_DN31379_c1_g2_i1	2e-120	ABC
ABC_membrane|PF00664.24	ppa_stranded_DN31643_c1_g1_i1	1.1e-29	ABC
ABC_membrane|PF00664.24	ppa_stranded_DN31643_c2_g1_i4	3e-35	ABC
ABC_membrane|PF00664.24	ppa_stranded_DN31654_c0_g1_i1	1.6e-58	ABC
ABC_membrane|PF00664.24	PPA00989	4.2e-40	ABC
ABC_membrane|PF00664.24	PPA06384	3.1e-56	ABC
ABC_membrane|PF00664.24	PPA09633	1.3e-78	ABC
ABC_membrane|PF00664.24	PPA14180	1.8e-48	ABC
ABC_membrane|PF00664.24	PPA15485	1.9e-66	ABC
ABC_membrane|PF00664.24	PPA16516	8.1e-45	ABC
ABC_membrane|PF00664.24	PPA17188	1.5e-112	ABC
ABC_membrane|PF00664.24	PPA17668	6.8e-68	ABC
ABC_membrane|PF00664.24	PPA20782	1.7e-33	ABC
ABC_membrane|PF00664.24	PPA25211	7.8e-110	ABC
ABC_membrane|PF00664.24	PPA25269	1.1e-73	ABC
ABC_membrane|PF00664.24	PPA26346	7.9e-55	ABC
ABC_membrane|PF00664.24	PPA28099	2.2e-85	ABC
ABC_membrane|PF00664.24	PPA35341	3.8e-89	ABC
ABC_membrane|PF00664.24	PPA35633	2.9e-53	ABC
ABC_membrane|PF00664.24	PPA36210	3.4e-67	ABC
ABC_membrane|PF00664.24	PPA38604	4.2e-46	ABC
ABC_membrane|PF00664.24	PPA39160	4.1e-76	ABC
ABC_membrane|PF00664.24	PPA39682	1e-36	ABC
ABC_membrane|PF00664.24	PPA40371	5.5e-75	ABC
ABC_membrane|PF00664.24	PPA40536	4.4e-70	ABC
ABC_membrane|PF00664.24	PPA41922	2.9e-27	ABC
ABC_membrane|PF00664.24	PPA46397	1.6e-56	ABC
ABC_tran|PF00005.28	Contig12-snapTAU.140	1.9e-72	ABC
ABC_tran|PF00005.28	Contig33-snapTAU.189	6e-72	ABC
ABC_tran|PF00005.28	Iso_D.10526.1	2.3e-69	ABC
ABC_tran|PF00005.28	Iso_D.7605.5	0.0026	ABC
ABC_tran|PF00005.28	Iso_D.7792.1	1.9e-49	ABC
ABC_tran|PF00005.28	Iso_D.9967.1	1.8e-33	ABC
ABC_tran|PF00005.28	ppa_stranded_DN18985_c0_g1_i1	1.4e-37	ABC
ABC_tran|PF00005.28	ppa_stranded_DN21487_c1_g1_i1	1e-32	ABC
ABC_tran|PF00005.28	ppa_stranded_DN24187_c0_g1_i2	1.8e-34	ABC
ABC_tran|PF00005.28	ppa_stranded_DN25123_c0_g1_i1	6.8e-40	ABC
ABC_tran|PF00005.28	ppa_stranded_DN26758_c0_g2_i1	4.1e-56	ABC
ABC_tran|PF00005.28	ppa_stranded_DN26766_c0_g1_i1	9.6e-05	ABC
ABC_tran|PF00005.28	ppa_stranded_DN29144_c0_g2_i1	3e-35	ABC
ABC_tran|PF00005.28	ppa_stranded_DN29949_c0_g1_i5	1e-17	ABC
ABC_tran|PF00005.28	ppa_stranded_DN30714_c0_g1_i1	3.4e-36	ABC
ABC_tran|PF00005.28	ppa_stranded_DN30924_c0_g1_i1	1.1e-73	ABC
ABC_tran|PF00005.28	ppa_stranded_DN31043_c6_g2_i1	7.2e-69	ABC
ABC_tran|PF00005.28	ppa_stranded_DN31043_c6_g2_i2	1.4e-68	ABC
ABC_tran|PF00005.28	PPA00336	4.4e-48	ABC
ABC_tran|PF00005.28	PPA01242	5.1e-53	ABC
ABC_tran|PF00005.28	PPA02116	1.9e-08	ABC
ABC_tran|PF00005.28	PPA04003	1.1e-56	ABC
ABC_tran|PF00005.28	PPA05691	2.3e-47	ABC
ABC_tran|PF00005.28	PPA08573	5.7e-67	ABC
ABC_tran|PF00005.28	PPA11406	2.5e-31	ABC
ABC_tran|PF00005.28	PPA14427	3.7e-34	ABC
ABC_tran|PF00005.28	PPA18570	4.4e-13	ABC
ABC_tran|PF00005.28	PPA20763	5e-46	ABC
ABC_tran|PF00005.28	PPA23013	1.6e-49	ABC
ABC_tran|PF00005.28	PPA23730	9.6e-65	ABC
ABC_tran|PF00005.28	PPA24272	8.7e-71	ABC
ABC_tran|PF00005.28	PPA28509	3.1e-46	ABC
ABC_tran|PF00005.28	PPA36779	3e-45	ABC
ABC_tran|PF00005.28	PPA37954	2.5e-37	ABC
ABC_tran|PF00005.28	PPA38832	6e-37	ABC
ABC_tran|PF00005.28	PPA39273	1.1e-19	ABC
ABC_tran|PF00005.28	PPA39907	7.8e-72	ABC
ABC_tran|PF00005.28	PPA40642	9.3e-56	ABC
ABC_tran|PF00005.28	PPA41523	2.4e-11	ABC
ABC_tran|PF00005.28	PPA41783	1.2e-31	ABC
ABC_tran|PF00005.28	PPA41932	2e-82	ABC
ABC_tran|PF00005.28	PPA42390	4.7e-30	ABC
ABC_tran|PF00005.28	PPA42723	1.4e-33	ABC
ABC_tran|PF00005.28	PPA42788	3.5e-70	ABC
ABC_tran|PF00005.28	PPA43426	7.8e-60	ABC
ABC_tran|PF00005.28	UMM-S2838-33.13-mRNA-1_remaining	2.6e-52	ABC
ABC1|PF03109.17	ppa_stranded_DN28040_c0_g2_i1	7.3e-17	ABC1
ABC1|PF03109.17	PPA13996	1.6e-38	ABC1
ABC1|PF03109.17	PPA14158	2.3e-34	ABC1
ABC1|PF03109.17	PPA41041	1.5e-33	ABC1
ABC2_membrane_3|PF12698.8	ppa_stranded_DN26766_c1_g1_i1	2.7e-17	ABC-2
ABC2_membrane_3|PF12698.8	PPA01967	2e-45	ABC-2
ABC2_membrane_3|PF12698.8	PPA07652	7.9e-55	ABC-2
ABC2_membrane|PF01061.25	ppa_stranded_DN21105_c0_g1_i1	2.1e-34	ABC-2
ABC2_membrane|PF01061.25	ppa_stranded_DN23521_c0_g1_i1	3.3e-36	ABC-2
ABC2_membrane|PF01061.25	ppa_stranded_DN25337_c0_g1_i2	2.4e-11	ABC-2
ABC2_membrane|PF01061.25	ppa_stranded_DN27510_c0_g1_i1	7.4e-39	ABC-2
ABC2_membrane|PF01061.25	ppa_stranded_DN29992_c1_g3_i2	3.1e-41	ABC-2
ABC2_membrane|PF01061.25	PPA38594	3.4e-37	ABC-2
Abhydro_lipase|PF04083.17	ppa_stranded_DN20458_c0_g1_i2	5.2e-14	Partial
Abhydro_lipase|PF04083.17	ppa_stranded_DN21912_c0_g2_i1	3.1e-22	Partial
Abhydro_lipase|PF04083.17	ppa_stranded_DN24017_c0_g1_i1	6.3e-21	Partial
Abhydro_lipase|PF04083.17	ppa_stranded_DN24327_c0_g3_i3	1.5e-20	Partial
Abhydro_lipase|PF04083.17	ppa_stranded_DN29594_c0_g2_i2	3.6e-21	Partial
Abhydro_lipase|PF04083.17	ppa_stranded_DN31160_c0_g3_i4	4.4e-25	Partial
Abhydro_lipase|PF04083.17	PPA01348	1.2e-18	Partial
Abhydro_lipase|PF04083.17	PPA03378	5.1e-20	Partial
Abhydro_lipase|PF04083.17	PPA05483	2.8e-20	Partial
Abhydro_lipase|PF04083.17	PPA06633	3.2e-16	Partial
Abhydro_lipase|PF04083.17	PPA13031	1.5e-23	Partial
Abhydro_lipase|PF04083.17	PPA14232	5.6e-27	Partial
Abhydro_lipase|PF04083.17	PPA16085	7.6e-20	Partial
Abhydro_lipase|PF04083.17	PPA24295	2.3e-43	Partial
Abhydro_lipase|PF04083.17	PPA24578	1.1e-19	Partial
Abhydro_lipase|PF04083.17	PPA26094	1.2e-19	Partial
Abhydro_lipase|PF04083.17	PPA27034	3.8e-15	Partial
Abhydro_lipase|PF04083.17	PPA29607	4e-20	Partial
Abhydro_lipase|PF04083.17	PPA30987	1e-13	Partial
Abhydro_lipase|PF04083.17	PPA32039	9e-18	Partial
Abhydro_lipase|PF04083.17	PPA34675	5.9e-19	Partial
Abhydro_lipase|PF04083.17	PPA35075	6.1e-20	Partial
Abhydro_lipase|PF04083.17	PPA35843	7e-20	Partial
Abhydro_lipase|PF04083.17	PPA36824	2e-17	Partial
Abhydro_lipase|PF04083.17	PPA40787	5.4e-46	Partial
Abhydro_lipase|PF04083.17	PPA40971	1.3e-34	Partial
Abhydro_lipase|PF04083.17	PPA41614	1e-18	Partial
Abhydrolase_1|PF00561.21	Contig10-snapTAU.135	1.1e-22	alpha/beta
Abhydrolase_1|PF00561.21	ppa_stranded_DN12053_c0_g1_i1	1.2e-07	alpha/beta
Abhydrolase_1|PF00561.21	ppa_stranded_DN18170_c0_g2_i1	3e-20	alpha/beta
Abhydrolase_1|PF00561.21	ppa_stranded_DN30729_c0_g1_i2	1.2e-28	alpha/beta
Abhydrolase_1|PF00561.21	ppa_stranded_DN30729_c0_g3_i3	1.5e-27	alpha/beta
Abhydrolase_1|PF00561.21	ppa_stranded_DN31126_c0_g1_i1	7e-12	alpha/beta
Abhydrolase_1|PF00561.21	ppa_stranded_DN31126_c0_g1_i2	2e-08	alpha/beta
Abhydrolase_1|PF00561.21	PPA03757	3.3e-24	alpha/beta
Abhydrolase_1|PF00561.21	PPA06092	1.2e-13	alpha/beta
Abhydrolase_1|PF00561.21	PPA06346	2.8e-21	alpha/beta
Abhydrolase_1|PF00561.21	PPA06647	0.0017	alpha/beta
Abhydrolase_1|PF00561.21	PPA12732	7.9e-08	alpha/beta
Abhydrolase_1|PF00561.21	PPA15448	3.1e-16	alpha/beta
Abhydrolase_1|PF00561.21	PPA16683	4e-19	alpha/beta
Abhydrolase_1|PF00561.21	PPA18564	2.6e-11	alpha/beta
Abhydrolase_1|PF00561.21	PPA21978	2.3e-32	alpha/beta
Abhydrolase_1|PF00561.21	PPA34211	1.4e-23	alpha/beta
Abhydrolase_1|PF00561.21	PPA40501	1.2e-16	alpha/beta
Abhydrolase_1|PF00561.21	PPA40601	7.9e-16	alpha/beta
Abhydrolase_1|PF00561.21	PPA40603	6.1e-15	alpha/beta
Abhydrolase_1|PF00561.21	PPA40876	8.7e-19	alpha/beta
Abhydrolase_1|PF00561.21	PPA41469	3.6e-15	alpha/beta
Abhydrolase_1|PF00561.21	PPA41473	7.9e-15	alpha/beta
Abhydrolase_2|PF02230.17	ppa_stranded_DN10378_c0_g1_i1	2.8e-63	Phospholipase/Carboxylesterase
Abhydrolase_3|PF07859.14	Contig18-snapTAU.46	5.8e-51	alpha/beta
Abhydrolase_3|PF07859.14	Contig45-snapTAU.44	1.2e-18	alpha/beta
Abhydrolase_3|PF07859.14	Contig45-snapTAU.49	6.2e-52	alpha/beta
Abhydrolase_3|PF07859.14	Iso_D.2676.2	9.6e-57	alpha/beta
Abhydrolase_3|PF07859.14	ppa_stranded_DN23301_c0_g1_i1	2.8e-56	alpha/beta
Abhydrolase_3|PF07859.14	ppa_stranded_DN31438_c3_g1_i1	8e-11	alpha/beta
Abhydrolase_3|PF07859.14	ppa_stranded_DN37713_c0_g1_i1	0.0004	alpha/beta
Abhydrolase_3|PF07859.14	PPA43236	7.1e-07	alpha/beta
Abhydrolase_6|PF12697.8	Contig10-snapTAU.136	3.7e-22	Alpha/beta
Abhydrolase_6|PF12697.8	isopolya.4974.1	1.3e-27	Alpha/beta
Abhydrolase_6|PF12697.8	ppa_stranded_DN18410_c0_g2_i1	9.6e-18	Alpha/beta
Abhydrolase_6|PF12697.8	ppa_stranded_DN28346_c2_g1_i2	1.3e-08	Alpha/beta
Abhydrolase_6|PF12697.8	PPA14983	0.0051	Alpha/beta
Abi_HHR|PF07815.15	PPA06877	2.6e-25	Abl-interactor
ACAS_N|PF16177.6	PPA26699	4.3e-16	Acetyl-coenzyme
Acatn|PF13000.8	PPA34175	1.7e-107	Acetyl-coenzyme
ACBP|PF00887.20	ppa_stranded_DN26367_c0_g1_i1	3e-17	Acyl
ACBP|PF00887.20	ppa_stranded_DN50064_c0_g1_i1	2.8e-16	Acyl
ACBP|PF00887.20	ppa_stranded_DN9969_c0_g1_i1	2.3e-21	Acyl
ACBP|PF00887.20	PPA00807	1.2e-22	Acyl
ACBP|PF00887.20	PPA06616	5.1e-43	Acyl
ACBP|PF00887.20	PPA06621	2.5e-39	Acyl
ACBP|PF00887.20	PPA21676	9.4e-09	Acyl
ACBP|PF00887.20	PPA32010	9.2e-12	Acyl
ACBP|PF00887.20	PPA32202	6.5e-30	Acyl
ACBP|PF00887.20	PPA37646	3.9e-16	Acyl
ACBP|PF00887.20	PPA38216	4.1e-31	Acyl
AcetylCoA_hyd_C|PF13336.7	ppa_stranded_DN23985_c0_g1_i1	2.3e-57	Acetyl-CoA
AcetylCoA_hyd_C|PF13336.7	ppa_stranded_DN29971_c0_g1_i2	3.5e-58	Acetyl-CoA
AcetylCoA_hyd_C|PF13336.7	PPA05295	5.1e-05	Acetyl-CoA
AcetylCoA_hyd_C|PF13336.7	PPA16596	1.7e-05	Acetyl-CoA
AcetylCoA_hyd_C|PF13336.7	PPA34146	9.6e-05	Acetyl-CoA
AcetylCoA_hyd_C|PF13336.7	PPA35794	7.1e-05	Acetyl-CoA
AcetylCoA_hyd_C|PF13336.7	PPA35798	8.9e-05	Acetyl-CoA
AcetylCoA_hyd_C|PF13336.7	PPA36009	7.1e-05	Acetyl-CoA
AcetylCoA_hyd_C|PF13336.7	PPA36290	2.8e-05	Acetyl-CoA
AcetylCoA_hyd_C|PF13336.7	PPA40661	2.3e-05	Acetyl-CoA
Acetyltransf_1|PF00583.26	ppa_stranded_DN16451_c0_g1_i2	1.4e-12	Acetyltransferase
Acetyltransf_1|PF00583.26	ppa_stranded_DN18982_c0_g1_i1	0.0043	Acetyltransferase
Acetyltransf_1|PF00583.26	ppa_stranded_DN20546_c0_g2_i1	1.3e-11	Acetyltransferase
Acetyltransf_1|PF00583.26	ppa_stranded_DN23261_c0_g1_i1	9e-18	Acetyltransferase
Acetyltransf_1|PF00583.26	ppa_stranded_DN24531_c1_g1_i1	0.00049	Acetyltransferase
Acetyltransf_1|PF00583.26	ppa_stranded_DN26404_c0_g1_i1	9.7e-19	Acetyltransferase
Acetyltransf_1|PF00583.26	ppa_stranded_DN30044_c0_g1_i3	1.5e-10	Acetyltransferase
Acetyltransf_1|PF00583.26	ppa_stranded_DN39871_c0_g1_i1	3.4e-11	Acetyltransferase
Acetyltransf_1|PF00583.26	PPA04417	3.9e-14	Acetyltransferase
Acetyltransf_1|PF00583.26	PPA05542	4.4e-13	Acetyltransferase
Acetyltransf_1|PF00583.26	PPA06652	1.1e-06	Acetyltransferase
Acetyltransf_1|PF00583.26	PPA07749	1.3e-06	Acetyltransferase
Acetyltransf_1|PF00583.26	PPA16647	1.3e-14	Acetyltransferase
Acetyltransf_1|PF00583.26	PPA16997	1.7e-15	Acetyltransferase
Acetyltransf_1|PF00583.26	PPA17206	0.00074	Acetyltransferase
Acetyltransf_1|PF00583.26	PPA17415	1.9e-13	Acetyltransferase
Acetyltransf_1|PF00583.26	PPA22455	1.2e-11	Acetyltransferase
Acetyltransf_1|PF00583.26	PPA26031	0.0017	Acetyltransferase
Acetyltransf_1|PF00583.26	PPA29290	1.8e-16	Acetyltransferase
Acetyltransf_1|PF00583.26	PPA29510	2.8e-05	Acetyltransferase
Acetyltransf_1|PF00583.26	PPA31449	0.0034	Acetyltransferase
Acetyltransf_1|PF00583.26	PPA33627	6e-15	Acetyltransferase
Acetyltransf_1|PF00583.26	PPA34398	1.2e-11	Acetyltransferase
Acetyltransf_1|PF00583.26	PPA36744	0.00013	Acetyltransferase
Acetyltransf_1|PF00583.26	PPA38332	2.7e-09	Acetyltransferase
Acetyltransf_1|PF00583.26	PPA39225	4.2e-08	Acetyltransferase
Acetyltransf_1|PF00583.26	PPA42111	0.0019	Acetyltransferase
Acetyltransf_10|PF13673.8	PPA04433	5.5e-14	Acetyltransferase
Acetyltransf_13|PF13880.7	ppa_stranded_DN25124_c0_g2_i1	6.8e-19	ESCO1/2
Acetyltransf_16|PF05301.12	isototal.4691.1	1.1e-45	GNAT
Acetyltransf_16|PF05301.12	ppa_stranded_DN31281_c4_g1_i2	3.8e-54	GNAT
Acetyltransf_18|PF18014.2	PPA05795	0.00016	Acetyltransferase
Acetyltransf_18|PF18014.2	PPA22003	0.0013	Acetyltransferase
Acetyltransf_3|PF13302.8	PPA38023	1.1e-21	Acetyltransferase
Acetyltransf_7|PF13508.8	PPA16131	0.0016	Acetyltransferase
Acetyltransf_7|PF13508.8	PPA19043	0.0026	Acetyltransferase
Acetyltransf_7|PF13508.8	PPA25048	1.4e-09	Acetyltransferase
Acetyltransf_7|PF13508.8	PPA33817	4.6e-05	Acetyltransferase
Acetyltransf_7|PF13508.8	PPA40419	6.4e-06	Acetyltransferase
Acetyltransf_7|PF13508.8	PPA40646	0.00093	Acetyltransferase
Acetyltransf_CG|PF14542.7	PPA25554	5.9e-21	GCN5-related
AcnX|PF04412.14	PPA35068	0.0067	Aconitase
Aconitase|PF00330.21	PPA08125	4.5e-154	Aconitase
Aconitase|PF00330.21	PPA18699	4.6e-171	Aconitase
ACOX|PF01756.20	ppa_stranded_DN26828_c0_g1_i1	5.3e-34	Acyl-CoA
ACOX|PF01756.20	PPA00342	1e-48	Acyl-CoA
ACOX|PF01756.20	PPA12707	3.9e-50	Acyl-CoA
ACOX|PF01756.20	PPA21542	1.6e-35	Acyl-CoA
ACOX|PF01756.20	PPA23768	1.3e-48	Acyl-CoA
ACOX|PF01756.20	PPA28370	2.1e-48	Acyl-CoA
ACOX|PF01756.20	PPA37077	1.2e-89	Acyl-CoA
ACPS|PF01648.21	ppa_stranded_DN21010_c0_g1_i3	1.5e-15	4'-phosphopantetheinyl
ACPS|PF01648.21	ppa_stranded_DN25479_c0_g1_i1	1.3e-14	4'-phosphopantetheinyl
Actin_micro|PF17003.6	PPA18126	1.3e-05	Putative
Actin|PF00022.20	ppa_stranded_DN11203_c0_g1_i1	1.1e-32	Actin
Actin|PF00022.20	ppa_stranded_DN11203_c1_g1_i1	2.6e-22	Actin
Actin|PF00022.20	ppa_stranded_DN20653_c0_g1_i1	1.1e-88	Actin
Actin|PF00022.20	ppa_stranded_DN30846_c1_g3_i1	9.6e-46	Actin
Actin|PF00022.20	ppa_stranded_DN30977_c1_g3_i3	6.3e-150	Actin
Actin|PF00022.20	ppa_stranded_DN33910_c0_g1_i1	8.4e-41	Actin
Actin|PF00022.20	ppa_stranded_DN7357_c0_g1_i1	2e-123	Actin
Actin|PF00022.20	PPA07255	4.3e-42	Actin
Actin|PF00022.20	PPA09119	2.4e-150	Actin
Actin|PF00022.20	PPA14134	2.5e-105	Actin
Actin|PF00022.20	PPA29912	4.3e-42	Actin
Actin|PF00022.20	PPA33856	2.4e-150	Actin
Actin|PF00022.20	PPA35389	1.2e-129	Actin
Actin|PF00022.20	PPA37468	1.9e-150	Actin
Actin|PF00022.20	PPA37768	2.4e-150	Actin
Activator_LAG-3|PF11498.9	PPA18374	0.00055	Transcriptional
Activin_recp|PF01064.24	ppa_stranded_DN30799_c6_g1_i1	0.0048	Activin
Activin_recp|PF01064.24	PPA04365	2.7e-05	Activin
Activin_recp|PF01064.24	PPA11573	0.0028	Activin
Activin_recp|PF01064.24	PPA15573	1.4e-09	Activin
Activin_recp|PF01064.24	PPA20356	0.00085	Activin
Activin_recp|PF01064.24	PPA21716	3.1e-06	Activin
Activin_recp|PF01064.24	PPA30529	0.00043	Activin
Activin_recp|PF01064.24	PPA30837	0.00013	Activin
Activin_recp|PF01064.24	PPA35151	0.00036	Activin
Activin_recp|PF01064.24	PPA35347	0.0025	Activin
Activin_recp|PF01064.24	PPA38493	0.00052	Activin
Activin_recp|PF01064.24	PPA39421	0.0023	Activin
Activin_recp|PF01064.24	PPA40014	0.003	Activin
ACTL7A_N|PF16840.6	PPA30851	0.0047	Actin-like
ACTL7A_N|PF16840.6	PPA33759	0.0054	Actin-like
ACTL7A_N|PF16840.6	PPA33930	0.003	Actin-like
ACTL7A_N|PF16840.6	PPA34257	0.0056	Actin-like
ACTL7A_N|PF16840.6	PPA42343	0.0017	Actin-like
Acyl_CoA_thio|PF02551.16	PPA37295	0.0016	Acyl-CoA
Acyl_transf_1|PF00698.22	ppa_stranded_DN30164_c0_g1_i10	5.4e-15	Acyl
Acyl_transf_3|PF01757.23	Contig23-snapTAU.248	7.3e-09	Acyltransferase
Acyl_transf_3|PF01757.23	Contig78-snapTAU.116	4.5e-09	Acyltransferase
Acyl_transf_3|PF01757.23	Contig78-snapTAU.117	0.0035	Acyltransferase
Acyl_transf_3|PF01757.23	Contig79-snapTAU.69	5.3e-18	Acyltransferase
Acyl_transf_3|PF01757.23	Iso_D.4789.1	5e-25	Acyltransferase
Acyl_transf_3|PF01757.23	Iso_D.763.5	6.6e-29	Acyltransferase
Acyl_transf_3|PF01757.23	Iso_D.764.1	2.4e-27	Acyltransferase
Acyl_transf_3|PF01757.23	Iso_D.9799.1	1.4e-14	Acyltransferase
Acyl_transf_3|PF01757.23	ppa_stranded_DN23416_c0_g2_i2	9.5e-16	Acyltransferase
Acyl_transf_3|PF01757.23	ppa_stranded_DN23455_c1_g1_i1	5.2e-19	Acyltransferase
Acyl_transf_3|PF01757.23	ppa_stranded_DN26419_c0_g1_i1	3.6e-22	Acyltransferase
Acyl_transf_3|PF01757.23	ppa_stranded_DN27760_c0_g2_i1	2.5e-22	Acyltransferase
Acyl_transf_3|PF01757.23	ppa_stranded_DN28959_c0_g2_i2	7.5e-26	Acyltransferase
Acyl_transf_3|PF01757.23	ppa_stranded_DN4383_c0_g1_i1	3e-07	Acyltransferase
Acyl_transf_3|PF01757.23	ppa_stranded_DN44379_c0_g1_i1	3.9e-09	Acyltransferase
Acyl_transf_3|PF01757.23	ppa_stranded_DN7348_c0_g1_i1	6.3e-06	Acyltransferase
Acyl_transf_3|PF01757.23	ppa_stranded_DN8878_c0_g1_i1	3.6e-16	Acyltransferase
Acyl_transf_3|PF01757.23	PPA00589	1.6e-19	Acyltransferase
Acyl_transf_3|PF01757.23	PPA03154	7.5e-18	Acyltransferase
Acyl_transf_3|PF01757.23	PPA03683	1e-23	Acyltransferase
Acyl_transf_3|PF01757.23	PPA05159	3.6e-27	Acyltransferase
Acyl_transf_3|PF01757.23	PPA05602	8.1e-09	Acyltransferase
Acyl_transf_3|PF01757.23	PPA08462	1.1e-20	Acyltransferase
Acyl_transf_3|PF01757.23	PPA13659	2.8e-18	Acyltransferase
Acyl_transf_3|PF01757.23	PPA18883	1.3e-15	Acyltransferase
Acyl_transf_3|PF01757.23	PPA21931	6.6e-17	Acyltransferase
Acyl_transf_3|PF01757.23	PPA22230	4.2e-22	Acyltransferase
Acyl_transf_3|PF01757.23	PPA22373	9.9e-23	Acyltransferase
Acyl_transf_3|PF01757.23	PPA22614	7.1e-13	Acyltransferase
Acyl_transf_3|PF01757.23	PPA22911	8.3e-15	Acyltransferase
Acyl_transf_3|PF01757.23	PPA23466	9.4e-14	Acyltransferase
Acyl_transf_3|PF01757.23	PPA24817	5.9e-27	Acyltransferase
Acyl_transf_3|PF01757.23	PPA25790	0.0076	Acyltransferase
Acyl_transf_3|PF01757.23	PPA26589	6.4e-19	Acyltransferase
Acyl_transf_3|PF01757.23	PPA27459	1.5e-15	Acyltransferase
Acyl_transf_3|PF01757.23	PPA29277	8.7e-23	Acyltransferase
Acyl_transf_3|PF01757.23	PPA30023	1.7e-22	Acyltransferase
Acyl_transf_3|PF01757.23	PPA34229	6e-21	Acyltransferase
Acyl_transf_3|PF01757.23	PPA34769	1.7e-28	Acyltransferase
Acyl_transf_3|PF01757.23	PPA36822	8.2e-20	Acyltransferase
Acyl_transf_3|PF01757.23	PPA37736	7.3e-21	Acyltransferase
Acyl_transf_3|PF01757.23	PPA39886	1.1e-16	Acyltransferase
Acyl_transf_3|PF01757.23	PPA40001	3e-28	Acyltransferase
Acyl_transf_3|PF01757.23	PPA40843	9.7e-24	Acyltransferase
Acyl_transf_3|PF01757.23	PPA41033	7.8e-25	Acyltransferase
Acyl-CoA_dh_1|PF00441.25	Iso_D.4766.1	1.1e-30	Acyl-CoA
Acyl-CoA_dh_1|PF00441.25	isopolya.4326.3	1.3e-43	Acyl-CoA
Acyl-CoA_dh_1|PF00441.25	ppa_stranded_DN19286_c0_g1_i1	9.3e-48	Acyl-CoA
Acyl-CoA_dh_1|PF00441.25	ppa_stranded_DN19705_c0_g1_i1	4.1e-46	Acyl-CoA
Acyl-CoA_dh_1|PF00441.25	ppa_stranded_DN26369_c0_g1_i2	4.1e-27	Acyl-CoA
Acyl-CoA_dh_1|PF00441.25	ppa_stranded_DN29959_c0_g2_i3	7.4e-34	Acyl-CoA
Acyl-CoA_dh_1|PF00441.25	ppa_stranded_DN4683_c0_g1_i1	2.1e-44	Acyl-CoA
Acyl-CoA_dh_1|PF00441.25	PPA01555	7.3e-41	Acyl-CoA
Acyl-CoA_dh_1|PF00441.25	PPA07812	2.2e-38	Acyl-CoA
Acyl-CoA_dh_1|PF00441.25	PPA22404	1.4e-44	Acyl-CoA
Acyl-CoA_dh_1|PF00441.25	PPA27005	3.1e-26	Acyl-CoA
Acyl-CoA_dh_N|PF02771.17	PPA05031	2.9e-16	Acyl-CoA
Acyl-CoA_ox_N|PF14749.7	PPA37070	1.1e-21	Acyl-coenzyme
Acyltransf_C|PF16076.6	PPA00388	2.4e-11	Acyltransferase
Acyltransf_C|PF16076.6	PPA34632	4.3e-08	Acyltransferase
[truncated: 15,666 more rows]
