# Supplementary material for: Single worm transcriptomics identifies a developmental core network of oscillating genes with deep conservation across nematodes
Source: HighWire-hosted journal article supplement (doi:10.1101/gr.275303.121), 2021-07-22
Supplement: Supplemental_Table_S9.xlsx [file Supplemental_Table_S9.xlsx]

## Sheet: fv_14165.uniprot_annotation_in_
Supplemental Table S9 Uniprot annotation in P. pacificus
ppa_locus	WBgene	Uniport accession
Contig0-snapTAU.110	WBGene00017300	Q27492
Contig0-snapTAU.189	WBGene00008615	O45327
Contig0-snapTAU.703	WBGene00001813	O17895
Contig0-snapTAU.72	WBGene00004015	P50093
Contig0-snapTAU.780	WBGene00022200	Q9TZL9
Contig1-snapTAU.193	WBGene00018604	Q9GPA0
Contig1-snapTAU.376	WBGene00007784	O17607
Contig1-snapTAU.41	WBGene00003185	Q21307
Contig1-snapTAU.555	WBGene00019617	Q94269
Contig1-snapTAU.556	WBGene00019617	Q94269
Contig1-snapTAU.557	WBGene00019617	Q94269
Contig10-snap.103	WBGene00003572	P34322
Contig10-snap.215	WBGene00000776	O45734
Contig10-snap.216	WBGene00017015	Q18923
Contig10-snap.75	WBGene00003632	O76828
Contig10-snap.79	WBGene00003686	Q95X91
Contig10-snapTAU.135	WBGene00019329	G5EBI4
Contig10-snapTAU.136	WBGene00010628	G5EDL5
Contig10-snapTAU.145	WBGene00045255	A2V8C5
Contig10-snapTAU.360	WBGene00003080	Q95XN6
Contig10-snapTAU.441	WBGene00017885	A0A061AD00
Contig10-snapTAU.486	WBGene00000251	Q09457
Contig10-snapTAU.70	WBGene00005718	Q23041
Contig10-snapTAU.71	WBGene00019515	Q9TYY5
Contig10-snapTAU.91	WBGene00003682	Q95Y07
Contig100-snap.84	WBGene00004752	Q22706
Contig102-snapTAU.82	WBGene00004126	Q20576
Contig102-snapTAU.84	WBGene00020486	Q22461
Contig103-snapTAU.33	WBGene00007972	Q93339
Contig103-snapTAU.35	WBGene00007972	Q93339
Contig103-snapTAU.36	WBGene00007971	Q93338
Contig103-snapTAU.62	WBGene00000622	O01799
Contig103-snapTAU.7	WBGene00006728	P49632
Contig104-snapTAU.53	WBGene00000503	Q11174
Contig104-snapTAU.72	WBGene00001067	P91285
Contig104-snapTAU.73	WBGene00011681	Q22371
Contig104-snapTAU.98	WBGene00021216	Q9UAU2
Contig11-snap.31	WBGene00016975	Q18895
Contig11-snapTAU.104	WBGene00013088	Q9XXC1
Contig11-snapTAU.274	WBGene00022056	Q9BKQ8
Contig11-snapTAU.517	WBGene00044648	Q304F0
Contig11-snapTAU.525	WBGene00021753	Q9N3L4
Contig11-snapTAU.554	WBGene00017760	H2KZV4
Contig11-snapTAU.85	WBGene00000193	Q18510
Contig110-snapTAU.48	WBGene00005662	G5EF77
Contig112-snapTAU.8	WBGene00004481	P49196
Contig113-snapTAU.29	WBGene00005089	Q20721
Contig113-snapTAU.52	WBGene00044528	A0A168H3E7
Contig113-snapTAU.77_curated	WBGene00011356	Q22081
Contig116-snapTAU.58	WBGene00011676	Q27518
Contig118-snapTAU.1	WBGene00011923	G5ECE8
Contig119-snapTAU.60	WBGene00001050	Q10660
Contig12-snap.49	WBGene00001535	Q9GYQ4
Contig12-snapTAU.108	WBGene00001805	Q9XU57
Contig12-snapTAU.140	WBGene00004005	Q19015
Contig12-snapTAU.206	WBGene00010716	Q21389
Contig12-snapTAU.208	WBGene00007455	Q9U3Q6
Contig12-snapTAU.260	WBGene00011798	Q9XUP7
Contig12-snapTAU.267	WBGene00002187	O44408
Contig12-snapTAU.388	WBGene00003542	Q7Z0M7
Contig12-snapTAU.420	WBGene00001757	Q21743
Contig12-snapTAU.421	WBGene00021491	Q965W4
Contig12-snapTAU.457	WBGene00016095	Q18152
Contig12-snapTAU.467	WBGene00009554	O45496
Contig12-snapTAU.506	WBGene00001547	Q9XTY1
Contig12-snapTAU.546	WBGene00012137	Q22851
Contig12-snapTAU.96	WBGene00007112	Q17437
Contig12-snapTAU.97	WBGene00007112	Q17437
Contig120-snapTAU.15	WBGene00012190	Q9XUB4
Contig125-snapTAU.60	WBGene00010254	Q20981
Contig126-snapTAU.24	WBGene00015497	Q65CM0
Contig129-snapTAU.11	WBGene00008248	Q18766
Contig13-snapTAU.388	WBGene00022102	Q9N4Q0
Contig13-snapTAU.412	WBGene00017300	Q27492
Contig131-snapTAU.18	WBGene00003970	Q19192
Contig131-snapTAU.23	WBGene00011354	Q22079
Contig131-snapTAU.60	WBGene00012586	Q9NAK3
Contig137-snapTAU.17	WBGene00012834	Q9XWN7
Contig14-snapTAU.287	WBGene00008409	O17730
Contig14-snapTAU.327	WBGene00010734	Q21412
Contig14-snapTAU.330	WBGene00004400	Q19821
Contig14-snapTAU.419	WBGene00007559	Q17955
Contig14-snapTAU.466	WBGene00013463	Q95PZ1
Contig14-snapTAU.488	WBGene00012707	Q9U2L6
Contig141-snapTAU.23	WBGene00013689	Q9NF14
Contig141-snapTAU.32	WBGene00004178	P90786
Contig142-snap.16	WBGene00003858	O18158
Contig142-snapTAU.28	WBGene00000998	Q09165
Contig142-snapTAU.31	WBGene00000998	Q09165
Contig142-snapTAU.32	WBGene00000998	Q09165
Contig143-snap.6	WBGene00003615	Q27521
Contig144-snapTAU.18	WBGene00004437	Q17606
Contig146-snap.29	WBGene00006622	O45421
Contig15-snapTAU.113	WBGene00004951	Q21408
Contig15-snapTAU.114	WBGene00004951	Q21408
Contig15-snapTAU.246	WBGene00006436	G4SLH0
Contig15-snapTAU.248	WBGene00021578	Q9N4X3
Contig15-snapTAU.259	WBGene00003883	Q22830
Contig15-snapTAU.261	WBGene00003883	Q22830
Contig15-snapTAU.321	WBGene00001006	G5ECY0
Contig1590-snapTAU.1	WBGene00000503	Q11174
Contig16-snapTAU.184	WBGene00006616	Q9GRV5
Contig16-snapTAU.188	WBGene00006616	Q9GRV5
Contig16-snapTAU.216	WBGene00022631	O01775
Contig16-snapTAU.34	WBGene00018348	Q20326
Contig16-snapTAU.36	WBGene00009945	Q20681
Contig16-snapTAU.91	WBGene00009945	Q20681
Contig168-snapTAU.2	WBGene00006805	O61528
Contig17-snapTAU.226	WBGene00000483	Q0PCD8
Contig173-snapTAU.14	WBGene00000402	Q5F4U0
Contig18-snap.159	WBGene00009436	Q20062
Contig18-snapTAU.45	WBGene00004809	G5EE67
Contig18-snapTAU.46	WBGene00009186	Q19839
Contig19-snapTAU.1	WBGene00015412	O44452
Contig19-snapTAU.205	WBGene00020804	Q10015
Contig19-snapTAU.26	WBGene00000212	Q23498
Contig19-snapTAU.287	WBGene00001490	O17905
Contig1934-snapTAU.1	WBGene00022722	Q02335
Contig197-snapTAU.4	WBGene00008514	P34384
Contig197-snapTAU.5	WBGene00303021	P34385
Contig199-snapTAU.1	WBGene00011502	P34561
Contig2-snapTAU.109	WBGene00022845	O76444
Contig2-snapTAU.201	WBGene00022654	Q965Z8
Contig2-snapTAU.203	WBGene00020520	O17031
Contig2-snapTAU.382	WBGene00022703	P34631
Contig2-snapTAU.518	WBGene00006178	Q9GS11
Contig2-snapTAU.98	WBGene00008344	Q18877
Contig20-snapTAU.112	WBGene00005892	O45695
Contig20-snapTAU.209	WBGene00012854	F3Y5Q0
Contig200-snapTAU.2	WBGene00000503	Q11174
Contig200-snapTAU.4	WBGene00012137	Q22851
Contig21-snapTAU.106	WBGene00009945	Q20681
Contig21-snapTAU.107	WBGene00021844	Q9N3D0
Contig21-snapTAU.284	WBGene00000744	Q86NE2
Contig21-snapTAU.319	WBGene00012169	Q23103
Contig21-snapTAU.320	WBGene00022454	Q9N586
Contig217-snapTAU.1	WBGene00011676	Q27518
Contig22-snapTAU.159	WBGene00002005	P09446
Contig22-snapTAU.16	WBGene00013766	Q9U2X0
Contig22-snapTAU.248	WBGene00000140	Q9N4M4
Contig22-snapTAU.253	WBGene00000140	Q9N4M4
Contig23-snap.63	WBGene00044697	Q2V071
Contig23-snapTAU.10	WBGene00000722	Q17417
Contig23-snapTAU.204	WBGene00015057	Q960A1
Contig23-snapTAU.221	WBGene00005088	Q9NAH9
Contig23-snapTAU.248	WBGene00021479	A0A164D3K0
Contig23-snapTAU.276	WBGene00003798	P91495
Contig23-snapTAU.277	WBGene00012015	Q17761
Contig23-snapTAU.292	WBGene00006179	O16336
Contig23-snapTAU.323	WBGene00016051	O76434
Contig232-snapTAU.1	WBGene00013766	Q9U2X0
Contig24-snap.65	WBGene00002005	P09446
Contig24-snapTAU.151	WBGene00012995	H1UBJ9
Contig24-snapTAU.241	WBGene00003963	Q17770
Contig24-snapTAU.242	WBGene00017429	Q19391
Contig24-snapTAU.265	WBGene00011967	Q22707
Contig24-snapTAU.281	WBGene00011000	Q9XVV9
Contig26-snap.189	WBGene00000985	Q9XVS9
Contig26-snap.68	WBGene00017758	O01914
Contig26-snapTAU.120	WBGene00000886	P52017
Contig26-snapTAU.158	WBGene00000783	P43507
Contig26-snapTAU.159	WBGene00010811	Q21455
Contig26-snapTAU.209	WBGene00016960	Q18891
Contig26-snapTAU.210	WBGene00016960	Q18891
Contig26-snapTAU.88	WBGene00007444	Q17828
Contig27-snapTAU.206	WBGene00010989	Q09594
Contig28-snap.129_truncated_curated	WBGene00020460	Q95QB3
Contig28-snapTAU.160	WBGene00020460	Q95QB3
Contig28-snapTAU.267	WBGene00001239	G5EEE5
Contig28-snapTAU.269	WBGene00022200	Q9TZL9
Contig28-snapTAU.271	WBGene00022200	Q9TZL9
Contig28-snapTAU.295	WBGene00007304	Q17629
Contig28-snapTAU.57	WBGene00022641	B1GRL2
Contig28-snapTAU.58	WBGene00008996	O17824
Contig29-snapTAU.6	WBGene00010135	P90889
Contig3-snapTAU.188	WBGene00016601	P91156
Contig3-snapTAU.38	WBGene00006730	O45495
Contig3-snapTAU.39	WBGene00004767	Q93794
Contig3-snapTAU.403	WBGene00009341	P91867
Contig3-snapTAU.518	WBGene00003062	O44991
Contig3-snapTAU.98	WBGene00007974	Q93341
Contig30-snapTAU.102	WBGene00009988	D5MCS6
Contig30-snapTAU.210	WBGene00003095	Q20968
Contig31-snapTAU.192	WBGene00004461	Q19324
Contig31-snapTAU.248	WBGene00004790	Q19185
Contig31-snapTAU.249	WBGene00007189	Q17515
Contig31-snapTAU.250	WBGene00007194	Q17514
Contig31-snapTAU.330	WBGene00020613	P91468
Contig33-snapTAU.1	WBGene00021074	Q9TYV3
Contig33-snapTAU.189	WBGene00004005	Q19015
Contig33-snapTAU.36	WBGene00016806	O44798
Contig34-snap.12	WBGene00022178	Q9BL43
Contig35-snap.117	WBGene00020052	Q95Y87
Contig35-snap.98	WBGene00004506	Q9XTT9
Contig35-snapTAU.234	WBGene00020563	Q10011
Contig35-snapTAU.242	WBGene00007455	Q9U3Q6
Contig35-snapTAU.30	WBGene00013874	H9G2Y9
Contig35-snapTAU.328	WBGene00012806	G5EBG2
Contig35-snapTAU.64	WBGene00009119	Q93576
Contig36-snapTAU.125	WBGene00044924	Q0G841
Contig36-snapTAU.150	WBGene00000090	Q94125
Contig36-snapTAU.177	WBGene00007354	P48458
Contig36-snapTAU.88	WBGene00006882	G5EDN8
Contig36-snapTAU.90	WBGene00006882	G5EDN8
Contig37-snapTAU.187	WBGene00016558	Q18559
Contig37-snapTAU.188	WBGene00020307	O16723
Contig37-snapTAU.206	WBGene00004049	Q9N4H4
Contig37-snapTAU.234	WBGene00010847	Q21504
Contig39-snapTAU.178	WBGene00012013	Q22770
Contig40-snapTAU.183	WBGene00004488	O18650
Contig40-snapTAU.204	WBGene00019999	NA
Contig41-snap.70	WBGene00002363	G5EGK8
Contig41-snapTAU.130	WBGene00001051	Q17868
Contig41-snapTAU.214	WBGene00003607	Q9XYB7
Contig41-snapTAU.31	WBGene00018758	P91321
Contig41-snapTAU.80	WBGene00007493	Q17872
Contig42-snap.101	WBGene00012494	O62412
Contig42-snapTAU.124	WBGene00019537	Q966I7
Contig42-snapTAU.125	WBGene00010609	G5EET2
Contig42-snapTAU.148	WBGene00017054	Q18973
Contig42-snapTAU.149	WBGene00017054	Q18973
Contig42-snapTAU.165	WBGene00011676	Q27518
Contig42-snapTAU.169	WBGene00009917	B3WFV1
Contig42-snapTAU.2	WBGene00003963	Q17770
Contig42-snapTAU.246	WBGene00001239	G5EEE5
Contig42-snapTAU.57	WBGene00001239	G5EEE5
Contig42-snapTAU.61	WBGene00022770	Q23534
Contig42-snapTAU.77	WBGene00007455	Q9U3Q6
Contig43-snapTAU.101	WBGene00006183	O01536
Contig43-snapTAU.175	WBGene00016051	O76434
Contig43-snapTAU.176	WBGene00021947	Q5KQP7
Contig43-snapTAU.99	WBGene00015047	Q17449
Contig44-snapTAU.199	WBGene00015565	P91020
Contig44-snapTAU.86	WBGene00020287	A3QMD7
Contig45-snapTAU.114	WBGene00019101	Q8IA57
Contig45-snapTAU.2	WBGene00000214	G5EEI4
Contig45-snapTAU.233	WBGene00019489	Q09407
Contig45-snapTAU.234	WBGene00007963	Q27477
Contig45-snapTAU.35	WBGene00018206	O16276
Contig45-snapTAU.42	WBGene00008669	Q19339
Contig45-snapTAU.44	WBGene00009186	Q19839
Contig45-snapTAU.49	WBGene00011642	Q7JMM5
Contig46-snapTAU.10	WBGene00014037	P30652
Contig47-snapTAU.145	WBGene00015466	Q95X94
Contig47-snapTAU.158	WBGene00012190	Q9XUB4
Contig47-snapTAU.201	WBGene00021515	Q95Y12
Contig47-snapTAU.83	WBGene00018295	O16467
Contig48-snapTAU.114	WBGene00012137	Q22851
Contig48-snapTAU.169	WBGene00016588	A3QMB9
Contig48-snapTAU.5	WBGene00009542	Q20168
Contig495-snapTAU.3	WBGene00004488	O18650
Contig5-snapTAU.142	WBGene00017347	Q19302
Contig5-snapTAU.276	WBGene00004023	Q22525
Contig5-snapTAU.41	WBGene00017190	Q965Y9
Contig5-snapTAU.42	WBGene00017190	Q965Y9
Contig5-snapTAU.421	WBGene00004488	O18650
Contig5-snapTAU.44	WBGene00017190	Q965Y9
Contig5-snapTAU.45	WBGene00017190	Q965Y9
Contig5-snapTAU.85	WBGene00021931	Q9N360
Contig50-snapTAU.153	WBGene00020302	Q22303
Contig50-snapTAU.70	WBGene00000750	Q21039
Contig51-snapTAU.17	WBGene00005083	Q22594
Contig52-snap.119	WBGene00013642	Q9U320
Contig52-snap.120	WBGene00008736	Q19399
Contig52-snapTAU.117	WBGene00001239	G5EEE5
Contig52-snapTAU.118	WBGene00022200	Q9TZL9
Contig52-snapTAU.156	WBGene00008736	Q19399
Contig52-snapTAU.179	WBGene00019516	Q9TYY4
Contig52-snapTAU.18	WBGene00012137	Q22851
Contig52-snapTAU.28	WBGene00014137	Q9XUA7
Contig52-snapTAU.37	WBGene00017723	A0A0K3AUU0
Contig53-snapTAU.107	WBGene00021160	Q9UB00
Contig54-snap.33	WBGene00001153	Q09603
Contig54-snapTAU.130	WBGene00008093	Q93377
Contig54-snapTAU.133	WBGene00002282	Q93373
Contig54-snapTAU.45	WBGene00020707	Q9TXN7
Contig55-snapTAU.61	WBGene00013569	Q9XWB9
Contig56-snapTAU.123	WBGene00020471	O17373
Contig56-snapTAU.166	WBGene00013211	Q8I4C6
Contig57-snap.100	WBGene00004315	Q9XU67
Contig58-snapTAU.108	WBGene00017478	A0A1C3NSL8
Contig58-snapTAU.109	WBGene00006178	Q9GS11
Contig58-snapTAU.63	WBGene00017478	A0A1C3NSL8
Contig58-snapTAU.64	WBGene00013540	Q9XW75
Contig58-snapTAU.91	WBGene00004440	Q19869
Contig59-snap.145	WBGene00013464	Q95PY9
Contig6-snapTAU.312	WBGene00004474	P49041
Contig6-snapTAU.412	WBGene00019217	Q9N5L9
Contig60-snapTAU.64	WBGene00001805	Q9XU57
Contig60-snapTAU.81	WBGene00011114	Q21823
Contig60-snapTAU.82	WBGene00021765	Q8WTK1
Contig60-snapTAU.91	WBGene00006083	O18069
Contig600-snap.2	WBGene00004488	O18650
Contig61-snap.66	WBGene00010556	Q21215
Contig61-snapTAU.23	WBGene00017947	Q19930
Contig63-snapTAU.117	WBGene00016725	Q18662
Contig63-snapTAU.92	WBGene00008978	Q93532
Contig63-snapTAU.93	WBGene00011894	Q22643
Contig64-snapTAU.83	WBGene00003834	B5BM32
Contig65-snapTAU.1	WBGene00021074	Q9TYV3
Contig65-snapTAU.14	WBGene00003963	Q17770
Contig67-snapTAU.14	WBGene00017183	O16575
Contig67-snapTAU.15	WBGene00000776	O45734
Contig67-snapTAU.62	WBGene00016147	Q27472
Contig67-snapTAU.70	WBGene00007913	P90771
Contig67-snapTAU.71	WBGene00016975	Q18895
Contig67-snapTAU.72	WBGene00016975	Q18895
Contig7-snapTAU.149	WBGene00010254	Q20981
Contig7-snapTAU.453	WBGene00000883	P52015
Contig7-snapTAU.55	WBGene00007455	Q9U3Q6
Contig7-snapTAU.59	WBGene00007455	Q9U3Q6
Contig7-snapTAU.60	WBGene00007455	Q9U3Q6
Contig7-snapTAU.68	WBGene00007455	Q9U3Q6
Contig7-snapTAU.69	WBGene00007455	Q9U3Q6
Contig7-snapTAU.70	WBGene00019516	Q9TYY4
Contig70-snapTAU.31	WBGene00004947	A0A486WXD9
Contig71-snapTAU.8	WBGene00003497	Q21281
Contig73-snapTAU.27	WBGene00003598	Q19818
Contig74-snapTAU.96	WBGene00007545	A0A486WXC8
Contig75-snapTAU.103	WBGene00011040	Q21765
Contig75-snapTAU.150	WBGene00013219	Q9XVZ8
Contig75-snapTAU.159	WBGene00007686	Q18090
Contig75-snapTAU.45	WBGene00020235	H2L0J8
Contig76-snapTAU.82	WBGene00043049	G5EES4
Contig77-snapTAU.97	WBGene00021999	Q9N326
Contig77-snapTAU.98	WBGene00009215	Q19876
Contig78-snapTAU.116	WBGene00016585	A3QMB6
Contig78-snapTAU.117	WBGene00008475	O17749
Contig79-snapTAU.25	WBGene00005893	Q21685
Contig79-snapTAU.28	WBGene00007643	Q93227
Contig79-snapTAU.69	WBGene00012308	G5EEY0
Contig79-snapTAU.70	WBGene00007829	G5EBI1
Contig8-snapTAU.191	WBGene00015356	Q11102
Contig8-snapTAU.222	WBGene00018985	Q20892
Contig8-snapTAU.357	WBGene00012443	Q9U2R3
Contig8-snapTAU.423	WBGene00017322	P34393
Contig8-snapTAU.424	WBGene00020938	Q4W528
Contig8-snapTAU.426	WBGene00009394	O45444
Contig80-snapTAU.30	WBGene00000373	Q27531
Contig80-snapTAU.6	WBGene00011657	O02308
Contig80-snapTAU.70	WBGene00016147	Q27472
Contig81-snapTAU.111	WBGene00013266	Q9NA74
Contig81-snapTAU.112	WBGene00017194	Q19148
Contig81-snapTAU.74	WBGene00001667	Q20701
Contig83-snapTAU.117	WBGene00020550	Q22537
Contig84-snapTAU.60	WBGene00016157	O01964
Contig85-snapTAU.53	WBGene00015167	Q11077
Contig85-snapTAU.54	WBGene00015167	Q11077
Contig86-snapTAU.15	WBGene00044379	Q4W516
Contig86-snapTAU.4	WBGene00004807	G5ECU1
Contig86-snapTAU.54	WBGene00002601	P91278
Contig87-snapTAU.100	WBGene00011360	Q22084
Contig87-snapTAU.99	WBGene00000681	Q86S35
Contig9-snapTAU.143	WBGene00000638	Q93207
Contig9-snapTAU.184	WBGene00003001	P14585
Contig9-snapTAU.38	WBGene00018359	O44507
Contig903-snapTAU.2	WBGene00001668	Q93743
Contig91-snapTAU.16	WBGene00011156	O45713
Contig91-snapTAU.33	WBGene00006180	O16332
Contig91-snapTAU.85	WBGene00003699	H2L0L6
Contig91-snapTAU.88	WBGene00011396	Q9XU11
Contig91-snapTAU.89	WBGene00003724	O16361
Contig91-snapTAU.90	WBGene00010706	Q27505
Contig93-snapTAU.30	WBGene00004057	O44514
Contig96-snapTAU.38	WBGene00022848	O76449
Contig96-snapTAU.53	WBGene00015214	Q17519
Contig96-snapTAU.9	WBGene00020827	Q22805
Contig97-snapTAU.136	WBGene00012459	Q9XXJ1
Contig97-snapTAU.21	WBGene00020897	Q10025
Iso_D.1.1	WBGene00044737	Q2EEM8
Iso_D.10001.1	WBGene00010904	Q21603
Iso_D.10021.3	WBGene00007455	Q9U3Q6
Iso_D.1006.1	WBGene00004364	A5PEW5
Iso_D.10064.1_curated	WBGene00003682	Q95Y07
Iso_D.10113.1	WBGene00011674	Q27516
Iso_D.10123.1	WBGene00013328	Q7YTI8
Iso_D.10131.1	WBGene00013540	Q9XW75
Iso_D.10132.1	WBGene00016975	Q18895
Iso_D.10133.1	WBGene00007650	Q93242
Iso_D.10149.3	WBGene00012222	Q23149
Iso_D.10150.1	WBGene00016095	Q18152
Iso_D.10155.1	WBGene00012137	Q22851
Iso_D.10156.1	WBGene00018906	Q20852
Iso_D.10200.2	WBGene00015258	P91003
Iso_D.10201.1	WBGene00003548	Q9N2V2
Iso_D.10357.1	WBGene00017928	O76365
Iso_D.10390.2	WBGene00012970	Q9XXC8
Iso_D.10425.1	WBGene00012885	O45948
Iso_D.10455.5	WBGene00009226	O17851
Iso_D.10501.2	WBGene00006852	G5EBY8
Iso_D.10506.1	WBGene00000503	Q11174
Iso_D.10508.6	WBGene00013739	A0A3B1DV80
Iso_D.10518.1	WBGene00000594	G5EDG6
Iso_D.10526.1	WBGene00004005	Q19015
Iso_D.106.2	WBGene00019748	Q21480
Iso_D.10645.2	WBGene00010794	O17953
Iso_D.10706.1	WBGene00004480	Q20206
Iso_D.10711.1	WBGene00020284	G5ED26
Iso_D.10782.1	WBGene00007965	Q18493
Iso_D.10815.2	WBGene00021922	Q9N369
Iso_D.10821.1	WBGene00006970	G5EBU4
Iso_D.10828.1	WBGene00020728	O45205
Iso_D.10899.2	WBGene00017644	Q19641
Iso_D.10916.2	WBGene00007802	Q18298
Iso_D.1095.1	WBGene00012776	Q9U2H2
Iso_D.10968.1	WBGene00008074	Q9XUG9
Iso_D.11061.1	WBGene00021420	Q95XS1
Iso_D.1110.1	WBGene00003812	Q93796
Iso_D.11132.1	WBGene00004906	G5EE39
Iso_D.11220.1	WBGene00045177	A0PCJ1
Iso_D.1126.1	WBGene00020389	O76407
Iso_D.11333.2	WBGene00022848	O76449
Iso_D.11420.1	WBGene00013935	O45998
Iso_D.11474.2	WBGene00003909	G5EDE1
Iso_D.11569.1	WBGene00009323	O45435
Iso_D.11654.1	WBGene00019715	O76686
Iso_D.11760.1	WBGene00004446	Q22716
Iso_D.12027.2	WBGene00000158	Q8WQB3
Iso_D.12072.3	WBGene00008891	Q9XV91
Iso_D.12073.2	WBGene00008891	Q9XV91
Iso_D.12093.3	WBGene00001840	Q18212
Iso_D.12105.1	WBGene00019917	O16778
Iso_D.12119.1	WBGene00007153	P90732
Iso_D.12122.1	WBGene00019917	O16778
Iso_D.12197.1	WBGene00008598	Q19235
Iso_D.12200.3	WBGene00013739	A0A3B1DV80
Iso_D.12231.1	WBGene00001405	Q9XVE5
Iso_D.12279.2	WBGene00002193	G5EC46
Iso_D.12281.1	WBGene00020937	Q8MQG6
Iso_D.12577.1	WBGene00012583	Q9NAK5
Iso_D.12702.1	WBGene00003514	P12845
Iso_D.12794.2	WBGene00016159	O01966
Iso_D.12809.1	WBGene00004490	P49197
Iso_D.12889.3	WBGene00009142	Q93592
Iso_D.12981.1	WBGene00017737	Q9TXI1
Iso_D.13000.2	WBGene00022710	P91569
Iso_D.13004.1	WBGene00012031	P90795
Iso_D.13070.2	WBGene00013599	Q9U1Q0
Iso_D.13078.1	WBGene00011944	O02327
Iso_D.13091.4	WBGene00021346	Q9BKU9
Iso_D.13188.3	WBGene00010582	Q9XUU8
Iso_D.13269.1	WBGene00016567	Q95QZ5
Iso_D.13278.1	WBGene00015691	P91041
Iso_D.13304.2	WBGene00001067	P91285
Iso_D.13318.1	WBGene00020932	O01815
Iso_D.13320.1	WBGene00000254	P51559
Iso_D.13404.1	WBGene00012802	G5EEU2
Iso_D.1341.2	WBGene00014045	Q23563
Iso_D.13421.1	WBGene00008767	Q19422
Iso_D.13427.2	WBGene00044438	Q4W5H0
Iso_D.13439.1	WBGene00011156	O45713
Iso_D.13448.1	WBGene00009646	G5EBJ0
Iso_D.13530.1	WBGene00007448	Q17825
Iso_D.13538.1	WBGene00008707	Q9U3J8
Iso_D.13540.1	WBGene00008707	Q9U3J8
Iso_D.13571.1	WBGene00012137	Q22851
Iso_D.13590.2	WBGene00019698	O44959
Iso_D.13604.2	WBGene00006525	G5EEE2
Iso_D.13671.1	WBGene00007913	P90771
Iso_D.13672.1	WBGene00007913	P90771
Iso_D.13694.1	WBGene00000050	P91197
Iso_D.13720.1	WBGene00003659	P91829
Iso_D.13779.3	WBGene00006793	Q9U334
Iso_D.13781.1	WBGene00008398	Q93408
Iso_D.13847.2	WBGene00003951	Q9XUV0
Iso_D.13935.1	WBGene00009187	Q93615
Iso_D.13976.1	WBGene00022119	Q9N4H7
Iso_D.14012.4	WBGene00018909	P91351
Iso_D.14021.1	WBGene00022590	Q23079
Iso_D.14050.1	WBGene00020707	Q9TXN7
Iso_D.14127.1	WBGene00002717	J7SA49
Iso_D.14131.1	WBGene00010565	Q21225
Iso_D.14135.12	WBGene00010789	O17951
Iso_D.14276.1	WBGene00003601	Q10902
Iso_D.14327.2	WBGene00022517	O45021
Iso_D.14374.1	WBGene00019917	O16778
Iso_D.14389.2	WBGene00009127	O17838
Iso_D.14422.2	WBGene00009945	Q20681
Iso_D.14425.1	WBGene00009945	Q20681
Iso_D.14461.1	WBGene00016261	Q95YE1
Iso_D.14480.1	WBGene00000599	Q17460
Iso_D.1449.1	WBGene00016865	A0A4V0IK77
Iso_D.14533.1	WBGene00020006	Q9TYX6
Iso_D.1457.1	WBGene00015310	P90740
Iso_D.14585.1	WBGene00009727	Q20437
Iso_D.14609.3	WBGene00018986	Q20893
Iso_D.14677.2	WBGene00006610	G5EDP3
Iso_D.14680.1	WBGene00010224	Q93806
Iso_D.14758.1	WBGene00016274	Q09486
Iso_D.14978.2	WBGene00017448	Q19446
Iso_D.14998.1	WBGene00003965	Q9Y1J3
Iso_D.15092.1	WBGene00001551	Q86C56
Iso_D.15218.2	WBGene00012259	G5EC30
Iso_D.15350.1	WBGene00009762	Q9XV21
Iso_D.15652.1	WBGene00013976	G5ED47
Iso_D.1571.4	WBGene00001945	Q10453
Iso_D.1590.1	WBGene00015284	Q17542
Iso_D.1763.1	WBGene00000681	Q86S35
Iso_D.178.1	WBGene00000219	O01530
Iso_D.179.2	WBGene00000215	Q86NE0
Iso_D.1861.1	WBGene00003909	G5EDE1
Iso_D.1919.1	WBGene00004361	O01705
Iso_D.194.2	WBGene00001595	Q17339
Iso_D.2014.1	WBGene00012776	Q9U2H2
Iso_D.2042.5	WBGene00019275	Q9UAY9
Iso_D.2066.1	WBGene00235102	L8E6I4
Iso_D.223.8	WBGene00015284	Q17542
Iso_D.224.1	WBGene00015284	Q17542
Iso_D.2294.2	WBGene00018359	O44507
Iso_D.2416.1	WBGene00008583	Q19222
Iso_D.2499.1	WBGene00004442	Q21930
Iso_D.2531.1	WBGene00019477	Q21266
Iso_D.2634.2	WBGene00000594	G5EDG6
Iso_D.2636.1	WBGene00004874	Q20060
Iso_D.2657.1	WBGene00001555	O02298
Iso_D.2676.2	WBGene00017515	Q94187
Iso_D.2846.2	WBGene00000212	Q23498
Iso_D.2916.1	WBGene00018181	Q20157
Iso_D.2918.1	WBGene00011017	Q8WQD7
Iso_D.2974.1	WBGene00020471	O17373
Iso_D.3013.1	WBGene00001793	Q9U2D9
Iso_D.3074.1	WBGene00001698	O01465
Iso_D.3077.1	WBGene00012173	Q23105
Iso_D.3144.1	WBGene00044071	H2KYE9
Iso_D.3171.3	WBGene00018024	Q20007
Iso_D.3328.1	WBGene00013975	Q23499
Iso_D.3383.3	WBGene00016624	Q95QR5
Iso_D.3447.1	WBGene00000484	G5EGF0
Iso_D.3487.1	WBGene00003786	G5EF32
Iso_D.3514.1	WBGene00006178	Q9GS11
Iso_D.3657.2	WBGene00009289	G5EDS8
Iso_D.3754.1	WBGene00020788	Q22763
Iso_D.3802.1	WBGene00018984	P90893
Iso_D.3822.1	WBGene00012514	Q7YWR7
Iso_D.4043.1	WBGene00010274	Q21009
Iso_D.4063.1	WBGene00020661	O02063
Iso_D.4095.1	WBGene00007304	Q17629
Iso_D.4206.1	WBGene00019640	O16627
Iso_D.4332.1	WBGene00001510	Q09649
Iso_D.4334.3	WBGene00001510	Q09649
Iso_D.4384.4	WBGene00012639	O62425
Iso_D.4424.1	WBGene00017892	Q19853
Iso_D.4497.2	WBGene00004055	Q17446
Iso_D.4640.1	WBGene00016806	O44798
Iso_D.4766.1	WBGene00010052	Q20772
Iso_D.4789.1	WBGene00018295	O16467
Iso_D.4803.1	WBGene00006583	Q09665
Iso_D.4806.4	WBGene00018961	Q10129
Iso_D.4959.1	WBGene00000786	P43510
Iso_D.5005.1	WBGene00013014	G5EC81
Iso_D.5042.1	WBGene00003465	Q94053
Iso_D.5045.2	WBGene00001498	Q19713
Iso_D.51.1	WBGene00015055	Q17455
Iso_D.5137.1	WBGene00003774	G5EGQ9
Iso_D.5261.1	WBGene00019219	Q2WF63
Iso_D.5284.1	WBGene00001067	P91285
Iso_D.5359.1	WBGene00019692	P91393
Iso_D.5366.1	WBGene00013925	Q23450
Iso_D.545.1	WBGene00020368	Q22355
Iso_D.5476.7	WBGene00006994	G5EEM5
Iso_D.5498.1	WBGene00044641	A0A0K3AUQ6
Iso_D.5501.1	WBGene00010785	Q23670
Iso_D.552.2	WBGene00020368	Q22355
Iso_D.5784.1	WBGene00007455	Q9U3Q6
Iso_D.5838.1	WBGene00003465	Q94053
Iso_D.5920.2	WBGene00018045	Q20034
Iso_D.594.1	WBGene00021515	Q95Y12
Iso_D.6086.1	WBGene00019516	Q9TYY4
Iso_D.6098.1	WBGene00009391	O45438
Iso_D.6099.1	WBGene00008159	G5ECA6
Iso_D.6178.1	WBGene00000482	Q22516
Iso_D.6227.1	WBGene00013540	Q9XW75
Iso_D.624.2	WBGene00001153	Q09603
Iso_D.6308.1	WBGene00013655	Q9NAM5
Iso_D.6308.2	WBGene00011359	Q22085
Iso_D.6310.1	WBGene00003970	Q19192
Iso_D.6321.1	WBGene00005936	P34490
Iso_D.6422.1	WBGene00016657	Q18621
Iso_D.6438.1	WBGene00007488	Q09454
Iso_D.6554.1	WBGene00001067	P91285
Iso_D.6600.2	WBGene00000631	O44774
Iso_D.6620.6	WBGene00009208	B7WN93
Iso_D.6642.1	WBGene00011071	Q09417
Iso_D.684.1	WBGene00003001	P14585
Iso_D.6849.1	WBGene00020068	Q21986
Iso_D.6972.1	WBGene00013880	Q23295
Iso_D.7030.1	WBGene00009648	Q7K7S3
Iso_D.7055.1	WBGene00044379	Q4W516
Iso_D.7072.1	WBGene00010134	P90891
Iso_D.7080.1	WBGene00000618	Q22369
Iso_D.7109.1	WBGene00019185	O76671
Iso_D.7141.1	WBGene00020099	Q95QB7
Iso_D.7142.1	WBGene00043060	Q629J5
Iso_D.7198.1	WBGene00018347	V6CKP5
Iso_D.7199.1	WBGene00014254	Q09653
Iso_D.7200.1	WBGene00014254	Q09653
Iso_D.7219.1	WBGene00013039	Q9XTT3
Iso_D.7221.1	WBGene00000653	Q21562
Iso_D.7271.1	WBGene00016469	Q966P8
Iso_D.7272.3	WBGene00020841	P91498
Iso_D.7434.6	WBGene00018418	P34434
Iso_D.7436.1	WBGene00006727	P0CG71
Iso_D.7436.2	WBGene00006727	P0CG71
Iso_D.7491.1	WBGene00013739	A0A3B1DV80
Iso_D.7493.1	WBGene00021487	Q965W3
Iso_D.7536.4	WBGene00018895	P91345
Iso_D.7605.3	WBGene00011676	Q27518
Iso_D.7605.5	WBGene00001362	Q7YTQ6
Iso_D.7606.2	WBGene00008810	O17807
Iso_D.763.5	WBGene00019579	A3QMD2
Iso_D.764.1	WBGene00009607	O45506
Iso_D.7693.1	WBGene00018999	Q20933
Iso_D.7792.1	WBGene00012097	G5EFG4
Iso_D.7900.2	WBGene00017904	Q8MNT0
Iso_D.7929.1	WBGene00013730	D0Z5P0
Iso_D.8072.6	WBGene00007615	O17585
Iso_D.8087.1	WBGene00022696	Q20255
Iso_D.8191.2	WBGene00002169	P41877
Iso_D.8325.2	WBGene00004760	NA
Iso_D.8344.1	WBGene00004498	P90983
Iso_D.8400.1	WBGene00010170	O45587
Iso_D.8473.1	WBGene00006946	C0HKD6
Iso_D.8487.4	WBGene00016011	Q10121
Iso_D.8499.1	WBGene00006727	P0CG71
Iso_D.8533.5	WBGene00017510	O44635
Iso_D.8640.1	WBGene00016085	Q18142
Iso_D.8721.2	WBGene00016811	Q8ITY5
Iso_D.8732.1	WBGene00003598	Q19818
Iso_D.875.1	WBGene00044345	Q2WF61
Iso_D.8787.1	WBGene00000772	O01835
Iso_D.8791.1	WBGene00013569	Q9XWB9
Iso_D.8792.1	WBGene00020802	Q8IFY9
Iso_D.883.1	WBGene00007321	P34292
Iso_D.8860.1	WBGene00007699	Q9U3P4
Iso_D.8863.4	WBGene00007699	Q9U3P4
Iso_D.9009.1	WBGene00005532	Q17398
Iso_D.9039.1	WBGene00005542	Q95X80
Iso_D.9070.1	WBGene00001557	Q6DNF3
Iso_D.9099.1	WBGene00016975	Q18895
Iso_D.9125.1	WBGene00000967	A5JYX5
Iso_D.9180.1	WBGene00019617	Q94269
Iso_D.9184.1	WBGene00019617	Q94269
Iso_D.9193.1	WBGene00006685	O45894
Iso_D.921.1	WBGene00003916	Q9TW45
Iso_D.9235.1	WBGene00015694	P91037
Iso_D.9239.1	WBGene00010238	Q20974
Iso_D.9255.1	WBGene00001598	P34689
Iso_D.9263.1	WBGene00014046	Q23564
Iso_D.9297.1	WBGene00005079	Q19992
Iso_D.9332.1	WBGene00005477	Q9N5D1
Iso_D.9409.1_truncated_curated	WBGene00003676	Q965W2
Iso_D.9475.1	WBGene00013222	G5EGR5
Iso_D.9486.2	WBGene00013573	Q7YWP9
Iso_D.9496.1	WBGene00017577	P91263
Iso_D.9524.1	WBGene00011961	O18128
Iso_D.954.1	WBGene00011321	Q22060
Iso_D.9601.1	WBGene00012342	Q23223
Iso_D.9683.2	WBGene00022770	Q23534
Iso_D.9690.1	WBGene00016123	Q8IG45
Iso_D.9735.1	WBGene00012222	Q23149
Iso_D.9741.2	WBGene00009236	Q19890
Iso_D.9742.1	WBGene00009236	Q19890
Iso_D.9799.1	WBGene00006419	A0A0K3ASR6
Iso_D.9801.1	WBGene00008669	Q19339
Iso_D.9808.2	WBGene00000665	P34340
Iso_D.982.1	WBGene00008262	O17694
Iso_D.9829.2	WBGene00010403	G5EDX5
Iso_D.9845.1	WBGene00010706	Q27505
Iso_D.9857.1	WBGene00015333	P34272
Iso_D.987.1	WBGene00013352	G5EGH7
Iso_D.9898.1	WBGene00010705	Q27506
Iso_D.9899.1	WBGene00000373	Q27531
Iso_D.9967.1	WBGene00004006	Q19733
Iso_D.9973.1	WBGene00001805	Q9XU57
Iso_D.9974.1	WBGene00001806	Q23553
Iso_D.9987.1	WBGene00004005	Q19015
Iso_D.9998.1	WBGene00018206	O16276
isopolya.1164.1	WBGene00001629	Q8I136
isopolya.1309.1	WBGene00016644	Q18610
isopolya.1471.1	WBGene00002007	P27420
isopolya.1742.2	WBGene00001834	O17695
isopolya.1907.1	WBGene00017427	Q19390
isopolya.2050.1	WBGene00000744	Q86NE2
isopolya.2239.2	WBGene00018880	G5EDN0
isopolya.2284.1	WBGene00003882	Q21037
isopolya.2302.3	WBGene00002183	Q22100
isopolya.2546.1	WBGene00019218	Q9N5M0
isopolya.2649.2	WBGene00003111	Q95XP4
isopolya.2830.1	WBGene00004398	P18831
isopolya.2872.1	WBGene00018718	O17397
isopolya.2965.2	WBGene00020235	H2L0J8
isopolya.3147.1	WBGene00004704	O01159
isopolya.3417.1	WBGene00000883	P52015
isopolya.3423.1	WBGene00000883	P52015
isopolya.3652.1	WBGene00017162	Q95QN2
isopolya.3900.1	WBGene00021441	Q9N416
isopolya.3908.2	WBGene00021444	H2KYB6
isopolya.417.1	WBGene00012245	H2L2D0
isopolya.4190.3	WBGene00015353	P61228
isopolya.4291.3	WBGene00003858	O18158
isopolya.4326.3	WBGene00015335	P34275
isopolya.4400.1	WBGene00086546	P34370
isopolya.4497.1	WBGene00009952	O45552
isopolya.4974.1	WBGene00007188	Q9BIB3
isopolya.5108.1	WBGene00018932	O45110
isopolya.5328.2	WBGene00001753	Q09596
isopolya.5496.1	WBGene00007358	Q9XU43
isopolya.5550.1	WBGene00009926	Q9XUE5
isopolya.5799.1	WBGene00001411	P17221
isopolya.5852.5	WBGene00003010	Q17410
isopolya.5873.2	WBGene00006705	Q9N2W9
isopolya.6057.1	WBGene00009436	Q20062
isopolya.612.2	WBGene00013344	Q9GRZ1
isopolya.613.2	WBGene00008921	Q19520
isopolya.6334.1	WBGene00019664	P91373
isopolya.6592.1	WBGene00011225	Q19378
isopolya.6702.1	WBGene00045483	A7DT45
isopolya.6962.2	WBGene00017010	A0A2K5ATL9
isopolya.6986.1	WBGene00021845	Q9N3C9
isopolya.7027.2	WBGene00017749	Q95X83
isopolya.7033.1	WBGene00019006	O44735
isopolya.7111.1	WBGene00022042	Q86S66
isopolya.730.2	WBGene00008224	Q18724
isopolya.7386.1	WBGene00012386	G5EFH7
isopolya.7427.1	WBGene00009672	G5ECH1
isopolya.7547.1	WBGene00007707	Q9XVS0
isopolya.7585.2	WBGene00012366	O18188
isopolya.7593.1	WBGene00002193	G5EC46
isopolya.7851.1	WBGene00002027	Q7JKP6
isopolya.8083.2	WBGene00022201	Q95X21
isopolya.8493.1	WBGene00007130	P41942
isopolya.912.1	WBGene00004767	Q93794
isototal.1253.3	WBGene00017643	Q19642
isototal.1381.3	WBGene00018612	Q09568
isototal.1523.1	WBGene00000409	P90866
isototal.1633.1	WBGene00001840	Q18212
isototal.1973.3	WBGene00019893	Q21746
isototal.1973.4	WBGene00005020	Q9N491
isototal.2127.1	WBGene00003177	Q22071
isototal.2129.1	WBGene00006051	Q23057
isototal.2131.1	WBGene00007624	Q09249
isototal.2285.1	WBGene00000653	Q21562
isototal.2303.1	WBGene00013924	Q23451
isototal.2325.1	WBGene00001227	P30642
isototal.2369.1	WBGene00019895	Q21750
isototal.2590.3	WBGene00014054	Q23571
isototal.2808.1	WBGene00017683	Q09309
isototal.3098.1	WBGene00012834	Q9XWN7
isototal.3141.1	WBGene00011281	Q22031
isototal.3348.1	WBGene00018408	P34426
isototal.3464.2	WBGene00022493	Q95Y71
isototal.3483.2	WBGene00021828	Q9N3F2
isototal.3535.1	WBGene00012554	Q9XWV6
isototal.3561.1	WBGene00018154	Q20128
isototal.3632.2	WBGene00021660	Q9N3Q9
isototal.3890.1	WBGene00018989	Q9TZ63
isototal.422.1	WBGene00017914	O16206
isototal.4691.1	WBGene00003178	O45100
isototal.4742.1	WBGene00019163	Q8WTJ4
isototal.476.1	WBGene00009966	Q20716
isototal.5767.1	WBGene00000937	Q966M6
isototal.5785.1	WBGene00013131	D4YWC2
isototal.5793.1	WBGene00018009	Q95X59
isototal.5807.2	WBGene00019867	Q21697
isototal.6352.1	WBGene00001030	O45502
isototal.6776.1	WBGene00021268	Q9N563
isototal.6787.1	WBGene00043066	Q65XS8
isototal.6788.1	WBGene00007592	G5EDI1
isototal.703.1	WBGene00001423	Q22053
isototal.946.1	WBGene00175030	B7WNB4
isototal.956.1	WBGene00013669	Q8WQB4
mev-1	WBGene00003225	P41956
ppa_odr-7	WBGene00003854	P41933
ppa_stranded_DN10008_c0_g2_i1	WBGene00012763	O62433
ppa_stranded_DN10033_c0_g1_i1	WBGene00004417	P47991
ppa_stranded_DN10041_c0_g1_i1	WBGene00017435	Q19433
ppa_stranded_DN10043_c0_g1_i1	WBGene00007333	G5EES6
ppa_stranded_DN10051_c0_g1_i1	WBGene00001234	O62106
ppa_stranded_DN10065_c0_g2_i1	WBGene00000678	O44174
ppa_stranded_DN10068_c0_g1_i1	WBGene00016975	Q18895
ppa_stranded_DN10096_c0_g1_i1	WBGene00003613	O02151
ppa_stranded_DN10099_c0_g2_i1	WBGene00004184	G5EG43
ppa_stranded_DN10100_c0_g2_i1	WBGene00013272	Q7YWQ1
ppa_stranded_DN10119_c0_g1_i1	WBGene00012550	Q9XWW1
ppa_stranded_DN10146_c0_g1_i1	WBGene00016616	Q18587
ppa_stranded_DN10147_c0_g1_i1	WBGene00020046	Q7YXH3
ppa_stranded_DN10152_c0_g1_i1	WBGene00022641	B1GRL2
ppa_stranded_DN10198_c0_g1_i1	WBGene00021270	O76616
ppa_stranded_DN10218_c0_g1_i1	WBGene00015809	Q18037
ppa_stranded_DN10273_c0_g1_i1	WBGene00000941	Q9N408
ppa_stranded_DN10274_c0_g2_i1	WBGene00018468	W6RTA4
ppa_stranded_DN10279_c0_g1_i1	WBGene00012998	Q9U287
ppa_stranded_DN10293_c0_g1_i1	WBGene00019838	Q95QC2
ppa_stranded_DN10298_c0_g1_i1	WBGene00017734	Q9TXI4
ppa_stranded_DN10367_c0_g2_i1	WBGene00016052	O76438
ppa_stranded_DN10386_c0_g1_i1	WBGene00009395	O45442
ppa_stranded_DN1039_c0_g1_i1	WBGene00022256	Q8MXQ8
ppa_stranded_DN10410_c0_g1_i1	WBGene00009122	Q93573
ppa_stranded_DN10461_c0_g1_i1	WBGene00009514	O17861
ppa_stranded_DN10470_c0_g1_i1	WBGene00021128	O45011
ppa_stranded_DN10496_c0_g1_i1	WBGene00017033	P84199
ppa_stranded_DN10524_c0_g1_i1	WBGene00010466	G5EF90
ppa_stranded_DN10542_c0_g1_i1	WBGene00004282	Q9XWZ3
ppa_stranded_DN10548_c0_g1_i1	WBGene00015555	Q17750
ppa_stranded_DN10664_c0_g1_i1	WBGene00012887	O62477
ppa_stranded_DN10666_c0_g2_i1	WBGene00019007	Q8MXI1
ppa_stranded_DN10695_c0_g1_i1	WBGene00015940	Q09957
ppa_stranded_DN1074_c0_g2_i1	WBGene00016147	Q27472
ppa_stranded_DN10760_c0_g1_i1	WBGene00003807	Q18534
ppa_stranded_DN10783_c0_g1_i1	WBGene00010135	P90889
ppa_stranded_DN10942_c1_g1_i1	WBGene00013856	Q23247
ppa_stranded_DN10949_c0_g1_i1	WBGene00003247	Q23356
ppa_stranded_DN11082_c0_g1_i1	WBGene00011561	Q22288
ppa_stranded_DN1110_c0_g1_i1	WBGene00007549	O01927
ppa_stranded_DN11146_c0_g2_i1	WBGene00018069	Q20074
ppa_stranded_DN11203_c1_g1_i1	WBGene00000067	O45815
ppa_stranded_DN11269_c0_g1_i1	WBGene00005893	Q21685
ppa_stranded_DN11294_c0_g1_i1	WBGene00010135	P90889
ppa_stranded_DN11330_c0_g1_i1	WBGene00022054	G4SNS6
ppa_stranded_DN11333_c0_g2_i1	WBGene00044791	Q1ZXU0
ppa_stranded_DN11342_c0_g1_i1	WBGene00022582	P34539
ppa_stranded_DN11357_c0_g1_i1	WBGene00006148	O62280
ppa_stranded_DN11375_c0_g1_i1	WBGene00011154	Q21856
ppa_stranded_DN11456_c0_g2_i1	WBGene00005022	Q19905
ppa_stranded_DN11460_c0_g1_i1	WBGene00006948	Q20677
ppa_stranded_DN11530_c0_g1_i1	WBGene00002215	P46822
ppa_stranded_DN11605_c0_g1_i1	WBGene00012137	Q22851
ppa_stranded_DN11605_c1_g1_i1	WBGene00012137	Q22851
ppa_stranded_DN11650_c0_g1_i1	WBGene00019478	Q21265
ppa_stranded_DN11659_c0_g2_i1	WBGene00004005	Q19015
ppa_stranded_DN11692_c0_g1_i1	WBGene00185048	B3CKG1
ppa_stranded_DN11705_c0_g1_i1	WBGene00045053	A4V4W7
ppa_stranded_DN11722_c0_g1_i1	WBGene00020323	Q22321
ppa_stranded_DN11767_c0_g1_i1	WBGene00019823	O44501
ppa_stranded_DN1179_c0_g1_i1	WBGene00006124	O18040
ppa_stranded_DN11884_c0_g1_i1	WBGene00011740	Q22438
ppa_stranded_DN11895_c0_g1_i1	WBGene00007385	Q17763
ppa_stranded_DN11896_c0_g1_i1	WBGene00022158	H2KZF3
ppa_stranded_DN11915_c0_g2_i1	WBGene00043049	G5EES4
ppa_stranded_DN11935_c0_g1_i1	WBGene00021844	Q9N3D0
ppa_stranded_DN1205_c0_g1_i1	WBGene00003169	G5EFQ9
ppa_stranded_DN12053_c0_g1_i1	WBGene00010628	G5EDL5
ppa_stranded_DN12118_c0_g1_i1	WBGene00003100	O18214
ppa_stranded_DN12152_c0_g1_i1	WBGene00017645	Q95QK1
ppa_stranded_DN12196_c0_g1_i1	WBGene00019893	Q21746
ppa_stranded_DN12218_c0_g1_i1	WBGene00004807	G5ECU1
ppa_stranded_DN12219_c0_g1_i1	WBGene00000623	Q1EPL5
ppa_stranded_DN12271_c0_g1_i1	WBGene00004807	G5ECU1
ppa_stranded_DN12272_c0_g1_i1	WBGene00010594	Q21254
ppa_stranded_DN12292_c0_g1_i1	WBGene00017780	G4SF79
ppa_stranded_DN12293_c0_g1_i1	WBGene00020369	Q22352
ppa_stranded_DN12331_c0_g2_i1	WBGene00022450	A0A2K5ATR7
ppa_stranded_DN12354_c0_g1_i1	WBGene00004026	Q9XUP0
ppa_stranded_DN12359_c0_g2_i1	WBGene00017131	Q95QN9
ppa_stranded_DN12367_c0_g2_i1	WBGene00006061	H2FLJ1
ppa_stranded_DN12373_c0_g1_i1	WBGene00013855	Q20911
ppa_stranded_DN12374_c0_g1_i1	WBGene00016439	Q8WQG1
ppa_stranded_DN12376_c0_g2_i1	WBGene00004301	G5EC82
ppa_stranded_DN12382_c0_g1_i1	WBGene00000787	Q95NM6
ppa_stranded_DN12397_c0_g1_i1	WBGene00004924	P91493
ppa_stranded_DN1243_c0_g1_i1	WBGene00010010	Q93779
ppa_stranded_DN12437_c0_g1_i1	WBGene00001665	P28052
ppa_stranded_DN125_c0_g1_i1	WBGene00010960	P24888
ppa_stranded_DN12515_c0_g2_i1	WBGene00008930	O01323
ppa_stranded_DN12568_c0_g2_i1	WBGene00009997	Q7JLC8
ppa_stranded_DN12609_c0_g1_i1	WBGene00008459	Q7YX52
ppa_stranded_DN12661_c0_g1_i1	WBGene00014027	P30636
ppa_stranded_DN12664_c0_g1_i1	WBGene00008061	Q93367
ppa_stranded_DN12672_c0_g1_i1	WBGene00018211	O16269
ppa_stranded_DN12679_c1_g1_i1	WBGene00001510	Q09649
ppa_stranded_DN12719_c0_g2_i1	WBGene00017995	Q95QH2
ppa_stranded_DN12734_c0_g1_i1	WBGene00004281	Q9XWR6
ppa_stranded_DN12783_c0_g2_i1	WBGene00021977	Q966A6
ppa_stranded_DN12804_c0_g1_i1	WBGene00004875	O02655
ppa_stranded_DN12806_c0_g1_i1	WBGene00019779	Q9GYM9
ppa_stranded_DN12809_c0_g1_i1	WBGene00001975	Q94234
ppa_stranded_DN1281_c0_g1_i1	WBGene00044423	Q4TT81
ppa_stranded_DN12824_c0_g1_i1	WBGene00001952	Q10007
ppa_stranded_DN12843_c0_g1_i1	WBGene00003848	A0A5E4LYJ4
ppa_stranded_DN12862_c0_g1_i1	WBGene00016975	Q18895
ppa_stranded_DN12886_c0_g1_i1	WBGene00013539	F3Y5R7
ppa_stranded_DN12957_c0_g1_i1	WBGene00021322	Q95Y29
ppa_stranded_DN12997_c0_g2_i1	WBGene00022246	Q9GUF1
ppa_stranded_DN13022_c0_g1_i1	WBGene00007755	P90755
ppa_stranded_DN13040_c0_g1_i1	WBGene00016147	Q27472
ppa_stranded_DN13080_c0_g2_i1	WBGene00008226	Q18728
ppa_stranded_DN13087_c0_g1_i1	WBGene00009406	Q8I4J7
ppa_stranded_DN13253_c0_g1_i1	WBGene00022471	Q95Y82
ppa_stranded_DN13264_c0_g2_i1	WBGene00021514	Q95Y11
ppa_stranded_DN13338_c0_g1_i1	WBGene00007530	Q17910
ppa_stranded_DN13341_c0_g2_i1	WBGene00011401	Q8WQD3
ppa_stranded_DN13392_c0_g2_i1	WBGene00018206	O16276
ppa_stranded_DN13491_c0_g1_i1	WBGene00019477	Q21266
ppa_stranded_DN13533_c0_g1_i1	WBGene00012803	O45934
ppa_stranded_DN13621_c0_g1_i1	WBGene00003380	Q17895
ppa_stranded_DN1369_c0_g1_i1	WBGene00012484	Q9XW17
ppa_stranded_DN13706_c0_g1_i1	WBGene00009041	Q19707
ppa_stranded_DN13768_c0_g2_i1	WBGene00044069	Q21484
ppa_stranded_DN13778_c0_g2_i1	WBGene00010947	Q86NF6
ppa_stranded_DN13795_c0_g2_i1	WBGene00011315	G5EGQ5
ppa_stranded_DN13834_c0_g1_i1	WBGene00001743	P34512
ppa_stranded_DN13896_c0_g1_i1	WBGene00000263	O01917
ppa_stranded_DN13924_c0_g1_i1	WBGene00000933	G5EFC8
ppa_stranded_DN14056_c0_g1_i1	WBGene00016874	Q18773
ppa_stranded_DN14206_c0_g1_i1	WBGene00023416	Q8MPZ7
ppa_stranded_DN14237_c0_g2_i1	WBGene00012762	O62436
ppa_stranded_DN14294_c0_g2_i1	WBGene00016844	P53589
ppa_stranded_DN143_c0_g1_i1	WBGene00004430	O45946
ppa_stranded_DN14327_c0_g1_i1	WBGene00001788	O45115
ppa_stranded_DN14344_c0_g1_i1	WBGene00009740	O02267
ppa_stranded_DN14401_c0_g2_i1	WBGene00021350	Q9BKU5
ppa_stranded_DN14492_c0_g2_i1	WBGene00020550	Q22537
ppa_stranded_DN14532_c0_g1_i1	WBGene00022789	Q23580
ppa_stranded_DN1467_c0_g1_i1	WBGene00018516	Q20483
ppa_stranded_DN14711_c0_g1_i1	WBGene00007413	O17580
ppa_stranded_DN14736_c0_g1_i1	WBGene00016732	Q9GYJ3
ppa_stranded_DN14759_c0_g1_i1	WBGene00008820	Q19465
ppa_stranded_DN14763_c0_g2_i1	WBGene00008586	Q19211
ppa_stranded_DN14789_c0_g1_i1	WBGene00009681	Q20393
ppa_stranded_DN14854_c0_g1_i1	WBGene00003922	O17586
ppa_stranded_DN14977_c0_g2_i1	WBGene00004886	Q9N405
ppa_stranded_DN15006_c0_g1_i1	WBGene00019875	Q9TYP9
ppa_stranded_DN15018_c0_g1_i1	WBGene00003142	Q9U1X7
ppa_stranded_DN15079_c0_g1_i1	WBGene00012829	Q9XWP1
ppa_stranded_DN15094_c0_g2_i1	WBGene00018240	Q9TZ68
ppa_stranded_DN15126_c0_g1_i1	WBGene00022643	O61865
ppa_stranded_DN15177_c0_g1_i1	WBGene00011634	P45965
ppa_stranded_DN15194_c0_g1_i1	WBGene00016235	Q18315
ppa_stranded_DN15200_c0_g1_i1	WBGene00016059	O76385
ppa_stranded_DN15201_c0_g1_i1	WBGene00006324	G5EFD9
ppa_stranded_DN15215_c0_g1_i1	WBGene00013266	Q9NA74
ppa_stranded_DN15223_c0_g1_i1	WBGene00022540	O76701
ppa_stranded_DN15247_c0_g2_i1	WBGene00000761	P91093
ppa_stranded_DN15284_c0_g1_i1	WBGene00045407	A5JYR6
ppa_stranded_DN15312_c0_g1_i1	WBGene00021367	U4PBL3
ppa_stranded_DN15323_c0_g2_i1	WBGene00018984	P90893
ppa_stranded_DN15349_c0_g1_i1	WBGene00017902	Q19883
ppa_stranded_DN15351_c0_g3_i1	WBGene00016325	P91130
ppa_stranded_DN15371_c0_g1_i1	WBGene00006620	Q17800
ppa_stranded_DN15377_c0_g1_i1	WBGene00022392	Q965S1
ppa_stranded_DN15378_c0_g1_i2	WBGene00022782	Q95PW6
ppa_stranded_DN15386_c0_g1_i1	WBGene00022611	Q23328
ppa_stranded_DN15390_c0_g1_i1	WBGene00018421	P34438
ppa_stranded_DN154_c0_g1_i1	WBGene00010904	Q21603
ppa_stranded_DN15404_c0_g1_i1	WBGene00011280	P50444
ppa_stranded_DN15405_c0_g1_i1	WBGene00011105	Q21809
ppa_stranded_DN15406_c1_g1_i1	WBGene00008414	P90789
ppa_stranded_DN15428_c0_g1_i1	WBGene00020049	Q95Y93
ppa_stranded_DN15506_c0_g1_i1	WBGene00019482	Q21273
ppa_stranded_DN15512_c0_g2_i1	WBGene00008664	Q93459
ppa_stranded_DN15514_c0_g2_i1	WBGene00016938	Q18862
ppa_stranded_DN15536_c0_g2_i1	WBGene00001155	P34559
ppa_stranded_DN15548_c0_g1_i1	WBGene00009121	Q93570
ppa_stranded_DN15552_c0_g1_i1	WBGene00006936	Q9U1Q4
ppa_stranded_DN15579_c0_g1_i1	WBGene00022025	Q9BL57
ppa_stranded_DN15584_c0_g2_i1	WBGene00019424	Q09585
ppa_stranded_DN15601_c0_g1_i1	WBGene00014108	Q23642
ppa_stranded_DN15603_c0_g1_i1	WBGene00008919	Q19519
ppa_stranded_DN15609_c0_g2_i1	WBGene00000702	Q19368
ppa_stranded_DN15615_c0_g1_i1	WBGene00019669	O16381
ppa_stranded_DN15635_c0_g1_i1	WBGene00004005	Q19015
ppa_stranded_DN15646_c0_g1_i1	WBGene00000373	Q27531
ppa_stranded_DN15646_c0_g3_i1	WBGene00010706	Q27505
ppa_stranded_DN15650_c0_g1_i1	WBGene00022683	O44195
ppa_stranded_DN15652_c0_g1_i1	WBGene00009945	Q20681
ppa_stranded_DN15670_c0_g2_i1	WBGene00010450	Q21069
ppa_stranded_DN15672_c0_g1_i1	WBGene00020708	Q9TXN8
ppa_stranded_DN15688_c0_g1_i1	WBGene00044236	Q564W8
ppa_stranded_DN15703_c0_g1_i1	WBGene00021417	Q9N418
ppa_stranded_DN15707_c0_g1_i1	WBGene00012205	Q23126
ppa_stranded_DN15715_c0_g2_i1	WBGene00013856	Q23247
ppa_stranded_DN15720_c0_g1_i1	WBGene00022455	Q9N588
ppa_stranded_DN15731_c0_g1_i2	WBGene00077526	B0M0N2
ppa_stranded_DN15732_c0_g1_i3	WBGene00000276	Q20932
ppa_stranded_DN15756_c0_g1_i1	WBGene00018071	Q20070
ppa_stranded_DN15763_c0_g1_i1	WBGene00008996	O17824
ppa_stranded_DN15776_c0_g1_i1	WBGene00012828	H8ESF1
ppa_stranded_DN15789_c0_g1_i1	WBGene00020482	Q7JP79
ppa_stranded_DN15791_c0_g3_i1	WBGene00001590	O45303
ppa_stranded_DN15795_c0_g1_i1	WBGene00013332	Q7YTI4
ppa_stranded_DN15807_c0_g2_i2	WBGene00003066	A0A1N7SYX2
ppa_stranded_DN15811_c0_g1_i1	WBGene00019029	Q336K8
ppa_stranded_DN15817_c0_g1_i2	WBGene00014222	P34605
ppa_stranded_DN15819_c0_g1_i2	WBGene00004306	Q21961
ppa_stranded_DN15863_c0_g1_i2	WBGene00018484	Q9GYP2
ppa_stranded_DN15864_c0_g2_i1	WBGene00008288	Q86D25
ppa_stranded_DN15873_c0_g2_i1	WBGene00000165	Q8T874
ppa_stranded_DN15877_c0_g1_i1	WBGene00003161	Q9NGT3
ppa_stranded_DN15886_c0_g1_i1	WBGene00008683	Q19335
ppa_stranded_DN15927_c0_g2_i1	WBGene00005945	Q9XX72
ppa_stranded_DN15947_c0_g1_i1	WBGene00011471	Q22229
ppa_stranded_DN15990_c0_g2_i1	WBGene00002981	Q23536
ppa_stranded_DN16002_c0_g1_i1	WBGene00016355	Q18384
ppa_stranded_DN16006_c0_g1_i2	WBGene00000888	Q18445
ppa_stranded_DN16009_c0_g1_i1	WBGene00012586	Q9NAK3
ppa_stranded_DN16014_c0_g1_i2	WBGene00009513	O17863
ppa_stranded_DN16015_c0_g1_i1	WBGene00010470	G5EDZ7
ppa_stranded_DN16028_c0_g1_i1	WBGene00015214	Q17519
ppa_stranded_DN16041_c0_g1_i1	WBGene00012738	Q9XWP7
ppa_stranded_DN16047_c0_g1_i1	WBGene00006542	P32085
ppa_stranded_DN16052_c0_g2_i1	WBGene00014234	Q86D99
ppa_stranded_DN16077_c0_g3_i1	WBGene00016989	O44159
ppa_stranded_DN16130_c0_g2_i1	WBGene00015309	V6CIV2
ppa_stranded_DN16152_c0_g2_i1	WBGene00017317	O17406
ppa_stranded_DN16165_c0_g1_i1	WBGene00021160	Q9UB00
ppa_stranded_DN16189_c0_g2_i1	WBGene00012776	Q9U2H2
ppa_stranded_DN16198_c0_g1_i1	WBGene00018261	O16671
ppa_stranded_DN16199_c0_g1_i1	WBGene00018216	O16267
ppa_stranded_DN16203_c0_g1_i1	WBGene00019286	Q10041
ppa_stranded_DN16220_c0_g1_i1	WBGene00018275	Q20261
ppa_stranded_DN16221_c0_g1_i1	WBGene00007994	Q93354
ppa_stranded_DN16233_c0_g2_i1	WBGene00015283	Q17540
ppa_stranded_DN16233_c1_g1_i1	WBGene00015283	Q17540
ppa_stranded_DN16239_c0_g1_i1	WBGene00003602	Q9XTJ4
ppa_stranded_DN16250_c0_g2_i1	WBGene00016607	P91154
ppa_stranded_DN16262_c0_g2_i1	WBGene00002179	Q22667
ppa_stranded_DN16268_c0_g2_i1	WBGene00007780	Q93291
ppa_stranded_DN16270_c0_g2_i1	WBGene00001844	G5EG65
ppa_stranded_DN16276_c0_g1_i1	WBGene00020995	H2KZ04
ppa_stranded_DN16282_c0_g2_i1	WBGene00009896	G5EF50
ppa_stranded_DN16291_c0_g1_i1	WBGene00019803	H2KZN1
ppa_stranded_DN16305_c0_g1_i1	WBGene00005010	Q9XWP6
ppa_stranded_DN16308_c0_g1_i1	WBGene00004919	Q9XTU6
ppa_stranded_DN16317_c0_g1_i1	WBGene00017698	P34412
ppa_stranded_DN16336_c0_g1_i1	WBGene00011336	Q7YWU9
ppa_stranded_DN16339_c0_g1_i1	WBGene00044690	Q2PJ80
ppa_stranded_DN16349_c0_g1_i3	WBGene00007913	P90771
ppa_stranded_DN16353_c0_g2_i1	WBGene00007848	Q93315
ppa_stranded_DN16364_c0_g1_i1	WBGene00019496	O16687
ppa_stranded_DN16374_c0_g1_i1	WBGene00021815	Q9N3G1
ppa_stranded_DN16402_c0_g1_i2	WBGene00019698	O44959
ppa_stranded_DN16418_c0_g1_i2	WBGene00011422	Q22147
ppa_stranded_DN16419_c0_g1_i1	WBGene00018797	O44732
ppa_stranded_DN16422_c0_g1_i1	WBGene00018481	E1B6Q7
ppa_stranded_DN16446_c0_g1_i2	WBGene00012244	Q23155
ppa_stranded_DN16448_c0_g2_i1	WBGene00021645	H2L0D7
ppa_stranded_DN16452_c0_g3_i1	WBGene00001153	Q09603
ppa_stranded_DN16469_c0_g2_i1	WBGene00016231	O16886
ppa_stranded_DN16480_c0_g1_i1	WBGene00009408	A0A5K1I864
ppa_stranded_DN16484_c0_g1_i1	WBGene00021778	Q9N3K1
ppa_stranded_DN16485_c0_g1_i1	WBGene00011561	Q22288
ppa_stranded_DN16485_c0_g2_i1	WBGene00012383	Q9XWL1
ppa_stranded_DN16486_c0_g1_i1	WBGene00016621	Q9TZN1
ppa_stranded_DN16492_c0_g2_i1	WBGene00005893	Q21685
ppa_stranded_DN16501_c0_g1_i4	WBGene00011605	G5EEQ8
ppa_stranded_DN16509_c0_g2_i1	WBGene00017146	G4SBR5
ppa_stranded_DN16513_c0_g1_i1	WBGene00008081	Q18605
ppa_stranded_DN16527_c0_g1_i1	WBGene00016589	G5EFT4
ppa_stranded_DN16529_c0_g2_i1	WBGene00000780	O44727
ppa_stranded_DN16530_c0_g1_i1	WBGene00016404	Q18446
ppa_stranded_DN16532_c0_g1_i1	WBGene00019295	Q21122
ppa_stranded_DN16535_c0_g1_i1	WBGene00017719	Q9GZE9
ppa_stranded_DN16537_c0_g1_i1	WBGene00009563	G5EE11
ppa_stranded_DN16539_c0_g1_i1	WBGene00022271	Q9GUM7
ppa_stranded_DN16542_c0_g2_i1	WBGene00009124	Q93575
ppa_stranded_DN16547_c0_g1_i1	WBGene00010055	G5EE46
ppa_stranded_DN16548_c0_g1_i1	WBGene00001069	P34688
ppa_stranded_DN16553_c0_g1_i1	WBGene00015333	P34272
ppa_stranded_DN16557_c0_g1_i1	WBGene00017002	O01871
ppa_stranded_DN1656_c0_g1_i1	WBGene00011247	Q21939
ppa_stranded_DN16562_c0_g1_i1	WBGene00007043	O02332
ppa_stranded_DN16567_c0_g1_i2	WBGene00022089	Q95XJ0
ppa_stranded_DN16571_c0_g1_i1	WBGene00000711	A3QM98
ppa_stranded_DN16575_c0_g2_i1	WBGene00009058	G5ED57
ppa_stranded_DN16577_c0_g1_i1	WBGene00000681	Q86S35
ppa_stranded_DN16580_c0_g1_i1	WBGene00077500	A9QY30
ppa_stranded_DN16586_c0_g1_i1	WBGene00009417	B6EU68
ppa_stranded_DN16592_c0_g1_i1	WBGene00009554	O45496
ppa_stranded_DN16596_c0_g2_i1	WBGene00006667	Q19907
ppa_stranded_DN16617_c0_g1_i1	WBGene00020479	Q7JP78
ppa_stranded_DN16622_c0_g1_i1	WBGene00001715	Q94273
ppa_stranded_DN16635_c0_g1_i1	WBGene00003970	Q19192
ppa_stranded_DN16638_c0_g1_i1	WBGene00050937	A8WHS8
ppa_stranded_DN16647_c0_g1_i2	WBGene00009930	Q20652
ppa_stranded_DN16650_c0_g1_i1	WBGene00020327	O76608
ppa_stranded_DN16657_c0_g1_i1	WBGene00011468	Q22225
ppa_stranded_DN16670_c0_g2_i1	WBGene00022256	Q8MXQ8
ppa_stranded_DN16687_c0_g1_i1	WBGene00006638	Q22495
ppa_stranded_DN16691_c0_g1_i1	WBGene00000289	G5EGK5
ppa_stranded_DN16698_c0_g1_i1	WBGene00001588	Q10052
ppa_stranded_DN16701_c0_g1_i1	WBGene00008027	Q18543
ppa_stranded_DN16703_c0_g1_i1	WBGene00022793	P34669
ppa_stranded_DN16706_c0_g1_i1	WBGene00045192	Q21221
ppa_stranded_DN16719_c0_g1_i1	WBGene00003659	P91829
ppa_stranded_DN16721_c0_g1_i1	WBGene00005095	Q9U2P4
ppa_stranded_DN16723_c0_g1_i1	WBGene00018839	P91332
ppa_stranded_DN16746_c0_g2_i1	WBGene00012383	Q9XWL1
ppa_stranded_DN16775_c0_g3_i1	WBGene00012261	G5EEA2
ppa_stranded_DN16776_c0_g2_i1	WBGene00006571	G5EDN3
ppa_stranded_DN16776_c1_g2_i1	WBGene00000520	Q21829
ppa_stranded_DN16812_c0_g1_i1	WBGene00013284	G5EDP2
ppa_stranded_DN16824_c0_g1_i1	WBGene00011645	Q09350
ppa_stranded_DN16828_c0_g1_i1	WBGene00000985	Q9XVS9
ppa_stranded_DN16830_c0_g1_i1	WBGene00011065	Q21775
ppa_stranded_DN16831_c0_g1_i1	WBGene00013540	Q9XW75
ppa_stranded_DN16836_c0_g1_i1	WBGene00019917	O16778
ppa_stranded_DN16838_c0_g2_i1	WBGene00011255	Q21967
ppa_stranded_DN16839_c0_g1_i1	WBGene00012756	Q9U2I4
ppa_stranded_DN16840_c0_g2_i2	WBGene00006934	Q22639
ppa_stranded_DN16845_c0_g2_i2	WBGene00012407	Q9XVZ2
ppa_stranded_DN16846_c0_g1_i1	WBGene00012251	Q9XUL6
ppa_stranded_DN16865_c0_g2_i1	WBGene00013008	O18202
ppa_stranded_DN16924_c0_g1_i1	WBGene00004311	G5EGA7
ppa_stranded_DN16928_c0_g2_i1	WBGene00001463	Q95QP2
ppa_stranded_DN16963_c0_g1_i1	WBGene00000220	Q21361
ppa_stranded_DN16986_c1_g1_i1	WBGene00008491	Q7YTQ3
ppa_stranded_DN16987_c0_g1_i1	WBGene00009157	O18686
ppa_stranded_DN17015_c0_g1_i1	WBGene00270319	A0A1D3PCN1
ppa_stranded_DN17016_c0_g1_i1	WBGene00013597	Q7K707
ppa_stranded_DN17077_c0_g1_i1	WBGene00000204	P58798
ppa_stranded_DN17091_c0_g2_i1	WBGene00003581	Q9U2M7
ppa_stranded_DN17109_c0_g3_i1	WBGene00077453	A9IHM9
ppa_stranded_DN17125_c0_g1_i1	WBGene00014106	Q23640
ppa_stranded_DN17129_c0_g1_i1	WBGene00044410	A0A0K3AX60
ppa_stranded_DN1713_c0_g1_i1	WBGene00011571	Q22285
ppa_stranded_DN17179_c0_g1_i1	WBGene00000636	Q19725
ppa_stranded_DN17210_c0_g1_i1	WBGene00001950	Q22717
ppa_stranded_DN17263_c0_g1_i1	WBGene00044124	Q5BHI1
ppa_stranded_DN17344_c0_g2_i1	WBGene00005195	Q86GC0
ppa_stranded_DN17350_c0_g1_i2	WBGene00010793	O17954
ppa_stranded_DN17356_c0_g1_i1	WBGene00006695	Q9BL31
ppa_stranded_DN17375_c0_g2_i1	WBGene00004308	O17599
ppa_stranded_DN17384_c0_g1_i1	WBGene00009403	Q20021
ppa_stranded_DN17388_c0_g1_i1	WBGene00022027	Q9BL60
ppa_stranded_DN17401_c0_g1_i1	WBGene00015956	H2KYV3
ppa_stranded_DN17404_c0_g1_i1	WBGene00000526	Q9NGJ7
ppa_stranded_DN17432_c0_g1_i1	WBGene00007304	Q17629
ppa_stranded_DN17442_c0_g1_i1	WBGene00015184	P90994
ppa_stranded_DN17459_c0_g1_i1	WBGene00020030	O61795
ppa_stranded_DN17469_c0_g1_i1	WBGene00006193	Q9GS10
ppa_stranded_DN17476_c0_g1_i1	WBGene00016283	G5EBU3
ppa_stranded_DN17483_c0_g1_i1	WBGene00007022	Q23679
ppa_stranded_DN17487_c0_g1_i1	WBGene00017756	Q95QJ3
ppa_stranded_DN17488_c0_g1_i2	WBGene00009505	Q20118
ppa_stranded_DN17490_c0_g1_i1	WBGene00021006	O01778
ppa_stranded_DN17501_c0_g1_i1	WBGene00018955	O44975
ppa_stranded_DN17503_c0_g2_i1	WBGene00013376	Q9U1X0
ppa_stranded_DN17508_c0_g1_i1	WBGene00009812	P53588
ppa_stranded_DN17512_c0_g1_i1	WBGene00022060	Q95XU1
ppa_stranded_DN17517_c0_g1_i1	WBGene00009011	Q19684
ppa_stranded_DN17544_c0_g1_i2	WBGene00015347	P34281
ppa_stranded_DN17546_c0_g1_i1	WBGene00011089	Q21795
ppa_stranded_DN17574_c0_g2_i1	WBGene00020460	Q95QB3
ppa_stranded_DN17589_c0_g1_i1	WBGene00003134	Q19294
ppa_stranded_DN17590_c0_g1_i1	WBGene00003247	Q23356
ppa_stranded_DN17614_c0_g1_i1	WBGene00004193	Q18028
ppa_stranded_DN17623_c0_g1_i1	WBGene00016990	O44158
ppa_stranded_DN17625_c0_g1_i1	WBGene00000525	Q22191
ppa_stranded_DN17640_c0_g1_i1	WBGene00019076	P91353
ppa_stranded_DN17644_c0_g1_i1	WBGene00044468	Q3V5J7
ppa_stranded_DN17650_c0_g2_i1	WBGene00001667	Q20701
ppa_stranded_DN17663_c0_g2_i1	WBGene00018070	Q20071
ppa_stranded_DN17664_c0_g1_i1	WBGene00011508	Q09347
ppa_stranded_DN1767_c0_g2_i1	WBGene00011630	Q94012
ppa_stranded_DN17671_c0_g2_i1	WBGene00015030	O01429
ppa_stranded_DN17674_c0_g1_i1	WBGene00015471	Q9GYK0
ppa_stranded_DN17677_c0_g1_i1	WBGene00016663	O44962
ppa_stranded_DN17724_c0_g1_i1	WBGene00011630	Q94012
ppa_stranded_DN17742_c0_g2_i1	WBGene00009551	Q20186
ppa_stranded_DN17760_c0_g2_i1	WBGene00012639	O62425
ppa_stranded_DN17766_c0_g1_i1	WBGene00015670	O16318
ppa_stranded_DN17799_c0_g1_i1	WBGene00009945	Q20681
ppa_stranded_DN17801_c0_g2_i1	WBGene00022750	H2KZ16
ppa_stranded_DN17804_c0_g1_i1	WBGene00014170	Q09384
ppa_stranded_DN17822_c0_g3_i1	WBGene00012201	Q23119
ppa_stranded_DN17823_c0_g4_i1	WBGene00021628	Q9N4V3
ppa_stranded_DN17824_c0_g1_i1	WBGene00001786	O45451
ppa_stranded_DN17827_c0_g1_i1	WBGene00009013	Q19685
ppa_stranded_DN17839_c0_g2_i1	WBGene00001739	D6VP99
ppa_stranded_DN17866_c0_g1_i1	WBGene00012722	Q9NAI5
ppa_stranded_DN17869_c1_g1_i1	WBGene00001031	Q20774
ppa_stranded_DN17870_c0_g1_i2	WBGene00001632	O61397
ppa_stranded_DN17880_c0_g1_i1	WBGene00004199	Q93930
ppa_stranded_DN17888_c0_g1_i1	WBGene00019467	O01886
ppa_stranded_DN17889_c0_g1_i1	WBGene00003186	Q10664
ppa_stranded_DN17900_c0_g3_i1	WBGene00018112	O16620
ppa_stranded_DN17902_c0_g1_i1	WBGene00009453	G5EDM5
ppa_stranded_DN17905_c0_g1_i1	WBGene00010134	P90891
ppa_stranded_DN17907_c0_g2_i1	WBGene00022153	Q95XN5
ppa_stranded_DN17911_c0_g1_i1	WBGene00021764	Q8WTJ9
ppa_stranded_DN17912_c0_g2_i1	WBGene00015333	P34272
ppa_stranded_DN17913_c0_g2_i1	WBGene00008692	Q19344
ppa_stranded_DN17918_c0_g2_i1	WBGene00020808	Q23050
ppa_stranded_DN17923_c0_g1_i2	WBGene00010159	Q9XUY1
ppa_stranded_DN17927_c0_g1_i1	WBGene00003403	Q27GU3
ppa_stranded_DN17928_c0_g1_i1	WBGene00009010	Q19683
ppa_stranded_DN17939_c0_g1_i1	WBGene00008506	O17759
ppa_stranded_DN17946_c0_g1_i1	WBGene00020037	O61791
ppa_stranded_DN17948_c0_g1_i1	WBGene00011232	O02286
ppa_stranded_DN17951_c0_g1_i1	WBGene00009236	Q19890
ppa_stranded_DN17958_c0_g1_i1	WBGene00017826	Q19819
ppa_stranded_DN17999_c0_g1_i1	WBGene00019891	Q21741
ppa_stranded_DN18004_c0_g1_i1	WBGene00011412	Q22140
ppa_stranded_DN18010_c0_g3_i1	WBGene00021331	Q9N456
ppa_stranded_DN18013_c1_g1_i1	WBGene00006148	O62280
ppa_stranded_DN18023_c0_g1_i1	WBGene00008890	G5EBX8
ppa_stranded_DN18038_c0_g1_i1	WBGene00010437	Q95QD5
ppa_stranded_DN18041_c0_g1_i1	WBGene00000480	Q18905
ppa_stranded_DN18046_c0_g1_i1	WBGene00018064	Q9N5U5
ppa_stranded_DN18062_c0_g3_i1	WBGene00014111	Q23645
ppa_stranded_DN18064_c0_g2_i1	WBGene00010616	P90915
ppa_stranded_DN18069_c0_g1_i1	WBGene00304985	A0A5K1IB80
ppa_stranded_DN18074_c0_g3_i1	WBGene00019767	Q95Y97
ppa_stranded_DN18077_c0_g2_i1	WBGene00000187	Q20758
ppa_stranded_DN18088_c0_g1_i1	WBGene00011037	Q95ZR2
ppa_stranded_DN18102_c0_g1_i1	WBGene00001432	O61826
ppa_stranded_DN18104_c0_g1_i1	WBGene00020049	Q95Y93
ppa_stranded_DN18125_c0_g1_i1	WBGene00016966	Q18888
ppa_stranded_DN18126_c0_g1_i1	WBGene00012678	Q8MYP1
ppa_stranded_DN18133_c0_g1_i1	WBGene00007913	P90771
ppa_stranded_DN18155_c0_g1_i1	WBGene00009945	Q20681
ppa_stranded_DN18159_c0_g2_i1	WBGene00017121	P19974
ppa_stranded_DN18163_c0_g1_i1	WBGene00007304	Q17629
ppa_stranded_DN18164_c0_g1_i1	WBGene00000917	Q9N3Q8
ppa_stranded_DN18168_c0_g1_i1	WBGene00022057	Q9BKQ7
ppa_stranded_DN18169_c0_g1_i1	WBGene00000977	Q9N5G3
ppa_stranded_DN18177_c0_g2_i1	WBGene00008336	P90781
ppa_stranded_DN18182_c0_g3_i1	WBGene00003634	Q22555
ppa_stranded_DN18193_c0_g1_i1	WBGene00018088	Q20100
ppa_stranded_DN18203_c0_g1_i1	WBGene00007144	Q17476
ppa_stranded_DN18204_c0_g1_i1	WBGene00017245	P91240
ppa_stranded_DN18216_c0_g1_i1	WBGene00003674	O45756
ppa_stranded_DN18218_c0_g1_i1	WBGene00022666	Q94313
ppa_stranded_DN18219_c0_g1_i1	WBGene00006886	Q8MQ79
ppa_stranded_DN18223_c0_g1_i3	WBGene00010942	Q21551
ppa_stranded_DN18225_c0_g1_i1	WBGene00013026	Q9XW93
ppa_stranded_DN18229_c0_g1_i1	WBGene00010706	Q27505
ppa_stranded_DN18236_c0_g2_i1	WBGene00006156	O45972
ppa_stranded_DN18247_c0_g2_i1	WBGene00001931	J7SA65
ppa_stranded_DN18259_c0_g2_i1	WBGene00021160	Q9UB00
ppa_stranded_DN18275_c0_g1_i1	WBGene00021935	C0VXV6
ppa_stranded_DN18279_c0_g1_i1	WBGene00013540	Q9XW75
ppa_stranded_DN18281_c0_g1_i1	WBGene00018990	Q9TZ64
ppa_stranded_DN18297_c0_g1_i1	WBGene00016383	Q18418
ppa_stranded_DN18301_c0_g1_i1	WBGene00013551	Q9U1S3
ppa_stranded_DN18311_c0_g1_i1	WBGene00017719	Q9GZE9
ppa_stranded_DN18318_c0_g1_i1	WBGene00003914	Q4TT88
ppa_stranded_DN18326_c0_g1_i1	WBGene00013269	Q9NA72
ppa_stranded_DN18328_c0_g2_i1	WBGene00001443	P34268
ppa_stranded_DN18338_c0_g1_i1	WBGene00009980	P91997
ppa_stranded_DN18360_c0_g1_i4	WBGene00006915	G5EGP4
ppa_stranded_DN18367_c1_g1_i1	WBGene00000218	O01532
ppa_stranded_DN18385_c0_g1_i1	WBGene00000137	Q21988
ppa_stranded_DN18386_c0_g1_i1	WBGene00010094	Q20819
ppa_stranded_DN18407_c0_g1_i1	WBGene00000375	Q09660
ppa_stranded_DN18410_c0_g2_i1	WBGene00011029	O45707
ppa_stranded_DN18413_c0_g1_i1	WBGene00017950	Q8MYQ1
ppa_stranded_DN1842_c0_g1_i1	WBGene00018709	Q9UAR1
ppa_stranded_DN18422_c0_g1_i1	WBGene00003660	G5EEL3
ppa_stranded_DN18423_c0_g2_i1	WBGene00014022	P30629
ppa_stranded_DN18429_c0_g2_i1	WBGene00008371	Q18949
ppa_stranded_DN18438_c0_g2_i1	WBGene00018239	C0Z1Y7
ppa_stranded_DN18440_c0_g1_i1	WBGene00020633	O02168
ppa_stranded_DN18441_c0_g2_i1	WBGene00000050	P91197
ppa_stranded_DN18447_c0_g2_i1	WBGene00007686	Q18090
ppa_stranded_DN18452_c0_g1_i1	WBGene00011443	Q22164
ppa_stranded_DN18461_c0_g1_i1	WBGene00020187	P91420
ppa_stranded_DN18470_c0_g1_i1	WBGene00010699	Q9XU81
ppa_stranded_DN18526_c0_g1_i2	WBGene00016896	O45311
ppa_stranded_DN18541_c0_g2_i1	WBGene00011826	Q7YWV6
ppa_stranded_DN18546_c0_g2_i1	WBGene00007099	Q17424
ppa_stranded_DN18548_c0_g1_i1	WBGene00003062	O44991
ppa_stranded_DN18576_c0_g1_i1	WBGene00000429	G5ECT8
ppa_stranded_DN18595_c0_g2_i1	WBGene00007102	Q17428
ppa_stranded_DN18616_c0_g1_i1	WBGene00011308	Q95ZQ5
ppa_stranded_DN18623_c0_g2_i1	WBGene00009121	Q93570
ppa_stranded_DN18634_c0_g1_i2	WBGene00006385	O61707
ppa_stranded_DN18639_c1_g1_i1	WBGene00001497	Q9GYS8
ppa_stranded_DN18640_c0_g1_i1	WBGene00019657	Q2L6Y0
ppa_stranded_DN18652_c0_g2_i1	WBGene00022021	Q9N306
ppa_stranded_DN18654_c0_g1_i1	WBGene00011036	Q21740
ppa_stranded_DN18660_c0_g1_i1	WBGene00008039	Q03573
ppa_stranded_DN18662_c0_g1_i2	WBGene00008425	Q18986
ppa_stranded_DN18666_c0_g1_i1	WBGene00008973	Q93533
ppa_stranded_DN18687_c0_g1_i1	WBGene00013540	Q9XW75
ppa_stranded_DN18691_c0_g2_i1	WBGene00022285	Q965S7
ppa_stranded_DN18697_c0_g1_i2	WBGene00001843	Q9Y041
ppa_stranded_DN18702_c0_g1_i1	WBGene00000378	P47207
ppa_stranded_DN18705_c0_g1_i1	WBGene00001600	O01836
ppa_stranded_DN18713_c0_g1_i1	WBGene00007058	O62159
ppa_stranded_DN18716_c0_g1_i1	WBGene00009120	Q93569
ppa_stranded_DN18718_c0_g1_i1	WBGene00001790	Q18938
ppa_stranded_DN18719_c0_g1_i1	WBGene00021425	G5EDB6
ppa_stranded_DN18743_c0_g1_i1	WBGene00008151	Q18674
ppa_stranded_DN18746_c0_g2_i1	WBGene00004456	Q9U2A8
ppa_stranded_DN18747_c0_g1_i1	WBGene00004214	G5EC24
ppa_stranded_DN18749_c0_g1_i1	WBGene00001229	Q18967
ppa_stranded_DN18772_c0_g1_i1	WBGene00006981	G5ECB1
ppa_stranded_DN18776_c0_g1_i1	WBGene00018847	Q400N4
ppa_stranded_DN18798_c0_g1_i1	WBGene00003079	O18694
ppa_stranded_DN18801_c0_g1_i1	WBGene00003585	Q9NA25
ppa_stranded_DN18802_c0_g1_i1	WBGene00010685	O17939
ppa_stranded_DN18803_c0_g1_i1	WBGene00013362	Q9U1Z2
ppa_stranded_DN18809_c0_g2_i1	WBGene00020893	O16699
ppa_stranded_DN18818_c0_g2_i1	WBGene00000985	Q9XVS9
ppa_stranded_DN18826_c0_g1_i1	WBGene00019426	Q09586
ppa_stranded_DN18829_c0_g1_i1	WBGene00001778	Q23520
ppa_stranded_DN18832_c0_g2_i1	WBGene00001035	O62360
ppa_stranded_DN18833_c0_g2_i1	WBGene00018015	Q19987
ppa_stranded_DN18837_c0_g1_i1	WBGene00021783	E0DBL0
ppa_stranded_DN18838_c0_g1_i1	WBGene00020368	Q22355
ppa_stranded_DN18842_c0_g1_i1	WBGene00011799	Q9XUP8
ppa_stranded_DN18843_c0_g2_i1	WBGene00010830	B6VQ93
ppa_stranded_DN18847_c0_g1_i1	WBGene00021276	Q9N477
ppa_stranded_DN18849_c0_g1_i1	WBGene00006601	Q10657
ppa_stranded_DN18853_c0_g1_i1	WBGene00013187	G5EDR6
ppa_stranded_DN18855_c0_g1_i1	WBGene00012763	O62433
ppa_stranded_DN18856_c0_g1_i1	WBGene00007776	Q18248
ppa_stranded_DN18859_c0_g2_i1	WBGene00004475	Q9NEN6
ppa_stranded_DN18861_c0_g1_i1	WBGene00021325	Q95Y28
ppa_stranded_DN18865_c0_g1_i1	WBGene00002129	Q21123
ppa_stranded_DN18867_c0_g1_i1	WBGene00004952	G5ED58
ppa_stranded_DN18879_c0_g1_i1	WBGene00006702	Q95XN7
ppa_stranded_DN18880_c0_g1_i1	WBGene00022702	P34630
ppa_stranded_DN18881_c0_g2_i1	WBGene00018764	O01579
ppa_stranded_DN18895_c1_g2_i1	WBGene00019986	Q23030
ppa_stranded_DN18897_c0_g1_i1	WBGene00000987	Q9U1Y6
ppa_stranded_DN18907_c0_g3_i1	WBGene00016118	H2KYV1
ppa_stranded_DN18910_c0_g2_i1	WBGene00000443	P41779
ppa_stranded_DN18915_c0_g1_i1	WBGene00007118	Q8I4N3
ppa_stranded_DN18923_c0_g1_i1	WBGene00002368	Q21341
ppa_stranded_DN18927_c0_g1_i1	WBGene00012130	Q8I4F6
ppa_stranded_DN18933_c1_g1_i1	WBGene00016180	Q18280
ppa_stranded_DN18934_c0_g1_i1	WBGene00001697	Q22914
ppa_stranded_DN18937_c0_g2_i1	WBGene00006083	O18069
ppa_stranded_DN18948_c0_g1_i1	WBGene00022123	A4UZ34
ppa_stranded_DN18949_c0_g2_i1	WBGene00010972	Q21622
ppa_stranded_DN18954_c0_g2_i1	WBGene00003682	Q95Y07
ppa_stranded_DN18955_c0_g1_i1	WBGene00001006	G5ECY0
ppa_stranded_DN18965_c0_g2_i1	WBGene00017024	Q18927
ppa_stranded_DN18976_c0_g1_i1	WBGene00000843	Q93561
ppa_stranded_DN18978_c0_g1_i1	WBGene00013190	Q9XWI9
ppa_stranded_DN18982_c0_g1_i1	WBGene00009483	Q09318
ppa_stranded_DN18983_c0_g1_i1	WBGene00138711	B5U8L3
ppa_stranded_DN18985_c0_g1_i1	WBGene00012714	Q9U2K8
ppa_stranded_DN18985_c1_g1_i1	WBGene00008333	P90779
ppa_stranded_DN18990_c0_g1_i1	WBGene00007531	G5EDB0
ppa_stranded_DN18993_c0_g2_i1	WBGene00019911	O44747
ppa_stranded_DN19001_c0_g1_i1	WBGene00022260	Q9N4E2
ppa_stranded_DN19010_c0_g1_i1	WBGene00006059	Q20752
ppa_stranded_DN19011_c0_g2_i1	WBGene00015451	Q9GZC9
ppa_stranded_DN19020_c0_g1_i1	WBGene00019457	P34511
ppa_stranded_DN19022_c0_g1_i1	WBGene00013679	Q9NEX6
ppa_stranded_DN19025_c0_g1_i1	WBGene00016341	O16582
ppa_stranded_DN19026_c0_g1_i1	WBGene00044325	Q95QS6
ppa_stranded_DN19033_c0_g1_i2	WBGene00011765	Q22485
ppa_stranded_DN19053_c0_g1_i1	WBGene00007110	Q17431
ppa_stranded_DN19057_c0_g1_i1	WBGene00011976	Q22718
ppa_stranded_DN19059_c0_g2_i1	WBGene00012085	D1MN75
ppa_stranded_DN19065_c0_g1_i1	WBGene00020605	P41849
ppa_stranded_DN19071_c0_g2_i1	WBGene00009735	O62251
ppa_stranded_DN19073_c0_g1_i1	WBGene00009368	O62218
ppa_stranded_DN19075_c0_g1_i1	WBGene00020267	O16522
ppa_stranded_DN19090_c0_g1_i1	WBGene00018151	Q20122
ppa_stranded_DN19091_c0_g1_i1	WBGene00023489	Q65ZK1
ppa_stranded_DN19093_c0_g3_i1	WBGene00008642	Q9U3K2
ppa_stranded_DN19098_c0_g1_i1	WBGene00020399	Q9TZI2
ppa_stranded_DN19099_c0_g1_i1	WBGene00016059	O76385
ppa_stranded_DN19105_c0_g2_i1	WBGene00021343	A0A164D3B2
ppa_stranded_DN19120_c0_g1_i1	WBGene00017951	P53015
ppa_stranded_DN19122_c0_g2_i1	WBGene00016955	Q18867
ppa_stranded_DN19129_c0_g1_i1	WBGene00022797	P34672
ppa_stranded_DN19131_c0_g1_i1	WBGene00008684	Q19336
ppa_stranded_DN19137_c0_g2_i1	WBGene00009441	Q20059
ppa_stranded_DN19150_c0_g2_i1	WBGene00019296	Q21121
ppa_stranded_DN19152_c0_g1_i1	WBGene00013218	Q9XVZ9
ppa_stranded_DN19153_c0_g1_i1	WBGene00006386	G5EF68
ppa_stranded_DN19163_c0_g2_i1	WBGene00020171	A9D0C6
ppa_stranded_DN19168_c0_g1_i1	WBGene00006856	Q17361
ppa_stranded_DN19169_c0_g1_i1	WBGene00004450	P49181
ppa_stranded_DN19171_c0_g1_i1	WBGene00006729	O01883
ppa_stranded_DN19173_c0_g3_i1	WBGene00021021	Q9UA63
ppa_stranded_DN19175_c0_g1_i1	WBGene00004895	G5EEG7
ppa_stranded_DN19185_c0_g1_i2	WBGene00044903	Q0PDK5
ppa_stranded_DN19186_c0_g2_i1	WBGene00001233	Q9XUP3
ppa_stranded_DN19187_c0_g1_i1	WBGene00012964	Q9XXD4
ppa_stranded_DN19206_c0_g1_i1	WBGene00010428	Q9U3C8
ppa_stranded_DN19212_c0_g1_i1	WBGene00003409	Q19048
ppa_stranded_DN19220_c0_g2_i1	WBGene00017664	Q19677
ppa_stranded_DN19226_c0_g1_i1	WBGene00007760	Q18242
ppa_stranded_DN19232_c0_g1_i1	WBGene00001118	G5ECZ4
ppa_stranded_DN19234_c0_g1_i1	WBGene00022577	O01879
ppa_stranded_DN19239_c1_g2_i1	WBGene00022350	Q9BKR5
ppa_stranded_DN19240_c0_g2_i1	WBGene00045400	A5JYT8
ppa_stranded_DN19247_c0_g2_i1	WBGene00017278	Q10054
ppa_stranded_DN19264_c0_g1_i1	WBGene00011190	P92011
ppa_stranded_DN19267_c0_g2_i1	WBGene00013998	G5EG49
ppa_stranded_DN19271_c0_g1_i1	WBGene00011303	Q22004
ppa_stranded_DN19273_c0_g1_i1	WBGene00020018	Q21954
ppa_stranded_DN19286_c0_g1_i1	WBGene00020366	Q22347
ppa_stranded_DN19301_c0_g1_i1	WBGene00007387	Q17765
ppa_stranded_DN19307_c0_g2_i1	WBGene00010962	P24891
ppa_stranded_DN19328_c0_g1_i1	WBGene00015185	P90993
ppa_stranded_DN19351_c0_g2_i1	WBGene00008296	G5ECX9
ppa_stranded_DN19352_c0_g1_i2	WBGene00013765	Q9U2Y2
ppa_stranded_DN19377_c0_g1_i1	WBGene00010197	O62265
ppa_stranded_DN19383_c0_g1_i1	WBGene00010470	G5EDZ7
ppa_stranded_DN19389_c0_g1_i1	WBGene00009319	O45430
ppa_stranded_DN19398_c0_g1_i1	WBGene00010807	O45690
ppa_stranded_DN19399_c0_g1_i1	WBGene00014200	G5EEQ3
ppa_stranded_DN19414_c0_g2_i1	WBGene00016978	Q09287
ppa_stranded_DN19421_c0_g1_i1	WBGene00004059	Q18598
ppa_stranded_DN19428_c1_g1_i1	WBGene00008627	P90820
ppa_stranded_DN19433_c0_g2_i1	WBGene00000738	Q966K5
ppa_stranded_DN19460_c0_g2_i1	WBGene00007304	Q17629
ppa_stranded_DN19471_c0_g1_i1	WBGene00011837	Q7JLH4
ppa_stranded_DN19477_c0_g1_i1	WBGene00016762	O44149
ppa_stranded_DN19506_c0_g2_i1	WBGene00004807	G5ECU1
ppa_stranded_DN19514_c0_g1_i1	WBGene00002025	P50140
ppa_stranded_DN19523_c0_g1_i1	WBGene00006727	P0CG71
ppa_stranded_DN19525_c0_g2_i1	WBGene00020800	A8WFH3
ppa_stranded_DN19527_c0_g2_i1	WBGene00006706	Q95017
ppa_stranded_DN19543_c0_g1_i1	WBGene00009161	O18687
ppa_stranded_DN19557_c0_g1_i1	WBGene00007630	Q09254
ppa_stranded_DN19579_c0_g2_i1	WBGene00000188	O45379
ppa_stranded_DN19599_c0_g1_i1	WBGene00007245	O45236
ppa_stranded_DN19607_c0_g2_i1	WBGene00005904	Q7KPX2
ppa_stranded_DN19626_c0_g1_i1	WBGene00011017	Q8WQD7
ppa_stranded_DN19639_c0_g1_i1	WBGene00001050	Q10660
ppa_stranded_DN19647_c0_g1_i1	WBGene00017429	Q19391
ppa_stranded_DN19659_c0_g1_i1	WBGene00044322	Q9U3J2
ppa_stranded_DN19680_c0_g2_i1	WBGene00012085	D1MN75
ppa_stranded_DN19681_c0_g1_i2	WBGene00008491	Q7YTQ3
ppa_stranded_DN19701_c0_g1_i1	WBGene00010230	P34476
ppa_stranded_DN19705_c0_g1_i1	WBGene00020812	Q22781
ppa_stranded_DN1971_c0_g1_i1	WBGene00022837	Q9N4L2
ppa_stranded_DN19715_c0_g3_i1	WBGene00001788	O45115
ppa_stranded_DN19717_c0_g1_i1	WBGene00003390	Q9BLB6
ppa_stranded_DN19721_c0_g2_i1	WBGene00003829	G5EE74
ppa_stranded_DN19725_c0_g1_i1	WBGene00013739	A0A3B1DV80
ppa_stranded_DN19726_c0_g1_i2	WBGene00013358	Q9U1Z6
ppa_stranded_DN19730_c0_g1_i4	WBGene00001612	P34299
ppa_stranded_DN19734_c0_g1_i1	WBGene00045419	K8ERR8
ppa_stranded_DN19734_c1_g1_i1	WBGene00007029	Q9TYU5
ppa_stranded_DN19742_c0_g1_i2	WBGene00010981	Q21655
ppa_stranded_DN19749_c0_g1_i1	WBGene00006746	P34710
ppa_stranded_DN19758_c0_g1_i1	WBGene00017405	Q9BLC3
ppa_stranded_DN19759_c0_g2_i1	WBGene00012085	D1MN75
ppa_stranded_DN19777_c0_g2_i1	WBGene00001595	Q17339
ppa_stranded_DN19779_c0_g3_i1	WBGene00022843	O76446
ppa_stranded_DN19779_c0_g5_i1	WBGene00018505	Q9TXX5
ppa_stranded_DN19789_c0_g1_i3	WBGene00020139	P91408
ppa_stranded_DN19789_c0_g1_i5	WBGene00020139	P91408
ppa_stranded_DN19790_c0_g1_i1	WBGene00021116	O16638
ppa_stranded_DN19795_c0_g2_i1	WBGene00006393	Q20563
ppa_stranded_DN19799_c0_g1_i1	WBGene00019821	O44499
ppa_stranded_DN19800_c0_g1_i1	WBGene00194642	C8JQQ0
ppa_stranded_DN19803_c0_g1_i1	WBGene00007455	Q9U3Q6
ppa_stranded_DN19820_c0_g1_i2	WBGene00000203	Q9XWV3
ppa_stranded_DN19822_c0_g1_i2	WBGene00006621	Q94176
ppa_stranded_DN19832_c0_g1_i1	WBGene00000142	Q17820
ppa_stranded_DN19835_c0_g1_i1	WBGene00012116	P91835
ppa_stranded_DN19841_c0_g1_i1	WBGene00044346	Q4W5R6
ppa_stranded_DN19850_c0_g1_i1	WBGene00018221	O16266
ppa_stranded_DN19855_c0_g1_i1	WBGene00013802	Q9U2U7
ppa_stranded_DN19882_c0_g1_i1	WBGene00007924	Q09497
ppa_stranded_DN19883_c0_g2_i1	WBGene00018654	Q9N5S5
ppa_stranded_DN19886_c0_g1_i1	WBGene00020802	Q8IFY9
ppa_stranded_DN19890_c0_g1_i1	WBGene00017981	O16299
ppa_stranded_DN19892_c0_g1_i1	WBGene00001337	Q23315
ppa_stranded_DN19899_c0_g1_i1	WBGene00020441	Q22417
ppa_stranded_DN19900_c0_g2_i1	WBGene00021655	Q9TYM6
ppa_stranded_DN19906_c0_g3_i2	WBGene00012863	Q9XWZ0
ppa_stranded_DN19908_c0_g1_i1	WBGene00012497	G5EGB3
ppa_stranded_DN19913_c0_g2_i1	WBGene00011799	Q9XUP8
ppa_stranded_DN19914_c0_g1_i2	WBGene00003738	Q93791
ppa_stranded_DN19916_c0_g1_i1	WBGene00003162	O02640
ppa_stranded_DN19929_c0_g1_i1	WBGene00043057	Q5WRN3
ppa_stranded_DN19929_c1_g1_i1	WBGene00000002	Q19834
ppa_stranded_DN19930_c0_g2_i1	WBGene00012376	Q94360
ppa_stranded_DN19940_c0_g2_i1	WBGene00004101	Q17796
ppa_stranded_DN19941_c0_g1_i1	WBGene00021900	Q9BL64
ppa_stranded_DN19944_c0_g1_i2	WBGene00006950	Q94129
ppa_stranded_DN19945_c0_g1_i1	WBGene00023418	Q6BEV5
ppa_stranded_DN19950_c1_g2_i1	WBGene00001155	P34559
ppa_stranded_DN19952_c0_g1_i2	WBGene00003546	P98061
ppa_stranded_DN19957_c0_g1_i2	WBGene00010579	Q9XUU9
ppa_stranded_DN19959_c0_g1_i1	WBGene00018321	Q9BI89
ppa_stranded_DN19963_c0_g1_i1	WBGene00000122	Q21559
ppa_stranded_DN19966_c0_g1_i1	WBGene00012907	Q9U2F2
ppa_stranded_DN19977_c0_g1_i2	WBGene00008641	Q09535
ppa_stranded_DN19979_c0_g1_i1	WBGene00004083	G5EC18
ppa_stranded_DN20003_c0_g1_i2	WBGene00009996	G5EC45
ppa_stranded_DN20004_c0_g1_i1	WBGene00018187	Q20173
ppa_stranded_DN20007_c0_g1_i1	WBGene00044666	Q2V4S9
ppa_stranded_DN20014_c0_g1_i1	WBGene00044705	Q2L6V8
ppa_stranded_DN20023_c0_g3_i1	WBGene00016158	O01965
ppa_stranded_DN20026_c0_g1_i2	WBGene00043992	Q5CZ52
ppa_stranded_DN20038_c0_g1_i2	WBGene00008851	Q9XVU5
ppa_stranded_DN20067_c0_g1_i1	WBGene00009660	Q20369
ppa_stranded_DN20073_c0_g1_i5	WBGene00004196	O62103
ppa_stranded_DN20088_c0_g1_i1	WBGene00044379	Q4W516
ppa_stranded_DN20096_c0_g1_i1	WBGene00001756	P91254
ppa_stranded_DN20111_c0_g1_i1	WBGene00006324	G5EFD9
ppa_stranded_DN20115_c0_g1_i1	WBGene00008332	P90778
ppa_stranded_DN20116_c0_g1_i1	WBGene00004319	Q23541
ppa_stranded_DN20124_c0_g1_i1	WBGene00021460	Q95XP9
ppa_stranded_DN20131_c0_g2_i1	WBGene00010815	Q7YWW8
ppa_stranded_DN20133_c0_g1_i1	WBGene00003248	Q20930
ppa_stranded_DN20138_c0_g1_i1	WBGene00017161	Q19088
ppa_stranded_DN20148_c0_g1_i1	WBGene00020701	Q22686
ppa_stranded_DN20151_c0_g1_i1	WBGene00007591	Q17996
ppa_stranded_DN20165_c0_g1_i4	WBGene00007226	Q17573
ppa_stranded_DN20167_c0_g2_i2	WBGene00020507	Q22494
ppa_stranded_DN20170_c0_g1_i1	WBGene00000490	P90757
ppa_stranded_DN20178_c0_g1_i1	WBGene00019333	Q21154
ppa_stranded_DN20187_c0_g1_i1	WBGene00003970	Q19192
ppa_stranded_DN20196_c0_g1_i1	WBGene00018184	Q20177
ppa_stranded_DN20198_c0_g2_i1	WBGene00001621	Q21353
ppa_stranded_DN20199_c0_g1_i2	WBGene00004277	Q8MXS1
ppa_stranded_DN20218_c0_g1_i1	WBGene00022794	P34670
ppa_stranded_DN20223_c0_g1_i2	WBGene00010147	Q20879
ppa_stranded_DN20224_c0_g2_i1	WBGene00302968	Q9U1X8
ppa_stranded_DN20226_c0_g2_i1	WBGene00016128	Q18195
ppa_stranded_DN20232_c0_g1_i1	WBGene00015138	Q10938
ppa_stranded_DN20240_c0_g1_i1	WBGene00010670	Q21336
ppa_stranded_DN20243_c0_g3_i1	WBGene00012639	O62425
ppa_stranded_DN20246_c0_g1_i1	WBGene00021980	Q966A3
ppa_stranded_DN20247_c0_g2_i1	WBGene00008956	G5EFM9
ppa_stranded_DN20251_c0_g2_i2	WBGene00006945	G5EDY2
ppa_stranded_DN20253_c0_g1_i3	WBGene00004029	G5ECP4
ppa_stranded_DN20254_c0_g1_i1	WBGene00017880	Q22971
ppa_stranded_DN20254_c0_g3_i1	WBGene00009399	O45447
ppa_stranded_DN20256_c0_g1_i1	WBGene00017736	Q9TXI2
ppa_stranded_DN20263_c0_g1_i1	WBGene00010595	Q19341
ppa_stranded_DN20267_c0_g1_i1	WBGene00008341	Q18878
ppa_stranded_DN20281_c0_g1_i1	WBGene00021959	Q9N336
ppa_stranded_DN20288_c0_g3_i1	WBGene00018342	Q20311
ppa_stranded_DN20291_c0_g1_i2	WBGene00018150	Q20123
ppa_stranded_DN20296_c0_g1_i1	WBGene00000366	P34545
ppa_stranded_DN20310_c0_g1_i5	WBGene00005404	O16397
ppa_stranded_DN20317_c0_g1_i1	WBGene00012811	Q9XWL3
ppa_stranded_DN20323_c0_g1_i2	WBGene00012279	P91575
ppa_stranded_DN20336_c0_g1_i1	WBGene00000798	G5EG59
ppa_stranded_DN20357_c0_g1_i3	WBGene00017743	O17068
ppa_stranded_DN20359_c0_g1_i1	WBGene00003975	Q9U357
ppa_stranded_DN20360_c0_g1_i1	WBGene00005150	Q09273
ppa_stranded_DN20379_c0_g1_i2	WBGene00016210	Q18310
ppa_stranded_DN20404_c0_g2_i1	WBGene00016678	Q09506
ppa_stranded_DN20405_c0_g1_i2	WBGene00002044	Q7Z139
ppa_stranded_DN20410_c0_g2_i1	WBGene00020286	A3QMD6
ppa_stranded_DN20414_c0_g1_i4	WBGene00014039	Q94406
ppa_stranded_DN20415_c0_g2_i1	WBGene00006724	Q09444
ppa_stranded_DN20421_c0_g1_i2	WBGene00014115	G5EFL0
ppa_stranded_DN20438_c0_g1_i1	WBGene00022850	Q23403
ppa_stranded_DN20439_c0_g2_i1	WBGene00007239	Q93173
ppa_stranded_DN20442_c0_g1_i2	WBGene00019806	O61975
ppa_stranded_DN20458_c0_g1_i2	WBGene00021963	E2S7J2
ppa_stranded_DN20474_c0_g1_i2	WBGene00020708	Q9TXN8
ppa_stranded_DN20477_c0_g1_i1	WBGene00017399	X5LVB0
ppa_stranded_DN20481_c0_g2_i2	WBGene00022232	Q95XD0
ppa_stranded_DN20485_c0_g1_i2	WBGene00003008	G5EF76
ppa_stranded_DN20489_c0_g1_i1	WBGene00007819	Q7YX85
ppa_stranded_DN20491_c0_g1_i3	WBGene00009945	Q20681
ppa_stranded_DN20501_c0_g1_i1	WBGene00016587	A3QMB8
ppa_stranded_DN20505_c0_g1_i2	WBGene00016975	Q18895
ppa_stranded_DN20506_c0_g2_i2	WBGene00004268	P91857
ppa_stranded_DN20507_c0_g1_i1	WBGene00001426	Q20107
ppa_stranded_DN20508_c0_g1_i2	WBGene00000116	Q18822
ppa_stranded_DN20512_c0_g1_i2	WBGene00015284	Q17542
ppa_stranded_DN20517_c0_g1_i1	WBGene00019917	O16778
ppa_stranded_DN20529_c0_g1_i1	WBGene00001093	Q8WQC9
ppa_stranded_DN20539_c0_g1_i2	WBGene00022697	P34624
ppa_stranded_DN20544_c0_g1_i3	WBGene00010439	O62291
ppa_stranded_DN20546_c0_g2_i1	WBGene00021392	Q95X11
ppa_stranded_DN20550_c0_g1_i1	WBGene00185067	C0Z3L6
ppa_stranded_DN20561_c0_g1_i1	WBGene00013317	O18246
ppa_stranded_DN20569_c0_g1_i1	WBGene00003934	G5EF37
ppa_stranded_DN20569_c1_g1_i1	WBGene00013956	Q94401
ppa_stranded_DN20574_c0_g1_i1	WBGene00016059	O76385
ppa_stranded_DN20585_c0_g1_i1	WBGene00013458	Q9U1V0
ppa_stranded_DN20590_c0_g1_i1	WBGene00020093	F5GU47
ppa_stranded_DN20611_c0_g1_i2	WBGene00000711	A3QM98
ppa_stranded_DN20614_c0_g1_i1	WBGene00019898	Q21755
ppa_stranded_DN20619_c0_g2_i1	WBGene00001095	P90831
ppa_stranded_DN20621_c0_g2_i1	WBGene00004727	Q2L6W9
ppa_stranded_DN20623_c0_g1_i1	WBGene00000450	G5EE18
ppa_stranded_DN20625_c0_g1_i1	WBGene00020557	P91455
ppa_stranded_DN20631_c0_g1_i1	WBGene00017048	Q1W0S0
ppa_stranded_DN20635_c0_g1_i1	WBGene00018337	Q20317
ppa_stranded_DN20637_c0_g1_i3	WBGene00002976	A0A1N7SYU8
ppa_stranded_DN20643_c0_g1_i1	WBGene00007683	Q18093
ppa_stranded_DN20645_c0_g1_i2	WBGene00017340	Q19297
ppa_stranded_DN20647_c0_g1_i4	WBGene00011914	Q22672
ppa_stranded_DN20653_c0_g1_i1	WBGene00000199	Q9N4I0
ppa_stranded_DN20654_c0_g3_i1	WBGene00008731	Q19377
ppa_stranded_DN20657_c0_g1_i1	WBGene00004283	Q20365
ppa_stranded_DN20673_c0_g1_i1	WBGene00017999	Q7KPW6
ppa_stranded_DN20678_c0_g1_i1	WBGene00010593	Q21253
ppa_stranded_DN20680_c0_g1_i1	WBGene00013018	G5EF86
ppa_stranded_DN20681_c1_g1_i1	WBGene00007731	Q18170
ppa_stranded_DN20684_c0_g1_i1	WBGene00010985	Q21660
ppa_stranded_DN20685_c0_g1_i1	WBGene00003928	Q09583
ppa_stranded_DN20690_c0_g1_i1	WBGene00189995	C4RVF5
ppa_stranded_DN20691_c0_g2_i1	WBGene00013422	G5EF59
ppa_stranded_DN20694_c0_g3_i1	WBGene00006545	Q22292
ppa_stranded_DN20705_c0_g1_i1	WBGene00016442	Q18485
ppa_stranded_DN20709_c0_g3_i1	WBGene00021333	A4UVM2
ppa_stranded_DN20710_c0_g1_i4	WBGene00015622	Q17845
ppa_stranded_DN20717_c0_g2_i1	WBGene00006319	Q17374
ppa_stranded_DN20739_c0_g2_i1	WBGene00013724	Q9U2Z5
ppa_stranded_DN20743_c0_g5_i1	WBGene00009776	Q9BI88
ppa_stranded_DN20754_c0_g1_i1	WBGene00017686	Q09541
ppa_stranded_DN20764_c0_g1_i1	WBGene00013267	Q9U210
ppa_stranded_DN20765_c0_g1_i3	WBGene00001633	O45293
ppa_stranded_DN20766_c0_g1_i1	WBGene00004382	Q86MG7
ppa_stranded_DN20775_c0_g1_i1	WBGene00012085	D1MN75
ppa_stranded_DN20786_c0_g1_i1	WBGene00009006	Q19680
ppa_stranded_DN20794_c0_g1_i1	WBGene00008147	Q18683
ppa_stranded_DN20800_c0_g1_i1	WBGene00020401	Q9TZH9
ppa_stranded_DN20803_c0_g1_i1	WBGene00016393	O44955
ppa_stranded_DN20806_c0_g1_i1	WBGene00021709	H2L0C9
ppa_stranded_DN20807_c0_g2_i1	WBGene00013095	Q9XWJ8
ppa_stranded_DN20810_c1_g1_i1	WBGene00004006	Q19733
ppa_stranded_DN20812_c0_g1_i2	WBGene00015692	P91039
ppa_stranded_DN20813_c0_g1_i1	WBGene00001039	P91454
ppa_stranded_DN20822_c0_g1_i1	WBGene00009305	P91862
ppa_stranded_DN20828_c0_g2_i1	WBGene00016600	I7KSB9
ppa_stranded_DN20834_c0_g1_i2	WBGene00009521	G4RYA5
ppa_stranded_DN20838_c0_g1_i1	WBGene00010714	Q9U3B4
ppa_stranded_DN20844_c0_g1_i2	WBGene00001099	G5ECG7
ppa_stranded_DN20846_c0_g1_i1	WBGene00014244	Q09359
ppa_stranded_DN20852_c0_g1_i1	WBGene00014079	Q23592
ppa_stranded_DN20863_c0_g1_i2	WBGene00012004	Q22752
ppa_stranded_DN20865_c0_g1_i2	WBGene00009774	Q20450
ppa_stranded_DN20866_c0_g1_i1	WBGene00002003	P46555
ppa_stranded_DN20867_c0_g1_i1	WBGene00015914	Q965M5
ppa_stranded_DN20870_c0_g1_i2	WBGene00019828	Q21641
ppa_stranded_DN20880_c0_g1_i2	WBGene00000851	Q03755
ppa_stranded_DN20883_c0_g1_i1	WBGene00012686	Q8MYL9
ppa_stranded_DN20884_c0_g2_i2	WBGene00007237	Q93170
ppa_stranded_DN209_c0_g1_i1	WBGene00017735	Q9TXI3
ppa_stranded_DN20903_c0_g1_i1	WBGene00003836	Q9U757
ppa_stranded_DN20908_c0_g3_i1	WBGene00022379	A7WK41
ppa_stranded_DN20918_c0_g2_i1	WBGene00012727	Q9U2J2
ppa_stranded_DN20922_c0_g1_i1	WBGene00023415	Q6BES0
ppa_stranded_DN20925_c0_g1_i1	WBGene00006721	Q9UAV3
ppa_stranded_DN20929_c0_g1_i2	WBGene00013302	O18230
ppa_stranded_DN20930_c0_g1_i1	WBGene00011831	Q22562
ppa_stranded_DN20937_c0_g1_i2	WBGene00016623	Q10920
ppa_stranded_DN20938_c0_g1_i2	WBGene00002077	Q9N5V3
ppa_stranded_DN20961_c1_g1_i1	WBGene00018370	P34419
ppa_stranded_DN20979_c0_g1_i1	WBGene00015164	Q9TXZ9
ppa_stranded_DN21010_c0_g1_i3	WBGene00012142	Q22856
ppa_stranded_DN21044_c0_g1_i1	WBGene00004438	P48162
ppa_stranded_DN21046_c0_g1_i1	WBGene00044604	G4SNB8
ppa_stranded_DN21051_c0_g1_i1	WBGene00019830	Q21642
ppa_stranded_DN21065_c0_g1_i1	WBGene00001759	Q21945
ppa_stranded_DN21070_c0_g1_i1	WBGene00002243	G5ECX2
ppa_stranded_DN21089_c0_g1_i2	WBGene00000151	Q10002
ppa_stranded_DN21097_c0_g1_i1	WBGene00009848	Q7YX14
ppa_stranded_DN21099_c0_g1_i2	WBGene00018605	Q9GPA1
ppa_stranded_DN21104_c0_g1_i1	WBGene00016376	Q18406
ppa_stranded_DN21105_c0_g1_i1	WBGene00021535	H2L028
ppa_stranded_DN21117_c0_g1_i1	WBGene00013095	Q9XWJ8
ppa_stranded_DN21120_c0_g2_i1	WBGene00008263	C8JQS4
ppa_stranded_DN21121_c0_g1_i1	WBGene00235279	U4PRP0
ppa_stranded_DN21130_c0_g2_i2	WBGene00015286	O17206
ppa_stranded_DN21144_c0_g1_i1	WBGene00013435	Q95PZ7
ppa_stranded_DN21146_c0_g1_i1	WBGene00019904	Q65XY3
ppa_stranded_DN21150_c0_g1_i2	WBGene00020060	O17010
ppa_stranded_DN21160_c0_g2_i1	WBGene00001076	Q20778
ppa_stranded_DN21163_c0_g2_i1	WBGene00018839	P91332
ppa_stranded_DN21165_c0_g1_i2	WBGene00044251	Q564X7
ppa_stranded_DN21166_c0_g1_i1	WBGene00014254	Q09653
ppa_stranded_DN21168_c0_g3_i1	WBGene00006083	O18069
ppa_stranded_DN21170_c0_g1_i1	WBGene00021931	Q9N360
ppa_stranded_DN21171_c0_g1_i1	WBGene00010268	O62274
ppa_stranded_DN21177_c0_g1_i1	WBGene00016629	Q18596
ppa_stranded_DN21179_c0_g1_i1	WBGene00001067	P91285
ppa_stranded_DN21196_c0_g1_i1	WBGene00008368	Q18940
ppa_stranded_DN21209_c0_g1_i1	WBGene00001501	Q9TYS3
ppa_stranded_DN21210_c0_g2_i1	WBGene00010435	Q9NAQ2
ppa_stranded_DN21215_c0_g1_i1	WBGene00018008	O44782
ppa_stranded_DN21230_c0_g1_i1	WBGene00003799	Q9BKT9
ppa_stranded_DN21234_c1_g1_i1	WBGene00021354	Q8IA95
ppa_stranded_DN21237_c0_g1_i1	WBGene00044346	Q4W5R6
ppa_stranded_DN21249_c0_g2_i1	WBGene00007261	Q93177
ppa_stranded_DN21258_c0_g1_i1	WBGene00012912	Q9U2E7
ppa_stranded_DN21266_c0_g1_i2	WBGene00001486	Q9TY03
ppa_stranded_DN21271_c0_g2_i1	WBGene00010597	Q8MQ10
ppa_stranded_DN21280_c0_g2_i1	WBGene00009944	Q20680
ppa_stranded_DN21281_c0_g1_i1	WBGene00018760	P91316
ppa_stranded_DN21284_c0_g1_i3	WBGene00021847	H2KZK9
ppa_stranded_DN21288_c0_g2_i1	WBGene00021934	Q9N358
ppa_stranded_DN21298_c1_g1_i1	WBGene00019763	O16374
ppa_stranded_DN21319_c0_g1_i2	WBGene00022643	O61865
ppa_stranded_DN21327_c0_g1_i1	WBGene00000857	P34888
ppa_stranded_DN21373_c0_g1_i1	WBGene00003018	Q10574
ppa_stranded_DN21378_c0_g3_i1	WBGene00007878	Q93319
ppa_stranded_DN21395_c0_g1_i1	WBGene00001540	Q23310
ppa_stranded_DN21409_c0_g1_i2	WBGene00000970	Q09979
ppa_stranded_DN21415_c0_g2_i1	WBGene00012255	Q23162
ppa_stranded_DN21419_c0_g1_i1	WBGene00021319	A7DT33
ppa_stranded_DN21445_c0_g1_i1	WBGene00219436	I2HAB0
ppa_stranded_DN21453_c0_g2_i1	WBGene00006698	Q9U2U0
ppa_stranded_DN21472_c0_g1_i1	WBGene00018656	Q9N5S7
ppa_stranded_DN21484_c0_g1_i1	WBGene00008343	Q18875
ppa_stranded_DN21487_c1_g1_i1	WBGene00004006	Q19733
ppa_stranded_DN21492_c0_g1_i1	WBGene00020859	Q9TZM5
ppa_stranded_DN21493_c1_g2_i1	WBGene00010237	Q20972
ppa_stranded_DN21501_c0_g2_i1	WBGene00004026	Q9XUP0
ppa_stranded_DN21513_c0_g1_i1	WBGene00012652	Q9XX15
ppa_stranded_DN21519_c0_g1_i1	WBGene00010879	Q21525
ppa_stranded_DN21529_c0_g2_i1	WBGene00003950	P91477
ppa_stranded_DN21543_c0_g1_i1	WBGene00004404	Q9N3E5
ppa_stranded_DN21550_c0_g1_i2	WBGene00020460	Q95QB3
ppa_stranded_DN21582_c0_g1_i1	WBGene00011743	Q94045
ppa_stranded_DN21591_c0_g1_i1	WBGene00016097	Q18157
ppa_stranded_DN21609_c0_g1_i1	WBGene00016059	O76385
ppa_stranded_DN21609_c0_g3_i2	WBGene00016059	O76385
ppa_stranded_DN21628_c0_g2_i1	WBGene00017238	P90815
ppa_stranded_DN21637_c0_g1_i2	WBGene00012209	Q9XVG8
ppa_stranded_DN21638_c0_g2_i1	WBGene00004133	Q20936
ppa_stranded_DN21648_c0_g1_i2	WBGene00002029	O17645
ppa_stranded_DN21654_c0_g1_i1	WBGene00020861	Q23056
ppa_stranded_DN21660_c0_g1_i1	WBGene00003563	P36608
ppa_stranded_DN21662_c0_g1_i2	WBGene00010767	O45685
ppa_stranded_DN21672_c0_g1_i1	WBGene00011038	Q21763
ppa_stranded_DN21676_c0_g2_i2	WBGene00001442	O17593
ppa_stranded_DN21680_c0_g1_i1	WBGene00000262	Q20741
ppa_stranded_DN21683_c0_g1_i1	WBGene00004219	Q95YD0
ppa_stranded_DN21689_c0_g2_i2	WBGene00008303	Q18829
ppa_stranded_DN21694_c0_g1_i2	WBGene00015781	Q17993
ppa_stranded_DN21695_c0_g1_i2	WBGene00001440	H2KZ39
ppa_stranded_DN21700_c0_g1_i2	WBGene00022077	Q95XH1
ppa_stranded_DN21705_c0_g1_i2	WBGene00019126	O01902
ppa_stranded_DN21711_c0_g1_i1	WBGene00006836	Q18685
ppa_stranded_DN21714_c0_g2_i2	WBGene00011368	Q22093
ppa_stranded_DN21719_c0_g1_i1	WBGene00009993	Q20720
ppa_stranded_DN21720_c0_g1_i1	WBGene00014209	Q23389
ppa_stranded_DN21727_c0_g2_i1	WBGene00008667	Q6A1T5
ppa_stranded_DN21728_c0_g1_i1	WBGene00016838	P91177
ppa_stranded_DN21735_c0_g1_i2	WBGene00016167	Q18258
ppa_stranded_DN21737_c0_g2_i2	WBGene00007859	Q09261
ppa_stranded_DN21740_c0_g1_i2	WBGene00010698	Q9XU83
ppa_stranded_DN21748_c0_g2_i1	WBGene00001645	O17560
ppa_stranded_DN21751_c0_g1_i1	WBGene00021646	Q9BL81
ppa_stranded_DN21753_c0_g2_i2	WBGene00021022	Q9UA62
ppa_stranded_DN21756_c0_g1_i1	WBGene00004256	Q1ENI8
ppa_stranded_DN21760_c0_g2_i2	WBGene00010625	Q21274
ppa_stranded_DN21764_c0_g2_i2	WBGene00016344	Q22908
ppa_stranded_DN21768_c0_g1_i1	WBGene00013024	G5EC25
ppa_stranded_DN21773_c0_g1_i1	WBGene00010940	Q6BES2
ppa_stranded_DN21777_c0_g1_i1	WBGene00020172	Q9N5E3
ppa_stranded_DN21782_c0_g1_i1	WBGene00000382	P91155
ppa_stranded_DN21801_c0_g1_i1	WBGene00006757	P34815
ppa_stranded_DN21804_c0_g1_i1	WBGene00003967	Q9XUS3
ppa_stranded_DN21809_c0_g1_i1	WBGene00003175	P91910
ppa_stranded_DN21811_c0_g1_i1	WBGene00013690	Q9NF11
ppa_stranded_DN21827_c0_g2_i1	WBGene00009172	A0A3P6MY96
ppa_stranded_DN21830_c0_g1_i1	WBGene00006571	G5EDN3
ppa_stranded_DN21836_c0_g1_i1	WBGene00000940	G5EFS4
ppa_stranded_DN21839_c0_g1_i1	WBGene00022612	Q23327
ppa_stranded_DN21840_c0_g1_i1	WBGene00018385	Q9U5C2
ppa_stranded_DN21844_c0_g1_i1	WBGene00001744	Q10039
ppa_stranded_DN21846_c0_g1_i1	WBGene00014218	P34600
ppa_stranded_DN21848_c0_g1_i1	WBGene00016992	A9D699
ppa_stranded_DN21850_c0_g1_i1	WBGene00022885	Q7JPD8
ppa_stranded_DN21860_c0_g1_i2	WBGene00010593	Q21253
ppa_stranded_DN21861_c0_g1_i1	WBGene00018274	Q27GU4
ppa_stranded_DN21869_c0_g1_i1	WBGene00018016	Q19988
ppa_stranded_DN21875_c0_g1_i2	WBGene00007555	Q17949
ppa_stranded_DN21886_c0_g1_i2	WBGene00007495	Q17875
ppa_stranded_DN21890_c0_g2_i1	WBGene00002070	G5EDE8
ppa_stranded_DN21891_c0_g1_i2	WBGene00013677	G5ED95
ppa_stranded_DN21893_c0_g1_i1	WBGene00007668	G5EEW1
ppa_stranded_DN21895_c0_g1_i3	WBGene00010283	Q9XVL8
ppa_stranded_DN21900_c0_g1_i1	WBGene00018269	Q20264
ppa_stranded_DN21901_c0_g1_i1	WBGene00015298	Q17556
ppa_stranded_DN21907_c0_g1_i1	WBGene00008073	Q9XUG6
ppa_stranded_DN21909_c0_g1_i1	WBGene00022851	Q23402
ppa_stranded_DN21912_c0_g2_i1	WBGene00010062	Q93789
ppa_stranded_DN21913_c1_g1_i1	WBGene00004473	Q9N3X2
ppa_stranded_DN21917_c0_g1_i1	WBGene00003156	Q95XQ8
ppa_stranded_DN21928_c0_g1_i2	WBGene00011559	G5EDZ2
ppa_stranded_DN21932_c0_g1_i1	WBGene00014227	Q09644
ppa_stranded_DN21933_c0_g1_i1	WBGene00010436	Q95QD6
ppa_stranded_DN21934_c0_g2_i2	WBGene00009945	Q20681
ppa_stranded_DN21942_c0_g1_i1	WBGene00021931	Q9N360
ppa_stranded_DN21943_c0_g1_i1	WBGene00019005	O44734
ppa_stranded_DN21945_c0_g1_i1	WBGene00009940	O17883
ppa_stranded_DN21952_c0_g2_i1	WBGene00018655	Q9N5S6
ppa_stranded_DN21958_c0_g1_i2	WBGene00009891	Q20609
ppa_stranded_DN21960_c0_g1_i1	WBGene00015929	O45085
ppa_stranded_DN21968_c0_g1_i1	WBGene00010757	G1K0W1
ppa_stranded_DN21978_c0_g1_i1	WBGene00018073	G5ECZ3
ppa_stranded_DN21981_c0_g1_i2	WBGene00011571	Q22285
ppa_stranded_DN21986_c0_g1_i2	WBGene00002244	D0PV95
ppa_stranded_DN21993_c0_g1_i1	WBGene00013439	Q9BI47
ppa_stranded_DN21994_c0_g1_i1	WBGene00008647	P90832
ppa_stranded_DN21997_c0_g1_i1	WBGene00009626	Q09321
ppa_stranded_DN22002_c0_g2_i1	WBGene00018023	O17186
ppa_stranded_DN22003_c0_g2_i1	WBGene00001540	Q23310
ppa_stranded_DN22004_c0_g1_i1	WBGene00004759	G5EFG0
ppa_stranded_DN22005_c0_g1_i1	WBGene00014074	P34680
ppa_stranded_DN22006_c0_g1_i1	WBGene00000652	Q21528
ppa_stranded_DN22007_c0_g1_i1	WBGene00000936	G5EEL5
ppa_stranded_DN22041_c0_g1_i1	WBGene00000536	P48376
ppa_stranded_DN22043_c0_g1_i1	WBGene00011079	Q09421
ppa_stranded_DN22058_c0_g1_i1	WBGene00004909	O45915
ppa_stranded_DN22061_c0_g1_i1	WBGene00013891	Q23313
ppa_stranded_DN22076_c0_g1_i3	WBGene00006940	O18209
ppa_stranded_DN22095_c0_g1_i1	WBGene00009727	Q20437
ppa_stranded_DN22101_c0_g2_i1	WBGene00004340	P53016
ppa_stranded_DN22183_c0_g1_i2	WBGene00016964	Q95QQ2
ppa_stranded_DN2221_c0_g2_i1	WBGene00004931	P31161
ppa_stranded_DN2236_c0_g1_i1	WBGene00016147	Q27472
ppa_stranded_DN22365_c0_g1_i1	WBGene00018370	P34419
ppa_stranded_DN22412_c0_g1_i1	WBGene00007130	P41942
ppa_stranded_DN22459_c0_g2_i1	WBGene00010773	Q21428
ppa_stranded_DN22480_c0_g1_i1	WBGene00003615	Q27521
ppa_stranded_DN22492_c0_g1_i1	WBGene00000487	O61827
ppa_stranded_DN22492_c1_g1_i1	WBGene00022295	Q9N4C1
ppa_stranded_DN22493_c0_g2_i1	WBGene00017666	O16585
ppa_stranded_DN22647_c0_g1_i3	WBGene00017971	Q95QH4
ppa_stranded_DN22647_c0_g1_i5	WBGene00017131	Q95QN9
ppa_stranded_DN22684_c0_g1_i2	WBGene00010274	Q21009
ppa_stranded_DN22711_c1_g1_i2	WBGene00009904	Q7YX09
ppa_stranded_DN22720_c0_g2_i1	WBGene00000812	G5ECJ6
ppa_stranded_DN22804_c0_g1_i2	WBGene00011868	P34577
ppa_stranded_DN22854_c0_g2_i1	WBGene00011682	Q22372
ppa_stranded_DN22900_c0_g1_i1	WBGene00003096	O16202
ppa_stranded_DN22964_c0_g1_i1	WBGene00001618	A0A1T5HUM0
ppa_stranded_DN22969_c0_g1_i1	WBGene00016541	Q18553
ppa_stranded_DN22978_c0_g1_i1	WBGene00007987	Q18503
ppa_stranded_DN22978_c1_g1_i2	WBGene00021882	Q95XX1
ppa_stranded_DN22979_c1_g2_i2	WBGene00000976	O16619
ppa_stranded_DN22988_c0_g1_i1	WBGene00000884	P52016
ppa_stranded_DN22989_c0_g1_i1	WBGene00008643	Q7YX41
ppa_stranded_DN22995_c0_g1_i1	WBGene00000408	G5EFV5
ppa_stranded_DN23007_c0_g1_i1	WBGene00006708	Q95XX0
ppa_stranded_DN2301_c0_g1_i1	WBGene00009109	Q19777
ppa_stranded_DN23011_c0_g1_i4	WBGene00000120	Q17561
ppa_stranded_DN23014_c0_g1_i1	WBGene00017447	Q3HKC5
ppa_stranded_DN23019_c0_g1_i1	WBGene00018111	O16622
ppa_stranded_DN23027_c0_g1_i1	WBGene00020471	O17373
ppa_stranded_DN23029_c0_g2_i1	WBGene00010522	Q9XVU7
ppa_stranded_DN23035_c0_g1_i1	WBGene00019492	Q21284
ppa_stranded_DN23046_c0_g5_i1	WBGene00013011	G5EF63
ppa_stranded_DN23048_c0_g1_i1	WBGene00000523	Q11085
ppa_stranded_DN23055_c0_g1_i2	WBGene00014158	G5ECL6
ppa_stranded_DN23059_c0_g1_i1	WBGene00011637	P45969
ppa_stranded_DN23062_c0_g1_i1	WBGene00000889	Q9U2S6
ppa_stranded_DN23063_c0_g1_i3	WBGene00013734	Q9BHL4
ppa_stranded_DN23068_c0_g1_i3	WBGene00015158	Q10948
ppa_stranded_DN23070_c0_g2_i1	WBGene00002139	O61788
ppa_stranded_DN23081_c0_g1_i1	WBGene00016131	Q18202
ppa_stranded_DN23086_c0_g2_i1	WBGene00021437	Q9N517
ppa_stranded_DN23107_c0_g2_i4	WBGene00019917	O16778
ppa_stranded_DN23113_c0_g1_i1	WBGene00013217	Q9XW00
ppa_stranded_DN23114_c0_g1_i3	WBGene00020551	Q22539
ppa_stranded_DN23126_c0_g1_i1	WBGene00003059	Q8IG68
ppa_stranded_DN23131_c0_g1_i1	WBGene00010593	Q21253
ppa_stranded_DN23132_c0_g1_i1	WBGene00008655	Q19310
ppa_stranded_DN23133_c0_g2_i1	WBGene00021502	O76726
ppa_stranded_DN23135_c0_g2_i1	WBGene00001333	G5EBK3
ppa_stranded_DN23145_c0_g1_i1	WBGene00014249	G5EC87
ppa_stranded_DN23146_c0_g1_i2	WBGene00235340	U4PBZ2
ppa_stranded_DN23147_c0_g1_i1	WBGene00011681	Q22371
ppa_stranded_DN23155_c0_g1_i1	WBGene00003412	Q19625
ppa_stranded_DN23160_c0_g1_i1	WBGene00006655	Q09306
ppa_stranded_DN23164_c0_g3_i1	WBGene00009375	C6KRH4
ppa_stranded_DN23165_c0_g2_i1	WBGene00044464	Q3V5K2
ppa_stranded_DN23169_c0_g2_i1	WBGene00021562	Q9N4Y8
ppa_stranded_DN23170_c0_g1_i1	WBGene00017535	O16213
ppa_stranded_DN23172_c0_g1_i1	WBGene00008891	Q9XV91
ppa_stranded_DN23178_c0_g2_i1	WBGene00269434	A0A168H2N7
ppa_stranded_DN2319_c0_g1_i1	WBGene00011206	Q21907
ppa_stranded_DN23190_c0_g1_i1	WBGene00001033	Q21324
ppa_stranded_DN23193_c0_g1_i1	WBGene00020461	H2L0L4
ppa_stranded_DN23199_c0_g2_i1	WBGene00001475	G5EDK5
ppa_stranded_DN23208_c0_g1_i3	WBGene00011044	G5EDL4
ppa_stranded_DN23211_c0_g1_i1	WBGene00016103	Q18164
ppa_stranded_DN23217_c0_g1_i1	WBGene00001037	O16303
ppa_stranded_DN23217_c0_g1_i3	WBGene00003078	Q19952
ppa_stranded_DN23218_c1_g1_i1	WBGene00000407	G5ECH7
ppa_stranded_DN23219_c0_g1_i1	WBGene00001058	Q9TYX1
ppa_stranded_DN23221_c0_g1_i2	WBGene00011767	Q94055
ppa_stranded_DN23230_c0_g1_i2	WBGene00016200	Q09477
ppa_stranded_DN23236_c0_g3_i1	WBGene00018890	P91340
ppa_stranded_DN23239_c0_g2_i1	WBGene00003729	G5EDH8
ppa_stranded_DN23246_c0_g1_i1	WBGene00011451	Q22178
ppa_stranded_DN23251_c0_g1_i1	WBGene00015333	P34272
ppa_stranded_DN23255_c0_g1_i3	WBGene00011802	Q9U367
ppa_stranded_DN23256_c0_g1_i1	WBGene00015497	Q65CM0
ppa_stranded_DN23257_c1_g1_i1	WBGene00001137	P90735
ppa_stranded_DN23261_c0_g1_i1	WBGene00008408	O17731
ppa_stranded_DN23265_c0_g2_i1	WBGene00004096	G5EFY7
ppa_stranded_DN23266_c0_g3_i2	WBGene00013880	Q23295
ppa_stranded_DN23268_c0_g1_i2	WBGene00019401	Q21233
ppa_stranded_DN23279_c0_g2_i1	WBGene00011058	O62336
ppa_stranded_DN23280_c0_g1_i1	WBGene00019917	O16778
ppa_stranded_DN23287_c0_g1_i1	WBGene00001483	G5EDX7
ppa_stranded_DN23291_c0_g1_i1	WBGene00009745	Q95ZT5
ppa_stranded_DN23292_c0_g2_i1	WBGene00007999	G5EFR0
ppa_stranded_DN23301_c0_g1_i1	WBGene00017515	Q94187
ppa_stranded_DN23304_c0_g1_i2	WBGene00017126	Q19059
ppa_stranded_DN23306_c0_g1_i2	WBGene00013650	Q9NAM7
ppa_stranded_DN23310_c0_g1_i2	WBGene00013737	O77081
ppa_stranded_DN23311_c0_g1_i1	WBGene00020489	Q966F7
ppa_stranded_DN23315_c0_g1_i1	WBGene00017342	Q7JP67
ppa_stranded_DN23319_c0_g1_i1	WBGene00007705	O17594
ppa_stranded_DN23320_c0_g1_i2	WBGene00008624	Q19267
ppa_stranded_DN23323_c0_g1_i2	WBGene00020279	A0A0K3AV45
ppa_stranded_DN23333_c0_g1_i2	WBGene00009272	Q93654
ppa_stranded_DN23333_c0_g2_i1	WBGene00019673	O44995
ppa_stranded_DN23336_c0_g1_i2	WBGene00012393	Q9U1T1
ppa_stranded_DN23337_c0_g2_i2	WBGene00001169	P53013
ppa_stranded_DN23339_c1_g1_i1	WBGene00001057	Q19086
ppa_stranded_DN23346_c0_g1_i5	WBGene00006540	P34475
ppa_stranded_DN23347_c0_g1_i1	WBGene00019808	Q8MXG1
ppa_stranded_DN23348_c0_g1_i2	WBGene00012182	Q9XU63
ppa_stranded_DN23349_c0_g1_i1	WBGene00018861	Q95Q52
ppa_stranded_DN23350_c0_g1_i2	WBGene00010725	Q93878
ppa_stranded_DN23357_c0_g1_i1	WBGene00016468	Q966Q0
ppa_stranded_DN23369_c0_g1_i1	WBGene00021985	Q9TZC7
ppa_stranded_DN23387_c0_g1_i2	WBGene00022742	Q23494
ppa_stranded_DN23395_c0_g1_i3	WBGene00021057	Q23195
ppa_stranded_DN23398_c0_g1_i2	WBGene00004201	P34453
ppa_stranded_DN23402_c0_g1_i3	WBGene00018383	Q9U5B9
ppa_stranded_DN23407_c0_g1_i1	WBGene00015049	Q17448
ppa_stranded_DN23410_c0_g1_i2	WBGene00006829	P35602
ppa_stranded_DN23411_c0_g1_i1	WBGene00003804	O45933
ppa_stranded_DN23412_c0_g1_i2	WBGene00007171	Q17495
ppa_stranded_DN23423_c0_g1_i2	WBGene00020511	Q22505
ppa_stranded_DN23424_c0_g1_i1	WBGene00001231	O01974
ppa_stranded_DN23435_c0_g1_i1	WBGene00021752	Q9N3L2
ppa_stranded_DN23437_c0_g1_i1	WBGene00021750	Q8IAA1
ppa_stranded_DN23438_c0_g1_i3	WBGene00020842	P91500
ppa_stranded_DN2344_c0_g1_i1	WBGene00019759	Q23015
ppa_stranded_DN23442_c0_g1_i1	WBGene00007464	P52887
ppa_stranded_DN23454_c0_g2_i1	WBGene00011408	Q22135
ppa_stranded_DN23455_c1_g1_i1	WBGene00011768	Q94056
ppa_stranded_DN23460_c0_g1_i2	WBGene00001089	A0A0K3AS68
ppa_stranded_DN23466_c0_g2_i2	WBGene00018721	G5EFY1
ppa_stranded_DN23477_c0_g2_i2	WBGene00002069	G5EFS1
ppa_stranded_DN23480_c0_g1_i1	WBGene00006572	Q17754
ppa_stranded_DN23480_c0_g3_i1	WBGene00006572	Q17754
ppa_stranded_DN23482_c0_g1_i1	WBGene00009962	Q9XVN0
ppa_stranded_DN23487_c0_g1_i1	WBGene00010624	Q9NAP9
ppa_stranded_DN23487_c1_g1_i1	WBGene00009945	Q20681
ppa_stranded_DN23492_c1_g1_i1	WBGene00004023	Q22525
ppa_stranded_DN23495_c0_g1_i1	WBGene00015525	P34305
ppa_stranded_DN23497_c0_g1_i3	WBGene00018613	Q09397
ppa_stranded_DN23499_c0_g1_i1	WBGene00018007	O44781
ppa_stranded_DN23500_c0_g1_i1	WBGene00021629	Q9N4V4
ppa_stranded_DN23501_c0_g1_i2	WBGene00021544	Q9N3X3
ppa_stranded_DN23502_c0_g2_i2	WBGene00004062	H2L034
ppa_stranded_DN23503_c0_g2_i1	WBGene00010716	Q21389
ppa_stranded_DN23506_c0_g1_i1	WBGene00014096	Q23624
ppa_stranded_DN23509_c0_g2_i2	WBGene00022052	Q9BKQ6
ppa_stranded_DN23521_c0_g1_i1	WBGene00017179	O16574
ppa_stranded_DN23531_c0_g1_i1	WBGene00016260	Q95YE2
ppa_stranded_DN23537_c0_g1_i2	WBGene00010403	G5EDX5
ppa_stranded_DN23540_c0_g1_i1	WBGene00012890	O62481
ppa_stranded_DN23545_c0_g2_i1	WBGene00012383	Q9XWL1
ppa_stranded_DN23546_c0_g1_i1	WBGene00010610	P90910
ppa_stranded_DN23556_c0_g1_i3	WBGene00012230	G5EG14
ppa_stranded_DN23559_c0_g1_i1	WBGene00015811	Q18035
ppa_stranded_DN23565_c0_g1_i2	WBGene00015305	Q17565
ppa_stranded_DN23568_c0_g2_i1	WBGene00022107	Q9N4H1
ppa_stranded_DN23574_c0_g1_i1	WBGene00011953	P49596
ppa_stranded_DN23583_c0_g2_i1	WBGene00020397	Q9TZH6
ppa_stranded_DN23590_c0_g1_i1	WBGene00016059	O76385
ppa_stranded_DN23592_c0_g1_i1	WBGene00000603	P18834
ppa_stranded_DN23595_c0_g2_i1	WBGene00018317	Q20298
ppa_stranded_DN23596_c0_g1_i2	WBGene00003634	Q22555
ppa_stranded_DN23608_c0_g1_i1	WBGene00022256	Q8MXQ8
ppa_stranded_DN23608_c1_g2_i1	WBGene00022040	Q9N2Z4
ppa_stranded_DN23608_c2_g1_i1	WBGene00012201	Q23119
ppa_stranded_DN23614_c0_g1_i1	WBGene00000653	Q21562
ppa_stranded_DN23615_c0_g1_i3	WBGene00000188	O45379
ppa_stranded_DN23617_c0_g1_i1	WBGene00008604	Q7YX44
ppa_stranded_DN23620_c0_g1_i1	WBGene00015934	O45080
ppa_stranded_DN23634_c0_g1_i2	WBGene00021536	Q9N3Y1
ppa_stranded_DN23640_c0_g1_i1	WBGene00011561	Q22288
ppa_stranded_DN23649_c0_g1_i1	WBGene00000155	O44750
ppa_stranded_DN23656_c0_g2_i4	WBGene00004088	Q9BL73
ppa_stranded_DN23663_c0_g1_i2	WBGene00008228	Q7YX43
ppa_stranded_DN23669_c0_g1_i2	WBGene00003033	G5EDU6
ppa_stranded_DN23673_c0_g1_i1	WBGene00013161	Q9NAA4
ppa_stranded_DN23678_c0_g2_i2	WBGene00008939	Q19577
ppa_stranded_DN23680_c0_g1_i1	WBGene00000392	Q20628
ppa_stranded_DN23686_c0_g3_i1	WBGene00001714	Q9N3V3
ppa_stranded_DN23686_c1_g1_i1	WBGene00001722	O16295
ppa_stranded_DN23687_c0_g1_i2	WBGene00015820	O76585
ppa_stranded_DN23689_c0_g2_i1	WBGene00010875	G5ECL1
ppa_stranded_DN23690_c0_g1_i1	WBGene00019241	Q9N5L0
ppa_stranded_DN23691_c0_g1_i1	WBGene00021931	Q9N360
ppa_stranded_DN23692_c0_g1_i5	WBGene00015186	P90992
ppa_stranded_DN23698_c0_g1_i1	WBGene00003396	Q9XTC6
ppa_stranded_DN23702_c0_g1_i1	WBGene00011261	G5ECP0
ppa_stranded_DN23711_c0_g2_i2	WBGene00003590	Q27473
ppa_stranded_DN23714_c0_g1_i1	WBGene00011679	Q22370
ppa_stranded_DN23715_c0_g1_i6	WBGene00022087	Q95XI7
ppa_stranded_DN23718_c0_g2_i1	WBGene00018859	Q94242
ppa_stranded_DN23719_c0_g1_i1	WBGene00000796	G5EBX6
[truncated: 12,167 more rows]
