# Supplementary material for: Single worm transcriptomics identifies a developmental core network of oscillating genes with deep conservation across nematodes
Source: HighWire-hosted journal article supplement (doi:10.1101/gr.275303.121), 2021-07-22
Supplement: Supplemental_Table_S10.xlsx [file Supplemental_Table_S10.xlsx]

## Sheet: tb_ls3155_ElPcoV3_trinP3
Supplemental Table S10 The 3,155 regional expression genes in this study
Gene_ID_Trinity2017	Gene_ID_El.Paco_V3	region
ppa_stranded_DN31454_c7_g3_i3	Iso_D.12702.1	P1
ppa_stranded_DN29580_c0_g1_i1	Iso_D.7200.1	P1
ppa_stranded_DN10099_c0_g2_i1	ppa_stranded_DN10099_c0_g2_i1	P1
ppa_stranded_DN11342_c0_g1_i1	ppa_stranded_DN11342_c0_g1_i1	P1
ppa_stranded_DN13490_c0_g1_i1	ppa_stranded_DN13490_c0_g1_i1	P1
ppa_stranded_DN15218_c0_g1_i1	ppa_stranded_DN15218_c0_g1_i1	P1
ppa_stranded_DN15378_c0_g1_i1	ppa_stranded_DN15378_c0_g1_i2	P1
ppa_stranded_DN16567_c0_g1_i2	ppa_stranded_DN16567_c0_g1_i2	P1
ppa_stranded_DN19599_c0_g1_i1	ppa_stranded_DN19599_c0_g1_i1	P1
ppa_stranded_DN25122_c0_g1_i2	ppa_stranded_DN25122_c0_g1_i2	P1
ppa_stranded_DN25721_c0_g1_i4	ppa_stranded_DN25721_c0_g1_i2	P1
ppa_stranded_DN25931_c0_g1_i1	ppa_stranded_DN25931_c0_g1_i1	P1
ppa_stranded_DN2736_c0_g1_i1	ppa_stranded_DN2736_c0_g1_i1	P1
ppa_stranded_DN27915_c1_g2_i2	ppa_stranded_DN27915_c1_g2_i2	P1
ppa_stranded_DN28675_c0_g1_i2	ppa_stranded_DN28675_c0_g1_i2	P1
ppa_stranded_DN29247_c0_g1_i1	ppa_stranded_DN29247_c0_g1_i1	P1
ppa_stranded_DN30400_c0_g1_i6	ppa_stranded_DN30400_c0_g1_i5	P1
ppa_stranded_DN30433_c0_g5_i2	ppa_stranded_DN30433_c0_g5_i2	P1
ppa_stranded_DN30567_c0_g1_i1	ppa_stranded_DN30567_c0_g1_i1	P1
ppa_stranded_DN30907_c3_g3_i5	ppa_stranded_DN30907_c3_g3_i1	P1
ppa_stranded_DN31405_c2_g1_i1	ppa_stranded_DN31405_c2_g1_i1	P1
ppa_stranded_DN32614_c0_g1_i1	ppa_stranded_DN32614_c0_g1_i1	P1
ppa_stranded_DN40041_c0_g1_i1	ppa_stranded_DN40041_c0_g1_i1	P1
ppa_stranded_DN4443_c0_g1_i1	ppa_stranded_DN4443_c0_g1_i1	P1
ppa_stranded_DN44435_c0_g1_i1	ppa_stranded_DN44435_c0_g1_i1	P1
ppa_stranded_DN5645_c0_g1_i1	ppa_stranded_DN5645_c0_g1_i1	P1
ppa_stranded_DN6908_c0_g1_i1	ppa_stranded_DN6908_c0_g1_i1	P1
ppa_stranded_DN23941_c1_g2_i1	PPA00658	P1
ppa_stranded_DN18961_c0_g2_i1	PPA02069	P1
ppa_stranded_DN25558_c0_g1_i3	PPA03244	P1
ppa_stranded_DN2477_c0_g1_i1	PPA07286	P1
ppa_stranded_DN30907_c2_g2_i1	PPA09119	P1
ppa_stranded_DN29606_c1_g3_i1	PPA09627	P1
ppa_stranded_DN30650_c0_g3_i1	PPA10097	P1
ppa_stranded_DN27266_c0_g2_i2	PPA11043	P1
ppa_stranded_DN18151_c0_g2_i1	PPA14126	P1
ppa_stranded_DN27411_c0_g1_i4	PPA14135	P1
ppa_stranded_DN16051_c0_g1_i1	PPA15306	P1
ppa_stranded_DN18332_c0_g1_i1	PPA15352	P1
ppa_stranded_DN27001_c2_g1_i1	PPA17761	P1
ppa_stranded_DN25201_c0_g1_i3	PPA18074	P1
ppa_stranded_DN48732_c0_g1_i1	PPA18376	P1
ppa_stranded_DN27007_c0_g1_i2	PPA22761	P1
ppa_stranded_DN23536_c0_g3_i1	PPA23511	P1
ppa_stranded_DN28690_c0_g1_i3	PPA24385	P1
ppa_stranded_DN17500_c0_g2_i1	PPA24935	P1
ppa_stranded_DN31903_c0_g1_i1	PPA28209	P1
ppa_stranded_DN31454_c6_g2_i1	PPA28211	P1
ppa_stranded_DN28946_c0_g1_i5	PPA28727	P1
ppa_stranded_DN18161_c0_g2_i1	PPA31550	P1
ppa_stranded_DN24646_c0_g1_i1	PPA31917	P1
ppa_stranded_DN31660_c0_g3_i7	PPA34474	P1
ppa_stranded_DN15804_c0_g1_i1	PPA35712	P1
ppa_stranded_DN39724_c0_g1_i1	PPA38716	P1
ppa_stranded_DN29606_c3_g1_i1	PPA39467	P1
ppa_stranded_DN23641_c0_g1_i3	PPA42174	P1
ppa_stranded_DN28183_c0_g1_i4	PPA45368	P1
ppa_stranded_DN22941_c0_g1_i1	UMM-S2878-0.73-mRNA-1_f1	P1
ppa_stranded_DN18936_c2_g1_i1	NA	P1
ppa_stranded_DN30811_c3_g4_i2	Contig5-snapTAU.276	P10
ppa_stranded_DN23941_c0_g1_i1	Iso_D.4095.1	P10
ppa_stranded_DN1039_c0_g1_i1	ppa_stranded_DN1039_c0_g1_i1	P10
ppa_stranded_DN15811_c0_g1_i1	ppa_stranded_DN15811_c0_g1_i1	P10
ppa_stranded_DN24524_c0_g1_i2	ppa_stranded_DN24524_c0_g1_i1	P10
ppa_stranded_DN24834_c0_g2_i1	ppa_stranded_DN24834_c0_g2_i3	P10
ppa_stranded_DN25120_c0_g1_i1	ppa_stranded_DN25120_c0_g1_i1	P10
ppa_stranded_DN25940_c0_g1_i1	ppa_stranded_DN25940_c0_g1_i1	P10
ppa_stranded_DN28925_c0_g1_i1	ppa_stranded_DN28925_c0_g1_i2	P10
ppa_stranded_DN28925_c1_g1_i1	ppa_stranded_DN28925_c1_g1_i1	P10
ppa_stranded_DN29315_c0_g1_i1	ppa_stranded_DN29315_c0_g1_i4	P10
ppa_stranded_DN29770_c0_g1_i2	ppa_stranded_DN29770_c0_g1_i2	P10
ppa_stranded_DN30092_c0_g3_i2	ppa_stranded_DN30092_c0_g1_i2	P10
ppa_stranded_DN30493_c5_g1_i1	ppa_stranded_DN30493_c4_g4_i3	P10
ppa_stranded_DN30915_c1_g1_i3	ppa_stranded_DN30915_c1_g1_i6	P10
ppa_stranded_DN31212_c0_g3_i1	ppa_stranded_DN31212_c0_g3_i1	P10
ppa_stranded_DN31543_c0_g1_i1	ppa_stranded_DN31543_c0_g1_i1	P10
ppa_stranded_DN33784_c0_g1_i1	ppa_stranded_DN33784_c0_g1_i1	P10
ppa_stranded_DN23577_c0_g1_i2	PPA01303	P10
ppa_stranded_DN19761_c0_g1_i2	PPA01935	P10
ppa_stranded_DN8704_c0_g1_i1	PPA02780	P10
ppa_stranded_DN25810_c0_g1_i4	PPA03023	P10
ppa_stranded_DN27280_c0_g1_i2	PPA05209	P10
ppa_stranded_DN18952_c0_g1_i1	PPA05782	P10
ppa_stranded_DN31106_c0_g1_i2	PPA09647	P10
ppa_stranded_DN23314_c0_g2_i1	PPA09836	P10
ppa_stranded_DN20054_c0_g1_i1	PPA12619	P10
ppa_stranded_DN21434_c1_g1_i1	PPA19537	P10
ppa_stranded_DN30094_c0_g1_i1	PPA19569	P10
ppa_stranded_DN11994_c0_g1_i1	PPA19993	P10
ppa_stranded_DN24681_c0_g2_i2	PPA21942	P10
ppa_stranded_DN28162_c0_g1_i2	PPA23168	P10
ppa_stranded_DN6041_c0_g1_i1	PPA24125	P10
ppa_stranded_DN22434_c0_g1_i1	PPA26354	P10
ppa_stranded_DN30322_c0_g1_i2	PPA27148	P10
ppa_stranded_DN28339_c2_g2_i1	PPA27923	P10
ppa_stranded_DN29367_c3_g2_i2	PPA28569	P10
ppa_stranded_DN28682_c0_g6_i3	PPA29690	P10
ppa_stranded_DN24265_c0_g1_i1	PPA34792	P10
ppa_stranded_DN30493_c4_g4_i6	PPA35036	P10
ppa_stranded_DN21894_c0_g1_i1	PPA35037	P10
ppa_stranded_DN26520_c1_g5_i2	PPA35736	P10
ppa_stranded_DN23706_c0_g1_i3	PPA36545	P10
ppa_stranded_DN20298_c0_g2_i1	PPA36995	P10
ppa_stranded_DN31703_c9_g3_i1	PPA40130	P10
ppa_stranded_DN18051_c0_g1_i2	PPA41013	P10
ppa_stranded_DN13023_c0_g1_i1	PPA41710	P10
ppa_stranded_DN25135_c0_g1_i1	PPA41833	P10
ppa_stranded_DN23250_c0_g1_i1	PPA43355	P10
ppa_stranded_DN29225_c0_g3_i7	Iso_D.13540.1	P11
ppa_stranded_DN29200_c1_g4_i1	Iso_D.14609.3	P11
ppa_stranded_DN31529_c3_g2_i1	Iso_D.9808.2	P11
ppa_stranded_DN10461_c0_g1_i1	ppa_stranded_DN10461_c0_g1_i1	P11
ppa_stranded_DN17866_c0_g1_i1	ppa_stranded_DN17866_c0_g1_i1	P11
ppa_stranded_DN17902_c0_g1_i1	ppa_stranded_DN17902_c0_g1_i1	P11
ppa_stranded_DN18697_c0_g1_i2	ppa_stranded_DN18697_c0_g1_i2	P11
ppa_stranded_DN19912_c0_g1_i1	ppa_stranded_DN19912_c0_g1_i1	P11
ppa_stranded_DN20669_c0_g2_i1	ppa_stranded_DN20669_c0_g2_i1	P11
ppa_stranded_DN20846_c0_g1_i1	ppa_stranded_DN20846_c0_g1_i1	P11
ppa_stranded_DN21179_c0_g1_i1	ppa_stranded_DN21179_c0_g1_i1	P11
ppa_stranded_DN23035_c0_g1_i1	ppa_stranded_DN23035_c0_g1_i1	P11
ppa_stranded_DN24084_c0_g2_i1	ppa_stranded_DN24084_c0_g2_i1	P11
ppa_stranded_DN25228_c0_g1_i8	ppa_stranded_DN25228_c0_g1_i5	P11
ppa_stranded_DN25678_c0_g2_i2	ppa_stranded_DN25678_c0_g2_i2	P11
ppa_stranded_DN26490_c0_g2_i1	ppa_stranded_DN26490_c0_g2_i1	P11
ppa_stranded_DN26777_c0_g1_i5	ppa_stranded_DN26777_c0_g1_i4	P11
ppa_stranded_DN27370_c0_g2_i1	ppa_stranded_DN27370_c0_g2_i1	P11
ppa_stranded_DN27780_c0_g1_i1	ppa_stranded_DN27780_c0_g1_i3	P11
ppa_stranded_DN28930_c0_g1_i2	ppa_stranded_DN28930_c0_g1_i5	P11
ppa_stranded_DN29637_c1_g1_i8	ppa_stranded_DN29637_c1_g1_i8	P11
ppa_stranded_DN30309_c0_g1_i4	ppa_stranded_DN30309_c0_g1_i5	P11
ppa_stranded_DN30414_c4_g6_i2	ppa_stranded_DN30414_c4_g6_i5	P11
ppa_stranded_DN31048_c0_g1_i1	ppa_stranded_DN31048_c0_g1_i1	P11
ppa_stranded_DN31079_c0_g2_i1	ppa_stranded_DN31079_c0_g2_i1	P11
ppa_stranded_DN31147_c2_g1_i2	ppa_stranded_DN31147_c2_g1_i3	P11
ppa_stranded_DN31310_c3_g1_i1	ppa_stranded_DN31310_c3_g1_i1	P11
ppa_stranded_DN31595_c6_g11_i1	ppa_stranded_DN31595_c6_g11_i2	P11
ppa_stranded_DN7652_c0_g2_i1	ppa_stranded_DN7652_c0_g2_i1	P11
ppa_stranded_DN22616_c0_g1_i1	PPA00162	P11
ppa_stranded_DN29788_c0_g1_i1	PPA01023	P11
ppa_stranded_DN24650_c0_g1_i1	PPA01874	P11
ppa_stranded_DN25941_c0_g1_i3	PPA01881	P11
ppa_stranded_DN23642_c0_g1_i5	PPA03265	P11
ppa_stranded_DN6518_c0_g1_i1	PPA03918	P11
ppa_stranded_DN2313_c0_g1_i1	PPA05287	P11
ppa_stranded_DN30076_c0_g4_i1	PPA06446	P11
ppa_stranded_DN26736_c0_g2_i2	PPA07415	P11
ppa_stranded_DN23057_c0_g1_i2	PPA07521	P11
ppa_stranded_DN26499_c0_g1_i3	PPA07576	P11
ppa_stranded_DN22397_c0_g1_i1	PPA07969	P11
ppa_stranded_DN22642_c0_g1_i1	PPA08180	P11
ppa_stranded_DN29593_c1_g2_i1	PPA08503	P11
ppa_stranded_DN28797_c0_g1_i2	PPA08967	P11
ppa_stranded_DN7983_c0_g1_i1	PPA09598	P11
ppa_stranded_DN23780_c0_g2_i1	PPA10212	P11
ppa_stranded_DN31225_c4_g6_i3	PPA10285	P11
ppa_stranded_DN22878_c0_g1_i1	PPA11869	P11
ppa_stranded_DN39945_c0_g1_i1	PPA12620	P11
ppa_stranded_DN23584_c0_g1_i1	PPA12964	P11
ppa_stranded_DN26127_c2_g1_i1	PPA13859	P11
ppa_stranded_DN21283_c0_g1_i4	PPA14172	P11
ppa_stranded_DN27947_c0_g1_i1	PPA14480	P11
ppa_stranded_DN31446_c0_g2_i1	PPA14513	P11
ppa_stranded_DN17634_c0_g1_i2	PPA14599	P11
ppa_stranded_DN30492_c0_g2_i1	PPA14691	P11
ppa_stranded_DN27578_c0_g1_i2	PPA15725	P11
ppa_stranded_DN29806_c1_g1_i2	PPA16618	P11
ppa_stranded_DN23613_c0_g1_i2	PPA16775	P11
ppa_stranded_DN18435_c0_g2_i1	PPA17280	P11
ppa_stranded_DN30657_c3_g1_i1	PPA17391	P11
ppa_stranded_DN20624_c0_g1_i1	PPA18589	P11
ppa_stranded_DN28705_c0_g1_i2	PPA18746	P11
ppa_stranded_DN26243_c0_g1_i1	PPA18871	P11
ppa_stranded_DN39706_c0_g1_i1	PPA19919	P11
ppa_stranded_DN20008_c0_g1_i2	PPA19975	P11
ppa_stranded_DN24387_c0_g2_i1	PPA19990	P11
ppa_stranded_DN27156_c0_g1_i5	PPA20403	P11
ppa_stranded_DN18271_c0_g1_i1	PPA20519	P11
ppa_stranded_DN23695_c0_g2_i1	PPA21883	P11
ppa_stranded_DN18466_c0_g1_i1	PPA22957	P11
ppa_stranded_DN28106_c0_g1_i2	PPA27141	P11
ppa_stranded_DN21931_c0_g2_i1	PPA28208	P11
ppa_stranded_DN23299_c0_g1_i2	PPA28537	P11
ppa_stranded_DN31324_c2_g1_i1	PPA32893	P11
ppa_stranded_DN20540_c0_g1_i1	PPA33070	P11
ppa_stranded_DN30968_c0_g5_i1	PPA33630	P11
ppa_stranded_DN31010_c1_g2_i4	PPA33921	P11
ppa_stranded_DN26170_c0_g1_i1	PPA34998	P11
ppa_stranded_DN27923_c1_g1_i1	PPA35585	P11
ppa_stranded_DN13009_c0_g1_i1	PPA35797	P11
ppa_stranded_DN26105_c0_g2_i1	PPA36602	P11
ppa_stranded_DN31529_c2_g2_i2	PPA36656	P11
ppa_stranded_DN22668_c0_g1_i1	PPA36868	P11
ppa_stranded_DN30970_c5_g14_i5	PPA37474	P11
ppa_stranded_DN31537_c11_g1_i1	PPA37940	P11
ppa_stranded_DN27762_c0_g1_i1	PPA38119	P11
ppa_stranded_DN30970_c0_g1_i1	PPA39114	P11
ppa_stranded_DN9563_c0_g1_i1	PPA39449	P11
ppa_stranded_DN31453_c1_g1_i1	PPA39859	P11
ppa_stranded_DN27342_c0_g1_i1	PPA39962	P11
ppa_stranded_DN16915_c0_g1_i1	PPA40354	P11
ppa_stranded_DN30970_c5_g4_i2	PPA40518	P11
ppa_stranded_DN31100_c0_g7_i2	PPA41155	P11
ppa_stranded_DN24226_c0_g1_i2	PPA41312	P11
ppa_stranded_DN25965_c0_g3_i2	PPA41962	P11
ppa_stranded_DN26769_c0_g1_i1	PPA43326	P11
ppa_stranded_DN31090_c3_g4_i2	PPA43805	P11
ppa_stranded_DN30133_c1_g1_i1	PPA45398	P11
ppa_stranded_DN22757_c0_g1_i2	Contig16-snapTAU.216	P2
ppa_stranded_DN25365_c0_g1_i2	Contig21-snapTAU.284	P2
ppa_stranded_DN20796_c0_g1_i1	Contig3-snapTAU.319	P2
ppa_stranded_DN31544_c6_g8_i1	Contig71-snapTAU.14	P2
ppa_stranded_DN22521_c0_g1_i2	Contig8-snapTAU.191	P2
ppa_stranded_DN22604_c0_g1_i1	Iso_D.1006.1	P2
ppa_stranded_DN29029_c0_g1_i1	Iso_D.10506.1	P2
ppa_stranded_DN31268_c0_g1_i7	Iso_D.11333.2	P2
ppa_stranded_DN25173_c0_g2_i1	Iso_D.12889.3	P2
ppa_stranded_DN31321_c1_g1_i17	Iso_D.12914.4	P2
ppa_stranded_DN28663_c0_g2_i3	Iso_D.7605.3	P2
ppa_stranded_DN21338_c0_g1_i2	Iso_D.9898.1	P2
ppa_stranded_DN27667_c0_g1_i1	isopolya.3418.1	P2
ppa_stranded_DN26624_c0_g1_i2	isopolya.4291.3	P2
ppa_stranded_DN26033_c0_g1_i1	isopolya.4325.2	P2
ppa_stranded_DN10287_c0_g2_i1	ppa_stranded_DN10287_c0_g1_i1	P2
ppa_stranded_DN13087_c0_g1_i1	ppa_stranded_DN13087_c0_g1_i1	P2
ppa_stranded_DN16418_c0_g1_i2	ppa_stranded_DN16418_c0_g1_i2	P2
ppa_stranded_DN16485_c0_g1_i1	ppa_stranded_DN16485_c0_g1_i1	P2
ppa_stranded_DN16485_c0_g2_i1	ppa_stranded_DN16485_c0_g2_i1	P2
ppa_stranded_DN16529_c0_g2_i1	ppa_stranded_DN16529_c0_g2_i1	P2
ppa_stranded_DN16647_c0_g1_i2	ppa_stranded_DN16647_c0_g1_i2	P2
ppa_stranded_DN17546_c0_g1_i1	ppa_stranded_DN17546_c0_g1_i1	P2
ppa_stranded_DN17873_c0_g1_i2	ppa_stranded_DN17873_c0_g1_i2	P2
ppa_stranded_DN18104_c0_g1_i1	ppa_stranded_DN18104_c0_g1_i1	P2
ppa_stranded_DN18711_c0_g1_i1	ppa_stranded_DN18711_c0_g1_i1	P2
ppa_stranded_DN18880_c0_g1_i1	ppa_stranded_DN18880_c0_g1_i1	P2
ppa_stranded_DN19729_c0_g1_i1	ppa_stranded_DN19729_c0_g1_i2	P2
ppa_stranded_DN19789_c0_g1_i3	ppa_stranded_DN19789_c0_g1_i3	P2
ppa_stranded_DN20474_c0_g1_i2	ppa_stranded_DN20474_c0_g1_i2	P2
ppa_stranded_DN20714_c0_g3_i1	ppa_stranded_DN20714_c0_g3_i1	P2
ppa_stranded_DN20803_c0_g1_i1	ppa_stranded_DN20803_c0_g1_i1	P2
ppa_stranded_DN20883_c0_g1_i1	ppa_stranded_DN20883_c0_g1_i1	P2
ppa_stranded_DN21065_c0_g1_i1	ppa_stranded_DN21065_c0_g1_i1	P2
ppa_stranded_DN21103_c0_g1_i1	ppa_stranded_DN21103_c0_g1_i1	P2
ppa_stranded_DN21249_c0_g2_i3	ppa_stranded_DN21249_c0_g2_i1	P2
ppa_stranded_DN21341_c0_g1_i1	ppa_stranded_DN21341_c0_g1_i1	P2
ppa_stranded_DN21660_c0_g1_i1	ppa_stranded_DN21660_c0_g1_i1	P2
ppa_stranded_DN21673_c0_g2_i1	ppa_stranded_DN21673_c0_g1_i1	P2
ppa_stranded_DN21773_c0_g1_i1	ppa_stranded_DN21773_c0_g1_i1	P2
ppa_stranded_DN21809_c0_g1_i1	ppa_stranded_DN21809_c0_g1_i1	P2
ppa_stranded_DN21860_c0_g1_i1	ppa_stranded_DN21860_c0_g1_i2	P2
ppa_stranded_DN21997_c0_g1_i1	ppa_stranded_DN21997_c0_g1_i1	P2
ppa_stranded_DN22459_c0_g2_i2	ppa_stranded_DN22459_c0_g2_i1	P2
ppa_stranded_DN22896_c0_g1_i5	ppa_stranded_DN22896_c0_g1_i2	P2
ppa_stranded_DN23132_c0_g1_i1	ppa_stranded_DN23132_c0_g1_i1	P2
ppa_stranded_DN23211_c0_g1_i2	ppa_stranded_DN23211_c0_g1_i1	P2
ppa_stranded_DN23257_c1_g1_i1	ppa_stranded_DN23257_c1_g1_i1	P2
ppa_stranded_DN23618_c0_g2_i2	ppa_stranded_DN23618_c0_g2_i3	P2
ppa_stranded_DN23678_c0_g2_i2	ppa_stranded_DN23678_c0_g2_i2	P2
ppa_stranded_DN23779_c0_g1_i1	ppa_stranded_DN23779_c0_g1_i2	P2
ppa_stranded_DN23870_c0_g1_i1	ppa_stranded_DN23870_c0_g1_i1	P2
ppa_stranded_DN23985_c0_g1_i1	ppa_stranded_DN23985_c0_g1_i1	P2
ppa_stranded_DN24166_c0_g1_i2	ppa_stranded_DN24166_c0_g1_i2	P2
ppa_stranded_DN24287_c0_g1_i1	ppa_stranded_DN24287_c0_g1_i1	P2
ppa_stranded_DN24316_c0_g1_i1	ppa_stranded_DN24316_c0_g1_i1	P2
ppa_stranded_DN24511_c1_g2_i3	ppa_stranded_DN24511_c1_g2_i1	P2
ppa_stranded_DN24691_c0_g1_i3	ppa_stranded_DN24691_c0_g1_i6	P2
ppa_stranded_DN24818_c0_g1_i1	ppa_stranded_DN24818_c0_g1_i1	P2
ppa_stranded_DN24879_c0_g1_i2	ppa_stranded_DN24879_c0_g1_i2	P2
ppa_stranded_DN24890_c0_g1_i2	ppa_stranded_DN24890_c0_g1_i1	P2
ppa_stranded_DN25171_c0_g3_i2	ppa_stranded_DN25171_c0_g3_i1	P2
ppa_stranded_DN25233_c0_g1_i1	ppa_stranded_DN25233_c0_g1_i1	P2
ppa_stranded_DN25322_c0_g1_i1	ppa_stranded_DN25322_c0_g1_i2	P2
ppa_stranded_DN25555_c0_g2_i2	ppa_stranded_DN25555_c0_g2_i1	P2
ppa_stranded_DN25598_c0_g2_i2	ppa_stranded_DN25598_c0_g2_i2	P2
ppa_stranded_DN25789_c0_g2_i1	ppa_stranded_DN25789_c0_g2_i1	P2
ppa_stranded_DN25816_c0_g1_i1	ppa_stranded_DN25816_c0_g1_i1	P2
ppa_stranded_DN25826_c0_g1_i1	ppa_stranded_DN25826_c0_g1_i1	P2
ppa_stranded_DN25985_c0_g1_i1	ppa_stranded_DN25985_c0_g1_i1	P2
ppa_stranded_DN26002_c0_g1_i1	ppa_stranded_DN26002_c0_g1_i1	P2
ppa_stranded_DN26056_c0_g2_i1	ppa_stranded_DN26056_c0_g2_i4	P2
ppa_stranded_DN26070_c0_g1_i3	ppa_stranded_DN26070_c0_g1_i3	P2
ppa_stranded_DN26121_c0_g1_i1	ppa_stranded_DN26121_c0_g1_i3	P2
ppa_stranded_DN26305_c0_g1_i3	ppa_stranded_DN26305_c0_g1_i1	P2
ppa_stranded_DN26329_c0_g1_i2	ppa_stranded_DN26329_c0_g1_i2	P2
ppa_stranded_DN26429_c0_g2_i2	ppa_stranded_DN26429_c0_g2_i2	P2
ppa_stranded_DN26620_c0_g1_i2	ppa_stranded_DN26620_c0_g1_i2	P2
ppa_stranded_DN26731_c0_g1_i2	ppa_stranded_DN26731_c0_g1_i3	P2
ppa_stranded_DN26757_c0_g1_i3	ppa_stranded_DN26757_c0_g1_i3	P2
ppa_stranded_DN26763_c0_g1_i1	ppa_stranded_DN26763_c0_g1_i1	P2
ppa_stranded_DN26896_c1_g2_i1	ppa_stranded_DN26896_c1_g2_i2	P2
ppa_stranded_DN26929_c1_g1_i1	ppa_stranded_DN26929_c1_g1_i1	P2
ppa_stranded_DN26949_c0_g1_i1	ppa_stranded_DN26949_c0_g1_i1	P2
ppa_stranded_DN27109_c0_g1_i2	ppa_stranded_DN27109_c0_g1_i1	P2
ppa_stranded_DN27433_c0_g3_i8	ppa_stranded_DN27433_c0_g3_i4	P2
ppa_stranded_DN27492_c0_g2_i2	ppa_stranded_DN27492_c0_g2_i2	P2
ppa_stranded_DN27581_c0_g2_i1	ppa_stranded_DN27581_c0_g2_i1	P2
ppa_stranded_DN27650_c0_g1_i1	ppa_stranded_DN27650_c0_g1_i1	P2
ppa_stranded_DN27768_c0_g1_i3	ppa_stranded_DN27768_c0_g1_i5	P2
ppa_stranded_DN28011_c0_g2_i2	ppa_stranded_DN28011_c0_g2_i2	P2
ppa_stranded_DN28166_c0_g2_i3	ppa_stranded_DN28166_c0_g2_i3	P2
ppa_stranded_DN28225_c0_g1_i3	ppa_stranded_DN28225_c0_g1_i2	P2
ppa_stranded_DN28379_c1_g2_i1	ppa_stranded_DN28379_c1_g2_i8	P2
ppa_stranded_DN28412_c0_g3_i3	ppa_stranded_DN28412_c0_g3_i3	P2
ppa_stranded_DN28597_c0_g2_i2	ppa_stranded_DN28597_c0_g2_i4	P2
ppa_stranded_DN28643_c2_g1_i4	ppa_stranded_DN28643_c2_g1_i2	P2
ppa_stranded_DN28697_c2_g3_i1	ppa_stranded_DN28697_c2_g3_i1	P2
ppa_stranded_DN28704_c0_g1_i2	ppa_stranded_DN28704_c0_g1_i2	P2
ppa_stranded_DN28957_c0_g1_i2	ppa_stranded_DN28957_c0_g1_i2	P2
ppa_stranded_DN28988_c0_g2_i1	ppa_stranded_DN28988_c0_g2_i1	P2
ppa_stranded_DN29005_c0_g1_i6	ppa_stranded_DN29005_c0_g1_i1	P2
ppa_stranded_DN29029_c0_g2_i1	ppa_stranded_DN29029_c0_g2_i1	P2
ppa_stranded_DN29077_c1_g1_i2	ppa_stranded_DN29077_c1_g1_i6	P2
ppa_stranded_DN29278_c3_g1_i1	ppa_stranded_DN29278_c3_g1_i1	P2
ppa_stranded_DN29317_c0_g1_i1	ppa_stranded_DN29317_c0_g1_i1	P2
ppa_stranded_DN29351_c0_g1_i3	ppa_stranded_DN29351_c0_g1_i3	P2
ppa_stranded_DN29354_c0_g1_i1	ppa_stranded_DN29354_c0_g1_i1	P2
ppa_stranded_DN29418_c0_g2_i1	ppa_stranded_DN29418_c0_g2_i2	P2
ppa_stranded_DN29504_c0_g1_i9	ppa_stranded_DN29504_c0_g1_i9	P2
ppa_stranded_DN29594_c0_g1_i1	ppa_stranded_DN29594_c0_g1_i1	P2
ppa_stranded_DN29629_c0_g1_i6	ppa_stranded_DN29629_c0_g1_i6	P2
ppa_stranded_DN29702_c0_g1_i2	ppa_stranded_DN29702_c0_g1_i1	P2
ppa_stranded_DN29707_c0_g1_i1	ppa_stranded_DN29707_c0_g1_i3	P2
ppa_stranded_DN29776_c0_g1_i2	ppa_stranded_DN29776_c0_g1_i4	P2
ppa_stranded_DN30080_c0_g1_i4	ppa_stranded_DN30080_c0_g1_i2	P2
ppa_stranded_DN30082_c0_g1_i3	ppa_stranded_DN30082_c0_g1_i3	P2
ppa_stranded_DN30112_c0_g2_i3	ppa_stranded_DN30112_c0_g2_i6	P2
ppa_stranded_DN30335_c1_g2_i6	ppa_stranded_DN30335_c1_g2_i4	P2
ppa_stranded_DN30402_c0_g1_i1	ppa_stranded_DN30402_c0_g1_i1	P2
ppa_stranded_DN30425_c0_g1_i4	ppa_stranded_DN30425_c0_g1_i1	P2
ppa_stranded_DN30480_c0_g1_i4	ppa_stranded_DN30480_c0_g1_i3	P2
ppa_stranded_DN30604_c0_g1_i17	ppa_stranded_DN30604_c0_g1_i12	P2
ppa_stranded_DN30677_c4_g1_i5	ppa_stranded_DN30677_c4_g1_i5	P2
ppa_stranded_DN30739_c0_g1_i4	ppa_stranded_DN30739_c0_g1_i4	P2
ppa_stranded_DN30904_c0_g2_i1	ppa_stranded_DN30904_c0_g2_i13	P2
ppa_stranded_DN30933_c0_g3_i7	ppa_stranded_DN30933_c0_g3_i7	P2
ppa_stranded_DN30986_c0_g2_i3	ppa_stranded_DN30986_c0_g2_i4	P2
ppa_stranded_DN31011_c3_g7_i3	ppa_stranded_DN31011_c3_g7_i4	P2
ppa_stranded_DN31100_c0_g4_i1	ppa_stranded_DN31100_c0_g4_i1	P2
ppa_stranded_DN31180_c5_g2_i4	ppa_stranded_DN31180_c4_g1_i2	P2
ppa_stranded_DN31231_c1_g1_i2	ppa_stranded_DN31231_c1_g1_i2	P2
ppa_stranded_DN31254_c1_g7_i9	ppa_stranded_DN31254_c1_g7_i7	P2
ppa_stranded_DN31362_c0_g1_i2	ppa_stranded_DN31362_c0_g1_i1	P2
ppa_stranded_DN31396_c3_g3_i4	ppa_stranded_DN31396_c3_g3_i11	P2
ppa_stranded_DN31403_c0_g1_i5	ppa_stranded_DN31403_c0_g1_i5	P2
ppa_stranded_DN31438_c3_g3_i9	ppa_stranded_DN31438_c3_g3_i7	P2
ppa_stranded_DN31505_c2_g2_i1	ppa_stranded_DN31505_c2_g2_i2	P2
ppa_stranded_DN31507_c0_g1_i1	ppa_stranded_DN31507_c0_g1_i2	P2
ppa_stranded_DN31529_c3_g7_i5	ppa_stranded_DN31529_c3_g7_i2	P2
ppa_stranded_DN31550_c1_g2_i26	ppa_stranded_DN31550_c1_g2_i14	P2
ppa_stranded_DN31593_c0_g11_i2	ppa_stranded_DN31593_c0_g11_i2	P2
ppa_stranded_DN32008_c0_g1_i1	ppa_stranded_DN32008_c0_g1_i1	P2
ppa_stranded_DN32923_c0_g1_i1	ppa_stranded_DN32923_c0_g1_i1	P2
ppa_stranded_DN33078_c0_g1_i1	ppa_stranded_DN33078_c0_g1_i1	P2
ppa_stranded_DN34245_c0_g1_i1	ppa_stranded_DN34245_c0_g1_i1	P2
ppa_stranded_DN3530_c0_g1_i1	ppa_stranded_DN3530_c0_g1_i1	P2
ppa_stranded_DN36369_c0_g1_i1	ppa_stranded_DN36369_c0_g1_i1	P2
ppa_stranded_DN36415_c0_g1_i1	ppa_stranded_DN36415_c0_g1_i1	P2
ppa_stranded_DN39680_c0_g1_i1	ppa_stranded_DN39680_c0_g1_i1	P2
ppa_stranded_DN4357_c0_g1_i1	ppa_stranded_DN4357_c0_g2_i1	P2
ppa_stranded_DN4501_c0_g1_i1	ppa_stranded_DN4501_c0_g1_i1	P2
ppa_stranded_DN48103_c0_g1_i1	ppa_stranded_DN48103_c0_g1_i1	P2
ppa_stranded_DN50214_c0_g1_i1	ppa_stranded_DN50214_c0_g1_i1	P2
ppa_stranded_DN7138_c0_g1_i1	ppa_stranded_DN7138_c0_g1_i1	P2
ppa_stranded_DN7360_c0_g1_i1	ppa_stranded_DN7360_c0_g1_i1	P2
ppa_stranded_DN8651_c0_g2_i1	ppa_stranded_DN8651_c0_g2_i1	P2
ppa_stranded_DN8971_c0_g1_i1	ppa_stranded_DN8971_c0_g1_i1	P2
ppa_stranded_DN9401_c0_g1_i1	ppa_stranded_DN9401_c0_g1_i1	P2
ppa_stranded_DN9612_c0_g1_i1	ppa_stranded_DN9612_c0_g1_i1	P2
ppa_stranded_DN22516_c0_g1_i2	PPA00021	P2
ppa_stranded_DN27813_c1_g1_i1	PPA00049	P2
ppa_stranded_DN24835_c0_g1_i1	PPA00064	P2
ppa_stranded_DN22514_c0_g1_i1	PPA00065	P2
ppa_stranded_DN30101_c0_g2_i6	PPA00070	P2
ppa_stranded_DN27909_c0_g1_i1	PPA00158	P2
ppa_stranded_DN19686_c0_g2_i1	PPA00163	P2
ppa_stranded_DN26585_c0_g1_i4	PPA00298	P2
ppa_stranded_DN26119_c0_g1_i1	PPA00672	P2
ppa_stranded_DN27897_c0_g1_i2	PPA00829	P2
ppa_stranded_DN30282_c0_g2_i1	PPA00850	P2
ppa_stranded_DN22783_c0_g2_i2	PPA01149	P2
ppa_stranded_DN26923_c0_g2_i1	PPA01245	P2
ppa_stranded_DN23413_c0_g1_i1	PPA01432	P2
ppa_stranded_DN21282_c0_g1_i1	PPA01555	P2
ppa_stranded_DN31755_c0_g1_i1	PPA01851	P2
ppa_stranded_DN22186_c0_g1_i1	PPA01958	P2
ppa_stranded_DN23354_c0_g2_i1	PPA02078	P2
ppa_stranded_DN2654_c0_g2_i1	PPA02113	P2
ppa_stranded_DN26115_c0_g1_i1	PPA02176	P2
ppa_stranded_DN29964_c1_g1_i6	PPA02220	P2
ppa_stranded_DN13607_c0_g1_i1	PPA02252	P2
ppa_stranded_DN28265_c0_g1_i3	PPA02511	P2
ppa_stranded_DN28611_c0_g1_i1	PPA02578	P2
ppa_stranded_DN44020_c0_g1_i1	PPA02611	P2
ppa_stranded_DN29065_c2_g1_i1	PPA02787	P2
ppa_stranded_DN30960_c7_g1_i1	PPA02936	P2
ppa_stranded_DN27024_c0_g1_i1	PPA02956	P2
ppa_stranded_DN5892_c0_g1_i1	PPA03108	P2
ppa_stranded_DN15775_c0_g1_i1	PPA03288	P2
ppa_stranded_DN25347_c0_g1_i1	PPA03345	P2
ppa_stranded_DN28429_c1_g1_i1	PPA03364	P2
ppa_stranded_DN24345_c0_g1_i2	PPA03411	P2
ppa_stranded_DN23585_c0_g1_i2	PPA03479	P2
ppa_stranded_DN28303_c0_g1_i10	PPA03589	P2
ppa_stranded_DN44193_c0_g1_i1	PPA03842	P2
ppa_stranded_DN25889_c0_g1_i1	PPA04186	P2
ppa_stranded_DN20432_c0_g1_i2	PPA04229	P2
ppa_stranded_DN20239_c0_g1_i1	PPA04942	P2
ppa_stranded_DN31511_c0_g1_i2	PPA05025	P2
ppa_stranded_DN30863_c0_g1_i3	PPA05618	P2
ppa_stranded_DN28032_c0_g2_i2	PPA05620	P2
ppa_stranded_DN22459_c0_g1_i1	PPA05680	P2
ppa_stranded_DN5534_c0_g1_i1	PPA05728	P2
ppa_stranded_DN40318_c0_g1_i1	PPA05769	P2
ppa_stranded_DN28533_c2_g1_i3	PPA05795	P2
ppa_stranded_DN31310_c6_g4_i1	PPA05920	P2
ppa_stranded_DN23653_c0_g1_i5	PPA05941	P2
ppa_stranded_DN21004_c0_g1_i4	PPA05994	P2
ppa_stranded_DN30521_c0_g1_i5	PPA06017	P2
ppa_stranded_DN40793_c0_g1_i1	PPA06081	P2
ppa_stranded_DN11218_c0_g1_i1	PPA06099	P2
ppa_stranded_DN31218_c1_g4_i1	PPA06400	P2
ppa_stranded_DN28974_c0_g1_i4	PPA06529	P2
ppa_stranded_DN39909_c0_g1_i1	PPA06624	P2
ppa_stranded_DN21681_c0_g1_i2	PPA06694	P2
ppa_stranded_DN25078_c0_g1_i1	PPA06787	P2
ppa_stranded_DN26140_c0_g1_i3	PPA06802	P2
ppa_stranded_DN26932_c0_g1_i1	PPA06862	P2
ppa_stranded_DN31187_c1_g1_i3	PPA06915	P2
ppa_stranded_DN7114_c0_g2_i1	PPA07131	P2
ppa_stranded_DN44664_c0_g1_i1	PPA07533	P2
ppa_stranded_DN30657_c5_g1_i16	PPA07714	P2
ppa_stranded_DN12071_c0_g1_i1	PPA07736	P2
ppa_stranded_DN30697_c0_g1_i2	PPA08181	P2
ppa_stranded_DN22955_c0_g2_i1	PPA08198	P2
ppa_stranded_DN26943_c0_g1_i1	PPA08243	P2
ppa_stranded_DN29532_c0_g1_i11	PPA08244	P2
ppa_stranded_DN30734_c1_g1_i3	PPA08279	P2
ppa_stranded_DN29431_c0_g1_i2	PPA08403	P2
ppa_stranded_DN28150_c1_g1_i3	PPA08488	P2
ppa_stranded_DN28367_c0_g1_i2	PPA08563	P2
ppa_stranded_DN13488_c0_g1_i1	PPA08629	P2
ppa_stranded_DN21656_c0_g1_i1	PPA08646	P2
ppa_stranded_DN30451_c1_g2_i1	PPA08660	P2
ppa_stranded_DN24653_c0_g1_i1	PPA08680	P2
ppa_stranded_DN49950_c0_g1_i1	PPA09329	P2
ppa_stranded_DN25838_c0_g1_i1	PPA09364	P2
ppa_stranded_DN27320_c0_g1_i3	PPA09506	P2
ppa_stranded_DN11279_c0_g1_i1	PPA09512	P2
ppa_stranded_DN29827_c0_g1_i1	PPA09521	P2
ppa_stranded_DN11790_c0_g2_i1	PPA09936	P2
ppa_stranded_DN19712_c0_g2_i1	PPA10003	P2
ppa_stranded_DN30921_c0_g1_i1	PPA10102	P2
ppa_stranded_DN26123_c0_g1_i1	PPA10248	P2
ppa_stranded_DN31123_c0_g1_i1	PPA10373	P2
ppa_stranded_DN23609_c0_g1_i4	PPA10477	P2
ppa_stranded_DN26810_c0_g1_i1	PPA11161	P2
ppa_stranded_DN31072_c0_g1_i2	PPA11455	P2
ppa_stranded_DN45335_c0_g1_i1	PPA11537	P2
ppa_stranded_DN23645_c0_g1_i1	PPA11545	P2
ppa_stranded_DN30997_c0_g1_i7	PPA11593	P2
ppa_stranded_DN28419_c0_g1_i1	PPA11612	P2
ppa_stranded_DN45746_c0_g1_i1	PPA11921	P2
ppa_stranded_DN25894_c0_g1_i2	PPA11929	P2
ppa_stranded_DN30236_c0_g1_i1	PPA12207	P2
ppa_stranded_DN47311_c0_g1_i1	PPA12325	P2
ppa_stranded_DN22868_c0_g1_i4	PPA12536	P2
ppa_stranded_DN23249_c0_g1_i1	PPA12560	P2
ppa_stranded_DN30976_c0_g2_i2	PPA12629	P2
ppa_stranded_DN23415_c0_g1_i1	PPA12642	P2
ppa_stranded_DN23322_c0_g1_i1	PPA12783	P2
ppa_stranded_DN23257_c0_g1_i1	PPA12846	P2
ppa_stranded_DN18258_c0_g1_i2	PPA13101	P2
ppa_stranded_DN26375_c0_g1_i2	PPA13109	P2
ppa_stranded_DN20882_c0_g1_i1	PPA13116	P2
ppa_stranded_DN29382_c0_g1_i4	PPA13364	P2
ppa_stranded_DN25454_c0_g1_i3	PPA13458	P2
ppa_stranded_DN31291_c2_g1_i2	PPA13564	P2
ppa_stranded_DN31396_c3_g1_i2	PPA13584	P2
ppa_stranded_DN48294_c0_g1_i1	PPA13585	P2
ppa_stranded_DN20914_c0_g1_i1	PPA13690	P2
ppa_stranded_DN26057_c0_g1_i3	PPA13711	P2
ppa_stranded_DN26748_c0_g1_i3	PPA13818	P2
ppa_stranded_DN19076_c0_g2_i1	PPA13949	P2
ppa_stranded_DN27960_c0_g1_i2	PPA14807	P2
ppa_stranded_DN30269_c0_g2_i4	PPA14908	P2
ppa_stranded_DN22449_c0_g2_i1	PPA15022	P2
ppa_stranded_DN29727_c3_g3_i4	PPA15060	P2
ppa_stranded_DN27990_c0_g1_i1	PPA15076	P2
ppa_stranded_DN48720_c0_g1_i1	PPA15305	P2
ppa_stranded_DN31561_c2_g2_i1	PPA15324	P2
ppa_stranded_DN30950_c1_g1_i5	PPA15439	P2
ppa_stranded_DN36835_c0_g1_i1	PPA15495	P2
ppa_stranded_DN31261_c4_g3_i7	PPA15798	P2
ppa_stranded_DN29079_c0_g1_i2	PPA15833	P2
ppa_stranded_DN15508_c0_g1_i1	PPA15843	P2
ppa_stranded_DN48704_c0_g1_i1	PPA15946	P2
ppa_stranded_DN24488_c0_g2_i1	PPA15980	P2
ppa_stranded_DN27188_c0_g1_i2	PPA16008	P2
ppa_stranded_DN11278_c0_g1_i1	PPA16059	P2
ppa_stranded_DN14522_c0_g1_i1	PPA16111	P2
ppa_stranded_DN6164_c0_g1_i1	PPA16331	P2
ppa_stranded_DN25301_c0_g2_i1	PPA16598	P2
ppa_stranded_DN28451_c0_g1_i1	PPA16635	P2
ppa_stranded_DN26686_c0_g2_i2	PPA16727	P2
ppa_stranded_DN28627_c0_g1_i3	PPA16998	P2
ppa_stranded_DN25577_c1_g1_i1	PPA17207	P2
ppa_stranded_DN22962_c0_g2_i1	PPA17296	P2
ppa_stranded_DN25670_c0_g1_i2	PPA17384	P2
ppa_stranded_DN28125_c0_g2_i1	PPA17392	P2
ppa_stranded_DN16403_c0_g1_i1	PPA17556	P2
ppa_stranded_DN22079_c0_g2_i1	PPA17627	P2
ppa_stranded_DN19709_c0_g1_i1	PPA17712	P2
ppa_stranded_DN31375_c0_g1_i1	PPA17871	P2
ppa_stranded_DN18977_c0_g2_i1	PPA18124	P2
ppa_stranded_DN28898_c1_g2_i1	PPA18364	P2
ppa_stranded_DN21149_c0_g1_i1	PPA18546	P2
ppa_stranded_DN27002_c0_g1_i3	PPA18570	P2
ppa_stranded_DN31177_c0_g1_i1	PPA18673	P2
ppa_stranded_DN17738_c0_g1_i1	PPA18714	P2
ppa_stranded_DN40233_c0_g1_i1	PPA18771	P2
ppa_stranded_DN27651_c0_g1_i4	PPA18775	P2
ppa_stranded_DN30340_c1_g2_i7	PPA18789	P2
ppa_stranded_DN18682_c0_g1_i1	PPA18824	P2
ppa_stranded_DN28114_c0_g1_i3	PPA18849	P2
ppa_stranded_DN16404_c0_g1_i1	PPA18997	P2
ppa_stranded_DN15499_c0_g1_i1	PPA19035	P2
ppa_stranded_DN19849_c0_g1_i1	PPA19042	P2
ppa_stranded_DN30355_c4_g5_i1	PPA19410	P2
ppa_stranded_DN26436_c0_g1_i5	PPA19688	P2
ppa_stranded_DN24760_c0_g1_i1	PPA19753	P2
ppa_stranded_DN28409_c0_g1_i2	PPA19756	P2
ppa_stranded_DN27859_c0_g1_i3	PPA19772	P2
ppa_stranded_DN31186_c0_g1_i10	PPA19972	P2
ppa_stranded_DN19956_c0_g1_i1	PPA20070	P2
ppa_stranded_DN23526_c0_g1_i2	PPA20220	P2
ppa_stranded_DN22051_c0_g2_i1	PPA20324	P2
ppa_stranded_DN35759_c0_g1_i1	PPA20343	P2
ppa_stranded_DN25318_c0_g1_i1	PPA20399	P2
ppa_stranded_DN18119_c0_g1_i1	PPA20419	P2
ppa_stranded_DN29560_c2_g2_i4	PPA20515	P2
ppa_stranded_DN30650_c0_g4_i1	PPA20619	P2
ppa_stranded_DN35775_c0_g1_i1	PPA20622	P2
ppa_stranded_DN24788_c0_g2_i2	PPA20642	P2
ppa_stranded_DN18283_c0_g1_i1	PPA20646	P2
ppa_stranded_DN27376_c0_g1_i1	PPA20651	P2
ppa_stranded_DN29240_c0_g1_i5	PPA20686	P2
ppa_stranded_DN31588_c0_g15_i8	PPA20962	P2
ppa_stranded_DN27340_c0_g1_i3	PPA21402	P2
ppa_stranded_DN20391_c0_g2_i3	PPA21519	P2
ppa_stranded_DN29869_c0_g1_i1	PPA21671	P2
ppa_stranded_DN29822_c3_g1_i2	PPA21673	P2
ppa_stranded_DN27786_c0_g2_i2	PPA21772	P2
ppa_stranded_DN22065_c0_g1_i1	PPA21774	P2
ppa_stranded_DN30819_c0_g1_i5	PPA21790	P2
ppa_stranded_DN29955_c1_g1_i16	PPA21791	P2
ppa_stranded_DN25121_c0_g3_i2	PPA21851	P2
ppa_stranded_DN30293_c0_g1_i1	PPA21910	P2
ppa_stranded_DN20628_c0_g2_i1	PPA21921	P2
ppa_stranded_DN10952_c0_g1_i1	PPA21987	P2
ppa_stranded_DN26162_c0_g1_i1	PPA22007	P2
ppa_stranded_DN20534_c0_g1_i1	PPA22038	P2
ppa_stranded_DN28980_c4_g1_i2	PPA22248	P2
ppa_stranded_DN48124_c0_g1_i1	PPA22412	P2
ppa_stranded_DN28712_c0_g1_i1	PPA22618	P2
ppa_stranded_DN25118_c0_g1_i1	PPA22786	P2
ppa_stranded_DN15510_c0_g1_i1	PPA22796	P2
ppa_stranded_DN30231_c0_g2_i3	PPA23314	P2
ppa_stranded_DN31286_c0_g1_i6	PPA23367	P2
ppa_stranded_DN20462_c1_g1_i1	PPA23400	P2
ppa_stranded_DN24446_c0_g2_i1	PPA23529	P2
ppa_stranded_DN20396_c0_g1_i3	PPA23684	P2
ppa_stranded_DN21872_c0_g1_i1	PPA23761	P2
ppa_stranded_DN23329_c0_g1_i3	PPA23795	P2
ppa_stranded_DN19982_c0_g1_i2	PPA23837	P2
ppa_stranded_DN30338_c0_g1_i1	PPA23945	P2
ppa_stranded_DN31520_c0_g1_i5	PPA23959	P2
ppa_stranded_DN17380_c0_g1_i1	PPA23967	P2
ppa_stranded_DN26246_c0_g1_i1	PPA24150	P2
ppa_stranded_DN16433_c0_g1_i2	PPA24322	P2
ppa_stranded_DN49050_c0_g1_i1	PPA24451	P2
ppa_stranded_DN40084_c0_g1_i1	PPA24454	P2
ppa_stranded_DN13657_c0_g1_i1	PPA24490	P2
ppa_stranded_DN31050_c0_g2_i1	PPA24534	P2
ppa_stranded_DN28079_c0_g1_i1	PPA24968	P2
ppa_stranded_DN10585_c0_g1_i1	PPA25009	P2
ppa_stranded_DN23358_c0_g1_i1	PPA25035	P2
ppa_stranded_DN34681_c0_g1_i1	PPA25268	P2
ppa_stranded_DN43912_c0_g1_i1	PPA25336	P2
ppa_stranded_DN29985_c0_g2_i5	PPA25407	P2
ppa_stranded_DN24876_c0_g1_i1	PPA25527	P2
ppa_stranded_DN12698_c0_g2_i1	PPA25944	P2
ppa_stranded_DN9779_c0_g1_i1	PPA25970	P2
ppa_stranded_DN12512_c0_g1_i1	PPA25974	P2
ppa_stranded_DN23098_c0_g1_i5	PPA26034	P2
ppa_stranded_DN29266_c0_g2_i3	PPA26107	P2
ppa_stranded_DN19450_c0_g1_i1	PPA26331	P2
ppa_stranded_DN29844_c0_g1_i1	PPA26431	P2
ppa_stranded_DN26588_c0_g1_i4	PPA26447	P2
ppa_stranded_DN18302_c0_g1_i1	PPA26553	P2
ppa_stranded_DN25520_c0_g2_i1	PPA26580	P2
ppa_stranded_DN1189_c0_g1_i1	PPA26752	P2
ppa_stranded_DN29301_c1_g1_i1	PPA27029	P2
ppa_stranded_DN44588_c0_g1_i1	PPA27033	P2
ppa_stranded_DN33116_c0_g1_i1	PPA27063	P2
ppa_stranded_DN16778_c0_g1_i2	PPA27205	P2
ppa_stranded_DN16470_c0_g1_i1	PPA27225	P2
ppa_stranded_DN22112_c0_g1_i1	PPA27516	P2
ppa_stranded_DN23960_c0_g1_i2	PPA27797	P2
ppa_stranded_DN26995_c0_g1_i2	PPA27957	P2
ppa_stranded_DN3936_c0_g1_i1	PPA27969	P2
ppa_stranded_DN30646_c0_g2_i1	PPA27985	P2
ppa_stranded_DN40156_c0_g1_i1	PPA28025	P2
ppa_stranded_DN16822_c0_g1_i1	PPA28043	P2
ppa_stranded_DN4525_c0_g2_i1	PPA28162	P2
ppa_stranded_DN4710_c0_g1_i1	PPA28476	P2
ppa_stranded_DN28813_c0_g4_i2	PPA28803	P2
ppa_stranded_DN30625_c0_g1_i6	PPA28999	P2
ppa_stranded_DN10604_c0_g1_i1	PPA29091	P2
ppa_stranded_DN28272_c0_g1_i3	PPA29145	P2
ppa_stranded_DN17548_c0_g1_i1	PPA29187	P2
ppa_stranded_DN13519_c0_g2_i1	PPA29503	P2
ppa_stranded_DN21509_c0_g1_i1	PPA29735	P2
ppa_stranded_DN45171_c0_g1_i1	PPA29765	P2
ppa_stranded_DN28880_c0_g2_i1	PPA29910	P2
ppa_stranded_DN17445_c0_g1_i1	PPA29911	P2
ppa_stranded_DN30792_c0_g1_i3	PPA29922	P2
ppa_stranded_DN21074_c0_g1_i3	PPA30108	P2
ppa_stranded_DN31349_c0_g1_i1	PPA30225	P2
ppa_stranded_DN14837_c0_g1_i1	PPA30246	P2
ppa_stranded_DN4194_c0_g2_i1	PPA30434	P2
ppa_stranded_DN23671_c0_g1_i1	PPA30704	P2
ppa_stranded_DN20258_c0_g2_i1	PPA30761	P2
ppa_stranded_DN25386_c0_g1_i1	PPA31104	P2
ppa_stranded_DN17419_c0_g1_i1	PPA31158	P2
ppa_stranded_DN49581_c0_g1_i1	PPA31448	P2
ppa_stranded_DN15558_c0_g1_i1	PPA31521	P2
ppa_stranded_DN12388_c0_g2_i1	PPA31567	P2
ppa_stranded_DN26575_c0_g1_i3	PPA31832	P2
ppa_stranded_DN30259_c1_g1_i3	PPA32117	P2
ppa_stranded_DN33870_c0_g1_i1	PPA32219	P2
ppa_stranded_DN39057_c0_g1_i1	PPA32326	P2
ppa_stranded_DN39760_c0_g1_i1	PPA32730	P2
ppa_stranded_DN31482_c0_g2_i6	PPA32901	P2
ppa_stranded_DN18282_c0_g1_i2	PPA32909	P2
ppa_stranded_DN28306_c0_g1_i2	PPA33150	P2
ppa_stranded_DN30062_c4_g1_i3	PPA33710	P2
ppa_stranded_DN17737_c0_g1_i1	PPA33989	P2
ppa_stranded_DN30970_c4_g1_i2	PPA34147	P2
ppa_stranded_DN28269_c2_g7_i2	PPA34635	P2
ppa_stranded_DN39736_c0_g1_i1	PPA34640	P2
ppa_stranded_DN31001_c1_g1_i2	PPA34821	P2
ppa_stranded_DN29990_c0_g3_i1	PPA35057	P2
ppa_stranded_DN28285_c0_g1_i2	PPA35203	P2
ppa_stranded_DN26440_c0_g1_i7	PPA35243	P2
ppa_stranded_DN50260_c0_g1_i1	PPA35380	P2
ppa_stranded_DN28905_c0_g1_i2	PPA35404	P2
ppa_stranded_DN25518_c0_g1_i1	PPA35429	P2
ppa_stranded_DN7570_c0_g1_i1	PPA35435	P2
ppa_stranded_DN21632_c0_g1_i1	PPA35587	P2
ppa_stranded_DN21835_c0_g1_i1	PPA35627	P2
ppa_stranded_DN27634_c2_g1_i5	PPA35653	P2
ppa_stranded_DN28481_c0_g2_i2	PPA35662	P2
ppa_stranded_DN12710_c0_g1_i1	PPA36625	P2
ppa_stranded_DN29465_c0_g1_i3	PPA36658	P2
ppa_stranded_DN33630_c0_g1_i1	PPA36718	P2
ppa_stranded_DN3813_c0_g1_i1	PPA36789	P2
ppa_stranded_DN24725_c0_g2_i1	PPA36794	P2
ppa_stranded_DN28967_c0_g2_i1	PPA36980	P2
ppa_stranded_DN29759_c0_g1_i3	PPA37067	P2
ppa_stranded_DN19624_c0_g1_i1	PPA37078	P2
ppa_stranded_DN21577_c0_g3_i2	PPA37459	P2
ppa_stranded_DN17104_c0_g2_i1	PPA37483	P2
ppa_stranded_DN30348_c0_g3_i9	PPA37713	P2
ppa_stranded_DN29851_c0_g1_i1	PPA37789	P2
ppa_stranded_DN25002_c0_g2_i1	PPA37843	P2
ppa_stranded_DN29812_c3_g1_i2	PPA37857	P2
ppa_stranded_DN1773_c0_g2_i1	PPA38133	P2
ppa_stranded_DN31946_c0_g1_i1	PPA38248	P2
ppa_stranded_DN3138_c0_g1_i1	PPA38377	P2
ppa_stranded_DN29134_c0_g3_i1	PPA38493	P2
ppa_stranded_DN48460_c0_g1_i1	PPA38586	P2
ppa_stranded_DN10485_c0_g1_i1	PPA38622	P2
ppa_stranded_DN36765_c0_g1_i1	PPA38714	P2
ppa_stranded_DN45807_c0_g1_i1	PPA38978	P2
ppa_stranded_DN44184_c0_g1_i1	PPA39045	P2
ppa_stranded_DN28353_c1_g3_i4	PPA39095	P2
ppa_stranded_DN30818_c1_g1_i11	PPA39291	P2
ppa_stranded_DN31507_c0_g2_i2	PPA39299	P2
ppa_stranded_DN16197_c0_g1_i2	PPA39553	P2
ppa_stranded_DN48099_c0_g1_i1	PPA39733	P2
ppa_stranded_DN30293_c0_g2_i2	PPA39735	P2
ppa_stranded_DN14329_c0_g1_i1	PPA39774	P2
ppa_stranded_DN20804_c0_g1_i1	PPA39937	P2
ppa_stranded_DN31177_c1_g1_i6	PPA39945	P2
ppa_stranded_DN30394_c0_g1_i1	PPA40055	P2
ppa_stranded_DN2968_c0_g1_i1	PPA40082	P2
ppa_stranded_DN28061_c1_g1_i1	PPA40091	P2
ppa_stranded_DN18708_c0_g1_i1	PPA40110	P2
ppa_stranded_DN31394_c2_g3_i2	PPA40187	P2
ppa_stranded_DN16816_c0_g1_i1	PPA40252	P2
ppa_stranded_DN30716_c8_g4_i1	PPA40307	P2
ppa_stranded_DN40030_c0_g1_i1	PPA40494	P2
ppa_stranded_DN23962_c0_g1_i1	PPA40610	P2
ppa_stranded_DN18314_c0_g1_i2	PPA40815	P2
ppa_stranded_DN23294_c0_g1_i2	PPA40848	P2
ppa_stranded_DN31183_c1_g1_i1	PPA40903	P2
ppa_stranded_DN10561_c0_g2_i1	PPA40927	P2
ppa_stranded_DN30334_c1_g1_i1	PPA41408	P2
ppa_stranded_DN15240_c0_g1_i1	PPA41491	P2
ppa_stranded_DN26094_c0_g1_i1	PPA41508	P2
ppa_stranded_DN30775_c0_g1_i1	PPA41629	P2
ppa_stranded_DN29924_c0_g1_i1	PPA41922	P2
ppa_stranded_DN49182_c0_g1_i1	PPA41955	P2
ppa_stranded_DN30133_c3_g1_i2	PPA42079	P2
ppa_stranded_DN26844_c0_g1_i1	PPA42155	P2
ppa_stranded_DN23676_c0_g1_i1	PPA42254	P2
ppa_stranded_DN18402_c0_g1_i1	PPA42321	P2
ppa_stranded_DN27799_c0_g2_i3	PPA42533	P2
ppa_stranded_DN8039_c0_g1_i1	PPA42699	P2
ppa_stranded_DN30695_c1_g1_i5	PPA42708	P2
ppa_stranded_DN29065_c2_g2_i3	PPA43173	P2
ppa_stranded_DN20674_c0_g1_i2	PPA43283	P2
ppa_stranded_DN25882_c0_g1_i1	PPA43424	P2
ppa_stranded_DN25785_c0_g1_i1	PPA43774	P2
ppa_stranded_DN29883_c2_g5_i8	PPA43957	P2
ppa_stranded_DN24270_c0_g2_i1	PPA43962	P2
ppa_stranded_DN25192_c0_g1_i1	PPA44008	P2
ppa_stranded_DN28841_c0_g2_i6	PPA44653	P2
ppa_stranded_DN9372_c0_g1_i1	PPA44872	P2
ppa_stranded_DN22917_c0_g1_i1	PPA45018	P2
ppa_stranded_DN30287_c0_g1_i4	PPA45104	P2
ppa_stranded_DN31240_c0_g1_i1	PPA45962	P2
ppa_stranded_DN30806_c0_g2_i1	UMM-S13-9.39-mRNA-1_frag	P2
ppa_stranded_DN26518_c0_g1_i1	UMM-S322-4.28-mRNA-1_gene1	P2
ppa_stranded_DN30838_c0_g1_i2	UMM-S440-2.126-mRNA-1_frag	P2
ppa_stranded_DN26977_c0_g2_i2	Contig137-snapTAU.17	P3
ppa_stranded_DN7646_c0_g1_i1	Contig26-snap.189	P3
ppa_stranded_DN31384_c0_g3_i1	Contig42-snapTAU.20	P3
ppa_stranded_DN30094_c1_g1_i1	Contig8-snapTAU.423	P3
ppa_stranded_DN23271_c0_g1_i2	Contig8-snapTAU.424	P3
ppa_stranded_DN31391_c2_g2_i9	Iso_D.10001.1	P3
ppa_stranded_DN31618_c3_g8_i1	Iso_D.10632.2	P3
ppa_stranded_DN22400_c0_g2_i4	Iso_D.11220.1	P3
ppa_stranded_DN22519_c0_g1_i1	Iso_D.1341.2	P3
ppa_stranded_DN22171_c0_g1_i2	Iso_D.13591.1	P3
ppa_stranded_DN30809_c0_g2_i1	Iso_D.13672.1	P3
ppa_stranded_DN31433_c4_g1_i1	Iso_D.2066.1	P3
ppa_stranded_DN26801_c2_g1_i1	Iso_D.3754.1	P3
ppa_stranded_DN26861_c1_g1_i1	Iso_D.5945.12	P3
ppa_stranded_DN29974_c0_g1_i5	Iso_D.8639.1	P3
ppa_stranded_DN29940_c0_g1_i2	Iso_D.9041.1	P3
ppa_stranded_DN15972_c0_g1_i1	Iso_D.9799.1	P3
ppa_stranded_DN31080_c2_g4_i1	isopolya.5614.1	P3
ppa_stranded_DN17998_c0_g1_i1	isototal.3890.1	P3
ppa_stranded_DN1205_c0_g1_i1	ppa_stranded_DN1205_c0_g1_i1	P3
ppa_stranded_DN15672_c0_g1_i1	ppa_stranded_DN15672_c0_g1_i1	P3
ppa_stranded_DN16223_c0_g1_i1	ppa_stranded_DN15999_c0_g1_i2	P3
ppa_stranded_DN16448_c0_g2_i1	ppa_stranded_DN16448_c0_g2_i1	P3
ppa_stranded_DN16553_c0_g1_i1	ppa_stranded_DN16553_c0_g1_i1	P3
ppa_stranded_DN17015_c0_g1_i1	ppa_stranded_DN17015_c0_g1_i1	P3
ppa_stranded_DN17401_c0_g1_i1	ppa_stranded_DN17401_c0_g1_i1	P3
ppa_stranded_DN17669_c0_g1_i1	ppa_stranded_DN17669_c0_g1_i1	P3
ppa_stranded_DN18163_c0_g1_i1	ppa_stranded_DN18163_c0_g1_i1	P3
ppa_stranded_DN18842_c0_g1_i1	ppa_stranded_DN18842_c0_g1_i1	P3
ppa_stranded_DN18865_c0_g1_i1	ppa_stranded_DN18865_c0_g1_i1	P3
ppa_stranded_DN19129_c0_g1_i1	ppa_stranded_DN19129_c0_g1_i1	P3
ppa_stranded_DN19914_c0_g1_i2	ppa_stranded_DN19914_c0_g1_i2	P3
ppa_stranded_DN20477_c0_g1_i1	ppa_stranded_DN20477_c0_g1_i1	P3
ppa_stranded_DN20520_c0_g1_i1	ppa_stranded_DN20520_c0_g1_i1	P3
ppa_stranded_DN20561_c0_g1_i1	ppa_stranded_DN20561_c0_g1_i1	P3
ppa_stranded_DN20768_c0_g1_i1	ppa_stranded_DN20768_c0_g1_i1	P3
ppa_stranded_DN21563_c0_g1_i1	ppa_stranded_DN21563_c0_g1_i1	P3
ppa_stranded_DN21609_c0_g3_i1	ppa_stranded_DN21609_c0_g3_i2	P3
ppa_stranded_DN21844_c0_g1_i1	ppa_stranded_DN21844_c0_g1_i1	P3
ppa_stranded_DN21901_c0_g1_i1	ppa_stranded_DN21901_c0_g1_i1	P3
ppa_stranded_DN22003_c0_g2_i1	ppa_stranded_DN22003_c0_g2_i1	P3
ppa_stranded_DN23014_c0_g1_i1	ppa_stranded_DN23014_c0_g1_i1	P3
ppa_stranded_DN23172_c0_g1_i3	ppa_stranded_DN23172_c0_g1_i1	P3
ppa_stranded_DN23502_c0_g2_i1	ppa_stranded_DN23502_c0_g2_i2	P3
ppa_stranded_DN23545_c0_g2_i1	ppa_stranded_DN23545_c0_g2_i1	P3
ppa_stranded_DN23768_c0_g1_i1	ppa_stranded_DN23768_c0_g1_i2	P3
ppa_stranded_DN23941_c1_g4_i1	ppa_stranded_DN23941_c1_g4_i1	P3
ppa_stranded_DN23965_c0_g1_i2	ppa_stranded_DN23965_c0_g1_i2	P3
ppa_stranded_DN24017_c0_g1_i1	ppa_stranded_DN24017_c0_g1_i1	P3
ppa_stranded_DN24042_c0_g2_i1	ppa_stranded_DN24042_c0_g2_i1	P3
ppa_stranded_DN24231_c0_g1_i1	ppa_stranded_DN24231_c0_g1_i1	P3
ppa_stranded_DN24300_c0_g2_i1	ppa_stranded_DN24300_c0_g2_i1	P3
ppa_stranded_DN24307_c0_g1_i1	ppa_stranded_DN24307_c0_g1_i1	P3
ppa_stranded_DN24678_c0_g1_i1	ppa_stranded_DN24678_c0_g1_i1	P3
ppa_stranded_DN24688_c0_g1_i1	ppa_stranded_DN24688_c0_g1_i1	P3
ppa_stranded_DN24724_c0_g1_i1	ppa_stranded_DN24724_c0_g1_i3	P3
ppa_stranded_DN24775_c0_g2_i3	ppa_stranded_DN24775_c0_g2_i1	P3
ppa_stranded_DN24780_c0_g1_i2	ppa_stranded_DN24780_c0_g1_i2	P3
ppa_stranded_DN24911_c0_g1_i1	ppa_stranded_DN24911_c0_g1_i3	P3
ppa_stranded_DN25212_c0_g2_i1	ppa_stranded_DN25212_c0_g2_i2	P3
ppa_stranded_DN25263_c0_g1_i1	ppa_stranded_DN25263_c0_g1_i1	P3
ppa_stranded_DN25780_c0_g1_i1	ppa_stranded_DN25780_c0_g1_i1	P3
ppa_stranded_DN25956_c1_g1_i1	ppa_stranded_DN25956_c1_g1_i1	P3
ppa_stranded_DN30235_c4_g2_i1	ppa_stranded_DN26012_c0_g1_i2	P3
ppa_stranded_DN26147_c0_g1_i2	ppa_stranded_DN26147_c0_g1_i2	P3
ppa_stranded_DN26155_c0_g1_i2	ppa_stranded_DN26155_c0_g1_i2	P3
ppa_stranded_DN26244_c0_g1_i3	ppa_stranded_DN26244_c0_g1_i3	P3
ppa_stranded_DN26253_c0_g1_i1	ppa_stranded_DN26253_c0_g1_i1	P3
ppa_stranded_DN26381_c0_g1_i6	ppa_stranded_DN26381_c0_g1_i6	P3
ppa_stranded_DN26415_c1_g3_i1	ppa_stranded_DN26415_c1_g3_i3	P3
ppa_stranded_DN26518_c0_g2_i1	ppa_stranded_DN26518_c0_g2_i1	P3
ppa_stranded_DN26555_c0_g1_i1	ppa_stranded_DN26555_c0_g1_i2	P3
ppa_stranded_DN26713_c0_g1_i1	ppa_stranded_DN26713_c0_g1_i1	P3
ppa_stranded_DN26716_c0_g1_i2	ppa_stranded_DN26716_c0_g1_i2	P3
ppa_stranded_DN26765_c0_g1_i2	ppa_stranded_DN26765_c0_g1_i2	P3
ppa_stranded_DN26828_c0_g1_i1	ppa_stranded_DN26828_c0_g1_i1	P3
ppa_stranded_DN26867_c0_g1_i1	ppa_stranded_DN26867_c0_g1_i1	P3
ppa_stranded_DN27000_c0_g1_i2	ppa_stranded_DN27000_c0_g1_i2	P3
ppa_stranded_DN27197_c0_g1_i3	ppa_stranded_DN27197_c0_g1_i1	P3
ppa_stranded_DN27241_c0_g3_i1	ppa_stranded_DN27241_c0_g3_i1	P3
ppa_stranded_DN27246_c0_g3_i1	ppa_stranded_DN27246_c0_g3_i1	P3
ppa_stranded_DN27390_c0_g2_i2	ppa_stranded_DN27390_c0_g1_i1	P3
ppa_stranded_DN27564_c0_g2_i1	ppa_stranded_DN27564_c0_g2_i1	P3
ppa_stranded_DN27578_c1_g1_i2	ppa_stranded_DN27578_c1_g1_i2	P3
ppa_stranded_DN27598_c1_g1_i2	ppa_stranded_DN27598_c1_g1_i2	P3
ppa_stranded_DN27618_c0_g2_i1	ppa_stranded_DN27618_c0_g2_i3	P3
ppa_stranded_DN27748_c0_g1_i4	ppa_stranded_DN27748_c0_g1_i1	P3
ppa_stranded_DN27784_c0_g1_i3	ppa_stranded_DN27784_c0_g1_i3	P3
ppa_stranded_DN27863_c0_g2_i2	ppa_stranded_DN27863_c0_g2_i2	P3
ppa_stranded_DN27886_c0_g1_i5	ppa_stranded_DN27886_c0_g1_i3	P3
ppa_stranded_DN28045_c0_g1_i1	ppa_stranded_DN28045_c0_g1_i4	P3
ppa_stranded_DN28325_c0_g2_i3	ppa_stranded_DN28325_c0_g2_i1	P3
ppa_stranded_DN28500_c0_g1_i3	ppa_stranded_DN28500_c0_g1_i1	P3
ppa_stranded_DN28688_c0_g1_i1	ppa_stranded_DN28688_c0_g1_i4	P3
ppa_stranded_DN28702_c1_g1_i8	ppa_stranded_DN28702_c1_g1_i8	P3
ppa_stranded_DN28711_c0_g2_i2	ppa_stranded_DN28711_c0_g2_i2	P3
ppa_stranded_DN28711_c0_g3_i3	ppa_stranded_DN28711_c0_g3_i1	P3
ppa_stranded_DN28798_c0_g1_i3	ppa_stranded_DN28798_c0_g1_i1	P3
ppa_stranded_DN28912_c0_g1_i1	ppa_stranded_DN28912_c0_g1_i1	P3
ppa_stranded_DN29087_c0_g1_i5	ppa_stranded_DN29087_c0_g1_i4	P3
ppa_stranded_DN29123_c5_g2_i4	ppa_stranded_DN29123_c5_g2_i4	P3
ppa_stranded_DN29144_c0_g2_i1	ppa_stranded_DN29144_c0_g2_i1	P3
ppa_stranded_DN29212_c0_g2_i4	ppa_stranded_DN29212_c0_g2_i2	P3
ppa_stranded_DN29237_c0_g1_i2	ppa_stranded_DN29237_c0_g1_i1	P3
ppa_stranded_DN29299_c0_g1_i1	ppa_stranded_DN29299_c0_g3_i1	P3
ppa_stranded_DN29381_c0_g1_i7	ppa_stranded_DN29381_c0_g1_i6	P3
ppa_stranded_DN29506_c0_g2_i6	ppa_stranded_DN29506_c0_g2_i2	P3
ppa_stranded_DN29585_c0_g1_i3	ppa_stranded_DN29585_c0_g1_i10	P3
ppa_stranded_DN29727_c3_g1_i4	ppa_stranded_DN29727_c3_g1_i4	P3
ppa_stranded_DN29917_c0_g1_i2	ppa_stranded_DN29917_c0_g1_i2	P3
ppa_stranded_DN29971_c0_g1_i2	ppa_stranded_DN29971_c0_g1_i2	P3
ppa_stranded_DN30016_c1_g1_i5	ppa_stranded_DN30016_c1_g1_i5	P3
ppa_stranded_DN30143_c1_g3_i1	ppa_stranded_DN30143_c1_g3_i1	P3
ppa_stranded_DN30149_c0_g1_i9	ppa_stranded_DN30149_c0_g1_i4	P3
ppa_stranded_DN30318_c0_g2_i1	ppa_stranded_DN30318_c0_g2_i1	P3
ppa_stranded_DN30515_c0_g2_i2	ppa_stranded_DN30515_c0_g2_i2	P3
ppa_stranded_DN30557_c0_g1_i4	ppa_stranded_DN30557_c0_g1_i4	P3
ppa_stranded_DN30653_c0_g1_i2	ppa_stranded_DN30653_c0_g1_i1	P3
ppa_stranded_DN30920_c0_g1_i3	ppa_stranded_DN30920_c0_g1_i3	P3
ppa_stranded_DN31_c0_g2_i1	ppa_stranded_DN31_c0_g2_i1	P3
ppa_stranded_DN31079_c1_g4_i5	ppa_stranded_DN31079_c1_g4_i5	P3
ppa_stranded_DN31138_c10_g1_i7	ppa_stranded_DN31138_c10_g1_i7	P3
ppa_stranded_DN31241_c1_g7_i1	ppa_stranded_DN31241_c1_g7_i1	P3
ppa_stranded_DN31268_c0_g2_i1	ppa_stranded_DN31268_c0_g2_i1	P3
ppa_stranded_DN31284_c4_g1_i2	ppa_stranded_DN31284_c4_g1_i2	P3
ppa_stranded_DN31373_c1_g1_i1	ppa_stranded_DN31373_c1_g1_i1	P3
ppa_stranded_DN31379_c1_g2_i1	ppa_stranded_DN31379_c1_g2_i1	P3
ppa_stranded_DN31433_c3_g4_i1	ppa_stranded_DN31433_c3_g4_i1	P3
ppa_stranded_DN31449_c0_g1_i2	ppa_stranded_DN31449_c0_g1_i1	P3
ppa_stranded_DN31471_c3_g2_i14	ppa_stranded_DN31471_c3_g2_i10	P3
ppa_stranded_DN31474_c0_g1_i3	ppa_stranded_DN31474_c0_g1_i3	P3
ppa_stranded_DN31502_c0_g1_i2	ppa_stranded_DN31502_c0_g1_i2	P3
ppa_stranded_DN31536_c1_g2_i3	ppa_stranded_DN31536_c1_g2_i8	P3
ppa_stranded_DN31591_c0_g16_i3	ppa_stranded_DN31591_c0_g4_i2	P3
ppa_stranded_DN36382_c0_g1_i1	ppa_stranded_DN36382_c0_g1_i1	P3
ppa_stranded_DN37583_c0_g1_i1	ppa_stranded_DN37583_c0_g1_i1	P3
ppa_stranded_DN40784_c0_g1_i1	ppa_stranded_DN40784_c0_g1_i1	P3
ppa_stranded_DN4396_c0_g1_i1	ppa_stranded_DN4396_c0_g1_i1	P3
ppa_stranded_DN44050_c0_g1_i1	ppa_stranded_DN44050_c0_g1_i1	P3
ppa_stranded_DN44159_c0_g1_i1	ppa_stranded_DN44159_c0_g1_i1	P3
ppa_stranded_DN4458_c0_g1_i1	ppa_stranded_DN4458_c0_g1_i1	P3
ppa_stranded_DN8088_c0_g2_i1	ppa_stranded_DN8088_c0_g2_i1	P3
ppa_stranded_DN8640_c0_g1_i1	ppa_stranded_DN8640_c0_g1_i1	P3
ppa_stranded_DN8875_c0_g2_i1	ppa_stranded_DN8875_c0_g2_i1	P3
ppa_stranded_DN29089_c0_g1_i4	PPA00142	P3
ppa_stranded_DN29647_c0_g1_i5	PPA00258	P3
ppa_stranded_DN29835_c0_g1_i1	PPA00797	P3
ppa_stranded_DN31617_c3_g2_i2	PPA00896	P3
ppa_stranded_DN4080_c0_g1_i1	PPA00898	P3
ppa_stranded_DN11274_c0_g2_i1	PPA01160	P3
ppa_stranded_DN29581_c0_g1_i4	PPA01181	P3
ppa_stranded_DN29209_c1_g3_i2	PPA01381	P3
ppa_stranded_DN28155_c1_g1_i2	PPA01545	P3
ppa_stranded_DN22411_c0_g2_i1	PPA01821	P3
ppa_stranded_DN31094_c8_g1_i4	PPA01826	P3
ppa_stranded_DN21982_c0_g1_i1	PPA01850	P3
ppa_stranded_DN21324_c0_g1_i2	PPA01905	P3
ppa_stranded_DN28928_c0_g1_i2	PPA01915	P3
ppa_stranded_DN17697_c0_g1_i1	PPA02067	P3
ppa_stranded_DN31595_c6_g6_i3	PPA02205	P3
ppa_stranded_DN20971_c0_g1_i1	PPA02321	P3
ppa_stranded_DN28725_c0_g1_i1	PPA02513	P3
ppa_stranded_DN23210_c0_g2_i1	PPA02739	P3
ppa_stranded_DN39742_c0_g1_i1	PPA02793	P3
ppa_stranded_DN28522_c0_g1_i3	PPA02931	P3
ppa_stranded_DN29765_c0_g1_i1	PPA03037	P3
ppa_stranded_DN17636_c0_g1_i2	PPA03562	P3
ppa_stranded_DN17321_c0_g1_i2	PPA03710	P3
ppa_stranded_DN16905_c0_g1_i1	PPA03731	P3
ppa_stranded_DN23364_c0_g1_i1	PPA03844	P3
ppa_stranded_DN27691_c0_g1_i1	PPA04159	P3
ppa_stranded_DN21703_c0_g1_i2	PPA04538	P3
ppa_stranded_DN28933_c0_g1_i1	PPA04583	P3
ppa_stranded_DN26496_c0_g1_i2	PPA04648	P3
ppa_stranded_DN23657_c0_g1_i1	PPA04650	P3
ppa_stranded_DN38427_c0_g1_i1	PPA04660	P3
ppa_stranded_DN30086_c0_g2_i12	PPA05013	P3
ppa_stranded_DN29656_c0_g2_i1	PPA05184	P3
ppa_stranded_DN31020_c1_g1_i6	PPA05383	P3
ppa_stranded_DN21828_c0_g1_i1	PPA05500	P3
ppa_stranded_DN41478_c0_g1_i1	PPA05621	P3
ppa_stranded_DN31076_c4_g1_i5	PPA05645	P3
ppa_stranded_DN22807_c0_g1_i1	PPA05907	P3
ppa_stranded_DN19067_c0_g2_i1	PPA05927	P3
ppa_stranded_DN19561_c0_g1_i2	PPA06220	P3
ppa_stranded_DN21982_c0_g3_i1	PPA06269	P3
ppa_stranded_DN31661_c1_g1_i1	PPA06574	P3
ppa_stranded_DN17102_c1_g1_i1	PPA06614	P3
ppa_stranded_DN23792_c0_g1_i2	PPA06639	P3
ppa_stranded_DN16156_c0_g1_i1	PPA07009	P3
ppa_stranded_DN28839_c0_g1_i2	PPA07052	P3
ppa_stranded_DN7119_c0_g1_i1	PPA07082	P3
ppa_stranded_DN24072_c0_g1_i1	PPA07280	P3
ppa_stranded_DN29821_c0_g1_i7	PPA07385	P3
ppa_stranded_DN15582_c0_g1_i1	PPA07538	P3
ppa_stranded_DN31303_c1_g1_i2	PPA07559	P3
ppa_stranded_DN25861_c0_g1_i1	PPA07634	P3
ppa_stranded_DN24242_c0_g1_i1	PPA07817	P3
ppa_stranded_DN20497_c0_g1_i1	PPA07870	P3
ppa_stranded_DN36743_c0_g1_i1	PPA08051	P3
ppa_stranded_DN26980_c0_g1_i2	PPA08127	P3
ppa_stranded_DN31000_c0_g7_i2	PPA08515	P3
ppa_stranded_DN36688_c0_g1_i1	PPA08591	P3
ppa_stranded_DN29109_c0_g2_i2	PPA08890	P3
ppa_stranded_DN28932_c1_g1_i2	PPA09043	P3
ppa_stranded_DN37178_c0_g1_i1	PPA09196	P3
ppa_stranded_DN27528_c0_g1_i3	PPA09222	P3
ppa_stranded_DN26261_c1_g3_i1	PPA09235	P3
ppa_stranded_DN22378_c0_g1_i2	PPA09268	P3
ppa_stranded_DN22070_c0_g1_i1	PPA09328	P3
ppa_stranded_DN21808_c0_g1_i1	PPA09626	P3
ppa_stranded_DN28507_c1_g2_i1	PPA09979	P3
ppa_stranded_DN26125_c0_g2_i1	PPA10255	P3
ppa_stranded_DN17633_c0_g1_i1	PPA10292	P3
ppa_stranded_DN32984_c0_g1_i1	PPA10647	P3
ppa_stranded_DN23624_c0_g1_i3	PPA10980	P3
ppa_stranded_DN27039_c0_g2_i1	PPA11026	P3
ppa_stranded_DN26941_c0_g2_i1	PPA11072	P3
ppa_stranded_DN31138_c13_g1_i1	PPA11389	P3
ppa_stranded_DN31458_c0_g5_i9	PPA11423	P3
ppa_stranded_DN23173_c0_g2_i5	PPA11456	P3
ppa_stranded_DN25684_c0_g1_i1	PPA11570	P3
ppa_stranded_DN39906_c0_g1_i1	PPA11711	P3
ppa_stranded_DN26984_c0_g1_i1	PPA11862	P3
ppa_stranded_DN26926_c0_g1_i1	PPA12000	P3
ppa_stranded_DN29508_c0_g4_i1	PPA12057	P3
ppa_stranded_DN27126_c0_g1_i3	PPA12150	P3
ppa_stranded_DN40699_c0_g1_i1	PPA12326	P3
ppa_stranded_DN19467_c0_g2_i1	PPA12610	P3
ppa_stranded_DN24727_c0_g1_i3	PPA12792	P3
ppa_stranded_DN48010_c0_g1_i1	PPA13133	P3
ppa_stranded_DN23215_c0_g1_i2	PPA13368	P3
ppa_stranded_DN31156_c2_g13_i1	PPA13555	P3
ppa_stranded_DN26131_c1_g1_i1	PPA13694	P3
ppa_stranded_DN28811_c1_g2_i1	PPA13826	P3
ppa_stranded_DN31647_c3_g3_i2	PPA13876	P3
ppa_stranded_DN20617_c0_g1_i1	PPA14095	P3
ppa_stranded_DN19807_c0_g1_i1	PPA14361	P3
ppa_stranded_DN15862_c0_g1_i1	PPA14576	P3
ppa_stranded_DN24626_c0_g2_i1	PPA14741	P3
ppa_stranded_DN26385_c0_g1_i2	PPA14796	P3
ppa_stranded_DN29221_c0_g1_i1	PPA15215	P3
ppa_stranded_DN31133_c0_g3_i4	PPA15295	P3
ppa_stranded_DN28042_c0_g1_i2	PPA15425	P3
ppa_stranded_DN22345_c0_g1_i1	PPA15501	P3
ppa_stranded_DN20602_c0_g3_i1	PPA15514	P3
ppa_stranded_DN20656_c0_g2_i1	PPA16153	P3
ppa_stranded_DN22013_c1_g2_i1	PPA16856	P3
ppa_stranded_DN31317_c2_g1_i7	PPA17037	P3
ppa_stranded_DN31062_c0_g1_i5	PPA17045	P3
ppa_stranded_DN30716_c8_g2_i6	PPA17129	P3
ppa_stranded_DN9455_c0_g1_i1	PPA17283	P3
ppa_stranded_DN22726_c0_g1_i1	PPA17618	P3
ppa_stranded_DN19517_c0_g1_i1	PPA17814	P3
ppa_stranded_DN10659_c0_g1_i1	PPA18099	P3
ppa_stranded_DN30111_c1_g3_i1	PPA18647	P3
ppa_stranded_DN25540_c0_g1_i3	PPA18698	P3
ppa_stranded_DN24442_c0_g1_i1	PPA18699	P3
ppa_stranded_DN15697_c0_g1_i2	PPA18777	P3
ppa_stranded_DN28048_c0_g1_i2	PPA18812	P3
ppa_stranded_DN22814_c0_g1_i1	PPA18813	P3
ppa_stranded_DN23774_c0_g2_i1	PPA18852	P3
ppa_stranded_DN29055_c0_g1_i5	PPA18945	P3
ppa_stranded_DN30220_c0_g1_i6	PPA19155	P3
ppa_stranded_DN23325_c0_g1_i3	PPA19380	P3
ppa_stranded_DN25793_c0_g1_i2	PPA19428	P3
ppa_stranded_DN25087_c0_g1_i1	PPA19589	P3
ppa_stranded_DN28795_c0_g1_i4	PPA19614	P3
ppa_stranded_DN38485_c0_g1_i1	PPA19703	P3
ppa_stranded_DN27522_c0_g2_i3	PPA19747	P3
ppa_stranded_DN27480_c2_g1_i2	PPA19920	P3
ppa_stranded_DN29210_c0_g2_i1	PPA20002	P3
ppa_stranded_DN26754_c1_g1_i1	PPA20100	P3
ppa_stranded_DN25194_c0_g1_i1	PPA20106	P3
ppa_stranded_DN31558_c3_g1_i1	PPA20180	P3
ppa_stranded_DN26258_c0_g2_i1	PPA20339	P3
ppa_stranded_DN24651_c0_g1_i1	PPA20348	P3
ppa_stranded_DN11604_c0_g1_i1	PPA20562	P3
ppa_stranded_DN19117_c0_g1_i1	PPA20624	P3
ppa_stranded_DN20781_c0_g2_i1	PPA21460	P3
ppa_stranded_DN26752_c0_g2_i3	PPA21501	P3
ppa_stranded_DN27176_c0_g2_i2	PPA21698	P3
ppa_stranded_DN44516_c0_g1_i1	PPA21817	P3
ppa_stranded_DN15345_c0_g1_i1	PPA21867	P3
ppa_stranded_DN11255_c0_g1_i1	PPA21932	P3
ppa_stranded_DN31118_c0_g9_i2	PPA22116	P3
ppa_stranded_DN19923_c0_g1_i1	PPA22337	P3
ppa_stranded_DN29756_c0_g1_i3	PPA22614	P3
ppa_stranded_DN23498_c0_g1_i2	PPA22797	P3
ppa_stranded_DN27842_c0_g1_i1	PPA23229	P3
ppa_stranded_DN28833_c0_g2_i1	PPA23240	P3
ppa_stranded_DN28152_c0_g1_i9	PPA23417	P3
ppa_stranded_DN46285_c0_g1_i1	PPA23545	P3
ppa_stranded_DN4318_c0_g1_i1	PPA23636	P3
ppa_stranded_DN26619_c0_g1_i5	PPA23840	P3
ppa_stranded_DN20393_c1_g1_i1	PPA23994	P3
ppa_stranded_DN31391_c1_g1_i4	PPA24250	P3
ppa_stranded_DN33320_c0_g1_i1	PPA24521	P3
ppa_stranded_DN18304_c0_g1_i1	PPA24773	P3
ppa_stranded_DN18852_c0_g1_i1	PPA24847	P3
ppa_stranded_DN31087_c4_g1_i1	PPA25548	P3
ppa_stranded_DN30802_c0_g1_i5	PPA25752	P3
ppa_stranded_DN28088_c0_g1_i1	PPA25785	P3
ppa_stranded_DN27832_c0_g1_i6	PPA25883	P3
ppa_stranded_DN16194_c0_g1_i1	PPA25948	P3
ppa_stranded_DN20230_c0_g1_i1	PPA25950	P3
ppa_stranded_DN24903_c0_g1_i1	PPA26006	P3
ppa_stranded_DN23698_c1_g1_i1	PPA26374	P3
ppa_stranded_DN25244_c0_g1_i1	PPA26519	P3
ppa_stranded_DN26466_c0_g1_i2	PPA26627	P3
ppa_stranded_DN29343_c0_g2_i3	PPA26699	P3
ppa_stranded_DN26065_c0_g3_i1	PPA26887	P3
ppa_stranded_DN25734_c0_g1_i2	PPA27136	P3
ppa_stranded_DN24147_c0_g1_i1	PPA27201	P3
ppa_stranded_DN30624_c0_g1_i2	PPA27575	P3
ppa_stranded_DN30789_c0_g1_i2	PPA27964	P3
ppa_stranded_DN26303_c0_g1_i3	PPA28081	P3
ppa_stranded_DN21158_c0_g2_i1	PPA28122	P3
ppa_stranded_DN23290_c0_g1_i1	PPA28629	P3
ppa_stranded_DN48231_c0_g1_i1	PPA28793	P3
ppa_stranded_DN27920_c0_g1_i3	PPA29068	P3
ppa_stranded_DN20792_c0_g1_i1	PPA29126	P3
ppa_stranded_DN27423_c0_g3_i3	PPA29170	P3
ppa_stranded_DN21175_c0_g1_i1	PPA29385	P3
ppa_stranded_DN30016_c0_g1_i1	PPA29551	P3
ppa_stranded_DN20233_c0_g1_i1	PPA29584	P3
ppa_stranded_DN28665_c0_g3_i4	PPA29744	P3
ppa_stranded_DN36904_c0_g1_i1	PPA29904	P3
ppa_stranded_DN31763_c0_g1_i1	PPA30012	P3
ppa_stranded_DN25074_c0_g2_i2	PPA30026	P3
ppa_stranded_DN37607_c0_g1_i1	PPA30036	P3
ppa_stranded_DN5063_c0_g2_i1	PPA30142	P3
ppa_stranded_DN30048_c0_g1_i1	PPA30285	P3
ppa_stranded_DN20845_c0_g1_i2	PPA30306	P3
ppa_stranded_DN31627_c0_g1_i2	PPA30358	P3
ppa_stranded_DN18316_c0_g2_i1	PPA30378	P3
ppa_stranded_DN24731_c0_g1_i1	PPA30594	P3
ppa_stranded_DN16702_c0_g1_i1	PPA32543	P3
ppa_stranded_DN26481_c0_g3_i1	PPA32819	P3
ppa_stranded_DN21417_c0_g2_i1	PPA33009	P3
ppa_stranded_DN16618_c0_g1_i2	PPA33236	P3
ppa_stranded_DN21806_c0_g1_i1	PPA33296	P3
ppa_stranded_DN19985_c0_g1_i1	PPA33386	P3
ppa_stranded_DN30716_c8_g1_i2	PPA33643	P3
ppa_stranded_DN23452_c0_g1_i1	PPA33709	P3
ppa_stranded_DN11159_c0_g1_i1	PPA33819	P3
ppa_stranded_DN30968_c0_g4_i2	PPA34596	P3
ppa_stranded_DN15759_c0_g2_i1	PPA34628	P3
ppa_stranded_DN29500_c0_g1_i6	PPA34924	P3
ppa_stranded_DN27034_c0_g1_i2	PPA35013	P3
ppa_stranded_DN24733_c1_g1_i3	PPA35128	P3
ppa_stranded_DN31505_c1_g1_i2	PPA35270	P3
ppa_stranded_DN23764_c1_g2_i1	PPA35386	P3
ppa_stranded_DN26767_c2_g1_i1	PPA35462	P3
ppa_stranded_DN31512_c3_g1_i6	PPA36423	P3
ppa_stranded_DN31842_c0_g1_i1	PPA36548	P3
ppa_stranded_DN26772_c0_g1_i2	PPA36679	P3
ppa_stranded_DN20842_c0_g1_i3	PPA36725	P3
ppa_stranded_DN26539_c0_g2_i2	PPA36898	P3
ppa_stranded_DN31580_c2_g2_i1	PPA36906	P3
ppa_stranded_DN29994_c0_g1_i4	PPA36944	P3
ppa_stranded_DN19441_c2_g1_i1	PPA37075	P3
ppa_stranded_DN31275_c1_g6_i1	PPA37212	P3
ppa_stranded_DN31248_c1_g1_i4	PPA37343	P3
ppa_stranded_DN30977_c1_g3_i1	PPA37468	P3
ppa_stranded_DN21955_c0_g1_i1	PPA37509	P3
ppa_stranded_DN25971_c0_g4_i1	PPA37516	P3
ppa_stranded_DN31133_c0_g11_i1	PPA37535	P3
ppa_stranded_DN31133_c0_g2_i1	PPA37539	P3
ppa_stranded_DN24981_c0_g1_i1	PPA37672	P3
ppa_stranded_DN21526_c0_g1_i1	PPA37714	P3
ppa_stranded_DN8944_c0_g2_i1	PPA37716	P3
ppa_stranded_DN25071_c0_g1_i1	PPA38011	P3
ppa_stranded_DN30925_c3_g2_i2	PPA38270	P3
ppa_stranded_DN24219_c0_g1_i1	PPA38462	P3
ppa_stranded_DN20147_c0_g1_i1	PPA38497	P3
ppa_stranded_DN28964_c0_g2_i1	PPA38579	P3
ppa_stranded_DN29680_c0_g1_i2	PPA38616	P3
ppa_stranded_DN27968_c0_g1_i2	PPA38684	P3
ppa_stranded_DN25822_c1_g1_i1	PPA38888	P3
ppa_stranded_DN27943_c0_g1_i1	PPA39002	P3
ppa_stranded_DN17717_c0_g1_i1	PPA39058	P3
ppa_stranded_DN25270_c0_g1_i3	PPA39259	P3
ppa_stranded_DN6833_c1_g1_i1	PPA39330	P3
ppa_stranded_DN21818_c0_g1_i1	PPA39421	P3
ppa_stranded_DN31494_c1_g8_i1	PPA39450	P3
ppa_stranded_DN30787_c0_g1_i7	PPA39478	P3
ppa_stranded_DN30356_c0_g1_i3	PPA39488	P3
ppa_stranded_DN22363_c0_g1_i2	PPA39496	P3
ppa_stranded_DN31273_c1_g1_i5	PPA39660	P3
ppa_stranded_DN31007_c1_g3_i1	PPA39775	P3
ppa_stranded_DN20915_c1_g1_i2	PPA40086	P3
ppa_stranded_DN29740_c0_g1_i7	PPA40168	P3
ppa_stranded_DN47072_c0_g1_i1	PPA41162	P3
ppa_stranded_DN22143_c0_g1_i1	PPA41737	P3
ppa_stranded_DN11730_c0_g1_i1	PPA42088	P3
ppa_stranded_DN31488_c2_g20_i1	PPA42090	P3
ppa_stranded_DN24196_c0_g1_i1	PPA42093	P3
ppa_stranded_DN26928_c1_g3_i1	PPA42214	P3
ppa_stranded_DN27194_c1_g1_i1	PPA42947	P3
ppa_stranded_DN48318_c0_g1_i1	PPA43180	P3
ppa_stranded_DN30303_c0_g1_i3	PPA43233	P3
ppa_stranded_DN30475_c1_g2_i2	PPA43282	P3
ppa_stranded_DN7979_c0_g1_i1	PPA43322	P3
ppa_stranded_DN29674_c2_g1_i2	PPA44592	P3
ppa_stranded_DN18358_c0_g1_i1	PPA45195	P3
ppa_stranded_DN27512_c0_g2_i2	PPA46378	P3
ppa_stranded_DN16741_c0_g1_i1	Contig10-snapTAU.234	P4
ppa_stranded_DN30041_c0_g1_i3	Contig23-snapTAU.204	P4
ppa_stranded_DN30826_c7_g3_i5	Contig3-snapTAU.142	P4
ppa_stranded_DN39842_c0_g1_i1	Contig42-snapTAU.77	P4
ppa_stranded_DN48021_c0_g1_i1	Contig53-snapTAU.107	P4
ppa_stranded_DN22141_c0_g3_i1	Contig8-snapTAU.426	P4
ppa_stranded_DN24767_c0_g1_i2	Iso_D.10020.4	P4
ppa_stranded_DN31352_c5_g3_i2	Iso_D.10133.1	P4
ppa_stranded_DN30557_c0_g2_i1	Iso_D.12072.3	P4
ppa_stranded_DN26213_c0_g1_i4	Iso_D.13935.1	P4
ppa_stranded_DN30867_c0_g1_i12	Iso_D.1590.1	P4
ppa_stranded_DN30966_c0_g1_i3	Iso_D.178.1	P4
ppa_stranded_DN29596_c0_g1_i1	Iso_D.223.8	P4
ppa_stranded_DN28477_c1_g2_i2	Iso_D.6086.1	P4
ppa_stranded_DN30894_c1_g3_i3	isopolya.1907.1	P4
ppa_stranded_DN16812_c0_g1_i1	ppa_stranded_DN16812_c0_g1_i1	P4
ppa_stranded_DN18133_c0_g1_i1	ppa_stranded_DN18133_c0_g1_i1	P4
ppa_stranded_DN18169_c0_g1_i1	ppa_stranded_DN18169_c0_g1_i1	P4
ppa_stranded_DN18360_c0_g1_i3	ppa_stranded_DN18360_c0_g1_i4	P4
ppa_stranded_DN36442_c0_g1_i1	ppa_stranded_DN18385_c0_g1_i1	P4
ppa_stranded_DN19286_c0_g1_i1	ppa_stranded_DN19286_c0_g1_i1	P4
ppa_stranded_DN19421_c0_g1_i1	ppa_stranded_DN19421_c0_g1_i1	P4
ppa_stranded_DN19759_c0_g2_i1	ppa_stranded_DN19759_c0_g2_i1	P4
ppa_stranded_DN19884_c0_g1_i1	ppa_stranded_DN19884_c0_g1_i3	P4
ppa_stranded_DN21209_c0_g1_i1	ppa_stranded_DN21209_c0_g1_i1	P4
ppa_stranded_DN21284_c0_g1_i3	ppa_stranded_DN21284_c0_g1_i3	P4
ppa_stranded_DN21804_c0_g1_i1	ppa_stranded_DN21804_c0_g1_i1	P4
ppa_stranded_DN22900_c0_g1_i2	ppa_stranded_DN22900_c0_g1_i1	P4
ppa_stranded_DN23027_c0_g1_i1	ppa_stranded_DN23027_c0_g1_i1	P4
ppa_stranded_DN23135_c0_g2_i1	ppa_stranded_DN23135_c0_g2_i1	P4
ppa_stranded_DN23333_c0_g2_i1	ppa_stranded_DN23333_c0_g2_i1	P4
ppa_stranded_DN23590_c0_g1_i4	ppa_stranded_DN23590_c0_g1_i1	P4
ppa_stranded_DN24019_c0_g1_i1	ppa_stranded_DN24019_c0_g1_i1	P4
ppa_stranded_DN24019_c0_g2_i1	ppa_stranded_DN24019_c0_g2_i1	P4
ppa_stranded_DN24656_c0_g2_i2	ppa_stranded_DN24656_c0_g2_i3	P4
ppa_stranded_DN24864_c0_g1_i1	ppa_stranded_DN24864_c0_g1_i1	P4
ppa_stranded_DN24871_c0_g1_i2	ppa_stranded_DN24871_c0_g1_i2	P4
ppa_stranded_DN25001_c0_g2_i1	ppa_stranded_DN25001_c0_g2_i1	P4
ppa_stranded_DN25492_c0_g3_i2	ppa_stranded_DN25492_c0_g3_i2	P4
ppa_stranded_DN25678_c0_g1_i1	ppa_stranded_DN25678_c0_g1_i1	P4
ppa_stranded_DN25698_c0_g2_i1	ppa_stranded_DN25698_c0_g2_i1	P4
ppa_stranded_DN26068_c0_g1_i2	ppa_stranded_DN26068_c0_g1_i2	P4
ppa_stranded_DN26130_c1_g1_i3	ppa_stranded_DN26130_c1_g1_i4	P4
ppa_stranded_DN26274_c0_g1_i3	ppa_stranded_DN26274_c0_g1_i4	P4
ppa_stranded_DN26368_c0_g1_i9	ppa_stranded_DN26368_c0_g1_i4	P4
ppa_stranded_DN26722_c0_g1_i1	ppa_stranded_DN26722_c0_g1_i1	P4
ppa_stranded_DN27185_c0_g2_i4	ppa_stranded_DN27185_c0_g2_i1	P4
ppa_stranded_DN27438_c0_g1_i1	ppa_stranded_DN27438_c0_g1_i2	P4
ppa_stranded_DN27683_c0_g1_i4	ppa_stranded_DN27683_c0_g1_i1	P4
ppa_stranded_DN27784_c0_g2_i4	ppa_stranded_DN27784_c0_g2_i4	P4
ppa_stranded_DN27987_c0_g1_i2	ppa_stranded_DN27987_c0_g1_i2	P4
ppa_stranded_DN28477_c1_g4_i1	ppa_stranded_DN28477_c0_g2_i1	P4
ppa_stranded_DN28753_c0_g2_i2	ppa_stranded_DN28753_c0_g2_i1	P4
ppa_stranded_DN28809_c0_g2_i1	ppa_stranded_DN28809_c0_g2_i1	P4
ppa_stranded_DN29390_c1_g3_i11	ppa_stranded_DN29390_c1_g3_i14	P4
ppa_stranded_DN29527_c0_g1_i8	ppa_stranded_DN29527_c0_g1_i7	P4
ppa_stranded_DN29569_c0_g2_i3	ppa_stranded_DN29569_c0_g2_i3	P4
ppa_stranded_DN29592_c0_g1_i6	ppa_stranded_DN29592_c0_g1_i2	P4
ppa_stranded_DN29594_c0_g2_i4	ppa_stranded_DN29594_c0_g2_i2	P4
ppa_stranded_DN29774_c1_g3_i4	ppa_stranded_DN29774_c1_g3_i3	P4
ppa_stranded_DN29928_c0_g2_i2	ppa_stranded_DN29928_c0_g2_i1	P4
ppa_stranded_DN30022_c0_g3_i2	ppa_stranded_DN30022_c0_g3_i8	P4
ppa_stranded_DN30092_c0_g4_i1	ppa_stranded_DN30092_c0_g4_i1	P4
ppa_stranded_DN30123_c0_g1_i5	ppa_stranded_DN30123_c0_g1_i5	P4
ppa_stranded_DN30254_c1_g1_i4	ppa_stranded_DN30254_c1_g1_i6	P4
ppa_stranded_DN30384_c0_g2_i8	ppa_stranded_DN30384_c0_g2_i4	P4
ppa_stranded_DN30541_c5_g2_i1	ppa_stranded_DN30541_c5_g2_i1	P4
ppa_stranded_DN30570_c2_g1_i2	ppa_stranded_DN30570_c2_g1_i2	P4
ppa_stranded_DN30628_c0_g1_i5	ppa_stranded_DN30628_c0_g1_i2	P4
ppa_stranded_DN30655_c0_g1_i1	ppa_stranded_DN30655_c0_g1_i1	P4
ppa_stranded_DN30666_c4_g6_i1	ppa_stranded_DN30666_c4_g6_i1	P4
ppa_stranded_DN30729_c0_g3_i1	ppa_stranded_DN30729_c0_g3_i3	P4
ppa_stranded_DN31006_c0_g1_i7	ppa_stranded_DN31006_c0_g1_i8	P4
ppa_stranded_DN31074_c0_g1_i3	ppa_stranded_DN31074_c0_g1_i1	P4
ppa_stranded_DN31107_c0_g1_i2	ppa_stranded_DN31107_c0_g1_i2	P4
ppa_stranded_DN31291_c3_g5_i2	ppa_stranded_DN31291_c3_g5_i5	P4
ppa_stranded_DN31305_c1_g1_i3	ppa_stranded_DN31305_c1_g1_i3	P4
ppa_stranded_DN31696_c2_g6_i2	ppa_stranded_DN31696_c2_g6_i1	P4
ppa_stranded_DN7884_c0_g1_i1	ppa_stranded_DN7884_c0_g1_i1	P4
ppa_stranded_DN21055_c0_g1_i2	PPA00315	P4
ppa_stranded_DN19441_c0_g1_i1	PPA00357	P4
ppa_stranded_DN28078_c0_g1_i2	PPA00516	P4
ppa_stranded_DN17192_c0_g1_i1	PPA00693	P4
ppa_stranded_DN16534_c0_g1_i1	PPA00804	P4
ppa_stranded_DN26706_c0_g1_i2	PPA00907	P4
ppa_stranded_DN21390_c1_g1_i1	PPA01187	P4
ppa_stranded_DN7689_c0_g2_i1	PPA01212	P4
ppa_stranded_DN27262_c1_g2_i2	PPA01278	P4
ppa_stranded_DN27039_c0_g1_i1	PPA01325	P4
ppa_stranded_DN19664_c0_g1_i1	PPA02097	P4
ppa_stranded_DN8869_c0_g1_i1	PPA02431	P4
ppa_stranded_DN50060_c0_g1_i1	PPA02705	P4
ppa_stranded_DN28012_c1_g2_i3	PPA02985	P4
ppa_stranded_DN30758_c0_g1_i2	PPA03540	P4
ppa_stranded_DN28638_c2_g1_i2	PPA04120	P4
ppa_stranded_DN4082_c0_g1_i1	PPA04281	P4
ppa_stranded_DN29912_c0_g1_i3	PPA04672	P4
ppa_stranded_DN28879_c0_g2_i1	PPA05136	P4
ppa_stranded_DN29656_c0_g1_i2	PPA05183	P4
ppa_stranded_DN29632_c0_g2_i2	PPA05185	P4
ppa_stranded_DN31615_c4_g2_i1	PPA05324	P4
ppa_stranded_DN30143_c1_g4_i1	PPA05325	P4
ppa_stranded_DN28980_c0_g1_i1	PPA05672	P4
ppa_stranded_DN29000_c0_g1_i4	PPA05773	P4
ppa_stranded_DN16524_c0_g1_i1	PPA05846	P4
ppa_stranded_DN3717_c0_g2_i1	PPA07794	P4
ppa_stranded_DN22532_c0_g1_i1	PPA07913	P4
ppa_stranded_DN30732_c7_g8_i1	PPA08345	P4
ppa_stranded_DN24472_c0_g1_i1	PPA08458	P4
ppa_stranded_DN31145_c2_g3_i2	PPA08725	P4
ppa_stranded_DN30493_c4_g3_i1	PPA08811	P4
ppa_stranded_DN16927_c0_g1_i3	PPA09205	P4
ppa_stranded_DN18417_c0_g1_i1	PPA09212	P4
ppa_stranded_DN29101_c0_g1_i3	PPA09214	P4
ppa_stranded_DN22483_c0_g1_i2	PPA09793	P4
ppa_stranded_DN28902_c0_g2_i1	PPA09811	P4
ppa_stranded_DN24748_c0_g1_i1	PPA09826	P4
ppa_stranded_DN44331_c0_g1_i1	PPA09827	P4
ppa_stranded_DN24742_c0_g1_i2	PPA09834	P4
ppa_stranded_DN31553_c1_g2_i17	PPA09879	P4
ppa_stranded_DN21657_c0_g2_i1	PPA10030	P4
ppa_stranded_DN27012_c0_g1_i1	PPA10903	P4
ppa_stranded_DN31532_c9_g1_i1	PPA11073	P4
ppa_stranded_DN21732_c0_g2_i1	PPA11598	P4
ppa_stranded_DN24396_c0_g2_i1	PPA11863	P4
ppa_stranded_DN27747_c0_g2_i3	PPA12315	P4
ppa_stranded_DN19095_c0_g2_i2	PPA12572	P4
ppa_stranded_DN23366_c0_g1_i1	PPA12732	P4
ppa_stranded_DN26054_c1_g1_i2	PPA12936	P4
ppa_stranded_DN24495_c0_g1_i1	PPA13040	P4
ppa_stranded_DN31703_c9_g2_i1	PPA13553	P4
ppa_stranded_DN22733_c0_g1_i2	PPA14150	P4
ppa_stranded_DN30707_c1_g1_i4	PPA15131	P4
ppa_stranded_DN26484_c0_g2_i2	PPA15954	P4
ppa_stranded_DN29023_c0_g1_i4	PPA15988	P4
ppa_stranded_DN30949_c0_g1_i4	PPA16443	P4
ppa_stranded_DN28383_c0_g2_i4	PPA16489	P4
ppa_stranded_DN27192_c1_g2_i1	PPA16538	P4
ppa_stranded_DN28809_c0_g3_i1	PPA16672	P4
ppa_stranded_DN31096_c0_g3_i2	PPA16940	P4
ppa_stranded_DN26703_c0_g1_i2	PPA17228	P4
ppa_stranded_DN30233_c0_g1_i1	PPA17241	P4
ppa_stranded_DN15479_c0_g1_i1	PPA17487	P4
ppa_stranded_DN28371_c1_g1_i1	PPA18463	P4
ppa_stranded_DN22283_c0_g1_i1	PPA18734	P4
ppa_stranded_DN28728_c0_g2_i1	PPA19597	P4
ppa_stranded_DN27194_c0_g1_i1	PPA20319	P4
ppa_stranded_DN44070_c0_g1_i1	PPA20393	P4
ppa_stranded_DN26509_c0_g2_i1	PPA20867	P4
ppa_stranded_DN27192_c0_g1_i1	PPA20882	P4
ppa_stranded_DN28476_c0_g1_i2	PPA21382	P4
ppa_stranded_DN24824_c0_g2_i2	PPA21452	P4
ppa_stranded_DN23401_c0_g1_i1	PPA21615	P4
ppa_stranded_DN25934_c0_g1_i8	PPA21740	P4
ppa_stranded_DN26460_c0_g1_i3	PPA21784	P4
ppa_stranded_DN23777_c0_g1_i2	PPA22024	P4
ppa_stranded_DN25701_c0_g1_i5	PPA22628	P4
ppa_stranded_DN31166_c0_g5_i1	PPA22790	P4
ppa_stranded_DN31234_c1_g2_i2	PPA23565	P4
ppa_stranded_DN26597_c0_g2_i1	PPA23573	P4
ppa_stranded_DN21138_c0_g1_i3	PPA23979	P4
ppa_stranded_DN28775_c1_g1_i2	PPA24098	P4
ppa_stranded_DN28763_c0_g1_i1	PPA24414	P4
ppa_stranded_DN22697_c0_g1_i2	PPA25310	P4
ppa_stranded_DN26933_c0_g1_i3	PPA25520	P4
ppa_stranded_DN30949_c0_g3_i4	PPA25827	P4
ppa_stranded_DN16690_c0_g1_i1	PPA26632	P4
ppa_stranded_DN22069_c0_g1_i1	PPA26819	P4
ppa_stranded_DN20494_c0_g1_i1	PPA27039	P4
ppa_stranded_DN26532_c0_g1_i1	PPA27070	P4
ppa_stranded_DN26666_c0_g1_i4	PPA27306	P4
ppa_stranded_DN20289_c0_g1_i1	PPA27513	P4
ppa_stranded_DN27554_c0_g1_i2	PPA27825	P4
ppa_stranded_DN31427_c6_g2_i2	PPA28646	P4
ppa_stranded_DN27275_c0_g1_i2	PPA29077	P4
ppa_stranded_DN23796_c0_g1_i1	PPA29222	P4
ppa_stranded_DN27863_c0_g1_i1	PPA29814	P4
ppa_stranded_DN16225_c0_g1_i1	PPA31591	P4
ppa_stranded_DN27238_c0_g1_i2	PPA33279	P4
ppa_stranded_DN20711_c0_g1_i1	PPA33845	P4
ppa_stranded_DN31003_c0_g3_i1	PPA34078	P4
ppa_stranded_DN31138_c12_g8_i3	PPA34198	P4
ppa_stranded_DN23510_c0_g1_i1	PPA34684	P4
ppa_stranded_DN23560_c0_g1_i2	PPA35331	P4
ppa_stranded_DN599_c0_g1_i1	PPA35387	P4
ppa_stranded_DN30814_c2_g7_i8	PPA35818	P4
ppa_stranded_DN18032_c0_g1_i1	PPA36041	P4
ppa_stranded_DN22485_c0_g1_i2	PPA36126	P4
ppa_stranded_DN31467_c5_g1_i6	PPA36542	P4
ppa_stranded_DN223_c0_g1_i1	PPA36768	P4
ppa_stranded_DN27117_c0_g2_i1	PPA36930	P4
ppa_stranded_DN29850_c0_g4_i1	PPA36958	P4
ppa_stranded_DN27836_c0_g1_i2	PPA37386	P4
ppa_stranded_DN23049_c1_g1_i1	PPA37558	P4
ppa_stranded_DN30928_c0_g2_i6	PPA37927	P4
ppa_stranded_DN31166_c0_g13_i1	PPA38112	P4
ppa_stranded_DN30179_c0_g2_i2	PPA38859	P4
ppa_stranded_DN28324_c1_g1_i3	PPA38981	P4
ppa_stranded_DN31212_c0_g2_i2	PPA39286	P4
ppa_stranded_DN26859_c0_g2_i2	PPA39801	P4
ppa_stranded_DN30966_c0_g4_i1	PPA40229	P4
ppa_stranded_DN30563_c4_g1_i1	PPA40709	P4
ppa_stranded_DN30828_c1_g1_i1	PPA40718	P4
ppa_stranded_DN23981_c0_g2_i1	PPA40797	P4
ppa_stranded_DN30814_c2_g5_i5	PPA41370	P4
ppa_stranded_DN31345_c0_g1_i1	PPA42064	P4
ppa_stranded_DN19499_c1_g1_i1	PPA42119	P4
ppa_stranded_DN28621_c0_g2_i3	PPA42124	P4
ppa_stranded_DN21008_c0_g1_i1	PPA42568	P4
ppa_stranded_DN30908_c0_g2_i1	PPA43391	P4
ppa_stranded_DN26801_c0_g1_i1	PPA45637	P4
ppa_stranded_DN29968_c1_g1_i1	Contig125-snapTAU.61	P5
ppa_stranded_DN31060_c4_g1_i7	Contig26-snapTAU.116	P5
ppa_stranded_DN31271_c3_g1_i5	Contig33-snapTAU.36	P5
ppa_stranded_DN22694_c0_g1_i1	Contig56-snapTAU.105	P5
ppa_stranded_DN24773_c0_g2_i1	Contig7-snapTAU.149	P5
ppa_stranded_DN26416_c0_g1_i2	Contig9-snapTAU.38	P5
ppa_stranded_DN27521_c0_g1_i1	Iso_D.10968.1	P5
ppa_stranded_DN30873_c0_g2_i6	Iso_D.12886.1	P5
ppa_stranded_DN26446_c2_g1_i1	Iso_D.12940.1	P5
ppa_stranded_DN31352_c5_g2_i1	Iso_D.13448.1	P5
ppa_stranded_DN21803_c0_g1_i1	Iso_D.14899.1	P5
ppa_stranded_DN30817_c0_g1_i3	Iso_D.2907.1	P5
ppa_stranded_DN20744_c0_g1_i1	Iso_D.6199.1	P5
ppa_stranded_DN35897_c0_g1_i1	Iso_D.6972.1	P5
ppa_stranded_DN22728_c0_g1_i1	Iso_D.7059.1	P5
ppa_stranded_DN24804_c0_g1_i1	Iso_D.722.1	P5
ppa_stranded_DN30525_c0_g3_i8	Iso_D.7792.1	P5
ppa_stranded_DN30424_c2_g1_i1	Iso_D.8499.1	P5
ppa_stranded_DN30960_c7_g4_i2	Iso_D.8860.1	P5
ppa_stranded_DN28117_c1_g1_i2	isototal.2129.1	P5
ppa_stranded_DN10266_c0_g1_i1	ppa_stranded_DN10266_c0_g1_i1	P5
ppa_stranded_DN10470_c0_g1_i1	ppa_stranded_DN10470_c0_g1_i1	P5
ppa_stranded_DN10524_c0_g1_i1	ppa_stranded_DN10524_c0_g1_i1	P5
ppa_stranded_DN11105_c0_g1_i1	ppa_stranded_DN11105_c0_g1_i1	P5
ppa_stranded_DN15547_c0_g1_i1	ppa_stranded_DN15547_c0_g1_i1	P5
ppa_stranded_DN15748_c0_g1_i1	ppa_stranded_DN15748_c0_g1_i1	P5
ppa_stranded_DN16139_c0_g1_i1	ppa_stranded_DN16139_c0_g1_i1	P5
ppa_stranded_DN18017_c0_g1_i1	ppa_stranded_DN18017_c0_g1_i1	P5
ppa_stranded_DN18461_c0_g1_i1	ppa_stranded_DN18461_c0_g1_i1	P5
ppa_stranded_DN19731_c0_g1_i1	ppa_stranded_DN19731_c0_g1_i1	P5
ppa_stranded_DN20282_c0_g1_i1	ppa_stranded_DN20282_c0_g1_i1	P5
ppa_stranded_DN20484_c0_g1_i1	ppa_stranded_DN20484_c0_g1_i1	P5
ppa_stranded_DN21038_c0_g1_i1	ppa_stranded_DN21038_c0_g1_i1	P5
ppa_stranded_DN21099_c0_g1_i2	ppa_stranded_DN21099_c0_g1_i2	P5
ppa_stranded_DN21258_c0_g1_i1	ppa_stranded_DN21258_c0_g1_i1	P5
ppa_stranded_DN21471_c0_g1_i1	ppa_stranded_DN21471_c0_g1_i1	P5
ppa_stranded_DN21715_c0_g1_i1	ppa_stranded_DN21715_c0_g1_i2	P5
ppa_stranded_DN21960_c0_g1_i1	ppa_stranded_DN21960_c0_g1_i1	P5
ppa_stranded_DN27281_c0_g2_i1	ppa_stranded_DN22481_c0_g1_i1	P5
ppa_stranded_DN22538_c0_g1_i2	ppa_stranded_DN22538_c0_g1_i2	P5
ppa_stranded_DN23096_c0_g1_i1	ppa_stranded_DN23096_c0_g1_i2	P5
ppa_stranded_DN23407_c0_g1_i1	ppa_stranded_DN23407_c0_g1_i1	P5
ppa_stranded_DN23423_c0_g1_i2	ppa_stranded_DN23423_c0_g1_i2	P5
ppa_stranded_DN23482_c0_g1_i1	ppa_stranded_DN23482_c0_g1_i1	P5
ppa_stranded_DN23521_c0_g1_i1	ppa_stranded_DN23521_c0_g1_i1	P5
ppa_stranded_DN23565_c0_g1_i3	ppa_stranded_DN23565_c0_g1_i2	P5
ppa_stranded_DN23683_c1_g2_i2	ppa_stranded_DN23683_c1_g2_i1	P5
ppa_stranded_DN23687_c0_g1_i2	ppa_stranded_DN23687_c0_g1_i2	P5
ppa_stranded_DN23734_c0_g1_i1	ppa_stranded_DN23734_c0_g1_i1	P5
ppa_stranded_DN24039_c0_g1_i1	ppa_stranded_DN24039_c0_g1_i1	P5
ppa_stranded_DN24089_c0_g2_i3	ppa_stranded_DN24089_c0_g2_i3	P5
ppa_stranded_DN24168_c0_g1_i2	ppa_stranded_DN24168_c0_g1_i2	P5
ppa_stranded_DN20501_c0_g1_i1	ppa_stranded_DN24721_c0_g2_i1	P5
ppa_stranded_DN25047_c0_g1_i1	ppa_stranded_DN25047_c0_g1_i1	P5
ppa_stranded_DN25292_c0_g1_i2	ppa_stranded_DN25292_c0_g1_i1	P5
ppa_stranded_DN25312_c1_g1_i1	ppa_stranded_DN25312_c1_g1_i1	P5
ppa_stranded_DN25400_c0_g1_i1	ppa_stranded_DN25400_c0_g1_i1	P5
ppa_stranded_DN25582_c0_g1_i1	ppa_stranded_DN25582_c0_g1_i1	P5
ppa_stranded_DN25658_c0_g1_i2	ppa_stranded_DN25658_c0_g1_i3	P5
ppa_stranded_DN25680_c1_g1_i1	ppa_stranded_DN25680_c1_g1_i1	P5
ppa_stranded_DN25825_c0_g1_i1	ppa_stranded_DN25825_c0_g1_i1	P5
ppa_stranded_DN25946_c0_g1_i2	ppa_stranded_DN25946_c0_g1_i2	P5
ppa_stranded_DN26079_c0_g1_i1	ppa_stranded_DN26079_c0_g1_i1	P5
ppa_stranded_DN26206_c0_g1_i1	ppa_stranded_DN26206_c0_g1_i2	P5
ppa_stranded_DN26424_c0_g1_i1	ppa_stranded_DN26424_c0_g2_i1	P5
ppa_stranded_DN26485_c0_g1_i2	ppa_stranded_DN26485_c0_g1_i2	P5
ppa_stranded_DN26608_c0_g1_i1	ppa_stranded_DN26608_c0_g1_i1	P5
ppa_stranded_DN26714_c1_g1_i2	ppa_stranded_DN26714_c1_g1_i2	P5
ppa_stranded_DN26793_c0_g3_i2	ppa_stranded_DN26793_c0_g3_i2	P5
ppa_stranded_DN26900_c0_g1_i1	ppa_stranded_DN26900_c0_g1_i1	P5
ppa_stranded_DN27090_c0_g1_i1	ppa_stranded_DN27090_c0_g1_i1	P5
ppa_stranded_DN27383_c1_g1_i6	ppa_stranded_DN27383_c1_g1_i5	P5
ppa_stranded_DN27620_c2_g3_i1	ppa_stranded_DN27620_c2_g2_i3	P5
ppa_stranded_DN27881_c0_g2_i2	ppa_stranded_DN27881_c0_g2_i2	P5
ppa_stranded_DN27907_c0_g1_i1	ppa_stranded_DN27907_c0_g1_i2	P5
ppa_stranded_DN28002_c0_g1_i1	ppa_stranded_DN28002_c0_g1_i1	P5
ppa_stranded_DN28165_c0_g1_i1	ppa_stranded_DN28165_c0_g1_i1	P5
ppa_stranded_DN28376_c0_g1_i1	ppa_stranded_DN28376_c0_g1_i1	P5
ppa_stranded_DN28490_c0_g1_i5	ppa_stranded_DN28490_c0_g1_i4	P5
ppa_stranded_DN28497_c0_g2_i3	ppa_stranded_DN28497_c0_g2_i3	P5
ppa_stranded_DN28520_c0_g1_i1	ppa_stranded_DN28520_c0_g1_i1	P5
ppa_stranded_DN28562_c0_g3_i1	ppa_stranded_DN28562_c0_g3_i2	P5
ppa_stranded_DN28707_c0_g1_i3	ppa_stranded_DN28707_c0_g1_i4	P5
ppa_stranded_DN28800_c0_g1_i1	ppa_stranded_DN28800_c0_g1_i1	P5
ppa_stranded_DN28814_c0_g1_i1	ppa_stranded_DN28814_c0_g1_i2	P5
ppa_stranded_DN28873_c0_g1_i2	ppa_stranded_DN28873_c0_g1_i1	P5
ppa_stranded_DN29036_c0_g1_i2	ppa_stranded_DN29036_c0_g1_i1	P5
ppa_stranded_DN29072_c3_g1_i1	ppa_stranded_DN29072_c3_g1_i1	P5
ppa_stranded_DN29168_c1_g1_i2	ppa_stranded_DN29168_c1_g1_i2	P5
ppa_stranded_DN29522_c0_g1_i3	ppa_stranded_DN29522_c0_g1_i2	P5
ppa_stranded_DN29741_c2_g2_i1	ppa_stranded_DN29741_c2_g2_i1	P5
ppa_stranded_DN29764_c1_g2_i2	ppa_stranded_DN29764_c1_g2_i2	P5
ppa_stranded_DN29788_c3_g1_i1	ppa_stranded_DN29788_c3_g1_i1	P5
ppa_stranded_DN29811_c1_g1_i1	ppa_stranded_DN29811_c1_g1_i1	P5
ppa_stranded_DN30107_c0_g3_i2	ppa_stranded_DN30107_c0_g3_i2	P5
ppa_stranded_DN30218_c1_g1_i5	ppa_stranded_DN30218_c1_g1_i5	P5
ppa_stranded_DN30353_c0_g1_i1	ppa_stranded_DN30353_c0_g1_i1	P5
ppa_stranded_DN30377_c1_g1_i3	ppa_stranded_DN30377_c1_g1_i3	P5
ppa_stranded_DN30418_c0_g1_i5	ppa_stranded_DN30418_c0_g1_i3	P5
ppa_stranded_DN30435_c0_g1_i1	ppa_stranded_DN30435_c0_g1_i1	P5
ppa_stranded_DN30439_c0_g1_i1	ppa_stranded_DN30439_c0_g1_i1	P5
ppa_stranded_DN30464_c0_g1_i1	ppa_stranded_DN30464_c0_g1_i2	P5
ppa_stranded_DN30503_c0_g1_i6	ppa_stranded_DN30503_c0_g1_i5	P5
ppa_stranded_DN30659_c2_g2_i3	ppa_stranded_DN30659_c2_g2_i1	P5
ppa_stranded_DN30685_c1_g2_i5	ppa_stranded_DN30685_c1_g2_i1	P5
ppa_stranded_DN30958_c3_g7_i5	ppa_stranded_DN30958_c3_g7_i8	P5
ppa_stranded_DN30965_c9_g2_i1	ppa_stranded_DN30965_c9_g2_i1	P5
ppa_stranded_DN31054_c3_g2_i2	ppa_stranded_DN31054_c3_g2_i2	P5
ppa_stranded_DN31054_c3_g3_i1	ppa_stranded_DN31054_c3_g3_i1	P5
ppa_stranded_DN31056_c1_g1_i3	ppa_stranded_DN31056_c1_g1_i7	P5
ppa_stranded_DN31128_c2_g1_i4	ppa_stranded_DN31128_c2_g1_i4	P5
ppa_stranded_DN31142_c4_g1_i1	ppa_stranded_DN31142_c4_g1_i1	P5
ppa_stranded_DN31224_c1_g1_i6	ppa_stranded_DN31224_c1_g1_i6	P5
ppa_stranded_DN31242_c1_g3_i1	ppa_stranded_DN31242_c1_g3_i1	P5
ppa_stranded_DN31308_c3_g5_i1	ppa_stranded_DN31308_c3_g5_i1	P5
ppa_stranded_DN31308_c3_g7_i4	ppa_stranded_DN31308_c3_g7_i2	P5
ppa_stranded_DN31325_c0_g1_i6	ppa_stranded_DN31325_c0_g1_i6	P5
ppa_stranded_DN31368_c0_g6_i5	ppa_stranded_DN31368_c0_g5_i5	P5
ppa_stranded_DN31383_c0_g1_i8	ppa_stranded_DN31383_c0_g1_i7	P5
ppa_stranded_DN31445_c0_g1_i1	ppa_stranded_DN31445_c0_g1_i2	P5
ppa_stranded_DN31487_c3_g2_i4	ppa_stranded_DN31487_c3_g2_i5	P5
ppa_stranded_DN32554_c0_g1_i1	ppa_stranded_DN32554_c0_g1_i1	P5
ppa_stranded_DN37409_c0_g1_i1	ppa_stranded_DN37409_c0_g1_i1	P5
ppa_stranded_DN41777_c0_g1_i1	ppa_stranded_DN41777_c0_g1_i1	P5
ppa_stranded_DN48361_c0_g1_i1	ppa_stranded_DN48361_c0_g1_i1	P5
ppa_stranded_DN48398_c0_g1_i1	ppa_stranded_DN48398_c0_g1_i1	P5
ppa_stranded_DN48781_c0_g1_i1	ppa_stranded_DN48781_c0_g1_i1	P5
ppa_stranded_DN49074_c0_g1_i1	ppa_stranded_DN49074_c0_g1_i1	P5
ppa_stranded_DN7797_c0_g1_i1	ppa_stranded_DN7797_c0_g1_i1	P5
ppa_stranded_DN9423_c0_g1_i1	ppa_stranded_DN9423_c0_g1_i1	P5
ppa_stranded_DN9769_c0_g1_i1	ppa_stranded_DN9769_c0_g1_i1	P5
ppa_stranded_DN29888_c0_g1_i1	PPA00088	P5
ppa_stranded_DN28837_c0_g1_i2	PPA00561	P5
ppa_stranded_DN26583_c0_g1_i2	PPA00596	P5
ppa_stranded_DN22438_c0_g1_i1	PPA00604	P5
ppa_stranded_DN34002_c0_g1_i1	PPA00642	P5
ppa_stranded_DN24987_c0_g1_i1	PPA00698	P5
ppa_stranded_DN12629_c0_g1_i1	PPA00726	P5
ppa_stranded_DN8738_c0_g1_i1	PPA00941	P5
ppa_stranded_DN31590_c1_g12_i5	PPA01029	P5
ppa_stranded_DN33762_c0_g1_i1	PPA01155	P5
ppa_stranded_DN33446_c0_g1_i1	PPA01221	P5
ppa_stranded_DN18040_c0_g1_i2	PPA01585	P5
ppa_stranded_DN44187_c0_g1_i1	PPA01663	P5
ppa_stranded_DN24919_c0_g1_i1	PPA01805	P5
ppa_stranded_DN21564_c0_g1_i1	PPA01847	P5
ppa_stranded_DN18101_c0_g1_i1	PPA02179	P5
ppa_stranded_DN7682_c0_g1_i1	PPA02310	P5
ppa_stranded_DN31142_c3_g2_i7	PPA02482	P5
ppa_stranded_DN23931_c0_g2_i1	PPA02645	P5
ppa_stranded_DN28064_c0_g1_i2	PPA02823	P5
ppa_stranded_DN27743_c1_g2_i1	PPA02892	P5
ppa_stranded_DN25451_c0_g1_i1	PPA02900	P5
ppa_stranded_DN8229_c0_g1_i1	PPA03138	P5
ppa_stranded_DN33060_c0_g1_i1	PPA03206	P5
ppa_stranded_DN27049_c0_g1_i2	PPA03538	P5
ppa_stranded_DN18759_c0_g1_i1	PPA04097	P5
ppa_stranded_DN32928_c0_g1_i1	PPA04642	P5
ppa_stranded_DN28593_c0_g1_i1	PPA04711	P5
ppa_stranded_DN30716_c4_g1_i2	PPA05161	P5
ppa_stranded_DN2308_c0_g1_i1	PPA05378	P5
ppa_stranded_DN26124_c0_g2_i1	PPA05745	P5
ppa_stranded_DN14765_c0_g1_i1	PPA05748	P5
ppa_stranded_DN23789_c0_g1_i1	PPA05750	P5
ppa_stranded_DN37643_c0_g1_i1	PPA06208	P5
ppa_stranded_DN17347_c0_g2_i1	PPA06287	P5
ppa_stranded_DN21238_c0_g1_i1	PPA06338	P5
ppa_stranded_DN28703_c0_g2_i1	PPA06500	P5
ppa_stranded_DN23473_c0_g1_i1	PPA06548	P5
ppa_stranded_DN30349_c1_g1_i2	PPA06575	P5
ppa_stranded_DN18602_c0_g1_i1	PPA06697	P5
ppa_stranded_DN27543_c0_g2_i1	PPA06738	P5
ppa_stranded_DN31099_c0_g2_i2	PPA06786	P5
ppa_stranded_DN24773_c0_g1_i1	PPA06788	P5
ppa_stranded_DN18211_c0_g1_i1	PPA06873	P5
ppa_stranded_DN28460_c0_g2_i1	PPA06940	P5
ppa_stranded_DN17367_c0_g1_i1	PPA07023	P5
ppa_stranded_DN24770_c0_g1_i1	PPA07055	P5
ppa_stranded_DN11552_c0_g1_i1	PPA07105	P5
ppa_stranded_DN20321_c0_g2_i1	PPA07106	P5
ppa_stranded_DN47130_c0_g1_i1	PPA07383	P5
ppa_stranded_DN24514_c0_g1_i1	PPA07469	P5
ppa_stranded_DN27883_c2_g1_i1	PPA07620	P5
ppa_stranded_DN5318_c0_g2_i1	PPA07691	P5
ppa_stranded_DN31169_c0_g1_i1	PPA07740	P5
ppa_stranded_DN22384_c0_g3_i1	PPA07791	P5
ppa_stranded_DN18790_c0_g1_i1	PPA07821	P5
ppa_stranded_DN28497_c0_g1_i1	PPA07905	P5
ppa_stranded_DN18289_c0_g1_i1	PPA08068	P5
ppa_stranded_DN31401_c0_g1_i6	PPA08156	P5
ppa_stranded_DN25693_c0_g1_i2	PPA08182	P5
ppa_stranded_DN36668_c0_g1_i1	PPA08205	P5
ppa_stranded_DN25881_c0_g1_i1	PPA08235	P5
ppa_stranded_DN23942_c0_g1_i2	PPA08437	P5
ppa_stranded_DN28081_c0_g1_i3	PPA08535	P5
ppa_stranded_DN19100_c0_g1_i1	PPA08556	P5
ppa_stranded_DN30841_c0_g1_i9	PPA08559	P5
ppa_stranded_DN15482_c0_g1_i1	PPA08735	P5
ppa_stranded_DN31546_c0_g1_i1	PPA09023	P5
ppa_stranded_DN11863_c0_g2_i1	PPA09156	P5
ppa_stranded_DN24072_c1_g1_i1	PPA09175	P5
ppa_stranded_DN43832_c0_g1_i1	PPA09312	P5
ppa_stranded_DN17286_c0_g1_i1	PPA09330	P5
ppa_stranded_DN16329_c0_g1_i1	PPA09342	P5
ppa_stranded_DN28400_c0_g1_i1	PPA09495	P5
ppa_stranded_DN48482_c0_g1_i1	PPA09573	P5
ppa_stranded_DN29612_c0_g1_i1	PPA09718	P5
ppa_stranded_DN30344_c0_g1_i1	PPA09747	P5
ppa_stranded_DN23119_c0_g2_i3	PPA09749	P5
ppa_stranded_DN31243_c1_g1_i1	PPA09757	P5
ppa_stranded_DN26500_c0_g2_i1	PPA09807	P5
ppa_stranded_DN24654_c0_g1_i1	PPA09872	P5
ppa_stranded_DN26670_c0_g1_i3	PPA10322	P5
ppa_stranded_DN30844_c0_g1_i1	PPA10399	P5
ppa_stranded_DN39904_c0_g1_i1	PPA10631	P5
ppa_stranded_DN20024_c0_g1_i2	PPA10730	P5
ppa_stranded_DN18939_c0_g1_i1	PPA11220	P5
ppa_stranded_DN29743_c0_g1_i1	PPA11269	P5
ppa_stranded_DN23171_c0_g1_i1	PPA11509	P5
ppa_stranded_DN28789_c0_g1_i2	PPA11603	P5
ppa_stranded_DN29424_c0_g2_i1	PPA12072	P5
ppa_stranded_DN25784_c0_g1_i2	PPA12171	P5
ppa_stranded_DN28787_c0_g2_i7	PPA12314	P5
ppa_stranded_DN20949_c0_g1_i1	PPA12550	P5
ppa_stranded_DN30675_c0_g1_i1	PPA12568	P5
ppa_stranded_DN36840_c0_g1_i1	PPA12728	P5
ppa_stranded_DN26753_c0_g1_i3	PPA12738	P5
ppa_stranded_DN22549_c0_g1_i1	PPA12815	P5
ppa_stranded_DN23050_c0_g1_i3	PPA12859	P5
ppa_stranded_DN16833_c0_g1_i1	PPA12865	P5
ppa_stranded_DN22090_c0_g1_i1	PPA13031	P5
ppa_stranded_DN26394_c1_g2_i1	PPA13216	P5
ppa_stranded_DN29505_c0_g1_i1	PPA13734	P5
ppa_stranded_DN20033_c0_g1_i1	PPA13760	P5
ppa_stranded_DN21554_c0_g1_i2	PPA13797	P5
ppa_stranded_DN4177_c0_g1_i1	PPA14017	P5
ppa_stranded_DN25033_c1_g1_i4	PPA14141	P5
ppa_stranded_DN25230_c0_g1_i2	PPA14190	P5
ppa_stranded_DN18628_c0_g1_i1	PPA14205	P5
ppa_stranded_DN18739_c0_g1_i4	PPA14218	P5
ppa_stranded_DN17545_c0_g1_i1	PPA14235	P5
ppa_stranded_DN26487_c0_g2_i1	PPA14502	P5
ppa_stranded_DN25423_c0_g1_i1	PPA14572	P5
ppa_stranded_DN11908_c0_g1_i1	PPA14748	P5
ppa_stranded_DN30443_c0_g1_i1	PPA15034	P5
ppa_stranded_DN27915_c0_g1_i1	PPA15303	P5
ppa_stranded_DN27883_c1_g1_i1	PPA15419	P5
ppa_stranded_DN27828_c1_g2_i1	PPA16411	P5
ppa_stranded_DN36654_c0_g1_i1	PPA16491	P5
ppa_stranded_DN31117_c7_g4_i1	PPA16664	P5
ppa_stranded_DN22089_c0_g1_i1	PPA16815	P5
ppa_stranded_DN25538_c0_g1_i2	PPA17103	P5
ppa_stranded_DN21058_c0_g1_i2	PPA17128	P5
ppa_stranded_DN44905_c0_g1_i1	PPA17201	P5
ppa_stranded_DN26957_c0_g1_i1	PPA17238	P5
ppa_stranded_DN25638_c0_g2_i1	PPA17320	P5
ppa_stranded_DN26879_c0_g1_i1	PPA17348	P5
ppa_stranded_DN19895_c0_g1_i2	PPA17541	P5
ppa_stranded_DN16057_c0_g1_i1	PPA17698	P5
ppa_stranded_DN30740_c0_g1_i5	PPA17884	P5
ppa_stranded_DN19211_c0_g1_i1	PPA18021	P5
ppa_stranded_DN30295_c0_g2_i1	PPA18180	P5
ppa_stranded_DN27771_c0_g2_i1	PPA18409	P5
ppa_stranded_DN9172_c0_g1_i1	PPA18415	P5
ppa_stranded_DN25705_c0_g1_i1	PPA18507	P5
ppa_stranded_DN29159_c2_g4_i1	PPA19043	P5
ppa_stranded_DN27944_c0_g2_i1	PPA19198	P5
ppa_stranded_DN10607_c0_g1_i1	PPA19203	P5
ppa_stranded_DN27976_c0_g2_i1	PPA19451	P5
ppa_stranded_DN24538_c0_g1_i1	PPA19840	P5
ppa_stranded_DN22192_c0_g1_i1	PPA19878	P5
ppa_stranded_DN19973_c0_g3_i1	PPA20003	P5
ppa_stranded_DN48699_c0_g1_i1	PPA20485	P5
ppa_stranded_DN17898_c0_g2_i1	PPA20668	P5
ppa_stranded_DN9157_c0_g1_i1	PPA21306	P5
ppa_stranded_DN30457_c0_g2_i1	PPA21318	P5
ppa_stranded_DN29278_c0_g1_i2	PPA21342	P5
ppa_stranded_DN16692_c0_g1_i1	PPA21787	P5
ppa_stranded_DN28838_c0_g1_i1	PPA21810	P5
ppa_stranded_DN542_c0_g1_i1	PPA22054	P5
ppa_stranded_DN30405_c0_g1_i1	PPA22307	P5
ppa_stranded_DN19815_c0_g1_i1	PPA22713	P5
ppa_stranded_DN24875_c0_g1_i1	PPA22885	P5
ppa_stranded_DN27251_c0_g3_i1	PPA22888	P5
ppa_stranded_DN22652_c0_g1_i2	PPA22939	P5
ppa_stranded_DN16101_c0_g1_i2	PPA23076	P5
ppa_stranded_DN48761_c0_g1_i1	PPA23347	P5
ppa_stranded_DN31085_c0_g2_i6	PPA23707	P5
ppa_stranded_DN8615_c0_g2_i1	PPA23749	P5
ppa_stranded_DN32970_c0_g1_i1	PPA24052	P5
ppa_stranded_DN11087_c0_g1_i1	PPA24091	P5
ppa_stranded_DN22869_c0_g1_i1	PPA24520	P5
ppa_stranded_DN26430_c1_g1_i2	PPA24642	P5
ppa_stranded_DN18975_c0_g1_i1	PPA24669	P5
ppa_stranded_DN24348_c0_g1_i1	PPA24687	P5
ppa_stranded_DN29009_c0_g1_i1	PPA24690	P5
ppa_stranded_DN30722_c2_g1_i1	PPA24803	P5
ppa_stranded_DN33183_c0_g1_i1	PPA24814	P5
ppa_stranded_DN21287_c0_g1_i1	PPA24815	P5
ppa_stranded_DN30577_c0_g1_i1	PPA25248	P5
ppa_stranded_DN31027_c0_g1_i7	PPA25572	P5
ppa_stranded_DN27818_c0_g1_i2	PPA25626	P5
ppa_stranded_DN30666_c4_g7_i1	PPA25699	P5
ppa_stranded_DN30746_c0_g2_i1	PPA25833	P5
ppa_stranded_DN4118_c1_g1_i1	PPA25871	P5
ppa_stranded_DN31089_c0_g2_i4	PPA26055	P5
ppa_stranded_DN20000_c0_g1_i2	PPA26153	P5
ppa_stranded_DN19181_c0_g1_i1	PPA26273	P5
ppa_stranded_DN48806_c0_g1_i1	PPA26288	P5
ppa_stranded_DN22242_c0_g1_i1	PPA26433	P5
ppa_stranded_DN19590_c0_g1_i1	PPA26532	P5
ppa_stranded_DN30116_c0_g1_i1	PPA26837	P5
ppa_stranded_DN28480_c0_g2_i1	PPA27360	P5
ppa_stranded_DN29288_c0_g3_i3	PPA27810	P5
ppa_stranded_DN23111_c0_g1_i1	PPA27826	P5
ppa_stranded_DN28567_c0_g1_i1	PPA27873	P5
ppa_stranded_DN24866_c0_g2_i1	PPA28061	P5
ppa_stranded_DN21305_c0_g1_i2	PPA28099	P5
ppa_stranded_DN22214_c0_g2_i1	PPA28200	P5
ppa_stranded_DN26511_c0_g2_i1	PPA28563	P5
ppa_stranded_DN23148_c1_g1_i1	PPA28622	P5
ppa_stranded_DN31035_c0_g3_i5	PPA28702	P5
ppa_stranded_DN3790_c0_g1_i1	PPA29020	P5
ppa_stranded_DN23914_c0_g1_i2	PPA30110	P5
ppa_stranded_DN20097_c0_g1_i1	PPA30136	P5
ppa_stranded_DN30965_c8_g1_i5	PPA30584	P5
ppa_stranded_DN23917_c0_g2_i1	PPA30588	P5
ppa_stranded_DN22984_c0_g1_i1	PPA30712	P5
ppa_stranded_DN28142_c0_g1_i1	PPA31292	P5
ppa_stranded_DN29097_c0_g1_i1	PPA31332	P5
ppa_stranded_DN21742_c0_g1_i1	PPA31338	P5
ppa_stranded_DN21276_c0_g1_i1	PPA31435	P5
ppa_stranded_DN8165_c0_g2_i1	PPA31671	P5
ppa_stranded_DN16371_c0_g1_i1	PPA31986	P5
ppa_stranded_DN30782_c0_g2_i1	PPA32111	P5
ppa_stranded_DN22774_c0_g2_i1	PPA32113	P5
ppa_stranded_DN30703_c0_g1_i7	PPA32271	P5
ppa_stranded_DN24112_c0_g1_i1	PPA32315	P5
ppa_stranded_DN22444_c0_g1_i1	PPA32394	P5
ppa_stranded_DN22670_c0_g1_i1	PPA32663	P5
ppa_stranded_DN20789_c0_g1_i1	PPA32814	P5
ppa_stranded_DN40479_c0_g1_i1	PPA33067	P5
ppa_stranded_DN21312_c0_g1_i2	PPA33288	P5
ppa_stranded_DN20668_c0_g1_i1	PPA33515	P5
ppa_stranded_DN29426_c0_g1_i1	PPA33626	P5
ppa_stranded_DN23605_c0_g1_i1	PPA33627	P5
ppa_stranded_DN16655_c0_g2_i1	PPA33655	P5
ppa_stranded_DN29841_c0_g2_i2	PPA33737	P5
ppa_stranded_DN30785_c1_g3_i1	PPA33744	P5
ppa_stranded_DN22569_c0_g1_i2	PPA33746	P5
ppa_stranded_DN10665_c0_g1_i1	PPA33749	P5
ppa_stranded_DN17284_c0_g1_i1	PPA33871	P5
ppa_stranded_DN36794_c0_g1_i1	PPA33897	P5
ppa_stranded_DN17579_c0_g1_i2	PPA33966	P5
ppa_stranded_DN29892_c0_g1_i6	PPA34108	P5
ppa_stranded_DN29875_c0_g2_i1	PPA34565	P5
ppa_stranded_DN30524_c0_g3_i1	PPA34612	P5
ppa_stranded_DN29600_c0_g1_i1	PPA34626	P5
ppa_stranded_DN43816_c0_g1_i1	PPA34657	P5
ppa_stranded_DN27190_c0_g1_i2	PPA34701	P5
ppa_stranded_DN26463_c0_g1_i2	PPA34706	P5
ppa_stranded_DN33483_c0_g1_i1	PPA34732	P5
ppa_stranded_DN24072_c2_g1_i1	PPA34798	P5
ppa_stranded_DN27541_c0_g1_i1	PPA34849	P5
ppa_stranded_DN23601_c0_g1_i1	PPA34858	P5
ppa_stranded_DN23785_c0_g1_i1	PPA34866	P5
ppa_stranded_DN19919_c0_g1_i2	PPA34896	P5
ppa_stranded_DN31116_c1_g1_i2	PPA35015	P5
ppa_stranded_DN31116_c0_g1_i1	PPA35018	P5
ppa_stranded_DN36552_c0_g1_i1	PPA35194	P5
ppa_stranded_DN23958_c0_g3_i1	PPA35428	P5
ppa_stranded_DN23432_c0_g2_i1	PPA35472	P5
ppa_stranded_DN30541_c6_g1_i1	PPA35476	P5
ppa_stranded_DN17366_c0_g1_i1	PPA35512	P5
ppa_stranded_DN27743_c0_g1_i1	PPA35522	P5
ppa_stranded_DN23432_c0_g1_i1	PPA35523	P5
ppa_stranded_DN12845_c0_g1_i1	PPA35546	P5
ppa_stranded_DN21094_c0_g1_i1	PPA35570	P5
ppa_stranded_DN29871_c0_g1_i2	PPA35597	P5
ppa_stranded_DN31260_c0_g1_i3	PPA35637	P5
ppa_stranded_DN31195_c0_g1_i5	PPA35697	P5
ppa_stranded_DN25507_c0_g1_i1	PPA35717	P5
ppa_stranded_DN29318_c0_g1_i1	PPA35730	P5
ppa_stranded_DN25351_c1_g1_i3	PPA35740	P5
ppa_stranded_DN30944_c0_g4_i10	PPA35877	P5
ppa_stranded_DN25610_c0_g1_i2	PPA36021	P5
ppa_stranded_DN22369_c0_g1_i2	PPA36107	P5
ppa_stranded_DN24195_c0_g1_i1	PPA36116	P5
ppa_stranded_DN16036_c0_g1_i1	PPA36166	P5
ppa_stranded_DN8166_c0_g1_i1	PPA36202	P5
ppa_stranded_DN19511_c0_g1_i3	PPA36205	P5
ppa_stranded_DN27204_c0_g2_i1	PPA36238	P5
ppa_stranded_DN31548_c0_g4_i2	PPA36325	P5
ppa_stranded_DN31060_c3_g1_i1	PPA36457	P5
ppa_stranded_DN23467_c0_g1_i1	PPA36560	P5
ppa_stranded_DN1987_c0_g2_i1	PPA36651	P5
ppa_stranded_DN15516_c0_g1_i1	PPA36746	P5
ppa_stranded_DN30156_c1_g1_i2	PPA36777	P5
ppa_stranded_DN31159_c0_g1_i2	PPA36860	P5
ppa_stranded_DN24083_c0_g1_i1	PPA36875	P5
ppa_stranded_DN43890_c0_g1_i1	PPA36926	P5
ppa_stranded_DN23788_c0_g1_i1	PPA37027	P5
ppa_stranded_DN47492_c0_g1_i1	PPA37038	P5
ppa_stranded_DN30839_c1_g1_i1	PPA37127	P5
ppa_stranded_DN28398_c0_g1_i2	PPA37242	P5
ppa_stranded_DN34618_c0_g1_i1	PPA37402	P5
ppa_stranded_DN25297_c0_g5_i1	PPA37500	P5
ppa_stranded_DN28086_c0_g1_i2	PPA37504	P5
ppa_stranded_DN19092_c0_g1_i1	PPA37524	P5
ppa_stranded_DN31136_c0_g1_i1	PPA37545	P5
ppa_stranded_DN36730_c0_g1_i1	PPA37569	P5
ppa_stranded_DN15618_c0_g1_i1	PPA37591	P5
ppa_stranded_DN14235_c0_g1_i1	PPA37597	P5
ppa_stranded_DN22883_c0_g3_i1	PPA37650	P5
ppa_stranded_DN29114_c1_g1_i1	PPA37663	P5
ppa_stranded_DN8563_c0_g2_i1	PPA37779	P5
ppa_stranded_DN35762_c0_g1_i1	PPA37844	P5
ppa_stranded_DN2288_c0_g1_i1	PPA37883	P5
ppa_stranded_DN23297_c0_g1_i4	PPA37887	P5
ppa_stranded_DN22100_c0_g1_i1	PPA37935	P5
ppa_stranded_DN25800_c0_g1_i1	PPA37966	P5
ppa_stranded_DN20510_c0_g1_i1	PPA37970	P5
ppa_stranded_DN26509_c1_g1_i3	PPA38184	P5
ppa_stranded_DN31590_c1_g1_i1	PPA38186	P5
ppa_stranded_DN30435_c1_g1_i1	PPA38213	P5
ppa_stranded_DN23351_c0_g1_i1	PPA38219	P5
ppa_stranded_DN25862_c0_g1_i1	PPA38228	P5
ppa_stranded_DN49729_c0_g1_i1	PPA38236	P5
ppa_stranded_DN31562_c3_g2_i3	PPA38247	P5
ppa_stranded_DN23022_c0_g1_i1	PPA38251	P5
ppa_stranded_DN27548_c0_g1_i1	PPA38254	P5
ppa_stranded_DN30524_c0_g1_i2	PPA38256	P5
ppa_stranded_DN17962_c0_g1_i1	PPA38258	P5
ppa_stranded_DN17726_c0_g1_i1	PPA38261	P5
ppa_stranded_DN8974_c0_g1_i1	PPA38282	P5
ppa_stranded_DN29008_c0_g1_i1	PPA38351	P5
ppa_stranded_DN30958_c3_g3_i1	PPA38398	P5
ppa_stranded_DN24024_c0_g1_i1	PPA38450	P5
ppa_stranded_DN30798_c0_g1_i1	PPA38478	P5
ppa_stranded_DN29009_c3_g1_i3	PPA38491	P5
ppa_stranded_DN31084_c0_g1_i4	PPA38513	P5
ppa_stranded_DN21472_c1_g1_i1	PPA38516	P5
ppa_stranded_DN27687_c1_g1_i3	PPA38524	P5
ppa_stranded_DN23148_c1_g2_i1	PPA38543	P5
ppa_stranded_DN27424_c0_g1_i1	PPA38838	P5
ppa_stranded_DN23196_c0_g1_i1	PPA38992	P5
ppa_stranded_DN31590_c1_g16_i1	PPA39043	P5
ppa_stranded_DN25182_c0_g2_i1	PPA39083	P5
ppa_stranded_DN4363_c0_g2_i1	PPA39123	P5
ppa_stranded_DN30074_c0_g1_i2	PPA39186	P5
ppa_stranded_DN25824_c0_g1_i1	PPA39228	P5
ppa_stranded_DN48758_c0_g1_i1	PPA39268	P5
ppa_stranded_DN28961_c0_g1_i1	PPA39381	P5
ppa_stranded_DN27808_c0_g2_i2	PPA39410	P5
ppa_stranded_DN18180_c0_g1_i1	PPA39420	P5
ppa_stranded_DN16207_c0_g1_i2	PPA39519	P5
ppa_stranded_DN23717_c0_g2_i2	PPA39526	P5
ppa_stranded_DN21085_c0_g1_i1	PPA39769	P5
ppa_stranded_DN29633_c1_g1_i2	PPA39795	P5
ppa_stranded_DN29764_c1_g1_i1	PPA39814	P5
ppa_stranded_DN31367_c1_g2_i1	PPA39875	P5
ppa_stranded_DN29788_c3_g2_i1	PPA40088	P5
ppa_stranded_DN18531_c0_g1_i1	PPA40161	P5
ppa_stranded_DN26320_c1_g1_i1	PPA40573	P5
ppa_stranded_DN775_c0_g1_i1	PPA40647	P5
ppa_stranded_DN22478_c0_g1_i1	PPA41424	P5
ppa_stranded_DN25731_c0_g1_i1	PPA41872	P5
ppa_stranded_DN30426_c1_g1_i2	PPA42027	P5
ppa_stranded_DN26189_c2_g2_i1	PPA42116	P5
ppa_stranded_DN29914_c0_g1_i3	PPA42121	P5
ppa_stranded_DN30423_c1_g1_i1	PPA42672	P5
ppa_stranded_DN21554_c0_g2_i1	PPA42698	P5
ppa_stranded_DN17910_c0_g2_i1	PPA42785	P5
ppa_stranded_DN16000_c0_g1_i1	PPA42875	P5
ppa_stranded_DN31184_c0_g1_i2	PPA43146	P5
ppa_stranded_DN31046_c2_g1_i3	PPA43223	P5
ppa_stranded_DN20670_c0_g1_i1	PPA43232	P5
ppa_stranded_DN22448_c0_g1_i1	PPA43368	P5
ppa_stranded_DN25210_c0_g1_i1	PPA43469	P5
ppa_stranded_DN5299_c0_g1_i1	PPA43475	P5
ppa_stranded_DN18210_c0_g2_i1	PPA43968	P5
ppa_stranded_DN24923_c0_g1_i1	PPA44298	P5
ppa_stranded_DN25172_c0_g1_i3	PPA44443	P5
ppa_stranded_DN3637_c0_g1_i1	PPA44935	P5
ppa_stranded_DN23579_c0_g1_i2	PPA45886	P5
ppa_stranded_DN23216_c0_g1_i2	UMM-S259-16.83-mRNA-1_trimmed	P5
ppa_stranded_DN31352_c6_g1_i1	UMM-S325-3.17-mRNA-1_frag	P5
ppa_stranded_DN25112_c0_g1_i2	UMM-S440-1.25-mRNA-1_part1	P5
ppa_stranded_DN31643_c5_g14_i1	Contig0-snapTAU.622	P6
ppa_stranded_DN16832_c0_g1_i1	Contig103-snapTAU.36	P6
ppa_stranded_DN30894_c2_g2_i3	Contig140-snapTAU.45	P6
ppa_stranded_DN15530_c0_g1_i1	Contig16-snapTAU.36	P6
ppa_stranded_DN31296_c0_g1_i1	Contig20-snapTAU.233	P6
ppa_stranded_DN31180_c2_g1_i2	Contig22-snapTAU.125	P6
ppa_stranded_DN30825_c0_g1_i1	Contig37-snapTAU.206	P6
ppa_stranded_DN22327_c0_g1_i1	Contig61-snap.66	P6
ppa_stranded_DN22156_c0_g1_i1	Contig75-snapTAU.159	P6
ppa_stranded_DN26945_c0_g1_i5	Iso_D.10782.1	P6
ppa_stranded_DN22665_c0_g1_i1	Iso_D.10815.2	P6
ppa_stranded_DN27167_c0_g1_i2	Iso_D.12981.1	P6
ppa_stranded_DN29819_c2_g1_i3	Iso_D.14050.1	P6
ppa_stranded_DN29412_c3_g2_i1	Iso_D.14389.2	P6
ppa_stranded_DN22206_c0_g1_i1	Iso_D.3144.1	P6
ppa_stranded_DN17130_c0_g1_i1	Iso_D.6161.1	P6
ppa_stranded_DN22124_c0_g1_i1	Iso_D.7530.3	P6
ppa_stranded_DN40965_c0_g1_i1	Iso_D.9255.1	P6
ppa_stranded_DN30834_c6_g2_i5	isopolya.2965.2	P6
ppa_stranded_DN30874_c0_g2_i8	isopolya.7427.1	P6
ppa_stranded_DN19027_c0_g1_i1	isopolya.7851.1	P6
ppa_stranded_DN27740_c0_g2_i1	isototal.1523.1	P6
ppa_stranded_DN31244_c0_g3_i2	isototal.2214.1	P6
ppa_stranded_DN22021_c0_g1_i1	isototal.4742.1	P6
ppa_stranded_DN10041_c0_g1_i1	ppa_stranded_DN10041_c0_g1_i1	P6
ppa_stranded_DN10043_c0_g1_i1	ppa_stranded_DN10043_c0_g1_i1	P6
ppa_stranded_DN10051_c0_g1_i1	ppa_stranded_DN10051_c0_g1_i1	P6
ppa_stranded_DN10279_c0_g1_i1	ppa_stranded_DN10279_c0_g1_i1	P6
ppa_stranded_DN11767_c0_g1_i1	ppa_stranded_DN11767_c0_g1_i1	P6
ppa_stranded_DN1369_c0_g1_i1	ppa_stranded_DN1369_c0_g1_i1	P6
ppa_stranded_DN14711_c0_g1_i1	ppa_stranded_DN14711_c0_g1_i1	P6
ppa_stranded_DN15731_c0_g1_i2	ppa_stranded_DN15731_c0_g1_i2	P6
ppa_stranded_DN15877_c0_g1_i1	ppa_stranded_DN15877_c0_g1_i1	P6
ppa_stranded_DN16014_c0_g1_i2	ppa_stranded_DN16014_c0_g1_i2	P6
ppa_stranded_DN16206_c0_g2_i1	ppa_stranded_DN16206_c0_g2_i1	P6
ppa_stranded_DN16305_c0_g1_i1	ppa_stranded_DN16305_c0_g1_i1	P6
ppa_stranded_DN16562_c0_g1_i2	ppa_stranded_DN16562_c0_g1_i1	P6
ppa_stranded_DN16580_c0_g1_i1	ppa_stranded_DN16580_c0_g1_i1	P6
ppa_stranded_DN1667_c0_g1_i1	ppa_stranded_DN1667_c0_g1_i1	P6
ppa_stranded_DN16772_c0_g1_i1	ppa_stranded_DN16772_c0_g1_i1	P6
ppa_stranded_DN17869_c1_g1_i1	ppa_stranded_DN17869_c1_g1_i1	P6
ppa_stranded_DN18046_c0_g1_i1	ppa_stranded_DN18046_c0_g1_i1	P6
ppa_stranded_DN18074_c0_g3_i1	ppa_stranded_DN18074_c0_g3_i1	P6
ppa_stranded_DN18652_c0_g2_i1	ppa_stranded_DN18652_c0_g2_i1	P6
ppa_stranded_DN18705_c0_g1_i1	ppa_stranded_DN18705_c0_g1_i1	P6
ppa_stranded_DN18971_c0_g1_i1	ppa_stranded_DN18971_c0_g1_i1	P6
ppa_stranded_DN19053_c0_g1_i1	ppa_stranded_DN19053_c0_g1_i1	P6
ppa_stranded_DN19073_c0_g1_i1	ppa_stranded_DN19073_c0_g1_i1	P6
ppa_stranded_DN19120_c0_g1_i1	ppa_stranded_DN19120_c0_g1_i1	P6
ppa_stranded_DN19131_c0_g1_i1	ppa_stranded_DN19131_c0_g1_i1	P6
ppa_stranded_DN19639_c0_g1_i1	ppa_stranded_DN19639_c0_g1_i1	P6
ppa_stranded_DN19721_c0_g2_i1	ppa_stranded_DN19721_c0_g2_i1	P6
ppa_stranded_DN19886_c0_g1_i1	ppa_stranded_DN19886_c0_g1_i1	P6
ppa_stranded_DN19945_c0_g1_i1	ppa_stranded_DN19945_c0_g1_i1	P6
ppa_stranded_DN19977_c0_g1_i3	ppa_stranded_DN19977_c0_g1_i2	P6
ppa_stranded_DN20171_c0_g1_i1	ppa_stranded_DN20171_c0_g1_i1	P6
ppa_stranded_DN20635_c0_g1_i1	ppa_stranded_DN20635_c0_g1_i1	P6
ppa_stranded_DN20685_c0_g1_i2	ppa_stranded_DN20685_c0_g1_i1	P6
ppa_stranded_DN20794_c0_g1_i1	ppa_stranded_DN20794_c0_g1_i1	P6
ppa_stranded_DN21082_c0_g1_i1	ppa_stranded_DN21082_c0_g1_i1	P6
ppa_stranded_DN21144_c0_g1_i1	ppa_stranded_DN21144_c0_g1_i1	P6
ppa_stranded_DN21165_c0_g1_i2	ppa_stranded_DN21165_c0_g1_i2	P6
ppa_stranded_DN21279_c1_g1_i1	ppa_stranded_DN21279_c1_g1_i1	P6
ppa_stranded_DN21364_c0_g1_i1	ppa_stranded_DN21364_c0_g1_i1	P6
ppa_stranded_DN21453_c0_g2_i3	ppa_stranded_DN21453_c0_g2_i1	P6
ppa_stranded_DN21484_c0_g1_i1	ppa_stranded_DN21484_c0_g1_i1	P6
ppa_stranded_DN21636_c0_g3_i1	ppa_stranded_DN21636_c0_g3_i1	P6
ppa_stranded_DN21648_c0_g1_i1	ppa_stranded_DN21648_c0_g1_i2	P6
ppa_stranded_DN21680_c0_g1_i1	ppa_stranded_DN21680_c0_g1_i1	P6
ppa_stranded_DN21705_c0_g1_i2	ppa_stranded_DN21705_c0_g1_i2	P6
ppa_stranded_DN21735_c0_g1_i2	ppa_stranded_DN21735_c0_g1_i2	P6
ppa_stranded_DN21777_c0_g1_i2	ppa_stranded_DN21777_c0_g1_i1	P6
ppa_stranded_DN21836_c0_g1_i1	ppa_stranded_DN21836_c0_g1_i1	P6
ppa_stranded_DN22329_c0_g1_i1	ppa_stranded_DN22329_c0_g1_i3	P6
ppa_stranded_DN22985_c0_g1_i1	ppa_stranded_DN22985_c0_g1_i1	P6
ppa_stranded_DN22988_c0_g1_i1	ppa_stranded_DN22988_c0_g1_i1	P6
ppa_stranded_DN23133_c0_g2_i1	ppa_stranded_DN23133_c0_g2_i1	P6
ppa_stranded_DN23236_c0_g3_i1	ppa_stranded_DN23236_c0_g3_i1	P6
ppa_stranded_DN23316_c0_g1_i3	ppa_stranded_DN23316_c0_g1_i2	P6
ppa_stranded_DN23319_c0_g1_i2	ppa_stranded_DN23319_c0_g1_i1	P6
ppa_stranded_DN23387_c0_g1_i2	ppa_stranded_DN23387_c0_g1_i2	P6
ppa_stranded_DN23518_c0_g1_i2	ppa_stranded_DN23518_c0_g1_i3	P6
ppa_stranded_DN23533_c0_g1_i1	ppa_stranded_DN23533_c0_g1_i2	P6
ppa_stranded_DN23540_c0_g1_i1	ppa_stranded_DN23540_c0_g1_i1	P6
ppa_stranded_DN23767_c0_g1_i1	ppa_stranded_DN23767_c0_g1_i1	P6
ppa_stranded_DN23833_c1_g1_i1	ppa_stranded_DN23833_c1_g1_i1	P6
ppa_stranded_DN23834_c0_g1_i3	ppa_stranded_DN23834_c0_g1_i1	P6
ppa_stranded_DN23957_c0_g1_i5	ppa_stranded_DN23957_c0_g1_i5	P6
ppa_stranded_DN24441_c0_g1_i3	ppa_stranded_DN24441_c0_g1_i3	P6
ppa_stranded_DN24463_c0_g1_i1	ppa_stranded_DN24463_c0_g1_i1	P6
ppa_stranded_DN24476_c0_g1_i1	ppa_stranded_DN24476_c0_g1_i1	P6
ppa_stranded_DN24628_c0_g2_i1	ppa_stranded_DN24628_c0_g2_i1	P6
ppa_stranded_DN24667_c0_g1_i2	ppa_stranded_DN24667_c0_g1_i2	P6
ppa_stranded_DN24690_c0_g1_i4	ppa_stranded_DN24690_c0_g1_i1	P6
ppa_stranded_DN24722_c1_g1_i1	ppa_stranded_DN24722_c1_g1_i1	P6
ppa_stranded_DN24763_c0_g1_i1	ppa_stranded_DN24763_c0_g1_i2	P6
ppa_stranded_DN24916_c0_g1_i2	ppa_stranded_DN24916_c0_g1_i3	P6
ppa_stranded_DN24948_c0_g1_i1	ppa_stranded_DN24948_c0_g1_i1	P6
ppa_stranded_DN24998_c0_g1_i3	ppa_stranded_DN24998_c0_g1_i2	P6
ppa_stranded_DN25151_c1_g1_i1	ppa_stranded_DN25151_c1_g1_i1	P6
ppa_stranded_DN25183_c0_g1_i2	ppa_stranded_DN25183_c0_g1_i3	P6
ppa_stranded_DN25319_c0_g1_i1	ppa_stranded_DN25319_c0_g1_i2	P6
ppa_stranded_DN25329_c0_g1_i1	ppa_stranded_DN25329_c0_g1_i1	P6
ppa_stranded_DN25382_c0_g1_i2	ppa_stranded_DN25382_c0_g1_i1	P6
ppa_stranded_DN25522_c0_g1_i4	ppa_stranded_DN25522_c0_g1_i7	P6
ppa_stranded_DN25739_c0_g1_i7	ppa_stranded_DN25739_c0_g1_i3	P6
ppa_stranded_DN25914_c0_g2_i1	ppa_stranded_DN25914_c0_g2_i1	P6
ppa_stranded_DN25916_c0_g2_i1	ppa_stranded_DN25916_c0_g2_i1	P6
ppa_stranded_DN25950_c1_g1_i1	ppa_stranded_DN25950_c1_g1_i2	P6
ppa_stranded_DN26062_c0_g1_i1	ppa_stranded_DN26062_c0_g1_i3	P6
ppa_stranded_DN26090_c0_g1_i2	ppa_stranded_DN26090_c0_g1_i2	P6
ppa_stranded_DN26239_c0_g2_i1	ppa_stranded_DN26239_c0_g1_i3	P6
ppa_stranded_DN26291_c1_g1_i1	ppa_stranded_DN26291_c1_g1_i3	P6
ppa_stranded_DN26350_c0_g1_i1	ppa_stranded_DN26350_c0_g1_i2	P6
ppa_stranded_DN26425_c0_g2_i1	ppa_stranded_DN26425_c0_g2_i1	P6
ppa_stranded_DN26835_c0_g1_i3	ppa_stranded_DN26835_c0_g1_i3	P6
ppa_stranded_DN26872_c0_g1_i3	ppa_stranded_DN26872_c0_g1_i3	P6
ppa_stranded_DN26875_c0_g1_i1	ppa_stranded_DN26875_c0_g1_i1	P6
ppa_stranded_DN26958_c0_g1_i1	ppa_stranded_DN26958_c0_g1_i1	P6
ppa_stranded_DN26968_c0_g1_i1	ppa_stranded_DN26968_c0_g1_i1	P6
ppa_stranded_DN270_c0_g1_i1	ppa_stranded_DN270_c0_g1_i1	P6
ppa_stranded_DN27050_c0_g1_i1	ppa_stranded_DN27050_c0_g1_i1	P6
ppa_stranded_DN27050_c1_g1_i1	ppa_stranded_DN27050_c1_g1_i2	P6
ppa_stranded_DN27061_c0_g1_i3	ppa_stranded_DN27061_c0_g1_i3	P6
ppa_stranded_DN27098_c0_g1_i2	ppa_stranded_DN27098_c0_g1_i1	P6
ppa_stranded_DN27199_c0_g1_i1	ppa_stranded_DN27199_c0_g1_i1	P6
ppa_stranded_DN27201_c0_g1_i6	ppa_stranded_DN27201_c0_g1_i8	P6
ppa_stranded_DN27218_c0_g1_i5	ppa_stranded_DN27218_c0_g1_i5	P6
ppa_stranded_DN27257_c0_g3_i1	ppa_stranded_DN27257_c0_g3_i3	P6
ppa_stranded_DN27330_c0_g1_i3	ppa_stranded_DN27330_c0_g1_i1	P6
ppa_stranded_DN27388_c0_g1_i1	ppa_stranded_DN27388_c0_g1_i1	P6
ppa_stranded_DN27420_c0_g1_i1	ppa_stranded_DN27420_c0_g1_i1	P6
ppa_stranded_DN27447_c1_g1_i2	ppa_stranded_DN27447_c1_g1_i1	P6
ppa_stranded_DN27456_c0_g2_i1	ppa_stranded_DN27456_c0_g2_i2	P6
ppa_stranded_DN27457_c0_g1_i2	ppa_stranded_DN27457_c0_g1_i2	P6
ppa_stranded_DN27464_c0_g1_i1	ppa_stranded_DN27464_c0_g1_i3	P6
ppa_stranded_DN27467_c0_g2_i1	ppa_stranded_DN27467_c0_g2_i1	P6
ppa_stranded_DN27534_c0_g1_i2	ppa_stranded_DN27534_c0_g1_i2	P6
ppa_stranded_DN27585_c0_g1_i2	ppa_stranded_DN27585_c0_g1_i2	P6
ppa_stranded_DN27769_c1_g2_i1	ppa_stranded_DN27769_c1_g2_i1	P6
ppa_stranded_DN27814_c0_g1_i2	ppa_stranded_DN27814_c0_g1_i2	P6
ppa_stranded_DN27824_c0_g5_i2	ppa_stranded_DN27824_c0_g5_i2	P6
ppa_stranded_DN27953_c0_g1_i5	ppa_stranded_DN27953_c0_g1_i5	P6
ppa_stranded_DN28021_c1_g1_i1	ppa_stranded_DN28021_c1_g1_i1	P6
ppa_stranded_DN28221_c0_g1_i1	ppa_stranded_DN28221_c0_g1_i1	P6
ppa_stranded_DN28237_c0_g2_i3	ppa_stranded_DN28237_c0_g2_i3	P6
ppa_stranded_DN28394_c0_g1_i1	ppa_stranded_DN28394_c0_g1_i5	P6
ppa_stranded_DN28417_c0_g2_i1	ppa_stranded_DN28417_c0_g2_i1	P6
ppa_stranded_DN28424_c0_g1_i3	ppa_stranded_DN28424_c0_g1_i3	P6
ppa_stranded_DN28488_c0_g1_i3	ppa_stranded_DN28488_c0_g1_i3	P6
ppa_stranded_DN28537_c0_g2_i1	ppa_stranded_DN28537_c0_g2_i1	P6
ppa_stranded_DN28568_c0_g1_i12	ppa_stranded_DN28568_c0_g1_i8	P6
ppa_stranded_DN28615_c0_g1_i9	ppa_stranded_DN28615_c0_g1_i3	P6
ppa_stranded_DN28854_c0_g1_i1	ppa_stranded_DN28854_c0_g1_i1	P6
ppa_stranded_DN28896_c0_g2_i1	ppa_stranded_DN28896_c0_g2_i1	P6
ppa_stranded_DN28904_c0_g1_i1	ppa_stranded_DN28904_c0_g1_i1	P6
ppa_stranded_DN28919_c1_g4_i1	ppa_stranded_DN28919_c1_g4_i1	P6
ppa_stranded_DN29024_c0_g1_i1	ppa_stranded_DN29024_c0_g1_i1	P6
[truncated: 1,157 more rows]
