# Supplementary material for: Single worm transcriptomics identifies a developmental core network of oscillating genes with deep conservation across nematodes
Source: HighWire-hosted journal article supplement (doi:10.1101/gr.275303.121), 2021-07-22
Supplement: Supplemental_Table_S11.xlsx [file Supplemental_Table_S11.xlsx]

## Sheet: tb_info_rosc380_fv
Supplemental Table S11 The 380 regional oscillations in P.pacificus
Gene_ID_El.Paco_V3	Gene_ID_Trinity2017	Phase_class	Region_class
PPA35659	ppa_stranded_DN24057_c0_g1_i1	P6	pc01
ppa_stranded_DN30694_c4_g2_i2	ppa_stranded_DN30694_c4_g2_i2	P6	pc01
PPA38627	ppa_stranded_DN31619_c1_g4_i1	P6	pc01
ppa_stranded_DN30694_c0_g2_i1	ppa_stranded_DN30694_c0_g2_i1	P6	pc01
PPA09627	ppa_stranded_DN29606_c1_g3_i1	P1	pc01
PPA40163	ppa_stranded_DN22462_c0_g2_i1	P9	pc01
PPA16598	ppa_stranded_DN25301_c0_g2_i1	P2	pc01
PPA22808	ppa_stranded_DN16779_c0_g1_i3	P6	pc01
ppa_stranded_DN31640_c2_g27_i6	ppa_stranded_DN31640_c2_g27_i2	P6	pc01
ppa_stranded_DN27768_c0_g1_i5	ppa_stranded_DN27768_c0_g1_i3	P2	pc01		Supplemental Table S11 The 380 regional oscillations in P.pacificus
ppa_stranded_DN25698_c0_g2_i1	ppa_stranded_DN25698_c0_g2_i1	P4	pc01
ppa_stranded_DN31610_c0_g6_i1	ppa_stranded_DN31610_c0_g6_i1	P7	pc01
PPA38622	ppa_stranded_DN10485_c0_g1_i1	P2	pc01
PPA25521	ppa_stranded_DN30242_c0_g1_i16	P7	pc01
ppa_stranded_DN18064_c0_g2_i1	ppa_stranded_DN18064_c0_g2_i1	P7	pc01
PPA38591	ppa_stranded_DN6271_c0_g2_i1	P6	pc01
PPA40333	ppa_stranded_DN25519_c1_g2_i1	P6	pc01
PPA27311	ppa_stranded_DN21923_c0_g1_i1	P8	pc01
PPA30142	ppa_stranded_DN5063_c0_g2_i1	P3	pc01
PPA14047	ppa_stranded_DN26894_c0_g1_i5	P6	pc01
ppa_stranded_DN23957_c0_g1_i5	ppa_stranded_DN23957_c0_g1_i5	P6	pc01
PPA13364	ppa_stranded_DN29382_c0_g1_i4	P2	pc01
PPA32901	ppa_stranded_DN31482_c0_g2_i6	P2	pc01
PPA19920	ppa_stranded_DN27480_c2_g1_i2	P3	pc01
PPA11389	ppa_stranded_DN31138_c13_g1_i1	P3	pc01
PPA01881	ppa_stranded_DN25941_c0_g1_i3	P11	pc01
Iso_D.14050.1	ppa_stranded_DN29819_c2_g1_i3	P6	pc01
ppa_stranded_DN31590_c1_g26_i1	ppa_stranded_DN31590_c1_g26_i1	P9	pc01
PPA38516	ppa_stranded_DN21472_c1_g1_i1	P5	pc01
ppa_stranded_DN20231_c0_g1_i2	ppa_stranded_DN20231_c0_g1_i1	P9	pc01
PPA38613	ppa_stranded_DN30475_c0_g6_i1	P7	pc01
ppa_stranded_DN31074_c0_g1_i1	ppa_stranded_DN31074_c0_g1_i3	P4	pc01
ppa_stranded_DN32008_c0_g1_i1	ppa_stranded_DN32008_c0_g1_i1	P2	pc01
PPA40709	ppa_stranded_DN30563_c4_g1_i1	P4	pc01
ppa_stranded_DN27457_c0_g1_i2	ppa_stranded_DN27457_c0_g1_i2	P6	pc01
PPA38495	ppa_stranded_DN25345_c0_g1_i1	P9	pc01
PPA21867	ppa_stranded_DN15345_c0_g1_i1	P3	pc01
ppa_stranded_DN22988_c0_g1_i1	ppa_stranded_DN22988_c0_g1_i1	P6	pc01
PPA03824	ppa_stranded_DN4168_c0_g1_i1	P7	pc01
PPA40518	ppa_stranded_DN30970_c5_g4_i2	P11	pc01
ppa_stranded_DN26955_c0_g2_i2	ppa_stranded_DN26955_c0_g2_i4	P8	pc01
PPA38434	ppa_stranded_DN18822_c0_g1_i1	P6	pc01
PPA11291	ppa_stranded_DN30560_c9_g4_i5	P6	pc01
ppa_stranded_DN30515_c0_g2_i2	ppa_stranded_DN30515_c0_g2_i2	P3	pc01
PPA06081	ppa_stranded_DN40793_c0_g1_i1	P2	pc01
PPA26632	ppa_stranded_DN16690_c0_g1_i1	P4	pc01
PPA16153	ppa_stranded_DN20656_c0_g2_i1	P3	pc01
PPA21784	ppa_stranded_DN26460_c0_g1_i3	P4	pc01
PPA20343	ppa_stranded_DN35759_c0_g1_i1	P2	pc01
ppa_stranded_DN28325_c0_g2_i1	ppa_stranded_DN28325_c0_g2_i3	P3	pc01
PPA39237	ppa_stranded_DN27615_c0_g1_i2	P9	pc01
PPA34818	ppa_stranded_DN48327_c0_g1_i1	P8	pc01
ppa_stranded_DN28675_c0_g1_i2	ppa_stranded_DN28675_c0_g1_i2	P1	pc01
ppa_stranded_DN28697_c2_g3_i1	ppa_stranded_DN28697_c2_g3_i1	P2	pc01
PPA18074	ppa_stranded_DN25201_c0_g1_i3	P1	pc01
PPA30306	ppa_stranded_DN20845_c0_g1_i2	P3	pc01
PPA13859	ppa_stranded_DN26127_c2_g1_i1	P11	pc01
PPA44689	ppa_stranded_DN25843_c0_g1_i1	P8	pc01
PPA43424	ppa_stranded_DN25882_c0_g1_i1	P2	pc01
PPA03108	ppa_stranded_DN5892_c0_g1_i1	P2	pc01
PPA39421	ppa_stranded_DN21818_c0_g1_i1	P3	pc01
ppa_stranded_DN26253_c0_g1_i1	ppa_stranded_DN26253_c0_g1_i1	P3	pc01
isopolya.3147.1	ppa_stranded_DN20533_c0_g1_i2	P8	pc01
PPA19734	ppa_stranded_DN30801_c4_g1_i9	P6	pc01
PPA39449	ppa_stranded_DN9563_c0_g1_i1	P11	pc01
PPA40600	ppa_stranded_DN23418_c0_g2_i1	P8	pc01
PPA17392	ppa_stranded_DN28125_c0_g2_i1	P2	pc01
PPA04141	ppa_stranded_DN31263_c3_g5_i1	P8	pc01
PPA21883	ppa_stranded_DN23695_c0_g2_i1	P11	pc01
PPA05184	ppa_stranded_DN29656_c0_g2_i1	P3	pc01
ppa_stranded_DN23941_c1_g4_i1	ppa_stranded_DN23941_c1_g4_i1	P3	pc01
PPA42214	ppa_stranded_DN26928_c1_g3_i1	P3	pc01
ppa_stranded_DN27581_c0_g2_i1	ppa_stranded_DN27581_c0_g2_i1	P2	pc01
ppa_stranded_DN18104_c0_g1_i1	ppa_stranded_DN18104_c0_g1_i1	P2	pc01
ppa_stranded_DN26237_c0_g3_i1	ppa_stranded_DN26237_c0_g3_i1	P8	pc01
PPA28211	ppa_stranded_DN31454_c6_g2_i1	P1	pc01
ppa_stranded_DN23211_c0_g1_i1	ppa_stranded_DN23211_c0_g1_i2	P2	pc01
PPA37857	ppa_stranded_DN29812_c3_g1_i2	P2	pc01
ppa_stranded_DN31545_c0_g2_i6	ppa_stranded_DN31545_c0_g2_i7	P7	pc01
PPA01023	ppa_stranded_DN29788_c0_g1_i1	P11	pc01
PPA03479	ppa_stranded_DN23585_c0_g1_i2	P2	pc01
PPA00658	ppa_stranded_DN23941_c1_g2_i1	P1	pc01
PPA38133	ppa_stranded_DN1773_c0_g2_i1	P2	pc02
ppa_stranded_DN29603_c0_g1_i1	ppa_stranded_DN29603_c0_g1_i3	P7	pc02
PPA14126	ppa_stranded_DN18151_c0_g2_i1	P1	pc02
PPA14172	ppa_stranded_DN21283_c0_g1_i4	P11	pc02
ppa_stranded_DN28912_c0_g1_i1	ppa_stranded_DN28912_c0_g1_i1	P3	pc02
PPA02445	ppa_stranded_DN18820_c0_g1_i1	P6	pc02
PPA36794	ppa_stranded_DN24725_c0_g2_i1	P2	pc02
PPA00907	ppa_stranded_DN26706_c0_g1_i2	P4	pc02
ppa_stranded_DN29917_c0_g1_i2	ppa_stranded_DN29917_c0_g1_i2	P3	pc02
PPA08488	ppa_stranded_DN28150_c1_g1_i3	P2	pc02
ppa_stranded_DN33078_c0_g1_i1	ppa_stranded_DN33078_c0_g1_i1	P2	pc02
ppa_stranded_DN36465_c0_g1_i1	ppa_stranded_DN36465_c0_g1_i1	P6	pc02
PPA25785	ppa_stranded_DN28088_c0_g1_i1	P3	pc02
ppa_stranded_DN30400_c0_g1_i5	ppa_stranded_DN30400_c0_g1_i6	P1	pc02
ppa_stranded_DN8968_c0_g1_i1	ppa_stranded_DN8968_c0_g1_i1	P8	pc02
PPA33150	ppa_stranded_DN28306_c0_g1_i2	P2	pc02
PPA30704	ppa_stranded_DN23671_c0_g1_i1	P2	pc02
ppa_stranded_DN30464_c0_g1_i2	ppa_stranded_DN30464_c0_g1_i1	P5	pc02
PPA31448	ppa_stranded_DN49581_c0_g1_i1	P2	pc02
PPA02603	ppa_stranded_DN19771_c0_g1_i1	P8	pc02
ppa_stranded_DN26608_c0_g1_i1	ppa_stranded_DN26608_c0_g1_i1	P5	pc02
PPA22796	ppa_stranded_DN15510_c0_g1_i1	P2	pc02
PPA28099	ppa_stranded_DN21305_c0_g1_i2	P5	pc02
PPA15425	ppa_stranded_DN28042_c0_g1_i2	P3	pc02
PPA19753	ppa_stranded_DN24760_c0_g1_i1	P2	pc02
Iso_D.1590.1	ppa_stranded_DN30867_c0_g1_i12	P4	pc02
ppa_stranded_DN7360_c0_g1_i1	ppa_stranded_DN7360_c0_g1_i1	P2	pc02
PPA22116	ppa_stranded_DN31118_c0_g9_i2	P3	pc02
PPA16111	ppa_stranded_DN14522_c0_g1_i1	P2	pc02
PPA05920	ppa_stranded_DN31310_c6_g4_i1	P2	pc02
PPA39268	ppa_stranded_DN48758_c0_g1_i1	P5	pc02
ppa_stranded_DN31079_c0_g2_i1	ppa_stranded_DN31079_c0_g2_i1	P11	pc02
ppa_stranded_DN31543_c0_g1_i1	ppa_stranded_DN31543_c0_g1_i1	P10	pc02
PPA39814	ppa_stranded_DN29764_c1_g1_i1	P5	pc02
PPA03244	ppa_stranded_DN25558_c0_g1_i3	P1	pc02
Iso_D.13540.1	ppa_stranded_DN29225_c0_g3_i7	P11	pc02
ppa_stranded_DN25931_c0_g1_i1	ppa_stranded_DN25931_c0_g1_i1	P1	pc02
ppa_stranded_DN29628_c4_g2_i3	ppa_stranded_DN29628_c4_g2_i2	P7	pc02
ppa_stranded_DN25212_c0_g2_i2	ppa_stranded_DN25212_c0_g2_i1	P3	pc02
PPA29020	ppa_stranded_DN3790_c0_g1_i1	P5	pc02
PPA25950	ppa_stranded_DN20230_c0_g1_i1	P3	pc02
ppa_stranded_DN25657_c0_g1_i3	ppa_stranded_DN25657_c0_g1_i1	P9	pc02
PPA19990	ppa_stranded_DN24387_c0_g2_i1	P11	pc02
PPA36679	ppa_stranded_DN26772_c0_g1_i2	P3	pc03
PPA39114	ppa_stranded_DN30970_c0_g1_i1	P11	pc03
PPA37109	ppa_stranded_DN30061_c0_g1_i2	P9	pc03
PPA37940	ppa_stranded_DN31537_c11_g1_i1	P11	pc03
ppa_stranded_DN21636_c0_g3_i1	ppa_stranded_DN21636_c0_g3_i1	P6	pc03
PPA40848	ppa_stranded_DN23294_c0_g1_i2	P2	pc03
PPA38734	ppa_stranded_DN30783_c1_g1_i3	P7	pc03
PPA05773	ppa_stranded_DN29000_c0_g1_i4	P4	pc03
ppa_stranded_DN27686_c0_g2_i1	ppa_stranded_DN27686_c0_g2_i1	P8	pc03
ppa_stranded_DN27433_c0_g3_i4	ppa_stranded_DN27433_c0_g3_i8	P2	pc03
ppa_stranded_DN21341_c0_g1_i1	ppa_stranded_DN21341_c0_g1_i1	P2	pc03
PPA09827	ppa_stranded_DN44331_c0_g1_i1	P4	pc03
Iso_D.6086.1	ppa_stranded_DN28477_c1_g2_i2	P4	pc03
PPA13818	ppa_stranded_DN26748_c0_g1_i3	P2	pc03
PPA04672	ppa_stranded_DN29912_c0_g1_i3	P4	pc03
ppa_stranded_DN19599_c0_g1_i1	ppa_stranded_DN19599_c0_g1_i1	P1	pc03
PPA12792	ppa_stranded_DN24727_c0_g1_i3	P3	pc03
PPA09811	ppa_stranded_DN28902_c0_g2_i1	P4	pc03
ppa_stranded_DN31138_c10_g1_i7	ppa_stranded_DN31138_c10_g1_i7	P3	pc03
PPA03411	ppa_stranded_DN24345_c0_g1_i2	P2	pc03
PPA36656	ppa_stranded_DN31529_c2_g2_i2	P11	pc03
PPA08838	ppa_stranded_DN22620_c0_g1_i3	P9	pc03
PPA20015	ppa_stranded_DN20095_c0_g1_i2	P7	pc03
PPA21942	ppa_stranded_DN24681_c0_g2_i2	P10	pc04
PPA37474	ppa_stranded_DN30970_c5_g14_i5	P11	pc04
PPA09836	ppa_stranded_DN23314_c0_g2_i1	P10	pc04
ppa_stranded_DN15811_c0_g1_i1	ppa_stranded_DN15811_c0_g1_i1	P10	pc04
PPA08201	ppa_stranded_DN25816_c1_g1_i1	P6	pc04
PPA08503	ppa_stranded_DN29593_c1_g2_i1	P11	pc04
PPA06614	ppa_stranded_DN17102_c1_g1_i1	P3	pc04
PPA15980	ppa_stranded_DN24488_c0_g2_i1	P2	pc04
PPA14796	ppa_stranded_DN26385_c0_g1_i2	P3	pc04
PPA05782	ppa_stranded_DN18952_c0_g1_i1	P10	pc04
ppa_stranded_DN25120_c0_g1_i1	ppa_stranded_DN25120_c0_g1_i1	P10	pc04
PPA36622	ppa_stranded_DN28772_c0_g2_i2	P8	pc04
ppa_stranded_DN31048_c0_g1_i1	ppa_stranded_DN31048_c0_g1_i1	P11	pc04
ppa_stranded_DN17902_c0_g1_i1	ppa_stranded_DN17902_c0_g1_i1	P11	pc04
PPA03364	ppa_stranded_DN28429_c1_g1_i1	P2	pc04
ppa_stranded_DN20171_c0_g1_i1	ppa_stranded_DN20171_c0_g1_i1	P6	pc04
PPA43326	ppa_stranded_DN26769_c0_g1_i1	P11	pc04
ppa_stranded_DN15428_c0_g1_i1	ppa_stranded_DN15428_c0_g1_i2	P7	pc04
PPA39045	ppa_stranded_DN44184_c0_g1_i1	P2	pc04
PPA00163	ppa_stranded_DN19686_c0_g2_i1	P2	pc04
PPA35797	ppa_stranded_DN13009_c0_g1_i1	P11	pc04
PPA05287	ppa_stranded_DN2313_c0_g1_i1	P11	pc04
PPA07280	ppa_stranded_DN24072_c0_g1_i1	P3	pc04
PPA09598	ppa_stranded_DN7983_c0_g1_i1	P11	pc04
ppa_stranded_DN27485_c0_g1_i6	ppa_stranded_DN27485_c0_g1_i3	P7	pc04
PPA01585	ppa_stranded_DN18040_c0_g1_i2	P5	pc04
PPA13040	ppa_stranded_DN24495_c0_g1_i1	P4	pc05
PPA11369	ppa_stranded_DN31621_c0_g12_i1	P6	pc05
PPA28622	ppa_stranded_DN23148_c1_g1_i1	P5	pc05
ppa_stranded_DN30092_c0_g1_i2	ppa_stranded_DN30092_c0_g3_i2	P10	pc05
PPA39291	ppa_stranded_DN30818_c1_g1_i11	P2	pc05
PPA02793	ppa_stranded_DN39742_c0_g1_i1	P3	pc05
ppa_stranded_DN28497_c0_g2_i3	ppa_stranded_DN28497_c0_g2_i3	P5	pc05
PPA35818	ppa_stranded_DN30814_c2_g7_i8	P4	pc05
PPA11612	ppa_stranded_DN28419_c0_g1_i1	P2	pc05
ppa_stranded_DN30418_c0_g1_i3	ppa_stranded_DN30418_c0_g1_i5	P5	pc05
PPA05136	ppa_stranded_DN28879_c0_g2_i1	P4	pc05
PPA12732	ppa_stranded_DN23366_c0_g1_i1	P4	pc05
ppa_stranded_DN31433_c3_g4_i1	ppa_stranded_DN31433_c3_g4_i1	P3	pc05
PPA34628	ppa_stranded_DN15759_c0_g2_i1	P3	pc05
ppa_stranded_DN24089_c0_g2_i3	ppa_stranded_DN24089_c0_g2_i3	P5	pc05
PPA01850	ppa_stranded_DN21982_c0_g1_i1	P3	pc05
PPA27070	ppa_stranded_DN26532_c0_g1_i1	P4	pc06
PPA23636	ppa_stranded_DN4318_c0_g1_i1	P3	pc06
PPA33630	ppa_stranded_DN30968_c0_g5_i1	P11	pc06
PPA14599	ppa_stranded_DN17634_c0_g1_i2	P11	pc06
PPA02113	ppa_stranded_DN2654_c0_g2_i1	P2	pc06
PPA10730	ppa_stranded_DN20024_c0_g1_i2	P5	pc06
Iso_D.10133.1	ppa_stranded_DN31352_c5_g3_i2	P4	pc06
ppa_stranded_DN29637_c1_g1_i8	ppa_stranded_DN29637_c1_g1_i8	P11	pc06
PPA18683	ppa_stranded_DN43927_c0_g1_i1	P9	pc07
PPA38513	ppa_stranded_DN31084_c0_g1_i4	P5	pc07
PPA11727	ppa_stranded_DN30571_c0_g1_i1	P9	pc07
PPA18699	ppa_stranded_DN24442_c0_g1_i1	P3	pc07
PPA39553	ppa_stranded_DN16197_c0_g1_i2	P2	pc07
PPA37357	ppa_stranded_DN29631_c0_g2_i2	P7	pc07
PPA03265	ppa_stranded_DN23642_c0_g1_i5	P11	pc07
PPA03037	ppa_stranded_DN29765_c0_g1_i1	P3	pc07
PPA37714	ppa_stranded_DN21526_c0_g1_i1	P3	pc07
Contig173-snapTAU.14	ppa_stranded_DN30884_c0_g1_i1	P9	pc07
PPA02511	ppa_stranded_DN28265_c0_g1_i3	P2	pc07
ppa_stranded_DN26030_c0_g2_i1	ppa_stranded_DN26030_c0_g2_i1	P8	pc07
PPA17541	ppa_stranded_DN19895_c0_g1_i2	P5	pc07
PPA23707	ppa_stranded_DN31085_c0_g2_i6	P5	pc07
PPA30761	ppa_stranded_DN20258_c0_g2_i1	P2	pc07
PPA36041	ppa_stranded_DN18032_c0_g1_i1	P4	pc07
PPA20403	ppa_stranded_DN27156_c0_g1_i5	P11	pc08
PPA39450	ppa_stranded_DN31494_c1_g8_i1	P3	pc08
PPA35429	ppa_stranded_DN25518_c0_g1_i1	P2	pc08
ppa_stranded_DN24864_c0_g1_i1	ppa_stranded_DN24864_c0_g1_i1	P4	pc08
isototal.1523.1	ppa_stranded_DN27740_c0_g2_i1	P6	pc08
ppa_stranded_DN30645_c5_g1_i1	ppa_stranded_DN30931_c0_g5_i3	P6	pc08
ppa_stranded_DN26811_c1_g1_i1	ppa_stranded_DN26811_c1_g1_i1	P9	pc08
PPA41312	ppa_stranded_DN24226_c0_g1_i2	P11	pc08
PPA10248	ppa_stranded_DN26123_c0_g1_i1	P2	pc08
ppa_stranded_DN26329_c0_g1_i2	ppa_stranded_DN26329_c0_g1_i2	P2	pc08
ppa_stranded_DN31100_c0_g4_i1	ppa_stranded_DN31100_c0_g4_i1	P2	pc08
PPA18992	ppa_stranded_DN31873_c0_g1_i1	P8	pc08
PPA07794	ppa_stranded_DN3717_c0_g2_i1	P4	pc08
ppa_stranded_DN26763_c0_g1_i1	ppa_stranded_DN26763_c0_g1_i1	P2	pc08
PPA35894	ppa_stranded_DN27386_c0_g1_i1	P6	pc08
PPA35387	ppa_stranded_DN599_c0_g1_i1	P4	pc08
ppa_stranded_DN30659_c1_g2_i1	ppa_stranded_DN30659_c1_g2_i1	P8	pc08
ppa_stranded_DN29949_c0_g1_i5	ppa_stranded_DN29949_c0_g1_i2	P7	pc08
ppa_stranded_DN30541_c5_g2_i1	ppa_stranded_DN30541_c5_g2_i1	P4	pc09
PPA36629	ppa_stranded_DN31560_c1_g1_i1	P6	pc09
ppa_stranded_DN23035_c0_g1_i1	ppa_stranded_DN23035_c0_g1_i1	P11	pc09
isopolya.5614.1	ppa_stranded_DN31080_c2_g4_i1	P3	pc09
PPA01788	ppa_stranded_DN31463_c4_g5_i1	P9	pc09
PPA32019	ppa_stranded_DN26074_c0_g1_i2	P7	pc09
PPA35736	ppa_stranded_DN26520_c1_g5_i2	P10	pc09
ppa_stranded_DN29764_c1_g2_i2	ppa_stranded_DN29764_c1_g2_i2	P5	pc09
ppa_stranded_DN31595_c6_g11_i2	ppa_stranded_DN31595_c6_g11_i1	P11	pc09
PPA23545	ppa_stranded_DN46285_c0_g1_i1	P3	pc09
PPA05846	ppa_stranded_DN16524_c0_g1_i1	P4	pc09
PPA08725	ppa_stranded_DN31145_c2_g3_i2	P4	pc09
PPA07576	ppa_stranded_DN26499_c0_g1_i3	P11	pc09
PPA35683	ppa_stranded_DN20537_c0_g1_i2	P9	pc09
ppa_stranded_DN29299_c0_g3_i1	ppa_stranded_DN29299_c0_g1_i1	P3	pc09
PPA25035	ppa_stranded_DN23358_c0_g1_i1	P2	pc09
ppa_stranded_DN27467_c0_g2_i1	ppa_stranded_DN27467_c0_g2_i1	P6	pc09
ppa_stranded_DN25263_c0_g1_i1	ppa_stranded_DN25263_c0_g1_i1	P3	pc09
ppa_stranded_DN21901_c0_g1_i1	ppa_stranded_DN21901_c0_g1_i1	P3	pc09
PPA36139	ppa_stranded_DN15760_c0_g1_i1	P9	pc09
UMM-S13-9.39-mRNA-1_frag	ppa_stranded_DN30806_c0_g2_i1	P2	pc09
PPA02482	ppa_stranded_DN31142_c3_g2_i7	P5	pc09
PPA43391	ppa_stranded_DN30908_c0_g2_i1	P4	pc09
PPA17384	ppa_stranded_DN25670_c0_g1_i2	P2	pc09
Iso_D.8499.1	ppa_stranded_DN30424_c2_g1_i1	P5	pc09
PPA24967	ppa_stranded_DN25062_c0_g1_i1	P9	pc09
PPA18595	ppa_stranded_DN30299_c1_g4_i2	P6	pc09
ppa_stranded_DN31079_c1_g4_i5	ppa_stranded_DN31079_c1_g4_i5	P3	pc09
PPA43233	ppa_stranded_DN30303_c0_g1_i3	P3	pc09
PPA33737	ppa_stranded_DN29841_c0_g2_i2	P5	pc09
ppa_stranded_DN17490_c0_g1_i1	ppa_stranded_DN17490_c0_g1_i1	P9	pc09
PPA28208	ppa_stranded_DN21931_c0_g2_i1	P11	pc09
PPA01528	ppa_stranded_DN20504_c0_g1_i1	P7	pc09
PPA44008	ppa_stranded_DN25192_c0_g1_i1	P2	pc09
PPA08235	ppa_stranded_DN25881_c0_g1_i1	P5	pc09
PPA43180	ppa_stranded_DN48318_c0_g1_i1	P3	pc10
PPA15215	ppa_stranded_DN29221_c0_g1_i1	P3	pc10
PPA02431	ppa_stranded_DN8869_c0_g1_i1	P4	pc10
ppa_stranded_DN21563_c0_g1_i1	ppa_stranded_DN21563_c0_g1_i1	P3	pc10
PPA41155	ppa_stranded_DN31100_c0_g7_i2	P11	pc10
PPA09196	ppa_stranded_DN37178_c0_g1_i1	P3	pc10
ppa_stranded_DN15672_c0_g1_i1	ppa_stranded_DN15672_c0_g1_i1	P3	pc10
PPA02353	ppa_stranded_DN24511_c0_g1_i1	P9	pc10
PPA25310	ppa_stranded_DN22697_c0_g1_i2	P4	pc10
PPA34147	ppa_stranded_DN30970_c4_g1_i2	P2	pc10
PPA42155	ppa_stranded_DN26844_c0_g1_i1	P2	pc10
ppa_stranded_DN27780_c0_g1_i3	ppa_stranded_DN27780_c0_g1_i1	P11	pc10
ppa_stranded_DN19286_c0_g1_i1	ppa_stranded_DN19286_c0_g1_i1	P4	pc10
PPA25699	ppa_stranded_DN30666_c4_g7_i1	P5	pc10
ppa_stranded_DN24730_c0_g1_i3	ppa_stranded_DN24730_c0_g1_i1	P9	pc10
PPA05013	ppa_stranded_DN30086_c0_g2_i12	P3	pc10
PPA09212	ppa_stranded_DN18417_c0_g1_i1	P4	pc10
PPA38773	ppa_stranded_DN31122_c1_g1_i1	P7	pc10
PPA27513	ppa_stranded_DN20289_c0_g1_i1	P4	pc10
PPA04186	ppa_stranded_DN25889_c0_g1_i1	P2	pc10
ppa_stranded_DN18133_c0_g1_i1	ppa_stranded_DN18133_c0_g1_i1	P4	pc10
PPA22908	ppa_stranded_DN25983_c0_g1_i2	P7	pc10
ppa_stranded_DN26777_c0_g1_i4	ppa_stranded_DN26777_c0_g1_i5	P11	pc10
PPA28672	ppa_stranded_DN17924_c0_g1_i2	P9	pc10
PPA23573	ppa_stranded_DN26597_c0_g2_i1	P4	pc10
PPA15954	ppa_stranded_DN26484_c0_g2_i2	P4	pc10
PPA33960	ppa_stranded_DN1123_c0_g1_i1	P6	pc10
PPA07259	ppa_stranded_DN28666_c0_g2_i1	P9	pc11
PPA04660	ppa_stranded_DN38427_c0_g1_i1	P3	pc11
ppa_stranded_DN31305_c1_g1_i3	ppa_stranded_DN31305_c1_g1_i3	P4	pc11
ppa_stranded_DN31579_c1_g1_i2	ppa_stranded_DN31579_c1_g1_i2	P6	pc11
ppa_stranded_DN31505_c2_g2_i2	ppa_stranded_DN31505_c2_g2_i1	P2	pc11
PPA07385	ppa_stranded_DN29821_c0_g1_i7	P3	pc11
PPA19973	ppa_stranded_DN18735_c0_g1_i1	P6	pc11
Iso_D.1006.1	ppa_stranded_DN22604_c0_g1_i1	P2	pc11
PPA12629	ppa_stranded_DN30976_c0_g2_i2	P2	pc11
PPA19597	ppa_stranded_DN28728_c0_g2_i1	P4	pc11
PPA06639	ppa_stranded_DN23792_c0_g1_i2	P3	pc11
ppa_stranded_DN31449_c0_g1_i1	ppa_stranded_DN31449_c0_g1_i2	P3	pc11
PPA07262	ppa_stranded_DN28333_c0_g1_i2	P9	pc11
PPA44706	ppa_stranded_DN28938_c3_g4_i2	P7	pc11
PPA16411	ppa_stranded_DN27828_c1_g2_i1	P5	pc11
PPA16386	ppa_stranded_DN26501_c0_g1_i3	P6	pc11
PPA28043	ppa_stranded_DN16822_c0_g1_i1	P2	pc11
ppa_stranded_DN24871_c0_g1_i2	ppa_stranded_DN24871_c0_g1_i2	P4	pc11
PPA21740	ppa_stranded_DN25934_c0_g1_i8	P4	pc11
ppa_stranded_DN26425_c0_g2_i1	ppa_stranded_DN26425_c0_g2_i1	P6	pc11
ppa_stranded_DN28412_c0_g3_i3	ppa_stranded_DN28412_c0_g3_i3	P2	pc11
PPA07913	ppa_stranded_DN22532_c0_g1_i1	P4	pc11
PPA17916	ppa_stranded_DN2078_c0_g2_i1	P7	pc11
PPA06697	ppa_stranded_DN18602_c0_g1_i1	P5	pc11
PPA26159	ppa_stranded_DN23037_c0_g1_i1	P7	pc11
PPA29068	ppa_stranded_DN27920_c0_g1_i3	P3	pc11
PPA26374	ppa_stranded_DN23698_c1_g1_i1	P3	pc11
PPA31158	ppa_stranded_DN17419_c0_g1_i1	P2	pc12
ppa_stranded_DN7652_c0_g2_i1	ppa_stranded_DN7652_c0_g2_i1	P11	pc12
ppa_stranded_DN31502_c0_g1_i2	ppa_stranded_DN31502_c0_g1_i2	P3	pc12
PPA33236	ppa_stranded_DN16618_c0_g1_i2	P3	pc12
PPA03189	ppa_stranded_DN4289_c0_g1_i1	P8	pc12
ppa_stranded_DN29971_c0_g1_i2	ppa_stranded_DN29971_c0_g1_i2	P3	pc12
PPA04281	ppa_stranded_DN4082_c0_g1_i1	P4	pc12
PPA24534	ppa_stranded_DN31050_c0_g2_i1	P2	pc12
PPA24091	ppa_stranded_DN11087_c0_g1_i1	P5	pc12
ppa_stranded_DN31310_c3_g1_i1	ppa_stranded_DN31310_c3_g1_i1	P11	pc12
ppa_stranded_DN27197_c0_g1_i1	ppa_stranded_DN27197_c0_g1_i3	P3	pc12
PPA02645	ppa_stranded_DN23931_c0_g2_i1	P5	pc12
PPA19537	ppa_stranded_DN21434_c1_g1_i1	P10	pc12
PPA34666	ppa_stranded_DN30081_c2_g1_i2	P7	pc12
PPA07817	ppa_stranded_DN24242_c0_g1_i1	P3	pc12
PPA19042	ppa_stranded_DN19849_c0_g1_i1	P2	pc12
PPA06529	ppa_stranded_DN28974_c0_g1_i4	P2	pc12
ppa_stranded_DN23779_c0_g1_i2	ppa_stranded_DN23779_c0_g1_i1	P2	pc12
PPA19569	ppa_stranded_DN30094_c0_g1_i1	P10	pc12
PPA13368	ppa_stranded_DN23215_c0_g1_i2	P3	pc12
PPA15179	ppa_stranded_DN29093_c0_g2_i2	P7	pc12
ppa_stranded_DN8088_c0_g2_i1	ppa_stranded_DN8088_c0_g2_i1	P3	pc12
ppa_stranded_DN28225_c0_g1_i2	ppa_stranded_DN28225_c0_g1_i3	P2	pc12
PPA10030	ppa_stranded_DN21657_c0_g2_i1	P4	pc12
PPA17556	ppa_stranded_DN16403_c0_g1_i1	P2	pc12
PPA27317	ppa_stranded_DN9516_c0_g1_i1	P7	pc12
Iso_D.7900.2	ppa_stranded_DN30549_c0_g1_i4	P9	pc12
PPA23240	ppa_stranded_DN28833_c0_g2_i1	P3	pc12
PPA35036	ppa_stranded_DN30493_c4_g4_i6	P10	pc12
PPA22614	ppa_stranded_DN29756_c0_g1_i3	P3	pc12
PPA21651	ppa_stranded_DN28208_c0_g1_i4	P9	pc12
PPA24968	ppa_stranded_DN28079_c0_g1_i1	P2	pc12
ppa_stranded_DN25233_c0_g1_i1	ppa_stranded_DN25233_c0_g1_i1	P2	pc12
PPA34596	ppa_stranded_DN30968_c0_g4_i2	P3	pc12
ppa_stranded_DN30080_c0_g1_i2	ppa_stranded_DN30080_c0_g1_i4	P2	pc12
PPA05005	ppa_stranded_DN4253_c0_g1_i1	P8	pc12
PPA02912	ppa_stranded_DN31540_c4_g10_i1	P9	pc12
ppa_stranded_DN5529_c0_g1_i1	ppa_stranded_DN5529_c0_g1_i1	P8	pc12
ppa_stranded_DN30653_c0_g1_i1	ppa_stranded_DN30653_c0_g1_i2	P3	pc12
PPA33543	ppa_stranded_DN39775_c0_g1_i1	P8	pc12
PPA22957	ppa_stranded_DN18466_c0_g1_i1	P11	pc12
PPA28727	ppa_stranded_DN28946_c0_g1_i5	P1	pc12
PPA17840	ppa_stranded_DN17938_c0_g1_i1	P6	pc12
PPA35462	ppa_stranded_DN26767_c2_g1_i1	P3	pc12
PPA03345	ppa_stranded_DN25347_c0_g1_i1	P2	pc12
ppa_stranded_DN15378_c0_g1_i2	ppa_stranded_DN15378_c0_g1_i1	P1	pc12
PPA00162	ppa_stranded_DN22616_c0_g1_i1	P11	pc12
PPA08458	ppa_stranded_DN24472_c0_g1_i1	P4	pc12
PPA05620	ppa_stranded_DN28032_c0_g2_i2	P2	pc12
PPA08180	ppa_stranded_DN22642_c0_g1_i1	P11	pc12
ppa_stranded_DN23014_c0_g1_i1	ppa_stranded_DN23014_c0_g1_i1	P3	pc12
ppa_stranded_DN20124_c0_g1_i1	ppa_stranded_DN20124_c0_g1_i1	P8	pc12
PPA28537	ppa_stranded_DN23299_c0_g1_i2	P11	pc12
ppa_stranded_DN26958_c0_g1_i1	ppa_stranded_DN26958_c0_g1_i1	P6	pc12
PPA18871	ppa_stranded_DN26243_c0_g1_i1	P11	pc12
PPA35599	ppa_stranded_DN26631_c0_g1_i4	P9	pc12
ppa_stranded_DN9149_c0_g1_i1	ppa_stranded_DN9149_c0_g1_i1	P7	pc12
PPA26819	ppa_stranded_DN22069_c0_g1_i1	P4	pc12
ppa_stranded_DN18163_c0_g1_i1	ppa_stranded_DN18163_c0_g1_i1	P3	pc12
