# Supplementary material for: Single worm transcriptomics identifies a developmental core network of oscillating genes with deep conservation across nematodes
Source: HighWire-hosted journal article supplement (doi:10.1101/gr.275303.121), 2021-07-22
Supplement: Supplemental_Table_S12.xlsx [file Supplemental_Table_S12.xlsx]

## Sheet: fv_resDEseq_swt.eud1.v3
Supplemental Table S12 205 differentially expressed genes between eud-1 mutate and PS312
ppa_locus	DEG at 20h				DEG at 28h
	Regulated type	Foldchange (log2())	P-value	Adjust p-value	Regulated type	Foldchange (log2())	P-value	Adjust p-value
PPA02729	down_20h	-6.08402	2.25764e-18	1.87733e-15	down_28h	-5.99751	8.58252e-15	5.32009e-12
PPA16109	down_20h	-4.26156	1.94629e-15	1.18685e-12	down_28h	-10.338	1.74873e-23	2.89065e-20
PPA25154	down_20h	-17.8662	5.21005e-08	1.40166e-05	down_28h	-40.9685	5.47028e-30	2.71271e-26
PPA34405	down_20h	-3.47479	0.000504266	0.0413681	down_28h	-5.28091	3.24051e-06	0.00066957
PPA39113	down_20h	-3.80551	1.27162e-07	3.23098e-05	down_28h	-3.57084	8.85377e-05	0.0108409
PPA39809	down_20h	-15.2743	4.72393e-20	4.80109e-17	down_28h	-4.03076	0.00042672	0.0417159
PPA40518	down_20h	-3.02703	3.33836e-07	7.44781e-05	down_28h	-5.55239	2.42321e-16	1.84872e-13
PPA41378	down_20h	-2.24885	0.000111853	0.0120367	down_28h	-9.02123	2.16533e-16	1.78964e-13
PPA42516	down_20h	-3.98256	4.56337e-08	1.29656e-05	down_28h	-11.5924	7.24102e-16	5.12974e-13
PPA42838	down_20h	-5.64134	2.17976e-06	0.000369227	down_28h	-8.78375	4.2199e-07	0.000104632
PPA43121	down_20h	-6.63238	2.16588e-06	0.000369227	down_28h	-5.97249	8.71815e-10	3.08809e-07
PPA45088	down_20h	-2.17068	0.000149201	0.0153341	down_28h	-3.19935	3.606e-06	0.000729885
Contig74-snapTAU.96	down_20h	-3.34167	9.15533e-07	0.000182052	non_sig	0	1	1
Iso_D.10518.1	down_20h	-8.41924	6.95682e-06	0.00104318	non_sig	-5.09803	0.00669752	0.35333
Iso_D.13538.1	down_20h	-3.19817	1.92875e-07	4.6427e-05	non_sig	0.605581	0.419007	1
ppa_stranded_DN17179_c0_g1_i1	down_20h	-17.3808	1.99735e-24	2.28372e-21	non_sig	0.574687	0.66793	1
ppa_stranded_DN18000_c0_g1_i1	down_20h	-4.73535	3.27803e-08	9.67231e-06	non_sig	-3.8727	0.0122097	0.54303
ppa_stranded_DN18842_c0_g1_i1	down_20h	-5.7471	5.19342e-05	0.0063339	non_sig	0.0543083	0.972596	1
ppa_stranded_DN20569_c0_g1_i1	down_20h	-1.79331	0.000435052	0.0375417	non_sig	1.28736	0.0385541	1
ppa_stranded_DN26834_c0_g1_i2	down_20h	-3.35133	3.60154e-05	0.00470618	non_sig	2.16385	0.0529109	1
ppa_stranded_DN26871_c0_g1_i2	down_20h	-2.775	6.72575e-05	0.0077874	non_sig	0.111292	0.906261	1
ppa_stranded_DN27784_c0_g1_i3	down_20h	-3.273	0.000579355	0.0460814	non_sig	0.00204306	0.998661	1
ppa_stranded_DN28325_c0_g2_i1	down_20h	-3.27658	6.8426e-05	0.00782366	non_sig	0.0650495	0.953518	1
ppa_stranded_DN32738_c0_g1_i1	down_20h	-5.58856	2.52186e-06	0.000411919	non_sig	-3.70846	0.0108838	0.51159
ppa_stranded_DN50541_c0_g1_i1	down_20h	-2.5197	0.000339909	0.0307836	non_sig	1.3681	0.167094	1
PPA00693	down_20h	-2.49703	0.000476839	0.0396513	non_sig	0.880657	0.362884	1
PPA02713	down_20h	-4.56752	3.20432e-07	7.32748e-05	non_sig	-0.625614	0.588224	1
PPA03146	down_20h	-7.07841	0.000111625	0.0120367	non_sig	0	1	1
PPA04213	down_20h	-12.6423	4.67767e-08	1.29656e-05	non_sig	-0.0669148	0.971178	1
PPA05620	down_20h	-3.95722	2.89947e-07	6.80038e-05	non_sig	-1.62876	0.122595	1
PPA08182	down_20h	-4.06922	8.48078e-09	2.67496e-06	non_sig	1.0364	0.236628	1
PPA11114	down_20h	-1.69348	0.000461893	0.0394275	non_sig	0.572955	0.351884	1
PPA11618	down_20h	-7.38895	0.000273137	0.0260249	non_sig	-7.59762	0.00116606	0.0971845
PPA12678	down_20h	-15.7648	3.68102e-11	1.68351e-08	non_sig	-0.628989	0.782126	1
PPA12679	down_20h	-13.8289	7.00581e-09	2.28865e-06	non_sig	2.38334	0.262124	1
PPA13818	down_20h	-3.35227	1.5628e-05	0.0021659	non_sig	-0.0837414	0.942477	1
PPA14222	down_20h	-12.7671	1.34035e-12	7.21187e-10	non_sig	0.979416	0.251217	1
PPA15131	down_20h	-4.73461	1.89812e-07	4.6427e-05	non_sig	1.0027	0.362092	1
PPA16241	down_20h	-4.94033	5.95224e-06	0.000922799	non_sig	-0.490397	0.703809	1
PPA16538	down_20h	-2.88213	0.00028309	0.026674	non_sig	-0.880904	0.389695	1
PPA16539	down_20h	-8.1	6.04263e-12	3.07066e-09	non_sig	0	1	1
PPA20982	down_20h	-3.52417	4.3698e-05	0.00555147	non_sig	1.69361	0.126191	1
PPA22069	down_20h	-4.1035	1.28239e-06	0.000244375	non_sig	-0.246974	0.810762	1
PPA22281	down_20h	-4.08831	0.000150886	0.015335	non_sig	-3.89556	0.01151	0.518891
PPA25211	down_20h	-3.26242	1.6769e-05	0.00228934	non_sig	-0.289932	0.777569	1
PPA25920	down_20h	-4.97324	4.56955e-05	0.00572571	non_sig	0	1	1
PPA27306	down_20h	-3.22736	0.000465526	0.0394275	non_sig	-1.54502	0.212397	1
PPA29058	down_20h	-4.94475	2.01639e-06	0.000354691	non_sig	-3.03737	0.0332803	1
PPA30186	down_20h	-3.38096	9.00144e-05	0.010165	non_sig	-0.833229	0.315108	1
PPA33931	down_20h	-4.44527	9.76838e-10	3.43659e-07	non_sig	0.293095	0.723269	1
PPA35164	down_20h	-2.55762	0.000128099	0.013315	non_sig	-1.53742	0.082852	1
PPA35432	down_20h	-16.8051	5.97609e-16	3.90452e-13	non_sig	-2.34931	0.211533	1
PPA36791	down_20h	-3.19923	8.11419e-07	0.000168683	non_sig	-1.24187	0.194343	1
PPA39724	down_20h	-6.66472	2.65889e-11	1.28005e-08	non_sig	-4.79838	0.00506653	0.277623
PPA40307	down_20h	-3.6455	4.69962e-05	0.00580911	non_sig	-0.434955	0.690876	1
PPA40768	down_20h	-6.49891	5.89217e-05	0.00699944	non_sig	-5.45262	0.00871327	0.440861
PPA42024	down_20h	-3.90086	1.19439e-06	0.000232449	non_sig	0.929304	0.406964	1
PPA42876	down_20h	-8.57046	1.35133e-06	0.000252258	non_sig	-4.37175	0.0361256	1
PPA42968	down_20h	-4.27025	0.000238641	0.0235311	non_sig	0.519233	0.705175	1
Iso_D.13540.1	non_sig	-0.107506	0.875287	1	down_28h	-5.1712	2.44882e-10	9.8515e-08
Iso_D.7605.3	non_sig	-0.684409	0.446263	1	down_28h	-5.3975	1.153e-06	0.000259896
isopolya.5496.1	non_sig	0.595965	0.723294	1	down_28h	-8.17809	0.000138682	0.0152828
ppa_stranded_DN20414_c0_g1_i4	non_sig	-2.55342	0.0746793	0.905903	down_28h	-8.03073	3.22805e-07	8.20919e-05
ppa_stranded_DN25761_c0_g1_i1	non_sig	0.609471	0.563345	1	down_28h	-5.14933	6.4268e-05	0.00817192
ppa_stranded_DN26832_c0_g1_i1	non_sig	0	1	1	down_28h	-5.49888	0.00031886	0.0322699
ppa_stranded_DN27422_c0_g1_i3	non_sig	0.534264	0.770909	1	down_28h	-8.85439	0.000181044	0.0197318
ppa_stranded_DN30459_c0_g1_i6	non_sig	-0.406918	0.611386	1	down_28h	-9.88816	1.67503e-23	2.89065e-20
ppa_stranded_DN30710_c0_g1_i4	non_sig	-0.511617	0.731824	1	down_28h	-9.69405	1.78315e-06	0.000384463
ppa_stranded_DN31254_c1_g7_i7	non_sig	-0.954743	0.283776	1	down_28h	-5.30039	1.43417e-05	0.00235863
ppa_stranded_DN31433_c3_g4_i1	non_sig	-2.27047	0.0104545	0.331643	down_28h	-7.33582	9.09032e-06	0.00163923
PPA00310	non_sig	-0.307256	0.556644	1	down_28h	-6.52541	2.81126e-18	2.78821e-15
PPA00818	non_sig	0.0115844	0.991987	1	down_28h	-6.67553	9.40136e-07	0.000216844
PPA01432	non_sig	0.665461	0.597537	1	down_28h	-8.81699	4.41256e-06	0.000875276
PPA03364	non_sig	0.332789	0.673094	1	down_28h	-5.18555	0.000128243	0.0147897
PPA04724	non_sig	0.0267304	0.994694	1	down_28h	-24.7809	5.26442e-08	1.45035e-05
PPA05087	non_sig	-0.516402	0.381094	1	down_28h	-8.14544	1.28375e-08	3.85825e-06
PPA05772	non_sig	-0.0896492	0.87623	1	down_28h	-8.07321	2.09404e-22	2.96695e-19
PPA06300	non_sig	2.24071	0.0626994	0.844641	down_28h	-6.74545	0.000405334	0.040201
PPA07193	non_sig	-1.45284	0.174948	1	down_28h	-3.16888	1.49822e-05	0.00235863
PPA08503	non_sig	0.386425	0.619067	1	down_28h	-6.28355	2.48324e-10	9.8515e-08
PPA10003	non_sig	-1.58128	0.0347441	0.660716	down_28h	-10.465	2.907e-12	1.37293e-09
PPA10212	non_sig	-1.98847	0.0034354	0.158149	down_28h	-4.63018	1.49472e-07	4.00666e-05
PPA13364	non_sig	-1.82987	0.0170656	0.46458	down_28h	-7.53845	1.43492e-06	0.000316257
PPA14172	non_sig	0.998603	0.220468	1	down_28h	-6.56834	4.57577e-05	0.00613276
PPA15490	non_sig	-1.39964	0.285527	1	down_28h	-8.34691	1.46398e-05	0.00235863
PPA17251	non_sig	-1.38629	0.058947	0.824446	down_28h	-6.02344	0.000116452	0.0137496
PPA22191	non_sig	-2.58724	0.0350326	0.661575	down_28h	-7.3192	0.000111098	0.0132755
PPA24566	non_sig	0.96722	0.372768	1	down_28h	-4.95187	0.000274357	0.0283445
PPA25921	non_sig	-1.57894	0.0710306	0.890702	down_28h	-6.63265	2.44571e-09	7.8247e-07
PPA27186	non_sig	-1.17804	0.08379	0.9329	down_28h	-6.80614	5.66599e-06	0.00110187
PPA30177	non_sig	0.00805923	0.992244	1	down_28h	-6.97603	1.62579e-05	0.00251947
PPA30813	non_sig	0.932193	0.491213	1	down_28h	-8.49004	2.31647e-05	0.00342907
PPA31045	non_sig	2.02774	0.143787	1	down_28h	-7.70877	0.000183412	0.0197726
PPA32893	non_sig	0.570718	0.564777	1	down_28h	-10.281	8.71256e-10	3.08809e-07
PPA33220	non_sig	-4.44731	0.00344065	0.158149	down_28h	-7.89071	0.000187818	0.0200299
PPA33236	non_sig	-3.02184	0.000857421	0.0610924	down_28h	-4.36301	0.000132612	0.0151177
PPA33588	non_sig	0.28635	0.652481	1	down_28h	-10.5625	6.04902e-14	3.33301e-11
PPA33590	non_sig	0.444391	0.455563	1	down_28h	-10.0252	5.91912e-13	3.08978e-10
PPA34596	non_sig	-1.74107	0.25145	1	down_28h	-7.97888	2.98139e-06	0.000629136
PPA34598	non_sig	-3.51121	0.0857337	0.944663	down_28h	-25.8581	4.82577e-25	1.19655e-21
PPA34600	non_sig	-1.521	0.455146	1	down_28h	-26.847	4.88632e-30	2.71271e-26
PPA35466	non_sig	-1.97661	0.0255666	0.56893	down_28h	-4.1808	0.000341359	0.034198
PPA35588	non_sig	-0.0679411	0.967531	1	down_28h	-7.76562	1.28153e-05	0.00219141
PPA35797	non_sig	1.91207	0.226493	1	down_28h	-7.23156	0.000119183	0.0139066
PPA36656	non_sig	-0.021703	0.986883	1	down_28h	-6.90655	6.38434e-06	0.00119472
PPA36967	non_sig	0.102224	0.876969	1	down_28h	-5.47608	2.42303e-09	7.8247e-07
PPA36968	non_sig	0.239734	0.67633	1	down_28h	-6.66695	8.30961e-19	9.15719e-16
PPA37604	non_sig	1.10728	0.481547	1	down_28h	-5.84822	0.000451971	0.0435208
PPA37780	non_sig	1.05776	0.15647	1	down_28h	-3.8712	6.04624e-06	0.0011532
PPA38787	non_sig	-1.42235	0.0148269	0.430545	down_28h	-6.16791	3.38423e-19	4.1956e-16
PPA39114	non_sig	0.681459	0.176651	1	down_28h	-3.85793	5.11276e-10	1.95032e-07
PPA39567	non_sig	-0.888479	0.400882	1	down_28h	-7.97248	7.98225e-06	0.00146607
PPA40691	non_sig	-1.64907	0.00601948	0.234905	down_28h	-7.5547	5.14123e-26	1.69969e-22
PPA42913	non_sig	-0.554209	0.4249	1	down_28h	-7.22569	4.06084e-14	2.36914e-11
PPA43246	non_sig	-1.33932	0.315965	1	down_28h	-7.49174	5.49275e-05	0.00716804
PPA45398	non_sig	1.33599	0.215031	1	down_28h	-6.3506	0.000517052	0.0488393
Iso_D.6554.1	non_sig	0	1	1	up_28h	4.92215	1.49293e-05	0.00235863
Iso_D.6600.2	non_sig	0	1	1	up_28h	9.38915	2.95484e-15	1.95374e-12
isopolya.2830.1	non_sig	-4.1506	0.00354733	0.162237	up_28h	3.57742	3.2048e-05	0.0044768
ppa_stranded_DN19944_c0_g1_i2	non_sig	-0.957231	0.590991	1	up_28h	7.20039	3.35744e-09	1.0406e-06
ppa_stranded_DN21997_c0_g1_i1	non_sig	1.41245	0.111713	1	up_28h	5.45945	1.27864e-05	0.00219141
ppa_stranded_DN23686_c0_g3_i1	non_sig	-2.35113	0.146803	1	up_28h	4.49333	4.69724e-05	0.00621163
ppa_stranded_DN24091_c0_g1_i1	non_sig	0	1	1	up_28h	4.63304	7.20324e-07	0.000170099
ppa_stranded_DN24394_c0_g1_i2	non_sig	-0.382104	0.662624	1	up_28h	3.67323	0.000509641	0.0486021
ppa_stranded_DN26019_c0_g1_i1	non_sig	-1.35268	0.11048	1	up_28h	3.5515	2.30573e-05	0.00342907
ppa_stranded_DN29565_c0_g1_i1	non_sig	-0.436041	0.568124	1	up_28h	4.41764	0.000233208	0.024347
ppa_stranded_DN30975_c0_g1_i5	non_sig	1.8417	0.289941	1	up_28h	4.32293	5.92568e-05	0.00763259
ppa_stranded_DN31181_c2_g1_i1	non_sig	2.16824	0.00237743	0.127141	up_28h	3.8718	2.5311e-05	0.00363817
ppa_stranded_DN31502_c0_g1_i2	non_sig	0.573008	0.585419	1	up_28h	5.72003	0.000103195	0.0124816
ppa_stranded_DN9121_c0_g1_i1	non_sig	-0.0760154	0.937973	1	up_28h	4.99891	4.18706e-05	0.00568866
PPA01528	non_sig	3.06728	0.0442689	0.732847	up_28h	8.1001	7.73146e-11	3.33394e-08
PPA02463	non_sig	3.45476	0.0195783	0.503041	up_28h	6.89235	1.1841e-12	5.87195e-10
PPA07004	non_sig	-2.18786	0.185221	1	up_28h	4.85812	2.4129e-05	0.00351928
PPA07225	non_sig	-0.385418	0.653754	1	up_28h	4.07089	0.000137663	0.0152828
PPA11836	non_sig	-1.13962	0.184221	1	up_28h	6.03227	2.59295e-08	7.56377e-06
PPA13248	non_sig	-0.108871	0.967934	1	up_28h	22.8738	8.05621e-12	3.63188e-09
PPA13966	non_sig	-3.04541	0.0327061	0.639401	up_28h	3.21117	7.33123e-05	0.00920394
PPA15530	non_sig	0	1	1	up_28h	6.36346	2.92224e-07	7.62704e-05
PPA17448	non_sig	0.827772	0.40438	1	up_28h	5.91295	1.93096e-05	0.00294635
PPA17896	non_sig	1.09086	0.14129	1	up_28h	4.87701	2.08852e-09	7.14273e-07
PPA18215	non_sig	0	1	1	up_28h	4.97806	2.92672e-05	0.00414675
PPA22039	non_sig	0	1	1	up_28h	5.32655	0.00042902	0.0417159
PPA22473	non_sig	-1.98558	0.0524693	0.78421	up_28h	4.49795	6.63031e-07	0.000160389
PPA25309	non_sig	-0.658075	0.450988	1	up_28h	3.8869	0.000191982	0.0202561
PPA31040	non_sig	3.99817	0.0129998	0.388592	up_28h	6.30632	1.3084e-05	0.00219944
PPA35582	non_sig	1.80284	0.00385576	0.171207	up_28h	3.32771	4.0981e-05	0.00564513
PPA40606	non_sig	0	1	1	up_28h	3.2238	0.00013528	0.0152466
ppa_stranded_DN16577_c0_g1_i1	up_20h	20.108	8.95072e-07	0.000181938	down_28h	-25.1452	3.09975e-08	8.78382e-06
PPA16697	up_20h	8.86133	6.50545e-10	2.38022e-07	down_28h	-8.95453	1.11238e-05	0.0019701
PPA26388	up_20h	19.7654	1.64098e-14	9.3813e-12	down_28h	-24.4654	4.55401e-18	4.10606e-15
Iso_D.10917.2	up_20h	6.65225	0.000338801	0.0307836	non_sig	0.221628	0.901906	1
Iso_D.11220.1	up_20h	7.34226	0.000297686	0.0275044	non_sig	-1.05139	0.644009	1
Iso_D.3074.1	up_20h	18.8932	7.69731e-35	1.40815e-31	non_sig	0.518076	0.635598	1
Iso_D.7491.1	up_20h	7.93752	5.3927e-05	0.0064904	non_sig	0.354068	0.856557	1
Iso_D.987.1	up_20h	6.43157	1.11091e-05	0.00158773	non_sig	1.59766	0.154739	1
ppa_stranded_DN14532_c0_g1_i1	up_20h	17.789	2.48264e-26	3.24411e-23	non_sig	-0.968744	0.420629	1
ppa_stranded_DN19307_c0_g2_i1	up_20h	2.21082	0.000190033	0.0191015	non_sig	1.41856	0.0358378	1
ppa_stranded_DN20038_c0_g1_i2	up_20h	3.73331	0.000239247	0.0235311	non_sig	3.71195	0.00179184	0.138839
ppa_stranded_DN20930_c0_g1_i1	up_20h	3.87129	2.84408e-08	8.6716e-06	non_sig	2.3738	0.00501508	0.277623
ppa_stranded_DN23087_c0_g1_i1	up_20h	8.08661	1.13104e-05	0.00159163	non_sig	-0.637693	0.721642	1
ppa_stranded_DN23592_c0_g1_i1	up_20h	15.7599	3.22891e-18	2.46124e-15	non_sig	0.715443	0.413058	1
ppa_stranded_DN25261_c0_g1_i2	up_20h	21.1744	3.50461e-44	3.20567e-40	non_sig	-0.656735	0.569675	1
ppa_stranded_DN26773_c0_g1_i6	up_20h	3.14004	0.000383751	0.0336492	non_sig	-0.183139	0.86091	1
ppa_stranded_DN26777_c0_g1_i4	up_20h	2.9227	3.22015e-05	0.00433157	non_sig	1.75862	0.0391889	1
ppa_stranded_DN26974_c0_g1_i2	up_20h	18.9576	1.73698e-33	2.64802e-30	non_sig	-1.90664	0.10479	1
ppa_stranded_DN28825_c0_g2_i1	up_20h	19.0782	4.37741e-11	1.90667e-08	non_sig	-4.84993	0.103279	1
ppa_stranded_DN29153_c1_g1_i5	up_20h	3.80977	6.25456e-07	0.000133048	non_sig	0.894924	0.351766	1
PPA02353	up_20h	4.06215	6.36201e-05	0.00746068	non_sig	1.6069	0.145848	1
PPA02503	up_20h	2.68216	3.36265e-05	0.0044577	non_sig	1.26031	0.149706	1
PPA03980	up_20h	7.11294	1.951e-06	0.000349917	non_sig	1.92405	0.109425	1
PPA04747	up_20h	2.97655	0.000571887	0.0458864	non_sig	-0.632221	0.529479	1
PPA05086	up_20h	6.78076	3.76456e-07	8.19868e-05	non_sig	-4.50533	0.0189022	0.715542
PPA06141	up_20h	2.87698	0.000592784	0.046743	non_sig	-0.850442	0.41149	1
PPA06264	up_20h	3.2369	0.000358248	0.0321264	non_sig	3.47198	0.00370774	0.226768
PPA06275	up_20h	2.53813	0.000363521	0.0322828	non_sig	0.829032	0.329101	1
PPA07837	up_20h	17.5588	2.31816e-10	8.83508e-08	non_sig	-2.51736	0.351119	1
PPA09400	up_20h	6.32873	9.199e-05	0.0102614	non_sig	3.35561	0.020715	0.753839
PPA10053	up_20h	21.1623	3.45213e-40	1.57883e-36	non_sig	-2.11826	0.0999925	1
PPA12247	up_20h	2.86801	0.000114811	0.0122114	non_sig	0.404108	0.661048	1
PPA14362	up_20h	1.82024	0.000554566	0.0448904	non_sig	-0.162796	0.813458	1
PPA15875	up_20h	6.15369	0.000255304	0.0245818	non_sig	-0.321091	0.831861	1
PPA18242	up_20h	7.14959	1.57041e-06	0.00028729	non_sig	0.99828	0.40009	1
PPA18570	up_20h	3.20032	2.97222e-06	0.000476963	non_sig	-0.982995	0.265736	1
PPA20282	up_20h	3.76844	2.40928e-06	0.000400685	non_sig	-0.745439	0.434755	1
PPA21364	up_20h	6.14257	0.000110657	0.0120367	non_sig	1.59244	0.239224	1
PPA23763	up_20h	2.09091	0.000470426	0.0394769	non_sig	1.23053	0.119505	1
PPA24467	up_20h	19.6583	7.19735e-35	1.40815e-31	non_sig	-1.95035	0.114442	1
PPA25175	up_20h	5.06778	8.123e-06	0.0011984	non_sig	0.754194	0.5717	1
PPA25742	up_20h	4.85644	3.71723e-06	0.000586232	non_sig	2.39605	0.0573796	1
PPA26627	up_20h	2.32137	4.15274e-05	0.00535001	non_sig	-0.348392	0.632239	1
PPA28408	up_20h	7.61137	0.000127336	0.013315	non_sig	1.82256	0.361326	1
PPA29617	up_20h	3.19399	0.00050653	0.0413681	non_sig	-1.35685	0.221808	1
PPA30034	up_20h	20.301	9.75896e-40	2.97551e-36	non_sig	-1.31691	0.246543	1
PPA32660	up_20h	4.39534	0.000248064	0.0241388	non_sig	2.07991	0.168293	1
PPA35611	up_20h	8.17708	9.83738e-08	2.57093e-05	non_sig	1.03018	0.427667	1
PPA36429	up_20h	6.11766	0.000386264	0.0336492	non_sig	1.12652	0.504486	1
PPA36919	up_20h	6.74179	0.000634789	0.0496275	non_sig	0.967794	0.620731	1
PPA37075	up_20h	4.44541	0.000285782	0.026674	non_sig	0.960701	0.492499	1
PPA37714	up_20h	3.24942	6.14528e-06	0.000936847	non_sig	-0.82609	0.393867	1
PPA38488	up_20h	8.85182	6.96889e-11	2.89747e-08	non_sig	0.052011	0.968464	1
PPA39021	up_20h	5.16823	1.09779e-09	3.71908e-07	non_sig	2.38524	0.0104948	0.500421
PPA39116	up_20h	15.7086	1.86315e-16	1.31094e-13	non_sig	-0.556649	0.634165	1
PPA44827	up_20h	16.826	8.76719e-19	8.01934e-16	non_sig	-2.06135	0.140024	1
ppa_stranded_DN20765_c0_g1_i3	up_20h	4.38644	1.44136e-10	5.73222e-08	up_28h	3.2419	0.000310065	0.0317033
PPA11944	up_20h	2.89922	1.02537e-05	0.00148875	up_28h	3.53819	7.44243e-05	0.00922675
