# Supplementary material for: Single worm transcriptomics identifies a developmental core network of oscillating genes with deep conservation across nematodes
Source: HighWire-hosted journal article supplement (doi:10.1101/gr.275303.121), 2021-07-22
Supplement: Supplemental_Table_S13.xlsx [file Supplemental_Table_S13.xlsx]

## Sheet: tb_exon_coverage_3.GeClass_swt_
Supplemental Table S13 Gene structure agreement between STD and SWT samples
ppa_locus	mlog2TPM of the STD samples at the last lethargus stage	Gene expression class	No. of exon in gene annotation	No. of exons supported by the STD	No. of exons supported by the SWT
ppa_stranded_DN15863_c0_g1_i2	0.936535	gene_expression_class_I	8	8	8
ppa_stranded_DN23311_c0_g1_i1	0.875324	gene_expression_class_I	9	9	4
PPA20484	0.858092	gene_expression_class_I	9	9	3
ppa_stranded_DN16622_c0_g1_i1	0.665889	gene_expression_class_I	10	10	9
ppa_stranded_DN23482_c0_g1_i1	0.603425	gene_expression_class_I	15	15	13
ppa_stranded_DN45427_c0_g1_i1	0.523232	gene_expression_class_I	9	9	9
PPA15821	0.484698	gene_expression_class_I	10	10	5
ppa_stranded_DN29567_c0_g1_i1	0.457099	gene_expression_class_I	12	12	4
Iso_D.6422.1	0.411865	gene_expression_class_I	12	12	9
PPA24452	0.0563924	gene_expression_class_I	8	8	4
PPA24961	7.99117	gene_expression_class_II	4	4	4
ppa_stranded_DN31406_c4_g5_i1	7.98696	gene_expression_class_II	10	10	10
ppa_stranded_DN25721_c0_g1_i2	7.98123	gene_expression_class_II	3	3	3
ppa_stranded_DN12957_c0_g1_i1	7.96989	gene_expression_class_II	8	8	8
PPA21103	7.96676	gene_expression_class_II	6	6	6
ppa_stranded_DN25465_c0_g2_i1	7.94712	gene_expression_class_II	5	5	5
ppa_stranded_DN27274_c0_g2_i1	7.94642	gene_expression_class_II	6	6	6
Contig71-snapTAU.14	7.89583	gene_expression_class_II	3	3	3
ppa_stranded_DN15406_c1_g1_i1	7.85652	gene_expression_class_II	4	4	4
PPA04462	7.84028	gene_expression_class_II	4	4	4
ppa_stranded_DN30141_c0_g5_i1	7.82291	gene_expression_class_II	3	3	3
PPA02446	7.81778	gene_expression_class_II	11	11	11
PPA23642	7.81282	gene_expression_class_II	22	22	22
PPA00189	7.80526	gene_expression_class_II	8	8	8
ppa_stranded_DN23291_c0_g1_i1	7.80082	gene_expression_class_II	3	3	3
PPA00013	7.7734	gene_expression_class_II	3	3	3
ppa_stranded_DN28186_c0_g1_i4	7.76032	gene_expression_class_II	5	5	5
ppa_stranded_DN4332_c0_g1_i1	7.70549	gene_expression_class_II	4	4	4
ppa_stranded_DN26429_c0_g2_i2	7.67729	gene_expression_class_II	4	4	4
PPA30613	7.6132	gene_expression_class_II	6	6	6
ppa_stranded_DN18907_c0_g3_i1	7.61232	gene_expression_class_II	4	4	4
PPA10377	7.60506	gene_expression_class_II	7	7	7
PPA01556	7.55666	gene_expression_class_II	6	6	6
PPA00540	7.42738	gene_expression_class_II	7	7	7
ppa_stranded_DN26723_c0_g1_i1	7.42623	gene_expression_class_II	3	3	3
ppa_stranded_DN30620_c1_g5_i1	7.41802	gene_expression_class_II	5	5	5
ppa_stranded_DN19514_c0_g1_i1	7.41227	gene_expression_class_II	7	7	7
ppa_stranded_DN14344_c0_g1_i1	7.38637	gene_expression_class_II	4	4	4
Contig144-snapTAU.18	7.38321	gene_expression_class_II	4	4	4
PPA17384	7.37365	gene_expression_class_II	11	11	11
PPA16869	7.37014	gene_expression_class_II	6	6	6
PPA21628	6.99695	gene_expression_class_II	13	13	13
ppa_stranded_DN25730_c0_g1_i6	6.99574	gene_expression_class_II	4	4	4
PPA04179	6.99491	gene_expression_class_II	8	8	8
ppa_stranded_DN24084_c0_g2_i1	6.98956	gene_expression_class_II	6	6	6
ppa_stranded_DN30728_c3_g2_i4	6.98045	gene_expression_class_II	4	4	4
ppa_stranded_DN7652_c0_g2_i1	6.97574	gene_expression_class_II	8	8	8
ppa_stranded_DN21981_c0_g1_i2	6.92537	gene_expression_class_II	8	8	8
PPA01098	6.92224	gene_expression_class_II	15	15	14
PPA40325	6.92181	gene_expression_class_II	4	4	4
ppa_stranded_DN20414_c0_g1_i4	6.9179	gene_expression_class_II	8	8	8
PPA33629	6.89505	gene_expression_class_II	3	3	3
ppa_stranded_DN24485_c0_g1_i1	6.86173	gene_expression_class_II	15	15	15
ppa_stranded_DN27024_c1_g1_i2	6.84921	gene_expression_class_II	14	14	14
ppa_stranded_DN19930_c0_g2_i1	6.84765	gene_expression_class_II	6	6	6
Contig3-snapTAU.38	6.84545	gene_expression_class_II	7	7	7
PPA08069	6.83722	gene_expression_class_II	3	3	3
ppa_stranded_DN30692_c0_g1_i1	6.83544	gene_expression_class_II	9	9	8
PPA39809	6.83083	gene_expression_class_II	12	12	12
ppa_stranded_DN16041_c0_g1_i1	6.8039	gene_expression_class_II	8	8	8
ppa_stranded_DN7638_c0_g1_i1	6.79384	gene_expression_class_II	12	12	12
ppa_stranded_DN7946_c0_g1_i1	6.78625	gene_expression_class_II	4	4	4
PPA08125	6.76268	gene_expression_class_II	15	15	14
ppa_stranded_DN49017_c0_g1_i1	6.74069	gene_expression_class_II	4	4	4
ppa_stranded_DN11935_c0_g1_i1	6.73379	gene_expression_class_II	7	7	7
ppa_stranded_DN31446_c1_g1_i1	6.7213	gene_expression_class_II	3	3	3
ppa_stranded_DN32399_c0_g1_i1	6.69421	gene_expression_class_II	9	9	9
ppa_stranded_DN31617_c3_g3_i1	6.5515	gene_expression_class_II	3	3	3
PPA16646	6.38022	gene_expression_class_II	12	12	12
ppa_stranded_DN20813_c0_g1_i1	6.30433	gene_expression_class_II	4	4	3
isopolya.3900.1	6.12042	gene_expression_class_II	2	2	2
PPA39182	6.10297	gene_expression_class_II	5	5	5
ppa_stranded_DN19527_c0_g2_i1	6.09968	gene_expression_class_II	5	5	5
ppa_stranded_DN16529_c0_g2_i1	6.07657	gene_expression_class_II	18	18	15
PPA25660	6.04004	gene_expression_class_II	5	5	5
PPA29710	6.02147	gene_expression_class_II	5	5	5
PPA26677	6.01469	gene_expression_class_II	9	9	9
ppa_stranded_DN20690_c0_g1_i1	5.92439	gene_expression_class_II	5	5	5
Iso_D.2066.1	5.88604	gene_expression_class_II	6	6	6
ppa_stranded_DN18064_c0_g2_i1	5.60283	gene_expression_class_II	5	5	5
PPA39283	5.48712	gene_expression_class_II	15	15	15
ppa_stranded_DN49329_c0_g1_i1	5.47122	gene_expression_class_II	2	2	2
PPA43669	5.37309	gene_expression_class_II	18	18	18
ppa_stranded_DN9017_c0_g1_i1	5.31719	gene_expression_class_II	7	7	7
PPA25985	5.2899	gene_expression_class_II	3	3	3
ppa_stranded_DN24628_c0_g2_i1	5.21342	gene_expression_class_II	6	6	5
ppa_stranded_DN31096_c1_g7_i2	5.16409	gene_expression_class_II	11	10	8
PPA44393	5.09798	gene_expression_class_II	13	13	10
PPA02143	5.03868	gene_expression_class_II	3	3	3
PS312_c13760_g1_i6	5.00505	gene_expression_class_II	6	6	6
PPA18071	4.90185	gene_expression_class_II	5	5	5
PPA01212	4.87949	gene_expression_class_II	16	16	15
PPA09719	4.84956	gene_expression_class_II	10	10	9
isototal.5785.1	4.78591	gene_expression_class_II	8	8	8
PPA35264	4.65256	gene_expression_class_II	15	15	15
Iso_D.10815.2	4.62953	gene_expression_class_II	11	11	10
isopolya.5852.5	4.59749	gene_expression_class_II	8	8	7
PPA18813	4.48903	gene_expression_class_II	13	13	13
ppa_stranded_DN26819_c0_g1_i5	4.4437	gene_expression_class_II	7	7	7
PPA39813	4.41744	gene_expression_class_II	21	21	21
ppa_stranded_DN27422_c0_g1_i3	4.36975	gene_expression_class_II	10	10	9
ppa_stranded_DN645_c0_g1_i1	4.27028	gene_expression_class_II	9	9	8
PPA03386	4.14925	gene_expression_class_II	33	33	33
ppa_stranded_DN19212_c0_g1_i1	4.12469	gene_expression_class_II	51	51	20
Iso_D.1006.1	4.12283	gene_expression_class_II	7	7	6
PPA32323	4.10858	gene_expression_class_II	8	8	8
PPA29990	4.10103	gene_expression_class_II	26	26	18
ppa_stranded_DN17501_c0_g1_i1	4.0875	gene_expression_class_II	5	5	5
ppa_stranded_DN12070_c0_g1_i1	4.07892	gene_expression_class_II	7	7	7
PPA20681	4.07266	gene_expression_class_II	23	23	20
ppa_stranded_DN10198_c0_g1_i1	3.96987	gene_expression_class_I	9	9	8
ppa_stranded_DN31566_c0_g1_i1	3.96069	gene_expression_class_I	7	7	7
ppa_stranded_DN23319_c0_g1_i1	3.897	gene_expression_class_I	6	6	6
PPA36993	3.89182	gene_expression_class_I	11	11	10
ppa_stranded_DN12382_c0_g1_i1	3.82535	gene_expression_class_I	10	10	8
PPA11299	3.80559	gene_expression_class_I	15	15	14
PPA33945	3.80426	gene_expression_class_I	27	27	27
ppa_stranded_DN27218_c0_g1_i5	3.77373	gene_expression_class_I	10	10	10
PPA26373	3.69326	gene_expression_class_I	4	4	4
PPA22409	3.52017	gene_expression_class_I	18	18	11
Iso_D.12889.3	3.49635	gene_expression_class_I	5	5	5
PPA33921	3.4654	gene_expression_class_I	7	7	7
ppa_stranded_DN11146_c0_g2_i1	3.44929	gene_expression_class_I	3	3	3
ppa_stranded_DN23287_c0_g1_i1	3.43145	gene_expression_class_I	10	10	10
ppa_stranded_DN31436_c1_g7_i10	3.41098	gene_expression_class_I	16	16	12
ppa_stranded_DN29805_c0_g2_i1	3.3792	gene_expression_class_I	10	10	10
PPA27306	3.35873	gene_expression_class_I	7	7	6
ppa_stranded_DN33441_c0_g1_i1	3.34343	gene_expression_class_I	9	9	7
PPA39232	3.32763	gene_expression_class_I	9	9	5
ppa_stranded_DN15018_c0_g1_i1	3.29935	gene_expression_class_I	7	7	7
PPA38400	3.24799	gene_expression_class_I	20	20	9
ppa_stranded_DN17544_c0_g1_i2	3.24393	gene_expression_class_I	7	7	7
ppa_stranded_DN27466_c1_g1_i2	3.24188	gene_expression_class_I	18	18	18
PPA19833	3.20049	gene_expression_class_I	14	14	10
PPA27681	3.19911	gene_expression_class_I	7	7	7
ppa_stranded_DN23501_c0_g1_i2	3.19708	gene_expression_class_I	11	11	11
PPA35403	3.19562	gene_expression_class_I	14	14	13
ppa_stranded_DN16987_c0_g1_i1	3.18974	gene_expression_class_I	4	4	4
Iso_D.14461.1	3.18499	gene_expression_class_I	11	11	11
ppa_stranded_DN27973_c0_g1_i1	3.16242	gene_expression_class_I	14	14	10
ppa_stranded_DN8487_c0_g1_i1	3.15929	gene_expression_class_I	11	11	11
PPA12395	3.15854	gene_expression_class_I	27	27	18
PPA08894	3.1567	gene_expression_class_I	9	9	9
PPA08866	3.15639	gene_expression_class_I	23	23	16
UMM-S311-3.0-mRNA-1_frag	3.13556	gene_expression_class_I	11	11	6
ppa_stranded_DN19398_c0_g1_i1	3.13491	gene_expression_class_I	4	4	4
PPA34382	3.13481	gene_expression_class_I	12	12	10
ppa_stranded_DN24113_c0_g3_i1	3.13396	gene_expression_class_I	9	9	9
ppa_stranded_DN29153_c1_g1_i5	3.11392	gene_expression_class_I	27	27	18
PPA33663	3.11275	gene_expression_class_I	9	9	8
PPA13112	3.10905	gene_expression_class_I	6	6	6
ppa_stranded_DN28859_c0_g1_i1	3.09106	gene_expression_class_I	9	9	8
PPA25517	3.0627	gene_expression_class_I	16	16	15
PPA16950	3.06011	gene_expression_class_I	10	10	8
PPA26610	3.04129	gene_expression_class_I	14	14	13
ppa_stranded_DN16557_c0_g1_i1	2.97784	gene_expression_class_I	5	5	4
PPA35679	2.95013	gene_expression_class_I	8	8	8
ppa_stranded_DN25380_c0_g2_i1	2.91603	gene_expression_class_I	11	11	8
ppa_stranded_DN262_c0_g1_i1	2.78274	gene_expression_class_I	16	16	12
PPA09733	2.70035	gene_expression_class_I	14	14	14
PPA19559	2.63261	gene_expression_class_I	9	9	4
ppa_stranded_DN30685_c1_g2_i1	2.62984	gene_expression_class_I	10	10	10
Contig11-snapTAU.554	2.60641	gene_expression_class_I	20	20	18
PPA15332	2.57114	gene_expression_class_I	7	7	7
PPA19652	2.57027	gene_expression_class_I	16	16	15
ppa_stranded_DN8664_c0_g1_i1	2.56252	gene_expression_class_I	9	9	7
ppa_stranded_DN30631_c2_g1_i4	2.55972	gene_expression_class_I	7	7	7
PPA37103	2.55042	gene_expression_class_I	11	11	7
PPA24981	2.52593	gene_expression_class_I	16	16	15
ppa_stranded_DN31025_c1_g1_i4	2.52039	gene_expression_class_I	20	20	7
ppa_stranded_DN31142_c2_g2_i3	2.50759	gene_expression_class_I	12	12	12
ppa_stranded_DN28898_c1_g1_i5	2.49976	gene_expression_class_I	11	11	9
ppa_stranded_DN25570_c1_g1_i1	2.49405	gene_expression_class_I	7	7	6
PPA21095	2.43147	gene_expression_class_I	18	18	15
PPA15890	2.37623	gene_expression_class_I	7	7	7
ppa_stranded_DN27453_c0_g1_i1	2.3652	gene_expression_class_I	14	14	7
PPA11097	2.36503	gene_expression_class_I	16	16	12
ppa_stranded_DN23477_c0_g2_i2	2.36486	gene_expression_class_I	14	14	8
PPA37689	2.36398	gene_expression_class_I	11	11	10
PPA38974	2.36268	gene_expression_class_I	26	26	19
PPA04337	2.35993	gene_expression_class_I	7	7	6
ppa_stranded_DN29749_c0_g2_i1	2.35991	gene_expression_class_I	16	16	14
ppa_stranded_DN26811_c1_g1_i1	2.35871	gene_expression_class_I	13	13	8
ppa_stranded_DN20038_c0_g1_i2	2.34833	gene_expression_class_I	7	7	7
Iso_D.6161.1	2.34721	gene_expression_class_I	11	11	11
PPA20109	2.33247	gene_expression_class_I	15	15	12
PPA12544	2.3257	gene_expression_class_I	10	10	5
ppa_stranded_DN17742_c0_g2_i1	2.24075	gene_expression_class_I	9	9	9
ppa_stranded_DN19273_c0_g1_i1	2.17957	gene_expression_class_I	5	5	5
ppa_stranded_DN30337_c0_g1_i4	2.12099	gene_expression_class_I	21	21	21
PPA10025	2.10059	gene_expression_class_I	3	3	3
ppa_stranded_DN29788_c4_g1_i2	2.03602	gene_expression_class_I	18	18	7
ppa_stranded_DN24763_c0_g1_i2	2.01068	gene_expression_class_I	11	11	9
ppa_stranded_DN30796_c0_g1_i20	1.76855	gene_expression_class_I	16	16	8
PPA02402	1.76356	gene_expression_class_I	27	27	10
PPA40372	1.71935	gene_expression_class_I	6	6	6
ppa_stranded_DN30369_c0_g2_i2	1.64282	gene_expression_class_I	25	25	25
ppa_stranded_DN11896_c0_g1_i1	1.52636	gene_expression_class_I	9	9	9
ppa_stranded_DN25269_c0_g1_i1	1.42399	gene_expression_class_I	5	5	5
PPA08638	1.23965	gene_expression_class_I	17	17	15
PPA38612	1.1349	gene_expression_class_I	8	8	8
PPA06527	14.1075	gene_expression_class_III	3	3	3
ppa_stranded_DN30799_c1_g1_i1	12.2346	gene_expression_class_III	4	4	4
PPA40170	12.1308	gene_expression_class_III	3	3	3
PPA30489	11.8528	gene_expression_class_III	3	3	3
ppa_stranded_DN29590_c0_g1_i1	11.5959	gene_expression_class_III	4	4	4
PPA32871	11.5869	gene_expression_class_III	3	3	3
ppa_stranded_DN13896_c0_g1_i1	11.3442	gene_expression_class_III	3	3	3
ppa_stranded_DN18798_c0_g1_i1	11.2585	gene_expression_class_III	4	4	3
PPA40355	11.1845	gene_expression_class_III	2	2	2
ppa_stranded_DN9193_c0_g1_i1	10.9522	gene_expression_class_III	3	3	3
PPA43316	10.9075	gene_expression_class_III	2	2	2
PPA02069	10.8844	gene_expression_class_III	4	4	4
PPA43293	10.8077	gene_expression_class_III	3	3	3
PPA34476	10.7998	gene_expression_class_III	3	3	3
ppa_stranded_DN25290_c0_g1_i1	10.7731	gene_expression_class_III	3	3	3
Iso_D.13304.2	10.6011	gene_expression_class_III	5	5	5
PPA31004	10.5558	gene_expression_class_III	4	4	4
PPA09701	10.4719	gene_expression_class_III	11	11	11
PPA18896	10.4577	gene_expression_class_III	5	5	5
PPA40071	10.4112	gene_expression_class_III	4	4	4
ppa_stranded_DN30681_c0_g1_i1	10.3489	gene_expression_class_III	3	3	3
ppa_stranded_DN24832_c0_g1_i1	10.3413	gene_expression_class_III	2	2	2
ppa_stranded_DN43840_c0_g1_i1	10.2963	gene_expression_class_III	4	4	4
PPA23018	10.119	gene_expression_class_III	4	4	4
PPA17234	10.1115	gene_expression_class_III	4	4	4
ppaxx_rpl-2	10.0939	gene_expression_class_III	5	5	5
PPA21653	10.0435	gene_expression_class_III	4	4	4
ppa_stranded_DN143_c0_g1_i1	10.0088	gene_expression_class_III	4	4	4
PPA36985	10.0012	gene_expression_class_III	3	3	3
ppa_stranded_DN18859_c0_g2_i1	9.94069	gene_expression_class_III	5	5	5
Iso_D.2499.1	9.89776	gene_expression_class_III	3	3	3
PPA40518	9.83885	gene_expression_class_III	3	3	3
PPA04911	9.7432	gene_expression_class_III	7	7	7
Iso_D.8344.1	9.71783	gene_expression_class_III	3	3	3
ppa_stranded_DN25521_c0_g2_i1	9.68675	gene_expression_class_III	5	5	5
ppa_stranded_DN10033_c0_g1_i1	9.66021	gene_expression_class_III	4	4	4
ppa_stranded_DN26808_c0_g1_i6	9.615	gene_expression_class_III	11	11	10
PPA24645	9.50899	gene_expression_class_III	6	6	6
PPA22463	9.48099	gene_expression_class_III	4	4	4
PPA28346	9.4757	gene_expression_class_III	8	8	8
PPA30846	9.45766	gene_expression_class_III	3	3	3
PPA36640	9.44413	gene_expression_class_III	2	2	2
ppa_stranded_DN25176_c0_g1_i1	9.38236	gene_expression_class_III	3	3	3
PPA32072	9.33416	gene_expression_class_III	3	3	3
PPA37268	9.30798	gene_expression_class_III	3	3	3
PPA34610	9.18245	gene_expression_class_III	13	13	12
PPA46383	9.12802	gene_expression_class_III	6	6	6
ppa_stranded_DN31000_c0_g5_i2	9.09562	gene_expression_class_III	7	7	7
ppa_stranded_DN20569_c0_g1_i1	9.08637	gene_expression_class_III	6	6	6
ppa_stranded_DN27655_c0_g2_i1	9.04373	gene_expression_class_III	7	7	7
PPA34078	9.0278	gene_expression_class_III	7	7	7
PPA38622	9.00051	gene_expression_class_III	3	3	3
PPA10645	8.95832	gene_expression_class_III	3	3	2
PPA39015	8.93711	gene_expression_class_III	2	2	2
ppa_stranded_DN29263_c0_g2_i1	8.84952	gene_expression_class_III	3	3	3
PPA45114	8.83478	gene_expression_class_III	10	10	10
ppa_stranded_DN28551_c0_g1_i1	8.83301	gene_expression_class_III	5	5	5
PPA35602	8.81213	gene_expression_class_III	6	6	6
PPA09364	8.75528	gene_expression_class_III	7	7	7
ppa_stranded_DN5006_c0_g1_i1	8.75007	gene_expression_class_III	3	3	3
ppa_stranded_DN26832_c0_g1_i1	8.74876	gene_expression_class_III	7	7	7
PPA19926	8.70831	gene_expression_class_III	5	5	5
ppa_stranded_DN11895_c0_g1_i1	8.68545	gene_expression_class_III	5	5	5
PPA39021	8.61501	gene_expression_class_III	6	6	6
Iso_D.982.1	8.59958	gene_expression_class_III	4	4	4
isopolya.3423.1	8.52995	gene_expression_class_III	4	4	4
PPA12783	8.50458	gene_expression_class_III	11	11	11
PPA20541	8.49252	gene_expression_class_III	3	3	3
ppa_stranded_DN4458_c0_g1_i1	8.47554	gene_expression_class_III	3	3	3
ppa_stranded_DN27383_c0_g1_i1	8.47536	gene_expression_class_III	4	4	4
ppa_stranded_DN25490_c1_g1_i3	8.46628	gene_expression_class_III	3	3	3
ppa_stranded_DN27915_c1_g2_i2	8.45492	gene_expression_class_III	13	13	9
ppa_stranded_DN30977_c1_g3_i3	8.43019	gene_expression_class_III	11	11	10
PPA37695	8.35558	gene_expression_class_III	6	6	6
ppa_stranded_DN36369_c0_g1_i1	8.3481	gene_expression_class_III	3	3	3
PPA05876	8.3442	gene_expression_class_III	16	16	16
PPA27627	8.32858	gene_expression_class_III	11	11	11
PPA40114	8.32446	gene_expression_class_III	4	4	4
ppa_stranded_DN10666_c0_g2_i1	8.31889	gene_expression_class_III	3	3	3
Contig61-snap.66	8.24989	gene_expression_class_III	4	4	3
PPA16856	8.2357	gene_expression_class_III	5	5	5
ppa_stranded_DN27074_c0_g3_i3	8.23274	gene_expression_class_III	5	5	5
PPA01802	8.22503	gene_expression_class_III	4	4	4
ppa_stranded_DN33_c0_g2_i1	8.22013	gene_expression_class_III	3	3	3
ppa_stranded_DN29897_c0_g3_i1	8.2101	gene_expression_class_III	5	5	5
ppa_stranded_DN15601_c0_g1_i1	8.18637	gene_expression_class_III	3	3	3
ppa_stranded_DN16567_c0_g1_i2	8.16897	gene_expression_class_III	8	8	8
PPA09441	8.16465	gene_expression_class_III	3	3	3
PPA14014	8.15531	gene_expression_class_III	4	4	4
Y48C3A.18	8.13937	gene_expression_class_III	6	6	6
ppa_stranded_DN33124_c0_g1_i1	8.10547	gene_expression_class_III	5	5	5
ppa_stranded_DN37773_c0_g1_i1	8.10201	gene_expression_class_III	4	4	4
ppa_stranded_DN16353_c0_g2_i1	8.09752	gene_expression_class_III	5	5	5
PPA18479	8.09568	gene_expression_class_III	7	7	7
PPA08902	8.09074	gene_expression_class_III	4	4	4
ppa_stranded_DN16914_c0_g2_i1	8.05163	gene_expression_class_III	4	4	4
PPA08051	8.05011	gene_expression_class_III	4	4	4
ppa_stranded_DN20507_c0_g1_i1	8.04926	gene_expression_class_III	4	4	4
ppa_stranded_DN44499_c0_g1_i1	8.02324	gene_expression_class_III	14	14	14
PPA38444	8.00554	gene_expression_class_III	5	5	5
